# Supplementary material
Source: PubMed Central journal article supplement (PMC3944088)
Supplement: NIHMS540784-supplement-1_si_001.pdf [file NIHMS540784-supplement-1_si_001.pdf]

## **SUPPLEMENTARY MATERIAL**

### **GSK3 alpha and beta are new functionally relevant targets of tivantinib in lung cancer cells**

Lily L. Remsing Rix<sup>1#</sup>, Brent M. Kuenzi<sup>1#</sup>, Yunting Luo<sup>1</sup>, Elizabeth Remily-Wood<sup>3</sup>, Fumi Kinose<sup>2</sup>, Gabriela Wright<sup>1</sup>, Jiannong Li<sup>2</sup>, John M. Koomen<sup>3</sup>, Eric B. Haura<sup>2</sup>, Harshani R. Lawrence<sup>1</sup> and Uwe Rix<sup>1\*</sup>

<sup>1</sup> Department of Drug Discovery, H. Lee Moffitt Cancer Center & Research Institute, Tampa, Florida, USA

<sup>2</sup> Department of Thoracic Oncology, H. Lee Moffitt Cancer Center & Research Institute, Tampa, Florida, USA

<sup>3</sup> Molecular Oncology and Proteomics, H. Lee Moffitt Cancer Center & Research Institute, Tampa, Florida, USA

# These authors contributed equally.

## Supplementary Legends

**Figure S1. Compound synthesis and cellular evaluation.** (A) Full synthetic route for preparation of (-)-tivantinib, (+)-tivantinib and their coupleable analogues. For a detailed description of the synthesis see Supplementary Methods. (B) Enantiomeric differential inhibition of cellular viability of A549 by c-(-)-tivantinib and c-(+)-tivantinib compared with (-)-tivantinib and (+)-tivantinib.

**Figure S2. Determination of tivantinib's kinase target interaction profile in H1648 cells by chemical proteomics.** Phylogenetic tree of the human protein kinome displaying targets identified by affinity chromatography experiments with coupled tivantinib analogues in H1648 cells. Node size indicates the average ratio of the number of unique spectra to the molecular weight of the proteins identified with the c-(-)-tivantinib affinity matrix. Node color corresponds to the ratio of the number of unique spectra identified by c-(-)-tivantinib to c-(+)-tivantinib affinity chromatography experiments. Displayed are all protein kinases that have been observed with 2 or more unique spectra across both biological replicates of the (-)-tivantinib affinity purifications.

**Figure S3. Functional analysis of c-MET inhibition.** Inhibition of c-MET *in vitro* kinase activity by (-)-tivantinib on the Reaction Biology assay platform. Values are the mean of experimental duplicates and relative to DMSO control.

**Figure S4. Effects of GSK3 inhibition by tivantinib on  $\beta$ -catenin.** Total  $\beta$ -catenin protein levels in A549 cells are elevated after 72 hours of tivantinib and BIO treatment at the indicated concentrations ( $\mu$ M).

**Figure S5. Effects of tivantinib treatment on GSK3-dependent MLL-rearranged leukemia cells.**

(A) Tivantinib and the pan-GSK3 inhibitors BIO and LiCl, but not the MET inhibitor PF-04217903 inhibit cell viability of MV-4-11 and RS4;11 MLL-rearranged leukemia cells. (B) MV-4-11 cells were treated with 1  $\mu$ M tivantinib, 20 mM LiCl or DMSO as control for 24 or 48 hours and analyzed for effects on cell cycle. DAPI DNA staining revealed an accumulation of cells at G1 following treatment with either tivantinib or LiCl. (C) Total  $\beta$ -catenin protein levels in MV-4-11 cells are elevated after 24 hours of the indicated concentration of tivantinib or 20 mM LiCl treatment.

**Figure S6. Cell cycle analysis following treatment of A549 cells with tivantinib.** A549 NSCLC cells were treated with 2.5  $\mu$ M tivantinib or DMSO as control for 3, 6 and 24 hours, respectively. At all time points, drug treatment led to (A) upregulation of the G2/M marker phospho-histone H3 (Ser10) and (B) G2/M arrest as visualized by DAPI DNA staining.

**Figure S7. Cell morphology following GSK3 inhibition.** A549 cells displayed characteristic morphological changes upon (-)-tivantinib treatment (A) as well as single and combined GSK3 $\alpha$  and GSK3 $\beta$  siRNA-mediated knockdowns. (B) Images were captured at 24 hours post drug treatment and 72 hours post transfection using an inverted Zeiss Axio Observer Z1 microscope

at 100x magnification with a 10x/0.3NA dry objective and Nomarski DIC contrasting prisms. The images were taken using an AxioCamMR3 camera and scale bars were added using the Axiovision 4.6 software suite.

**Figure S8. Functional Analysis of GSK3 inhibition.** (A) Effects of individual or combined siRNA-mediated knockdowns of c-MET, GSK3 $\alpha$  and GSK3 $\beta$  in A549 cells on PARP-1 cleavage and c-MET levels 72 hours post transfection (B) Relative A549 cell counts are reduced following GSK3 $\alpha/\beta$  siRNA-mediated knockdown 96 hours post transfection. White arrows point at characteristically rounded-up cells.

**Table S1. LC-MS/MS data for chemical proteomics experiments with c-(-)-tivantinib (9) and c-(+)-tivantinib (10) in A549 cells.** Listed are unique spectrum counts for each protein across replicate and control experiments. 'Accession number' represents the UniProt accession code.

**Table S2. Full LC-MS/MS data for chemical proteomics experiments with c-(-)-tivantinib (9) and c-(+)-tivantinib (10) in A549 cells.** Listed are unique peptide counts, unique spectrum counts, total spectrum counts and amino acid sequence coverage for each protein in each individual experiment. 'Protein accession' represents the UniProt accession code; 'Probability' represents protein identification probability.

**Table S3. LC-MS/MS data for chemical proteomics experiments with c-(-)-tivantinib (9) and c-(+)-tivantinib (10) in H1648 cells.** Listed are unique spectrum counts for each protein across replicate and control experiments. 'Accession number' represents the UniProt accession code.

**Table S4. Full LC-MS/MS data for chemical proteomics experiments with c-(-)-tivantinib (9) and c-(+)-tivantinib (10) in H1648 cells.** Listed are unique peptide counts, unique spectrum counts, total spectrum counts and amino acid sequence coverage for each protein in each individual experiment. 'Protein accession' represents the UniProt accession code; 'Probability' represents protein identification probability.

## **Supplementary Methods**

### **Cell culture and reagents**

A427, A549, H1155, H1355, H1395, H1437, H157, H1581, H1648, H1755, H2122, H2228, H2286, H23, H322, H358, H441, H460, H520, H522, H596, H650, H82 and HCC366 cells were provided by the Moffitt Lung Cancer Center of Excellence Cell Line Core and were cultured in RPMI 1640 media containing 10% FBS (complete RPMI). MV-4-11 and RS4;11 cells were a kind gift from G. Superti-Furga (CeMM, Vienna, Austria) and cultured in IMDM and RPMI 1640 (both 10% FBS), respectively. Crizotinib, cabozantinib (ChemieTek), PF-04217903 (Selleckchem), PHA-665752 (Pfizer) and 6-bromoindirubin-3'-oxime (BIO, Cayman Chemical) were dissolved in DMSO (10mM) and LiCl (Sigma-Aldrich) was dissolved in H<sub>2</sub>O (10M).

### **Viability assays**

Cell viability assays were conducted according to manufacturer's recommendations for CellTiter-Glo Luminescent Cell Viability Assay (Promega). Inhibitors were diluted in complete media at the indicated concentrations. Cells were seeded at a density of 1000 cells/well (A549: 500 cells/well) in a 384-well microtiter plate, treated with drug after 24 hours and grown for another 72 to 96 hours before addition of CellTiter-Glo reagent and readout on a M5 Spectramax plate reader (Molecular Devices). Raw data was analyzed using GraphPad Prism.

### **Flow cytometry**

Cells were treated as indicated with DMSO, tivantinib or LiCl. After incubation, the cells were harvested and fixed with 70% ice-cold ethanol and stored at -20°C until analysis. To determine cell cycle status, cells were washed with PBS and incubated in a 1µg/mL DAPI (4',6-Diamidino-2-phenylindole, Sigma)/0.1% Triton X-100/PBS staining solution on ice for 30-60 min in the dark. Analyses were conducted using a FACSCanto II benchtop analyzer (BD Biosciences) and ModFitLT V3.2.1(Mac) software.

### **Immunoblotting**

Cells were lysed using 0.20% NP40, 50 mM Tris pH 7.5, 5% Glycerol, 1.5 mM MgCl<sub>2</sub>, 100 mM NaCl lysis buffer containing 25 mM NaF, 1 mM Na<sub>3</sub>VO<sub>4</sub>, 1 mM PMSF, 1 mM DTT, 30 µM TLCK, 30 µM TPCK, 1 µg/mL Leupeptin, 1 µg/mL Aprotinin and 10 µg/mL Trypsin Inhibitor. Lysates were resolved by SDS-PAGE and incubated with primary antibodies against actin (Sigma,

A5441),  $\beta$ -catenin (Santa Cruz, sc-7199), GSK3 $\alpha$  (#4337), GSK3 $\beta$  (#9315), c-MET (#3127), phospho-c-MET (Tyr1234/1235) (#3129), phospho-Histone H3 (Ser10) (#3377) or PARP-1 (#9542) (all Cell Signaling). Secondary antibodies were anti-rabbit or anti-mouse (GE Healthcare).

### **Kinase assays**

*In vitro* kinase inhibition assays and IC<sub>50</sub> determinations were performed on the Reaction Biology *Kinase Hotspot*<sup>SM</sup> and Millipore *KinaseProfiler*<sup>TM</sup> platforms using 10  $\mu$ M ATP. Inhibition of c-MET by (-)-tivantinib was determined at concentrations of 0.1, 1 or 10  $\mu$ M. (-)-Tivantinib and (+)-tivantinib IC<sub>50</sub> values for GSK3 $\alpha$  and GSK3 $\beta$  were determined using 10 dose 3-fold serial dilution series starting at 20  $\mu$ M (Reaction Biology). Millipore IC<sub>50</sub> values for (-)-tivantinib and (+)-tivantinib on GSK3 $\alpha$  and GSK3 $\beta$  were determined using a 9 dose 3-fold serial dilution series starting at 30  $\mu$ M.

### **RNA interference**

siRNAs used were GSK3 $\alpha$ -1 (Qiagen, targeting 5'-AAGTGATTGGCAATGGCTCAT-3'),(1) GSK3 $\alpha$ -2 (Cell Signaling, #6312), GSK3 $\beta$ -1 (Qiagen, targeting 5'-AAGTAATCCACCTCTGGCTAC-3'),(1) GSK3 $\beta$ -2 (Dharmacon SMARTpool, L-003010-00-0005), GSK3 $\alpha$ / $\beta$ -dual-1 (Cell Signaling, #6301), GSK3 $\alpha$ / $\beta$ -dual-2 (Qiagen, targeting 5'-AAGAATCGAGAGCTCCAGATC-3'),(1) and c-MET (Santa Cruz, sc-29397). Dual knockdown of GSK3 $\alpha$  and GSK3 $\beta$  was achieved either by combination of GSK3 $\alpha$ -1 and GSK3 $\beta$ -1 or through GSK3 $\alpha$ / $\beta$ -dual-1 or GSK3 $\alpha$ / $\beta$ -dual-2 single siRNAs targeting both genes simultaneously. Transfection of these siRNAs was conducted in a 6-

well plate using Lipofectamine RNAiMAX Transfection Reagent (Invitrogen) according to manufacturers' instructions. Non-targeting siRNA was used as control (Dharmacon, D-001810-10-20). Gene silencing was monitored by immunoblotting.

### **Affinity purification and mass spectrometry**

A549 and H1648 cells were lysed as described previously. c-Tivantinib was immobilized on NHS-activated Sepharose for Fast Flow resin (GE Healthcare) and blocked for 4 hours. Affinity chromatography experiments with c-(-)-tivantinib (9) and c-(+)-tivantinib (10) were performed in duplicate essentially as described previously<sup>(2)</sup> using total cell lysates containing 10 mg of protein over a 6 hour incubation time and omitting phosphatase inhibitors. Competition experiments were performed via pre-treatment of total cell lysate with 20  $\mu$ M BIO for 2 hours prior to affinity chromatography. Eluates were loaded on a Criterion<sup>TM</sup> XT Precast Gel (Bio-Rad), run briefly into the gel and excised as a single piece before performing an in-gel trypsin digestion as described previously.<sup>(2)</sup> LC-MS/MS analysis of A549 samples was performed on a linear ion trap (LTQ, Thermo Fisher) mass spectrometer coupled to a nanoflow liquid chromatograph (U3000, Dionex). Samples were first loaded onto a trap column (5mm x 300  $\mu$ m ID packed with C18 reversed-phase resin, 5 $\mu$ m, 100Å) and washed for 3 minutes at 8  $\mu$ L/ minute. The trapped peptides were eluted onto the analytical column (C18, 75  $\mu$ m ID x 15 cm, Pepmap 100, Dionex). Peptides were eluted in a 60 minute gradient from 5% B to 45%B (solvent A: 2% acetonitrile + 0.1% formic acid; solvent B: 90% acetonitrile + 0.1% formic acid) with a flow rate of 300 nl/min. Five tandem mass spectra were collected in a data-dependent manner following each survey scan. Data was searched against the UniProt human protein

database using the Sequest (Thermo Fisher) search engine. Carbamidomethylation of cysteine, and methionine oxidation were selected as variable modifications. Three trypsin missed cleavages were allowed. Search results were summarized in Scaffold 4.0. Precursor mass tolerance is set to 1.2 and fragment ion tolerance to 1.0.

H1648 samples were analyzed on a hybrid LTQ-Orbitrap mass spectrometer (Thermo Fisher) coupled to a nanoflow liquid chromatograph (U3000, Dionex). Sample were first loaded onto a pre-column (5mm x 300  $\mu$ m ID packed with C18 reversed-phase resin, 5 $\mu$ m, 100Å) and washed for 8 minutes with aqueous 2% acetonitrile and 0.04% trifluoroacetic acid. The trapped peptides were eluted onto the analytical column, (C18, 75  $\mu$ m ID x 15 cm, Pepmap 100, Dionex, Sunnyvale, CA). The 120-minute gradient was programmed as: 95% solvent A (2% acetonitrile + 0.1% formic acid) for 8 minutes, solvent B (90% acetonitrile + 0.1% formic acid) from 5% to 50% in 90 minutes, then solvent B from 50% to 90% B in 7 minutes and held at 90% for 5 minutes, followed by solvent B from 90% to 5% in 1 minute and re-equilibrate for 10 minutes. The flow rate on analytical column was 300 nl/min. Five tandem mass spectra were collected in a data-dependent manner following each survey scan. The MS scans were performed in Orbitrap to obtain accurate peptide mass measurement and the MS/MS scans were performed in linear ion trap using 60 second exclusion for previously sampled peptide peaks. Data was searched against the UniProt human protein database using the Sequest (Thermo Fisher) search engine. Carbamidomethylation of cysteine and methionine oxidation were selected as variable modifications. Three trypsin missed cleavages were allowed, the precursor mass tolerance was 1.2 Da. MS/MS mass tolerance was 1.0 Da. Search results were summarized in Scaffold 4.0.

After LC-MS/MS analysis, the remaining A549 pulldown samples were dried by vacuum centrifugation, redissolved and spiked with SIS peptides. Liquid chromatography-MRM MS experiments were conducted on a triple quadrupole MS (TSQ Quantum Ultra, Thermo Fisher) as previously described.<sup>(3)</sup> Absolute quantification was achieved by comparing the ratio of total peak area for all detected transitions of the endogenous and SIS peptides using Skyline v.1.3.30. SIS peptides used were the following: c-MET- VADFLGAR, GSK3 $\beta$ - QTLPVIYVK, and GSK3 $\alpha$ - LTIPILYVK, where the bold, underlined amino acid was stable isotope-labeled with <sup>13</sup>C and <sup>15</sup>N.

### Experimental procedures for chemical synthesis

The synthesis of intermediate **2** was carried out according to the literature-reported protocols<sup>(4-6)</sup> from the commercially available starting material tetrahydroquinoline (**1**). The intermediate **2** was achieved *via* 5 steps with 40% overall yield.

***Tert*-butyl 3-(3-(2-amino-2-oxoethyl)-1H-indol-1-yl)propylcarbamate (**4**):** The starting material, Indole-3-acetamide **3** (0.114 g, 1.30 mmol) in DMF (0.5 mL) was added drop wise, under argon atmosphere at 0 °C to a stirred suspension of sodium hydride (39 mg, 60% in mineral oil, washed with hexane prior to the reaction) in DMF (0.5 mL). The reaction mixture was stirred under inert conditions for 1 h, cooled to 0 °C, added *tert*-butyl 3-bromopropylcarbamate (233 mg, 1.96 mmol) in DMF (0.5 mL), and stirred at r.t. overnight (12-14 h). The reaction was monitored using HPLC-MS and TLC (4% MeOH in DCM,  $R_f$  = 0.4, major spot and other minor impurities). The HPLC-MS showed completion of the reaction. The crude reaction mixture was diluted with ethyl acetate (15 mL) and the organic layer was washed with water (10 mL x 3).

Combined organic phase was separated, dried ( $\text{MgSO}_4$ ), filtered and concentrated to dryness to obtain a colorless foamy solid (250 mg, 116% yield). This product was taken to the next stage without further purification.  $^1\text{H}$  NMR (400 MHz,  $\text{DMSO-d}_6$ )  $\delta$  7.53 (d,  $J$  = 8.0 Hz, 1H), 7.38 (d,  $J$  = 8.0 Hz, 1H), 7.32 (br s, 1H), 7.21 (s, 1H), 7.09 (t,  $J$  = 8.0 Hz, 1H), 7.00-6.95 (m, 2H), 6.84 (br s, 1H), 4.11 (t,  $J$  = 6.8 Hz, 2H), 3.43 (s, 2H), 2.91-2.87 (m, 2H), 1.85-1.77 (m, 2H), 1.36 (s, 9H); HPLC-MS (ESI+)  $m/z$  332.2 ( $M + H$ ) $^+$ .

**3-(1-(3-Aminopropyl)-1H-indol-3-yl)-4-(5,6-dihydro-4H-pyrrolo[3,2,1-ij]quinolin-1-yl)-1H-pyrrole-2,5-dione (6).** To a mixture of methyl 2-(5,6-dihydro-4H-pyrrolo[3,2,1-ij]quinolin-1-yl)-2-oxoacetate (**2**) (365 mg, 1.5 mmol) and **4** (546 mg, 1.65 mmol) in anhydrous THF (2.5 mL) was added a solution of potassium *tert*-butoxide (4.5 mL, 1M, THF) drop wise over 30 minutes. The reaction mixture was stirred at 0 °C for 2 h, and monitored by TLC (TLC showed no starting material [ $R_f$  = 0.8, 60% ethyl acetate in hexane] left in the reaction mixture). Concentrated HCl (3.65 mL) was added drop wise at 0 °C and the reaction mixture was allowed to warm to r.t. and stirred for an additional hour. The mixture was diluted with EtOAc (60 mL), washed with water (2 x 25 mL) and brine (25 mL). Combined organic phase was dried ( $\text{Na}_2\text{SO}_4$ ), filtered and concentrated. Only 200 mg of crude product recovered from the organic phase (according to the  $^1\text{H}$  NMR majority of the isolated product was impurity). The aqueous layer was neutralized (sat.  $\text{NaHCO}_3$ , pH: 8-9), and extracted with EtOAc (2 x 25 mL). Combined EtOAc was dried ( $\text{Na}_2\text{SO}_4$ ) and concentrated and only a small amount of required product (mainly impurity) was isolated. The sticky red solid that was precipitated in the aqueous layer was decanted and dissolved in MeOH (10 mL). Methanol was evaporated under high vacuum to afford the

required product **6** as a red solid (512 mg, 81% yield). The NMR and HPLC-MS indicated isolation of the pure amine **6**.  $^1\text{H}$  NMR (400 MHz,  $\text{CD}_3\text{OD}$ )  $\delta$  7.79 (s, 1H), 7.63 (s, 1H), 7.43 (d,  $J$  = 8.4 Hz, 1H), 7.08 (apparent t,  $J$  = 7.2 Hz, 1H), 7.00 ( $J$  = 8.0 Hz, 1H), 6.74-6.70 (m, 2H), 6.50 (t,  $J$  = 8.0 Hz, 1H), 6.42 (d,  $J$  = 8.0 Hz, 1H), 4.32 (t,  $J$  = 6.8 Hz, 2H), 4.22 (t,  $J$  = 5.6 Hz, 2H), 2.94 (t,  $J$  = 6.0 Hz, 2H), 2.79 (apparent t,  $J$  = 7.6 Hz, 2H), 2.24-2.19 (m, 2H), 2.15-2.08 (m, 2H); HPLC-MS (ESI+)  $m/z$  425.3 ( $\text{M} + \text{H}$ ) $^+$ ; LC-MS (ESI+)  $m/z$  447.2 ( $\text{M} + \text{Na}$ ) $^+$ ; HRMS (ESI + ve)  $m/z$  calculated for  $\text{C}_{26}\text{H}_{25}\text{N}_4\text{O}_2$  ( $\text{M} + \text{H}$ ) $^+$  425.1972, found 425.1968.

**Synthesis of ( $\pm$ )-trans-3-(1-(3-aminopropyl)-1H-indol-3-yl)-4-(5,6-dihydro-4H-pyrrolo[3,2,1-ij]quinolin-1-yl)pyrrolidine-2,5-dione (**9** and **10** as a racemic mixture).** To a solution of **6** (164 mg, 0.386 mmol) in anhydrous MeOH (5 mL), magnesium turnings were added and heated to reflux under inert atmosphere for 40 min. The color of the reaction mixture was changed from red to pink. The reaction mixture was cooled to r.t. and methanol was evaporated. 1M HCl (30 mL) was added to dissolve the solid followed by sat. sodium bicarbonate (drop wise) to neutralize the mixture (pH = 8-9). The crude mixture was extracted with DCM (30 mL x 3) and the combined organic phase was dried ( $\text{Na}_2\text{SO}_4$ ), filtered and concentrated to obtain the crude product (130 mg) as a pink solid (i.e. **9** and **10** as a racemic mixture). The crude product was purified using  $\text{SiO}_2$  chromatography by gradient elution of DCM:MeOH (100% DCM to 75% DCM and Methanol). The  $\text{SiO}_2$  column was pre washed/eluted with 1% triethylamine in DCM. [TLC; 20% MeOH in DCM, product  $R_f$  = 0.1]. The product isolated from  $\text{SiO}_2$  chromatography was recrystallized using EtOAc: Hexane (1:1) to afford the desired pure product ( $\pm$ )-trans-3-(1-(3-aminopropyl)-1H-indol-3-yl)-4-(5,6-dihydro-4H-pyrrolo[3,2,1-ij]quinolin-1-yl)pyrrolidin-2,5-

dione (**9** and **10** as a racemic mixture) as a pale pink solid (72 mg, 44%).  $^1\text{H}$  NMR (400 MHz,  $\text{CD}_3\text{OD}$ )  $\delta$  7.44 (d,  $J = 8.4$  Hz, 1H), 7.33 (d,  $J = 8.0$  Hz, 1H), 7.20-7.16 (m, 2H), 7.10-7.08 (m, 2H), 7.01 (t,  $J = 8.0$  Hz, 1H), 6.92-6.85 (m, 2H), 4.45 (dd,  $J = 9.2, 6.4$  Hz, 2H), 4.20 (t,  $J = 6.8$  Hz, 2H), 4.12 (apparent t,  $J = 5.6$  Hz, 2 H), 2.96 (t,  $J = 6.0$  Hz, 2H), 2.64 (t,  $J = 7.2$  Hz, 2H), 2.22-2.16 (m, 2H), 2.01-1.96 (m, 2H); HPLC-MS (ESI+)  $m/z$  427.2 ( $\text{M} + \text{H}$ ) $^+$ ; LC-MS (ESI+)  $m/z$  427.2 ( $\text{M} + \text{H}$ ) $^+$ ; HRMS (ESI + ve)  $m/z$  calculated for  $\text{C}_{26}\text{H}_{27}\text{N}_4\text{O}_2$  ( $\text{M} + \text{H}$ ) $^+$  427.2129, found 427.2124.

**Separation of the ( $\pm$ )-trans-3-(1-(3-aminopropyl)-1H-indol-3-yl)-4-(5,6-dihydro-4H-pyrrolo[3,2,1-ij]quinolin-1-yl)pyrrolidine-2,5-dione using chiral analytical HPLC and chiral preparative HPLC.**

**a) Development of analytical HPLC conditions for separation of the racemic mixture.**

Analytical HPLC was performed using a JASCO HPLC system equipped with a PU-2089 Plus quaternary gradient pump and a UV-2075 Plus UV-VIS detector, and using a CHIRALPAK AD column (250 x 4.6 mm). The racemic mixture ( **$\pm$ )-trans-3-(1-(3-aminopropyl)-1H-indol-3-yl)-4-(5,6-dihydro-4H-pyrrolo[3,2,1-ij]quinolin-1-yl)pyrrolidine-2,5-dione** was separated with method A: 80% IPA, 20% Hexane, 0.5 mL/min., 60 min.; analytical chromatography yielded a faster eluting peak with  $t_R = 17.5$  min. and a slower eluting peak with  $t_R = 40.9$  min. (Chromatogram-1). The two peaks in chromatogram-1 appeared broad. The enantiomers were separated with better resolution with method B: 40% IPA, 60% Hexane (0.1% TFA), 0.5 mL/min., 60 min.; analytical chromatography yielded a faster eluting peak with  $t_R = 12.2$  min. and a slower eluting peak with  $t_R = 32.0$  min. (Chromatogram-2). Chromatogram-2 showed better resolution of peaks. However, when method B with 0.1% TFA was transferred to preparative

chiral HPLC, the separated enantiomers had decomposed according to the  $^1\text{H}$  NMR and LCMS analysis. Therefore, method B was further modified to 30% IPA and 70% Hexane, 120 min., 0.5 mL/min. and analytical HPLC runs were performed without TFA (**Method C**).

### Chromatogram 1

#### Area Percent Report

Data File: C:\HPLC data\Yunting\Riv-Tiva\YL7-075B2-1580 IPA 20HEX 0.5 ml 60min.met10-17-2012  
11:58:39 AM.dat  
Acquired: 10/17/2012 11:51:32 AM  
3:19:45 PM

Page 1 of 1

Printed: 10/17/2012

Analyst: System  
Sample ID: YL7-075B2-15

Vial: N/A

Injection Volume: 0

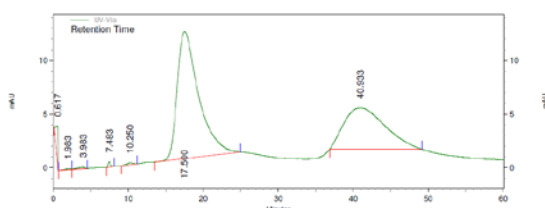

#### UV-Vis Results

| Name   | Retention Time | Area    | Area Percent | Integration Codes |
|--------|----------------|---------|--------------|-------------------|
|        | 0.617          | 64229   | 1.632        | BB                |
|        | 1.983          | 6845    | 0.174        | RV                |
|        | 3.983          | 11383   | 0.289        | VB                |
|        | 7.483          | 11834   | 0.301        | BB                |
|        | 10.250         | 10961   | 0.279        | BB                |
|        | 17.500         | 2356908 | 59.904       | BB                |
|        | 40.933         | 1472297 | 37.421       | MM                |
| Totals |                | 3934458 | 100.000      |                   |

### Chromatogram 2

#### Area Percent Report

Data File: C:\HPLC data\Yunting\Riv-Tiva\YL7-075B2-3540IPA60HEX 0.1 TFA 0.5 ml  
60min.met10-23-2012 1:49:08 PM.dat  
Acquired: 10/23/2012 1:49:30 PM  
2:34:50 PM

Page 1 of 1

Printed: 10/23/2012

Analyst: System

Sample ID: YL7-075B2-35

Vial: N/A

Injection Volume: 0

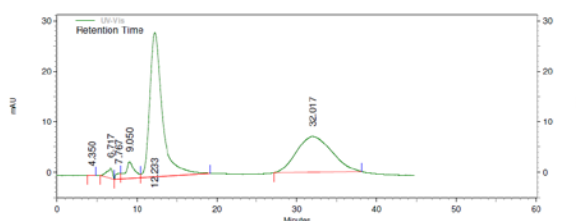

#### UV-Vis Results

| Name   | Retention Time | Area    | Area Percent | Integration Codes |
|--------|----------------|---------|--------------|-------------------|
|        | 4.350          | 1860    | 0.033        | BB                |
|        | 6.717          | 103567  | 1.832        | BB                |
|        | 7.767          | 42769   | 0.756        | BV                |
|        | 9.050          | 243360  | 4.304        | VV                |
|        | 12.233         | 3079471 | 54.460       | VB                |
|        | 32.017         | 2183543 | 38.616       | MM                |
| Totals |                | 5654570 | 100.000      |                   |

Method C was adapted to preparative HPLC conditions as described below.

**b) Development of preparative chiral HPLC for separation of ( $\pm$ ) trans-3-(1-(3-aminopropyl)-1H-indol-3-yl)-4-(5,6-dihydro-4H-pyrrolo[3,2,1-ij]quinolin-1-yl)pyrrolidine-2,5-dione (mixture of 9 and 10).**

A mixture of ( $\pm$ ) trans-3-(1-(3-aminopropyl)-1H-indol-3-yl)-4-(5,6-dihydro-4H-pyrrolo[3,2,1-ij]quinolin-1-yl)pyrrolidine-2,5-dione (57 mg) was subjected to preparative chiral HPLC using a JASCO HPLC system equipped with a PU-2086 Plus quaternary gradient pump and a MD-2010 Plus multi-wavelength detector, and using a CHIRALPAK AD column (250 x 21 mm). The racemic

mixture was separated using method C: 30% IPA, 70% Hexane, 10 mL/min., 120 min. The preparative chiral chromatography yielded a faster eluting peak ( $t_R = 16.9$  min.) of the trans isomer having a negative optical rotation ( $[\alpha]_D^{25} - 103.7$  (c: 19.5 mg in 1.7 mL Methanol) assigned to (-) (3*R*,4*R*)-3-(1-(3-aminopropyl)-1*H*-indol-3-yl)-4-(5,6-dihydro-4*H*-pyrrolo[3,2,1-*ij*]quinolin-1-yl)pyrrolidine-2,5-dione (**9**)(4) and a slower eluting peak ( $t_R = 53.3$  min.) of the trans isomer having a positive optical rotation ( $[\alpha]_D^{25} + 89.6$  (c: 20.5 mg in 1.7 mL Methanol) assigned to (+) (3*S*,4*S*)-3-(1-(3-aminopropyl)-1*H*-indol-3-yl)-4-(5,6-dihydro-4*H*-pyrrolo[3,2,1-*ij*]quinolin-1-yl)pyrrolidine-2,5-dione (**10**).(4) Optical Rotations were conducted in Methanol at 25°C. Absolute stereochemical assignments were based upon relative retention time of related compounds.(4) Total of 57 mg of racemic mixture (15 mg in 50-100 µl of DCM/injection) was used for preparative HPLC chromatography; 19.5 mg of the faster eluting peak (**R,R-9**) and 20.5 mg of the slower eluting peak (**S,S-10**) were isolated.

#### Area % Report

Page 1 of 1

Data File: C:\EZChrom Elite\Enterprise\Projects\HTS Chemistry\Data\Yunting\Prep chiral\YL7-075 Prep4  
 IPA-30-Hex-70 10 mL 120 min.met 11-13-2012 3-03-23 PM.dat  
 Method: C:\EZChrom Elite\Enterprise\Projects\HTS Chemistry\Method\Yunting\Prep  
 Chiral\IPA-30-Hex-70 10 mL 120 min.met  
 Acquired: 11/13/2012 3:07:18 PM  
 Printed: 11/20/2012 2:05:19 PM

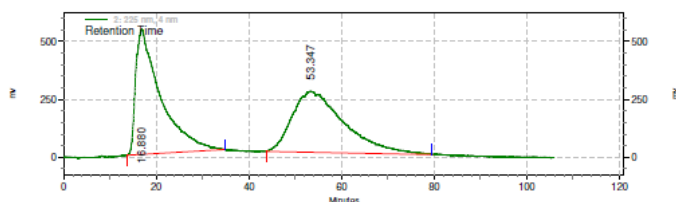

#### 2: 225 nm, 4 nm Results

| Retention Time | Area      | Area % |
|----------------|-----------|--------|
| 16.880         | 202941377 | 49.62  |
| 53.347         | 206069514 | 50.38  |
| Totals         | 409010891 | 100.00 |

1. Chen, S., Cao, W., Yue, P., Hao, C., Khuri, F. R., and Sun, S. Y. (2011) Celecoxib promotes c-FLIP degradation through Akt-independent inhibition of GSK3, *Cancer Res* 71, 6270-6281.
2. Rix, U., Hantschel, O., Durnberger, G., Rensing Rix, L. L., Planyavsky, M., Fernbach, N. V., Kaupe, I., Bennett, K. L., Valent, P., Colinge, J., Kocher, T., and Superti-Furga, G. (2007) Chemical proteomic profiles of the BCR-ABL inhibitors imatinib, nilotinib, and dasatinib reveal novel kinase and nonkinase targets, *Blood* 110, 4055-4063.
3. Remily-Wood, E. R., Liu, R. Z., Xiang, Y., Chen, Y., Thomas, C. E., Rajyaguru, N., Kaufman, L. M., Ochoa, J. E., Hazlehurst, L., Pinilla-Ibarz, J., Lancet, J., Zhang, G., Haura, E., Shibata, D., Yeatman, T., Smalley, K. S., Dalton, W. S., Huang, E., Scott, E., Bloom, G. C., Eschrich, S. A., and Koomen, J. M. (2011) A database of reaction monitoring mass spectrometry assays for elucidating therapeutic response in cancer, *Proteomics Clin Appl* 5, 383-396.
4. Li, C. J., Ashwell, M. A., Hill, J., Moussa, M. M., and Munshi, N. (2006) Preparation of maleimide derivatives, pharmaceutical compositions and methods for treatment of cancer, p 133 pp., ArQule, Inc., USA .
5. Faul, M. M., Gillig, J. R., Jirousek, M. R., Ballas, L. M., Schotten, T., Kahl, A., and Mohr, M. (2003) Acyclic N-(azacycloalkyl)bisindolylmaleimides: isozyme selective inhibitors of PKC $\beta$ , *Bioorg. Med. Chem. Lett.* 13, 1857-1859.
6. Faul, M. M., Grutsch, J. L., Kobierski, M. E., Kopach, M. E., Krumrich, C. A., Staszak, M. A., Udodong, U., Vicenzi, J. T., and Sullivan, K. A. (2003) Strategies for the synthesis of N-(azacycloalkyl)bisindolylmaleimides: selective inhibitors of PKC $\beta$ , *Tetrahedron* 59, 7215-7229.

# Remsing Rix et al., Figure S1

**A**

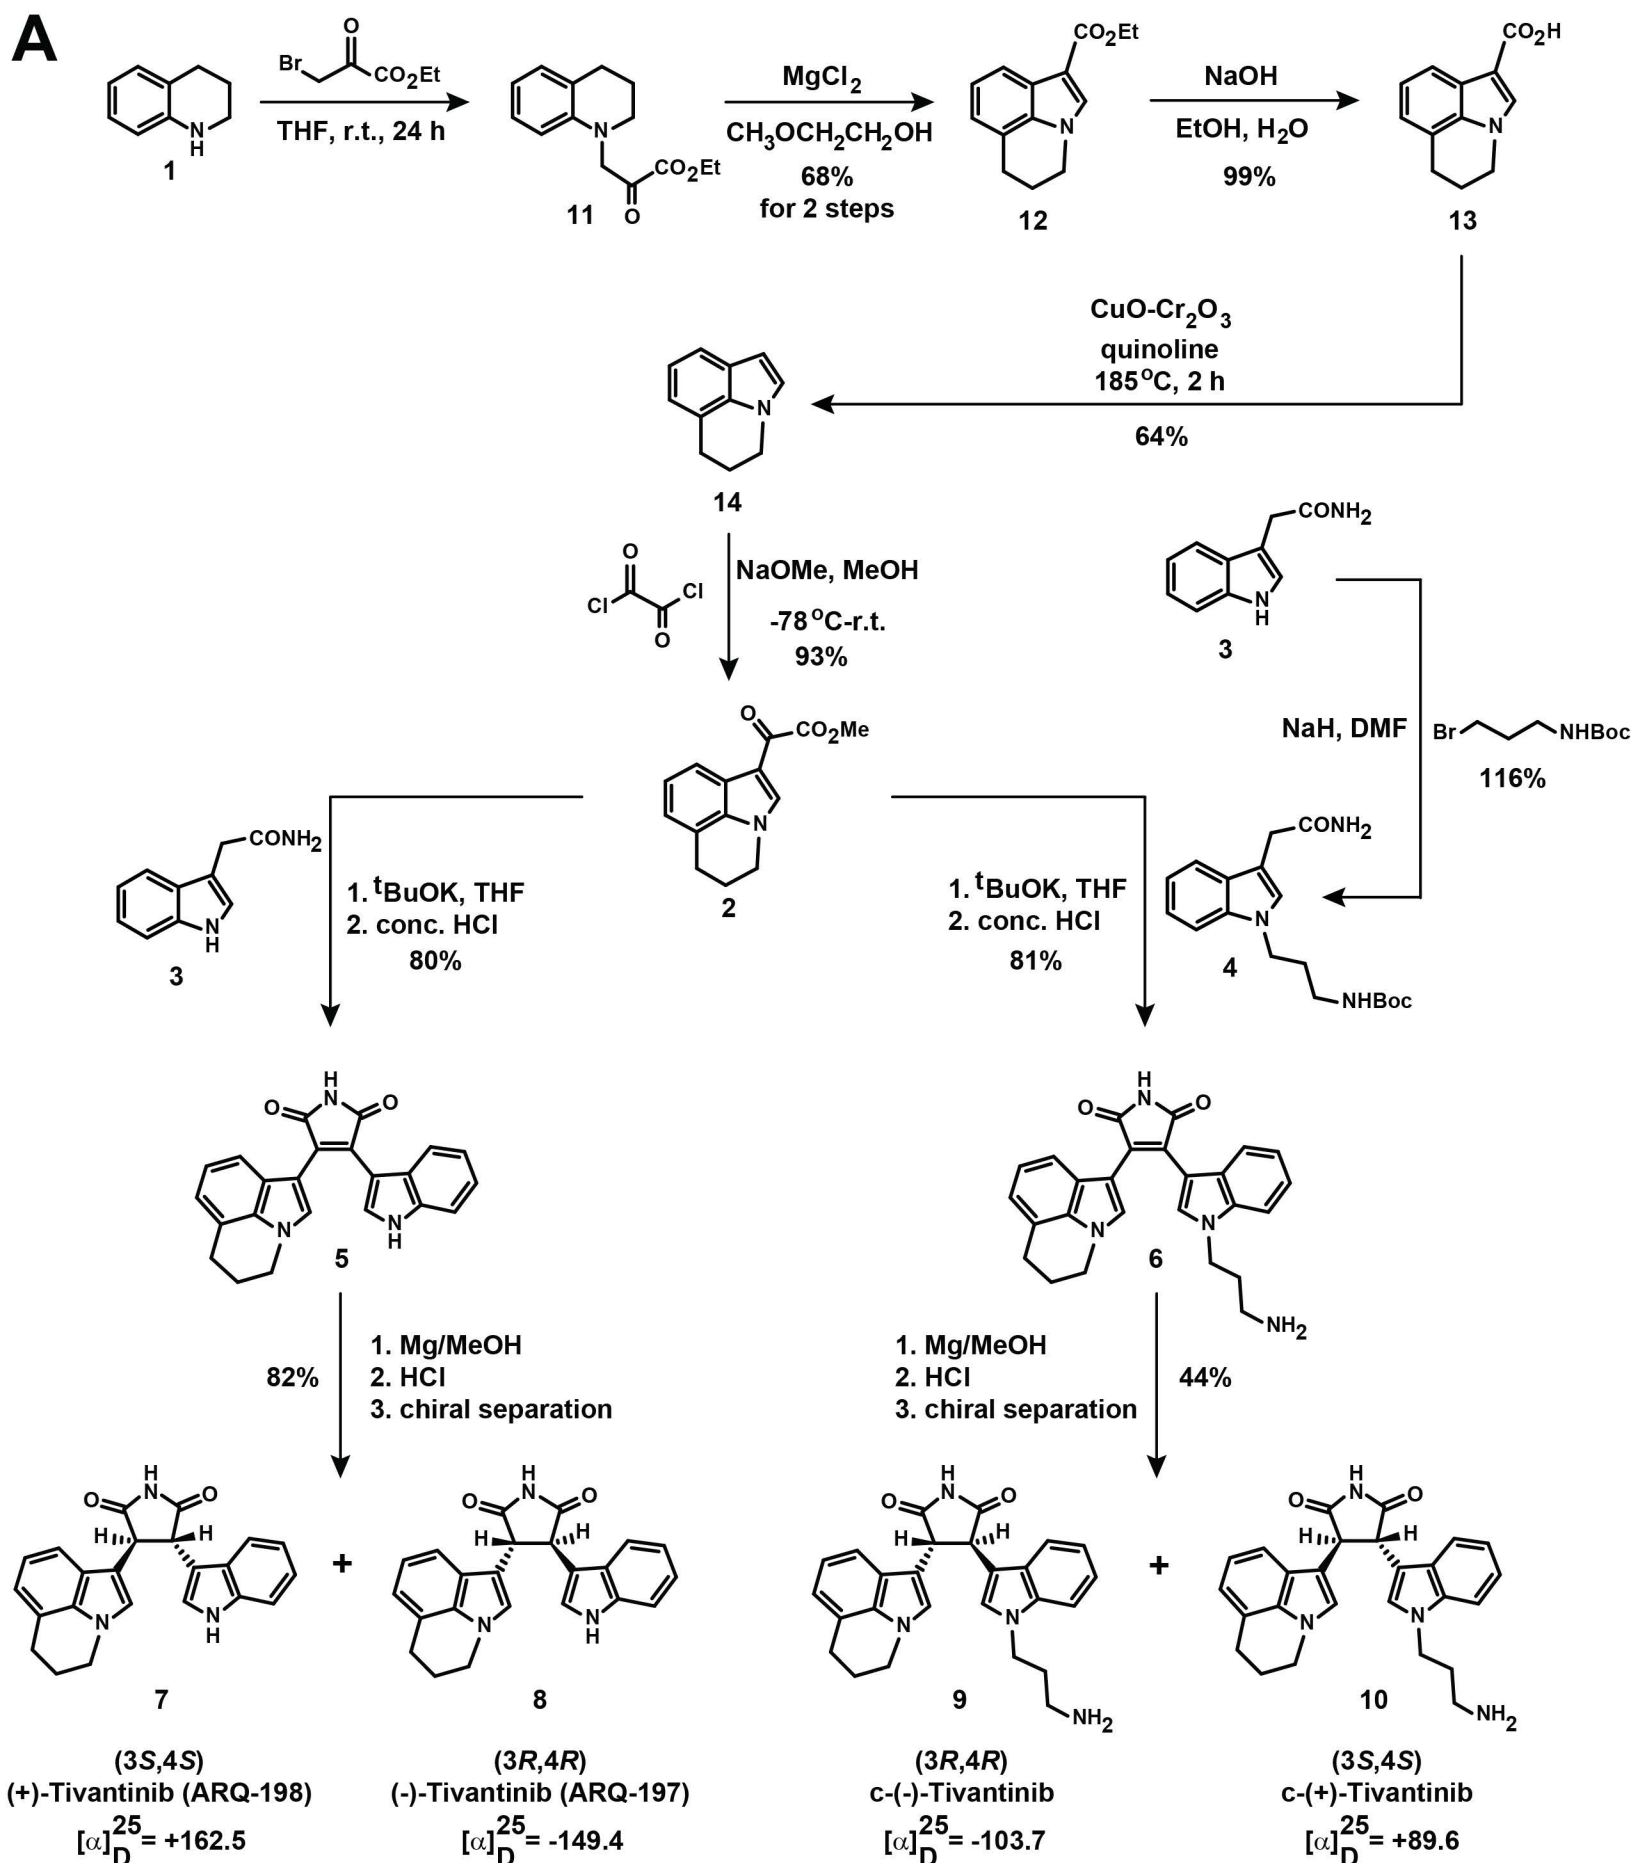

**B**

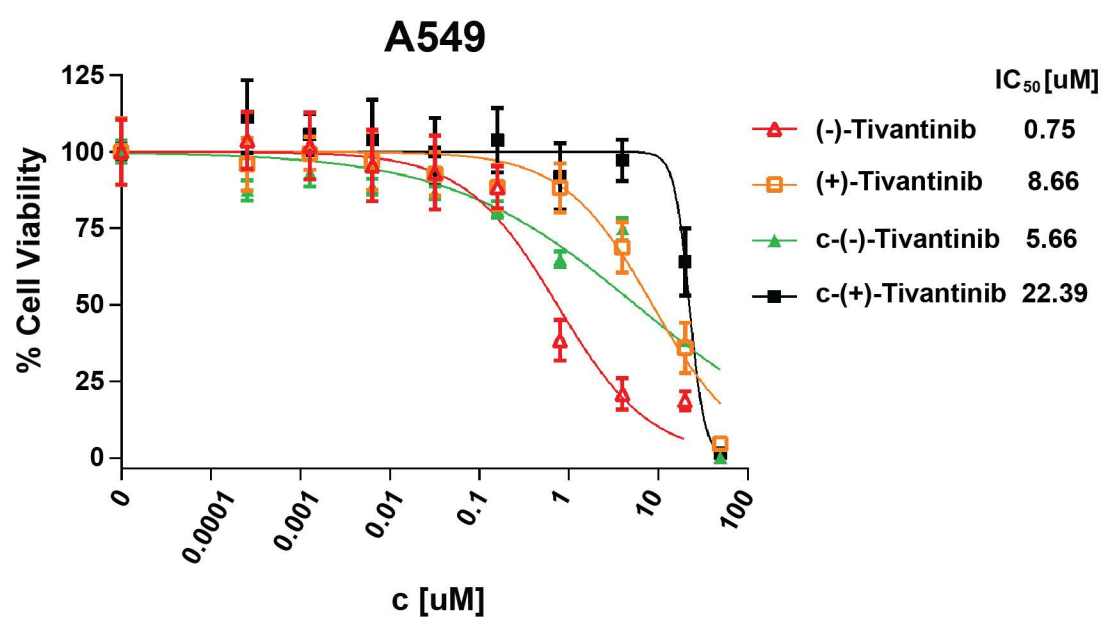

# Remsing Rix et al., Figure S2

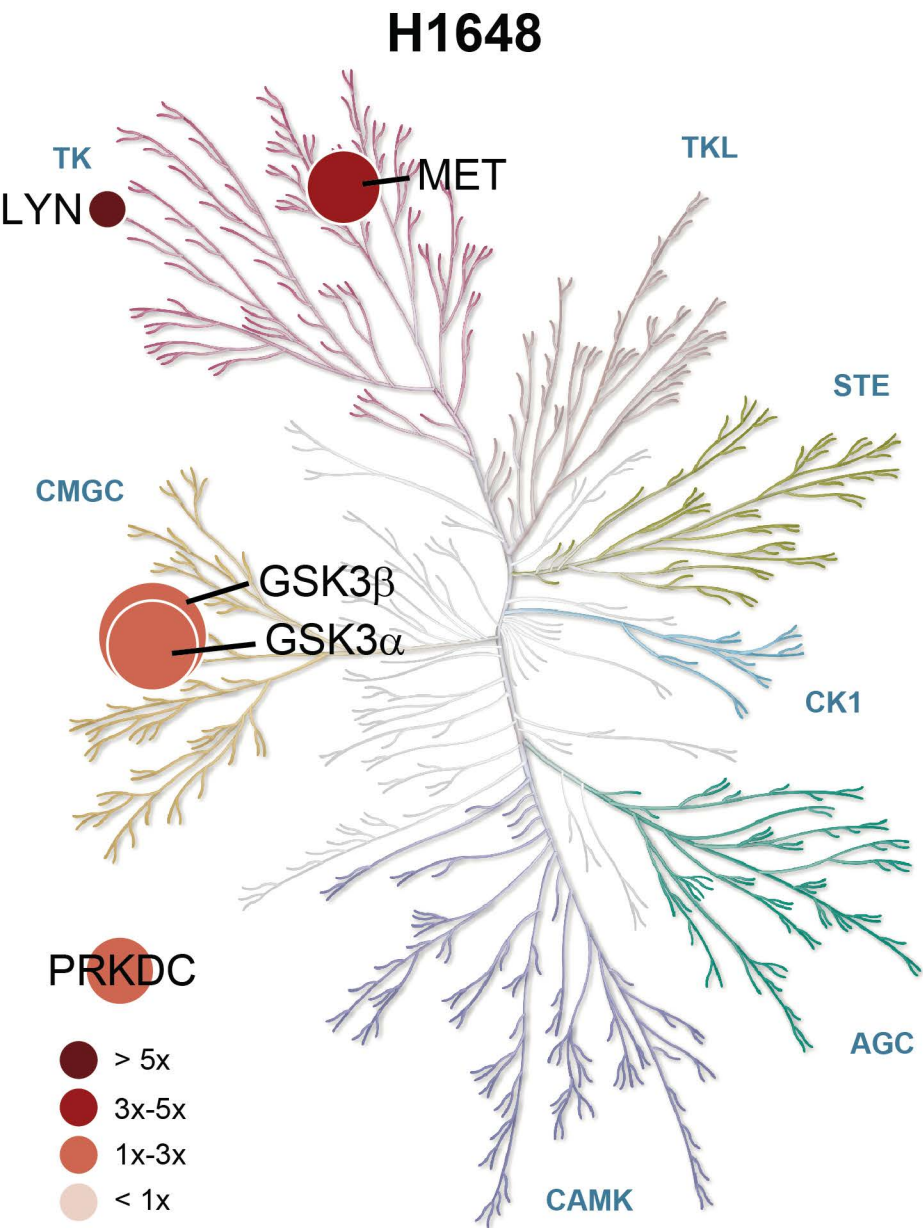

# Remsing Rix et al., Figure S3

## Inhibition of c-MET by (-)-Tivantinib

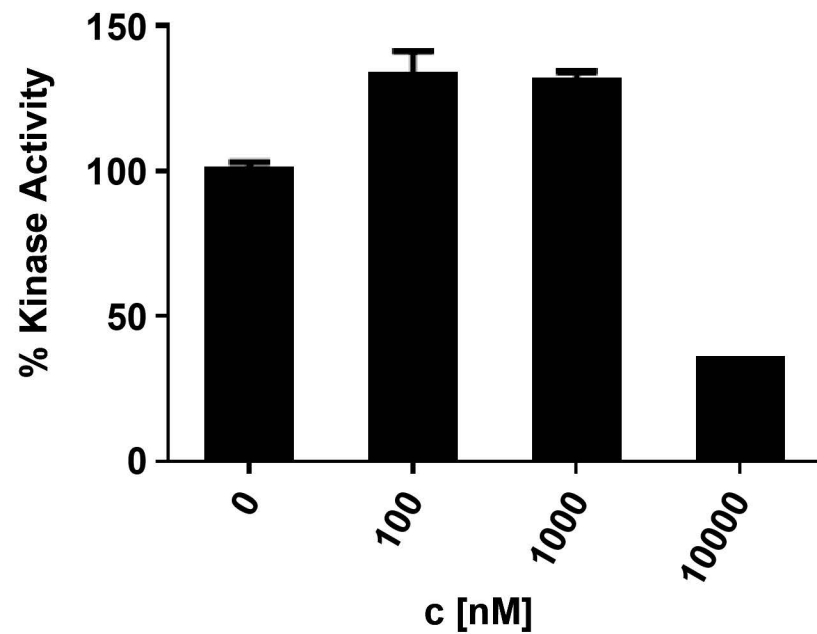

# Remsing Rix et al., Figure S4

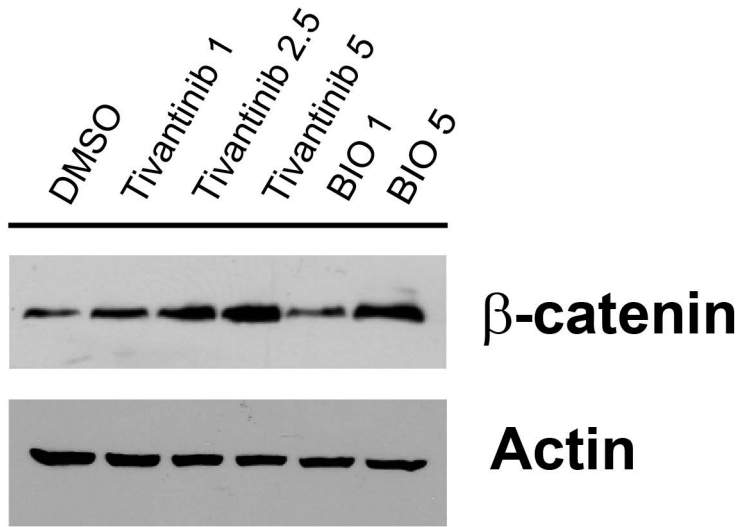

# Remsing Rix et al., Figure S5

**A**

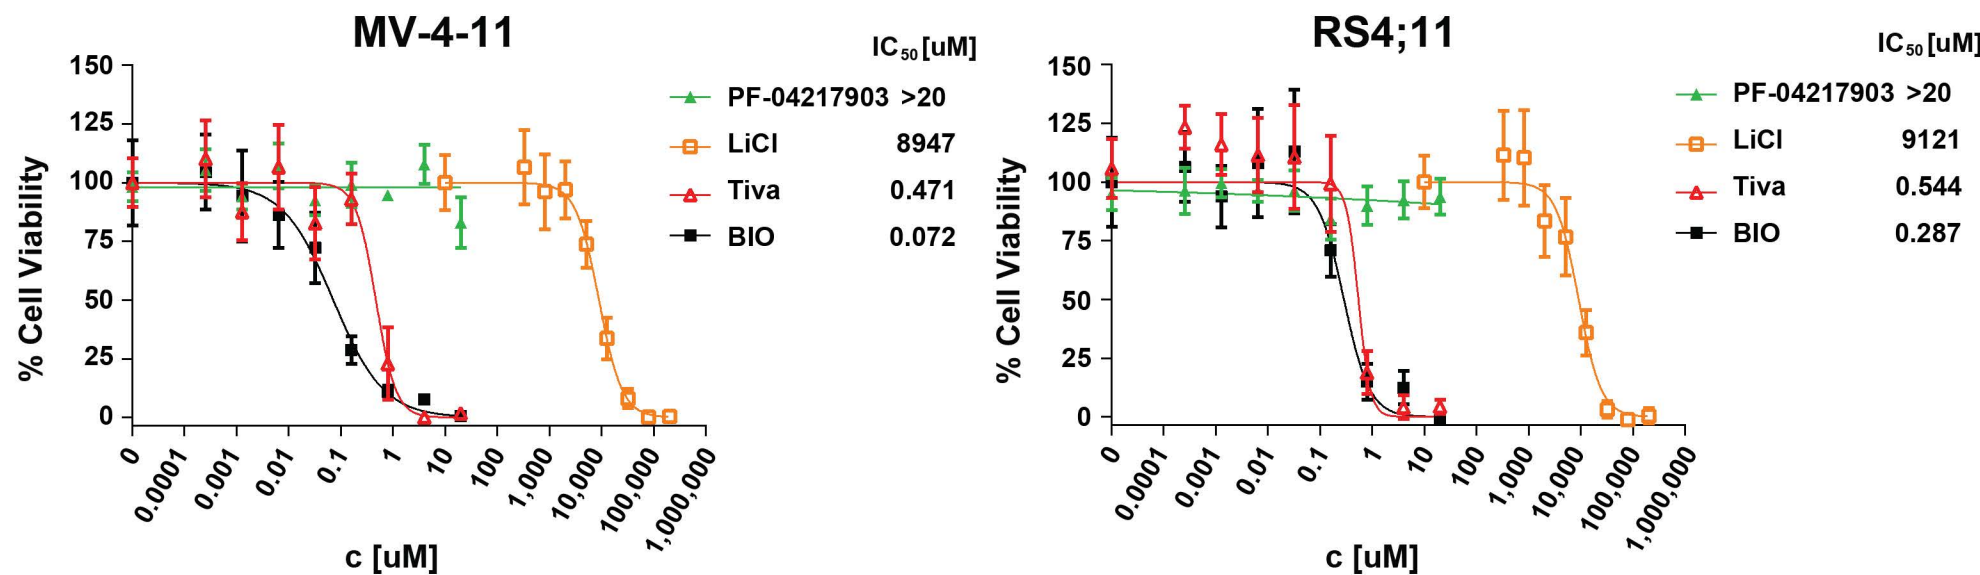

**B**

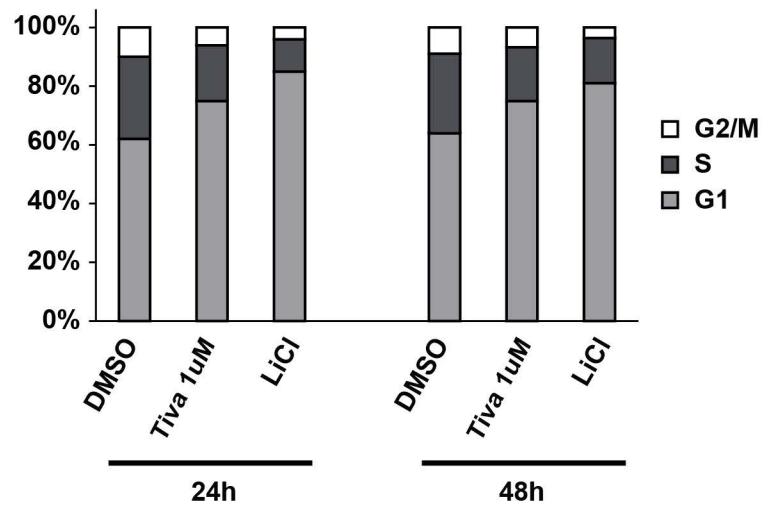

**C**

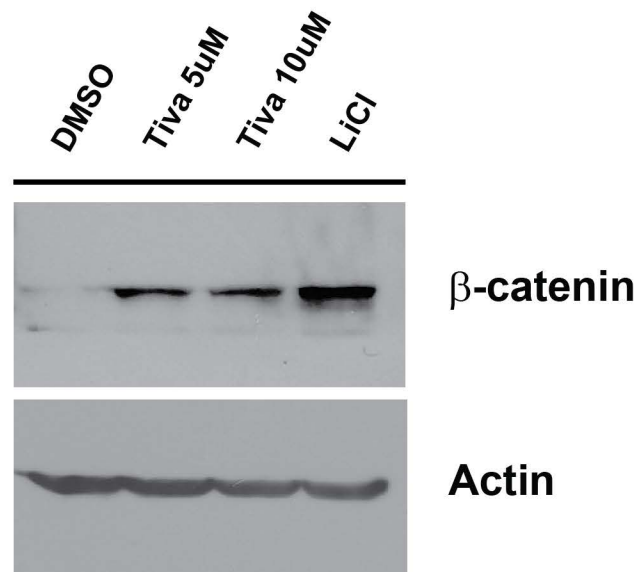

# Remsing Rix et al., Figure S6

## A

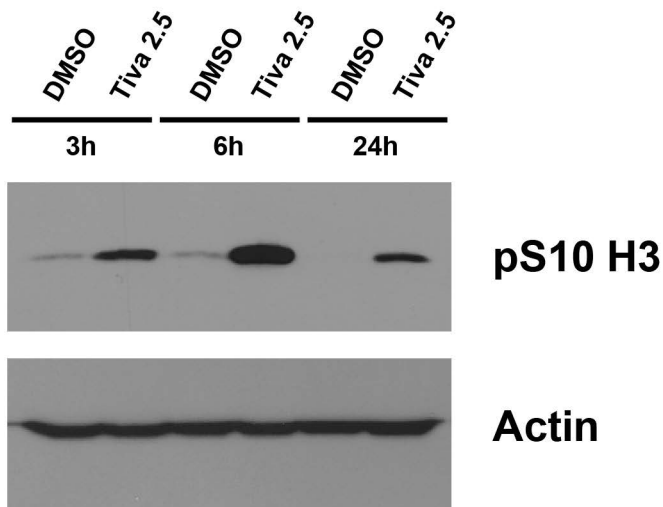

## B

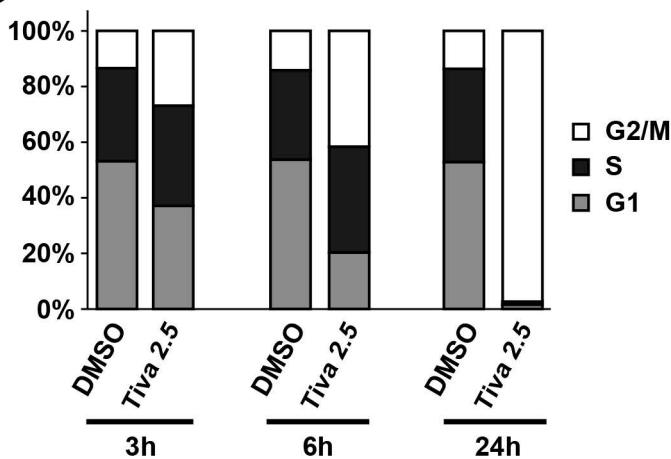

# Remsing Rix et al., Figure S7

**A**

**DMSO**

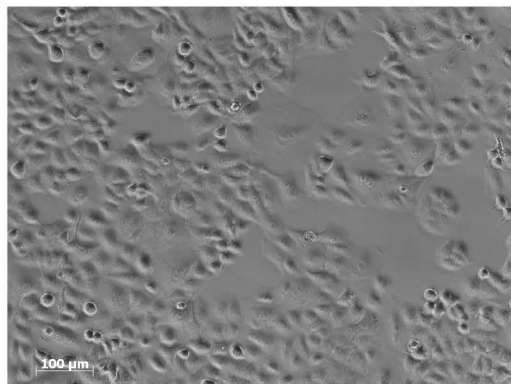

**Tiva 2.5  $\mu\text{M}$**

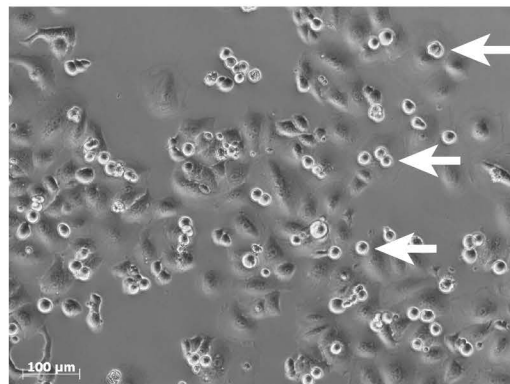

**B**

**NT**

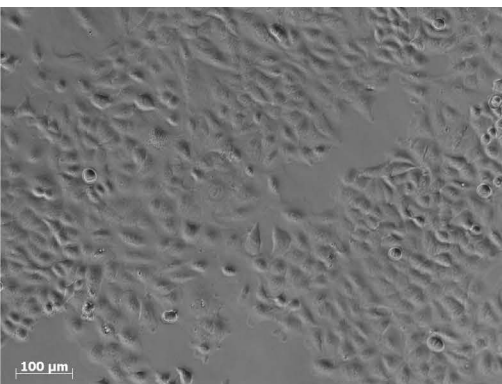

**GSK3 $\alpha$ -1**

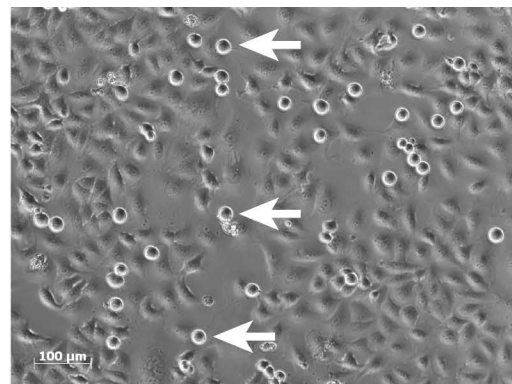

**GSK3 $\beta$ -1**

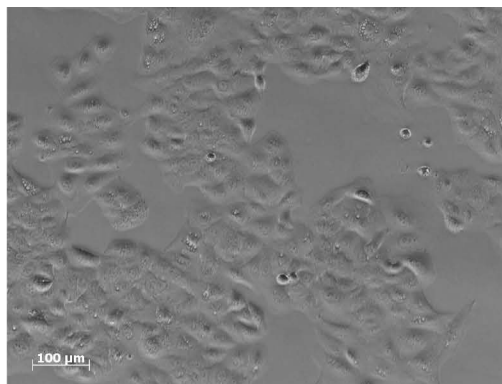

**GSK3 $\alpha$ 1+ $\beta$ 1**

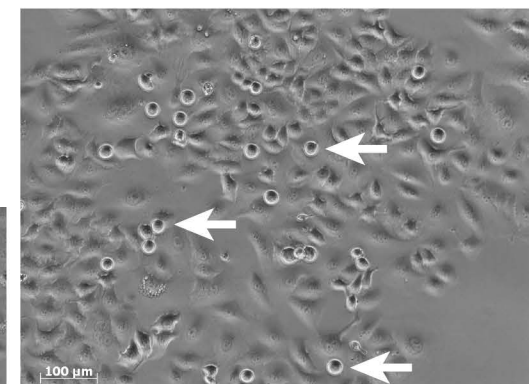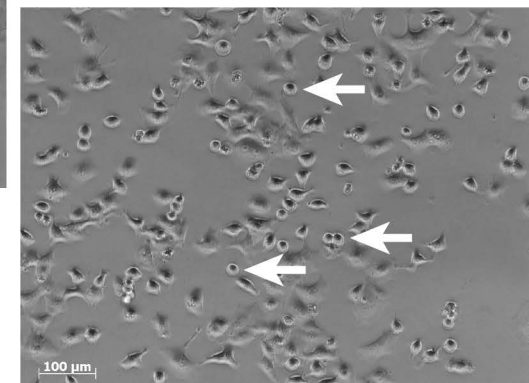

**GSK3 $\alpha$ / $\beta$ -dual-1**

# Remsing Rix et al., Figure S8

**A**

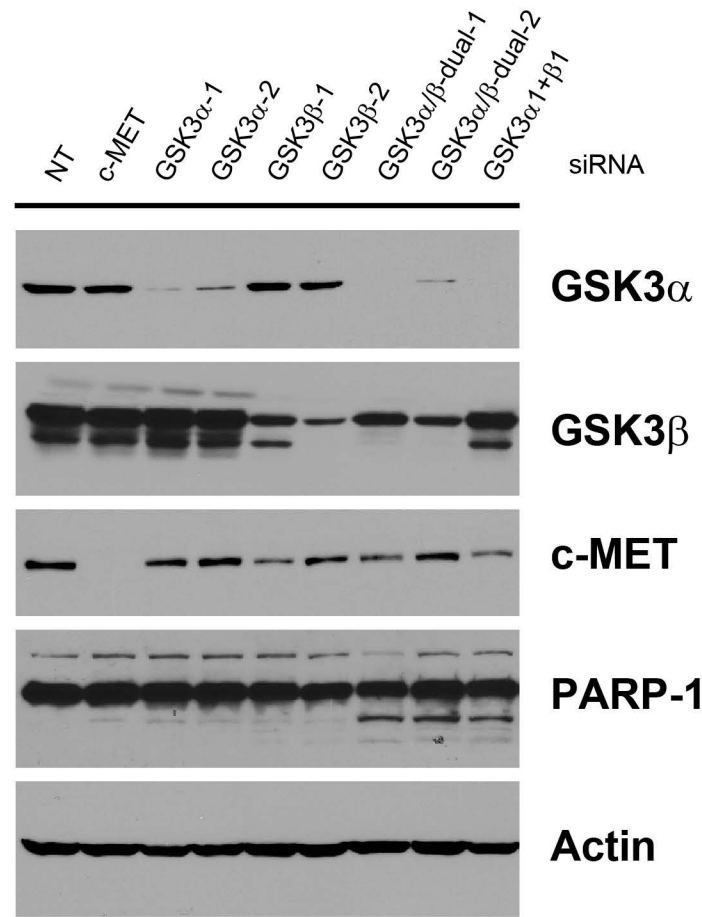

**B**

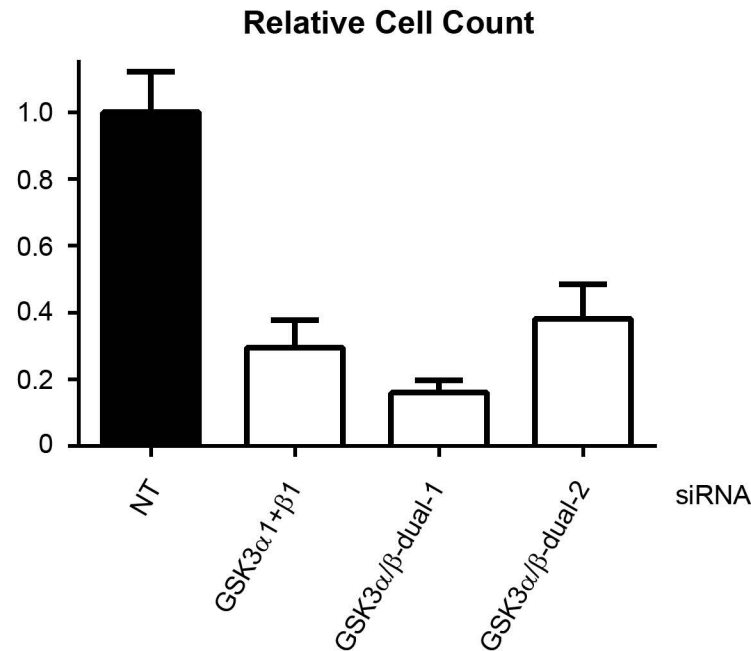

## Remsing Rix et al, Table S1

| Identified Proteins (3028)                                                                 | Accession Number | Molecular Weight | c-(-)-Tiva1 | c-(-)-Tiva2 | c-(+)-Tiva1 | c-(+)-Tiva2 |
|--------------------------------------------------------------------------------------------|------------------|------------------|-------------|-------------|-------------|-------------|
| Spectrin alpha chain, brain OS=Homo sapiens GN=SPTAN1 PE=1 SV=3                            | SPTA2_HUMAN      | 285 kDa          | 173         | 212         | 182         | 200         |
| Myosin-9 OS=Homo sapiens GN=MYH9 PE=1 SV=4                                                 | MYH9_HUMAN       | 227 kDa          | 159         | 130         | 151         | 124         |
| Spectrin beta chain, brain 1 OS=Homo sapiens GN=SPTBN1 PE=1 SV=2                           | SPTB2_HUMAN      | 275 kDa          | 156         | 199         | 152         | 192         |
| Filamin-B OS=Homo sapiens GN=FLNB PE=1 SV=2                                                | FLNB_HUMAN       | 278 kDa          | 96          | 204         | 96          | 195         |
| Myosin-10 OS=Homo sapiens GN=MYH10 PE=1 SV=3                                               | MYH10_HUMAN      | 229 kDa          | 60          | 39          | 61          | 46          |
| Filamin-A OS=Homo sapiens GN=FLNA PE=1 SV=4                                                | FLNA_HUMAN       | 281 kDa          | 55          | 96          | 69          | 82          |
| Unconventional myosin-Ic OS=Homo sapiens GN=MYO1C PE=1 SV=4                                | MYO1C_HUMAN      | 122 kDa          | 38          | 17          | 18          | 19          |
| Actin, aortic smooth muscle OS=Homo sapiens GN=ACTA2 PE=1 SV=1                             | ACTA_HUMAN       | 42 kDa           | 36          | 42          | 38          | 43          |
| Plectin OS=Homo sapiens GN=PLEC PE=1 SV=3                                                  | PLEC_HUMAN       | 532 kDa          | 31          | 46          | 24          | 59          |
| DNA-dependent protein kinase catalytic subunit OS=Homo sapiens GN=PRKDC PE=1 SV=3          | PRKDC_HUMAN      | 469 kDa          | 28          | 2           | 5           | 6           |
| Actin, cytoplasmic 1 OS=Homo sapiens GN=ACTB PE=1 SV=1                                     | ACTB_HUMAN       | 42 kDa           | 27          | 28          | 24          | 26          |
| Unconventional myosin-Ib OS=Homo sapiens GN=MYO1B PE=2 SV=3                                | MYO1B_HUMAN      | 132 kDa          | 26          | 17          | 14          | 23          |
| Alpha-actinin-4 OS=Homo sapiens GN=ACTN4 PE=1 SV=2                                         | ACTN4_HUMAN      | 105 kDa          | 18          | 12          | 22          | 8           |
| Fascin OS=Homo sapiens GN=FSCN1 PE=1 SV=3                                                  | FSCN1_HUMAN      | 55 kDa           | 16          | 23          | 25          | 27          |
| Clathrin heavy chain 1 OS=Homo sapiens GN=CLTC PE=1 SV=5                                   | CLH1_HUMAN       | 192 kDa          | 13          | 14          | 23          | 13          |
| Drebrin OS=Homo sapiens GN=DBN1 PE=1 SV=4                                                  | DREB_HUMAN       | 71 kDa           | 13          | 8           | 6           | 6           |
| Contactin-1 OS=Homo sapiens GN=CNTN1 PE=1 SV=1                                             | CNTN1_HUMAN      | 113 kDa          | 13          | 2           | 7           | 3           |
| Coronin-1C OS=Homo sapiens GN=CORO1C PE=1 SV=1                                             | COR1C_HUMAN      | 53 kDa           | 11          | 14          | 12          | 23          |
| Alpha-actinin-1 OS=Homo sapiens GN=ACTN1 PE=1 SV=2                                         | ACTN1_HUMAN      | 103 kDa          | 11          | 5           | 11          | 9           |
| Unconventional myosin-Ie OS=Homo sapiens GN=MYO1E PE=1 SV=2                                | MYO1E_HUMAN      | 127 kDa          | 11          | 7           | 7           | 6           |
| Histone deacetylase 6 OS=Homo sapiens GN=HDAC6 PE=1 SV=2                                   | HDAC6_HUMAN      | 131 kDa          | 10          | 3           | 10          | 4           |
| Protein flightless-1 homolog OS=Homo sapiens GN=FLII PE=1 SV=2                             | FLII_HUMAN       | 145 kDa          | 10          | 1           | 2           | 5           |
| Unconventional myosin-XVIIa OS=Homo sapiens GN=MYO18A PE=1 SV=3                            | MY18A_HUMAN      | 233 kDa          | 10          | 1           | 1           | 3           |
| Spectrin beta chain, erythrocyte OS=Homo sapiens GN=SPTB PE=1 SV=5                         | SPTB1_HUMAN      | 246 kDa          | 9           | 11          | 9           | 11          |
| Ras GTPase-activating-like protein IQGAP1 OS=Homo sapiens GN=IQGAP1 PE=1 SV=1              | IQGA1_HUMAN      | 189 kDa          | 9           | 12          | 12          | 6           |
| Nucleolin OS=Homo sapiens GN=NCL PE=1 SV=3                                                 | NUCL_HUMAN       | 77 kDa           | 9           | 6           | 12          | 7           |
| Tubulin alpha-1A chain OS=Homo sapiens GN=TUBA1A PE=1 SV=1                                 | TBA1A_HUMAN      | 50 kDa           | 8           | 15          | 9           | 11          |
| Tropomyosin alpha-1 chain OS=Homo sapiens GN=TPM1 PE=1 SV=2                                | TPM1_HUMAN       | 33 kDa           | 8           | 10          | 7           | 12          |
| Myosin-11 OS=Homo sapiens GN=MYH11 PE=1 SV=3                                               | MYH11_HUMAN      | 227 kDa          | 8           | 5           | 6           | 8           |
| Keratin, type II cytoskeletal 7 OS=Homo sapiens GN=KRT7 PE=1 SV=5                          | K2C7_HUMAN       | 51 kDa           | 8           | 5           | 4           | 3           |
| F-actin-capping protein subunit beta OS=Homo sapiens GN=CAPZB PE=1 SV=4                    | CAPZB_HUMAN      | 31 kDa           | 8           | 5           | 6           | 4           |
| Putative beta-actin-like protein 3 OS=Homo sapiens GN=POTEKP PE=5 SV=1                     | ACTBM_HUMAN      | 42 kDa           | 7           | 7           | 10          | 9           |
| Keratin, type II cytoskeletal 8 OS=Homo sapiens GN=KRT8 PE=1 SV=7                          | K2C8_HUMAN       | 54 kDa           | 7           | 6           | 4           | 9           |
| Myosin-14 OS=Homo sapiens GN=MYH14 PE=1 SV=2                                               | MYH14_HUMAN      | 228 kDa          | 7           | 3           | 5           | 5           |
| Glycogen synthase kinase-3 alpha OS=Homo sapiens GN=GSK3A PE=1 SV=2                        | GSK3A_HUMAN      | 51 kDa           | 7           | 7           | 2           | 2           |
| Annexin A2 OS=Homo sapiens GN=ANXA2 PE=1 SV=2                                              | ANXA2_HUMAN      | 39 kDa           | 6           | 17          | 17          | 21          |
| POTE ankyrin domain family member I OS=Homo sapiens GN=POTEI PE=3 SV=1                     | POTEI_HUMAN      | 121 kDa          | 6           | 3           | 4           | 7           |
| Keratin, type I cytoskeletal 18 OS=Homo sapiens GN=KRT18 PE=1 SV=2                         | K1C18_HUMAN      | 48 kDa           | 6           | 8           | 10          | 11          |
| Tubulin beta-2A chain OS=Homo sapiens GN=TUBB2A PE=1 SV=1                                  | TBB2A_HUMAN      | 50 kDa           | 6           | 12          | 6           | 7           |
| NAD(P)H dehydrogenase [quinone] 1 OS=Homo sapiens GN=NQO1 PE=1 SV=1                        | NQO1_HUMAN       | 31 kDa           | 6           | 4           | 7           | 2           |
| ATP-dependent RNA helicase A OS=Homo sapiens GN=DHX9 PE=1 SV=4                             | DHX9_HUMAN       | 141 kDa          | 6           | 2           | 4           | 2           |
| 40S ribosomal protein S3a OS=Homo sapiens GN=RPS3A PE=1 SV=2                               | RS3A_HUMAN       | 30 kDa           | 6           | 0           | 1           | 0           |
| Beta-actin-like protein 2 OS=Homo sapiens GN=ACTBL2 PE=1 SV=2                              | ACTBL_HUMAN      | 42 kDa           | 5           | 5           | 6           | 9           |
| Tropomyosin alpha-4 chain OS=Homo sapiens GN=TPM4 PE=1 SV=3                                | TPM4_HUMAN       | 29 kDa           | 5           | 4           | 6           | 6           |
| 4F2 cell-surface antigen heavy chain OS=Homo sapiens GN=SLC3A2 PE=1 SV=3                   | 4F2_HUMAN        | 68 kDa           | 5           | 8           | 2           | 3           |
| Tropomodulin-3 OS=Homo sapiens GN=TMOD3 PE=1 SV=1                                          | TMOD3_HUMAN      | 40 kDa           | 5           | 2           | 5           | 2           |
| Sarcoplasmic/endoplasmic reticulum calcium ATPase 2 OS=Homo sapiens GN=ATP2A2 PE=1 SV=1    | AT2A2_HUMAN      | 115 kDa          | 5           | 1           | 1           | 0           |
| POTE ankyrin domain family member F OS=Homo sapiens GN=POTEF PE=1 SV=2                     | POTEF_HUMAN      | 121 kDa          | 4           | 2           | 2           | 5           |
| Elongation factor 1-alpha 1 OS=Homo sapiens GN=EEF1A1 PE=1 SV=1                            | EF1A1_HUMAN      | 50 kDa           | 4           | 4           | 5           | 7           |
| Heterogeneous nuclear ribonucleoprotein U OS=Homo sapiens GN=HNRNPU PE=1 SV=6              | HNRPU_HUMAN      | 91 kDa           | 4           | 4           | 5           | 4           |
| Cytoplasmic dynein 1 heavy chain 1 OS=Homo sapiens GN=DYNC1H1 PE=1 SV=5                    | DYHC1_HUMAN      | 532 kDa          | 4           | 0           | 6           | 0           |
| Nucleophosmin OS=Homo sapiens GN=NPM1 PE=1 SV=2                                            | NPM_HUMAN        | 33 kDa           | 4           | 3           | 1           | 3           |
| Unconventional myosin-VI OS=Homo sapiens GN=MYO6 PE=1 SV=4                                 | MYO6_HUMAN       | 150 kDa          | 4           | 1           | 1           | 0           |
| Non-POU domain-containing octamer-binding protein OS=Homo sapiens GN=NONO PE=1 SV=4        | NONO_HUMAN       | 54 kDa           | 4           | 2           | 2           | 0           |
| Glycogen synthase kinase-3 beta OS=Homo sapiens GN=GSK3B PE=1 SV=2                         | GSK3B_HUMAN      | 47 kDa           | 4           | 2           | 1           | 0           |
| Titin OS=Homo sapiens GN=TTN PE=1 SV=4                                                     | TITIN_HUMAN      | 3816 kDa         | 3           | 2           | 3           | 3           |
| Prolow-density lipoprotein receptor-related protein 1 OS=Homo sapiens GN=LRP1 PE=1 SV=2    | LRP1_HUMAN       | 505 kDa          | 3           | 0           | 0           | 0           |
| Tubulin beta-3 chain OS=Homo sapiens GN=TUBB3 PE=1 SV=2                                    | TBB3_HUMAN       | 50 kDa           | 3           | 2           | 3           | 3           |
| Gelsolin OS=Homo sapiens GN=GSLN PE=1 SV=1                                                 | GELS_HUMAN       | 86 kDa           | 3           | 1           | 6           | 2           |
| Guanine nucleotide-binding protein G(i) subunit alpha-1 OS=Homo sapiens GN=GNAI1 PE=1 SV=2 | GNAI1_HUMAN      | 40 kDa           | 3           | 2           | 3           | 3           |
| Tropomyosin beta chain OS=Homo sapiens GN=TPM2 PE=1 SV=1                                   | TPM2_HUMAN       | 33 kDa           | 3           | 2           | 1           | 2           |
| Spectrin beta chain, brain 2 OS=Homo sapiens GN=SPTBN2 PE=1 SV=3                           | SPTN2_HUMAN      | 271 kDa          | 3           | 1           | 3           | 1           |
| LIM domain only protein 7 OS=Homo sapiens GN=LMO7 PE=1 SV=3                                | LMO7_HUMAN       | 193 kDa          | 3           | 0           | 2           | 1           |
| Unconventional myosin-Ia OS=Homo sapiens GN=MYO1A PE=1 SV=1                                | MYO1A_HUMAN      | 118 kDa          | 3           | 2           | 3           | 1           |
| Heterogeneous nuclear ribonucleoprotein M OS=Homo sapiens GN=HNRNPM PE=1 SV=3              | HNRPM_HUMAN      | 78 kDa           | 3           | 0           | 2           | 1           |
| Dystonin OS=Homo sapiens GN=DST PE=1 SV=4                                                  | DYST_HUMAN       | 861 kDa          | 3           | 1           | 0           | 0           |
| Tubulin beta-4A chain OS=Homo sapiens GN=TUBB4A PE=1 SV=2                                  | TBB4A_HUMAN      | 50 kDa           | 3           | 3           | 2           | 0           |
| F-actin-capping protein subunit alpha-1 OS=Homo sapiens GN=CAPZA1 PE=1 SV=3                | CAZA1_HUMAN      | 33 kDa           | 3           | 1           | 2           | 1           |
| Leucine-rich repeat flightless-interacting protein 1 OS=Homo sapiens GN=LRRFIP1 PE=1 SV=2  | LRRF1_HUMAN      | 89 kDa           | 3           | 0           | 3           | 1           |
| Myosin regulatory light chain 12A OS=Homo sapiens GN=MYL12A PE=1 SV=2                      | ML12A_HUMAN      | 20 kDa           | 3           | 0           | 4           | 1           |
| Peroxidasin homolog OS=Homo sapiens GN=PXDN PE=1 SV=2                                      | PXDN_HUMAN       | 165 kDa          | 3           | 0           | 0           | 2           |
| Low-density lipoprotein receptor-related protein 2 OS=Homo sapiens GN=LRP2 PE=1 SV=3       | LRP2_HUMAN       | 522 kDa          | 3           | 0           | 0           | 1           |
| Myosin phosphatase Rho-interacting protein OS=Homo sapiens GN=MPRIP PE=1 SV=3              | MPRIP_HUMAN      | 117 kDa          | 3           | 0           | 1           | 0           |
| Unconventionnal myosin-X OS=Homo sapiens GN=MYO10 PE=1 SV=3                                | MYO10_HUMAN      | 237 kDa          | 3           | 0           | 1           | 0           |
| Sarcoplasmic/endoplasmic reticulum calcium ATPase 1 OS=Homo sapiens GN=ATP2A1 PE=1 SV=1    | AT2A1_HUMAN      | 110 kDa          | 3           | 0           | 2           | 0           |
| Myoferlin OS=Homo sapiens GN=MYOF PE=1 SV=1                                                | MYOF_HUMAN       | 235 kDa          | 2           | 8           | 4           | 10          |
| 78 kDa glucose-regulated protein OS=Homo sapiens GN=HSPA5 PE=1 SV=2                        | GRP78_HUMAN      | 72 kDa           | 2           | 8           | 5           | 7           |
| Heat shock cognate 71 kDa protein OS=Homo sapiens GN=HSPA8 PE=1 SV=1                       | HSP7C_HUMAN      | 71 kDa           | 2           | 8           | 4           | 6           |
| Vimentin OS=Homo sapiens GN=VIM PE=1 SV=4                                                  | VIME_HUMAN       | 54 kDa           | 2           | 8           | 2           | 5           |
| Neuroblast differentiation-associated protein AHNAK OS=Homo sapiens GN=AHNAK PE=1 SV=2     | AHNK_HUMAN       | 629 kDa          | 2           | 4           | 1           | 4           |

|                                                                                                      |             |         |   |   |    |   |
|------------------------------------------------------------------------------------------------------|-------------|---------|---|---|----|---|
| Transitional endoplasmic reticulum ATPase OS=Homo sapiens GN=VCP PE=1 SV=4                           | TERA_HUMAN  | 89 kDa  | 2 | 2 | 5  | 4 |
| 60 kDa heat shock protein, mitochondrial OS=Homo sapiens GN=HSPD1 PE=1 SV=2                          | CH60_HUMAN  | 61 kDa  | 2 | 8 | 3  | 1 |
| Keratin, type II cytoskeletal 1 OS=Homo sapiens GN=KRT1 PE=1 SV=6                                    | K2C1_HUMAN  | 66 kDa  | 2 | 1 | 11 | 0 |
| Heterogeneous nuclear ribonucleoprotein K OS=Homo sapiens GN=HNRNPK PE=1 SV=1                        | HNRPK_HUMAN | 51 kDa  | 2 | 3 | 4  | 2 |
| Unconventional myosin-Va OS=Homo sapiens GN=MYO5A PE=1 SV=2                                          | MYO5A_HUMAN | 215 kDa | 2 | 1 | 2  | 1 |
| Microtubule-actin cross-linking factor 1, isoforms 1/2/3/5 OS=Homo sapiens GN=MACF1 PE=1 SV=4        | MACF1_HUMAN | 838 kDa | 2 | 0 | 2  | 4 |
| Bifunctional glutamate/proline--tRNA ligase OS=Homo sapiens GN=EPRS PE=1 SV=5                        | SYEP_HUMAN  | 171 kDa | 2 | 2 | 4  | 0 |
| Transcriptional regulator ATRX OS=Homo sapiens GN=ATRX PE=1 SV=5                                     | ATRX_HUMAN  | 283 kDa | 2 | 0 | 0  | 0 |
| Tenascin-X OS=Homo sapiens GN=TNXB PE=1 SV=3                                                         | TENX_HUMAN  | 464 kDa | 2 | 1 | 1  | 1 |
| Heterogeneous nuclear ribonucleoproteins A2/B1 OS=Homo sapiens GN=HNRNPA2B1 PE=1 SV=2                | ROA2_HUMAN  | 37 kDa  | 2 | 4 | 1  | 3 |
| 60S ribosomal protein L11 OS=Homo sapiens GN=RPL11 PE=1 SV=2                                         | RL11_HUMAN  | 20 kDa  | 2 | 1 | 3  | 2 |
| 40S ribosomal protein S3 OS=Homo sapiens GN=RP53 PE=1 SV=2                                           | RS3_HUMAN   | 27 kDa  | 2 | 2 | 2  | 0 |
| Dynein heavy chain 3, axonemal OS=Homo sapiens GN=DNAH3 PE=2 SV=1                                    | DYH3_HUMAN  | 471 kDa | 2 | 0 | 0  | 0 |
| 40S ribosomal protein S8 OS=Homo sapiens GN=RP58 PE=1 SV=2                                           | RS8_HUMAN   | 24 kDa  | 2 | 2 | 1  | 3 |
| Epiplakin OS=Homo sapiens GN=EPPK1 PE=1 SV=2                                                         | EPIPL_HUMAN | 556 kDa | 2 | 0 | 0  | 1 |
| Testis- and ovary-specific PAZ domain-containing protein 1 OS=Homo sapiens GN=TOPAZ1 PE=2 SV=3       | TOPZ1_HUMAN | 191 kDa | 2 | 0 | 0  | 0 |
| Trifunctional enzyme subunit alpha, mitochondrial OS=Homo sapiens GN=HADHA PE=1 SV=2                 | ECHA_HUMAN  | 83 kDa  | 2 | 0 | 3  | 1 |
| 40S ribosomal protein S5 OS=Homo sapiens GN=RP55 PE=1 SV=4                                           | RS5_HUMAN   | 23 kDa  | 2 | 0 | 2  | 2 |
| Heterogeneous nuclear ribonucleoprotein A1 OS=Homo sapiens GN=HNRNPA1 PE=1 SV=5                      | ROA1_HUMAN  | 39 kDa  | 2 | 0 | 4  | 1 |
| Kinectin OS=Homo sapiens GN=KTN1 PE=1 SV=1                                                           | KTN1_HUMAN  | 156 kDa | 2 | 1 | 0  | 0 |
| Nucleoprotein TPR OS=Homo sapiens GN=TPR PE=1 SV=3                                                   | TPR_HUMAN   | 267 kDa | 2 | 1 | 1  | 0 |
| Prelamin-A/C OS=Homo sapiens GN=LMNA PE=1 SV=1                                                       | LMNA_HUMAN  | 74 kDa  | 2 | 2 | 0  | 1 |
| Death-associated protein kinase 1 OS=Homo sapiens GN=DAPK1 PE=1 SV=6                                 | DAPK1_HUMAN | 160 kDa | 2 | 0 | 2  | 1 |
| POTE ankyrin domain family member E OS=Homo sapiens GN=POTEE PE=1 SV=3                               | POTEE_HUMAN | 121 kDa | 2 | 0 | 1  | 0 |
| X-linked retinitis pigmentosa GTPase regulator-interacting protein 1 OS=Homo sapiens GN=RPGRIP1 PE=1 | RPGR1_HUMAN | 147 kDa | 2 | 0 | 0  | 0 |
| Mucin-5AC (Fragments) OS=Homo sapiens GN=MUC5AC PE=1 SV=3                                            | MUC5A_HUMAN | 527 kDa | 2 | 0 | 0  | 0 |
| Sushi, nidogen and EGF-like domain-containing protein 1 OS=Homo sapiens GN=SNED1 PE=1 SV=2           | SNED1_HUMAN | 152 kDa | 2 | 0 | 0  | 0 |
| 60S ribosomal protein L7 OS=Homo sapiens GN=RPL7 PE=1 SV=1                                           | RL7_HUMAN   | 29 kDa  | 2 | 2 | 1  | 1 |
| Integrin beta-1 OS=Homo sapiens GN=ITGB1 PE=1 SV=2                                                   | ITB1_HUMAN  | 88 kDa  | 2 | 3 | 1  | 1 |
| Nucleolar RNA helicase 2 OS=Homo sapiens GN=DDX21 PE=1 SV=5                                          | DDX21_HUMAN | 87 kDa  | 2 | 1 | 1  | 0 |
| PRAME family member 22 OS=Homo sapiens GN=PRAMEF22 PE=2 SV=3                                         | PRA22_HUMAN | 55 kDa  | 2 | 1 | 0  | 1 |
| Caskin-1 OS=Homo sapiens GN=CASKIN1 PE=1 SV=1                                                        | CSK1_HUMAN  | 150 kDa | 2 | 0 | 1  | 0 |
| Lysine--tRNA ligase OS=Homo sapiens GN=KARS PE=1 SV=3                                                | SYK_HUMAN   | 68 kDa  | 2 | 0 | 3  | 0 |
| Protein SZT2 OS=Homo sapiens GN=SZT2 PE=2 SV=3                                                       | SZT2_HUMAN  | 378 kDa | 2 | 0 | 0  | 0 |
| Dedicator of cytokinesis protein 9 OS=Homo sapiens GN=DOCK9 PE=1 SV=2                                | DOCK9_HUMAN | 236 kDa | 2 | 0 | 0  | 0 |
| NACHT, LRR and PYD domains-containing protein 4 OS=Homo sapiens GN=NLRP4 PE=1 SV=3                   | NALP4_HUMAN | 113 kDa | 2 | 0 | 0  | 0 |
| Myosin light polypeptide 6 OS=Homo sapiens GN=MYL6 PE=1 SV=2                                         | MYL6_HUMAN  | 17 kDa  | 2 | 1 | 0  | 1 |
| F-actin-capping protein subunit alpha-2 OS=Homo sapiens GN=CAPZA2 PE=1 SV=3                          | CAZA2_HUMAN | 33 kDa  | 2 | 3 | 0  | 1 |
| Zinc phosphodiesterase ELAC protein 2 OS=Homo sapiens GN=ELAC2 PE=1 SV=2                             | RN22_HUMAN  | 92 kDa  | 2 | 0 | 0  | 0 |
| Voltage-dependent P/Q-type calcium channel subunit alpha-1A OS=Homo sapiens GN=CACNA1A PE=1 SV=      | CAC1A_HUMAN | 282 kDa | 2 | 0 | 0  | 0 |
| Sentrin-specific protease 6 OS=Homo sapiens GN=SEN6 PE=1 SV=2                                        | SEN6_HUMAN  | 126 kDa | 2 | 0 | 0  | 0 |
| Regulatory-associated protein of mTOR OS=Homo sapiens GN=RPTOR PE=1 SV=1                             | RPTOR_HUMAN | 149 kDa | 2 | 0 | 0  | 0 |
| A disintegrin and metalloproteinase with thrombospondin motifs 18 OS=Homo sapiens GN=ADAMTS18 PE=    | ATS18_HUMAN | 135 kDa | 2 | 0 | 0  | 0 |
| DNA-directed RNA polymerase III subunit RPC2 OS=Homo sapiens GN=POLR3B PE=1 SV=2                     | RPC2_HUMAN  | 128 kDa | 2 | 0 | 0  | 0 |
| Heterogeneous nuclear ribonucleoproteins C1/C2 OS=Homo sapiens GN=HNRNPC PE=1 SV=4                   | HNRPC_HUMAN | 34 kDa  | 2 | 1 | 1  | 1 |
| E3 ubiquitin-protein ligase RNF213 OS=Homo sapiens GN=RNF213 PE=1 SV=3                               | RN213_HUMAN | 591 kDa | 2 | 1 | 0  | 1 |
| Putative pre-mRNA-splicing factor ATP-dependent RNA helicase DHX15 OS=Homo sapiens GN=DHX15 PE=      | DHX15_HUMAN | 91 kDa  | 2 | 1 | 0  | 1 |
| Fibrillin-1 OS=Homo sapiens GN=FBN1 PE=1 SV=3                                                        | FBN1_HUMAN  | 312 kDa | 2 | 1 | 0  | 0 |
| Polypeptide N-acetylglucosaminyltransferase 4 OS=Homo sapiens GN=GALNT4 PE=1 SV=2                    | GALT4_HUMAN | 67 kDa  | 2 | 0 | 0  | 1 |
| Catenin alpha-1 OS=Homo sapiens GN=CTNNA1 PE=1 SV=1                                                  | CTNA1_HUMAN | 100 kDa | 2 | 0 | 0  | 1 |
| E3 ubiquitin-protein ligase BRE1B OS=Homo sapiens GN=RNF40 PE=1 SV=4                                 | BRE1B_HUMAN | 114 kDa | 2 | 0 | 0  | 1 |
| 26S protease regulatory subunit 6B OS=Homo sapiens GN=PSMC4 PE=1 SV=2                                | PRS6B_HUMAN | 47 kDa  | 2 | 0 | 2  | 0 |
| Pre-mRNA cleavage complex 2 protein Pcf11 OS=Homo sapiens GN=PCF11 PE=1 SV=3                         | PCF11_HUMAN | 173 kDa | 2 | 0 | 0  | 0 |
| Disks large-associated protein 1 OS=Homo sapiens GN=DLGAP1 PE=1 SV=1                                 | DLGP1_HUMAN | 109 kDa | 2 | 0 | 0  | 0 |
| Tubulin alpha-1B chain OS=Homo sapiens GN=TUBA1B PE=1 SV=1                                           | TBA1B_HUMAN | 50 kDa  | 2 | 0 | 1  | 0 |
| Zinc finger MIZ domain-containing protein 1 OS=Homo sapiens GN=ZMIZ1 PE=1 SV=3                       | ZMIZ1_HUMAN | 115 kDa | 2 | 0 | 0  | 1 |
| Protein cramped-like OS=Homo sapiens GN=CRAMP1L PE=1 SV=3                                            | CRML_HUMAN  | 135 kDa | 2 | 0 | 1  | 0 |
| TGF-beta receptor type-1 OS=Homo sapiens GN=TGFBFR1 PE=1 SV=1                                        | TGFR1_HUMAN | 56 kDa  | 2 | 0 | 0  | 0 |
| Vacuolar protein sorting-associated protein 16 homolog OS=Homo sapiens GN=VPS16 PE=1 SV=2            | VPS16_HUMAN | 95 kDa  | 2 | 0 | 0  | 0 |
| Multidrug resistance-associated protein 4 OS=Homo sapiens GN=ABCC4 PE=1 SV=3                         | MRP4_HUMAN  | 150 kDa | 2 | 0 | 0  | 0 |
| Uncharacterized protein C2orf63 OS=Homo sapiens GN=C2orf63 PE=2 SV=3                                 | CB063_HUMAN | 67 kDa  | 2 | 0 | 0  | 0 |
| Putative ATP-dependent RNA helicase DHX30 OS=Homo sapiens GN=DHX30 PE=1 SV=1                         | DHX30_HUMAN | 134 kDa | 2 | 0 | 0  | 0 |
| TRMT1-like protein OS=Homo sapiens GN=TRMT1L PE=1 SV=2                                               | TRM11_HUMAN | 82 kDa  | 2 | 0 | 0  | 0 |
| Lipoxygenase homology domain-containing protein 1 OS=Homo sapiens GN=LOXHD1 PE=2 SV=3                | LOXH1_HUMAN | 222 kDa | 2 | 0 | 0  | 0 |
| Erythrocyte band 7 integral membrane protein OS=Homo sapiens GN=STOM PE=1 SV=3                       | STOM_HUMAN  | 32 kDa  | 2 | 0 | 1  | 0 |
| InaD-like protein OS=Homo sapiens GN=INADL PE=1 SV=3                                                 | INADL_HUMAN | 196 kDa | 2 | 1 | 0  | 0 |
| 60S ribosomal protein L21 OS=Homo sapiens GN=RPL21 PE=1 SV=2                                         | RL21_HUMAN  | 19 kDa  | 2 | 1 | 0  | 0 |
| Nucleosome assembly protein 1-like 1 OS=Homo sapiens GN=NAP1L1 PE=1 SV=1                             | NP1L1_HUMAN | 45 kDa  | 2 | 0 | 1  | 0 |
| E3 ubiquitin-protein ligase SHPRH OS=Homo sapiens GN=SHPRH PE=1 SV=2                                 | SHPRH_HUMAN | 193 kDa | 2 | 0 | 1  | 0 |
| Heterogeneous nuclear ribonucleoprotein D0 OS=Homo sapiens GN=HNRNPD PE=1 SV=1                       | HNRPD_HUMAN | 38 kDa  | 2 | 0 | 0  | 0 |
| AT-rich interactive domain-containing protein 1A OS=Homo sapiens GN=ARID1A PE=1 SV=3                 | ARI1A_HUMAN | 242 kDa | 2 | 0 | 0  | 0 |
| Probable exonuclease mut-7 homolog OS=Homo sapiens GN=EXD3 PE=1 SV=3                                 | MUT7_HUMAN  | 97 kDa  | 2 | 0 | 0  | 0 |
| Zinc finger SWIM domain-containing protein 6 OS=Homo sapiens GN=ZSWIM6 PE=2 SV=2                     | ZSWM6_HUMAN | 133 kDa | 2 | 0 | 0  | 0 |
| Embryonal Fyn-associated substrate OS=Homo sapiens GN=EFS PE=2 SV=1                                  | EFS_HUMAN   | 59 kDa  | 2 | 0 | 0  | 1 |
| Histone deacetylase 1 OS=Homo sapiens GN=HDAC1 PE=1 SV=1                                             | HDAC1_HUMAN | 55 kDa  | 2 | 0 | 0  | 0 |
| NACHT, LRR and PYD domains-containing protein 12 OS=Homo sapiens GN=NLRP12 PE=1 SV=2                 | NAL12_HUMAN | 120 kDa | 2 | 0 | 0  | 0 |
| Probable G-protein coupled receptor 83 OS=Homo sapiens GN=GPR83 PE=2 SV=2                            | GPR83_HUMAN | 48 kDa  | 2 | 0 | 0  | 0 |
| 60S ribosomal protein L14 OS=Homo sapiens GN=RPL14 PE=1 SV=4                                         | RL14_HUMAN  | 23 kDa  | 2 | 0 | 0  | 0 |
| Dolichyl-diphosphooligosaccharide--protein glycosyltransferase 48 kDa subunit OS=Homo sapiens GN=DD  | OST48_HUMAN | 51 kDa  | 2 | 0 | 0  | 0 |
| Forkhead box protein M1 OS=Homo sapiens GN=FOXM1 PE=1 SV=3                                           | FOXM1_HUMAN | 84 kDa  | 2 | 0 | 0  | 0 |
| CCAAT/enhancer-binding protein beta OS=Homo sapiens GN=CEBPB PE=1 SV=2                               | CEBPB_HUMAN | 36 kDa  | 2 | 0 | 0  | 0 |
| HERV-K_16p3.3 provirus ancestral Env polyprotein OS=Homo sapiens PE=2 SV=2                           | ENK14_HUMAN | 55 kDa  | 2 | 0 | 0  | 0 |

|                                                                                                        |              |          |   |    |   |   |
|--------------------------------------------------------------------------------------------------------|--------------|----------|---|----|---|---|
| Uncharacterized protein C21orf62 OS=Homo sapiens GN=C21orf62 PE=1 SV=2                                 | CU062_HUMAN  | 25 kDa   | 2 | 0  | 0 | 0 |
| Zinc finger protein 503 OS=Homo sapiens GN=ZNF503 PE=1 SV=1                                            | ZN503_HUMAN  | 63 kDa   | 2 | 0  | 0 | 0 |
| Histone H1.1 OS=Homo sapiens GN=HIST1H1A PE=1 SV=3                                                     | H11_HUMAN    | 22 kDa   | 2 | 0  | 0 | 0 |
| DnaJ homolog subfamily C member 3 OS=Homo sapiens GN=DNAJC3 PE=1 SV=1                                  | DNJC3_HUMAN  | 58 kDa   | 2 | 0  | 0 | 0 |
| Pyruvate kinase isozymes M1/M2 OS=Homo sapiens GN=PKM2 PE=1 SV=4                                       | KPYM_HUMAN   | 58 kDa   | 1 | 17 | 4 | 6 |
| Nesprin-1 OS=Homo sapiens GN=SYNE1 PE=1 SV=3                                                           | SYNE1_HUMAN  | 1011 kDa | 1 | 2  | 2 | 0 |
| Nebulin OS=Homo sapiens GN=NEB PE=1 SV=4                                                               | NEBU_HUMAN   | 773 kDa  | 1 | 0  | 1 | 0 |
| Mucin-16 OS=Homo sapiens GN=MUC16 PE=1 SV=2                                                            | MUC16_HUMAN  | 2353 kDa | 1 | 0  | 0 | 1 |
| Glyceraldehyde-3-phosphate dehydrogenase OS=Homo sapiens GN=GAPDH PE=1 SV=3                            | G3P_HUMAN    | 36 kDa   | 1 | 7  | 0 | 5 |
| Nesprin-2 OS=Homo sapiens GN=SYNE2 PE=1 SV=3                                                           | SYNE2_HUMAN  | 796 kDa  | 1 | 0  | 1 | 0 |
| Heat shock 70 kDa protein 1-like OS=Homo sapiens GN=HSPA1L PE=1 SV=2                                   | HS71L_HUMAN  | 70 kDa   | 1 | 4  | 3 | 3 |
| Heat shock-related 70 kDa protein 2 OS=Homo sapiens GN=HSPA2 PE=1 SV=1                                 | HSP72_HUMAN  | 70 kDa   | 1 | 2  | 3 | 6 |
| Keratin, type I cytoskeletal 10 OS=Homo sapiens GN=KRT10 PE=1 SV=6                                     | K1C10_HUMAN  | 59 kDa   | 1 | 0  | 5 | 1 |
| Obscurin OS=Homo sapiens GN=OBSCN PE=1 SV=3                                                            | OBSCN_HUMAN  | 868 kDa  | 1 | 1  | 4 | 0 |
| Fibrillin-2 OS=Homo sapiens GN=FBN2 PE=1 SV=3                                                          | FBN2_HUMAN   | 315 kDa  | 1 | 0  | 0 | 1 |
| Fatty acid synthase OS=Homo sapiens GN=FASN PE=1 SV=3                                                  | FAS_HUMAN    | 273 kDa  | 1 | 3  | 3 | 2 |
| U5 small nuclear ribonucleoprotein 200 kDa helicase OS=Homo sapiens GN=SNRNP200 PE=1 SV=2              | U520_HUMAN   | 245 kDa  | 1 | 0  | 0 | 0 |
| 1-phosphatidylinositol 4,5-bisphosphate phosphodiesterase epsilon-1 OS=Homo sapiens GN=PLCE1 PE=1 SV=3 | PLCE1_HUMAN  | 259 kDa  | 1 | 0  | 0 | 0 |
| Centrosomal protein of 290 kDa OS=Homo sapiens GN=CEP290 PE=1 SV=2                                     | CE290_HUMAN  | 290 kDa  | 1 | 0  | 0 | 0 |
| Elongation factor Tu, mitochondrial OS=Homo sapiens GN=TUFM PE=1 SV=2                                  | EFTU_HUMAN   | 50 kDa   | 1 | 1  | 5 | 4 |
| Guanine nucleotide-binding protein G(i)/G(s)/G(t) subunit beta-1 OS=Homo sapiens GN=GNB1 PE=1 SV=3     | GBB1_HUMAN   | 37 kDa   | 1 | 6  | 1 | 4 |
| Aurora kinase A OS=Homo sapiens GN=AURKA PE=1 SV=2                                                     | AURKA_HUMAN  | 46 kDa   | 1 | 1  | 1 | 1 |
| Protein AHNK2 OS=Homo sapiens GN=AHNAK2 PE=1 SV=2                                                      | AHNK2_HUMAN  | 617 kDa  | 1 | 0  | 1 | 1 |
| Laminin subunit alpha-5 OS=Homo sapiens GN=LAMA5 PE=1 SV=8                                             | LAMA5_HUMAN  | 400 kDa  | 1 | 0  | 2 | 0 |
| NF-X1-type zinc finger protein NFXL1 OS=Homo sapiens GN=NFXL1 PE=1 SV=2                                | NFXL1_HUMAN  | 101 kDa  | 1 | 1  | 0 | 0 |
| Probable E3 ubiquitin-protein ligase HERC1 OS=Homo sapiens GN=HERC1 PE=1 SV=2                          | HERC1_HUMAN  | 532 kDa  | 1 | 0  | 0 | 0 |
| Talin-1 OS=Homo sapiens GN=TLN1 PE=1 SV=3                                                              | TLN1_HUMAN   | 270 kDa  | 1 | 0  | 0 | 1 |
| Dynein heavy chain 14, axonemal OS=Homo sapiens GN=DNAH14 PE=2 SV=3                                    | DYH14_HUMAN  | 400 kDa  | 1 | 0  | 0 | 0 |
| Small subunit processome component 20 homolog OS=Homo sapiens GN=UTP20 PE=1 SV=3                       | UTP20_HUMAN  | 318 kDa  | 1 | 0  | 0 | 0 |
| Hemicentin-1 OS=Homo sapiens GN=HMCN1 PE=1 SV=2                                                        | HMCN1_HUMAN  | 613 kDa  | 1 | 0  | 0 | 0 |
| Zinc finger homeobox protein 3 OS=Homo sapiens GN=ZFXH3 PE=1 SV=2                                      | ZFXH3_HUMAN  | 404 kDa  | 1 | 0  | 0 | 0 |
| Vacuolar protein sorting-associated protein 13B OS=Homo sapiens GN=VPS13B PE=1 SV=2                    | VP13B_HUMAN  | 449 kDa  | 1 | 0  | 0 | 0 |
| 72 kDa inositol polyphosphate 5-phosphatase OS=Homo sapiens GN=INPP5E PE=1 SV=2                        | INP5E_HUMAN  | 70 kDa   | 1 | 0  | 1 | 1 |
| Ryanodine receptor 3 OS=Homo sapiens GN=RyR3 PE=1 SV=3                                                 | RyR3_HUMAN   | 552 kDa  | 1 | 0  | 0 | 0 |
| Piezo-type mechanosensitive ion channel component 2 OS=Homo sapiens GN=PIEZO2 PE=2 SV=2                | PIE22_HUMAN  | 318 kDa  | 1 | 1  | 0 | 0 |
| Microtubule-associated protein 1B OS=Homo sapiens GN=MAP1B PE=1 SV=2                                   | MAP1B_HUMAN  | 271 kDa  | 1 | 0  | 0 | 0 |
| Kalirin OS=Homo sapiens GN=KALRN PE=1 SV=2                                                             | KALRN_HUMAN  | 340 kDa  | 1 | 0  | 0 | 0 |
| Protein FAM135A OS=Homo sapiens GN=FAM135A PE=1 SV=2                                                   | F135A_HUMAN  | 170 kDa  | 1 | 1  | 0 | 0 |
| Transcriptional repressor NF-X1 OS=Homo sapiens GN=NFX1 PE=1 SV=2                                      | NFX1_HUMAN   | 124 kDa  | 1 | 0  | 0 | 0 |
| Dynein heavy chain 17, axonemal OS=Homo sapiens GN=DNAH17 PE=2 SV=2                                    | DYH17_HUMAN  | 512 kDa  | 1 | 0  | 0 | 0 |
| Dynein heavy chain 7, axonemal OS=Homo sapiens GN=DNAH7 PE=1 SV=2                                      | DYH7_HUMAN   | 461 kDa  | 1 | 0  | 0 | 0 |
| Serine protease inhibitor Kazal-type 5 OS=Homo sapiens GN=SPINK5 PE=1 SV=2                             | ISK5_HUMAN   | 121 kDa  | 1 | 0  | 0 | 0 |
| Nuclear receptor corepressor 2 OS=Homo sapiens GN=NCOR2 PE=1 SV=2                                      | NCOR2_HUMAN  | 275 kDa  | 1 | 0  | 0 | 0 |
| Coiled-coil domain-containing protein 150 OS=Homo sapiens GN=CCDC150 PE=2 SV=2                         | CC150_HUMAN  | 129 kDa  | 1 | 0  | 0 | 0 |
| RNA-binding protein FUS OS=Homo sapiens GN=FUS PE=1 SV=1                                               | FUS_HUMAN    | 53 kDa   | 1 | 2  | 2 | 2 |
| 60S ribosomal protein L3 OS=Homo sapiens GN=RPL3 PE=1 SV=2                                             | RL3_HUMAN    | 46 kDa   | 1 | 1  | 1 | 1 |
| Rho guanine nucleotide exchange factor 10 OS=Homo sapiens GN=ARHGEF10 PE=1 SV=4                        | ARHGA_HUMAN  | 152 kDa  | 1 | 0  | 1 | 0 |
| Uncharacterized protein C17orf77 OS=Homo sapiens GN=C17orf77 PE=2 SV=2                                 | CQ077_HUMAN  | 26 kDa   | 1 | 0  | 0 | 1 |
| POTE ankyrin domain family member J OS=Homo sapiens GN=POTEJ PE=3 SV=1                                 | POTEJ_HUMAN  | 117 kDa  | 1 | 0  | 0 | 2 |
| Bromodomain and WD repeat-containing protein 1 OS=Homo sapiens GN=BRWD1 PE=1 SV=4                      | BRWD1_HUMAN  | 263 kDa  | 1 | 0  | 0 | 0 |
| Ubiquitin carboxyl-terminal hydrolase 35 OS=Homo sapiens GN=USP35 PE=1 SV=3                            | UBP35_HUMAN  | 113 kDa  | 1 | 0  | 2 | 0 |
| Nucleosome-remodeling factor subunit BPTF OS=Homo sapiens GN=BPTF PE=1 SV=3                            | BPTF_HUMAN   | 338 kDa  | 1 | 0  | 1 | 0 |
| Microtubule-associated serine/threonine-protein kinase 1 OS=Homo sapiens GN=MAST1 PE=1 SV=2            | MAST1_HUMAN  | 171 kDa  | 1 | 0  | 0 | 0 |
| Stabilin-1 OS=Homo sapiens GN=STAB1 PE=1 SV=3                                                          | STAB1_HUMAN  | 275 kDa  | 1 | 0  | 0 | 0 |
| Zinc finger protein 469 OS=Homo sapiens GN=ZNF469 PE=1 SV=3                                            | ZN469_HUMAN  | 410 kDa  | 1 | 0  | 0 | 0 |
| Uncharacterized protein C9orf43 OS=Homo sapiens GN=C9orf43 PE=1 SV=1                                   | CI043_HUMAN  | 52 kDa   | 1 | 0  | 0 | 0 |
| Neuroblastoma-amplified sequence OS=Homo sapiens GN=NBAS PE=1 SV=2                                     | NBAS_HUMAN   | 269 kDa  | 1 | 0  | 0 | 0 |
| Disheveled-associated activator of morphogenesis 2 OS=Homo sapiens GN=DAAM2 PE=2 SV=3                  | DAAM2_HUMAN  | 124 kDa  | 1 | 0  | 0 | 0 |
| Tropomyosin alpha-3 chain OS=Homo sapiens GN=TPM3 PE=1 SV=1                                            | TPM3_HUMAN   | 33 kDa   | 1 | 2  | 2 | 2 |
| 60S acidic ribosomal protein P0-like OS=Homo sapiens GN=RPLP0 PE=5 SV=1                                | RLA0L_HUMAN  | 34 kDa   | 1 | 1  | 3 | 2 |
| X-ray repair cross-complementing protein 5 OS=Homo sapiens GN=XRCC5 PE=1 SV=3                          | XRCC5_HUMAN  | 83 kDa   | 1 | 1  | 3 | 2 |
| Importin subunit beta-1 OS=Homo sapiens GN=KPXB1 PE=1 SV=2                                             | IMB1_HUMAN   | 97 kDa   | 1 | 2  | 1 | 1 |
| Centromere-associated protein E OS=Homo sapiens GN=CENPE PE=1 SV=2                                     | CENPE_HUMAN  | 316 kDa  | 1 | 0  | 1 | 2 |
| Ryanodine receptor 2 OS=Homo sapiens GN=RyR2 PE=1 SV=3                                                 | RyR2_HUMAN   | 565 kDa  | 1 | 2  | 1 | 0 |
| Splicing factor, proline- and glutamine-rich OS=Homo sapiens GN=SFPQ PE=1 SV=2                         | SFPQ_HUMAN   | 76 kDa   | 1 | 0  | 3 | 1 |
| Supervillin OS=Homo sapiens GN=SVIL PE=1 SV=2                                                          | SVIL_HUMAN   | 248 kDa  | 1 | 1  | 1 | 0 |
| Terminal uridylyltransferase 7 OS=Homo sapiens GN=ZCCHC6 PE=1 SV=1                                     | TUT7_HUMAN   | 171 kDa  | 1 | 2  | 0 | 1 |
| MAX gene-associated protein OS=Homo sapiens GN=MGA PE=1 SV=2                                           | MGAP_HUMAN   | 332 kDa  | 1 | 1  | 0 | 0 |
| Protein PRRC2C OS=Homo sapiens GN=PRRC2C PE=1 SV=4                                                     | PRC2C_HUMAN  | 317 kDa  | 1 | 0  | 0 | 0 |
| UPF0258 protein KIAA1024 OS=Homo sapiens GN=KIAA1024 PE=2 SV=3                                         | K1024_HUMAN  | 103 kDa  | 1 | 0  | 0 | 0 |
| Talin-2 OS=Homo sapiens GN=TLN2 PE=1 SV=4                                                              | TLN2_HUMAN   | 272 kDa  | 1 | 0  | 1 | 0 |
| Serine/threonine-protein kinase ATR OS=Homo sapiens GN=ATR PE=1 SV=3                                   | ATR_HUMAN    | 301 kDa  | 1 | 1  | 0 | 0 |
| Probable phospholipid-transporting ATPase VA OS=Homo sapiens GN=ATP10A PE=2 SV=2                       | AT10A_HUMAN  | 168 kDa  | 1 | 0  | 0 | 0 |
| Actin-binding LIM protein 1 OS=Homo sapiens GN=ABLIM1 PE=1 SV=3                                        | ABLIM1_HUMAN | 88 kDa   | 1 | 0  | 0 | 0 |
| Zinc finger protein 235 OS=Homo sapiens GN=ZNF235 PE=2 SV=3                                            | ZN235_HUMAN  | 84 kDa   | 1 | 0  | 0 | 0 |
| Keratin-associated protein 5-1 OS=Homo sapiens GN=KRTAP5-1 PE=2 SV=1                                   | KRA51_HUMAN  | 24 kDa   | 1 | 0  | 0 | 0 |
| Slit homolog 2 protein OS=Homo sapiens GN=SLIT2 PE=1 SV=1                                              | SLIT2_HUMAN  | 170 kDa  | 1 | 0  | 0 | 0 |
| Peptidyl-glycine alpha-amidating monooxygenase OS=Homo sapiens GN=PAM PE=1 SV=2                        | AMD_HUMAN    | 108 kDa  | 1 | 0  | 0 | 0 |
| Piwi-like protein 4 OS=Homo sapiens GN=PIWIL4 PE=2 SV=2                                                | PIWL4_HUMAN  | 97 kDa   | 1 | 0  | 0 | 0 |
| SET-binding protein OS=Homo sapiens GN=SETBP1 PE=1 SV=3                                                | SETBP_HUMAN  | 175 kDa  | 1 | 0  | 0 | 0 |
| GREB1-like protein OS=Homo sapiens GN=GREB1L PE=2 SV=2                                                 | GRB1L_HUMAN  | 214 kDa  | 1 | 0  | 0 | 0 |
| 60S ribosomal protein L10a OS=Homo sapiens GN=RPL10A PE=1 SV=2                                         | RL10A_HUMAN  | 25 kDa   | 1 | 1  | 2 | 1 |

|                                                                                                         |              |         |   |   |   |   |
|---------------------------------------------------------------------------------------------------------|--------------|---------|---|---|---|---|
| AP-1 complex subunit beta-1 OS=Homo sapiens GN=AP1B1 PE=1 SV=2                                          | AP1B1_HUMAN  | 105 kDa | 1 | 2 | 1 | 1 |
| Putative tropomyosin alpha-3 chain-like protein OS=Homo sapiens PE=5 SV=2                               | TPM3L_HUMAN  | 26 kDa  | 1 | 1 | 1 | 2 |
| Probable carboxypeptidase X1 OS=Homo sapiens GN=CPXM1 PE=2 SV=2                                         | CPXM1_HUMAN  | 82 kDa  | 1 | 1 | 1 | 1 |
| RecQ-mediated genome instability protein 1 OS=Homo sapiens GN=RMI1 PE=1 SV=3                            | RMI1_HUMAN   | 70 kDa  | 1 | 1 | 0 | 1 |
| X-ray repair cross-complementing protein 6 OS=Homo sapiens GN=XRCC6 PE=1 SV=2                           | XRCC6_HUMAN  | 70 kDa  | 1 | 3 | 1 | 0 |
| Inositol 1,4,5-trisphosphate receptor type 1 OS=Homo sapiens GN=ITPR1 PE=1 SV=2                         | ITPR1_HUMAN  | 314 kDa | 1 | 1 | 0 | 0 |
| Putative Polycomb group protein ASXL2 OS=Homo sapiens GN=ASXL2 PE=1 SV=1                                | ASXL2_HUMAN  | 154 kDa | 1 | 2 | 0 | 2 |
| Aspartyl/asparaginyl beta-hydroxylase OS=Homo sapiens GN=ASPH PE=1 SV=3                                 | ASPH_HUMAN   | 86 kDa  | 1 | 0 | 0 | 2 |
| Ribosome-binding protein 1 OS=Homo sapiens GN=RRBP1 PE=1 SV=4                                           | RRBP1_HUMAN  | 152 kDa | 1 | 1 | 3 | 0 |
| Protein Wnt-5b OS=Homo sapiens GN=WNT5B PE=2 SV=2                                                       | WNT5B_HUMAN  | 40 kDa  | 1 | 1 | 0 | 1 |
| Radial spoke head protein 4 homolog A OS=Homo sapiens GN=RSPH4A PE=1 SV=1                               | RSH4A_HUMAN  | 81 kDa  | 1 | 0 | 1 | 1 |
| Translational activator GCN1 OS=Homo sapiens GN=GCN1L1 PE=1 SV=6                                        | GCN1L_HUMAN  | 293 kDa | 1 | 1 | 3 | 0 |
| Envoplakin OS=Homo sapiens GN=EVPL PE=1 SV=3                                                            | EVPL_HUMAN   | 232 kDa | 1 | 1 | 0 | 1 |
| Protein MCM10 homolog OS=Homo sapiens GN=MCM10 PE=1 SV=2                                                | MCM10_HUMAN  | 98 kDa  | 1 | 0 | 0 | 0 |
| Ankyrin repeat domain-containing protein 36A OS=Homo sapiens GN=ANKRD36 PE=2 SV=3                       | AN36A_HUMAN  | 217 kDa | 1 | 1 | 0 | 1 |
| Neurogenic locus notch homolog protein 4 OS=Homo sapiens GN=NOTCH4 PE=1 SV=2                            | NOTC4_HUMAN  | 210 kDa | 1 | 1 | 1 | 0 |
| 40S ribosomal protein S7 OS=Homo sapiens GN=RPS7 PE=1 SV=1                                              | RS7_HUMAN    | 22 kDa  | 1 | 0 | 2 | 0 |
| Centromere protein F OS=Homo sapiens GN=CENPF PE=1 SV=2                                                 | CENPF_HUMAN  | 368 kDa | 1 | 0 | 0 | 1 |
| Leucine-rich repeat-containing protein 59 OS=Homo sapiens GN=LRC59 PE=1 SV=1                            | LRC59_HUMAN  | 35 kDa  | 1 | 0 | 0 | 2 |
| Sodium/potassium-transporting ATPase subunit alpha-1 OS=Homo sapiens GN=ATP1A1 PE=1 SV=1                | AT1A1_HUMAN  | 113 kDa | 1 | 0 | 0 | 4 |
| Piwi-like protein 3 OS=Homo sapiens GN=PIWIL3 PE=2 SV=2                                                 | PIWIL3_HUMAN | 101 kDa | 1 | 0 | 1 | 0 |
| A disintegrin and metalloproteinase with thrombospondin motifs 14 OS=Homo sapiens GN=ADAMTS14 PE=1 SV=1 | ATS14_HUMAN  | 134 kDa | 1 | 0 | 0 | 0 |
| GON-4-like protein OS=Homo sapiens GN=GON4L PE=1 SV=1                                                   | GON4L_HUMAN  | 249 kDa | 1 | 0 | 0 | 1 |
| Uncharacterized protein KIAA1671 OS=Homo sapiens GN=KIAA1671 PE=1 SV=2                                  | K1671_HUMAN  | 197 kDa | 1 | 0 | 0 | 1 |
| Calcium-dependent secretion activator 1 OS=Homo sapiens GN=CADPS PE=1 SV=3                              | CAPS1_HUMAN  | 153 kDa | 1 | 0 | 0 | 1 |
| Mucin-19 OS=Homo sapiens GN=MUC19 PE=1 SV=2                                                             | MUC19_HUMAN  | 598 kDa | 1 | 0 | 0 | 0 |
| Cleavage stimulation factor subunit 3 OS=Homo sapiens GN=CSTF3 PE=1 SV=1                                | CSTF3_HUMAN  | 83 kDa  | 1 | 0 | 0 | 0 |
| PDZ domain-containing protein 2 OS=Homo sapiens GN=PDZD2 PE=1 SV=4                                      | PDZD2_HUMAN  | 302 kDa | 1 | 0 | 0 | 0 |
| Lysine-specific demethylase 5B OS=Homo sapiens GN=KDM5B PE=1 SV=3                                       | KDM5B_HUMAN  | 176 kDa | 1 | 0 | 0 | 0 |
| Brain-specific angiogenesis inhibitor 3 OS=Homo sapiens GN=BAI3 PE=1 SV=2                               | BAI3_HUMAN   | 172 kDa | 1 | 0 | 0 | 0 |
| Zinc finger protein 644 OS=Homo sapiens GN=ZNF644 PE=1 SV=2                                             | ZN644_HUMAN  | 150 kDa | 1 | 0 | 0 | 0 |
| Zinc finger protein 574 OS=Homo sapiens GN=ZNF574 PE=1 SV=2                                             | ZN574_HUMAN  | 99 kDa  | 1 | 0 | 0 | 0 |
| Zinc finger CCCH domain-containing protein 7B OS=Homo sapiens GN=ZC3H7B PE=1 SV=1                       | Z3H7B_HUMAN  | 112 kDa | 1 | 0 | 0 | 0 |
| Protocadherin Fat 1 OS=Homo sapiens GN=FAT1 PE=1 SV=2                                                   | FAT1_HUMAN   | 506 kDa | 1 | 0 | 0 | 0 |
| Uncharacterized protein C3orf20 OS=Homo sapiens GN=C3orf20 PE=1 SV=2                                    | CC020_HUMAN  | 101 kDa | 1 | 0 | 0 | 0 |
| Glutamyl aminopeptidase OS=Homo sapiens GN=ENPEP PE=1 SV=3                                              | AMPE_HUMAN   | 109 kDa | 1 | 0 | 0 | 0 |
| Keratin-associated protein 4-12 OS=Homo sapiens GN=KRTAP4-12 PE=2 SV=1                                  | KR412_HUMAN  | 21 kDa  | 1 | 0 | 0 | 0 |
| E3 ubiquitin-protein ligase HERC2 OS=Homo sapiens GN=HERC2 PE=1 SV=2                                    | HERC2_HUMAN  | 527 kDa | 1 | 0 | 0 | 0 |
| NACHT and WD repeat domain-containing protein 1 OS=Homo sapiens GN=NWD1 PE=2 SV=3                       | NWD1_HUMAN   | 175 kDa | 1 | 0 | 0 | 0 |
| Schlafen family member 13 OS=Homo sapiens GN=SLFN13 PE=2 SV=1                                           | SLN13_HUMAN  | 102 kDa | 1 | 0 | 0 | 0 |
| Myomesin-1 OS=Homo sapiens GN=MYOM1 PE=1 SV=2                                                           | MYOM1_HUMAN  | 188 kDa | 1 | 0 | 0 | 0 |
| Trichohyalin OS=Homo sapiens GN=TCHH PE=1 SV=2                                                          | TRHY_HUMAN   | 254 kDa | 1 | 0 | 0 | 0 |
| G-protein coupled receptor 124 OS=Homo sapiens GN=GPR124 PE=1 SV=2                                      | GP124_HUMAN  | 143 kDa | 1 | 0 | 0 | 0 |
| A-kinase anchor protein 8 OS=Homo sapiens GN=AKAP8 PE=1 SV=1                                            | AKAP8_HUMAN  | 76 kDa  | 1 | 0 | 0 | 0 |
| Probable methyltransferase TARBP1 OS=Homo sapiens GN=TARBP1 PE=1 SV=1                                   | TARB1_HUMAN  | 182 kDa | 1 | 0 | 0 | 0 |
| Copper-transporting ATPase 2 OS=Homo sapiens GN=ATP7B PE=1 SV=4                                         | ATP7B_HUMAN  | 157 kDa | 1 | 0 | 0 | 0 |
| Tight junction protein ZO-2 OS=Homo sapiens GN=TJP2 PE=1 SV=2                                           | ZO2_HUMAN    | 134 kDa | 1 | 0 | 0 | 0 |
| Ubiquitin-conjugating enzyme E2 O OS=Homo sapiens GN=UBE2O PE=1 SV=3                                    | UBE2O_HUMAN  | 141 kDa | 1 | 0 | 0 | 0 |
| WD repeat-containing protein 1 OS=Homo sapiens GN=WDR1 PE=1 SV=4                                        | WDR1_HUMAN   | 66 kDa  | 1 | 3 | 1 | 1 |
| Ankyrin repeat domain-containing protein 26 OS=Homo sapiens GN=ANKRD26 PE=1 SV=3                        | ANR26_HUMAN  | 196 kDa | 1 | 1 | 0 | 1 |
| Histone-lysine N-methyltransferase MLL3 OS=Homo sapiens GN=MLL3 PE=1 SV=3                               | MLL3_HUMAN   | 541 kDa | 1 | 0 | 0 | 0 |
| Polyadenylate-binding protein 1 OS=Homo sapiens GN=PABPC1 PE=1 SV=2                                     | PABP1_HUMAN  | 71 kDa  | 1 | 1 | 1 | 0 |
| A disintegrin and metalloproteinase with thrombospondin motifs 20 OS=Homo sapiens GN=ADAMTS20 PE=1 SV=1 | ATS20_HUMAN  | 215 kDa | 1 | 0 | 0 | 1 |
| Baculoviral IAP repeat-containing protein 6 OS=Homo sapiens GN=BIRC6 PE=1 SV=2                          | BIRC6_HUMAN  | 530 kDa | 1 | 1 | 0 | 0 |
| Collagen alpha-6(VI) chain OS=Homo sapiens GN=COL6A6 PE=1 SV=2                                          | CO6A6_HUMAN  | 247 kDa | 1 | 0 | 0 | 1 |
| Tyrosine-protein kinase JAK2 OS=Homo sapiens GN=JAK2 PE=1 SV=2                                          | JAK2_HUMAN   | 131 kDa | 1 | 0 | 0 | 0 |
| A disintegrin and metalloproteinase with thrombospondin motifs 9 OS=Homo sapiens GN=ADAMTS9 PE=2 SV=1   | ATS9_HUMAN   | 216 kDa | 1 | 0 | 1 | 0 |
| Homeobox protein cut-like 2 OS=Homo sapiens GN=CUX2 PE=1 SV=4                                           | CUX2_HUMAN   | 162 kDa | 1 | 0 | 0 | 0 |
| Gamma-aminobutyric acid receptor subunit epsilon OS=Homo sapiens GN=GABRE PE=2 SV=2                     | GBRE_HUMAN   | 58 kDa  | 1 | 0 | 0 | 1 |
| SH3 and PX domain-containing protein 2A OS=Homo sapiens GN=SH3PXD2A PE=1 SV=1                           | SPD2A_HUMAN  | 125 kDa | 1 | 0 | 0 | 0 |
| Laminin subunit alpha-2 OS=Homo sapiens GN=LAMA2 PE=1 SV=4                                              | LAMA2_HUMAN  | 344 kDa | 1 | 0 | 0 | 0 |
| PH-interacting protein OS=Homo sapiens GN=PHIP PE=1 SV=2                                                | PHIP_HUMAN   | 207 kDa | 1 | 0 | 0 | 0 |
| Connective tissue growth factor OS=Homo sapiens GN=CTGF PE=1 SV=2                                       | CTGF_HUMAN   | 38 kDa  | 1 | 0 | 2 | 0 |
| Trinucleotide repeat-containing gene 18 protein OS=Homo sapiens GN=TNRC18 PE=1 SV=3                     | TNC18_HUMAN  | 315 kDa | 1 | 0 | 1 | 0 |
| DNA polymerase zeta catalytic subunit OS=Homo sapiens GN=REV3L PE=1 SV=2                                | DPOLZ_HUMAN  | 353 kDa | 1 | 0 | 1 | 0 |
| Zinc finger MYM-type protein 3 OS=Homo sapiens GN=ZMYM3 PE=1 SV=2                                       | ZMYM3_HUMAN  | 152 kDa | 1 | 0 | 0 | 0 |
| Cellular nucleic acid-binding protein OS=Homo sapiens GN=CNBP PE=1 SV=1                                 | CNBP_HUMAN   | 19 kDa  | 1 | 0 | 0 | 1 |
| Synemin OS=Homo sapiens GN=SYNM PE=1 SV=2                                                               | SYNM_HUMAN   | 173 kDa | 1 | 0 | 0 | 1 |
| Collagen alpha-3(V) chain OS=Homo sapiens GN=COL5A3 PE=1 SV=3                                           | CO5A3_HUMAN  | 172 kDa | 1 | 0 | 1 | 0 |
| Fanconi anemia group M protein OS=Homo sapiens GN=FANCM PE=1 SV=2                                       | FANCM_HUMAN  | 232 kDa | 1 | 0 | 0 | 1 |
| Zinc finger protein 608 OS=Homo sapiens GN=ZNF608 PE=1 SV=4                                             | ZN608_HUMAN  | 162 kDa | 1 | 0 | 0 | 0 |
| Centrosomal protein of 78 kDa OS=Homo sapiens GN=CEP78 PE=1 SV=1                                        | CEP78_HUMAN  | 76 kDa  | 1 | 0 | 0 | 0 |
| Myosin light chain kinase, smooth muscle OS=Homo sapiens GN=MYLK PE=1 SV=4                              | MYLK_HUMAN   | 211 kDa | 1 | 0 | 1 | 0 |
| Integrator complex subunit 3 OS=Homo sapiens GN=INTS3 PE=1 SV=1                                         | INT3_HUMAN   | 118 kDa | 1 | 0 | 0 | 0 |
| Condensin-2 complex subunit D3 OS=Homo sapiens GN=NCAPD3 PE=1 SV=2                                      | CNDD3_HUMAN  | 169 kDa | 1 | 0 | 0 | 0 |
| E3 ubiquitin-protein ligase HUWE1 OS=Homo sapiens GN=HUWE1 PE=1 SV=3                                    | HUWE1_HUMAN  | 482 kDa | 1 | 0 | 0 | 0 |
| Transcription termination factor 2 OS=Homo sapiens GN=TTF2 PE=1 SV=2                                    | TTF2_HUMAN   | 130 kDa | 1 | 0 | 0 | 0 |
| Diacylglycerol kinase kappa OS=Homo sapiens GN=DGKK PE=1 SV=1                                           | DGKK_HUMAN   | 142 kDa | 1 | 1 | 0 | 0 |
| Protocadherin Fat 3 OS=Homo sapiens GN=FAT3 PE=2 SV=2                                                   | FAT3_HUMAN   | 506 kDa | 1 | 0 | 0 | 0 |
| Inhibitor of Bruton tyrosine kinase OS=Homo sapiens GN=IBTK PE=1 SV=3                                   | IBTK_HUMAN   | 151 kDa | 1 | 0 | 0 | 0 |
| Myelin transcription factor 1 OS=Homo sapiens GN=MYT1 PE=1 SV=2                                         | MYT1_HUMAN   | 122 kDa | 1 | 0 | 0 | 0 |
| Intraflagellar transport protein 172 homolog OS=Homo sapiens GN=IFT172 PE=1 SV=2                        | IF172_HUMAN  | 198 kDa | 1 | 0 | 0 | 0 |

|                                                                                                  |             |         |   |   |   |   |
|--------------------------------------------------------------------------------------------------|-------------|---------|---|---|---|---|
| Alpha-tectorin OS=Homo sapiens GN=TECTA PE=1 SV=3                                                | TECTA_HUMAN | 240 kDa | 1 | 0 | 0 | 0 |
| Myosin-13 OS=Homo sapiens GN=MYH13 PE=1 SV=2                                                     | MYH13_HUMAN | 224 kDa | 1 | 0 | 0 | 0 |
| ProSAP-interacting protein 1 OS=Homo sapiens GN=PROSAPIP1 PE=2 SV=1                              | PRIP1_HUMAN | 72 kDa  | 1 | 0 | 0 | 0 |
| Androglobin OS=Homo sapiens GN=ADGB PE=2 SV=3                                                    | ADGB_HUMAN  | 190 kDa | 1 | 0 | 0 | 0 |
| Zinc finger protein 429 OS=Homo sapiens GN=ZNF429 PE=1 SV=2                                      | ZN429_HUMAN | 78 kDa  | 1 | 0 | 0 | 0 |
| Inversin OS=Homo sapiens GN=INVS PE=1 SV=2                                                       | INVS_HUMAN  | 118 kDa | 1 | 0 | 0 | 0 |
| Inactive ubiquitin carboxyl-terminal hydrolase 54 OS=Homo sapiens GN=USP54 PE=1 SV=4             | UBP54_HUMAN | 187 kDa | 1 | 0 | 0 | 0 |
| Chromodomain-helicase-DNA-binding protein 4 OS=Homo sapiens GN=CHD4 PE=1 SV=2                    | CHD4_HUMAN  | 218 kDa | 1 | 0 | 0 | 0 |
| GRIP and coiled-coil domain-containing protein 2 OS=Homo sapiens GN=GCC2 PE=1 SV=4               | GCC2_HUMAN  | 196 kDa | 1 | 0 | 0 | 0 |
| Crumbs homolog 1 OS=Homo sapiens GN=CRB1 PE=1 SV=2                                               | CRUM1_HUMAN | 154 kDa | 1 | 0 | 0 | 0 |
| L-amino-acid oxidase OS=Homo sapiens GN=IL4I1 PE=1 SV=1                                          | OXLA_HUMAN  | 63 kDa  | 1 | 0 | 0 | 0 |
| Islet cell autoantigen 1-like protein OS=Homo sapiens GN=ICA1L PE=2 SV=1                         | ICA1L_HUMAN | 54 kDa  | 1 | 0 | 0 | 0 |
| Glycosyltransferase-like protein LARGE1 OS=Homo sapiens GN=LARGE PE=1 SV=1                       | LARGE_HUMAN | 88 kDa  | 1 | 0 | 0 | 0 |
| Serotransferrin OS=Homo sapiens GN=TF PE=1 SV=3                                                  | TRFE_HUMAN  | 77 kDa  | 1 | 0 | 0 | 0 |
| SH3 and PX domain-containing protein 2B OS=Homo sapiens GN=SH3PXD2B PE=1 SV=3                    | SPD2B_HUMAN | 102 kDa | 1 | 0 | 0 | 0 |
| DNA polymerase alpha catalytic subunit OS=Homo sapiens GN=POLA1 PE=1 SV=2                        | DPOLA_HUMAN | 166 kDa | 1 | 0 | 0 | 0 |
| E3 ubiquitin-protein ligase listerin OS=Homo sapiens GN=LTN1 PE=1 SV=6                           | LTN1_HUMAN  | 201 kDa | 1 | 0 | 0 | 0 |
| Zinc finger protein 568 OS=Homo sapiens GN=ZNF568 PE=2 SV=2                                      | ZN568_HUMAN | 74 kDa  | 1 | 0 | 0 | 0 |
| Tetratricopeptide repeat protein 29 OS=Homo sapiens GN=TTC29 PE=2 SV=2                           | TTC29_HUMAN | 55 kDa  | 1 | 0 | 0 | 0 |
| 40S ribosomal protein S4, X isoform OS=Homo sapiens GN=RPS4X PE=1 SV=2                           | RS4X_HUMAN  | 30 kDa  | 1 | 1 | 2 | 1 |
| Protein FAM208A OS=Homo sapiens GN=FAM208A PE=1 SV=3                                             | F208A_HUMAN | 189 kDa | 1 | 1 | 0 | 0 |
| HEAT repeat-containing protein 5B OS=Homo sapiens GN=HEATR5B PE=1 SV=2                           | HTR5B_HUMAN | 224 kDa | 1 | 0 | 1 | 1 |
| Dystrophin OS=Homo sapiens GN=DMD PE=1 SV=3                                                      | DMD_HUMAN   | 427 kDa | 1 | 1 | 1 | 0 |
| Protein AATF OS=Homo sapiens GN=AATF PE=1 SV=1                                                   | AATF_HUMAN  | 63 kDa  | 1 | 0 | 0 | 1 |
| Epidermal growth factor receptor OS=Homo sapiens GN=EGFR PE=1 SV=2                               | EGFR_HUMAN  | 134 kDa | 1 | 1 | 1 | 0 |
| Myosin-6 OS=Homo sapiens GN=MYH6 PE=1 SV=5                                                       | MYH6_HUMAN  | 224 kDa | 1 | 0 | 1 | 1 |
| Ankyrin repeat and protein kinase domain-containing protein 1 OS=Homo sapiens GN=ANKK1 PE=1 SV=1 | ANKK1_HUMAN | 85 kDa  | 1 | 1 | 0 | 0 |
| Ankyrin-3 OS=Homo sapiens GN=ANK3 PE=1 SV=3                                                      | ANK3_HUMAN  | 480 kDa | 1 | 0 | 0 | 0 |
| Collagen alpha-1(XIII) chain OS=Homo sapiens GN=COL13A1 PE=1 SV=1                                | CODA1_HUMAN | 70 kDa  | 1 | 1 | 2 | 0 |
| Anterior gradient protein 2 homolog OS=Homo sapiens GN=AGR2 PE=1 SV=1                            | AGR2_HUMAN  | 20 kDa  | 1 | 0 | 2 | 1 |
| Uncharacterized protein C19orf21 OS=Homo sapiens GN=C19orf21 PE=1 SV=1                           | CS021_HUMAN | 75 kDa  | 1 | 1 | 0 | 1 |
| Coiled-coil domain-containing protein 96 OS=Homo sapiens GN=CCDC96 PE=2 SV=2                     | CCD96_HUMAN | 63 kDa  | 1 | 1 | 1 | 0 |
| Matrin-3 OS=Homo sapiens GN=MATR3 PE=1 SV=2                                                      | MATR3_HUMAN | 95 kDa  | 1 | 0 | 1 | 1 |
| Keratin, type I cytoskeletal 9 OS=Homo sapiens GN=KRT9 PE=1 SV=3                                 | K1C9_HUMAN  | 62 kDa  | 1 | 0 | 1 | 1 |
| PRA1 family protein 3 OS=Homo sapiens GN=ARL6IP5 PE=1 SV=1                                       | PRAF3_HUMAN | 22 kDa  | 1 | 0 | 1 | 1 |
| Heterogeneous nuclear ribonucleoprotein A1-like 2 OS=Homo sapiens GN=HNRNPA1L2 PE=2 SV=2         | RA1L2_HUMAN | 34 kDa  | 1 | 0 | 1 | 1 |
| 60S ribosomal protein L4 OS=Homo sapiens GN=RPL4 PE=1 SV=5                                       | RL4_HUMAN   | 48 kDa  | 1 | 1 | 0 | 1 |
| 60S ribosomal protein L8 OS=Homo sapiens GN=RPL8 PE=1 SV=2                                       | RL8_HUMAN   | 28 kDa  | 1 | 0 | 2 | 1 |
| Retinitis pigmentosa 1-like 1 protein OS=Homo sapiens GN=RP1L1 PE=1 SV=4                         | RP1L1_HUMAN | 261 kDa | 1 | 0 | 1 | 1 |
| PCI domain-containing protein 2 OS=Homo sapiens GN=PCID2 PE=1 SV=2                               | PCID2_HUMAN | 46 kDa  | 1 | 0 | 0 | 1 |
| Zinc finger protein 687 OS=Homo sapiens GN=ZNF687 PE=1 SV=1                                      | ZN687_HUMAN | 130 kDa | 1 | 0 | 1 | 0 |
| Zinc finger protein 616 OS=Homo sapiens GN=ZNF616 PE=2 SV=2                                      | ZN616_HUMAN | 90 kDa  | 1 | 0 | 0 | 1 |
| Myotubularin-related protein 3 OS=Homo sapiens GN=MTMR3 PE=1 SV=3                                | MTMR3_HUMAN | 134 kDa | 1 | 2 | 0 | 0 |
| Heterogeneous nuclear ribonucleoprotein H OS=Homo sapiens GN=HNRNPH1 PE=1 SV=4                   | HNRH1_HUMAN | 49 kDa  | 1 | 0 | 0 | 1 |
| Agrin OS=Homo sapiens GN=AGRN PE=1 SV=4                                                          | AGRN_HUMAN  | 215 kDa | 1 | 0 | 0 | 1 |
| Myosin-4 OS=Homo sapiens GN=MYH4 PE=1 SV=2                                                       | MYH4_HUMAN  | 223 kDa | 1 | 0 | 0 | 0 |
| Vacuolar protein sorting-associated protein 13D OS=Homo sapiens GN=VPS13D PE=1 SV=1              | VP13D_HUMAN | 492 kDa | 1 | 0 | 1 | 0 |
| Protein transport protein Sec16A OS=Homo sapiens GN=SEC16A PE=1 SV=3                             | SC16A_HUMAN | 234 kDa | 1 | 0 | 0 | 0 |
| Anoctamin-8 OS=Homo sapiens GN=ANO8 PE=2 SV=3                                                    | ANO8_HUMAN  | 136 kDa | 1 | 0 | 0 | 0 |
| Tripartite motif-containing protein 46 OS=Homo sapiens GN=TRIM46 PE=2 SV=2                       | TRI46_HUMAN | 83 kDa  | 1 | 1 | 0 | 0 |
| Probable ATP-dependent RNA helicase DDX17 OS=Homo sapiens GN=DDX17 PE=1 SV=2                     | DDX17_HUMAN | 80 kDa  | 1 | 0 | 0 | 0 |
| BRCA1-A complex subunit RAP80 OS=Homo sapiens GN=UIMC1 PE=1 SV=2                                 | UIMC1_HUMAN | 80 kDa  | 1 | 0 | 0 | 0 |
| 5-hydroxytryptamine receptor 2A OS=Homo sapiens GN=HTR2A PE=1 SV=2                               | 5HT2A_HUMAN | 53 kDa  | 1 | 0 | 0 | 0 |
| Helicase SRCAP OS=Homo sapiens GN=SRCAP PE=1 SV=3                                                | SRCAP_HUMAN | 344 kDa | 1 | 0 | 0 | 0 |
| Plakophilin-4 OS=Homo sapiens GN=PKP4 PE=1 SV=2                                                  | PKP4_HUMAN  | 132 kDa | 1 | 0 | 0 | 1 |
| Polypyrimidine tract-binding protein 1 OS=Homo sapiens GN=PTBP1 PE=1 SV=1                        | PTBP1_HUMAN | 57 kDa  | 1 | 0 | 0 | 1 |
| Coiled-coil domain-containing protein 62 OS=Homo sapiens GN=CCDC62 PE=1 SV=2                     | CCD62_HUMAN | 78 kDa  | 1 | 1 | 0 | 0 |
| Wilms tumor protein 1-interacting protein OS=Homo sapiens GN=WTIP PE=1 SV=3                      | WTIP_HUMAN  | 45 kDa  | 1 | 0 | 1 | 0 |
| Reticulon-4 OS=Homo sapiens GN=RTN4 PE=1 SV=2                                                    | RTN4_HUMAN  | 130 kDa | 1 | 1 | 0 | 0 |
| Tight junction protein ZO-1 OS=Homo sapiens GN=TJP1 PE=1 SV=3                                    | ZO1_HUMAN   | 195 kDa | 1 | 0 | 1 | 0 |
| Zinc finger protein 385B OS=Homo sapiens GN=ZNF385B PE=2 SV=1                                    | Z385B_HUMAN | 50 kDa  | 1 | 1 | 0 | 0 |
| Synaptotagmin-1 OS=Homo sapiens GN=SYNJ1 PE=1 SV=2                                               | SYNJ1_HUMAN | 173 kDa | 1 | 0 | 0 | 1 |
| Coiled-coil and C2 domain-containing protein 2A OS=Homo sapiens GN=CC2D2A PE=1 SV=3              | C2D2A_HUMAN | 186 kDa | 1 | 0 | 0 | 0 |
| Complement C2 OS=Homo sapiens GN=C2 PE=1 SV=2                                                    | CO2_HUMAN   | 83 kDa  | 1 | 0 | 0 | 1 |
| Nuclear receptor coactivator 3 OS=Homo sapiens GN=NCOA3 PE=1 SV=1                                | NCOA3_HUMAN | 155 kDa | 1 | 0 | 0 | 0 |
| Interleukin enhancer-binding factor 3 OS=Homo sapiens GN=ILF3 PE=1 SV=3                          | ILF3_HUMAN  | 95 kDa  | 1 | 0 | 2 | 0 |
| Protein PRRC2A OS=Homo sapiens GN=PRRC2A PE=1 SV=3                                               | PRC2A_HUMAN | 229 kDa | 1 | 0 | 0 | 0 |
| Gephyrin OS=Homo sapiens GN=GPHN PE=1 SV=1                                                       | GEPH_HUMAN  | 80 kDa  | 1 | 0 | 0 | 1 |
| Protein phosphatase Slingshot homolog 1 OS=Homo sapiens GN=SSH1 PE=1 SV=2                        | SSH1_HUMAN  | 116 kDa | 1 | 0 | 0 | 1 |
| Zinc finger protein 268 OS=Homo sapiens GN=ZNF268 PE=1 SV=2                                      | ZN268_HUMAN | 108 kDa | 1 | 0 | 1 | 0 |
| E3 ubiquitin-protein ligase TRIM36 OS=Homo sapiens GN=TRIM36 PE=2 SV=2                           | TRI36_HUMAN | 83 kDa  | 1 | 0 | 0 | 0 |
| Failed axon connections homolog OS=Homo sapiens GN=FAXC PE=2 SV=2                                | FAXC_HUMAN  | 47 kDa  | 1 | 0 | 0 | 0 |
| NFX1-type zinc finger-containing protein 1 OS=Homo sapiens GN=ZNFX1 PE=1 SV=2                    | ZNFX1_HUMAN | 220 kDa | 1 | 0 | 0 | 0 |
| Protein transport protein Sec24A OS=Homo sapiens GN=SEC24A PE=1 SV=2                             | SC24A_HUMAN | 120 kDa | 1 | 0 | 0 | 0 |
| Cytochrome P450 4V2 OS=Homo sapiens GN=CYP4V2 PE=1 SV=2                                          | CP4V2_HUMAN | 61 kDa  | 1 | 0 | 0 | 0 |
| Putative uncharacterized protein ENSP00000382790 OS=Homo sapiens PE=5 SV=3                       | YD021_HUMAN | 73 kDa  | 1 | 0 | 0 | 0 |
| 3-ketoacyl-CoA thiolase, peroxisomal OS=Homo sapiens GN=ACAA1 PE=1 SV=2                          | THIK_HUMAN  | 44 kDa  | 1 | 0 | 0 | 0 |
| Kinesin-like protein KIF13A OS=Homo sapiens GN=KIF13A PE=1 SV=2                                  | KI13A_HUMAN | 202 kDa | 1 | 0 | 0 | 0 |
| Keratin-associated protein 4-1 OS=Homo sapiens GN=KRTAP4-1 PE=2 SV=3                             | KRA41_HUMAN | 15 kDa  | 1 | 0 | 0 | 0 |
| AF4/FMR2 family member 1 OS=Homo sapiens GN=AFF1 PE=1 SV=1                                       | AFF1_HUMAN  | 131 kDa | 1 | 0 | 0 | 0 |
| ATP-binding cassette sub-family A member 10 OS=Homo sapiens GN=ABCA10 PE=1 SV=3                  | ABCAA_HUMAN | 176 kDa | 1 | 0 | 0 | 0 |
| Zinc finger protein Aiolos OS=Homo sapiens GN=IKZF3 PE=1 SV=2                                    | IKZF3_HUMAN | 58 kDa  | 1 | 0 | 0 | 0 |

|                                                                                                            |              |         |   |   |   |   |
|------------------------------------------------------------------------------------------------------------|--------------|---------|---|---|---|---|
| Hepatocyte growth factor OS=Homo sapiens GN=HGF PE=1 SV=2                                                  | HGF_HUMAN    | 83 kDa  | 1 | 0 | 0 | 0 |
| AP-3 complex subunit delta-1 OS=Homo sapiens GN=AP3D1 PE=1 SV=1                                            | AP3D1_HUMAN  | 130 kDa | 1 | 0 | 0 | 0 |
| Polycystic kidney disease and receptor for egg jelly-related protein OS=Homo sapiens GN=PKDREJ PE=2 SV=1   | PKDREJ_HUMAN | 255 kDa | 1 | 0 | 0 | 0 |
| Attractin OS=Homo sapiens GN=ATRN PE=1 SV=2                                                                | ATRN_HUMAN   | 159 kDa | 1 | 0 | 0 | 0 |
| Protein-methionine sulfoxide oxidase MICAL3 OS=Homo sapiens GN=MICAL3 PE=1 SV=2                            | MICA3_HUMAN  | 224 kDa | 1 | 0 | 0 | 0 |
| Band 4.1-like protein 3 OS=Homo sapiens GN=EPB41L3 PE=1 SV=2                                               | E41L3_HUMAN  | 121 kDa | 1 | 0 | 0 | 0 |
| Zinc finger protein 283 OS=Homo sapiens GN=ZNF283 PE=2 SV=4                                                | ZNF283_HUMAN | 78 kDa  | 1 | 0 | 0 | 0 |
| Testin OS=Homo sapiens GN=TES PE=1 SV=1                                                                    | TES_HUMAN    | 48 kDa  | 1 | 0 | 0 | 0 |
| Sialoadhesin OS=Homo sapiens GN=SIGLEC1 PE=1 SV=2                                                          | SN_HUMAN     | 183 kDa | 1 | 0 | 0 | 0 |
| Isoleucine--tRNA ligase, cytoplasmic OS=Homo sapiens GN=IARS PE=1 SV=2                                     | SYIC_HUMAN   | 145 kDa | 1 | 0 | 0 | 0 |
| Membrane metallo-endopeptidase-like 1 OS=Homo sapiens GN=MMEL1 PE=1 SV=2                                   | MMEL1_HUMAN  | 89 kDa  | 1 | 0 | 0 | 0 |
| Probable phospholipid-transporting ATPase IF OS=Homo sapiens GN=ATP11B PE=1 SV=2                           | AT11B_HUMAN  | 134 kDa | 1 | 0 | 0 | 0 |
| Uncharacterized protein KIAA1614 OS=Homo sapiens GN=KIAA1614 PE=2 SV=3                                     | K1614_HUMAN  | 127 kDa | 1 | 0 | 0 | 0 |
| Atrial natriuretic peptide receptor 3 OS=Homo sapiens GN=NPR3 PE=1 SV=2                                    | ANPRC_HUMAN  | 60 kDa  | 1 | 0 | 0 | 0 |
| OTU domain-containing protein 7A OS=Homo sapiens GN=OTUD7A PE=1 SV=1                                       | OTU7A_HUMAN  | 101 kDa | 1 | 0 | 0 | 0 |
| WNT1-inducible-signaling pathway protein 3 OS=Homo sapiens GN=WISP3 PE=1 SV=1                              | WISP3_HUMAN  | 39 kDa  | 1 | 0 | 0 | 0 |
| Ephrin type-A receptor 5 OS=Homo sapiens GN=EPHA5 PE=1 SV=3                                                | EPHA5_HUMAN  | 115 kDa | 1 | 0 | 0 | 0 |
| Keratin-associated protein 5-3 OS=Homo sapiens GN=KRTAP5-3 PE=2 SV=1                                       | KRA53_HUMAN  | 22 kDa  | 1 | 0 | 0 | 0 |
| Transforming protein RhoA OS=Homo sapiens GN=RHOA PE=1 SV=1                                                | RHOA_HUMAN   | 22 kDa  | 1 | 0 | 0 | 0 |
| Zinc finger protein 30 homolog OS=Homo sapiens GN=ZFP30 PE=2 SV=1                                          | ZFP30_HUMAN  | 62 kDa  | 1 | 0 | 0 | 0 |
| Nebulin-related-anchoring protein 5 OS=Homo sapiens GN=NRAP PE=2 SV=2                                      | NRAP_HUMAN   | 197 kDa | 1 | 0 | 0 | 0 |
| Probable ATP-dependent RNA helicase DDX4 OS=Homo sapiens GN=DDX4 PE=2 SV=2                                 | DDX4_HUMAN   | 79 kDa  | 1 | 0 | 0 | 0 |
| Ephrin type-A receptor 6 OS=Homo sapiens GN=EPHA6 PE=2 SV=2                                                | EPHA6_HUMAN  | 116 kDa | 1 | 0 | 0 | 0 |
| Peptidylprolyl isomerase domain and WD repeat-containing protein 1 OS=Homo sapiens GN=PPWD1 PE=1 SV=1      | PPWD1_HUMAN  | 74 kDa  | 1 | 0 | 0 | 0 |
| Exophilin-5 OS=Homo sapiens GN=EXPH5 PE=1 SV=3                                                             | EXPH5_HUMAN  | 223 kDa | 1 | 0 | 0 | 0 |
| Spectrin beta chain, brain 3 OS=Homo sapiens GN=SPTBN4 PE=1 SV=2                                           | SPTN4_HUMAN  | 289 kDa | 1 | 0 | 0 | 0 |
| Uncharacterized protein C17orf66 OS=Homo sapiens GN=C17orf66 PE=2 SV=2                                     | CQ066_HUMAN  | 66 kDa  | 1 | 0 | 0 | 0 |
| DEP domain-containing protein 1B OS=Homo sapiens GN=DEPDC1B PE=2 SV=2                                      | DEP1B_HUMAN  | 62 kDa  | 1 | 0 | 0 | 0 |
| Protocadherin Fat 2 OS=Homo sapiens GN=FAT2 PE=1 SV=2                                                      | FAT2_HUMAN   | 479 kDa | 1 | 0 | 0 | 0 |
| Integrin beta-8 OS=Homo sapiens GN=ITGB8 PE=1 SV=1                                                         | ITB8_HUMAN   | 86 kDa  | 1 | 0 | 0 | 0 |
| Kinase suppressor of Ras 1 OS=Homo sapiens GN=KSR1 PE=1 SV=2                                               | KSR1_HUMAN   | 102 kDa | 1 | 0 | 0 | 0 |
| Histone-lysine N-methyltransferase MLL4 OS=Homo sapiens GN=WBP7 PE=1 SV=1                                  | MLL4_HUMAN   | 294 kDa | 1 | 0 | 0 | 0 |
| Molybdenum cofactor sulfuryase OS=Homo sapiens GN=MOCOS PE=1 SV=2                                          | MOCOS_HUMAN  | 98 kDa  | 1 | 0 | 0 | 0 |
| Multidrug resistance-associated protein 5 OS=Homo sapiens GN=ABCC5 PE=1 SV=2                               | MRP5_HUMAN   | 161 kDa | 1 | 0 | 0 | 0 |
| Myoneurin OS=Homo sapiens GN=MYNN PE=1 SV=1                                                                | MYNN_HUMAN   | 69 kDa  | 1 | 0 | 0 | 0 |
| Neuromedin-U receptor 1 OS=Homo sapiens GN=NMUR1 PE=2 SV=1                                                 | NMUR1_HUMAN  | 47 kDa  | 1 | 0 | 0 | 0 |
| OTU domain-containing protein 6A OS=Homo sapiens GN=OTUD6A PE=2 SV=1                                       | OTU6A_HUMAN  | 33 kDa  | 1 | 0 | 0 | 0 |
| Arginine-glutamic acid dipeptide repeats protein OS=Homo sapiens GN=RERE PE=1 SV=2                         | RERE_HUMAN   | 172 kDa | 1 | 0 | 0 | 0 |
| Signal recognition particle 54 kDa protein OS=Homo sapiens GN=SRP54 PE=1 SV=1                              | SRP54_HUMAN  | 56 kDa  | 1 | 0 | 0 | 0 |
| Tumor necrosis factor receptor superfamily member 9 OS=Homo sapiens GN=TNFRSF9 PE=1 SV=1                   | TNFR9_HUMAN  | 28 kDa  | 1 | 0 | 0 | 0 |
| Probable ATP-dependent RNA helicase YTHDC2 OS=Homo sapiens GN=YTHDC2 PE=1 SV=2                             | YTHDC2_HUMAN | 160 kDa | 1 | 0 | 0 | 0 |
| Protein phosphatase methylesterase 1 OS=Homo sapiens GN=PPME1 PE=1 SV=3                                    | PPME1_HUMAN  | 42 kDa  | 1 | 0 | 0 | 0 |
| Hepatocyte growth factor receptor OS=Homo sapiens GN=MET PE=1 SV=4                                         | MET_HUMAN    | 156 kDa | 1 | 0 | 0 | 0 |
| Zinc finger protein 614 OS=Homo sapiens GN=ZNF614 PE=2 SV=2                                                | ZNF614_HUMAN | 67 kDa  | 1 | 0 | 0 | 0 |
| Transient receptor potential cation channel subfamily M member 6 OS=Homo sapiens GN=TRPM6 PE=1 SV=1        | TRPM6_HUMAN  | 232 kDa | 1 | 0 | 0 | 0 |
| Zinc finger C3H1 domain-containing protein OS=Homo sapiens GN=ZFC3H1 PE=1 SV=3                             | ZC3H1_HUMAN  | 226 kDa | 1 | 0 | 0 | 0 |
| Sterile alpha motif domain-containing protein 9-like OS=Homo sapiens GN=SAMD9L PE=1 SV=2                   | SAMD9L_HUMAN | 185 kDa | 1 | 0 | 0 | 0 |
| Pataatin-like phospholipase domain-containing protein 1 OS=Homo sapiens GN=PNPLA1 PE=2 SV=3                | PLPL1_HUMAN  | 58 kDa  | 1 | 0 | 0 | 0 |
| Collagen alpha-2(IV) chain OS=Homo sapiens GN=COL4A2 PE=1 SV=4                                             | CO4A2_HUMAN  | 168 kDa | 1 | 0 | 0 | 0 |
| Chondroitin sulfate proteoglycan 4 OS=Homo sapiens GN=CSPG4 PE=1 SV=2                                      | CSPG4_HUMAN  | 251 kDa | 1 | 0 | 0 | 0 |
| Dedicator of cytokinesis protein 11 OS=Homo sapiens GN=DOCK11 PE=1 SV=2                                    | DOCK11_HUMAN | 238 kDa | 1 | 0 | 0 | 0 |
| Syntaxin-binding protein 2 OS=Homo sapiens GN=STXB2 PE=1 SV=2                                              | STXB2_HUMAN  | 66 kDa  | 1 | 0 | 0 | 0 |
| WD repeat-containing protein 11 OS=Homo sapiens GN=WDR11 PE=1 SV=1                                         | WDR11_HUMAN  | 137 kDa | 1 | 0 | 0 | 0 |
| AP-2 complex subunit alpha-1 OS=Homo sapiens GN=AP2A1 PE=1 SV=3                                            | AP2A1_HUMAN  | 108 kDa | 1 | 0 | 0 | 0 |
| Voltage-dependent L-type calcium channel subunit alpha-1F OS=Homo sapiens GN=CACNA1F PE=1 SV=2             | CAC1F_HUMAN  | 221 kDa | 1 | 0 | 0 | 0 |
| Heterogeneous nuclear ribonucleoprotein F OS=Homo sapiens GN=HNRNPF PE=1 SV=3                              | HNRPF_HUMAN  | 46 kDa  | 1 | 1 | 1 | 1 |
| Protein PRRC2B OS=Homo sapiens GN=PRRC2B PE=1 SV=2                                                         | PRC2B_HUMAN  | 243 kDa | 1 | 0 | 1 | 0 |
| Signal peptide, CUB and EGF-like domain-containing protein 1 OS=Homo sapiens GN=SCUBE1 PE=1 SV=3           | SCUB1_HUMAN  | 108 kDa | 1 | 1 | 1 | 0 |
| Zinc finger protein 782 OS=Homo sapiens GN=ZNF782 PE=2 SV=1                                                | ZNF782_HUMAN | 81 kDa  | 1 | 0 | 0 | 1 |
| Zinc finger protein 764 OS=Homo sapiens GN=ZNF764 PE=1 SV=2                                                | ZNF764_HUMAN | 45 kDa  | 1 | 0 | 1 | 0 |
| Tuftelin-interacting protein 11 OS=Homo sapiens GN=TFIP11 PE=1 SV=1                                        | TFP11_HUMAN  | 97 kDa  | 1 | 1 | 0 | 1 |
| Probable ATP-dependent RNA helicase DDX5 OS=Homo sapiens GN=DDX5 PE=1 SV=1                                 | DDX5_HUMAN   | 69 kDa  | 1 | 1 | 0 | 1 |
| Probable phospholipid-transporting ATPase VB OS=Homo sapiens GN=ATP10B PE=2 SV=2                           | AT10B_HUMAN  | 165 kDa | 1 | 1 | 0 | 1 |
| Probable RNA-binding protein 20 OS=Homo sapiens GN=RBM20 PE=1 SV=3                                         | RBM20_HUMAN  | 134 kDa | 1 | 0 | 0 | 1 |
| Nuclease-sensitive element-binding protein 1 OS=Homo sapiens GN=YBX1 PE=1 SV=3                             | YBOX1_HUMAN  | 36 kDa  | 1 | 1 | 1 | 0 |
| 60S ribosomal protein L12 OS=Homo sapiens GN=RPL12 PE=1 SV=1                                               | RL12_HUMAN   | 18 kDa  | 1 | 0 | 1 | 1 |
| Myb-binding protein 1A OS=Homo sapiens GN=MYBBP1A PE=1 SV=2                                                | MBB1A_HUMAN  | 149 kDa | 1 | 1 | 1 | 0 |
| Protein scribble homolog OS=Homo sapiens GN=SCRIB PE=1 SV=4                                                | SCRIB_HUMAN  | 175 kDa | 1 | 1 | 1 | 0 |
| Desmin OS=Homo sapiens GN=DES PE=1 SV=3                                                                    | DESM_HUMAN   | 54 kDa  | 1 | 0 | 0 | 1 |
| Zinc finger protein 343 OS=Homo sapiens GN=ZNF343 PE=2 SV=1                                                | ZNF343_HUMAN | 69 kDa  | 1 | 0 | 1 | 1 |
| Heterogeneous nuclear ribonucleoprotein U-like protein 1 OS=Homo sapiens GN=HNRNPUL1 PE=1 SV=2             | HNRL1_HUMAN  | 96 kDa  | 1 | 1 | 1 | 0 |
| Uncharacterized protein C2orf54 OS=Homo sapiens GN=C2orf54 PE=1 SV=2                                       | C8054_HUMAN  | 50 kDa  | 1 | 1 | 0 | 1 |
| Pecanex-like protein 2 OS=Homo sapiens GN=PCNXL2 PE=1 SV=3                                                 | PCX2_HUMAN   | 237 kDa | 1 | 0 | 1 | 0 |
| GTP-binding protein 10 OS=Homo sapiens GN=GTPBP10 PE=1 SV=1                                                | GTPBA_HUMAN  | 43 kDa  | 1 | 0 | 1 | 1 |
| T-complex protein 1 subunit gamma OS=Homo sapiens GN=CCT3 PE=1 SV=4                                        | TCPG_HUMAN   | 61 kDa  | 1 | 0 | 0 | 0 |
| Golgin subfamily A member 1 OS=Homo sapiens GN=GOLGA1 PE=1 SV=3                                            | GOGA1_HUMAN  | 88 kDa  | 1 | 0 | 1 | 0 |
| STAR-related lipid transfer protein 9 OS=Homo sapiens GN=STARD9 PE=1 SV=3                                  | STAR9_HUMAN  | 516 kDa | 1 | 0 | 1 | 0 |
| CXXC-type zinc finger protein 11 OS=Homo sapiens GN=CXXC11 PE=2 SV=2                                       | CB085_HUMAN  | 60 kDa  | 1 | 0 | 0 | 0 |
| ATP-dependent RNA helicase DDX3X OS=Homo sapiens GN=DDX3X PE=1 SV=3                                        | DDX3X_HUMAN  | 73 kDa  | 1 | 0 | 0 | 1 |
| Probable 2-oxoglutarate dehydrogenase E1 component DHKTD1, mitochondrial OS=Homo sapiens GN=DH DHTK1_HUMAN | DHTK1_HUMAN  | 103 kDa | 1 | 0 | 1 | 0 |
| Bardet-Biedl syndrome 7 protein OS=Homo sapiens GN=BBS7 PE=1 SV=2                                          | BBS7_HUMAN   | 80 kDa  | 1 | 1 | 0 | 0 |
| Cysteine/serine-rich nuclear protein 1 OS=Homo sapiens GN=CSRN1 PE=2 SV=2                                  | CSRN1_HUMAN  | 64 kDa  | 1 | 0 | 0 | 0 |

|                                                                                                               |             |         |   |   |   |   |
|---------------------------------------------------------------------------------------------------------------|-------------|---------|---|---|---|---|
| Unconventional myosin-VIIB OS=Homo sapiens GN=MYO7B PE=2 SV=2                                                 | MYO7B_HUMAN | 242 kDa | 1 | 0 | 1 | 0 |
| HERV-K_1q23.3 provirus ancestral Pol protein OS=Homo sapiens PE=3 SV=2                                        | POK7_HUMAN  | 92 kDa  | 1 | 0 | 0 | 0 |
| Retinal-specific ATP-binding cassette transporter OS=Homo sapiens GN=ABCA4 PE=1 SV=3                          | ABCA4_HUMAN | 256 kDa | 1 | 0 | 0 | 0 |
| PGAP2-interacting protein OS=Homo sapiens GN=CWH43 PE=2 SV=2                                                  | PG2IP_HUMAN | 79 kDa  | 1 | 1 | 0 | 0 |
| SET and MYND domain-containing protein 1 OS=Homo sapiens GN=SMYD1 PE=2 SV=1                                   | SMYD1_HUMAN | 57 kDa  | 1 | 0 | 1 | 0 |
| Desmoglein-3 OS=Homo sapiens GN=DSG3 PE=1 SV=2                                                                | DSG3_HUMAN  | 108 kDa | 1 | 0 | 0 | 0 |
| Prostaglandin reductase 1 OS=Homo sapiens GN=PTGR1 PE=1 SV=2                                                  | PTGR1_HUMAN | 36 kDa  | 1 | 0 | 0 | 1 |
| Dolichyl-diphosphooligosaccharide--protein glycosyltransferase subunit 2 OS=Homo sapiens GN=RPN2 PE=          | RPN2_HUMAN  | 69 kDa  | 1 | 0 | 0 | 1 |
| Coiled-coil domain-containing protein 73 OS=Homo sapiens GN=CCDC73 PE=1 SV=2                                  | CCD73_HUMAN | 124 kDa | 1 | 0 | 0 | 1 |
| Plasma membrane calcium-transporting ATPase 3 OS=Homo sapiens GN=ATP2B3 PE=1 SV=3                             | AT2B3_HUMAN | 134 kDa | 1 | 0 | 1 | 0 |
| Flotillin-1 OS=Homo sapiens GN=FLOT1 PE=1 SV=3                                                                | FLOT1_HUMAN | 47 kDa  | 1 | 0 | 0 | 1 |
| Hedgehog-interacting protein OS=Homo sapiens GN=HHIP PE=1 SV=3                                                | HHIP_HUMAN  | 79 kDa  | 1 | 0 | 1 | 0 |
| Catenin delta-1 OS=Homo sapiens GN=CTNND1 PE=1 SV=1                                                           | CTND1_HUMAN | 108 kDa | 1 | 0 | 0 | 1 |
| Keratin, type I cytoskeletal 13 OS=Homo sapiens GN=KRT13 PE=1 SV=4                                            | K1C13_HUMAN | 50 kDa  | 1 | 1 | 0 | 0 |
| ATP-binding cassette sub-family C member 11 OS=Homo sapiens GN=ABCC11 PE=1 SV=1                               | ABCCB_HUMAN | 154 kDa | 1 | 0 | 1 | 0 |
| Brain-specific angiogenesis inhibitor 1 OS=Homo sapiens GN=BAI1 PE=1 SV=1                                     | BAI1_HUMAN  | 174 kDa | 1 | 1 | 0 | 0 |
| Uracil phosphoribosyltransferase homolog OS=Homo sapiens GN=UPRT PE=2 SV=1                                    | UPP_HUMAN   | 34 kDa  | 1 | 0 | 0 | 1 |
| Aryl hydrocarbon receptor repressor OS=Homo sapiens GN=AHRR PE=2 SV=3                                         | AHRR_HUMAN  | 76 kDa  | 1 | 0 | 0 | 0 |
| 60S ribosomal protein L17 OS=Homo sapiens GN=RPL17 PE=1 SV=3                                                  | RL17_HUMAN  | 21 kDa  | 1 | 0 | 0 | 1 |
| Synerglin gamma OS=Homo sapiens GN=SYNRG PE=1 SV=2                                                            | SYNRG_HUMAN | 141 kDa | 1 | 0 | 1 | 0 |
| Dynammin-3 OS=Homo sapiens GN=DNM3 PE=1 SV=4                                                                  | DYN3_HUMAN  | 98 kDa  | 1 | 0 | 1 | 0 |
| Unconventional myosin-Vb OS=Homo sapiens GN=MYO5B PE=1 SV=3                                                   | MYO5B_HUMAN | 214 kDa | 1 | 0 | 1 | 0 |
| Keratin, type II cytoskeletal 75 OS=Homo sapiens GN=KRT75 PE=1 SV=2                                           | K2C75_HUMAN | 60 kDa  | 1 | 0 | 1 | 0 |
| Proto-oncogene tyrosine-protein kinase Src OS=Homo sapiens GN=SRC PE=1 SV=3                                   | SRC_HUMAN   | 60 kDa  | 1 | 0 | 0 | 1 |
| SPATS2-like protein OS=Homo sapiens GN=SPATS2L PE=1 SV=2                                                      | SPS2L_HUMAN | 62 kDa  | 1 | 0 | 1 | 0 |
| A-kinase anchor protein 1, mitochondrial OS=Homo sapiens GN=AKAP1 PE=1 SV=1                                   | AKAP1_HUMAN | 97 kDa  | 1 | 0 | 0 | 1 |
| Tubulin beta-1 chain OS=Homo sapiens GN=TTUBB1 PE=1 SV=1                                                      | TBB1_HUMAN  | 50 kDa  | 1 | 0 | 0 | 0 |
| Zinc finger protein 788 OS=Homo sapiens GN=ZNF788 PE=2 SV=2                                                   | ZN788_HUMAN | 72 kDa  | 1 | 0 | 0 | 0 |
| Filamin-A-interacting protein 1 OS=Homo sapiens GN=FILIP1 PE=1 SV=1                                           | FLIP1_HUMAN | 138 kDa | 1 | 0 | 0 | 0 |
| Speckle-type POZ protein-like OS=Homo sapiens GN=SPOPL PE=2 SV=1                                              | SPOPL_HUMAN | 45 kDa  | 1 | 0 | 0 | 0 |
| Coiled-coil domain-containing protein 18 OS=Homo sapiens GN=CCDC18 PE=1 SV=1                                  | CCD18_HUMAN | 169 kDa | 1 | 0 | 0 | 0 |
| Multidrug resistance-associated protein 1 OS=Homo sapiens GN=ABCC1 PE=1 SV=3                                  | MRP1_HUMAN  | 172 kDa | 1 | 0 | 0 | 0 |
| Laminin subunit gamma-2 OS=Homo sapiens GN=LAMC2 PE=1 SV=2                                                    | LAMC2_HUMAN | 131 kDa | 1 | 0 | 0 | 0 |
| Receptor-type tyrosine-protein phosphatase delta OS=Homo sapiens GN=PTPRD PE=1 SV=2                           | PTPRD_HUMAN | 215 kDa | 1 | 0 | 0 | 0 |
| Nucleolar complex protein 4 homolog OS=Homo sapiens GN=NOC4L PE=1 SV=1                                        | NOC4L_HUMAN | 58 kDa  | 1 | 0 | 0 | 0 |
| Peroxisome proliferator-activated receptor gamma coactivator-related protein 1 OS=Homo sapiens GN=PPRC1_HUMAN | PPRC1_HUMAN | 178 kDa | 1 | 0 | 0 | 0 |
| Putative hexokinase HKDC1 OS=Homo sapiens GN=HKDC1 PE=2 SV=3                                                  | HKDC1_HUMAN | 103 kDa | 1 | 0 | 0 | 0 |
| Perforin-1 OS=Homo sapiens GN=PRF1 PE=1 SV=1                                                                  | PERF_HUMAN  | 61 kDa  | 1 | 0 | 0 | 0 |
| CLIP-associating protein 1 OS=Homo sapiens GN=CLASP1 PE=1 SV=1                                                | CLAP1_HUMAN | 169 kDa | 1 | 0 | 0 | 0 |
| Cartilage intermediate layer protein 2 OS=Homo sapiens GN=CILP2 PE=2 SV=2                                     | CILP2_HUMAN | 126 kDa | 1 | 0 | 0 | 0 |
| Pecanex-like protein 1 OS=Homo sapiens GN=PCNX PE=2 SV=2                                                      | PCX1_HUMAN  | 259 kDa | 1 | 0 | 0 | 0 |
| Calcium-activated potassium channel subunit alpha-1 OS=Homo sapiens GN=KCNMA1 PE=1 SV=2                       | KCMA1_HUMAN | 138 kDa | 1 | 0 | 0 | 0 |
| Coiled-coil domain-containing protein 116 OS=Homo sapiens GN=CCDC116 PE=2 SV=2                                | CC116_HUMAN | 57 kDa  | 1 | 0 | 0 | 0 |
| Transmembrane protein 232 OS=Homo sapiens GN=TMEM232 PE=2 SV=2                                                | TM232_HUMAN | 76 kDa  | 1 | 0 | 0 | 0 |
| HERV-K_5q33.3 provirus ancestral Pol protein OS=Homo sapiens PE=3 SV=2                                        | POK10_HUMAN | 115 kDa | 1 | 0 | 0 | 0 |
| Bile acid receptor OS=Homo sapiens GN=NR1H4 PE=1 SV=2                                                         | NR1H4_HUMAN | 56 kDa  | 1 | 0 | 0 | 0 |
| Cytochrome b5 reductase 4 OS=Homo sapiens GN=CYB5R4 PE=1 SV=1                                                 | NB5R4_HUMAN | 59 kDa  | 1 | 0 | 0 | 0 |
| Low-density lipoprotein receptor-related protein 8 OS=Homo sapiens GN=LRP8 PE=1 SV=4                          | LRP8_HUMAN  | 106 kDa | 1 | 0 | 0 | 0 |
| Paraneoplastic antigen Ma3 OS=Homo sapiens GN=PNMA3 PE=2 SV=2                                                 | PNMA3_HUMAN | 52 kDa  | 1 | 0 | 0 | 0 |
| Putative protein FAM157A OS=Homo sapiens GN=FAM157A PE=3 SV=1                                                 | F157A_HUMAN | 43 kDa  | 1 | 0 | 0 | 0 |
| Janus kinase and microtubule-interacting protein 1 OS=Homo sapiens GN=JAKMIP1 PE=1 SV=1                       | JKIP1_HUMAN | 73 kDa  | 1 | 0 | 0 | 0 |
| Transmembrane protein 5 OS=Homo sapiens GN=TMEM5 PE=2 SV=1                                                    | TMEM5_HUMAN | 51 kDa  | 1 | 0 | 0 | 0 |
| Methenyltetrahydrofolate synthase domain-containing protein OS=Homo sapiens GN=MTHFS D PE=1 SV=2              | MTHSD_HUMAN | 42 kDa  | 1 | 0 | 0 | 0 |
| MYCBP-associated protein OS=Homo sapiens GN=MYCBPAP PE=1 SV=2                                                 | MYBPP_HUMAN | 108 kDa | 1 | 0 | 0 | 0 |
| Transcriptional repressor p66-alpha OS=Homo sapiens GN=GATAD2A PE=1 SV=1                                      | P66A_HUMAN  | 68 kDa  | 1 | 0 | 0 | 0 |
| Mediator of RNA polymerase II transcription subunit 18 OS=Homo sapiens GN=MED18 PE=1 SV=1                     | MED18_HUMAN | 24 kDa  | 1 | 0 | 0 | 0 |
| Mitochondrial intermediate peptidase OS=Homo sapiens GN=MIPEP PE=1 SV=2                                       | MIPEP_HUMAN | 81 kDa  | 1 | 0 | 0 | 0 |
| UHRF1-binding protein 1 OS=Homo sapiens GN=UHRF1BP1 PE=1 SV=1                                                 | URFB1_HUMAN | 159 kDa | 1 | 0 | 0 | 0 |
| Protein FAM83C OS=Homo sapiens GN=FAM83C PE=1 SV=3                                                            | FA83C_HUMAN | 81 kDa  | 1 | 0 | 0 | 0 |
| Tetraspanin-12 OS=Homo sapiens GN=TSPAN12 PE=1 SV=1                                                           | TSN12_HUMAN | 35 kDa  | 1 | 0 | 0 | 0 |
| RAD51-associated protein 1 OS=Homo sapiens GN=RAD51AP1 PE=1 SV=1                                              | R51A1_HUMAN | 38 kDa  | 1 | 0 | 0 | 0 |
| Zinc finger protein 407 OS=Homo sapiens GN=ZNF407 PE=2 SV=2                                                   | ZN407_HUMAN | 247 kDa | 1 | 0 | 0 | 0 |
| Cortactin-binding protein 2 OS=Homo sapiens GN=CTTNBP2 PE=1 SV=1                                              | CTTB2_HUMAN | 181 kDa | 1 | 0 | 0 | 0 |
| Kinesin-like protein KIFC3 OS=Homo sapiens GN=KIFC3 PE=1 SV=4                                                 | KIFC3_HUMAN | 93 kDa  | 1 | 0 | 0 | 0 |
| Heat shock 70 kDa protein 4L OS=Homo sapiens GN=HSPA4L PE=1 SV=3                                              | HS74L_HUMAN | 95 kDa  | 1 | 0 | 0 | 0 |
| Transcription initiation factor IIB OS=Homo sapiens GN=GTF2B PE=1 SV=1                                        | TF2B_HUMAN  | 35 kDa  | 1 | 0 | 0 | 0 |
| E3 ubiquitin-protein ligase XIAP OS=Homo sapiens GN=XIAP PE=1 SV=2                                            | XIAP_HUMAN  | 57 kDa  | 1 | 0 | 0 | 0 |
| Ligand-dependent nuclear receptor corepressor-like protein OS=Homo sapiens GN=LCORL PE=2 SV=4                 | LCORL_HUMAN | 67 kDa  | 1 | 0 | 0 | 0 |
| Uncharacterized protein C9orf163 OS=Homo sapiens GN=C9orf163 PE=2 SV=1                                        | C163_HUMAN  | 22 kDa  | 1 | 0 | 0 | 0 |
| Probable phospholipid-transporting ATPase IA OS=Homo sapiens GN=ATP8A1 PE=1 SV=1                              | AT8A1_HUMAN | 131 kDa | 1 | 0 | 0 | 0 |
| Acyl-coenzyme A synthetase ACSM6, mitochondrial OS=Homo sapiens GN=ACSM6 PE=2 SV=3                            | ACSM6_HUMAN | 54 kDa  | 1 | 0 | 0 | 0 |
| Voltage-dependent calcium channel subunit alpha-2/delta-2 OS=Homo sapiens GN=CACNA2D2 PE=1 SV=2               | CA2D2_HUMAN | 130 kDa | 1 | 0 | 0 | 0 |
| Probable ATP-dependent RNA helicase DDX31 OS=Homo sapiens GN=DDX31 PE=1 SV=2                                  | DDX31_HUMAN | 94 kDa  | 1 | 0 | 0 | 0 |
| Extracellular matrix protein 1 OS=Homo sapiens GN=ECM1 PE=1 SV=2                                              | ECM1_HUMAN  | 61 kDa  | 1 | 0 | 0 | 0 |
| Integrin alpha-M OS=Homo sapiens GN=ITGAM PE=1 SV=2                                                           | ITAM_HUMAN  | 127 kDa | 1 | 0 | 0 | 0 |
| Uncharacterized protein KIAA1841 OS=Homo sapiens GN=KIAA1841 PE=2 SV=2                                        | K1841_HUMAN | 82 kDa  | 1 | 0 | 0 | 0 |
| BTB/POZ domain-containing protein KCTD19 OS=Homo sapiens GN=KCTD19 PE=2 SV=1                                  | KCD19_HUMAN | 105 kDa | 1 | 0 | 0 | 0 |
| Leiomodin-1 OS=Homo sapiens GN=LMOD1 PE=1 SV=3                                                                | LMOD1_HUMAN | 67 kDa  | 1 | 0 | 0 | 0 |
| Probable guanine nucleotide exchange factor MCF2L2 OS=Homo sapiens GN=MCF2L2 PE=2 SV=3                        | MF2L2_HUMAN | 127 kDa | 1 | 0 | 0 | 0 |
| Serine/threonine-protein kinase PLK4 OS=Homo sapiens GN=PLK4 PE=1 SV=3                                        | PLK4_HUMAN  | 109 kDa | 1 | 0 | 0 | 0 |
| Spermatogenesis-associated protein 13 OS=Homo sapiens GN=SPATA13 PE=1 SV=1                                    | SPT13_HUMAN | 75 kDa  | 1 | 0 | 0 | 0 |
| Protein sprouty homolog 1 OS=Homo sapiens GN=SPRY1 PE=1 SV=2                                                  | SPY1_HUMAN  | 35 kDa  | 1 | 0 | 0 | 0 |

|                                                                                                    |              |         |   |   |   |   |
|----------------------------------------------------------------------------------------------------|--------------|---------|---|---|---|---|
| WAP four-disulfide core domain protein 3 OS=Homo sapiens GN=WFDC3 PE=2 SV=1                        | WFDC3_HUMAN  | 25 kDa  | 1 | 0 | 0 | 0 |
| E3 ubiquitin-protein ligase ZSWIM2 OS=Homo sapiens GN=ZSWIM2 PE=1 SV=2                             | ZSWIM2_HUMAN | 73 kDa  | 1 | 0 | 0 | 0 |
| Protein Hook homolog 3 OS=Homo sapiens GN=HOOK3 PE=1 SV=2                                          | HOOK3_HUMAN  | 83 kDa  | 1 | 0 | 0 | 0 |
| Transforming growth factor-beta-induced protein ig-h3 OS=Homo sapiens GN=TGFB1 PE=1 SV=1           | BGH3_HUMAN   | 75 kDa  | 1 | 0 | 0 | 0 |
| Succinate dehydrogenase [ubiquinone] flavoprotein subunit, mitochondrial OS=Homo sapiens GN=SDHA P | DHSA_HUMAN   | 73 kDa  | 1 | 0 | 0 | 0 |
| Sortilin-related receptor OS=Homo sapiens GN=SORL1 PE=1 SV=2                                       | SORL_HUMAN   | 248 kDa | 1 | 0 | 0 | 0 |
| Olfactory receptor 51A7 OS=Homo sapiens GN=OR51A7 PE=2 SV=1                                        | OS1A7_HUMAN  | 35 kDa  | 1 | 0 | 0 | 0 |
| Probable phospholipid-transporting ATPase IIB OS=Homo sapiens GN=ATP9B PE=2 SV=4                   | ATP9B_HUMAN  | 129 kDa | 1 | 0 | 0 | 0 |
| Ran-binding protein 17 OS=Homo sapiens GN=RANBP17 PE=2 SV=1                                        | RBP17_HUMAN  | 124 kDa | 1 | 0 | 0 | 0 |
| Probable threonine protease PRSS50 OS=Homo sapiens GN=PRSS50 PE=1 SV=1                             | TSP50_HUMAN  | 43 kDa  | 1 | 0 | 0 | 0 |
| Protein FAM40A OS=Homo sapiens GN=FAM40A PE=1 SV=1                                                 | FA40A_HUMAN  | 96 kDa  | 1 | 0 | 0 | 0 |
| Putative Polycomb group protein ASXL1 OS=Homo sapiens GN=ASXL1 PE=1 SV=3                           | ASXL1_HUMAN  | 165 kDa | 1 | 0 | 0 | 0 |
| Methyl-CpG-binding domain protein 3-like 2 OS=Homo sapiens GN=MBD3L2 PE=2 SV=3                     | MB3L2_HUMAN  | 23 kDa  | 1 | 0 | 0 | 0 |
| Muscarinic acetylcholine receptor M5 OS=Homo sapiens GN=CHRM5 PE=2 SV=2                            | ACM5_HUMAN   | 60 kDa  | 1 | 0 | 0 | 0 |
| Electrogenic sodium bicarbonate cotransporter 1 OS=Homo sapiens GN=SLC4A4 PE=1 SV=1                | S4A4_HUMAN   | 121 kDa | 1 | 0 | 0 | 0 |
| 1-phosphatidylinositol 4,5-bisphosphate phosphodiesterase beta-4 OS=Homo sapiens GN=PLCB4 PE=1 SV= | PLCB4_HUMAN  | 134 kDa | 1 | 0 | 0 | 0 |
| DENN domain-containing protein 1A OS=Homo sapiens GN=DENND1A PE=1 SV=2                             | DEN1A_HUMAN  | 111 kDa | 1 | 0 | 0 | 0 |
| Ras-associating and dilute domain-containing protein OS=Homo sapiens GN=RADIL PE=1 SV=5            | RADIL_HUMAN  | 117 kDa | 1 | 0 | 0 | 0 |
| Probable RNA-binding protein 19 OS=Homo sapiens GN=RBM19 PE=1 SV=3                                 | RBM19_HUMAN  | 107 kDa | 1 | 0 | 0 | 0 |
| Vacuolar protein sorting-associated protein 52 homolog OS=Homo sapiens GN=VPS52 PE=1 SV=1          | VPS52_HUMAN  | 82 kDa  | 1 | 0 | 0 | 0 |
| Putative golgin subfamily A member 6-like protein 3 OS=Homo sapiens GN=GOLGA6L3 PE=5 SV=3          | GG6L3_HUMAN  | 56 kDa  | 1 | 0 | 0 | 0 |
| Vacuolar protein sorting-associated protein 37D OS=Homo sapiens GN=VPS37D PE=1 SV=2                | VP37D_HUMAN  | 28 kDa  | 1 | 0 | 0 | 0 |
| Selenoprotein O OS=Homo sapiens GN=SELO PE=2 SV=3                                                  | SELO_HUMAN   | 73 kDa  | 1 | 0 | 0 | 0 |
| NEDD8 ultimate buster 1 OS=Homo sapiens GN=NUB1 PE=1 SV=2                                          | NUB1_HUMAN   | 71 kDa  | 1 | 0 | 0 | 0 |
| Influenza virus NS1A-binding protein OS=Homo sapiens GN=IVNS1ABP PE=1 SV=3                         | NS1BP_HUMAN  | 72 kDa  | 1 | 0 | 0 | 0 |
| Protein regulator of cytokinesis 1 OS=Homo sapiens GN=PRC1 PE=1 SV=2                               | PRC1_HUMAN   | 72 kDa  | 1 | 0 | 0 | 0 |
| Zinc finger protein OZF OS=Homo sapiens GN=ZNF146 PE=1 SV=2                                        | OZF_HUMAN    | 33 kDa  | 1 | 0 | 0 | 0 |
| ELAV-like protein 3 OS=Homo sapiens GN=ELAVL3 PE=1 SV=3                                            | ELAV3_HUMAN  | 40 kDa  | 1 | 0 | 0 | 0 |
| TBC1 domain family member 9 OS=Homo sapiens GN=TBC1D9 PE=1 SV=2                                    | TBCD9_HUMAN  | 143 kDa | 1 | 0 | 0 | 0 |
| DNA replication licensing factor MCM3 OS=Homo sapiens GN=MCM3 PE=1 SV=3                            | MCM3_HUMAN   | 91 kDa  | 1 | 0 | 0 | 0 |
| Plakophilin-2 OS=Homo sapiens GN=PKP2 PE=1 SV=2                                                    | PKP2_HUMAN   | 97 kDa  | 1 | 0 | 0 | 0 |
| SAFB-like transcription modulator OS=Homo sapiens GN=SLTM PE=1 SV=2                                | SLTM_HUMAN   | 117 kDa | 1 | 0 | 0 | 0 |
| Protein ARMCX6 OS=Homo sapiens GN=ARMCX6 PE=1 SV=1                                                 | ARMX6_HUMAN  | 33 kDa  | 1 | 0 | 0 | 0 |
| Blood group Rh(CE) polypeptide OS=Homo sapiens GN=RHCE PE=1 SV=2                                   | RHCE_HUMAN   | 46 kDa  | 1 | 0 | 0 | 0 |
| Putative dimethylaniline monooxygenase [N-oxide-forming] 6 OS=Homo sapiens GN=FMO6P PE=5 SV=1      | FMO6_HUMAN   | 61 kDa  | 1 | 0 | 0 | 0 |
| Vacuolar protein sorting-associated protein 18 homolog OS=Homo sapiens GN=VPS18 PE=1 SV=2          | VPS18_HUMAN  | 110 kDa | 1 | 0 | 0 | 0 |
| Ribosomal protein S6 kinase alpha-3 OS=Homo sapiens GN=RP56KA3 PE=1 SV=1                           | KS6A3_HUMAN  | 84 kDa  | 1 | 0 | 0 | 0 |
| Ubiquitin-60S ribosomal protein L40 OS=Homo sapiens GN=UBA52 PE=1 SV=2                             | RL40_HUMAN   | 15 kDa  | 1 | 1 | 1 | 0 |
| Translocon-associated protein subunit delta OS=Homo sapiens GN=SSRA4 PE=1 SV=1                     | SSRD_HUMAN   | 19 kDa  | 1 | 0 | 1 | 1 |
| 40S ribosomal protein SA OS=Homo sapiens GN=RP5A PE=1 SV=4                                         | RSSA_HUMAN   | 33 kDa  | 1 | 1 | 0 | 1 |
| Myosin light chain 6B OS=Homo sapiens GN=MYL6B PE=1 SV=1                                           | MYL6B_HUMAN  | 23 kDa  | 1 | 0 | 1 | 0 |
| Thioredoxin reductase 1, cytoplasmic OS=Homo sapiens GN=TXNRD1 PE=1 SV=3                           | TRXR1_HUMAN  | 71 kDa  | 1 | 1 | 0 | 0 |
| 26S protease regulatory subunit 8 OS=Homo sapiens GN=PSMC5 PE=1 SV=1                               | PRS8_HUMAN   | 46 kDa  | 1 | 0 | 1 | 0 |
| Pregnancy zone protein OS=Homo sapiens GN=PZP PE=1 SV=4                                            | PZP_HUMAN    | 164 kDa | 1 | 0 | 1 | 0 |
| Schlafen family member 12 OS=Homo sapiens GN=SLFN12 PE=1 SV=2                                      | SLN12_HUMAN  | 67 kDa  | 1 | 0 | 1 | 0 |
| Protocadherin-16 OS=Homo sapiens GN=DCHS1 PE=2 SV=1                                                | PCD16_HUMAN  | 346 kDa | 1 | 0 | 0 | 1 |
| OX-2 membrane glycoprotein OS=Homo sapiens GN=CD200 PE=1 SV=4                                      | OX2G_HUMAN   | 31 kDa  | 1 | 0 | 0 | 1 |
| DNA ligase 3 OS=Homo sapiens GN=LIG3 PE=1 SV=2                                                     | DNL3_HUMAN   | 113 kDa | 1 | 0 | 0 | 0 |
| T-complex protein 1 subunit eta OS=Homo sapiens GN=CCT7 PE=1 SV=2                                  | TCPH_HUMAN   | 59 kDa  | 1 | 0 | 1 | 0 |
| Importin-13 OS=Homo sapiens GN=IPO13 PE=1 SV=3                                                     | IPO13_HUMAN  | 108 kDa | 1 | 0 | 0 | 0 |
| Trinucleotide repeat-containing gene 6A protein OS=Homo sapiens GN=TNRC6A PE=1 SV=2                | TNR6A_HUMAN  | 210 kDa | 1 | 0 | 1 | 0 |
| UDP-N-acetylglucosamine transferase subunit ALG13 homolog OS=Homo sapiens GN=ALG13 PE=1 SV=2       | ALG13_HUMAN  | 126 kDa | 1 | 0 | 0 | 0 |
| Exportin-2 OS=Homo sapiens GN=CSE1L PE=1 SV=3                                                      | XPO2_HUMAN   | 110 kDa | 1 | 0 | 1 | 0 |
| 40S ribosomal protein S24 OS=Homo sapiens GN=RP524 PE=1 SV=1                                       | RS24_HUMAN   | 15 kDa  | 1 | 0 | 1 | 0 |
| Exocyst complex component 6B OS=Homo sapiens GN=EXOC6B PE=1 SV=3                                   | EXC6B_HUMAN  | 94 kDa  | 1 | 1 | 0 | 0 |
| Coatomer subunit beta' OS=Homo sapiens GN=COBP2 PE=1 SV=2                                          | COBP2_HUMAN  | 102 kDa | 1 | 0 | 0 | 1 |
| Latrophilin-1 OS=Homo sapiens GN=LPHN1 PE=1 SV=1                                                   | LPHN1_HUMAN  | 163 kDa | 1 | 0 | 0 | 1 |
| 60S ribosomal protein L23 OS=Homo sapiens GN=RPL23 PE=1 SV=1                                       | RL23_HUMAN   | 15 kDa  | 1 | 0 | 0 | 1 |
| Tubulin beta-2B chain OS=Homo sapiens GN=TUBB2B PE=1 SV=1                                          | TBB2B_HUMAN  | 50 kDa  | 1 | 0 | 0 | 1 |
| Protein-glutamine gamma-glutamyltransferase E OS=Homo sapiens GN=TGM3 PE=1 SV=4                    | TGM3_HUMAN   | 77 kDa  | 1 | 0 | 0 | 1 |
| T-box transcription factor TBX6 OS=Homo sapiens GN=TBX6 PE=2 SV=2                                  | TBX6_HUMAN   | 47 kDa  | 1 | 1 | 0 | 0 |
| Luc7-like protein 3 OS=Homo sapiens GN=LUC7L3 PE=1 SV=2                                            | LC7L3_HUMAN  | 51 kDa  | 1 | 0 | 1 | 0 |
| 60S ribosomal protein L6 OS=Homo sapiens GN=RPL6 PE=1 SV=3                                         | RL6_HUMAN    | 33 kDa  | 1 | 0 | 1 | 0 |
| Neurolysin, mitochondrial OS=Homo sapiens GN=NLN PE=1 SV=1                                         | NEUL_HUMAN   | 81 kDa  | 1 | 1 | 0 | 0 |
| Interleukin-2 receptor subunit alpha OS=Homo sapiens GN=IL2RA PE=1 SV=1                            | IL2RA_HUMAN  | 31 kDa  | 1 | 0 | 0 | 0 |
| Rap guanine nucleotide exchange factor 3 OS=Homo sapiens GN=RAPGEF3 PE=1 SV=6                      | RPGF3_HUMAN  | 104 kDa | 1 | 0 | 1 | 0 |
| Translocating chain-associated membrane protein 1 OS=Homo sapiens GN=TRAM1 PE=1 SV=3               | TRAM1_HUMAN  | 43 kDa  | 1 | 0 | 1 | 0 |
| Ski oncogene OS=Homo sapiens GN=SKI PE=1 SV=1                                                      | SKI_HUMAN    | 80 kDa  | 1 | 1 | 0 | 0 |
| Putative SCAN domain-containing protein 2 OS=Homo sapiens GN=SCAND2 PE=5 SV=2                      | SCND2_HUMAN  | 34 kDa  | 1 | 1 | 0 | 0 |
| Inhibitor of growth protein 1 OS=Homo sapiens GN=ING1 PE=1 SV=2                                    | ING1_HUMAN   | 47 kDa  | 1 | 1 | 0 | 0 |
| Thrombospondin-2 OS=Homo sapiens GN=THBS2 PE=1 SV=2                                                | TSP2_HUMAN   | 130 kDa | 1 | 0 | 1 | 0 |
| Uncharacterized protein C10orf111 OS=Homo sapiens GN=C10orf111 PE=2 SV=1                           | CJ111_HUMAN  | 18 kDa  | 1 | 0 | 1 | 0 |
| Collagen alpha-1(IV) chain OS=Homo sapiens GN=COL4A1 PE=1 SV=3                                     | CO4A1_HUMAN  | 161 kDa | 1 | 1 | 0 | 0 |
| Olfactory receptor 13C5 OS=Homo sapiens GN=OR13C5 PE=2 SV=1                                        | O13C5_HUMAN  | 36 kDa  | 1 | 0 | 0 | 0 |
| Gamma-aminobutyric acid receptor subunit rho-3 OS=Homo sapiens GN=GABRR3 PE=2 SV=2                 | GBRR3_HUMAN  | 54 kDa  | 1 | 0 | 1 | 0 |
| Putative RNA-binding protein 15B OS=Homo sapiens GN=RBM15B PE=1 SV=3                               | RB15B_HUMAN  | 97 kDa  | 1 | 0 | 1 | 0 |
| Multiple epidermal growth factor-like domains protein 11 OS=Homo sapiens GN=MEGF11 PE=2 SV=3       | MEG11_HUMAN  | 111 kDa | 1 | 0 | 0 | 1 |
| Protein-glutamine gamma-glutamyltransferase 2 OS=Homo sapiens GN=TGM2 PE=1 SV=2                    | TGM2_HUMAN   | 77 kDa  | 1 | 0 | 0 | 1 |
| Peregrin OS=Homo sapiens GN=BRPF1 PE=1 SV=2                                                        | BRPF1_HUMAN  | 138 kDa | 1 | 0 | 0 | 0 |
| Protein AF-17 OS=Homo sapiens GN=MLLT6 PE=1 SV=2                                                   | AF17_HUMAN   | 112 kDa | 1 | 0 | 0 | 0 |
| Keratin, type I cytoskeletal 17 OS=Homo sapiens GN=KRT17 PE=1 SV=2                                 | K1C17_HUMAN  | 48 kDa  | 1 | 0 | 0 | 0 |
| SH3 and multiple ankyrin repeat domains protein 1 OS=Homo sapiens GN=SHANK1 PE=1 SV=2              | SHAN1_HUMAN  | 225 kDa | 1 | 1 | 0 | 0 |

|                                                                                                                        |             |         |   |   |   |   |
|------------------------------------------------------------------------------------------------------------------------|-------------|---------|---|---|---|---|
| Caveolin-1 OS=Homo sapiens GN=CAV1 PE=1 SV=4                                                                           | CAV1_HUMAN  | 20 kDa  | 1 | 0 | 1 | 0 |
| Cytochrome P450 2E1 OS=Homo sapiens GN=CYP2E1 PE=1 SV=1                                                                | CP2E1_HUMAN | 57 kDa  | 1 | 1 | 0 | 0 |
| Partner and localizer of BRCA2 OS=Homo sapiens GN=PALB2 PE=1 SV=1                                                      | PALB2_HUMAN | 131 kDa | 1 | 0 | 1 | 0 |
| Tristetraprolin OS=Homo sapiens GN=ZFP36 PE=1 SV=1                                                                     | TTP_HUMAN   | 34 kDa  | 1 | 0 | 0 | 0 |
| Chromodomain-helicase-DNA-binding protein 1-like OS=Homo sapiens GN=CHD1L PE=1 SV=2                                    | CHD1L_HUMAN | 101 kDa | 1 | 1 | 0 | 0 |
| Mitotic checkpoint protein BUB3 OS=Homo sapiens GN=BUB3 PE=1 SV=1                                                      | BUB3_HUMAN  | 37 kDa  | 1 | 0 | 0 | 0 |
| Inhibitor of nuclear factor kappa-B kinase subunit beta OS=Homo sapiens GN=IKKB PE=1 SV=1                              | IKKB_HUMAN  | 87 kDa  | 1 | 0 | 0 | 0 |
| Putative fidgetin-like protein 2 OS=Homo sapiens GN=FIGNL2 PE=5 SV=2                                                   | FIGL2_HUMAN | 67 kDa  | 1 | 0 | 0 | 0 |
| Kyphoscoliosis peptidase OS=Homo sapiens GN=KY PE=1 SV=2                                                               | KY_HUMAN    | 64 kDa  | 1 | 1 | 0 | 0 |
| Rhabdoid tumor deletion region protein 1 OS=Homo sapiens GN=RTDR1 PE=2 SV=1                                            | RTDR1_HUMAN | 39 kDa  | 1 | 0 | 0 | 0 |
| Zinc finger protein 430 OS=Homo sapiens GN=ZNF430 PE=2 SV=3                                                            | ZN430_HUMAN | 66 kDa  | 1 | 0 | 0 | 0 |
| Coiled-coil domain-containing protein 158 OS=Homo sapiens GN=CCDC158 PE=2 SV=2                                         | CD158_HUMAN | 127 kDa | 1 | 0 | 0 | 0 |
| E3 ubiquitin-protein ligase UHRF2 OS=Homo sapiens GN=UHRF2 PE=1 SV=1                                                   | UHRF2_HUMAN | 90 kDa  | 1 | 0 | 0 | 0 |
| Importin-9 OS=Homo sapiens GN=IPO9 PE=1 SV=3                                                                           | IPO9_HUMAN  | 116 kDa | 1 | 0 | 0 | 0 |
| Zinc finger protein 516 OS=Homo sapiens GN=ZNF516 PE=1 SV=1                                                            | ZN516_HUMAN | 124 kDa | 1 | 0 | 0 | 0 |
| CpG-binding protein OS=Homo sapiens GN=CXXC1 PE=1 SV=2                                                                 | CXXC1_HUMAN | 76 kDa  | 1 | 0 | 0 | 0 |
| Calcium/calmodulin-dependent protein kinase type II subunit beta OS=Homo sapiens GN=CAMK2B PE=1 SV=1                   | KCC2B_HUMAN | 73 kDa  | 1 | 0 | 0 | 0 |
| E3 ubiquitin-protein ligase Mdm2 OS=Homo sapiens GN=MDM2 PE=1 SV=1                                                     | MDM2_HUMAN  | 55 kDa  | 1 | 0 | 0 | 0 |
| Chaperone activity of bc1 complex-like, mitochondrial OS=Homo sapiens GN=ADCK3 PE=1 SV=1                               | ADCK3_HUMAN | 72 kDa  | 1 | 0 | 0 | 0 |
| RNA 3'-terminal phosphate cyclase OS=Homo sapiens GN=RTCA PE=1 SV=1                                                    | RTCA_HUMAN  | 39 kDa  | 1 | 0 | 0 | 0 |
| FERM and PDZ domain-containing protein 1 OS=Homo sapiens GN=FRMPD1 PE=1 SV=1                                           | FRPD1_HUMAN | 173 kDa | 1 | 0 | 0 | 0 |
| Ankyrin repeat domain-containing protein 6 OS=Homo sapiens GN=ANKRD6 PE=1 SV=3                                         | ANKR6_HUMAN | 80 kDa  | 1 | 0 | 0 | 0 |
| DNA damage-binding protein 2 OS=Homo sapiens GN=DDB2 PE=1 SV=1                                                         | DDB2_HUMAN  | 48 kDa  | 1 | 0 | 0 | 0 |
| Zinc finger protein 398 OS=Homo sapiens GN=ZNF398 PE=2 SV=1                                                            | ZN398_HUMAN | 71 kDa  | 1 | 0 | 0 | 0 |
| 40S ribosomal protein S6 OS=Homo sapiens GN=RP56 PE=1 SV=1                                                             | RS6_HUMAN   | 29 kDa  | 1 | 0 | 0 | 0 |
| Constitutive coactivator of PPAR-gamma-like protein 1 OS=Homo sapiens GN=FAM120A PE=1 SV=2                             | I20A_HUMAN  | 122 kDa | 1 | 0 | 0 | 0 |
| Mast/stem cell growth factor receptor Kit OS=Homo sapiens GN=KIT PE=1 SV=1                                             | KIT_HUMAN   | 110 kDa | 1 | 0 | 0 | 0 |
| Zinc finger protein 42 homolog OS=Homo sapiens GN=ZFP42 PE=1 SV=2                                                      | ZFP42_HUMAN | 35 kDa  | 1 | 0 | 0 | 0 |
| Nuclear pore complex protein Nup98-Nup96 OS=Homo sapiens GN=NUP98 PE=1 SV=4                                            | NUP98_HUMAN | 198 kDa | 1 | 0 | 0 | 0 |
| Keratin, type I cytoskeletal 16 OS=Homo sapiens GN=KRT16 PE=1 SV=4                                                     | K1C16_HUMAN | 51 kDa  | 1 | 0 | 0 | 0 |
| Nuclear receptor subfamily 2 group E member 1 OS=Homo sapiens GN=NR2E1 PE=1 SV=1                                       | NR2E1_HUMAN | 43 kDa  | 1 | 0 | 0 | 0 |
| 5-azacytidine-induced protein 1 OS=Homo sapiens GN=AZI1 PE=1 SV=3                                                      | AZI1_HUMAN  | 122 kDa | 1 | 0 | 0 | 0 |
| Polyribonucleotide nucleotidyltransferase 1, mitochondrial OS=Homo sapiens GN=PNPT1 PE=1 SV=2                          | PNPT1_HUMAN | 86 kDa  | 1 | 0 | 0 | 0 |
| Sodium channel and clathrin linker 1 OS=Homo sapiens GN=SCLT1 PE=1 SV=2                                                | SCLT1_HUMAN | 81 kDa  | 1 | 0 | 0 | 0 |
| TNF receptor-associated factor 3 OS=Homo sapiens GN=TRAF3 PE=1 SV=2                                                    | TRAF3_HUMAN | 64 kDa  | 1 | 0 | 0 | 0 |
| Amyloid beta A4 precursor protein-binding family 8 member 2 OS=Homo sapiens GN=APBB2 PE=1 SV=3                         | APBB2_HUMAN | 83 kDa  | 1 | 0 | 0 | 0 |
| Tumor necrosis factor alpha-induced protein 8-like protein 3 OS=Homo sapiens GN=TNFAIP8L3 PE=2 SV=1                    | TP8L3_HUMAN | 33 kDa  | 1 | 0 | 0 | 0 |
| Calcium/calmodulin-dependent 3',5'-cyclic nucleotide phosphodiesterase 1C OS=Homo sapiens GN=PDE1C PE=1 SV=1           | PDE1C_HUMAN | 81 kDa  | 1 | 0 | 0 | 0 |
| Pantothenate kinase 4 OS=Homo sapiens GN=PANK4 PE=1 SV=1                                                               | PANK4_HUMAN | 86 kDa  | 1 | 0 | 0 | 0 |
| Ras-related protein Rab-15 OS=Homo sapiens GN=RAB15 PE=1 SV=1                                                          | RAB15_HUMAN | 24 kDa  | 1 | 0 | 0 | 0 |
| tRNA-splicing endonuclease subunit Sen54 OS=Homo sapiens GN=TSEN54 PE=1 SV=3                                           | SEN54_HUMAN | 59 kDa  | 1 | 0 | 0 | 0 |
| Adenosine deaminase CECR1 OS=Homo sapiens GN=CECR1 PE=1 SV=2                                                           | CECR1_HUMAN | 59 kDa  | 1 | 0 | 0 | 0 |
| Adenylosuccinate lyase OS=Homo sapiens GN=ADSL PE=1 SV=2                                                               | PUR8_HUMAN  | 55 kDa  | 1 | 0 | 0 | 0 |
| Kallikrein-2 OS=Homo sapiens GN=KLK2 PE=2 SV=1                                                                         | KLK2_HUMAN  | 29 kDa  | 1 | 0 | 0 | 0 |
| Colipase-like protein 2 OS=Homo sapiens GN=CLPSL2 PE=1 SV=3                                                            | COLL2_HUMAN | 11 kDa  | 1 | 0 | 0 | 0 |
| Zinc finger protein 594 OS=Homo sapiens GN=ZNF594 PE=2 SV=3                                                            | ZN594_HUMAN | 94 kDa  | 1 | 0 | 0 | 0 |
| Pseudopodium-enriched atypical kinase 1 OS=Homo sapiens GN=PEAK1 PE=1 SV=4                                             | PEAK1_HUMAN | 193 kDa | 1 | 0 | 0 | 0 |
| Methionine-R-sulfoxide reductase B3 OS=Homo sapiens GN=MSRB3 PE=1 SV=2                                                 | MSRB3_HUMAN | 21 kDa  | 1 | 0 | 0 | 0 |
| Uncharacterized protein C9orf172 OS=Homo sapiens GN=C9orf172 PE=3 SV=1                                                 | C172_HUMAN  | 107 kDa | 1 | 0 | 0 | 0 |
| NACHT, LRR and PYD domains-containing protein 10 OS=Homo sapiens GN=NLRP10 PE=1 SV=1                                   | NAL10_HUMAN | 75 kDa  | 1 | 0 | 0 | 0 |
| Peptidyl-prolyl cis-trans isomerase FKBP6 OS=Homo sapiens GN=FKBP6 PE=1 SV=1                                           | FKBP6_HUMAN | 37 kDa  | 1 | 0 | 0 | 0 |
| F-box/LRR-repeat protein 19 OS=Homo sapiens GN=FBXL19 PE=1 SV=3                                                        | FXL19_HUMAN | 76 kDa  | 1 | 0 | 0 | 0 |
| High affinity cAMP-specific and IBMX-insensitive 3',5'-cyclic phosphodiesterase 8B OS=Homo sapiens GN=IPDE8B PE=1 SV=1 | PDE8B_HUMAN | 99 kDa  | 1 | 0 | 0 | 0 |
| Zinc finger protein 318 OS=Homo sapiens GN=ZNF318 PE=1 SV=2                                                            | ZN318_HUMAN | 251 kDa | 1 | 0 | 0 | 0 |
| Interleukin-17F OS=Homo sapiens GN=IL17F PE=1 SV=3                                                                     | IL17F_HUMAN | 18 kDa  | 1 | 0 | 0 | 0 |
| FAD-dependent oxidoreductase domain-containing protein 2 OS=Homo sapiens GN=FOXRED2 PE=1 SV=1                          | FXRD2_HUMAN | 78 kDa  | 1 | 0 | 0 | 0 |
| Ribosomal L1 domain-containing protein 1 OS=Homo sapiens GN=RSL1D1 PE=1 SV=3                                           | RL1D1_HUMAN | 55 kDa  | 1 | 0 | 0 | 0 |
| KAT8 regulatory NSL complex subunit 1-like protein OS=Homo sapiens GN=KANSL1L PE=1 SV=2                                | KAL1L_HUMAN | 112 kDa | 1 | 0 | 0 | 0 |
| GTPase IMAP family member 5 OS=Homo sapiens GN=GIMAP5 PE=2 SV=1                                                        | GIMA5_HUMAN | 35 kDa  | 1 | 0 | 0 | 0 |
| Cleavage and polyadenylation specificity factor subunit 6 OS=Homo sapiens GN=CPSF6 PE=1 SV=2                           | CPSF6_HUMAN | 59 kDa  | 1 | 0 | 0 | 0 |
| Grainyhead-like protein 2 homolog OS=Homo sapiens GN=GRHL2 PE=1 SV=1                                                   | GRHL2_HUMAN | 71 kDa  | 1 | 0 | 0 | 0 |
| Putative zinc finger protein 487 OS=Homo sapiens GN=ZNF487P PE=5 SV=3                                                  | ZN487_HUMAN | 52 kDa  | 1 | 0 | 0 | 0 |
| Transcription factor SOX-11 OS=Homo sapiens GN=SOX11 PE=1 SV=2                                                         | SOX11_HUMAN | 47 kDa  | 1 | 0 | 0 | 0 |
| ES1 protein homolog, mitochondrial OS=Homo sapiens GN=C21orf33 PE=1 SV=3                                               | ES1_HUMAN   | 28 kDa  | 1 | 0 | 0 | 0 |
| Transcription initiation factor TFIID subunit 3 OS=Homo sapiens GN=TAF3 PE=1 SV=1                                      | TAF3_HUMAN  | 104 kDa | 1 | 0 | 0 | 0 |
| Zinc finger protein 592 OS=Homo sapiens GN=ZNF592 PE=1 SV=2                                                            | ZN592_HUMAN | 138 kDa | 1 | 0 | 0 | 0 |
| Cell adhesion molecule-related/down-regulated by oncogenes OS=Homo sapiens GN=CDON PE=1 SV=2                           | CDON_HUMAN  | 139 kDa | 1 | 0 | 0 | 0 |
| Cytoplasmic dynein 1 light intermediate chain 1 OS=Homo sapiens GN=DYNC1L1 PE=1 SV=3                                   | DC1L1_HUMAN | 57 kDa  | 1 | 0 | 0 | 0 |
| TBC1 domain family member 22A OS=Homo sapiens GN=TBC1D22A PE=1 SV=2                                                    | TB22A_HUMAN | 59 kDa  | 1 | 0 | 0 | 0 |
| Condensin complex subunit 3 OS=Homo sapiens GN=NCAPG PE=1 SV=1                                                         | CND3_HUMAN  | 114 kDa | 1 | 0 | 0 | 0 |
| Keratin-associated protein 4-2 OS=Homo sapiens GN=KRTAP4-2 PE=2 SV=2                                                   | KRA42_HUMAN | 14 kDa  | 1 | 0 | 0 | 0 |
| Acyl-coenzyme A thioesterase 4 OS=Homo sapiens GN=ACOT4 PE=1 SV=2                                                      | ACOT4_HUMAN | 46 kDa  | 1 | 0 | 0 | 0 |
| Leucine-rich repeat transmembrane protein FLRT3 OS=Homo sapiens GN=FLRT3 PE=1 SV=1                                     | FLRT3_HUMAN | 73 kDa  | 1 | 0 | 0 | 0 |
| Acyl-CoA synthetase family member 2, mitochondrial OS=Homo sapiens GN=ACSF2 PE=1 SV=2                                  | ACSF2_HUMAN | 68 kDa  | 1 | 0 | 0 | 0 |
| Disintegrin and metalloproteinase domain-containing protein 28 OS=Homo sapiens GN=ADAM28 PE=2 SV=1                     | ADA28_HUMAN | 87 kDa  | 1 | 0 | 0 | 0 |
| AP-5 complex subunit beta-1 OS=Homo sapiens GN=AP5B1 PE=1 SV=4                                                         | AP5B1_HUMAN | 94 kDa  | 1 | 0 | 0 | 0 |
| Brother of CDO OS=Homo sapiens GN=BOC PE=1 SV=1                                                                        | BOC_HUMAN   | 121 kDa | 1 | 0 | 0 | 0 |
| Uncharacterized protein C1orf96 OS=Homo sapiens GN=C1orf96 PE=1 SV=2                                                   | CA096_HUMAN | 30 kDa  | 1 | 0 | 0 | 0 |
| Coiled-coil domain-containing protein 47 OS=Homo sapiens GN=CCDC47 PE=1 SV=1                                           | CCD47_HUMAN | 56 kDa  | 1 | 0 | 0 | 0 |
| Cyclin-dependent kinase 19 OS=Homo sapiens GN=CDK19 PE=1 SV=1                                                          | CDK19_HUMAN | 57 kDa  | 1 | 0 | 0 | 0 |
| Centrosomal protein of 120 kDa OS=Homo sapiens GN=CEP120 PE=2 SV=2                                                     | CE120_HUMAN | 113 kDa | 1 | 0 | 0 | 0 |
| Cytoskeleton-associated protein 4 OS=Homo sapiens GN=CKAP4 PE=1 SV=2                                                   | CKAP4_HUMAN | 66 kDa  | 1 | 0 | 0 | 0 |

|                                                                                                            |             |         |   |   |   |   |
|------------------------------------------------------------------------------------------------------------|-------------|---------|---|---|---|---|
| Protein FAM189B OS=Homo sapiens GN=FAM189B PE=1 SV=2                                                       | F189B_HUMAN | 71 kDa  | 1 | 0 | 0 | 0 |
| Integrin beta-5 OS=Homo sapiens GN=ITGB5 PE=1 SV=1                                                         | ITB5_HUMAN  | 88 kDa  | 1 | 0 | 0 | 0 |
| Histone acetyltransferase KAT2B OS=Homo sapiens GN=KAT2B PE=1 SV=3                                         | KAT2B_HUMAN | 93 kDa  | 1 | 0 | 0 | 0 |
| Kallikrein-1 OS=Homo sapiens GN=KLK1 PE=1 SV=2                                                             | KLK1_HUMAN  | 29 kDa  | 1 | 0 | 0 | 0 |
| Maternal embryonic leucine zipper kinase OS=Homo sapiens GN=MELK PE=1 SV=3                                 | MELK_HUMAN  | 75 kDa  | 1 | 0 | 0 | 0 |
| Dual specificity mitogen-activated protein kinase kinase 3 OS=Homo sapiens GN=MAP2K3 PE=1 SV=2             | MP2K3_HUMAN | 39 kDa  | 1 | 0 | 0 | 0 |
| Peroxisomal targeting signal 1 receptor OS=Homo sapiens GN=PEX5 PE=1 SV=3                                  | PEX5_HUMAN  | 71 kDa  | 1 | 0 | 0 | 0 |
| Prohibitin OS=Homo sapiens GN=PHB PE=1 SV=1                                                                | PHB_HUMAN   | 30 kDa  | 1 | 0 | 0 | 0 |
| Protein phosphatase 1J OS=Homo sapiens GN=PPM1J PE=1 SV=1                                                  | PPM1J_HUMAN | 55 kDa  | 1 | 0 | 0 | 0 |
| Protein phosphatase 1 regulatory subunit 29 OS=Homo sapiens GN=ELFN2 PE=1 SV=1                             | PPR29_HUMAN | 90 kDa  | 1 | 0 | 0 | 0 |
| GTP-binding protein Rhes OS=Homo sapiens GN=RASD2 PE=1 SV=1                                                | RHES_HUMAN  | 30 kDa  | 1 | 0 | 0 | 0 |
| X-linked retinitis pigmentosa GTPase regulator OS=Homo sapiens GN=RPGR PE=1 SV=2                           | RPGR_HUMAN  | 113 kDa | 1 | 0 | 0 | 0 |
| Solute carrier family 26 member 6 OS=Homo sapiens GN=SLC26A6 PE=1 SV=1                                     | S26A6_HUMAN | 83 kDa  | 1 | 0 | 0 | 0 |
| SH3 domain and tetratricopeptide repeat-containing protein 1 OS=Homo sapiens GN=SH3TC1 PE=1 SV=3           | S3TC1_HUMAN | 147 kDa | 1 | 0 | 0 | 0 |
| FACT complex subunit SSRP1 OS=Homo sapiens GN=SSRP1 PE=1 SV=1                                              | SSRP1_HUMAN | 81 kDa  | 1 | 0 | 0 | 0 |
| Transient receptor potential cation channel subfamily V member 4 OS=Homo sapiens GN=TRPV4 PE=1 SV=1        | TRPV4_HUMAN | 98 kDa  | 1 | 0 | 0 | 0 |
| Tetratricopeptide repeat protein 27 OS=Homo sapiens GN=TTC27 PE=1 SV=1                                     | TTC27_HUMAN | 97 kDa  | 1 | 0 | 0 | 0 |
| tRNA wybutosine-synthesizing protein 1 homolog B OS=Homo sapiens GN=TYW1B PE=2 SV=2                        | TYW1B_HUMAN | 77 kDa  | 1 | 0 | 0 | 0 |
| Zinc finger protein 264 OS=Homo sapiens GN=ZNF264 PE=1 SV=1                                                | ZN264_HUMAN | 71 kDa  | 1 | 0 | 0 | 0 |
| WD repeat-containing protein 47 OS=Homo sapiens GN=WDR47 PE=1 SV=1                                         | WDR47_HUMAN | 102 kDa | 1 | 0 | 0 | 0 |
| Clathrin interactor 1 OS=Homo sapiens GN=CLINT1 PE=1 SV=1                                                  | EPN4_HUMAN  | 68 kDa  | 1 | 0 | 0 | 0 |
| Transcription factor COE3 OS=Homo sapiens GN=EBF3 PE=1 SV=2                                                | COE3_HUMAN  | 65 kDa  | 1 | 0 | 0 | 0 |
| Connector enhancer of kinase suppressor of ras 1 OS=Homo sapiens GN=CNKSR1 PE=1 SV=1                       | CNKR1_HUMAN | 80 kDa  | 1 | 0 | 0 | 0 |
| Translation initiation factor eIF-2B subunit delta OS=Homo sapiens GN=EIF2B4 PE=1 SV=2                     | E12B8_HUMAN | 58 kDa  | 1 | 0 | 0 | 0 |
| Run domain Beclin-1 interacting and cystein-rich containing protein OS=Homo sapiens GN=KIAA0226 PE=1 SV=1  | RUBIC_HUMAN | 109 kDa | 1 | 0 | 0 | 0 |
| Gamma-tubulin complex component 4 OS=Homo sapiens GN=TUBGCP4 PE=1 SV=1                                     | GCP4_HUMAN  | 76 kDa  | 1 | 0 | 0 | 0 |
| Chromosome transmission fidelity protein 18 homolog OS=Homo sapiens GN=CTF18 PE=1 SV=1                     | CTF18_HUMAN | 107 kDa | 1 | 0 | 0 | 0 |
| Sterile alpha and TIR motif-containing protein 1 OS=Homo sapiens GN=SARM1 PE=1 SV=1                        | SARM1_HUMAN | 79 kDa  | 1 | 0 | 0 | 0 |
| Zinc finger protein 366 OS=Homo sapiens GN=ZNF366 PE=1 SV=1                                                | ZN366_HUMAN | 85 kDa  | 1 | 0 | 0 | 0 |
| Tripartite motif-containing protein 38 OS=Homo sapiens GN=TRIM38 PE=2 SV=1                                 | TR138_HUMAN | 53 kDa  | 1 | 0 | 0 | 0 |
| Transforming growth factor beta-2 OS=Homo sapiens GN=TGF2B PE=1 SV=1                                       | TGF2B_HUMAN | 48 kDa  | 1 | 0 | 0 | 0 |
| Tumor necrosis factor receptor superfamily member 6 OS=Homo sapiens GN=FAS PE=1 SV=1                       | TNR6_HUMAN  | 38 kDa  | 1 | 0 | 0 | 0 |
| mTERF domain-containing protein 1, mitochondrial OS=Homo sapiens GN=MTERFD1 PE=1 SV=2                      | MTER1_HUMAN | 48 kDa  | 1 | 0 | 0 | 0 |
| Proto-oncogene serine/threonine-protein kinase mos OS=Homo sapiens GN=MOS PE=2 SV=1                        | MOS_HUMAN   | 38 kDa  | 1 | 0 | 0 | 0 |
| Zinc finger protein 442 OS=Homo sapiens GN=ZNF442 PE=2 SV=1                                                | ZN442_HUMAN | 73 kDa  | 1 | 0 | 0 | 0 |
| GAS2-like protein 3 OS=Homo sapiens GN=GAS2L3 PE=1 SV=1                                                    | GA2L3_HUMAN | 75 kDa  | 1 | 0 | 0 | 0 |
| Serine/threonine-protein kinase Nek8 OS=Homo sapiens GN=NEK8 PE=1 SV=1                                     | NEK8_HUMAN  | 75 kDa  | 1 | 0 | 0 | 0 |
| Zinc finger CCH domain-containing protein 6 OS=Homo sapiens GN=ZC3H6 PE=2 SV=2                             | ZC3H6_HUMAN | 132 kDa | 1 | 0 | 0 | 0 |
| Dual specificity protein phosphatase 2 OS=Homo sapiens GN=DUSP2 PE=1 SV=1                                  | DUS2_HUMAN  | 34 kDa  | 1 | 0 | 0 | 0 |
| Coiled-coil domain-containing protein 37 OS=Homo sapiens GN=CCDC37 PE=1 SV=1                               | CCD37_HUMAN | 71 kDa  | 1 | 0 | 0 | 0 |
| Putative adenosylhomocysteinase 2 OS=Homo sapiens GN=AHCYL1 PE=1 SV=2                                      | SAHH2_HUMAN | 59 kDa  | 1 | 0 | 0 | 0 |
| H/ACA ribonucleoprotein complex subunit 1 OS=Homo sapiens GN=GAR1 PE=1 SV=1                                | GAR1_HUMAN  | 22 kDa  | 1 | 0 | 0 | 0 |
| ARF7 effector protein OS=Homo sapiens GN=C11orf46 PE=1 SV=1                                                | AR7EP_HUMAN | 29 kDa  | 1 | 0 | 0 | 0 |
| NLR family CARD domain-containing protein 4 OS=Homo sapiens GN=NLRC4 PE=2 SV=2                             | NLRC4_HUMAN | 116 kDa | 1 | 0 | 0 | 0 |
| WD repeat-containing protein 59 OS=Homo sapiens GN=WDR59 PE=1 SV=2                                         | WDR59_HUMAN | 110 kDa | 1 | 0 | 0 | 0 |
| Cell growth-regulating nucleolar protein OS=Homo sapiens GN=LYAR PE=1 SV=2                                 | LYAR_HUMAN  | 44 kDa  | 1 | 0 | 0 | 0 |
| Zinc finger protein 704 OS=Homo sapiens GN=ZNF704 PE=2 SV=1                                                | ZN704_HUMAN | 45 kDa  | 1 | 0 | 0 | 0 |
| Activin receptor type-2B OS=Homo sapiens GN=ACVR2B PE=1 SV=3                                               | AVR2B_HUMAN | 58 kDa  | 1 | 0 | 0 | 0 |
| Protein NPAT OS=Homo sapiens GN=NPAT PE=1 SV=3                                                             | NPAT_HUMAN  | 154 kDa | 1 | 0 | 0 | 0 |
| Zinc finger protein DPF3 OS=Homo sapiens GN=DPF3 PE=1 SV=3                                                 | DPF3_HUMAN  | 43 kDa  | 1 | 0 | 0 | 0 |
| THAP domain-containing protein 6 OS=Homo sapiens GN=THAP6 PE=2 SV=1                                        | THAP6_HUMAN | 26 kDa  | 1 | 0 | 0 | 0 |
| Sodium/hydrogen exchanger 10 OS=Homo sapiens GN=SLC9C1 PE=2 SV=2                                           | SL9C1_HUMAN | 135 kDa | 1 | 0 | 0 | 0 |
| Importin-5 OS=Homo sapiens GN=IPO5 PE=1 SV=4                                                               | IPO5_HUMAN  | 124 kDa | 1 | 0 | 0 | 0 |
| POM121-like protein 2 OS=Homo sapiens GN=POM121L2 PE=1 SV=1                                                | P12L2_HUMAN | 103 kDa | 1 | 0 | 0 | 0 |
| Neural retina-specific leucine zipper protein OS=Homo sapiens GN=NRL PE=1 SV=1                             | NRL_HUMAN   | 26 kDa  | 1 | 0 | 0 | 0 |
| DnaJ homolog subfamily B member 5 OS=Homo sapiens GN=DNAJB5 PE=1 SV=1                                      | DNB5_HUMAN  | 39 kDa  | 1 | 0 | 0 | 0 |
| PH and SEC7 domain-containing protein 3 OS=Homo sapiens GN=PSD3 PE=1 SV=2                                  | PSD3_HUMAN  | 116 kDa | 1 | 0 | 0 | 0 |
| Cyclic AMP-dependent transcription factor ATF-6 alpha OS=Homo sapiens GN=ATF6 PE=1 SV=3                    | ATF6A_HUMAN | 75 kDa  | 1 | 0 | 0 | 0 |
| Transcriptional repressor scratch 1 OS=Homo sapiens GN=SCRT1 PE=1 SV=1                                     | SCRT1_HUMAN | 36 kDa  | 1 | 0 | 0 | 0 |
| Acyl-coenzyme A thioesterase 2, mitochondrial OS=Homo sapiens GN=ACOT2 PE=1 SV=6                           | ACOT2_HUMAN | 53 kDa  | 1 | 0 | 0 | 0 |
| Protein L-Myc-1 OS=Homo sapiens GN=MYCL1 PE=1 SV=2                                                         | MYCL1_HUMAN | 40 kDa  | 1 | 0 | 0 | 0 |
| Leiomodin-3 OS=Homo sapiens GN=LMOD3 PE=2 SV=1                                                             | LMOD3_HUMAN | 65 kDa  | 1 | 0 | 0 | 0 |
| Liprin-alpha-2 OS=Homo sapiens GN=PPFIA2 PE=1 SV=2                                                         | LIPA2_HUMAN | 143 kDa | 1 | 0 | 0 | 0 |
| Sarcosine dehydrogenase, mitochondrial OS=Homo sapiens GN=SARDH PE=1 SV=1                                  | SARDH_HUMAN | 101 kDa | 1 | 0 | 0 | 0 |
| Receptor-type tyrosine-protein phosphatase T OS=Homo sapiens GN=PTPRT PE=1 SV=6                            | PTPRT_HUMAN | 162 kDa | 1 | 0 | 0 | 0 |
| Developmental pluripotency-associated protein 2 OS=Homo sapiens GN=DPPA2 PE=2 SV=2                         | DPPA2_HUMAN | 34 kDa  | 1 | 0 | 0 | 0 |
| Uncharacterized protein C11orf95 OS=Homo sapiens GN=C11orf95 PE=2 SV=1                                     | CK095_HUMAN | 73 kDa  | 1 | 0 | 0 | 0 |
| Rod cGMP-specific 3',5'-cyclic phosphodiesterase subunit alpha OS=Homo sapiens GN=PDE6A PE=1 SV=4          | PDE6A_HUMAN | 100 kDa | 1 | 0 | 0 | 0 |
| Junctophilin-1 OS=Homo sapiens GN=JPH1 PE=1 SV=2                                                           | JPH1_HUMAN  | 72 kDa  | 1 | 0 | 0 | 0 |
| ATP-sensitive inward rectifier potassium channel 14 OS=Homo sapiens GN=KCNJ14 PE=1 SV=1                    | IRK14_HUMAN | 48 kDa  | 1 | 0 | 0 | 0 |
| Codanin-1 OS=Homo sapiens GN=CDAN1 PE=1 SV=4                                                               | CDAN1_HUMAN | 134 kDa | 1 | 0 | 0 | 0 |
| Charged multivesicular body protein 7 OS=Homo sapiens GN=CHMP7 PE=1 SV=1                                   | CHMP7_HUMAN | 51 kDa  | 1 | 0 | 0 | 0 |
| ATP-dependent Clp protease ATP-binding subunit clpX-like, mitochondrial OS=Homo sapiens GN=CLPX1 PE=1 SV=1 | CLPX1_HUMAN | 69 kDa  | 1 | 0 | 0 | 0 |
| Putative uncharacterized protein C10orf40 OS=Homo sapiens GN=C10orf40 PE=2 SV=1                            | CJ040_HUMAN | 15 kDa  | 1 | 0 | 0 | 0 |
| Peroxidasin-like protein OS=Homo sapiens GN=PXDN1 PE=2 SV=3                                                | PXDNL_HUMAN | 164 kDa | 1 | 0 | 0 | 0 |
| Serpin B9 OS=Homo sapiens GN=SERPINB9 PE=1 SV=1                                                            | SPB9_HUMAN  | 42 kDa  | 1 | 0 | 0 | 0 |
| Exonuclease GOR OS=Homo sapiens GN=REXO111 PE=2 SV=2                                                       | GOR_HUMAN   | 74 kDa  | 1 | 0 | 0 | 0 |
| RNA pseudouridylate synthase domain-containing protein 4 OS=Homo sapiens GN=RPUSD4 PE=2 SV=1               | RUSD4_HUMAN | 42 kDa  | 1 | 0 | 0 | 1 |
| PEX5-related protein OS=Homo sapiens GN=PEX5L PE=1 SV=2                                                    | PEX5R_HUMAN | 70 kDa  | 1 | 1 | 0 | 0 |
| Protein FAM117B OS=Homo sapiens GN=FAM117B PE=1 SV=2                                                       | F117B_HUMAN | 62 kDa  | 1 | 0 | 1 | 0 |
| 60S ribosomal protein L30 OS=Homo sapiens GN=RPL30 PE=1 SV=2                                               | RL30_HUMAN  | 13 kDa  | 1 | 0 | 1 | 0 |
| 40S ribosomal protein S18 OS=Homo sapiens GN=RPS18 PE=1 SV=3                                               | RS18_HUMAN  | 18 kDa  | 1 | 0 | 1 | 0 |

|                                                                                                                                  |             |         |   |   |   |   |
|----------------------------------------------------------------------------------------------------------------------------------|-------------|---------|---|---|---|---|
| Zinc finger protein 354B OS=Homo sapiens GN=ZNF354B PE=2 SV=1                                                                    | Z354B_HUMAN | 71 kDa  | 1 | 0 | 0 | 1 |
| Arginyl aminopeptidase-like 1 OS=Homo sapiens GN=RNPEPL1 PE=2 SV=2                                                               | RNPL1_HUMAN | 56 kDa  | 1 | 0 | 1 | 0 |
| Filamin-C OS=Homo sapiens GN=FLNC PE=1 SV=3                                                                                      | FLNC_HUMAN  | 291 kDa | 1 | 0 | 0 | 1 |
| Neuronal acetylcholine receptor subunit alpha-9 OS=Homo sapiens GN=CHRNA9 PE=1 SV=2                                              | ACHA9_HUMAN | 55 kDa  | 1 | 1 | 0 | 0 |
| Aspartate beta-hydroxylase domain-containing protein 1 OS=Homo sapiens GN=ASPHD1 PE=1 SV=3                                       | ASPH1_HUMAN | 41 kDa  | 1 | 0 | 1 | 0 |
| Ceruloplasmin OS=Homo sapiens GN=CP PE=1 SV=1                                                                                    | CERU_HUMAN  | 122 kDa | 1 | 1 | 0 | 0 |
| Iron-sulfur protein NUBPL OS=Homo sapiens GN=NUBPL PE=1 SV=3                                                                     | NUBPL_HUMAN | 34 kDa  | 1 | 0 | 0 | 1 |
| Leucine-rich repeat, immunoglobulin-like domain and transmembrane domain-containing protein 2 OS=Homo sapiens GN=LRIT2 PE=1 SV=1 | LRIT2_HUMAN | 60 kDa  | 1 | 0 | 0 | 1 |
| A disintegrin and metalloproteinase with thrombospondin motifs 1 OS=Homo sapiens GN=ADAMTS1 PE=1 SV=1                            | ATS1_HUMAN  | 105 kDa | 1 | 1 | 0 | 0 |
| Extended synaptotagmin-1 OS=Homo sapiens GN=ESYT1 PE=1 SV=1                                                                      | ESYT1_HUMAN | 123 kDa | 1 | 0 | 0 | 1 |
| Zinc finger protein 787 OS=Homo sapiens GN=ZNF787 PE=1 SV=2                                                                      | ZN787_HUMAN | 40 kDa  | 1 | 1 | 0 | 0 |
| Hephaestin OS=Homo sapiens GN=HEPH PE=2 SV=3                                                                                     | HEPH_HUMAN  | 130 kDa | 1 | 1 | 0 | 0 |
| Inositol-pentakisphosphate 2-kinase OS=Homo sapiens GN=IPPK PE=1 SV=1                                                            | IPPK_HUMAN  | 56 kDa  | 1 | 0 | 0 | 1 |
| Putative stereocilin-like protein OS=Homo sapiens GN=STRCP1 PE=5 SV=1                                                            | STRCL_HUMAN | 192 kDa | 1 | 0 | 0 | 0 |
| Nuclear pore complex protein Nup50 OS=Homo sapiens GN=NUP50 PE=1 SV=2                                                            | NUP50_HUMAN | 50 kDa  | 1 | 0 | 1 | 0 |
| SUMO-activating enzyme subunit 1 OS=Homo sapiens GN=SAE1 PE=1 SV=1                                                               | SAE1_HUMAN  | 38 kDa  | 1 | 0 | 0 | 0 |
| FAST kinase domain-containing protein 5 OS=Homo sapiens GN=FASTKD5 PE=1 SV=1                                                     | FAKD5_HUMAN | 87 kDa  | 1 | 0 | 0 | 0 |
| Protein arginine N-methyltransferase 7 OS=Homo sapiens GN=PRMT7 PE=1 SV=1                                                        | ANMT7_HUMAN | 78 kDa  | 1 | 0 | 0 | 0 |
| Glutathione reductase, mitochondrial OS=Homo sapiens GN=GSR PE=1 SV=2                                                            | GSHR_HUMAN  | 56 kDa  | 1 | 0 | 0 | 0 |
| Macrophage erythroblast attacker OS=Homo sapiens GN=MAEA PE=1 SV=1                                                               | MAEA_HUMAN  | 45 kDa  | 1 | 0 | 0 | 0 |
| Ubiquitin-specific peptidase-like protein 1 OS=Homo sapiens GN=USPL1 PE=2 SV=1                                                   | USPL1_HUMAN | 120 kDa | 1 | 0 | 0 | 0 |
| R-spondin-4 OS=Homo sapiens GN=RSPO4 PE=1 SV=2                                                                                   | RSPO4_HUMAN | 26 kDa  | 1 | 0 | 0 | 0 |
| Tetratricopeptide repeat protein 19, mitochondrial OS=Homo sapiens GN=TTC19 PE=1 SV=4                                            | TTC19_HUMAN | 42 kDa  | 1 | 0 | 0 | 0 |
| Roquin OS=Homo sapiens GN=RC3H1 PE=1 SV=1                                                                                        | RC3H1_HUMAN | 126 kDa | 1 | 0 | 0 | 0 |
| Interleukin-6 receptor subunit alpha OS=Homo sapiens GN=IL6R PE=1 SV=1                                                           | IL6RA_HUMAN | 52 kDa  | 1 | 0 | 0 | 0 |
| Solute carrier family 2, facilitated glucose transporter member 14 OS=Homo sapiens GN=SLC2A14 PE=2 SV=1                          | GTR14_HUMAN | 56 kDa  | 1 | 0 | 0 | 0 |
| Late cornified envelope protein 3C OS=Homo sapiens GN=LCE3C PE=2 SV=1                                                            | LCE3C_HUMAN | 10 kDa  | 1 | 0 | 0 | 0 |
| Adenylate kinase 7 OS=Homo sapiens GN=AK7 PE=1 SV=3                                                                              | KAD7_HUMAN  | 83 kDa  | 1 | 0 | 0 | 0 |
| Tax1-binding protein 3 OS=Homo sapiens GN=TAX1BP3 PE=1 SV=2                                                                      | TX1B3_HUMAN | 14 kDa  | 1 | 0 | 0 | 0 |
| Golgin subfamily A member 6A OS=Homo sapiens GN=GOLGA6A PE=1 SV=3                                                                | GOG6A_HUMAN | 80 kDa  | 1 | 0 | 0 | 0 |
| Peroxiredoxin-4 OS=Homo sapiens GN=PRDX4 PE=1 SV=1                                                                               | PRDX4_HUMAN | 31 kDa  | 1 | 0 | 0 | 0 |
| Transcription factor GATA-6 OS=Homo sapiens GN=GATA6 PE=1 SV=2                                                                   | GATA6_HUMAN | 60 kDa  | 1 | 0 | 0 | 0 |
| Short-chain dehydrogenase/reductase 3 OS=Homo sapiens GN=DHRS3 PE=1 SV=2                                                         | DHRS3_HUMAN | 34 kDa  | 1 | 0 | 0 | 0 |
| Serine/threonine-protein phosphatase 4 regulatory subunit 3A OS=Homo sapiens GN=SMEK1 PE=1 SV=1                                  | P4R3A_HUMAN | 95 kDa  | 1 | 0 | 0 | 0 |
| Tubulointerstitial nephritis antigen-like OS=Homo sapiens GN=TINAGL1 PE=1 SV=1                                                   | TINAL_HUMAN | 52 kDa  | 1 | 0 | 0 | 0 |
| MAP3K12-binding inhibitory protein 1 OS=Homo sapiens GN=MBIP PE=1 SV=2                                                           | MBIP1_HUMAN | 39 kDa  | 1 | 0 | 0 | 0 |
| Transmembrane protein 132C OS=Homo sapiens GN=TMEM132C PE=2 SV=3                                                                 | T132C_HUMAN | 122 kDa | 1 | 0 | 0 | 0 |
| Keratin-associated protein 10-6 OS=Homo sapiens GN=KRTAP10-6 PE=2 SV=2                                                           | KR106_HUMAN | 37 kDa  | 1 | 0 | 0 | 0 |
| Target of rapamycin complex 2 subunit MAPKAP1 OS=Homo sapiens GN=MAPKAP1 PE=1 SV=2                                               | SIN1_HUMAN  | 59 kDa  | 1 | 0 | 0 | 0 |
| Bifunctional ATP-dependent dihydroxyacetone kinase/FAD-AMP lyase (cycling) OS=Homo sapiens GN=DHAK PE=1 SV=1                     | DHAK_HUMAN  | 59 kDa  | 1 | 0 | 0 | 0 |
| HAUS augmin-like complex subunit 2 OS=Homo sapiens GN=HAUS2 PE=1 SV=1                                                            | HAUS2_HUMAN | 27 kDa  | 1 | 0 | 0 | 0 |
| 40S ribosomal protein S15a OS=Homo sapiens GN=RPS15A PE=1 SV=2                                                                   | RS15A_HUMAN | 15 kDa  | 1 | 0 | 0 | 0 |
| Serine/arginine-rich splicing factor 2 OS=Homo sapiens GN=SRSF2 PE=1 SV=4                                                        | SRSF2_HUMAN | 25 kDa  | 1 | 0 | 0 | 0 |
| Proenkephalin-A OS=Homo sapiens GN=PENK PE=1 SV=1                                                                                | PENK_HUMAN  | 31 kDa  | 1 | 0 | 0 | 0 |
| Paired box protein Pax-2 OS=Homo sapiens GN=PAX2 PE=1 SV=4                                                                       | PAX2_HUMAN  | 45 kDa  | 1 | 0 | 0 | 0 |
| Putative protein FAM48B2 OS=Homo sapiens GN=FAM48B2 PE=5 SV=1                                                                    | F48B2_HUMAN | 88 kDa  | 1 | 0 | 0 | 0 |
| Arylsulfatase D OS=Homo sapiens GN=ARSD PE=1 SV=2                                                                                | ARSD_HUMAN  | 65 kDa  | 1 | 0 | 0 | 0 |
| Serine/threonine-protein kinase pim-1 OS=Homo sapiens GN=PIM1 PE=1 SV=3                                                          | PIM1_HUMAN  | 45 kDa  | 1 | 0 | 0 | 0 |
| RUN and FYVE domain-containing protein 4 OS=Homo sapiens GN=RUFY4 PE=2 SV=2                                                      | RUFY4_HUMAN | 64 kDa  | 1 | 0 | 0 | 0 |
| Zinc finger protein 750 OS=Homo sapiens GN=ZNF750 PE=1 SV=1                                                                      | ZN750_HUMAN | 77 kDa  | 1 | 0 | 0 | 0 |
| Rho GTPase-activating protein 21 OS=Homo sapiens GN=ARHGAP21 PE=1 SV=1                                                           | RHG21_HUMAN | 217 kDa | 1 | 0 | 0 | 0 |
| Protein FAM111B OS=Homo sapiens GN=FAM111B PE=2 SV=1                                                                             | F111B_HUMAN | 85 kDa  | 1 | 0 | 0 | 0 |
| P-selectin OS=Homo sapiens GN=SELP PE=1 SV=3                                                                                     | LYAM3_HUMAN | 91 kDa  | 1 | 0 | 0 | 0 |
| Src substrate cortactin OS=Homo sapiens GN=CTTN PE=1 SV=2                                                                        | SRC8_HUMAN  | 62 kDa  | 1 | 0 | 0 | 0 |
| Inhibitor of growth protein 4 OS=Homo sapiens GN=ING4 PE=1 SV=1                                                                  | ING4_HUMAN  | 29 kDa  | 1 | 0 | 0 | 0 |
| Surfeit locus protein 4 OS=Homo sapiens GN=SURF4 PE=1 SV=3                                                                       | SURF4_HUMAN | 30 kDa  | 1 | 0 | 0 | 0 |
| 40S ribosomal protein S2 OS=Homo sapiens GN=RPS2 PE=1 SV=2                                                                       | RS2_HUMAN   | 31 kDa  | 1 | 0 | 0 | 0 |
| Beta-1,3-galactosyltransferase 6 OS=Homo sapiens GN=B3GALT6 PE=2 SV=2                                                            | B3GT6_HUMAN | 37 kDa  | 1 | 0 | 0 | 0 |
| Nuclear cap-binding protein subunit 1 OS=Homo sapiens GN=NCBP1 PE=1 SV=1                                                         | NCBP1_HUMAN | 92 kDa  | 1 | 0 | 0 | 0 |
| ATP-binding cassette sub-family D member 3 OS=Homo sapiens GN=ABCD3 PE=1 SV=1                                                    | ABCD3_HUMAN | 75 kDa  | 1 | 0 | 0 | 0 |
| Angiotensin-converting enzyme 2 OS=Homo sapiens GN=ACE2 PE=1 SV=2                                                                | ACE2_HUMAN  | 92 kDa  | 1 | 0 | 0 | 0 |
| Arf-GAP with GTPase, ANK repeat and PH domain-containing protein 10 OS=Homo sapiens GN=AGA10 PE=1 SV=1                           | AGA10_HUMAN | 73 kDa  | 1 | 0 | 0 | 0 |
| Ankyrin repeat and zinc finger domain-containing protein 1 OS=Homo sapiens GN=ANKZF1 PE=1 SV=1                                   | ANKZ1_HUMAN | 81 kDa  | 1 | 0 | 0 | 0 |
| Amyloid beta A4 precursor protein-binding family A member 1 OS=Homo sapiens GN=APBA1 PE=1 SV=3                                   | APBA1_HUMAN | 93 kDa  | 1 | 0 | 0 | 0 |
| Rho guanine nucleotide exchange factor 4 OS=Homo sapiens GN=ARHGEF4 PE=1 SV=3                                                    | ARHG4_HUMAN | 79 kDa  | 1 | 0 | 0 | 0 |
| Brain acid soluble protein 1 OS=Homo sapiens GN=BASP1 PE=1 SV=2                                                                  | BASP1_HUMAN | 23 kDa  | 1 | 0 | 0 | 0 |
| Baculoviral IAP repeat-containing protein 3 OS=Homo sapiens GN=BIRC3 PE=1 SV=2                                                   | BIRC3_HUMAN | 68 kDa  | 1 | 0 | 0 | 0 |
| Baculoviral IAP repeat-containing protein 8 OS=Homo sapiens GN=BIRC8 PE=1 SV=2                                                   | BIRC8_HUMAN | 27 kDa  | 1 | 0 | 0 | 0 |
| Coiled-coil domain-containing protein 70 OS=Homo sapiens GN=CCDC70 PE=2 SV=1                                                     | CCD70_HUMAN | 29 kDa  | 1 | 0 | 0 | 0 |
| CD59 glycoprotein OS=Homo sapiens GN=CD59 PE=1 SV=1                                                                              | CD59_HUMAN  | 14 kDa  | 1 | 0 | 0 | 0 |
| Chondroitin sulfate N-acetylgalactosaminyltransferase 2 OS=Homo sapiens GN=CSGALNACT2 PE=2 SV=1                                  | CGAT2_HUMAN | 63 kDa  | 1 | 0 | 0 | 0 |
| Uncharacterized protein C10orf82 OS=Homo sapiens GN=C10orf82 PE=2 SV=2                                                           | CJ082_HUMAN | 26 kDa  | 1 | 0 | 0 | 0 |
| Collagen alpha-2(VI) chain OS=Homo sapiens GN=COL6A2 PE=1 SV=4                                                                   | CO6A2_HUMAN | 109 kDa | 1 | 0 | 0 | 0 |
| Coatomer subunit delta OS=Homo sapiens GN=ARCN1 PE=1 SV=1                                                                        | COPD_HUMAN  | 57 kDa  | 1 | 0 | 0 | 0 |
| Cytokine receptor-like factor 1 OS=Homo sapiens GN=CRLF1 PE=1 SV=1                                                               | CRLF1_HUMAN | 46 kDa  | 1 | 0 | 0 | 0 |
| Cullin-4B OS=Homo sapiens GN=CUL4B PE=1 SV=4                                                                                     | CUL4B_HUMAN | 104 kDa | 1 | 0 | 0 | 0 |
| Gap junction beta-4 protein OS=Homo sapiens GN=GJB4 PE=1 SV=1                                                                    | CX84_HUMAN  | 30 kDa  | 1 | 0 | 0 | 0 |
| DNA (cytosine-5)-methyltransferase 3-like OS=Homo sapiens GN=DNMT3L PE=1 SV=3                                                    | DNM3L_HUMAN | 44 kDa  | 1 | 0 | 0 | 0 |
| Trifunctional enzyme subunit beta, mitochondrial OS=Homo sapiens GN=HADHB PE=1 SV=3                                              | ECHB_HUMAN  | 51 kDa  | 1 | 0 | 0 | 0 |
| Enoyl-CoA hydratase, mitochondrial OS=Homo sapiens GN=ECHS1 PE=1 SV=4                                                            | ECHM_HUMAN  | 31 kDa  | 1 | 0 | 0 | 0 |
| EMILIN-3 OS=Homo sapiens GN=EMILIN3 PE=2 SV=2                                                                                    | EMIL3_HUMAN | 83 kDa  | 1 | 0 | 0 | 0 |
| FGFR1 oncogene partner OS=Homo sapiens GN=FGFR1OP PE=1 SV=1                                                                      | FR1OP_HUMAN | 43 kDa  | 1 | 0 | 0 | 0 |

|                                                                                                             |             |         |   |   |   |   |
|-------------------------------------------------------------------------------------------------------------|-------------|---------|---|---|---|---|
| Fibronectin type III and SPRY domain-containing protein 1 OS=Homo sapiens GN=FSD1 PE=1 SV=1                 | FSD1_HUMAN  | 56 kDa  | 1 | 0 | 0 | 0 |
| Growth/differentiation factor 11 OS=Homo sapiens GN=GDF11 PE=2 SV=1                                         | GDF11_HUMAN | 45 kDa  | 1 | 0 | 0 | 0 |
| G-protein coupled receptor 35 OS=Homo sapiens GN=GPR35 PE=2 SV=4                                            | GPR35_HUMAN | 34 kDa  | 1 | 0 | 0 | 0 |
| Granzyme M OS=Homo sapiens GN=GZMM PE=1 SV=2                                                                | GRAM_HUMAN  | 28 kDa  | 1 | 0 | 0 | 0 |
| Headcase protein homolog OS=Homo sapiens GN=HECA PE=1 SV=1                                                  | HDC_HUMAN   | 59 kDa  | 1 | 0 | 0 | 0 |
| HLA class I histocompatibility antigen, alpha chain G OS=Homo sapiens GN=HLA-G PE=1 SV=1                    | HLA_G_HUMAN | 38 kDa  | 1 | 0 | 0 | 0 |
| Putative HERC2-like protein 3 OS=Homo sapiens GN=HERC2P3 PE=5 SV=2                                          | HRC23_HUMAN | 129 kDa | 1 | 0 | 0 | 0 |
| Homeobox protein Hox-B13 OS=Homo sapiens GN=HOXB13 PE=1 SV=2                                                | HXB13_HUMAN | 31 kDa  | 1 | 0 | 0 | 0 |
| Immediate early response gene 5 protein OS=Homo sapiens GN=IER5 PE=2 SV=3                                   | IER5_HUMAN  | 34 kDa  | 1 | 0 | 0 | 0 |
| Ig gamma-3 chain C region OS=Homo sapiens GN=IGHG3 PE=1 SV=2                                                | IGHG3_HUMAN | 41 kDa  | 1 | 0 | 0 | 0 |
| Interleukin enhancer-binding factor 2 OS=Homo sapiens GN=ILF2 PE=1 SV=2                                     | ILF2_HUMAN  | 43 kDa  | 1 | 0 | 0 | 0 |
| Uncharacterized coiled-coil domain-containing protein KIAA1984 OS=Homo sapiens GN=KIAA1984 PE=2 SV=2        | K1984_HUMAN | 63 kDa  | 1 | 0 | 0 | 0 |
| Lysine-specific histone demethylase 1A OS=Homo sapiens GN=KDM1A PE=1 SV=2                                   | KDM1A_HUMAN | 93 kDa  | 1 | 0 | 0 | 0 |
| Ribosomal protein S6 kinase alpha-6 OS=Homo sapiens GN=RPS6KA6 PE=1 SV=1                                    | KS6A6_HUMAN | 84 kDa  | 1 | 0 | 0 | 0 |
| Lysosome-associated membrane glycoprotein 3 OS=Homo sapiens GN=LAMP3 PE=1 SV=3                              | LAMP3_HUMAN | 44 kDa  | 1 | 0 | 0 | 0 |
| LON peptidase N-terminal domain and RING finger protein 1 OS=Homo sapiens GN=LONRF1 PE=2 SV=2               | LONF1_HUMAN | 87 kDa  | 1 | 0 | 0 | 0 |
| Mastermind-like protein 1 OS=Homo sapiens GN=MAML1 PE=1 SV=3                                                | MAML1_HUMAN | 108 kDa | 1 | 0 | 0 | 0 |
| Cell surface glycoprotein CD200 receptor 2 OS=Homo sapiens GN=CD200R1L PE=2 SV=2                            | MO2R2_HUMAN | 30 kDa  | 1 | 0 | 0 | 0 |
| tRNA dimethylallyltransferase, mitochondrial OS=Homo sapiens GN=TRIT1 PE=1 SV=1                             | MOD5_HUMAN  | 53 kDa  | 1 | 0 | 0 | 0 |
| Myeloid-associated differentiation marker OS=Homo sapiens GN=MYADM PE=1 SV=2                                | MYADM_HUMAN | 35 kDa  | 1 | 0 | 0 | 0 |
| Putative myosin light chain kinase 3 OS=Homo sapiens GN=MYLK3 PE=2 SV=3                                     | MYLK3_HUMAN | 88 kDa  | 1 | 0 | 0 | 0 |
| Sodium leak channel non-selective protein OS=Homo sapiens GN=NALCN PE=1 SV=1                                | NALCN_HUMAN | 200 kDa | 1 | 0 | 0 | 0 |
| Transcriptional repressor p66-beta OS=Homo sapiens GN=GATAD2B PE=1 SV=1                                     | P66B_HUMAN  | 65 kDa  | 1 | 0 | 0 | 0 |
| Proprotein convertase subtilisin/kexin type 4 OS=Homo sapiens GN=PCSK4 PE=2 SV=2                            | PCSK4_HUMAN | 83 kDa  | 1 | 0 | 0 | 0 |
| Serine/threonine-protein phosphatase 6 catalytic subunit OS=Homo sapiens GN=PPP6C PE=1 SV=1                 | PPP6_HUMAN  | 35 kDa  | 1 | 0 | 0 | 0 |
| Rab-like protein 5 OS=Homo sapiens GN=RABL5 PE=2 SV=1                                                       | RABL5_HUMAN | 21 kDa  | 1 | 0 | 0 | 0 |
| Receptor expression-enhancing protein 2 OS=Homo sapiens GN=REEP2 PE=2 SV=2                                  | REEP2_HUMAN | 28 kDa  | 1 | 0 | 0 | 0 |
| Rho-related GTP-binding protein RhoF OS=Homo sapiens GN=RHOF PE=2 SV=1                                      | RHOF_HUMAN  | 24 kDa  | 1 | 0 | 0 | 0 |
| 60S ribosomal protein L10-like OS=Homo sapiens GN=RPL10L PE=1 SV=3                                          | RL10L_HUMAN | 25 kDa  | 1 | 0 | 0 | 0 |
| Ribosomal RNA-processing protein 7 homolog A OS=Homo sapiens GN=RRP7A PE=1 SV=2                             | RRP7A_HUMAN | 32 kDa  | 1 | 0 | 0 | 0 |
| Sarcoma antigen 1 OS=Homo sapiens GN=SAGE1 PE=2 SV=2                                                        | SAGE1_HUMAN | 99 kDa  | 1 | 0 | 0 | 0 |
| Short stature homeobox protein 2 OS=Homo sapiens GN=SHOX2 PE=2 SV=4                                         | SHOX2_HUMAN | 35 kDa  | 1 | 0 | 0 | 0 |
| Solute carrier organic anion transporter family member 1A2 OS=Homo sapiens GN=SLCO1A2 PE=2 SV=1             | SO1A2_HUMAN | 74 kDa  | 1 | 0 | 0 | 0 |
| Taste receptor type 2 member 41 OS=Homo sapiens GN=TAS2R41 PE=2 SV=2                                        | T2R41_HUMAN | 36 kDa  | 1 | 0 | 0 | 0 |
| Treacle protein OS=Homo sapiens GN=TCOF1 PE=1 SV=3                                                          | TCOF_HUMAN  | 152 kDa | 1 | 0 | 0 | 0 |
| Tudor domain-containing protein 6 OS=Homo sapiens GN=TDRD6 PE=2 SV=2                                        | TDRD6_HUMAN | 237 kDa | 1 | 0 | 0 | 0 |
| Transmembrane emp24 domain-containing protein 10 OS=Homo sapiens GN=TMED10 PE=1 SV=2                        | TMEDA_HUMAN | 25 kDa  | 1 | 0 | 0 | 0 |
| Torsin-4A OS=Homo sapiens GN=TOR4A PE=1 SV=2                                                                | TOR4A_HUMAN | 47 kDa  | 1 | 0 | 0 | 0 |
| TOX high mobility group box family member 2 OS=Homo sapiens GN=TOX2 PE=2 SV=2                               | TOX2_HUMAN  | 52 kDa  | 1 | 0 | 0 | 0 |
| Tetratricopeptide repeat protein 8 OS=Homo sapiens GN=TTC8 PE=1 SV=2                                        | TTC8_HUMAN  | 62 kDa  | 1 | 0 | 0 | 0 |
| Vam6/Vps39-like protein OS=Homo sapiens GN=VPS39 PE=1 SV=2                                                  | VPS39_HUMAN | 102 kDa | 1 | 0 | 0 | 0 |
| Zinc finger protein 92 homolog OS=Homo sapiens GN=ZFP92 PE=2 SV=3                                           | ZFP92_HUMAN | 46 kDa  | 1 | 0 | 0 | 0 |
| Zinc finger protein 260 OS=Homo sapiens GN=ZNF260 PE=2 SV=3                                                 | ZN260_HUMAN | 47 kDa  | 1 | 0 | 0 | 0 |
| Zinc finger protein 773 OS=Homo sapiens GN=ZNF773 PE=2 SV=1                                                 | ZN773_HUMAN | 51 kDa  | 1 | 0 | 0 | 0 |
| Zinc finger protein 683 OS=Homo sapiens GN=ZNF683 PE=2 SV=3                                                 | ZN683_HUMAN | 57 kDa  | 1 | 0 | 0 | 0 |
| Protein FAM26D OS=Homo sapiens GN=FAM26D PE=1 SV=1                                                          | FA26D_HUMAN | 35 kDa  | 1 | 0 | 0 | 0 |
| Vang-like protein 1 OS=Homo sapiens GN=VANGL1 PE=1 SV=1                                                     | VANG1_HUMAN | 60 kDa  | 1 | 0 | 0 | 0 |
| UDP-GlcNAc:betaGal beta-1,3-N-acetylglucosaminyltransferase-like protein 1 OS=Homo sapiens GN=B3GNL         | B3GNL_HUMAN | 41 kDa  | 1 | 0 | 0 | 0 |
| Unconventional myosin-Ih OS=Homo sapiens GN=MYO1H PE=2 SV=2                                                 | MYO1H_HUMAN | 119 kDa | 1 | 0 | 0 | 0 |
| Cysteine and glycine-rich protein 1 OS=Homo sapiens GN=CSR1 PE=1 SV=3                                       | CSR1_HUMAN  | 21 kDa  | 1 | 0 | 0 | 0 |
| Coagulation factor IX OS=Homo sapiens GN=F9 PE=1 SV=2                                                       | FA9_HUMAN   | 52 kDa  | 1 | 0 | 0 | 0 |
| E3 ubiquitin-protein ligase TRIM31 OS=Homo sapiens GN=TRIM31 PE=1 SV=2                                      | TRI31_HUMAN | 48 kDa  | 1 | 0 | 0 | 0 |
| Cytochrome P450 1B1 OS=Homo sapiens GN=CYP1B1 PE=1 SV=2                                                     | CP1B1_HUMAN | 61 kDa  | 1 | 0 | 0 | 0 |
| Growth/differentiation factor 6 OS=Homo sapiens GN=GDF6 PE=1 SV=1                                           | GDF6_HUMAN  | 51 kDa  | 1 | 0 | 0 | 0 |
| GNDF-inducible zinc finger protein 1 OS=Homo sapiens GN=GZF1 PE=1 SV=1                                      | GZF1_HUMAN  | 80 kDa  | 1 | 0 | 0 | 0 |
| SWI/SNF-related matrix-associated actin-dependent regulator of chromatin subfamily E member 1-related HM20B | HM20B_HUMAN | 36 kDa  | 1 | 0 | 0 | 0 |
| Transient receptor potential cation channel subfamily M member 8 OS=Homo sapiens GN=TRPM8 PE=2 SV=2         | TRPM8_HUMAN | 128 kDa | 1 | 0 | 0 | 0 |
| Enoyl-CoA delta isomerase 2, mitochondrial OS=Homo sapiens GN=ECI2 PE=1 SV=4                                | ECI2_HUMAN  | 44 kDa  | 1 | 0 | 0 | 0 |
| Mannose-1-phosphate guanylttransferase alpha OS=Homo sapiens GN=GMPPA PE=1 SV=1                             | GMPPA_HUMAN | 46 kDa  | 1 | 0 | 0 | 0 |
| Zinc finger protein 654 OS=Homo sapiens GN=ZNF654 PE=1 SV=3                                                 | ZN654_HUMAN | 66 kDa  | 1 | 0 | 0 | 0 |
| Prefoldin subunit 6 OS=Homo sapiens GN=PFDN6 PE=1 SV=1                                                      | PFD6_HUMAN  | 15 kDa  | 1 | 0 | 0 | 0 |
| Protein FAM53B OS=Homo sapiens GN=FAM53B PE=1 SV=2                                                          | FA53B_HUMAN | 46 kDa  | 1 | 0 | 0 | 0 |
| Serpin B12 OS=Homo sapiens GN=SERP1NB12 PE=1 SV=1                                                           | SPB12_HUMAN | 46 kDa  | 1 | 0 | 0 | 0 |
| BTB/POZ domain-containing protein KCTD21 OS=Homo sapiens GN=KCTD21 PE=2 SV=1                                | KCD21_HUMAN | 30 kDa  | 1 | 0 | 0 | 0 |
| Basigin OS=Homo sapiens GN=BSG PE=1 SV=2                                                                    | BASI_HUMAN  | 42 kDa  | 1 | 0 | 0 | 0 |
| Serine/threonine-protein phosphatase 2A regulatory subunit B'' subunit beta OS=Homo sapiens GN=PPP2R3B      | P2R3B_HUMAN | 65 kDa  | 1 | 0 | 0 | 0 |
| Ligand of Numb protein X 2 OS=Homo sapiens GN=LNX2 PE=1 SV=1                                                | LNX2_HUMAN  | 76 kDa  | 1 | 0 | 0 | 0 |
| Cytochrome P450 3A4 OS=Homo sapiens GN=CYP3A4 PE=1 SV=4                                                     | CP3A4_HUMAN | 57 kDa  | 1 | 0 | 0 | 0 |
| Hepatocyte growth factor activator OS=Homo sapiens GN=HGFAC PE=1 SV=1                                       | HGFA_HUMAN  | 71 kDa  | 1 | 0 | 0 | 0 |
| Aryl hydrocarbon receptor OS=Homo sapiens GN=AHR PE=1 SV=2                                                  | AHR_HUMAN   | 96 kDa  | 1 | 0 | 0 | 0 |
| Interleukin-3 receptor subunit alpha OS=Homo sapiens GN=IL3RA PE=1 SV=1                                     | IL3RA_HUMAN | 43 kDa  | 1 | 0 | 0 | 0 |
| HERV-MER_dq12 provirus ancestral Env polypeptide OS=Homo sapiens GN=ERVMER34-1 PE=2 SV=1                    | MER34_HUMAN | 64 kDa  | 1 | 0 | 0 | 0 |
| Ubiquitin conjugation factor E4 A OS=Homo sapiens GN=UBE4A PE=1 SV=2                                        | UBE4A_HUMAN | 123 kDa | 1 | 0 | 0 | 0 |
| Serine palmitoyltransferase 2 OS=Homo sapiens GN=SPTLC2 PE=1 SV=1                                           | SPTC2_HUMAN | 63 kDa  | 1 | 0 | 0 | 0 |
| Disks large homolog 4 OS=Homo sapiens GN=DLG4 PE=1 SV=3                                                     | DLG4_HUMAN  | 80 kDa  | 1 | 0 | 0 | 0 |
| Protein FAM116B OS=Homo sapiens GN=FAM116B PE=2 SV=1                                                        | F116B_HUMAN | 66 kDa  | 1 | 0 | 0 | 0 |
| Myb/SANT-like DNA-binding domain-containing protein 3 OS=Homo sapiens GN=MSANTD3 PE=1 SV=1                  | MSD3_HUMAN  | 32 kDa  | 1 | 0 | 0 | 0 |
| Polyadenylate-binding protein 5 OS=Homo sapiens GN=PABPC5 PE=1 SV=1                                         | PABP5_HUMAN | 43 kDa  | 1 | 0 | 0 | 0 |
| Inactive ubiquitin carboxyl-terminal hydrolase 17-like protein 7 OS=Homo sapiens GN=USP17L7 PE=3 SV=1       | U17L7_HUMAN | 60 kDa  | 1 | 0 | 0 | 0 |
| Cyclin-dependent kinase 4 OS=Homo sapiens GN=CDK4 PE=1 SV=2                                                 | CDK4_HUMAN  | 34 kDa  | 1 | 0 | 0 | 0 |
| Tyrosine-protein kinase Mer OS=Homo sapiens GN=MERTK PE=1 SV=2                                              | MERTK_HUMAN | 110 kDa | 1 | 0 | 0 | 0 |
| Transcription factor AP-4 OS=Homo sapiens GN=TFAP4 PE=1 SV=2                                                | TFAP4_HUMAN | 39 kDa  | 1 | 0 | 0 | 0 |

|                                                                                                         |             |         |   |   |   |   |
|---------------------------------------------------------------------------------------------------------|-------------|---------|---|---|---|---|
| Protein DBF4 homolog B OS=Homo sapiens GN=DBF4B PE=1 SV=1                                               | DBF4B_HUMAN | 67 kDa  | 1 | 0 | 0 | 0 |
| Parathyroid hormone OS=Homo sapiens GN=PTH PE=1 SV=1                                                    | PTHY_HUMAN  | 13 kDa  | 1 | 0 | 0 | 0 |
| Putative uncharacterized protein FLJ45825 OS=Homo sapiens PE=5 SV=1                                     | YF013_HUMAN | 17 kDa  | 1 | 0 | 0 | 0 |
| Acetyl-CoA acetyltransferase, mitochondrial OS=Homo sapiens GN=ACAT1 PE=1 SV=1                          | THIL_HUMAN  | 45 kDa  | 1 | 0 | 0 | 0 |
| Gem-associated protein 5 OS=Homo sapiens GN=GEMIN5 PE=1 SV=3                                            | GEM15_HUMAN | 169 kDa | 1 | 0 | 0 | 0 |
| Uncharacterized aarF domain-containing protein kinase 4 OS=Homo sapiens GN=ADCK4 PE=1 SV=2              | ADCK4_HUMAN | 60 kDa  | 1 | 0 | 0 | 0 |
| PIH1 domain-containing protein 2 OS=Homo sapiens GN=PIH1D2 PE=2 SV=1                                    | PIHD2_HUMAN | 36 kDa  | 1 | 0 | 0 | 0 |
| Zinc finger protein 707 OS=Homo sapiens GN=ZNF707 PE=2 SV=2                                             | ZN707_HUMAN | 43 kDa  | 1 | 0 | 0 | 0 |
| Phenylalanine--tRNA ligase beta subunit OS=Homo sapiens GN=FARSB PE=1 SV=3                              | SYFB_HUMAN  | 66 kDa  | 1 | 0 | 0 | 0 |
| Fibroblast growth factor 3 OS=Homo sapiens GN=FGF3 PE=1 SV=1                                            | FGF3_HUMAN  | 27 kDa  | 1 | 0 | 0 | 0 |
| Iroquois-class homeodomain protein IRX-4 OS=Homo sapiens GN=IRX4 PE=2 SV=2                              | IRX4_HUMAN  | 54 kDa  | 1 | 0 | 0 | 0 |
| Signal recognition particle 68 kDa protein OS=Homo sapiens GN=SRP68 PE=1 SV=2                           | SRP68_HUMAN | 71 kDa  | 1 | 0 | 0 | 0 |
| Kelch-like protein 18 OS=Homo sapiens GN=KLHL18 PE=2 SV=3                                               | KLH18_HUMAN | 64 kDa  | 1 | 0 | 0 | 0 |
| Transcription regulator protein BACH2 OS=Homo sapiens GN=BACH2 PE=1 SV=1                                | BACH2_HUMAN | 93 kDa  | 1 | 0 | 0 | 0 |
| Tissue alpha-L-fucosidase OS=Homo sapiens GN=FUCA1 PE=1 SV=4                                            | FUCO_HUMAN  | 54 kDa  | 1 | 0 | 0 | 0 |
| Protein FAM19A3 OS=Homo sapiens GN=FAM19A3 PE=2 SV=1                                                    | F19A3_HUMAN | 15 kDa  | 1 | 0 | 0 | 0 |
| Putative uncharacterized protein C11orf40 OS=Homo sapiens GN=C11orf40 PE=2 SV=1                         | CK040_HUMAN | 25 kDa  | 1 | 0 | 0 | 0 |
| Pyroline-5-carboxylate reductase 1, mitochondrial OS=Homo sapiens GN=PYCR1 PE=1 SV=2                    | P5CR1_HUMAN | 33 kDa  | 1 | 0 | 0 | 0 |
| CXADR-like membrane protein OS=Homo sapiens GN=CLMP PE=1 SV=1                                           | CLMP_HUMAN  | 41 kDa  | 1 | 0 | 0 | 0 |
| Protein EFR3 homolog A OS=Homo sapiens GN=EFR3A PE=1 SV=2                                               | EFR3A_HUMAN | 93 kDa  | 1 | 0 | 0 | 0 |
| Death-associated protein kinase 3 OS=Homo sapiens GN=DAPK3 PE=1 SV=1                                    | DAPK3_HUMAN | 53 kDa  | 1 | 0 | 0 | 0 |
| Leucine-rich glioma-inactivated protein 1 OS=Homo sapiens GN=LGI1 PE=1 SV=1                             | LGI1_HUMAN  | 64 kDa  | 1 | 0 | 0 | 0 |
| Amyotrophic lateral sclerosis 2 chromosomal region candidate gene 12 protein OS=Homo sapiens GN=ALS2    | ALS2B_HUMAN | 52 kDa  | 1 | 0 | 0 | 0 |
| Splicing factor 1 OS=Homo sapiens GN=SF1 PE=1 SV=4                                                      | SF01_HUMAN  | 68 kDa  | 1 | 0 | 0 | 0 |
| Testis-expressed sequence 30 protein OS=Homo sapiens GN=TEX30 PE=2 SV=1                                 | TEX30_HUMAN | 26 kDa  | 1 | 0 | 0 | 0 |
| Zinc finger protein 286A OS=Homo sapiens GN=ZNF286A PE=2 SV=1                                           | Z286A_HUMAN | 60 kDa  | 1 | 0 | 0 | 0 |
| Uncharacterized protein C3orf19 OS=Homo sapiens GN=C3orf19 PE=2 SV=3                                    | CO19_HUMAN  | 54 kDa  | 1 | 0 | 0 | 0 |
| TATA-binding protein-associated factor 172 OS=Homo sapiens GN=BTAF1 PE=1 SV=2                           | BTAF1_HUMAN | 207 kDa | 1 | 0 | 0 | 0 |
| Sphingolipid delta(4)-desaturase DES1 OS=Homo sapiens GN=DEGS1 PE=1 SV=1                                | DEGS1_HUMAN | 38 kDa  | 1 | 0 | 0 | 0 |
| N-acetyltransferase 6 OS=Homo sapiens GN=NAT6 PE=2 SV=2                                                 | NAT6_HUMAN  | 31 kDa  | 1 | 0 | 0 | 0 |
| Interleukin-17 receptor E OS=Homo sapiens GN=IL17RE PE=1 SV=1                                           | I17RE_HUMAN | 75 kDa  | 1 | 0 | 0 | 0 |
| Zinc finger protein 114 OS=Homo sapiens GN=ZNF114 PE=2 SV=1                                             | ZN114_HUMAN | 48 kDa  | 1 | 0 | 0 | 0 |
| F-box only protein 48 OS=Homo sapiens GN=FBXO48 PE=2 SV=1                                               | FBX48_HUMAN | 18 kDa  | 1 | 0 | 0 | 0 |
| CREB/ATF bZIP transcription factor OS=Homo sapiens GN=CREBZF PE=1 SV=2                                  | ZHANG_HUMAN | 37 kDa  | 1 | 0 | 0 | 0 |
| Serine/arginine repetitive matrix protein 4 OS=Homo sapiens GN=SRRM4 PE=1 SV=2                          | SRRM4_HUMAN | 69 kDa  | 1 | 0 | 0 | 0 |
| Cyclin-T2 OS=Homo sapiens GN=CCNT2 PE=1 SV=2                                                            | CCNT2_HUMAN | 81 kDa  | 1 | 0 | 0 | 0 |
| Patatin-like phospholipase domain-containing protein 7 OS=Homo sapiens GN=PNPLA7 PE=2 SV=3              | PLP17_HUMAN | 146 kDa | 1 | 0 | 0 | 0 |
| Active breakpoint cluster region-related protein OS=Homo sapiens GN=ABR PE=2 SV=2                       | ABR_HUMAN   | 98 kDa  | 1 | 0 | 0 | 0 |
| Potassium voltage-gated channel subfamily B member 2 OS=Homo sapiens GN=KCNB2 PE=2 SV=2                 | KCNB2_HUMAN | 103 kDa | 1 | 0 | 0 | 0 |
| Thrombospondin type-1 domain-containing protein 4 OS=Homo sapiens GN=THSD4 PE=2 SV=2                    | THSD4_HUMAN | 112 kDa | 1 | 0 | 0 | 0 |
| Septin-11 OS=Homo sapiens GN=SEPT11 PE=1 SV=3                                                           | SEP11_HUMAN | 49 kDa  | 1 | 0 | 0 | 0 |
| von Willebrand factor C and EGF domain-containing protein OS=Homo sapiens GN=VWCE PE=2 SV=2             | VWCE_HUMAN  | 100 kDa | 1 | 0 | 0 | 0 |
| Rab-like protein 2A OS=Homo sapiens GN=RABL2A PE=2 SV=1                                                 | RBL2A_HUMAN | 26 kDa  | 1 | 0 | 0 | 0 |
| 39S ribosomal protein L1, mitochondrial OS=Homo sapiens GN=MRPL1 PE=1 SV=2                              | RM01_HUMAN  | 37 kDa  | 1 | 0 | 0 | 0 |
| BTB/POZ domain-containing protein 2 OS=Homo sapiens GN=BTBD2 PE=1 SV=1                                  | BTBD2_HUMAN | 56 kDa  | 1 | 0 | 0 | 0 |
| Putative uncharacterized protein FRMD6-AS1 OS=Homo sapiens GN=FRMD6-AS1 PE=5 SV=1                       | FMA51_HUMAN | 39 kDa  | 1 | 0 | 0 | 0 |
| Zinc finger protein 609 OS=Homo sapiens GN=ZNF609 PE=1 SV=2                                             | ZN609_HUMAN | 151 kDa | 1 | 0 | 0 | 0 |
| Leucine-rich repeat-containing protein 19 OS=Homo sapiens GN=LRRC19 PE=2 SV=1                           | LRC19_HUMAN | 42 kDa  | 1 | 0 | 0 | 0 |
| Endogenous Bornavirus-like nucleoprotein 1 OS=Homo sapiens GN=EBLN1 PE=3 SV=1                           | EBLN1_HUMAN | 40 kDa  | 1 | 0 | 0 | 0 |
| Ras-related protein R-Ras2 OS=Homo sapiens GN=RRAS2 PE=1 SV=1                                           | RRAS2_HUMAN | 23 kDa  | 1 | 0 | 0 | 0 |
| Sorting nexin-4 OS=Homo sapiens GN=SNX4 PE=1 SV=1                                                       | SNX4_HUMAN  | 52 kDa  | 1 | 0 | 0 | 0 |
| Rho guanine nucleotide exchange factor 25 OS=Homo sapiens GN=ARHGEF25 PE=1 SV=2                         | ARHGP_HUMAN | 64 kDa  | 1 | 0 | 0 | 0 |
| Uncharacterized protein C1orf64 OS=Homo sapiens GN=C1orf64 PE=2 SV=1                                    | CA064_HUMAN | 18 kDa  | 1 | 0 | 0 | 0 |
| Probable G-protein coupled receptor 110 OS=Homo sapiens GN=GPR110 PE=2 SV=2                             | GP110_HUMAN | 101 kDa | 1 | 0 | 0 | 0 |
| Monocarboxylate transporter 7 OS=Homo sapiens GN=SLC16A6 PE=1 SV=2                                      | MOT7_HUMAN  | 57 kDa  | 1 | 0 | 0 | 0 |
| Coagulation factor XII OS=Homo sapiens GN=F12 PE=1 SV=3                                                 | FA12_HUMAN  | 68 kDa  | 1 | 0 | 0 | 0 |
| Protein kinase C eta type OS=Homo sapiens GN=PRKCH PE=1 SV=4                                            | KPCL_HUMAN  | 78 kDa  | 1 | 0 | 0 | 0 |
| Zinc finger protein 891 OS=Homo sapiens GN=ZNF891 PE=2 SV=2                                             | ZN891_HUMAN | 64 kDa  | 1 | 0 | 0 | 0 |
| BTB/POZ domain-containing protein KCTD8 OS=Homo sapiens GN=KCTD8 PE=2 SV=1                              | KCTD8_HUMAN | 52 kDa  | 1 | 0 | 0 | 0 |
| U4/U6.U5 tri-snRNP-associated protein 1 OS=Homo sapiens GN=SART1 PE=1 SV=1                              | SNUT1_HUMAN | 90 kDa  | 1 | 0 | 0 | 0 |
| Putative cleavage and polyadenylation specificity factor subunit 4-like protein OS=Homo sapiens GN=CPSF | CPS4L_HUMAN | 21 kDa  | 1 | 0 | 0 | 0 |
| Fascin-3 OS=Homo sapiens GN=FSCN3 PE=1 SV=1                                                             | FSCN3_HUMAN | 57 kDa  | 1 | 0 | 0 | 0 |
| ATP-dependent RNA helicase DDX18 OS=Homo sapiens GN=DDX18 PE=1 SV=2                                     | DDX18_HUMAN | 75 kDa  | 1 | 0 | 0 | 0 |
| Dipeptidyl peptidase 3 OS=Homo sapiens GN=DPP3 PE=1 SV=2                                                | DPP3_HUMAN  | 83 kDa  | 1 | 0 | 0 | 0 |
| Lipoma HMGIC fusion partner-like 4 protein OS=Homo sapiens GN=LHFPL4 PE=2 SV=1                          | LHPL4_HUMAN | 27 kDa  | 1 | 0 | 0 | 0 |
| Endothelial lipase OS=Homo sapiens GN=LIPG PE=1 SV=1                                                    | LIPE_HUMAN  | 57 kDa  | 1 | 0 | 0 | 0 |
| HLA class I histocompatibility antigen, Cw-4 alpha chain OS=Homo sapiens GN=HLA-C PE=1 SV=1             | 1C04_HUMAN  | 41 kDa  | 1 | 0 | 0 | 0 |
| Neuronal acetylcholine receptor subunit alpha-2 OS=Homo sapiens GN=CHRNA2 PE=1 SV=2                     | ACHA2_HUMAN | 60 kDa  | 1 | 0 | 0 | 0 |
| Coiled-coil domain-containing protein 144B OS=Homo sapiens GN=CCDC144B PE=2 SV=1                        | C144B_HUMAN | 83 kDa  | 1 | 0 | 0 | 0 |
| Uncharacterized protein C2orf81 OS=Homo sapiens GN=C2orf81 PE=2 SV=2                                    | CB081_HUMAN | 63 kDa  | 1 | 0 | 0 | 0 |
| C-C chemokine receptor type 10 OS=Homo sapiens GN=CCR10 PE=1 SV=3                                       | CCR10_HUMAN | 38 kDa  | 1 | 0 | 0 | 0 |
| Choriogonadotropin subunit beta variant 2 OS=Homo sapiens GN=CGB2 PE=2 SV=4                             | CGB2_HUMAN  | 21 kDa  | 1 | 0 | 0 | 0 |
| C-type lectin domain family 2 member A OS=Homo sapiens GN=CLEC2A PE=1 SV=2                              | CLC2A_HUMAN | 20 kDa  | 1 | 0 | 0 | 0 |
| Cancer/testis antigen 62 OS=Homo sapiens GN=CT62 PE=2 SV=1                                              | CT62_HUMAN  | 15 kDa  | 1 | 0 | 0 | 0 |
| DAN domain family member 5 OS=Homo sapiens GN=DAND5 PE=2 SV=1                                           | DAND5_HUMAN | 20 kDa  | 1 | 0 | 0 | 0 |
| Eyes absent homolog 4 OS=Homo sapiens GN=EYA4 PE=1 SV=2                                                 | EYA4_HUMAN  | 70 kDa  | 1 | 0 | 0 | 0 |
| Protein FAM133A OS=Homo sapiens GN=FAM133A PE=2 SV=1                                                    | F133A_HUMAN | 29 kDa  | 1 | 0 | 0 | 0 |
| Protein FAM178B OS=Homo sapiens GN=FAM178B PE=2 SV=2                                                    | F178B_HUMAN | 94 kDa  | 1 | 0 | 0 | 0 |
| Protein FAM24A OS=Homo sapiens GN=FAM24A PE=2 SV=1                                                      | FA24A_HUMAN | 11 kDa  | 1 | 0 | 0 | 0 |
| Protein FAM3B OS=Homo sapiens GN=FAM3B PE=1 SV=2                                                        | FAM3B_HUMAN | 26 kDa  | 1 | 0 | 0 | 0 |
| Gem-associated protein 7 OS=Homo sapiens GN=GEMIN7 PE=1 SV=1                                            | GEMI7_HUMAN | 15 kDa  | 1 | 0 | 0 | 0 |
| Gamma-glutamyltransferase light chain 1 OS=Homo sapiens GN=GGTLC1 PE=2 SV=2                             | GGTL1_HUMAN | 24 kDa  | 1 | 0 | 0 | 0 |

|                                                                                                             |             |         |   |   |   |   |
|-------------------------------------------------------------------------------------------------------------|-------------|---------|---|---|---|---|
| Glucagon-like peptide 1 receptor OS=Homo sapiens GN=GLP1R PE=1 SV=2                                         | GLP1R_HUMAN | 53 kDa  | 1 | 0 | 0 | 0 |
| Guanine nucleotide-binding protein G(olf) subunit alpha OS=Homo sapiens GN=GNAL PE=1 SV=1                   | GNAL_HUMAN  | 44 kDa  | 1 | 0 | 0 | 0 |
| Protein KIAA0664 OS=Homo sapiens GN=KIAA0664 PE=1 SV=2                                                      | K0664_HUMAN | 147 kDa | 1 | 0 | 0 | 0 |
| Leukotriene C4 synthase OS=Homo sapiens GN=LTC4S PE=1 SV=1                                                  | LTC4S_HUMAN | 17 kDa  | 1 | 0 | 0 | 0 |
| Melanoma-associated antigen C1 OS=Homo sapiens GN=MAGEC1 PE=1 SV=3                                          | MAGC1_HUMAN | 124 kDa | 1 | 0 | 0 | 0 |
| Male-specific lethal 1 homolog OS=Homo sapiens GN=MSL1 PE=1 SV=3                                            | MSL1_HUMAN  | 67 kDa  | 1 | 0 | 0 | 0 |
| Nucleoside diphosphate kinase 7 OS=Homo sapiens GN=NME7 PE=1 SV=1                                           | NDK7_HUMAN  | 42 kDa  | 1 | 0 | 0 | 0 |
| Olfactory receptor 52J3 OS=Homo sapiens GN=OR52J3 PE=2 SV=2                                                 | O52J3_HUMAN | 35 kDa  | 1 | 0 | 0 | 0 |
| Olfactory receptor 8D4 OS=Homo sapiens GN=OR8D4 PE=2 SV=1                                                   | OR8D4_HUMAN | 35 kDa  | 1 | 0 | 0 | 0 |
| Osteocalcin OS=Homo sapiens GN=BGLAP PE=1 SV=2                                                              | OSTCN_HUMAN | 11 kDa  | 1 | 0 | 0 | 0 |
| PAP-associated domain-containing protein 5 OS=Homo sapiens GN=PAPD5 PE=1 SV=2                               | PAPD5_HUMAN | 63 kDa  | 1 | 0 | 0 | 0 |
| Phosphatidylethanolamine-binding protein 4 OS=Homo sapiens GN=PEBP4 PE=1 SV=3                               | PEBP4_HUMAN | 26 kDa  | 1 | 0 | 0 | 0 |
| 1-phosphatidylinositol 4,5-bisphosphate phosphodiesterase delta-1 OS=Homo sapiens GN=PLCD1 PE=1 SV=1        | PLCD1_HUMAN | 86 kDa  | 1 | 0 | 0 | 0 |
| N-acetylaspartyl-glutamate synthetase A OS=Homo sapiens GN=RIMKLA PE=2 SV=2                                 | RIMKA_HUMAN | 43 kDa  | 1 | 0 | 0 | 0 |
| Ribonuclease inhibitor OS=Homo sapiens GN=RNH1 PE=1 SV=2                                                    | RINI_HUMAN  | 50 kDa  | 1 | 0 | 0 | 0 |
| 60S ribosomal protein L18 OS=Homo sapiens GN=RPL18 PE=1 SV=2                                                | RL18_HUMAN  | 22 kDa  | 1 | 0 | 0 | 0 |
| Equilibrative nucleoside transporter 3 OS=Homo sapiens GN=SLC29A3 PE=1 SV=3                                 | S29A3_HUMAN | 52 kDa  | 1 | 0 | 0 | 0 |
| Solute carrier organic anion transporter family member 1C1 OS=Homo sapiens GN=SLCO1C1 PE=2 SV=1             | SO1C1_HUMAN | 79 kDa  | 1 | 0 | 0 | 0 |
| Sine oculis-binding protein homolog OS=Homo sapiens GN=SOBP PE=2 SV=2                                       | SOBP_HUMAN  | 93 kDa  | 1 | 0 | 0 | 0 |
| Stomatin-like protein 3 OS=Homo sapiens GN=STOML3 PE=1 SV=1                                                 | STML3_HUMAN | 32 kDa  | 1 | 0 | 0 | 0 |
| Dimethyladenosine transferase 1, mitochondrial OS=Homo sapiens GN=TFB1M PE=1 SV=1                           | TFB1M_HUMAN | 40 kDa  | 1 | 0 | 0 | 0 |
| Tripartite motif-containing protein 75 OS=Homo sapiens GN=TRIM75 PE=2 SV=2                                  | TRI75_HUMAN | 54 kDa  | 1 | 0 | 0 | 0 |
| Tetrapeptide repeat protein 33 OS=Homo sapiens GN=TTTC33 PE=1 SV=2                                          | TTC33_HUMAN | 29 kDa  | 1 | 0 | 0 | 0 |
| Ubiquitin carboxyl-terminal hydrolase 12 OS=Homo sapiens GN=USP12 PE=1 SV=2                                 | UBP12_HUMAN | 43 kDa  | 1 | 0 | 0 | 0 |
| Voltage-dependent anion-selective channel protein 1 OS=Homo sapiens GN=VDAC1 PE=1 SV=2                      | VDAC1_HUMAN | 31 kDa  | 1 | 0 | 0 | 0 |
| Williams-Beuren syndrome chromosomal region 16 protein OS=Homo sapiens GN=WBSCR16 PE=1 SV=2                 | WBS16_HUMAN | 50 kDa  | 1 | 0 | 0 | 0 |
| Putative uncharacterized protein FLJ35645 OS=Homo sapiens GN=FLJ35645 PE=1 SV=1                             | YC005_HUMAN | 25 kDa  | 1 | 0 | 0 | 0 |
| Putative uncharacterized protein ENSP00000380701 OS=Homo sapiens GN=ENSP00000380701 PE=4 SV=1               | YQ045_HUMAN | 8 kDa   | 1 | 0 | 0 | 0 |
| Ribonuclease ZC3H12A OS=Homo sapiens GN=ZC3H12A PE=1 SV=1                                                   | ZC12A_HUMAN | 66 kDa  | 1 | 0 | 0 | 0 |
| Putative zinc finger protein 730 OS=Homo sapiens GN=ZNF730 PE=2 SV=1                                        | ZN730_HUMAN | 59 kDa  | 1 | 0 | 0 | 0 |
| Zinc finger protein 883 OS=Homo sapiens GN=ZNF883 PE=2 SV=1                                                 | ZN883_HUMAN | 44 kDa  | 1 | 0 | 0 | 0 |
| Transmembrane emp24 domain-containing protein 2 OS=Homo sapiens GN=TMED2 PE=1 SV=1                          | TMED2_HUMAN | 23 kDa  | 1 | 0 | 0 | 0 |
| Lymphocyte transmembrane adapter 1 OS=Homo sapiens GN=LAX1 PE=1 SV=1                                        | LAX1_HUMAN  | 44 kDa  | 1 | 0 | 0 | 0 |
| Secretoglobulin family 1C member 1 OS=Homo sapiens GN=SCGB1C1 PE=2 SV=2                                     | SG1C1_HUMAN | 10 kDa  | 1 | 0 | 0 | 0 |
| Cell division control protein 6 homolog OS=Homo sapiens GN=CDC6 PE=1 SV=1                                   | CDC6_HUMAN  | 63 kDa  | 1 | 0 | 0 | 0 |
| Elastin OS=Homo sapiens GN=ELN PE=1 SV=3                                                                    | ELN_HUMAN   | 68 kDa  | 1 | 0 | 0 | 0 |
| Cohesin subunit SA-1 OS=Homo sapiens GN=STAG1 PE=1 SV=3                                                     | STAG1_HUMAN | 144 kDa | 1 | 0 | 0 | 0 |
| Orphan sodium- and chloride-dependent neurotransmitter transporter NTT5 OS=Homo sapiens GN=SLC6A6 PE=1 SV=1 | S6A16_HUMAN | 82 kDa  | 1 | 0 | 0 | 0 |
| Probable G-protein coupled receptor 113 OS=Homo sapiens GN=GPR113 PE=2 SV=1                                 | GP113_HUMAN | 116 kDa | 1 | 0 | 0 | 0 |
| Cyclin-F OS=Homo sapiens GN=CCNF PE=1 SV=2                                                                  | CCNF_HUMAN  | 88 kDa  | 1 | 0 | 0 | 0 |
| Transmembrane prostate androgen-induced protein OS=Homo sapiens GN=PMEPA1 PE=1 SV=1                         | PMEPA_HUMAN | 32 kDa  | 1 | 0 | 0 | 0 |
| Protein maelstrom homolog OS=Homo sapiens GN=MAEL PE=1 SV=1                                                 | MAEL_HUMAN  | 49 kDa  | 1 | 0 | 0 | 0 |
| Inorganic pyrophosphatase OS=Homo sapiens GN=PPA1 PE=1 SV=2                                                 | IPYR_HUMAN  | 33 kDa  | 1 | 0 | 0 | 0 |
| Coiled-coil domain-containing protein 74B OS=Homo sapiens GN=CCDC74B PE=2 SV=1                              | CC74B_HUMAN | 42 kDa  | 1 | 0 | 0 | 0 |
| Putative uncharacterized protein encoded by LINC00479 OS=Homo sapiens GN=LINC00479 PE=5 SV=2                | CU129_HUMAN | 15 kDa  | 1 | 0 | 0 | 0 |
| Zinc finger protein 248 OS=Homo sapiens GN=ZNF248 PE=1 SV=1                                                 | ZN248_HUMAN | 67 kDa  | 1 | 0 | 0 | 0 |
| Olfactory receptor 2T33 OS=Homo sapiens GN=OR2T33 PE=2 SV=1                                                 | O2T33_HUMAN | 36 kDa  | 1 | 0 | 0 | 0 |
| Beta-defensin 123 OS=Homo sapiens GN=DEFB123 PE=2 SV=1                                                      | DB123_HUMAN | 8 kDa   | 1 | 0 | 0 | 0 |
| C-terminal-binding protein 2 OS=Homo sapiens GN=CTBP2 PE=1 SV=1                                             | CTBP2_HUMAN | 49 kDa  | 1 | 0 | 0 | 0 |
| Rab-interacting lysosomal protein OS=Homo sapiens GN=RILP PE=1 SV=1                                         | RILP_HUMAN  | 44 kDa  | 1 | 0 | 0 | 0 |
| Peptidyl-prolyl cis-trans isomerase NIMA-interacting 4 OS=Homo sapiens GN=PIN4 PE=1 SV=1                    | PIN4_HUMAN  | 14 kDa  | 1 | 0 | 0 | 0 |
| Sulfotransferase 4A1 OS=Homo sapiens GN=SULT4A1 PE=1 SV=2                                                   | ST4A1_HUMAN | 33 kDa  | 1 | 0 | 0 | 0 |
| Transmembrane protein 110 OS=Homo sapiens GN=TMEM110 PE=2 SV=1                                              | TM110_HUMAN | 33 kDa  | 1 | 0 | 0 | 0 |
| Uncharacterized protein C11orf71 OS=Homo sapiens GN=C11orf71 PE=2 SV=2                                      | CK071_HUMAN | 13 kDa  | 1 | 0 | 0 | 0 |
| Gamma-crystallin A OS=Homo sapiens GN=CRYGA PE=2 SV=3                                                       | CRGA_HUMAN  | 21 kDa  | 1 | 0 | 0 | 0 |
| Late cornified envelope protein 3A OS=Homo sapiens GN=LCE3A PE=2 SV=1                                       | LCE3A_HUMAN | 9 kDa   | 1 | 0 | 0 | 0 |
| Transmembrane protein 18 OS=Homo sapiens GN=TMEM18 PE=1 SV=2                                                | TMM18_HUMAN | 16 kDa  | 1 | 0 | 0 | 0 |
| Ileal sodium/bile acid cotransporter OS=Homo sapiens GN=SLC10A2 PE=1 SV=2                                   | NTCP2_HUMAN | 38 kDa  | 1 | 0 | 0 | 0 |
| Taste receptor type 2 member 39 OS=Homo sapiens GN=TAS2R39 PE=2 SV=3                                        | T2R39_HUMAN | 39 kDa  | 1 | 0 | 0 | 0 |
| Protein ITFG3 OS=Homo sapiens GN=ITFG3 PE=1 SV=1                                                            | ITFG3_HUMAN | 60 kDa  | 1 | 0 | 0 | 0 |
| 25-hydroxyvitamin D-1 alpha hydroxylase, mitochondrial OS=Homo sapiens GN=CYP27B1 PE=1 SV=1                 | CP27B_HUMAN | 57 kDa  | 1 | 0 | 0 | 0 |
| Azurocidin OS=Homo sapiens GN=AZU1 PE=1 SV=3                                                                | CAP7_HUMAN  | 27 kDa  | 1 | 0 | 0 | 0 |
| Phosducin-like protein 2 OS=Homo sapiens GN=PDCL2 PE=1 SV=2                                                 | PDCL2_HUMAN | 28 kDa  | 1 | 0 | 0 | 0 |
| Cystine/glutamate transporter OS=Homo sapiens GN=SLC7A11 PE=1 SV=1                                          | XCT_HUMAN   | 55 kDa  | 1 | 0 | 0 | 0 |
| ERI1 exoribonuclease 3 OS=Homo sapiens GN=ERI3 PE=1 SV=2                                                    | ERI3_HUMAN  | 37 kDa  | 1 | 0 | 0 | 0 |
| Polyribonucleotide 5'-hydroxyl-kinase Clp1 OS=Homo sapiens GN=CLP1 PE=1 SV=1                                | CLP1_HUMAN  | 48 kDa  | 1 | 0 | 0 | 0 |
| Uromodulin OS=Homo sapiens GN=UMOD PE=1 SV=1                                                                | UROM_HUMAN  | 70 kDa  | 1 | 0 | 0 | 0 |
| Rho GTPase-activating protein 11B OS=Homo sapiens GN=ARHGAP11B PE=1 SV=1                                    | RHGBB_HUMAN | 30 kDa  | 1 | 0 | 0 | 0 |
| Serine/threonine-protein kinase WNK4 OS=Homo sapiens GN=WNK4 PE=1 SV=1                                      | WNK4_HUMAN  | 135 kDa | 1 | 0 | 0 | 0 |
| Olfactory receptor 2T34 OS=Homo sapiens GN=OR2T34 PE=2 SV=1                                                 | O2T34_HUMAN | 36 kDa  | 1 | 0 | 0 | 0 |
| Melanophilin OS=Homo sapiens GN=MLPH PE=1 SV=1                                                              | MELPH_HUMAN | 66 kDa  | 1 | 0 | 0 | 0 |
| Leucine-rich repeat-containing protein 3B OS=Homo sapiens GN=LRRC3B PE=2 SV=1                               | LRC3B_HUMAN | 29 kDa  | 1 | 0 | 0 | 0 |
| Zinc finger matrin-type protein 2 OS=Homo sapiens GN=ZMAT2 PE=1 SV=1                                        | ZMAT2_HUMAN | 24 kDa  | 1 | 0 | 0 | 0 |
| 60S ribosomal protein L27 OS=Homo sapiens GN=RPL27 PE=1 SV=2                                                | RL27_HUMAN  | 16 kDa  | 1 | 0 | 0 | 0 |
| Protein FAM22B OS=Homo sapiens GN=FAM22B PE=2 SV=2                                                          | FA22B_HUMAN | 94 kDa  | 1 | 0 | 0 | 0 |
| Malectin OS=Homo sapiens GN=MLEC PE=1 SV=1                                                                  | MLEC_HUMAN  | 32 kDa  | 1 | 0 | 0 | 0 |
| WW domain-binding protein 1 OS=Homo sapiens GN=WBP1 PE=1 SV=1                                               | WBP1_HUMAN  | 29 kDa  | 1 | 0 | 0 | 0 |
| Cyclin-dependent kinase 5 OS=Homo sapiens GN=CDK5 PE=1 SV=3                                                 | CDK5_HUMAN  | 33 kDa  | 1 | 0 | 0 | 0 |
| DPY30 domain-containing protein 1 OS=Homo sapiens GN=DYDC1 PE=1 SV=1                                        | DYDC1_HUMAN | 21 kDa  | 1 | 0 | 0 | 0 |
| Conserved oligomeric Golgi complex subunit 1 OS=Homo sapiens GN=COG1 PE=1 SV=1                              | COG1_HUMAN  | 109 kDa | 1 | 0 | 0 | 0 |
| Integrin beta-2 OS=Homo sapiens GN=ITGB2 PE=1 SV=2                                                          | ITB2_HUMAN  | 85 kDa  | 1 | 0 | 0 | 0 |
| GDNF family receptor alpha-3 OS=Homo sapiens GN=GFRA3 PE=1 SV=2                                             | GFRA3_HUMAN | 45 kDa  | 1 | 0 | 0 | 0 |

|                                                                                                       |                |         |   |   |   |   |
|-------------------------------------------------------------------------------------------------------|----------------|---------|---|---|---|---|
| Gap junction alpha-1 protein OS=Homo sapiens GN=GJA1 PE=1 SV=2                                        | CXA1_HUMAN     | 43 kDa  | 1 | 0 | 0 | 0 |
| Keratin-associated protein 3-3 OS=Homo sapiens GN=KRTAP3-3 PE=1 SV=1                                  | KRA33_HUMAN    | 10 kDa  | 1 | 0 | 0 | 0 |
| Zinc finger protein 362 OS=Homo sapiens GN=ZNF362 PE=2 SV=1                                           | ZN362_HUMAN    | 46 kDa  | 1 | 0 | 0 | 0 |
| Tyrosine-protein kinase Fyn OS=Homo sapiens GN=FYN PE=1 SV=3                                          | FYN_HUMAN      | 61 kDa  | 1 | 0 | 0 | 0 |
| Dual specificity protein phosphatase 7 OS=Homo sapiens GN=DUSP7 PE=1 SV=4                             | DUS7_HUMAN     | 45 kDa  | 1 | 0 | 0 | 0 |
| Peroxisomal protein 2 OS=Homo sapiens GN=PRDX2 PE=1 SV=5                                              | PRDX2_HUMAN    | 22 kDa  | 1 | 0 | 0 | 0 |
| Multidrug and toxin extrusion protein 1 OS=Homo sapiens GN=SLC47A1 PE=1 SV=1                          | S47A1_HUMAN    | 62 kDa  | 1 | 0 | 0 | 0 |
| AP-1 complex-associated regulatory protein OS=Homo sapiens GN=AP1AR PE=1 SV=1                         | AP1AR_HUMAN    | 34 kDa  | 1 | 0 | 0 | 0 |
| Outer dense fiber protein 3-like protein 1 OS=Homo sapiens GN=ODF3L1 PE=2 SV=1                        | OD3L1_HUMAN    | 31 kDa  | 1 | 0 | 0 | 0 |
| Radixin OS=Homo sapiens GN=RDYX PE=1 SV=1                                                             | RADYX_HUMAN    | 69 kDa  | 1 | 0 | 0 | 0 |
| Uncharacterized protein C10orf105 OS=Homo sapiens GN=C10orf105 PE=2 SV=3                              | CJ105_HUMAN    | 15 kDa  | 1 | 0 | 0 | 0 |
| Neurotrophin OS=Homo sapiens GN=PRSS12 PE=2 SV=2                                                      | NETR1_HUMAN    | 97 kDa  | 1 | 0 | 0 | 0 |
| Dual specificity mitogen-activated protein kinase kinase 5 OS=Homo sapiens GN=MAP2K5 PE=1 SV=2        | MP2K5_HUMAN    | 50 kDa  | 1 | 0 | 0 | 0 |
| Potassium voltage-gated channel subfamily E member 1-like protein OS=Homo sapiens GN=KCNE1L PE=2 SV=1 | KCE1L_HUMAN    | 15 kDa  | 1 | 0 | 0 | 0 |
| Sodium/calcium exchanger 3 OS=Homo sapiens GN=SLC8A3 PE=2 SV=2                                        | NAC3_HUMAN     | 103 kDa | 1 | 0 | 0 | 0 |
| Netrin receptor UNC5A OS=Homo sapiens GN=UNC5A PE=2 SV=3                                              | UNC5A_HUMAN    | 93 kDa  | 1 | 0 | 0 | 0 |
| Pyroglutamylation R-famide peptide receptor OS=Homo sapiens GN=QRFPR PE=1 SV=2                        | QRFPR_HUMAN    | 49 kDa  | 1 | 0 | 0 | 0 |
| LETM1 domain-containing protein 1 OS=Homo sapiens GN=LETMD1 PE=1 SV=1                                 | LETMD1_HUMAN   | 42 kDa  | 1 | 0 | 0 | 0 |
| Lipase maturation factor 1 OS=Homo sapiens GN=LMF1 PE=1 SV=1                                          | LMF1_HUMAN     | 65 kDa  | 1 | 0 | 0 | 0 |
| ADP-ribosylation factor-like protein 15 OS=Homo sapiens GN=ARL15 PE=1 SV=1                            | ARL15_HUMAN    | 23 kDa  | 1 | 0 | 0 | 0 |
| Ubiquitin carboxyl-terminal hydrolase BAP1 OS=Homo sapiens GN=BAP1 PE=1 SV=2                          | BAP1_HUMAN     | 80 kDa  | 1 | 0 | 0 | 0 |
| Leukocyte cell-derived chemotaxin 1 OS=Homo sapiens GN=LECT1 PE=2 SV=1                                | LECT1_HUMAN    | 37 kDa  | 1 | 0 | 0 | 0 |
| Uncharacterized protein CXorf49 OS=Homo sapiens GN=CXorf49 PE=2 SV=2                                  | CXorf49_HUMAN  | 54 kDa  | 1 | 0 | 0 | 0 |
| Keratin, type II cytoskeletal 71 OS=Homo sapiens GN=KRT71 PE=1 SV=3                                   | K2C71_HUMAN    | 57 kDa  | 1 | 0 | 0 | 0 |
| Glutamate dehydrogenase 2, mitochondrial OS=Homo sapiens GN=GLUD2 PE=1 SV=2                           | DHE4_HUMAN     | 61 kDa  | 1 | 0 | 0 | 0 |
| DEP domain-containing protein 4 OS=Homo sapiens GN=DEPDC4 PE=2 SV=1                                   | DEPDC4_HUMAN   | 34 kDa  | 1 | 0 | 0 | 0 |
| E3 ubiquitin-protein ligase MARCH8 OS=Homo sapiens GN=MARCH8 PE=1 SV=1                                | MARH8_HUMAN    | 33 kDa  | 1 | 0 | 0 | 0 |
| Kallikrein-5 OS=Homo sapiens GN=KLK5 PE=1 SV=2                                                        | KLK5_HUMAN     | 32 kDa  | 1 | 0 | 0 | 0 |
| Sodium-coupled neutral amino acid transporter 1 OS=Homo sapiens GN=SLC38A1 PE=1 SV=1                  | S38A1_HUMAN    | 54 kDa  | 1 | 0 | 0 | 0 |
| Glycylpeptide N-tetradecanoyltransferase 1 OS=Homo sapiens GN=NMT1 PE=1 SV=2                          | NMT1_HUMAN     | 57 kDa  | 1 | 0 | 0 | 0 |
| Putative tubulin beta chain-like protein ENSP00000290377 OS=Homo sapiens GN=ENSP00000290377 PE=5 SV=2 | YI016_HUMAN    | 42 kDa  | 1 | 0 | 0 | 0 |
| Uncharacterized protein KIAA0513 OS=Homo sapiens GN=KIAA0513 PE=2 SV=1                                | K0513_HUMAN    | 47 kDa  | 1 | 0 | 0 | 0 |
| Coiled-coil domain-containing protein 12 OS=Homo sapiens GN=CCDC12 PE=1 SV=1                          | CCDC12_HUMAN   | 19 kDa  | 1 | 0 | 0 | 0 |
| Transmembrane channel-like protein 7 OS=Homo sapiens GN=TMCC7 PE=2 SV=1                               | TMCC7_HUMAN    | 84 kDa  | 1 | 0 | 0 | 0 |
| Uncharacterized protein C12orf68 OS=Homo sapiens GN=C12orf68 PE=2 SV=2                                | C12orf68_HUMAN | 20 kDa  | 1 | 0 | 0 | 0 |
| Runt-related transcription factor 2 OS=Homo sapiens GN=RUNX2 PE=1 SV=2                                | RUNX2_HUMAN    | 57 kDa  | 1 | 0 | 0 | 0 |
| ES cell-associated transcript 1 protein OS=Homo sapiens GN=ECAT1 PE=2 SV=1                            | ECAT1_HUMAN    | 24 kDa  | 1 | 0 | 0 | 0 |
| N-terminal EF-hand calcium-binding protein 3 OS=Homo sapiens GN=NECA3 PE=1 SV=2                       | NECA3_HUMAN    | 44 kDa  | 1 | 0 | 0 | 0 |
| DNA-directed RNA polymerase II subunit RPB4 OS=Homo sapiens GN=POLR2D PE=1 SV=1                       | RPB4_HUMAN     | 16 kDa  | 1 | 0 | 0 | 0 |
| HLA class I histocompatibility antigen, Cw-5 alpha chain OS=Homo sapiens GN=HLA-C PE=2 SV=1           | 1C05_HUMAN     | 41 kDa  | 1 | 0 | 0 | 0 |
| SUMO-conjugating enzyme UBC9 OS=Homo sapiens GN=UBE2I PE=1 SV=1                                       | UBE2I_HUMAN    | 18 kDa  | 1 | 0 | 0 | 0 |
| Transketolase OS=Homo sapiens GN=TKT PE=1 SV=3                                                        | TKT_HUMAN      | 68 kDa  | 0 | 9 | 1 | 1 |
| Retinal dehydrogenase 1 OS=Homo sapiens GN=ALDH1A1 PE=1 SV=2                                          | ALDH1A1_HUMAN  | 55 kDa  | 0 | 7 | 4 | 6 |
| Heat shock protein HSP 90-beta OS=Homo sapiens GN=HSP90AB1 PE=1 SV=4                                  | HS90B_HUMAN    | 83 kDa  | 0 | 8 | 1 | 4 |
| Keratin, type II cytoskeletal 2 epidermal OS=Homo sapiens GN=KRT2 PE=1 SV=2                           | K22E_HUMAN     | 65 kDa  | 0 | 1 | 8 | 1 |
| Heat shock protein HSP 90-alpha OS=Homo sapiens GN=HSP90AA1 PE=1 SV=5                                 | HS90A_HUMAN    | 85 kDa  | 0 | 6 | 5 | 0 |
| Actin, alpha cardiac muscle 1 OS=Homo sapiens GN=ACTC1 PE=1 SV=1                                      | ACTC_HUMAN     | 42 kDa  | 0 | 2 | 0 | 2 |
| Plexin-A1 OS=Homo sapiens GN=PLXNA1 PE=1 SV=3                                                         | PLXNA1_HUMAN   | 211 kDa | 0 | 0 | 0 | 1 |
| Endoplasmic reticulum protein OS=Homo sapiens GN=HSP90B1 PE=1 SV=1                                    | ENPL_HUMAN     | 92 kDa  | 0 | 5 | 2 | 2 |
| Elongation factor 2 OS=Homo sapiens GN=EEF2 PE=1 SV=4                                                 | EF2_HUMAN      | 95 kDa  | 0 | 6 | 2 | 2 |
| Calreticulin OS=Homo sapiens GN=CALR PE=1 SV=1                                                        | CALR_HUMAN     | 48 kDa  | 0 | 5 | 1 | 3 |
| Xin actin-binding repeat-containing protein 2 OS=Homo sapiens GN=XIRP2 PE=1 SV=2                      | XIRP2_HUMAN    | 382 kDa | 0 | 1 | 0 | 0 |
| Extracellular matrix protein FRAS1 OS=Homo sapiens GN=FRAS1 PE=2 SV=1                                 | FRAS1_HUMAN    | 443 kDa | 0 | 0 | 1 | 0 |
| E3 ubiquitin-protein ligase UBR4 OS=Homo sapiens GN=UBR4 PE=1 SV=1                                    | UBR4_HUMAN     | 574 kDa | 0 | 0 | 1 | 1 |
| Cytoplasmic dynein 2 heavy chain 1 OS=Homo sapiens GN=DYNC2H1 PE=1 SV=4                               | DYHC2_HUMAN    | 493 kDa | 0 | 1 | 0 | 0 |
| Heat shock 70 kDa protein 1A/1B OS=Homo sapiens GN=HSPA1A PE=1 SV=5                                   | HSP70_HUMAN    | 70 kDa  | 0 | 2 | 3 | 1 |
| Protein polyubiquitin OS=Homo sapiens GN=PUB1 PE=1 SV=1                                               | PUB1_HUMAN     | 193 kDa | 0 | 1 | 0 | 0 |
| Collagen alpha-1(XVI) chain OS=Homo sapiens GN=COL16A1 PE=1 SV=2                                      | COGA1_HUMAN    | 158 kDa | 0 | 0 | 0 | 1 |
| Coiled-coil domain-containing protein 168 OS=Homo sapiens GN=CCDC168 PE=2 SV=2                        | CC168_HUMAN    | 278 kDa | 0 | 0 | 1 | 0 |
| Protein dopey-2 OS=Homo sapiens GN=DOPEY2 PE=1 SV=5                                                   | DOP2_HUMAN     | 258 kDa | 0 | 1 | 0 | 0 |
| Nck-associated protein 5-like OS=Homo sapiens GN=NCKAP5L PE=1 SV=2                                    | NCK5L_HUMAN    | 139 kDa | 0 | 0 | 1 | 0 |
| Dynein heavy chain 11, axonemal OS=Homo sapiens GN=DNH11 PE=1 SV=3                                    | DYH11_HUMAN    | 521 kDa | 0 | 0 | 0 | 1 |
| Probable JmjC domain-containing histone demethylase protein 2C OS=Homo sapiens GN=JMJD1C PE=1 SV=1    | JHD2C_HUMAN    | 285 kDa | 0 | 0 | 1 | 0 |
| Nipped-B-like protein OS=Homo sapiens GN=NIPBL PE=1 SV=2                                              | NIPBL_HUMAN    | 316 kDa | 0 | 0 | 1 | 0 |
| Pikachurin OS=Homo sapiens GN=EGFLAM PE=1 SV=2                                                        | EGFLA_HUMAN    | 111 kDa | 0 | 0 | 0 | 1 |
| Proteasome subunit alpha type-7 OS=Homo sapiens GN=PSMA7 PE=1 SV=1                                    | PSA7_HUMAN     | 28 kDa  | 0 | 1 | 1 | 1 |
| Retinoic acid-induced protein 3 OS=Homo sapiens GN=GPRC5A PE=1 SV=2                                   | RAI3_HUMAN     | 40 kDa  | 0 | 1 | 2 | 3 |
| Two pore calcium channel protein 2 OS=Homo sapiens GN=TPCN2 PE=1 SV=2                                 | TPC2_HUMAN     | 85 kDa  | 0 | 0 | 1 | 0 |
| Aldo-keto reductase family 1 member B10 OS=Homo sapiens GN=AKR1B10 PE=1 SV=2                          | AK1B10_HUMAN   | 36 kDa  | 0 | 3 | 0 | 2 |
| Dynein heavy chain domain-containing protein 1 OS=Homo sapiens GN=DNHD1 PE=1 SV=2                     | DNHD1_HUMAN    | 534 kDa | 0 | 0 | 1 | 0 |
| SCO-spondin OS=Homo sapiens GN=SSPO PE=2 SV=1                                                         | SSPO_HUMAN     | 547 kDa | 0 | 0 | 2 | 0 |
| Spectrin beta chain, brain 4 OS=Homo sapiens GN=SPTBN5 PE=1 SV=1                                      | SPTN5_HUMAN    | 417 kDa | 0 | 0 | 1 | 0 |
| Methionine--tRNA ligase, cytoplasmic OS=Homo sapiens GN=MARS PE=1 SV=2                                | SYMC_HUMAN     | 101 kDa | 0 | 0 | 2 | 0 |
| Tyrosine-protein kinase JAK3 OS=Homo sapiens GN=JAK3 PE=1 SV=2                                        | JAK3_HUMAN     | 125 kDa | 0 | 0 | 1 | 0 |
| Secretory phospholipase A2 receptor OS=Homo sapiens GN=PLA2R1 PE=1 SV=2                               | PLA2R_HUMAN    | 169 kDa | 0 | 1 | 0 | 0 |
| Calmodulin-regulated spectrin-associated protein 1 OS=Homo sapiens GN=CAMSAP1 PE=1 SV=2               | CAMP1_HUMAN    | 178 kDa | 0 | 0 | 0 | 1 |
| Early endosome antigen 1 OS=Homo sapiens GN=EEA1 PE=1 SV=2                                            | EEA1_HUMAN     | 162 kDa | 0 | 0 | 0 | 1 |
| Collagen alpha-1(IX) chain OS=Homo sapiens GN=COL9A1 PE=1 SV=3                                        | CO9A1_HUMAN    | 92 kDa  | 0 | 0 | 1 | 0 |
| Laminin subunit beta-1 OS=Homo sapiens GN=LAMB1 PE=1 SV=2                                             | LAMB1_HUMAN    | 198 kDa | 0 | 2 | 0 | 0 |
| E3 ubiquitin-protein ligase UBR3 OS=Homo sapiens GN=UBR3 PE=2 SV=2                                    | UBR3_HUMAN     | 212 kDa | 0 | 0 | 0 | 1 |
| CAP-Gly domain-containing linker protein 1 OS=Homo sapiens GN=CLIP1 PE=1 SV=2                         | CLIP1_HUMAN    | 162 kDa | 0 | 0 | 1 | 0 |
| Collagen alpha-3(VI) chain OS=Homo sapiens GN=COL6A3 PE=1 SV=5                                        | CO6A3_HUMAN    | 344 kDa | 0 | 1 | 0 | 0 |

|                                                                                                                                        |              |         |   |   |   |   |
|----------------------------------------------------------------------------------------------------------------------------------------|--------------|---------|---|---|---|---|
| Tyrosine-protein kinase HCK OS=Homo sapiens GN=HCK PE=1 SV=5                                                                           | HCK_HUMAN    | 60 kDa  | 0 | 1 | 1 | 0 |
| Low-density lipoprotein receptor-related protein 1B OS=Homo sapiens GN=LRP1B PE=1 SV=2                                                 | LRP1B_HUMAN  | 515 kDa | 0 | 0 | 2 | 1 |
| Dynein heavy chain 12, axonemal OS=Homo sapiens GN=DNAH12 PE=1 SV=2                                                                    | DYH12_HUMAN  | 357 kDa | 0 | 1 | 0 | 1 |
| Coatomer subunit alpha OS=Homo sapiens GN=COPA PE=1 SV=2                                                                               | COPA_HUMAN   | 138 kDa | 0 | 0 | 1 | 0 |
| Sorbin and SH3 domain-containing protein 2 OS=Homo sapiens GN=SORBS2 PE=1 SV=3                                                         | SRBS2_HUMAN  | 124 kDa | 0 | 1 | 1 | 1 |
| T-complex protein 1 subunit zeta OS=Homo sapiens GN=CCT6A PE=1 SV=3                                                                    | TCPZ_HUMAN   | 58 kDa  | 0 | 2 | 2 | 3 |
| Uncharacterized protein KIAA1683 OS=Homo sapiens GN=KIAA1683 PE=1 SV=1                                                                 | K1683_HUMAN  | 128 kDa | 0 | 0 | 2 | 1 |
| Stress-70 protein, mitochondrial OS=Homo sapiens GN=HSPA9 PE=1 SV=2                                                                    | GRP75_HUMAN  | 74 kDa  | 0 | 0 | 2 | 1 |
| WD repeat-containing protein 87 OS=Homo sapiens GN=WDR87 PE=2 SV=3                                                                     | WDR87_HUMAN  | 333 kDa | 0 | 0 | 1 | 1 |
| Eukaryotic initiation factor 4A-I OS=Homo sapiens GN=EIF4A1 PE=1 SV=1                                                                  | IF4A1_HUMAN  | 46 kDa  | 0 | 2 | 0 | 2 |
| Laminin subunit beta-4 OS=Homo sapiens GN=LAMB4 PE=2 SV=1                                                                              | LAMB4_HUMAN  | 194 kDa | 0 | 1 | 0 | 3 |
| Basement membrane-specific heparan sulfate proteoglycan core protein OS=Homo sapiens GN=HSPG2 PE=1 SV=1                                | PGBM_HUMAN   | 469 kDa | 0 | 1 | 0 | 0 |
| Alpha-enolase OS=Homo sapiens GN=ENO1 PE=1 SV=2                                                                                        | ENOA_HUMAN   | 47 kDa  | 0 | 3 | 0 | 2 |
| E3 ubiquitin-protein ligase TTC3 OS=Homo sapiens GN=TTC3 PE=1 SV=2                                                                     | TTC3_HUMAN   | 230 kDa | 0 | 1 | 0 | 2 |
| Signal-induced proliferation-associated 1-like protein 3 OS=Homo sapiens GN=SIPA1L3 PE=1 SV=3                                          | SI1L3_HUMAN  | 195 kDa | 0 | 1 | 0 | 0 |
| Fibrocystin OS=Homo sapiens GN=PKHD1 PE=1 SV=1                                                                                         | PKHD1_HUMAN  | 447 kDa | 0 | 1 | 0 | 0 |
| Cofilin-1 OS=Homo sapiens GN=CFL1 PE=1 SV=3                                                                                            | COF1_HUMAN   | 19 kDa  | 0 | 3 | 0 | 2 |
| Annexin A1 OS=Homo sapiens GN=ANXA1 PE=1 SV=2                                                                                          | ANXA1_HUMAN  | 39 kDa  | 0 | 4 | 0 | 1 |
| Ninein OS=Homo sapiens GN=NIN PE=1 SV=4                                                                                                | NIN_HUMAN    | 243 kDa | 0 | 0 | 1 | 2 |
| Threonine synthase-like 2 OS=Homo sapiens GN=THNSL2 PE=2 SV=3                                                                          | THNS2_HUMAN  | 54 kDa  | 0 | 1 | 0 | 1 |
| WD repeat-containing protein 24 OS=Homo sapiens GN=WDR24 PE=1 SV=1                                                                     | WDR24_HUMAN  | 102 kDa | 0 | 0 | 0 | 1 |
| Thrombospondin type-1 domain-containing protein 7A OS=Homo sapiens GN=THSD7A PE=1 SV=4                                                 | THS7A_HUMAN  | 185 kDa | 0 | 0 | 1 | 0 |
| Low-density lipoprotein receptor-related protein 4 OS=Homo sapiens GN=LRP4 PE=1 SV=4                                                   | LRP4_HUMAN   | 212 kDa | 0 | 0 | 1 | 0 |
| Retinoic acid-induced protein 1 OS=Homo sapiens GN=RAI1 PE=1 SV=2                                                                      | RAI1_HUMAN   | 203 kDa | 0 | 0 | 0 | 1 |
| Apolipoprotein B-100 OS=Homo sapiens GN=APOB PE=1 SV=2                                                                                 | APOB_HUMAN   | 516 kDa | 0 | 0 | 1 | 0 |
| Unconventional myosin-Vc OS=Homo sapiens GN=MYO5C PE=1 SV=2                                                                            | MYO5C_HUMAN  | 203 kDa | 0 | 0 | 1 | 0 |
| Reelin OS=Homo sapiens GN=RELN PE=1 SV=3                                                                                               | RELN_HUMAN   | 388 kDa | 0 | 0 | 1 | 0 |
| Kelch repeat and BTB domain-containing protein 2 OS=Homo sapiens GN=KBTBD2 PE=2 SV=2                                                   | KBTBD2_HUMAN | 71 kDa  | 0 | 0 | 1 | 0 |
| Myocardial zonula adherens protein OS=Homo sapiens GN=MYZAP PE=1 SV=1                                                                  | MYZAP_HUMAN  | 54 kDa  | 0 | 0 | 0 | 1 |
| E3 ubiquitin-protein ligase UBR1 OS=Homo sapiens GN=UBR1 PE=1 SV=1                                                                     | UBR1_HUMAN   | 200 kDa | 0 | 0 | 3 | 0 |
| Calcineurin-binding protein cabin-1 OS=Homo sapiens GN=CABIN1 PE=1 SV=1                                                                | CABIN_HUMAN  | 246 kDa | 0 | 0 | 0 | 1 |
| HEAT repeat-containing protein 7B1 OS=Homo sapiens GN=HEATR7B1 PE=4 SV=3                                                               | HTRB1_HUMAN  | 193 kDa | 0 | 0 | 1 | 0 |
| EF-hand domain-containing family member B OS=Homo sapiens GN=EFHB PE=2 SV=4                                                            | EFHB_HUMAN   | 94 kDa  | 0 | 1 | 0 | 0 |
| Polycystic kidney disease protein 1-like 1 OS=Homo sapiens GN=PKD1L1 PE=2 SV=1                                                         | PK1L1_HUMAN  | 315 kDa | 0 | 1 | 0 | 0 |
| UHRF1-binding protein 1-like OS=Homo sapiens GN=UHRF1BP1L PE=1 SV=2                                                                    | UH1BL_HUMAN  | 164 kDa | 0 | 1 | 0 | 0 |
| SWI/SNF-related matrix-associated actin-dependent regulator of chromatin subfamily A-like protein 1 OS=Homo sapiens GN=SMAL1 PE=1 SV=1 | SMAL1_HUMAN  | 106 kDa | 0 | 1 | 0 | 0 |
| Histone-lysine N-methyltransferase SETDB1 OS=Homo sapiens GN=SETDB1 PE=1 SV=1                                                          | SETB1_HUMAN  | 143 kDa | 0 | 0 | 0 | 1 |
| Rho GTPase-activating protein 35 OS=Homo sapiens GN=ARHGAP35 PE=1 SV=2                                                                 | RHG35_HUMAN  | 172 kDa | 0 | 1 | 0 | 0 |
| Splicing factor 3B subunit 3 OS=Homo sapiens GN=SF3B3 PE=1 SV=4                                                                        | SF3B3_HUMAN  | 136 kDa | 0 | 2 | 2 | 1 |
| ATP synthase subunit alpha, mitochondrial OS=Homo sapiens GN=ATP5A1 PE=1 SV=1                                                          | ATPA_HUMAN   | 60 kDa  | 0 | 1 | 2 | 1 |
| Sperm-specific antigen 2 OS=Homo sapiens GN=SSFA2 PE=1 SV=3                                                                            | SSFA2_HUMAN  | 138 kDa | 0 | 1 | 1 | 2 |
| G-protein coupled receptor 98 OS=Homo sapiens GN=GPR98 PE=1 SV=2                                                                       | GPR98_HUMAN  | 693 kDa | 0 | 1 | 0 | 0 |
| Protein FAM184B OS=Homo sapiens GN=FAM184B PE=2 SV=3                                                                                   | F184B_HUMAN  | 121 kDa | 0 | 1 | 1 | 0 |
| Dynein heavy chain 5, axonemal OS=Homo sapiens GN=DNAH5 PE=1 SV=3                                                                      | DYH5_HUMAN   | 529 kDa | 0 | 0 | 1 | 0 |
| Band 4.1-like protein 2 OS=Homo sapiens GN=EPB41L2 PE=1 SV=1                                                                           | E41L2_HUMAN  | 113 kDa | 0 | 1 | 1 | 0 |
| Baculoviral IAP repeat-containing protein 2 OS=Homo sapiens GN=BIRC2 PE=1 SV=2                                                         | BIRC2_HUMAN  | 70 kDa  | 0 | 0 | 0 | 1 |
| Midasin OS=Homo sapiens GN=MDN1 PE=1 SV=2                                                                                              | MDN1_HUMAN   | 633 kDa | 0 | 1 | 0 | 1 |
| UDP-glucose:glycoprotein glucosyltransferase 2 OS=Homo sapiens GN=UGGT2 PE=1 SV=4                                                      | UGG2_HUMAN   | 175 kDa | 0 | 0 | 1 | 0 |
| SLIT-ROBO Rho GTPase-activating protein 1 OS=Homo sapiens GN=SRGAP1 PE=1 SV=1                                                          | SRGP1_HUMAN  | 124 kDa | 0 | 0 | 1 | 0 |
| A-kinase anchor protein 13 OS=Homo sapiens GN=AKAP13 PE=1 SV=2                                                                         | AKP13_HUMAN  | 308 kDa | 0 | 0 | 1 | 0 |
| Antigen KI-67 OS=Homo sapiens GN=MKI67 PE=1 SV=2                                                                                       | KI67_HUMAN   | 359 kDa | 0 | 0 | 1 | 0 |
| Otogelin OS=Homo sapiens GN=OTOG PE=2 SV=3                                                                                             | OTOG_HUMAN   | 315 kDa | 0 | 1 | 1 | 0 |
| Putative uncharacterized protein C12orf63 OS=Homo sapiens GN=C12orf63 PE=2 SV=2                                                        | CL063_HUMAN  | 136 kDa | 0 | 0 | 1 | 0 |
| Laminin subunit beta-3 OS=Homo sapiens GN=LAMB3 PE=1 SV=1                                                                              | LAMB3_HUMAN  | 130 kDa | 0 | 0 | 1 | 0 |
| Periaxin OS=Homo sapiens GN=PRX PE=1 SV=2                                                                                              | PRAX_HUMAN   | 155 kDa | 0 | 0 | 0 | 1 |
| Toll-like receptor 7 OS=Homo sapiens GN=TLR7 PE=1 SV=1                                                                                 | TLR7_HUMAN   | 121 kDa | 0 | 1 | 0 | 1 |
| Serine/threonine-protein kinase DCLK2 OS=Homo sapiens GN=DCLK2 PE=2 SV=4                                                               | DCLK2_HUMAN  | 84 kDa  | 0 | 0 | 1 | 0 |
| Ras-related protein Rab-10 OS=Homo sapiens GN=RAB10 PE=1 SV=1                                                                          | RAB10_HUMAN  | 23 kDa  | 0 | 0 | 1 | 0 |
| Nuclear mitotic apparatus protein 1 OS=Homo sapiens GN=NUMA1 PE=1 SV=2                                                                 | NUMA1_HUMAN  | 238 kDa | 0 | 2 | 2 | 0 |
| E3 ubiquitin-protein ligase TRIM37 OS=Homo sapiens GN=TRIM37 PE=1 SV=2                                                                 | TRI37_HUMAN  | 108 kDa | 0 | 0 | 2 | 1 |
| Eukaryotic translation initiation factor 3 subunit C OS=Homo sapiens GN=EIF3C PE=1 SV=1                                                | EIF3C_HUMAN  | 105 kDa | 0 | 1 | 1 | 0 |
| Zinc finger protein DZIP1 OS=Homo sapiens GN=DZIP1 PE=1 SV=1                                                                           | DZIP1_HUMAN  | 99 kDa  | 0 | 0 | 1 | 1 |
| Structural maintenance of chromosomes protein 1B OS=Homo sapiens GN=SMC1B PE=1 SV=2                                                    | SMC1B_HUMAN  | 144 kDa | 0 | 1 | 1 | 0 |
| Collagen alpha-4(IV) chain OS=Homo sapiens GN=COL4A4 PE=1 SV=3                                                                         | CO4A4_HUMAN  | 164 kDa | 0 | 0 | 1 | 0 |
| Coiled-coil domain-containing protein 171 OS=Homo sapiens GN=CCDC171 PE=2 SV=1                                                         | CC171_HUMAN  | 153 kDa | 0 | 0 | 1 | 0 |
| DnaJ homolog subfamily C member 13 OS=Homo sapiens GN=DNAJC13 PE=1 SV=5                                                                | DJC13_HUMAN  | 254 kDa | 0 | 1 | 1 | 0 |
| Complement component C7 OS=Homo sapiens GN=C7 PE=1 SV=2                                                                                | CO7_HUMAN    | 94 kDa  | 0 | 0 | 1 | 0 |
| Inactive dual specificity phosphatase 27 OS=Homo sapiens GN=DUSP27 PE=2 SV=1                                                           | DUS27_HUMAN  | 130 kDa | 0 | 0 | 1 | 0 |
| Signal peptide, CUB and EGF-like domain-containing protein 2 OS=Homo sapiens GN=SCUBE2 PE=2 SV=2                                       | SCUB2_HUMAN  | 110 kDa | 0 | 0 | 0 | 1 |
| CREB-binding protein OS=Homo sapiens GN=CREBBP PE=1 SV=3                                                                               | CBP_HUMAN    | 265 kDa | 0 | 0 | 1 | 0 |
| T-box transcription factor TBX20 OS=Homo sapiens GN=TBX20 PE=1 SV=4                                                                    | TBX20_HUMAN  | 49 kDa  | 0 | 0 | 1 | 0 |
| Anoctamin-3 OS=Homo sapiens GN=ANO3 PE=2 SV=2                                                                                          | ANO3_HUMAN   | 115 kDa | 0 | 0 | 1 | 0 |
| Dual specificity protein phosphatase 16 OS=Homo sapiens GN=DUSP16 PE=1 SV=1                                                            | DUS16_HUMAN  | 73 kDa  | 0 | 0 | 1 | 0 |
| Filamin A-interacting protein 1-like OS=Homo sapiens GN=FLIPI1L PE=1 SV=2                                                              | FIL1L_HUMAN  | 130 kDa | 0 | 1 | 0 | 0 |
| Laminin subunit alpha-3 OS=Homo sapiens GN=LAMA3 PE=1 SV=2                                                                             | LAMA3_HUMAN  | 367 kDa | 0 | 0 | 0 | 1 |
| A disintegrin and metalloproteinase with thrombospondin motifs 19 OS=Homo sapiens GN=ADAMTS19 PE=1 SV=1                                | ATS19_HUMAN  | 134 kDa | 0 | 0 | 1 | 0 |
| MAP7 domain-containing protein 3 OS=Homo sapiens GN=MAP7D3 PE=1 SV=2                                                                   | MA7D3_HUMAN  | 98 kDa  | 0 | 0 | 0 | 1 |
| Leucine--tRNA ligase, cytoplasmic OS=Homo sapiens GN=LARS PE=1 SV=2                                                                    | SYLC_HUMAN   | 134 kDa | 0 | 0 | 2 | 0 |
| Putative heat shock protein HSP 90-beta-3 OS=Homo sapiens GN=HSP90AB3P PE=5 SV=1                                                       | H90B3_HUMAN  | 68 kDa  | 0 | 2 | 0 | 0 |
| Tensin-1 OS=Homo sapiens GN=TNS1 PE=1 SV=2                                                                                             | TENS1_HUMAN  | 186 kDa | 0 | 1 | 0 | 0 |
| DNA topoisomerase 2-beta OS=Homo sapiens GN=TOP2B PE=1 SV=3                                                                            | TOP2B_HUMAN  | 183 kDa | 0 | 0 | 0 | 1 |
| Interferon-induced guanylate-binding protein 1 OS=Homo sapiens GN=GBP1 PE=1 SV=2                                                       | GBP1_HUMAN   | 68 kDa  | 0 | 0 | 0 | 1 |

|                                                                                                                |                   |         |   |   |   |   |
|----------------------------------------------------------------------------------------------------------------|-------------------|---------|---|---|---|---|
| Vacuolar protein sorting-associated protein 4A OS=Homo sapiens GN=VPS4A PE=1 SV=1                              | VPS4A_HUMAN       | 49 kDa  | 0 | 0 | 0 | 1 |
| Ankyrin repeat domain-containing protein 12 OS=Homo sapiens GN=ANKRD12 PE=1 SV=3                               | ANKR12_HUMAN      | 236 kDa | 0 | 0 | 1 | 0 |
| Regulator of G-protein signaling 12 OS=Homo sapiens GN=RGS12 PE=1 SV=1                                         | RGS12_HUMAN       | 156 kDa | 0 | 0 | 1 | 0 |
| Collagen alpha-1(V) chain OS=Homo sapiens GN=COL5A1 PE=1 SV=3                                                  | COS1A1_HUMAN      | 184 kDa | 0 | 0 | 0 | 1 |
| Dynein heavy chain 1, axonemal OS=Homo sapiens GN=DNAH1 PE=1 SV=4                                              | DYH1_HUMAN        | 494 kDa | 0 | 0 | 1 | 0 |
| Rootletin OS=Homo sapiens GN=CROCC PE=1 SV=1                                                                   | CROCC_HUMAN       | 229 kDa | 0 | 1 | 0 | 0 |
| HEAT repeat-containing protein 5A OS=Homo sapiens GN=HEATR5A PE=1 SV=2                                         | HTR5A_HUMAN       | 222 kDa | 0 | 1 | 0 | 0 |
| Alpha-2-macroglobulin OS=Homo sapiens GN=A2M PE=1 SV=3                                                         | A2MG_HUMAN        | 163 kDa | 0 | 1 | 0 | 0 |
| Signal-induced proliferation-associated 1-like protein 2 OS=Homo sapiens GN=SIPA1L2 PE=1 SV=2                  | SI1L2_HUMAN       | 190 kDa | 0 | 0 | 2 | 0 |
| 1-phosphatidylinositol 3-phosphate 5-kinase OS=Homo sapiens GN=PIKFYVE PE=1 SV=3                               | FYV1_HUMAN        | 237 kDa | 0 | 1 | 0 | 0 |
| Leucine-rich repeat-containing protein 16A OS=Homo sapiens GN=LRRCL16A PE=1 SV=1                               | LR16A_HUMAN       | 152 kDa | 0 | 0 | 1 | 0 |
| Protein FAM208B OS=Homo sapiens GN=FAM208B PE=1 SV=1                                                           | F208B_HUMAN       | 269 kDa | 0 | 1 | 0 | 0 |
| Adenylyl cyclase-associated protein 1 OS=Homo sapiens GN=CAP1 PE=1 SV=5                                        | CAP1_HUMAN        | 52 kDa  | 0 | 0 | 1 | 0 |
| Clathrin heavy chain 2 OS=Homo sapiens GN=CLTCL1 PE=1 SV=2                                                     | CLH2_HUMAN        | 187 kDa | 0 | 1 | 0 | 0 |
| GAS2-like protein 2 OS=Homo sapiens GN=GAS2L2 PE=2 SV=1                                                        | GA2L2_HUMAN       | 97 kDa  | 0 | 1 | 0 | 0 |
| Eukaryotic translation initiation factor 3 subunit B OS=Homo sapiens GN=EIF3B PE=1 SV=3                        | EIF3B_HUMAN       | 92 kDa  | 0 | 4 | 0 | 0 |
| Uncharacterized protein KIAA1109 OS=Homo sapiens GN=KIAA1109 PE=1 SV=2                                         | K1109_HUMAN       | 555 kDa | 0 | 0 | 0 | 2 |
| Rho-associated protein kinase 1 OS=Homo sapiens GN=ROCK1 PE=1 SV=1                                             | ROCK1_HUMAN       | 158 kDa | 0 | 0 | 2 | 0 |
| Golgin subfamily B member 1 OS=Homo sapiens GN=GOLGB1 PE=1 SV=2                                                | GGB1_HUMAN        | 376 kDa | 0 | 0 | 1 | 0 |
| Kinesin-like protein KIF20B OS=Homo sapiens GN=KIF20B PE=1 SV=3                                                | KI20B_HUMAN       | 211 kDa | 0 | 0 | 0 | 1 |
| Microtubule-associated tumor suppressor candidate 2 OS=Homo sapiens GN=MTUS2 PE=1 SV=3                         | MTUS2_HUMAN       | 150 kDa | 0 | 1 | 0 | 0 |
| Heat shock protein 75 kDa, mitochondrial OS=Homo sapiens GN=TRAP1 PE=1 SV=3                                    | TRAP1_HUMAN       | 80 kDa  | 0 | 1 | 0 | 0 |
| Zinc finger CCH domain-containing protein 3 OS=Homo sapiens GN=ZC3H3 PE=1 SV=3                                 | ZC3H3_HUMAN       | 102 kDa | 0 | 1 | 0 | 0 |
| FYVE, RhoGEF and PH domain-containing protein 4 OS=Homo sapiens GN=FGD4 PE=1 SV=2                              | FGD4_HUMAN        | 87 kDa  | 0 | 0 | 1 | 0 |
| Uncharacterized protein C6orf10 OS=Homo sapiens GN=C6orf10 PE=1 SV=3                                           | CF010_HUMAN       | 62 kDa  | 0 | 0 | 1 | 0 |
| Extended synaptotagmin-3 OS=Homo sapiens GN=ESYT3 PE=2 SV=1                                                    | ESYT3_HUMAN       | 100 kDa | 0 | 0 | 1 | 0 |
| AT-rich interactive domain-containing protein 4B OS=Homo sapiens GN=ARID4B PE=1 SV=2                           | ARI4B_HUMAN       | 148 kDa | 0 | 1 | 0 | 0 |
| MCM domain-containing protein 2 OS=Homo sapiens GN=MCMD2 PE=1 SV=3                                             | MCMD2_HUMAN       | 76 kDa  | 0 | 0 | 0 | 1 |
| Myotubularin-related protein 13 OS=Homo sapiens GN=SBF2 PE=1 SV=1                                              | MTMRD_HUMAN       | 208 kDa | 0 | 1 | 0 | 0 |
| Deleted in lung and esophageal cancer protein 1 OS=Homo sapiens GN=DLEC1 PE=2 SV=2                             | DLEC1_HUMAN       | 196 kDa | 0 | 0 | 0 | 1 |
| Tetratricopeptide repeat protein 21B OS=Homo sapiens GN=TTC21B PE=1 SV=2                                       | TT21B_HUMAN       | 151 kDa | 0 | 1 | 0 | 0 |
| Neurexin-3-alpha OS=Homo sapiens GN=NRXN3 PE=1 SV=4                                                            | NRX3A_HUMAN       | 181 kDa | 0 | 0 | 0 | 1 |
| Storkhead-box protein 1 OS=Homo sapiens GN=STOX1 PE=1 SV=2                                                     | STOX1_HUMAN       | 111 kDa | 0 | 1 | 0 | 0 |
| Tubulin polyglutamylase TTL6 OS=Homo sapiens GN=TTL6 PE=1 SV=2                                                 | TTL6_HUMAN        | 96 kDa  | 0 | 0 | 1 | 0 |
| Protein spire homolog 1 OS=Homo sapiens GN=SPIRE1 PE=1 SV=2                                                    | SPIR1_HUMAN       | 86 kDa  | 0 | 1 | 0 | 0 |
| Protein bassoon OS=Homo sapiens GN=BSN PE=1 SV=4                                                               | BSN_HUMAN         | 416 kDa | 0 | 1 | 1 | 1 |
| Dolichyl-diphosphooligosaccharide--protein glycosyltransferase subunit 1 OS=Homo sapiens GN=RPN1 PE=1 SV=1     | RPN1_HUMAN        | 69 kDa  | 0 | 1 | 1 | 1 |
| Glucose-6-phosphate 1-dehydrogenase OS=Homo sapiens GN=G6PD PE=1 SV=4                                          | G6PD_HUMAN        | 59 kDa  | 0 | 1 | 1 | 0 |
| Tumor necrosis factor receptor superfamily member 5 OS=Homo sapiens GN=CD40 PE=1 SV=1                          | TNR5_HUMAN        | 31 kDa  | 0 | 1 | 1 | 0 |
| Golgin subfamily A member 3 OS=Homo sapiens GN=GOLGA3 PE=1 SV=2                                                | GOGA3_HUMAN       | 167 kDa | 0 | 1 | 1 | 1 |
| Protein eyes shut homolog OS=Homo sapiens GN=EYS PE=1 SV=5                                                     | EYS_HUMAN         | 351 kDa | 0 | 1 | 1 | 0 |
| Ras-related protein Rab-35 OS=Homo sapiens GN=RAB35 PE=1 SV=1                                                  | RAB35_HUMAN       | 23 kDa  | 0 | 2 | 0 | 1 |
| Exportin-1 OS=Homo sapiens GN=XPO1 PE=1 SV=1                                                                   | XPO1_HUMAN        | 123 kDa | 0 | 0 | 2 | 1 |
| Breast cancer type 2 susceptibility protein OS=Homo sapiens GN=BRCA2 PE=1 SV=2                                 | BRCA2_HUMAN       | 384 kDa | 0 | 1 | 1 | 0 |
| Nuclear valosin-containing protein-like OS=Homo sapiens GN=NVL PE=1 SV=1                                       | NVL_HUMAN         | 95 kDa  | 0 | 0 | 2 | 1 |
| Actin-related protein 2 OS=Homo sapiens GN=ACTR2 PE=1 SV=1                                                     | ARP2_HUMAN        | 45 kDa  | 0 | 0 | 1 | 1 |
| Uveal autoantigen with coiled-coil domains and ankyrin repeats OS=Homo sapiens GN=UACA PE=1 SV=2               | UACA_HUMAN        | 163 kDa | 0 | 1 | 0 | 1 |
| Utrophin OS=Homo sapiens GN=UTRN PE=1 SV=2                                                                     | UTRO_HUMAN        | 394 kDa | 0 | 1 | 0 | 0 |
| Poly [ADP-ribose] polymerase 14 OS=Homo sapiens GN=PARP14 PE=1 SV=3                                            | PAR14_HUMAN       | 203 kDa | 0 | 0 | 1 | 0 |
| Protein AKNAD1 OS=Homo sapiens GN=AKNAD1 PE=2 SV=3                                                             | AKND1_HUMAN       | 93 kDa  | 0 | 1 | 0 | 0 |
| SET domain-containing protein 5 OS=Homo sapiens GN=SETD5 PE=1 SV=2                                             | SETD5_HUMAN       | 158 kDa | 0 | 0 | 1 | 0 |
| Putative uncharacterized protein C21orf77 OS=Homo sapiens GN=C21orf77 PE=5 SV=1                                | CU077_HUMAN       | 14 kDa  | 0 | 1 | 1 | 0 |
| Protein dpy-19 homolog 3 OS=Homo sapiens GN=DPY19L3 PE=2 SV=1                                                  | D19L3_HUMAN       | 83 kDa  | 0 | 0 | 1 | 0 |
| Serine/threonine-protein kinase MRCK beta OS=Homo sapiens GN=CDC42BPB PE=1 SV=2                                | MRCKB_HUMAN       | 194 kDa | 0 | 1 | 1 | 0 |
| Serine/threonine-protein kinase Nek11 OS=Homo sapiens GN=NEK11 PE=1 SV=2                                       | NEK11_HUMAN       | 74 kDa  | 0 | 1 | 0 | 1 |
| Mitogen-activated protein kinase kinase kinase 4 OS=Homo sapiens GN=MAP3K4 PE=1 SV=2                           | M3K4_HUMAN        | 182 kDa | 0 | 1 | 1 | 0 |
| Girdin OS=Homo sapiens GN=CCDC88A PE=1 SV=2                                                                    | GRDN_HUMAN        | 216 kDa | 0 | 1 | 0 | 0 |
| Uncharacterized protein CXorf22 OS=Homo sapiens GN=CXorf22 PE=2 SV=3                                           | CX022_HUMAN       | 110 kDa | 0 | 0 | 0 | 1 |
| Serine/threonine-protein kinase DCLK3 OS=Homo sapiens GN=DCLK3 PE=1 SV=2                                       | DCLK3_HUMAN       | 74 kDa  | 0 | 1 | 0 | 1 |
| 6-phosphofructokinase type C OS=Homo sapiens GN=PFKP PE=1 SV=2                                                 | K6PP_HUMAN        | 86 kDa  | 0 | 3 | 0 | 0 |
| Leucine-rich repeat-containing protein 17 OS=Homo sapiens GN=LRRCL17 PE=2 SV=1                                 | LRC17_HUMAN       | 52 kDa  | 0 | 1 | 0 | 0 |
| Integrator complex subunit 1 OS=Homo sapiens GN=INTS1 PE=1 SV=2                                                | INT1_HUMAN        | 244 kDa | 0 | 0 | 0 | 1 |
| BRCA1-associated RING domain protein 1 OS=Homo sapiens GN=BARD1 PE=1 SV=2                                      | BARD1_HUMAN       | 87 kDa  | 0 | 1 | 0 | 0 |
| ATP-binding cassette sub-family C member 8 OS=Homo sapiens GN=ABCC8 PE=1 SV=6                                  | ABCC8_HUMAN       | 177 kDa | 0 | 1 | 1 | 0 |
| Eukaryotic translation initiation factor 3 subunit A OS=Homo sapiens GN=EIF3A PE=1 SV=1                        | EIF3A_HUMAN       | 167 kDa | 0 | 2 | 1 | 0 |
| Probable threonine--tRNA ligase 2, cytoplasmic OS=Homo sapiens GN=TARSL2 PE=1 SV=1                             | SYTC2_HUMAN       | 93 kDa  | 0 | 1 | 0 | 0 |
| Disintegrin and metalloproteinase domain-containing protein 21 OS=Homo sapiens GN=ADAM21 PE=2 SV=3             | ADA21_HUMAN       | 81 kDa  | 0 | 0 | 1 | 0 |
| L-lactate dehydrogenase A chain OS=Homo sapiens GN=LDHA PE=1 SV=2                                              | LDHA_HUMAN        | 37 kDa  | 0 | 1 | 0 | 3 |
| Solute carrier family 45 member 3 OS=Homo sapiens GN=SLC45A3 PE=2 SV=1                                         | S45A3_HUMAN       | 59 kDa  | 0 | 1 | 1 | 0 |
| 26S proteasome non-ATPase regulatory subunit 1 OS=Homo sapiens GN=PSMD1 PE=1 SV=2                              | PSMD1_HUMAN       | 106 kDa | 0 | 2 | 0 | 1 |
| Complement component 1 Q subcomponent-binding protein, mitochondrial OS=Homo sapiens GN=C1QBFC1QBPF_HUMAN      | C1QBFC1QBPF_HUMAN | 31 kDa  | 0 | 1 | 0 | 2 |
| Zinc finger protein 556 OS=Homo sapiens GN=ZNF556 PE=2 SV=1                                                    | ZN556_HUMAN       | 52 kDa  | 0 | 1 | 1 | 0 |
| Protein jagged-2 OS=Homo sapiens GN=JAG2 PE=1 SV=3                                                             | JAG2_HUMAN        | 133 kDa | 0 | 0 | 1 | 1 |
| Acetyl-CoA carboxylase 1 OS=Homo sapiens GN=ACACA PE=1 SV=2                                                    | ACACA_HUMAN       | 266 kDa | 0 | 1 | 0 | 1 |
| Leucine-rich PPR motif-containing protein, mitochondrial OS=Homo sapiens GN=LRPPRC PE=1 SV=3                   | LRPPRC_HUMAN      | 158 kDa | 0 | 1 | 1 | 0 |
| Zinc finger protein 266 OS=Homo sapiens GN=ZNF266 PE=2 SV=2                                                    | ZN266_HUMAN       | 62 kDa  | 0 | 0 | 1 | 1 |
| Desmoplakin OS=Homo sapiens GN=DSP PE=1 SV=3                                                                   | DESP_HUMAN        | 332 kDa | 0 | 0 | 1 | 0 |
| UPF0606 protein KIAA1549 OS=Homo sapiens GN=KIAA1549 PE=1 SV=4                                                 | K1549_HUMAN       | 211 kDa | 0 | 1 | 0 | 0 |
| Serine/arginine repetitive matrix protein 2 OS=Homo sapiens GN=SRRM2 PE=1 SV=2                                 | SRRM2_HUMAN       | 300 kDa | 0 | 0 | 0 | 1 |
| Arf-GAP with coiled-coil, ANK repeat and PH domain-containing protein 3 OS=Homo sapiens GN=ACAP3 PIACAP3_HUMAN | ACAP3_HUMAN       | 92 kDa  | 0 | 2 | 0 | 1 |
| Rho GTPase-activating protein 23 OS=Homo sapiens GN=ARHGAP23 PE=1 SV=2                                         | RHG23_HUMAN       | 162 kDa | 0 | 1 | 0 | 0 |
| FYVE and coiled-coil domain-containing protein 1 OS=Homo sapiens GN=FYCO1 PE=1 SV=3                            | FYCO1_HUMAN       | 167 kDa | 0 | 1 | 0 | 0 |

|                                                                                                                 |             |         |   |   |   |   |
|-----------------------------------------------------------------------------------------------------------------|-------------|---------|---|---|---|---|
| Microtubule-associated protein 1A OS=Homo sapiens GN=MAP1A PE=1 SV=6                                            | MAP1A_HUMAN | 305 kDa | 0 | 1 | 1 | 0 |
| Triadin OS=Homo sapiens GN=TRDN PE=1 SV=4                                                                       | TRDN_HUMAN  | 82 kDa  | 0 | 0 | 1 | 0 |
| Msx2-interacting protein OS=Homo sapiens GN=SPEN PE=1 SV=1                                                      | MINT_HUMAN  | 402 kDa | 0 | 0 | 1 | 1 |
| DNA mismatch repair protein Msh6 OS=Homo sapiens GN=MSH6 PE=1 SV=2                                              | MSH6_HUMAN  | 153 kDa | 0 | 0 | 1 | 0 |
| Flap endonuclease 1 OS=Homo sapiens GN=FEN1 PE=1 SV=1                                                           | FEN1_HUMAN  | 43 kDa  | 0 | 0 | 0 | 1 |
| Translocation protein SEC63 homolog OS=Homo sapiens GN=SEC63 PE=1 SV=2                                          | SEC63_HUMAN | 88 kDa  | 0 | 0 | 0 | 1 |
| Actin-binding LIM protein 2 OS=Homo sapiens GN=ABLM2 PE=1 SV=2                                                  | ABLM2_HUMAN | 68 kDa  | 0 | 0 | 1 | 0 |
| Proline-, glutamic acid- and leucine-rich protein 1 OS=Homo sapiens GN=PELP1 PE=1 SV=2                          | PELP1_HUMAN | 120 kDa | 0 | 2 | 0 | 0 |
| Poly(ADP-ribose) glycohydrolase OS=Homo sapiens GN=PARG PE=1 SV=1                                               | PARG_HUMAN  | 111 kDa | 0 | 0 | 1 | 0 |
| C2 domain-containing protein 2 OS=Homo sapiens GN=C2CD2 PE=1 SV=2                                               | CUO25_HUMAN | 76 kDa  | 0 | 0 | 0 | 1 |
| Pleckstrin homology-like domain family B member 3 OS=Homo sapiens GN=PHLDB3 PE=2 SV=3                           | PHLB3_HUMAN | 72 kDa  | 0 | 0 | 0 | 1 |
| Protocadherin alpha-12 OS=Homo sapiens GN=PCDHA12 PE=2 SV=1                                                     | PCDAC_HUMAN | 102 kDa | 0 | 0 | 1 | 0 |
| RAS protein activator like-3 OS=Homo sapiens GN=RASAL3 PE=1 SV=2                                                | RASL3_HUMAN | 112 kDa | 0 | 0 | 1 | 0 |
| Probable E3 ubiquitin-protein ligase C12orf51 OS=Homo sapiens GN=C12orf51 PE=1 SV=5                             | KO614_HUMAN | 439 kDa | 0 | 1 | 0 | 0 |
| Unconventional myosin-XV OS=Homo sapiens GN=MYO15A PE=1 SV=2                                                    | MYO15_HUMAN | 395 kDa | 0 | 1 | 0 | 0 |
| Metallothionein-1A OS=Homo sapiens GN=MT1A PE=1 SV=2                                                            | MT1A_HUMAN  | 6 kDa   | 0 | 1 | 0 | 0 |
| Laminin subunit gamma-3 OS=Homo sapiens GN=LAMC3 PE=1 SV=3                                                      | LAMC3_HUMAN | 171 kDa | 0 | 0 | 1 | 0 |
| Synaptotagmin-17 OS=Homo sapiens GN=SYT17 PE=1 SV=1                                                             | SYT17_HUMAN | 54 kDa  | 0 | 0 | 1 | 0 |
| Zinc finger protein 28 homolog OS=Homo sapiens GN=ZFP28 PE=1 SV=1                                               | ZFP28_HUMAN | 99 kDa  | 0 | 1 | 0 | 0 |
| Nephrocystin-3 OS=Homo sapiens GN=NPHP3 PE=1 SV=1                                                               | NPHP3_HUMAN | 151 kDa | 0 | 0 | 1 | 0 |
| Heat shock 70 kDa protein 4 OS=Homo sapiens GN=HSPA4 PE=1 SV=4                                                  | HSP71_HUMAN | 94 kDa  | 0 | 0 | 1 | 0 |
| Protein furry homolog OS=Homo sapiens GN=FRY PE=1 SV=1                                                          | FRY_HUMAN   | 339 kDa | 0 | 1 | 0 | 0 |
| Fructose-bisphosphate aldolase A OS=Homo sapiens GN=ALDOA PE=1 SV=2                                             | ALDOA_HUMAN | 39 kDa  | 0 | 1 | 0 | 0 |
| Dedicator of cytokinesis protein 10 OS=Homo sapiens GN=DOCK10 PE=1 SV=3                                         | DOC10_HUMAN | 250 kDa | 0 | 2 | 0 | 0 |
| Adenylate kinase domain-containing protein 1 OS=Homo sapiens GN=AKD1 PE=1 SV=2                                  | AKD1_HUMAN  | 221 kDa | 0 | 1 | 0 | 0 |
| Ribosomal protein S6 kinase alpha-4 OS=Homo sapiens GN=RPS6KA4 PE=1 SV=1                                        | KS6A4_HUMAN | 86 kDa  | 0 | 1 | 0 | 0 |
| Polymerase I and transcript release factor OS=Homo sapiens GN=PTRF PE=1 SV=1                                    | PTRF_HUMAN  | 43 kDa  | 0 | 0 | 1 | 0 |
| Zinc finger protein 236 OS=Homo sapiens GN=ZNF236 PE=2 SV=2                                                     | ZN236_HUMAN | 204 kDa | 0 | 0 | 0 | 1 |
| Nucleolar protein 8 OS=Homo sapiens GN=NOL8 PE=1 SV=1                                                           | NOL8_HUMAN  | 132 kDa | 0 | 0 | 0 | 2 |
| Cat eye syndrome critical region protein 6 OS=Homo sapiens GN=CECR6 PE=2 SV=1                                   | CECR6_HUMAN | 58 kDa  | 0 | 0 | 0 | 1 |
| Integrin beta-4 OS=Homo sapiens GN=ITGB4 PE=1 SV=5                                                              | ITB4_HUMAN  | 202 kDa | 0 | 1 | 0 | 0 |
| Serine/threonine-protein kinase SMG1 OS=Homo sapiens GN=SMG1 PE=1 SV=3                                          | SMG1_HUMAN  | 410 kDa | 0 | 0 | 1 | 0 |
| Lupus La protein OS=Homo sapiens GN=SSB PE=1 SV=2                                                               | LA_HUMAN    | 47 kDa  | 0 | 0 | 0 | 1 |
| G protein-regulated inducer of neurite outgrowth 2 OS=Homo sapiens GN=GPRIN2 PE=1 SV=2                          | GRIN2_HUMAN | 47 kDa  | 0 | 0 | 1 | 0 |
| C-myc promoter-binding protein OS=Homo sapiens GN=DENND4A PE=1 SV=2                                             | MYCPP_HUMAN | 209 kDa | 0 | 0 | 1 | 0 |
| Gamma-tubulin complex component 2 OS=Homo sapiens GN=TUBGCP2 PE=1 SV=2                                          | GCP2_HUMAN  | 103 kDa | 0 | 0 | 0 | 1 |
| A disintegrin and metalloproteinase with thrombospondin motifs 16 OS=Homo sapiens GN=ADAMTS16 PE=1 SV=1         | ATS16_HUMAN | 136 kDa | 0 | 0 | 0 | 1 |
| Protein very KIND OS=Homo sapiens GN=KNDC1 PE=2 SV=2                                                            | VKIND_HUMAN | 191 kDa | 0 | 0 | 0 | 1 |
| Ezrin OS=Homo sapiens GN=EZR PE=1 SV=4                                                                          | EZR1_HUMAN  | 69 kDa  | 0 | 3 | 0 | 0 |
| Dedicator of cytokinesis protein 4 OS=Homo sapiens GN=DOCK4 PE=1 SV=3                                           | DOCK4_HUMAN | 225 kDa | 0 | 0 | 2 | 0 |
| RE1-silencing transcription factor OS=Homo sapiens GN=REST PE=1 SV=3                                            | REST_HUMAN  | 122 kDa | 0 | 0 | 0 | 2 |
| Tubulin polyglutamylase TTL4 OS=Homo sapiens GN=TTL4 PE=1 SV=2                                                  | TTL4_HUMAN  | 133 kDa | 0 | 2 | 0 | 0 |
| Kinesin-like protein KIF1B OS=Homo sapiens GN=KIF1B PE=1 SV=5                                                   | KIF1B_HUMAN | 204 kDa | 0 | 0 | 0 | 2 |
| Schlafen family member 11 OS=Homo sapiens GN=SLFN11 PE=1 SV=2                                                   | SLN11_HUMAN | 103 kDa | 0 | 0 | 2 | 0 |
| G patch domain-containing protein 1 OS=Homo sapiens GN=GPATCH1 PE=1 SV=1                                        | GPTC1_HUMAN | 103 kDa | 0 | 0 | 2 | 0 |
| RB1-inducible coiled-coil protein 1 OS=Homo sapiens GN=RB1CC1 PE=1 SV=3                                         | RBCC1_HUMAN | 183 kDa | 0 | 0 | 1 | 0 |
| Ras guanyl-releasing protein 3 OS=Homo sapiens GN=RASGRP3 PE=2 SV=1                                             | GRP3_HUMAN  | 78 kDa  | 0 | 0 | 1 | 0 |
| Phosphatidylinositol 3,4,5-trisphosphate-dependent Rac exchanger 1 protein OS=Homo sapiens GN=PREX: PREX1_HUMAN | PREX1_HUMAN | 186 kDa | 0 | 1 | 0 | 0 |
| Tyrosine-protein phosphatase non-receptor type 13 OS=Homo sapiens GN=PTPN13 PE=1 SV=2                           | PTN13_HUMAN | 277 kDa | 0 | 0 | 1 | 0 |
| 1-phosphatidylinositol 4,5-bisphosphate phosphodiesterase eta-1 OS=Homo sapiens GN=PLCH1 PE=1 SV=1              | PLCH1_HUMAN | 189 kDa | 0 | 0 | 1 | 0 |
| Mitogen-activated protein kinase kinase kinase 1 OS=Homo sapiens GN=MAP3K1 PE=1 SV=4                            | M3K1_HUMAN  | 164 kDa | 0 | 0 | 0 | 1 |
| Replication factor C subunit 1 OS=Homo sapiens GN=RFC1 PE=1 SV=4                                                | RFC1_HUMAN  | 128 kDa | 0 | 1 | 0 | 0 |
| Mitogen-activated protein kinase-binding protein 1 OS=Homo sapiens GN=MAPKBP1 PE=2 SV=4                         | MABP1_HUMAN | 164 kDa | 0 | 0 | 1 | 0 |
| Rho guanine nucleotide exchange factor 26 OS=Homo sapiens GN=ARHGEF26 PE=1 SV=4                                 | ARHGQ_HUMAN | 97 kDa  | 0 | 0 | 0 | 1 |
| FRAS1-related extracellular matrix protein 2 OS=Homo sapiens GN=FREM2 PE=1 SV=2                                 | FREM2_HUMAN | 351 kDa | 0 | 0 | 0 | 1 |
| Serine hydroxymethyltransferase, mitochondrial OS=Homo sapiens GN=SHMT2 PE=1 SV=3                               | GLYM_HUMAN  | 56 kDa  | 0 | 0 | 0 | 1 |
| Zinc finger homeobox protein 4 OS=Homo sapiens GN=ZFHX4 PE=1 SV=1                                               | ZFHX4_HUMAN | 394 kDa | 0 | 0 | 0 | 1 |
| Cysteine-rich secretory protein LCCL domain-containing 2 OS=Homo sapiens GN=CRISPLD2 PE=1 SV=1                  | CLRD2_HUMAN | 56 kDa  | 0 | 1 | 0 | 0 |
| Putative uncharacterized protein KIRREL3-AS3 OS=Homo sapiens GN=KIRREL3-AS3 PE=5 SV=1                           | KIAS3_HUMAN | 26 kDa  | 0 | 1 | 0 | 0 |
| Copine-2 OS=Homo sapiens GN=CPNE2 PE=1 SV=3                                                                     | CPNE2_HUMAN | 61 kDa  | 0 | 0 | 1 | 0 |
| GRIP and coiled-coil domain-containing protein 1 OS=Homo sapiens GN=GCC1 PE=1 SV=1                              | GCC1_HUMAN  | 88 kDa  | 0 | 0 | 1 | 0 |
| Protein RRP5 homolog OS=Homo sapiens GN=PCDC11 PE=1 SV=3                                                        | RRP5_HUMAN  | 209 kDa | 0 | 0 | 1 | 0 |
| Histone-lysine N-methyltransferase SETD1B OS=Homo sapiens GN=SETD1B PE=1 SV=2                                   | SET1B_HUMAN | 209 kDa | 0 | 0 | 1 | 0 |
| Extracellular sulfatase Sulf-1 OS=Homo sapiens GN=SULF1 PE=1 SV=1                                               | SULF1_HUMAN | 101 kDa | 0 | 0 | 0 | 1 |
| Zinc finger and BTB domain-containing protein 37 OS=Homo sapiens GN=ZBTB37 PE=2 SV=1                            | ZBT37_HUMAN | 56 kDa  | 0 | 0 | 0 | 1 |
| Polyamine-modulated factor 1-binding protein 1 OS=Homo sapiens GN=PMFBP1 PE=2 SV=1                              | PMFBP_HUMAN | 119 kDa | 0 | 1 | 0 | 0 |
| GPI inositol-deacylase OS=Homo sapiens GN=PGAP1 PE=2 SV=1                                                       | PGAP1_HUMAN | 105 kDa | 0 | 0 | 1 | 0 |
| SLIT and NTRK-like protein 4 OS=Homo sapiens GN=SLITRK4 PE=2 SV=1                                               | SLIK4_HUMAN | 94 kDa  | 0 | 0 | 1 | 0 |
| Retinoblastoma-like protein 1 OS=Homo sapiens GN=RBL1 PE=1 SV=3                                                 | RBL1_HUMAN  | 121 kDa | 0 | 1 | 0 | 0 |
| Muscular LMNA-interacting protein OS=Homo sapiens GN=MLIP PE=1 SV=3                                             | MLIP_HUMAN  | 50 kDa  | 0 | 1 | 0 | 0 |
| Myosin-IIIa OS=Homo sapiens GN=MYO3A PE=1 SV=2                                                                  | MYO3A_HUMAN | 186 kDa | 0 | 1 | 0 | 0 |
| Death-inducer obliterator 1 OS=Homo sapiens GN=DIDO1 PE=1 SV=5                                                  | DIDO1_HUMAN | 244 kDa | 0 | 1 | 0 | 0 |
| mTERF domain-containing protein 2 OS=Homo sapiens GN=MTERFD2 PE=1 SV=3                                          | MTER2_HUMAN | 44 kDa  | 0 | 0 | 1 | 0 |
| Receptor-type tyrosine-protein phosphatase U OS=Homo sapiens GN=PTPRU PE=1 SV=2                                 | PTPRU_HUMAN | 162 kDa | 0 | 0 | 1 | 0 |
| Dynein heavy chain 8, axonemal OS=Homo sapiens GN=DNAH8 PE=1 SV=2                                               | DYH8_HUMAN  | 515 kDa | 0 | 1 | 0 | 1 |
| Leucine-rich repeat serine/threonine-protein kinase 2 OS=Homo sapiens GN=LRRK2 PE=1 SV=2                        | LRRK2_HUMAN | 286 kDa | 0 | 1 | 1 | 1 |
| L-lactate dehydrogenase B chain OS=Homo sapiens GN=LDHB PE=1 SV=2                                               | LDHB_HUMAN  | 37 kDa  | 0 | 2 | 1 | 1 |
| Caldesmon OS=Homo sapiens GN=CALD1 PE=1 SV=3                                                                    | CALD1_HUMAN | 93 kDa  | 0 | 1 | 1 | 2 |
| Calnexin OS=Homo sapiens GN=CANX PE=1 SV=2                                                                      | CALX_HUMAN  | 68 kDa  | 0 | 1 | 1 | 2 |
| Elongation factor 1-gamma OS=Homo sapiens GN=EEF1G PE=1 SV=3                                                    | EF1G_HUMAN  | 50 kDa  | 0 | 2 | 1 | 1 |
| Uncharacterized protein C4orf21 OS=Homo sapiens GN=C4orf21 PE=1 SV=2                                            | CD021_HUMAN | 119 kDa | 0 | 0 | 1 | 1 |
| von Willebrand factor D and EGF domain-containing protein OS=Homo sapiens GN=VWDE PE=2 SV=4                     | VWDE_HUMAN  | 177 kDa | 0 | 1 | 1 | 0 |

|                                                                                                         |              |         |   |   |   |   |
|---------------------------------------------------------------------------------------------------------|--------------|---------|---|---|---|---|
| 116 kDa U5 small nuclear ribonucleoprotein component OS=Homo sapiens GN=EFTUD2 PE=1 SV=1                | U5S1_HUMAN   | 109 kDa | 0 | 0 | 2 | 1 |
| Zinc finger and SCAN domain-containing protein 2 OS=Homo sapiens GN=ZSCAN2 PE=2 SV=2                    | ZSCA2_HUMAN  | 70 kDa  | 0 | 1 | 0 | 1 |
| Guanine nucleotide-binding protein subunit beta-2-like 1 OS=Homo sapiens GN=GNB2L1 PE=1 SV=3            | GBLP_HUMAN   | 35 kDa  | 0 | 1 | 1 | 0 |
| AP-2 complex subunit beta OS=Homo sapiens GN=AP2B1 PE=1 SV=1                                            | AP2B1_HUMAN  | 105 kDa | 0 | 1 | 0 | 1 |
| Uridine diphosphate glucose pyrophosphatase OS=Homo sapiens GN=NUDT14 PE=1 SV=2                         | NUD14_HUMAN  | 24 kDa  | 0 | 1 | 0 | 1 |
| BTB/POZ domain-containing protein KCTD20 OS=Homo sapiens GN=KCTD20 PE=1 SV=1                            | KCD20_HUMAN  | 47 kDa  | 0 | 0 | 1 | 1 |
| Protein bicaudal D homolog 1 OS=Homo sapiens GN=BICD1 PE=1 SV=3                                         | BICD1_HUMAN  | 111 kDa | 0 | 0 | 1 | 0 |
| Inactive phospholipase C-like protein 1 OS=Homo sapiens GN=PLCL1 PE=1 SV=3                              | PLCL1_HUMAN  | 123 kDa | 0 | 0 | 1 | 0 |
| DnaJ homolog subfamily A member 1 OS=Homo sapiens GN=DNAJA1 PE=1 SV=2                                   | DNJA1_HUMAN  | 45 kDa  | 0 | 0 | 1 | 2 |
| T-complex protein 1 subunit epsilon OS=Homo sapiens GN=CCTS5 PE=1 SV=1                                  | TCPE_HUMAN   | 60 kDa  | 0 | 1 | 0 | 1 |
| Protein kinase C alpha type OS=Homo sapiens GN=PRKCA PE=1 SV=4                                          | KPCA_HUMAN   | 77 kDa  | 0 | 0 | 1 | 0 |
| Collagen alpha-1(XII) chain OS=Homo sapiens GN=COL22A1 PE=1 SV=2                                        | COMA1_HUMAN  | 161 kDa | 0 | 2 | 1 | 0 |
| Alpha-protein kinase 2 OS=Homo sapiens GN=ALPK2 PE=1 SV=3                                               | ALPK2_HUMAN  | 237 kDa | 0 | 0 | 0 | 1 |
| Ubiquitin carboxyl-terminal hydrolase 16 OS=Homo sapiens GN=USP16 PE=1 SV=1                             | UBP16_HUMAN  | 94 kDa  | 0 | 0 | 0 | 1 |
| Cadherin EGF LAG seven-pass G-type receptor 3 OS=Homo sapiens GN=CELSR3 PE=1 SV=2                       | CELR3_HUMAN  | 358 kDa | 0 | 0 | 1 | 1 |
| Voltage-dependent T-type calcium channel subunit alpha-1H OS=Homo sapiens GN=CACNA1H PE=1 SV=4          | CAC1H_HUMAN  | 259 kDa | 0 | 0 | 1 | 1 |
| A disintegrin and metalloproteinase with thrombospondin motifs 10 OS=Homo sapiens GN=ADAMTS10 PE=1 SV=1 | ATS10_HUMAN  | 121 kDa | 0 | 0 | 1 | 0 |
| A disintegrin and metalloproteinase with thrombospondin motifs 2 OS=Homo sapiens GN=ADAMTS2 PE=2 SV=1   | ATS2_HUMAN   | 135 kDa | 0 | 1 | 0 | 0 |
| Paternally-expressed gene 3 protein OS=Homo sapiens GN=PEG3 PE=2 SV=1                                   | PEG3_HUMAN   | 181 kDa | 0 | 0 | 1 | 0 |
| Ral guanine nucleotide dissociation stimulator-like 2 OS=Homo sapiens GN=RGL2 PE=1 SV=1                 | RGL2_HUMAN   | 84 kDa  | 0 | 1 | 0 | 0 |
| Putative protein FAM90A-like OS=Homo sapiens GN=FAM90A PE=3 SV=2                                        | F90AL_HUMAN  | 50 kDa  | 0 | 1 | 0 | 1 |
| Inactive rhomboid protein 1 OS=Homo sapiens GN=RHBDF1 PE=1 SV=2                                         | RHDF1_HUMAN  | 97 kDa  | 0 | 0 | 1 | 0 |
| Protein disulfide-isomerase OS=Homo sapiens GN=P4HB PE=1 SV=3                                           | PDIA1_HUMAN  | 57 kDa  | 0 | 0 | 1 | 1 |
| Zinc finger protein 423 OS=Homo sapiens GN=ZNF423 PE=1 SV=1                                             | ZN423_HUMAN  | 145 kDa | 0 | 1 | 1 | 0 |
| Eukaryotic translation initiation factor 3 subunit D OS=Homo sapiens GN=EIF3D PE=1 SV=1                 | EIF3D_HUMAN  | 64 kDa  | 0 | 0 | 1 | 0 |
| Complement component C6 OS=Homo sapiens GN=C6 PE=1 SV=3                                                 | CO6_HUMAN    | 105 kDa | 0 | 0 | 1 | 1 |
| Selenocysteine insertion sequence-binding protein 2 OS=Homo sapiens GN=SECISBP2 PE=1 SV=2               | SEBP2_HUMAN  | 95 kDa  | 0 | 1 | 0 | 0 |
| V(D)J recombination-activating protein 1 OS=Homo sapiens GN=RAG1 PE=1 SV=2                              | RAG1_HUMAN   | 119 kDa | 0 | 0 | 1 | 0 |
| Protein HIRA OS=Homo sapiens GN=HIRA PE=1 SV=2                                                          | HIRA_HUMAN   | 112 kDa | 0 | 0 | 2 | 1 |
| Probable D-lactate dehydrogenase, mitochondrial OS=Homo sapiens GN=LDHD PE=1 SV=1                       | LDHD_HUMAN   | 55 kDa  | 0 | 1 | 0 | 0 |
| Homer protein homolog 3 OS=Homo sapiens GN=HOMER3 PE=1 SV=2                                             | HOMER3_HUMAN | 40 kDa  | 0 | 0 | 1 | 0 |
| Unconventional myosin-IXb OS=Homo sapiens GN=MYO9B PE=1 SV=3                                            | MYO9B_HUMAN  | 243 kDa | 0 | 0 | 0 | 1 |
| Heterogeneous nuclear ribonucleoprotein L OS=Homo sapiens GN=HNRNPL PE=1 SV=2                           | HNRPL_HUMAN  | 64 kDa  | 0 | 1 | 0 | 1 |
| Zinc finger protein 45 OS=Homo sapiens GN=ZNF45 PE=2 SV=2                                               | ZNF45_HUMAN  | 78 kDa  | 0 | 1 | 1 | 0 |
| Dual specificity protein kinase TTK OS=Homo sapiens GN=TTK PE=1 SV=2                                    | TTK_HUMAN    | 97 kDa  | 0 | 1 | 1 | 0 |
| Mitochondrial carnitine/acylcarnitine carrier protein OS=Homo sapiens GN=SLC25A20 PE=1 SV=1             | MCAT_HUMAN   | 33 kDa  | 0 | 0 | 1 | 1 |
| Bone morphogenetic protein 6 OS=Homo sapiens GN=BMP6 PE=1 SV=1                                          | BMP6_HUMAN   | 57 kDa  | 0 | 0 | 1 | 1 |
| Calpain-15 OS=Homo sapiens GN=SOLH PE=1 SV=1                                                            | CAN15_HUMAN  | 117 kDa | 0 | 1 | 0 | 1 |
| Regulation of nuclear pre-mRNA domain-containing protein 2 OS=Homo sapiens GN=RPRED2 PE=1 SV=1          | RPRED2_HUMAN | 156 kDa | 0 | 1 | 0 | 0 |
| Aldehyde oxidase OS=Homo sapiens GN=AOX1 PE=2 SV=2                                                      | AOX1_HUMAN   | 148 kDa | 0 | 0 | 0 | 1 |
| Intersectin-1 OS=Homo sapiens GN=ITSN1 PE=1 SV=3                                                        | ITSN1_HUMAN  | 195 kDa | 0 | 0 | 0 | 1 |
| 60S ribosomal protein L10 OS=Homo sapiens GN=RPL10 PE=1 SV=4                                            | RL10_HUMAN   | 25 kDa  | 0 | 2 | 1 | 0 |
| Zinc finger SWIM domain-containing protein KIAA0913 OS=Homo sapiens GN=KIAA0913 PE=1 SV=1               | K0913_HUMAN  | 197 kDa | 0 | 1 | 1 | 0 |
| Nuclear pore complex protein Nup160 OS=Homo sapiens GN=NUP160 PE=1 SV=3                                 | NU160_HUMAN  | 162 kDa | 0 | 0 | 1 | 0 |
| DNA cross-link repair 1A protein OS=Homo sapiens GN=DCLRE1A PE=1 SV=3                                   | DCR1A_HUMAN  | 116 kDa | 0 | 1 | 1 | 0 |
| 26S proteasome non-ATPase regulatory subunit 2 OS=Homo sapiens GN=PSMD2 PE=1 SV=3                       | PSMD2_HUMAN  | 100 kDa | 0 | 0 | 1 | 2 |
| Sequestosome-1 OS=Homo sapiens GN=SQSTM1 PE=1 SV=1                                                      | SQSTM1_HUMAN | 48 kDa  | 0 | 0 | 1 | 1 |
| Pre-mRNA-processing-splicing factor 8 OS=Homo sapiens GN=PRPF8 PE=1 SV=2                                | PRPF8_HUMAN  | 274 kDa | 0 | 1 | 1 | 0 |
| Retrotransposon gag domain-containing protein 1 OS=Homo sapiens GN=RGAG1 PE=1 SV=1                      | RGAG1_HUMAN  | 144 kDa | 0 | 1 | 1 | 0 |
| Putative Segment polarity protein dishevelled homolog DVL-1-like OS=Homo sapiens GN=DVL1L1 PE=5 SV=1    | DVL1L1_HUMAN | 73 kDa  | 0 | 1 | 1 | 0 |
| Phosphoglycerate kinase 1 OS=Homo sapiens GN=PGK1 PE=1 SV=3                                             | PGK1_HUMAN   | 45 kDa  | 0 | 1 | 0 | 0 |
| Protein kinase C theta type OS=Homo sapiens GN=PRKQC PE=1 SV=3                                          | KPCT_HUMAN   | 82 kDa  | 0 | 0 | 0 | 1 |
| SH3 and multiple ankyrin repeat domains protein 2 OS=Homo sapiens GN=SHANK2 PE=1 SV=3                   | SHAN2_HUMAN  | 159 kDa | 0 | 0 | 1 | 0 |
| Neurofibromin OS=Homo sapiens GN=NF1 PE=1 SV=2                                                          | NF1_HUMAN    | 319 kDa | 0 | 0 | 2 | 1 |
| KDEL motif-containing protein 1 OS=Homo sapiens GN=KDEL1 PE=1 SV=1                                      | KDEL1_HUMAN  | 58 kDa  | 0 | 1 | 0 | 0 |
| CDK5 and ABL1 enzyme substrate 2 OS=Homo sapiens GN=CABLES2 PE=1 SV=3                                   | CABL2_HUMAN  | 52 kDa  | 0 | 0 | 0 | 1 |
| Zinc finger protein 425 OS=Homo sapiens GN=ZNF425 PE=2 SV=1                                             | ZN425_HUMAN  | 88 kDa  | 0 | 0 | 1 | 0 |
| Protein delta homolog 2 OS=Homo sapiens GN=DLK2 PE=2 SV=1                                               | DLK2_HUMAN   | 41 kDa  | 0 | 0 | 1 | 1 |
| Phosphatidylinositol 3-kinase catalytic subunit type 3 OS=Homo sapiens GN=PIK3C3 PE=1 SV=1              | PK3C3_HUMAN  | 102 kDa | 0 | 1 | 0 | 1 |
| Beta-klotho OS=Homo sapiens GN=KLB PE=1 SV=1                                                            | KLOTB_HUMAN  | 120 kDa | 0 | 1 | 0 | 0 |
| Scavenger receptor class A member 3 OS=Homo sapiens GN=SCARA3 PE=2 SV=1                                 | SCAR3_HUMAN  | 65 kDa  | 0 | 0 | 0 | 1 |
| Zinc finger protein 91 OS=Homo sapiens GN=ZNF91 PE=2 SV=2                                               | ZNF91_HUMAN  | 137 kDa | 0 | 1 | 0 | 0 |
| Myosin-binding protein C, cardiac-type OS=Homo sapiens GN=MYBPC3 PE=1 SV=3                              | MYPC3_HUMAN  | 141 kDa | 0 | 1 | 0 | 0 |
| Dynein heavy chain 6, axonemal OS=Homo sapiens GN=DNAH6 PE=1 SV=3                                       | DYH6_HUMAN   | 476 kDa | 0 | 0 | 0 | 1 |
| Structural maintenance of chromosomes protein 3 OS=Homo sapiens GN=SMC3 PE=1 SV=2                       | SMC3_HUMAN   | 142 kDa | 0 | 0 | 0 | 1 |
| Large subunit GTPase 1 homolog OS=Homo sapiens GN=LSG1 PE=1 SV=2                                        | LSG1_HUMAN   | 75 kDa  | 0 | 0 | 0 | 1 |
| Sal-like protein 4 OS=Homo sapiens GN=SALL4 PE=1 SV=1                                                   | SALL4_HUMAN  | 112 kDa | 0 | 0 | 0 | 1 |
| Intraflagellar transport protein 140 homolog OS=Homo sapiens GN=IFT140 PE=1 SV=1                        | IF140_HUMAN  | 165 kDa | 0 | 0 | 0 | 1 |
| DnaJ homolog subfamily C member 2 OS=Homo sapiens GN=DNAJC2 PE=1 SV=4                                   | DNJC2_HUMAN  | 72 kDa  | 0 | 0 | 1 | 0 |
| CREB3 regulatory factor OS=Homo sapiens GN=CREBRF PE=1 SV=2                                             | CRERF_HUMAN  | 72 kDa  | 0 | 0 | 0 | 1 |
| Thrombospondin-1 OS=Homo sapiens GN=THBS1 PE=1 SV=2                                                     | TSP1_HUMAN   | 129 kDa | 0 | 0 | 1 | 0 |
| Zinc finger CCHC domain-containing protein 13 OS=Homo sapiens GN=ZC3H13 PE=1 SV=1                       | ZC3HD_HUMAN  | 197 kDa | 0 | 1 | 1 | 0 |
| AT-hook-containing transcription factor OS=Homo sapiens GN=AKNA PE=1 SV=2                               | AKNA_HUMAN   | 155 kDa | 0 | 0 | 1 | 0 |
| Bromodomain and WD repeat-containing protein 3 OS=Homo sapiens GN=BRWD3 PE=1 SV=2                       | BRWD3_HUMAN  | 204 kDa | 0 | 0 | 0 | 1 |
| Bromodomain-containing protein 1 OS=Homo sapiens GN=BRD1 PE=1 SV=1                                      | BRD1_HUMAN   | 120 kDa | 0 | 0 | 0 | 1 |
| Zinc finger protein 618 OS=Homo sapiens GN=ZNF618 PE=1 SV=1                                             | ZN618_HUMAN  | 105 kDa | 0 | 0 | 0 | 1 |
| Golgin subfamily A member 6-like protein 2 OS=Homo sapiens GN=GOLGA6L2 PE=2 SV=2                        | GG6L2_HUMAN  | 79 kDa  | 0 | 0 | 1 | 0 |
| Ribonuclease 3 OS=Homo sapiens GN=DROSHA PE=1 SV=2                                                      | RNC_HUMAN    | 159 kDa | 0 | 0 | 1 | 0 |
| VW domain-binding protein 11 OS=Homo sapiens GN=WBP11 PE=1 SV=1                                         | WBP11_HUMAN  | 70 kDa  | 0 | 0 | 1 | 1 |
| Tectonin beta-propeller repeat-containing protein 2 OS=Homo sapiens GN=TECPR2 PE=1 SV=4                 | TCPR2_HUMAN  | 154 kDa | 0 | 0 | 0 | 1 |
| Proline-rich protein 14 OS=Homo sapiens GN=PRR14 PE=1 SV=1                                              | PRR14_HUMAN  | 64 kDa  | 0 | 0 | 1 | 0 |
| Receptor tyrosine-protein kinase erbB-2 OS=Homo sapiens GN=ERBB2 PE=1 SV=1                              | ERBB2_HUMAN  | 138 kDa | 0 | 1 | 0 | 0 |

|                                                                                                      |             |         |   |   |   |   |
|------------------------------------------------------------------------------------------------------|-------------|---------|---|---|---|---|
| Ankyrin-2 OS=Homo sapiens GN=ANK2 PE=1 SV=4                                                          | ANK2_HUMAN  | 434 kDa | 0 | 0 | 0 | 1 |
| E3 ubiquitin-protein ligase TRIM9 OS=Homo sapiens GN=TRIM9 PE=1 SV=1                                 | TRIM9_HUMAN | 79 kDa  | 0 | 1 | 0 | 0 |
| Dynamin-1-like protein OS=Homo sapiens GN=DNM1L PE=1 SV=2                                            | DNM1L_HUMAN | 82 kDa  | 0 | 0 | 1 | 0 |
| Rhotekin-2 OS=Homo sapiens GN=RTKN2 PE=2 SV=1                                                        | RTKN2_HUMAN | 69 kDa  | 0 | 1 | 0 | 0 |
| Probable ubiquitin carboxyl-terminal hydrolase FAF-X OS=Homo sapiens GN=USP9X PE=1 SV=3              | USP9X_HUMAN | 292 kDa | 0 | 1 | 0 | 0 |
| Keratin, type I cytoskeletal 19 OS=Homo sapiens GN=KRT19 PE=1 SV=4                                   | K1C19_HUMAN | 44 kDa  | 0 | 0 | 0 | 2 |
| Junction plakoglobin OS=Homo sapiens GN=JUP PE=1 SV=3                                                | PLAK_HUMAN  | 82 kDa  | 0 | 3 | 0 | 0 |
| Hermansky-Pudlak syndrome 3 protein OS=Homo sapiens GN=HPS3 PE=1 SV=1                                | HPS3_HUMAN  | 114 kDa | 0 | 0 | 0 | 3 |
| Mitochondrial tRNA-specific 2-thiouridylase 1 OS=Homo sapiens GN=TRMU PE=1 SV=2                      | MTU1_HUMAN  | 48 kDa  | 0 | 1 | 0 | 0 |
| Fibroblast growth factor receptor 4 OS=Homo sapiens GN=FGFR4 PE=1 SV=2                               | FGFR4_HUMAN | 88 kDa  | 0 | 0 | 1 | 0 |
| Adenylate cyclase type 10 OS=Homo sapiens GN=ADCY10 PE=1 SV=3                                        | ADCYA_HUMAN | 187 kDa | 0 | 0 | 1 | 0 |
| Dysferlin OS=Homo sapiens GN=DYSF PE=1 SV=1                                                          | DYSF_HUMAN  | 237 kDa | 0 | 1 | 0 | 0 |
| Serine/threonine-protein kinase D2 OS=Homo sapiens GN=PRKD2 PE=1 SV=2                                | KPCD2_HUMAN | 97 kDa  | 0 | 0 | 1 | 0 |
| Polycomb group RING finger protein 2 OS=Homo sapiens GN=PCGF2 PE=1 SV=1                              | PCGF2_HUMAN | 38 kDa  | 0 | 0 | 1 | 0 |
| Testis-specific Y-encoded-like protein 1 OS=Homo sapiens GN=TSPYL1 PE=1 SV=3                         | TSYL1_HUMAN | 49 kDa  | 0 | 0 | 1 | 0 |
| DNA replication licensing factor MCM6 OS=Homo sapiens GN=MCM6 PE=1 SV=1                              | MCM6_HUMAN  | 93 kDa  | 0 | 1 | 0 | 0 |
| Gamma-tubulin complex component 6 OS=Homo sapiens GN=TUBGCP6 PE=1 SV=3                               | GCP6_HUMAN  | 200 kDa | 0 | 1 | 0 | 0 |
| Zinc finger and BTB domain-containing protein 40 OS=Homo sapiens GN=ZBTB40 PE=1 SV=4                 | ZBT40_HUMAN | 138 kDa | 0 | 0 | 0 | 1 |
| Uncharacterized protein KIAA1210 OS=Homo sapiens GN=KIAA1210 PE=2 SV=3                               | K1210_HUMAN | 187 kDa | 0 | 0 | 0 | 1 |
| Calcium-dependent secretion activator 2 OS=Homo sapiens GN=CADPS2 PE=1 SV=2                          | CAPS2_HUMAN | 148 kDa | 0 | 0 | 0 | 1 |
| T-lymphoma invasion and metastasis-inducing protein 1 OS=Homo sapiens GN=TIAM1 PE=1 SV=2             | TIAM1_HUMAN | 178 kDa | 0 | 0 | 1 | 0 |
| Tumor suppressor p53-binding protein 1 OS=Homo sapiens GN=TP53BP1 PE=1 SV=2                          | TP53B_HUMAN | 214 kDa | 0 | 0 | 1 | 0 |
| Putative heat shock protein HSP 90-beta 2 OS=Homo sapiens GN=HSP90AB2P PE=1 SV=2                     | H90B2_HUMAN | 44 kDa  | 0 | 2 | 0 | 0 |
| Nuclear pore membrane glycoprotein 210-like OS=Homo sapiens GN=NUP210L PE=2 SV=1                     | P210L_HUMAN | 211 kDa | 0 | 0 | 0 | 1 |
| Proto-oncogene tyrosine-protein kinase ROS OS=Homo sapiens GN=ROS1 PE=1 SV=3                         | ROS1_HUMAN  | 264 kDa | 0 | 0 | 0 | 1 |
| Inactive polyglycylase TTL10 OS=Homo sapiens GN=TTL10 PE=1 SV=2                                      | TTL10_HUMAN | 75 kDa  | 0 | 0 | 0 | 1 |
| WD repeat and FYVE domain-containing protein 1 OS=Homo sapiens GN=WDFY1 PE=1 SV=1                    | WDFY1_HUMAN | 46 kDa  | 0 | 1 | 0 | 0 |
| Rho guanine nucleotide exchange factor 17 OS=Homo sapiens GN=ARHGEF17 PE=1 SV=1                      | ARHGH_HUMAN | 222 kDa | 0 | 0 | 1 | 0 |
| Cysteine-rich PAK1 inhibitor OS=Homo sapiens GN=CRIPAK PE=1 SV=1                                     | CRPAK_HUMAN | 48 kDa  | 0 | 0 | 1 | 0 |
| Voltage-dependent T-type calcium channel subunit alpha-1G OS=Homo sapiens GN=CACNA1G PE=2 SV=3       | CAC1G_HUMAN | 262 kDa | 0 | 0 | 0 | 1 |
| Calretinin OS=Homo sapiens GN=CALB2 PE=1 SV=2                                                        | CALB2_HUMAN | 32 kDa  | 0 | 0 | 1 | 0 |
| Kinesin-like protein KIF23 OS=Homo sapiens GN=KIF23 PE=1 SV=3                                        | KIF23_HUMAN | 110 kDa | 0 | 1 | 0 | 0 |
| Major vault protein OS=Homo sapiens GN=MVP PE=1 SV=4                                                 | MVP_HUMAN   | 99 kDa  | 0 | 0 | 3 | 0 |
| Pappalysin-2 OS=Homo sapiens GN=PAPPA2 PE=1 SV=4                                                     | PAPP2_HUMAN | 199 kDa | 0 | 1 | 0 | 0 |
| Centriolin OS=Homo sapiens GN=CNTRL PE=1 SV=2                                                        | CNTRL_HUMAN | 269 kDa | 0 | 0 | 1 | 0 |
| Poly(rC)-binding protein 1 OS=Homo sapiens GN=PCBP1 PE=1 SV=2                                        | PCBP1_HUMAN | 37 kDa  | 0 | 1 | 0 | 0 |
| Dihydropyridol dehydrogenase, mitochondrial OS=Homo sapiens GN=DLD PE=1 SV=2                         | DLDH_HUMAN  | 54 kDa  | 0 | 0 | 0 | 1 |
| ALK tyrosine kinase receptor OS=Homo sapiens GN=ALK PE=1 SV=3                                        | ALK_HUMAN   | 176 kDa | 0 | 1 | 0 | 0 |
| SPOC domain-containing protein 1 OS=Homo sapiens GN=SPOCD1 PE=2 SV=1                                 | SPOC1_HUMAN | 130 kDa | 0 | 0 | 0 | 1 |
| Uncharacterized protein C18orf34 OS=Homo sapiens GN=C18orf34 PE=1 SV=3                               | CR034_HUMAN | 102 kDa | 0 | 1 | 0 | 0 |
| Peroxisome proliferator-activated receptor gamma coactivator 1-beta OS=Homo sapiens GN=PPARGC1B P    | PRGC2_HUMAN | 113 kDa | 0 | 1 | 0 | 0 |
| FYVE, RhoGEF and PH domain-containing protein 6 OS=Homo sapiens GN=FGD6 PE=1 SV=2                    | FGD6_HUMAN  | 161 kDa | 0 | 0 | 1 | 0 |
| Zinc finger protein 850 OS=Homo sapiens GN=ZNF850 PE=3 SV=2                                          | ZN850_HUMAN | 125 kDa | 0 | 1 | 0 | 0 |
| Steroid 21-hydroxylase OS=Homo sapiens GN=CYP21A2 PE=1 SV=1                                          | CP21A_HUMAN | 56 kDa  | 0 | 0 | 1 | 0 |
| DNA polymerase subunit gamma-1 OS=Homo sapiens GN=POLG PE=1 SV=1                                     | DPOG1_HUMAN | 140 kDa | 0 | 0 | 1 | 0 |
| ATP-dependent RNA helicase DHX8 OS=Homo sapiens GN=DHX8 PE=1 SV=1                                    | DHX8_HUMAN  | 139 kDa | 0 | 0 | 2 | 0 |
| Potassium voltage-gated channel subfamily H member 3 OS=Homo sapiens GN=KCNH3 PE=2 SV=2              | KCNH3_HUMAN | 117 kDa | 0 | 0 | 1 | 0 |
| Proline/serine-rich coiled-coil protein 1 OS=Homo sapiens GN=PSRC1 PE=1 SV=1                         | PSRC1_HUMAN | 39 kDa  | 0 | 0 | 0 | 2 |
| Plexin-A2 OS=Homo sapiens GN=PLXNA2 PE=1 SV=4                                                        | PLXA2_HUMAN | 211 kDa | 0 | 1 | 0 | 0 |
| Methylcrotonoyl-CoA carboxylase subunit alpha, mitochondrial OS=Homo sapiens GN=MCCC1 PE=1 SV=3      | MCCA_HUMAN  | 80 kDa  | 0 | 1 | 0 | 0 |
| Basic helix-loop-helix domain-containing protein KIAA2018 OS=Homo sapiens GN=KIAA2018 PE=1 SV=3      | K2018_HUMAN | 242 kDa | 0 | 0 | 0 | 1 |
| Crumbs homolog 2 OS=Homo sapiens GN=CRB2 PE=1 SV=2                                                   | CRUM2_HUMAN | 134 kDa | 0 | 1 | 0 | 0 |
| Chondroitin sulfate synthase 3 OS=Homo sapiens GN=CHSY3 PE=1 SV=3                                    | CHSS3_HUMAN | 100 kDa | 0 | 0 | 0 | 1 |
| Inositol 1,4,5-trisphosphate receptor type 3 OS=Homo sapiens GN=ITPR3 PE=1 SV=2                      | ITPR3_HUMAN | 304 kDa | 0 | 0 | 1 | 0 |
| Collagen alpha-5(VI) chain OS=Homo sapiens GN=COL6A5 PE=1 SV=1                                       | CO6A5_HUMAN | 290 kDa | 0 | 1 | 0 | 0 |
| Kelch-like protein 38 OS=Homo sapiens GN=KLHL38 PE=2 SV=3                                            | KLH38_HUMAN | 66 kDa  | 0 | 1 | 0 | 0 |
| Zinc finger protein 197 OS=Homo sapiens GN=ZNF197 PE=2 SV=1                                          | ZN197_HUMAN | 119 kDa | 0 | 1 | 0 | 0 |
| Glucose-6-phosphate isomerase OS=Homo sapiens GN=GPI PE=1 SV=4                                       | G6PI_HUMAN  | 63 kDa  | 0 | 2 | 0 | 0 |
| Cholesterol 7-alpha-monooxygenase OS=Homo sapiens GN=CYP7A1 PE=1 SV=2                                | CP7A1_HUMAN | 58 kDa  | 0 | 0 | 0 | 1 |
| Serine/threonine-protein kinase BRSK1 OS=Homo sapiens GN=BRSK1 PE=1 SV=2                             | BRSK1_HUMAN | 85 kDa  | 0 | 0 | 0 | 1 |
| KN motif and ankyrin repeat domain-containing protein 1 OS=Homo sapiens GN=KANK1 PE=1 SV=3           | KANK1_HUMAN | 147 kDa | 0 | 1 | 0 | 0 |
| Centrosomal protein of 135 kDa OS=Homo sapiens GN=CEP135 PE=1 SV=2                                   | CP135_HUMAN | 133 kDa | 0 | 0 | 1 | 0 |
| Uncharacterized protein KIAA2026 OS=Homo sapiens GN=KIAA2026 PE=2 SV=2                               | K2026_HUMAN | 228 kDa | 0 | 1 | 0 | 0 |
| Phosphorylase b kinase regulatory subunit beta OS=Homo sapiens GN=PHKB PE=1 SV=3                     | KPBB_HUMAN  | 125 kDa | 0 | 0 | 1 | 0 |
| Adenosylhomocysteinase OS=Homo sapiens GN=AHCY PE=1 SV=4                                             | SAHH_HUMAN  | 48 kDa  | 0 | 0 | 0 | 1 |
| APC membrane recruitment protein 1 OS=Homo sapiens GN=FAM123B PE=1 SV=2                              | AMER1_HUMAN | 124 kDa | 0 | 0 | 1 | 0 |
| Complement C3 OS=Homo sapiens GN=C3 PE=1 SV=2                                                        | CO3_HUMAN   | 187 kDa | 0 | 1 | 0 | 0 |
| Zinc finger protein 534 OS=Homo sapiens GN=ZNF534 PE=2 SV=1                                          | ZN534_HUMAN | 77 kDa  | 0 | 1 | 0 | 0 |
| Breast cancer type 1 susceptibility protein OS=Homo sapiens GN=BRCA1 PE=1 SV=2                       | BRCA1_HUMAN | 208 kDa | 0 | 0 | 0 | 1 |
| Integrator complex subunit 10 OS=Homo sapiens GN=INTS10 PE=1 SV=2                                    | INT10_HUMAN | 82 kDa  | 0 | 0 | 1 | 0 |
| Cyclic nucleotide-gated cation channel beta-1 OS=Homo sapiens GN=CNGB1 PE=1 SV=2                     | CNGB1_HUMAN | 140 kDa | 0 | 0 | 1 | 0 |
| Ankyrin repeat domain-containing protein 62 OS=Homo sapiens GN=ANKRD62 PE=2 SV=4                     | ANR62_HUMAN | 106 kDa | 0 | 1 | 0 | 0 |
| Zinc finger protein 547 OS=Homo sapiens GN=ZNF547 PE=2 SV=2                                          | ZN547_HUMAN | 46 kDa  | 0 | 0 | 1 | 0 |
| Cytoplasmic FMR1-interacting protein 1 OS=Homo sapiens GN=CYFIP1 PE=1 SV=1                           | CYFP1_HUMAN | 145 kDa | 0 | 0 | 0 | 1 |
| Probable E3 ubiquitin-protein ligase makorin-3 OS=Homo sapiens GN=MKRN3 PE=1 SV=1                    | MKRN3_HUMAN | 56 kDa  | 0 | 0 | 1 | 0 |
| U4/U6 small nuclear ribonucleoprotein Prp4 OS=Homo sapiens GN=PRPF4 PE=1 SV=2                        | PRP4_HUMAN  | 58 kDa  | 0 | 0 | 1 | 0 |
| Sarcoplasmic/endoplasmic reticulum calcium ATPase 3 OS=Homo sapiens GN=ATP2A3 PE=1 SV=2              | AT2A3_HUMAN | 114 kDa | 0 | 0 | 1 | 0 |
| A disintegrin and metalloproteinase with thrombospondin motifs 15 OS=Homo sapiens GN=ADAMTS15 PE     | ATS15_HUMAN | 103 kDa | 0 | 0 | 0 | 1 |
| Contactin-4 OS=Homo sapiens GN=CNTN4 PE=1 SV=1                                                       | CNTN4_HUMAN | 113 kDa | 0 | 0 | 0 | 1 |
| Fibroblast growth factor receptor 1 OS=Homo sapiens GN=FGFR1 PE=1 SV=3                               | FGFR1_HUMAN | 92 kDa  | 0 | 0 | 0 | 1 |
| Immunoglobulin-like and fibronectin type III domain-containing protein 1 OS=Homo sapiens GN=IGFN1 PE | IGFN1_HUMAN | 138 kDa | 0 | 0 | 0 | 1 |
| Inhibitor of nuclear factor kappa-B kinase subunit alpha OS=Homo sapiens GN=CHUK PE=1 SV=2           | IKKA_HUMAN  | 85 kDa  | 0 | 0 | 0 | 1 |

|                                                                                                       |              |         |   |   |   |   |
|-------------------------------------------------------------------------------------------------------|--------------|---------|---|---|---|---|
| Protein jagged-1 OS=Homo sapiens GN=JAG1 PE=1 SV=3                                                    | JAG1_HUMAN   | 134 kDa | 0 | 0 | 0 | 1 |
| Keratin-associated protein 5-9 OS=Homo sapiens GN=KRTAP5-9 PE=2 SV=1                                  | KRA59_HUMAN  | 16 kDa  | 0 | 0 | 0 | 1 |
| Mdm2-binding protein OS=Homo sapiens GN=MTBP PE=1 SV=1                                                | MTBP_HUMAN   | 102 kDa | 0 | 0 | 0 | 1 |
| Nibrin OS=Homo sapiens GN=NBPN PE=1 SV=1                                                              | NBN_HUMAN    | 85 kDa  | 0 | 0 | 0 | 1 |
| Semaphorin-3B OS=Homo sapiens GN=SEMA3B PE=2 SV=1                                                     | SEM3B_HUMAN  | 83 kDa  | 0 | 0 | 0 | 1 |
| Coiled-coil domain-containing protein 77 OS=Homo sapiens GN=CCDC77 PE=2 SV=1                          | CCD77_HUMAN  | 57 kDa  | 0 | 1 | 0 | 0 |
| Caseinolytic peptidase B protein homolog OS=Homo sapiens GN=CLPB PE=1 SV=1                            | CLPB_HUMAN   | 79 kDa  | 0 | 1 | 0 | 0 |
| Syntaxin-binding protein 5-like OS=Homo sapiens GN=STXBP5L PE=2 SV=2                                  | STB5L_HUMAN  | 132 kDa | 0 | 1 | 0 | 0 |
| SUN domain-containing protein 5 OS=Homo sapiens GN=SUN5 PE=2 SV=1                                     | SUN5_HUMAN   | 43 kDa  | 0 | 1 | 0 | 0 |
| Probable ATP-dependent RNA helicase DDX20 OS=Homo sapiens GN=DDX20 PE=1 SV=2                          | DDX20_HUMAN  | 92 kDa  | 0 | 0 | 1 | 0 |
| MAP kinase-activated protein kinase 3 OS=Homo sapiens GN=MAPKAPK3 PE=1 SV=1                           | MAPK3_HUMAN  | 43 kDa  | 0 | 0 | 1 | 0 |
| Guanine nucleotide exchange factor DBS OS=Homo sapiens GN=MCF2L PE=1 SV=2                             | MCF2L_HUMAN  | 128 kDa | 0 | 0 | 1 | 0 |
| N-alpha-acetyltransferase 35, NatC auxiliary subunit OS=Homo sapiens GN=NAA35 PE=1 SV=1               | NAA35_HUMAN  | 84 kDa  | 0 | 0 | 1 | 0 |
| Neurobeachin-like protein 2 OS=Homo sapiens GN=NBEAL2 PE=1 SV=2                                       | NBEL2_HUMAN  | 303 kDa | 0 | 0 | 1 | 0 |
| Patched domain-containing protein 2 OS=Homo sapiens GN=PTCHD2 PE=2 SV=2                               | PTHD2_HUMAN  | 153 kDa | 0 | 0 | 1 | 0 |
| Striated muscle preferentially expressed protein kinase OS=Homo sapiens GN=SPEG PE=1 SV=4             | SPEG_HUMAN   | 354 kDa | 0 | 0 | 1 | 0 |
| Ubiquitin-like modifier-activating enzyme 1 OS=Homo sapiens GN=UBA1 PE=1 SV=3                         | UBA1_HUMAN   | 118 kDa | 0 | 0 | 1 | 0 |
| Calpain-11 OS=Homo sapiens GN=CAPN11 PE=1 SV=2                                                        | CAN11_HUMAN  | 84 kDa  | 0 | 0 | 0 | 1 |
| Septin-9 OS=Homo sapiens GN=SEPT9 PE=1 SV=2                                                           | SEPT9_HUMAN  | 65 kDa  | 0 | 1 | 0 | 0 |
| Regulator of nonsense transcripts 2 OS=Homo sapiens GN=UPF2 PE=1 SV=1                                 | RENT2_HUMAN  | 148 kDa | 0 | 0 | 0 | 1 |
| F-box only protein 38 OS=Homo sapiens GN=FBXO38 PE=1 SV=3                                             | FBX38_HUMAN  | 134 kDa | 0 | 0 | 1 | 0 |
| Transcription factor COE4 OS=Homo sapiens GN=EBF4 PE=2 SV=2                                           | COE4_HUMAN   | 64 kDa  | 0 | 0 | 0 | 1 |
| Histone-lysine N-methyltransferase ASH1L OS=Homo sapiens GN=ASH1L PE=1 SV=2                           | ASH1L_HUMAN  | 333 kDa | 0 | 0 | 1 | 0 |
| Muscleblind-like protein 3 OS=Homo sapiens GN=MBNL3 PE=2 SV=2                                         | MBNL3_HUMAN  | 39 kDa  | 0 | 0 | 1 | 0 |
| tRNA (guanine(26)-N(2))-dimethyltransferase OS=Homo sapiens GN=TRMT1 PE=1 SV=1                        | TRM1_HUMAN   | 72 kDa  | 0 | 0 | 1 | 0 |
| Nuclear pore complex protein Nup85 OS=Homo sapiens GN=NUP85 PE=1 SV=1                                 | NUP85_HUMAN  | 75 kDa  | 0 | 0 | 0 | 1 |
| Otogelin-like protein OS=Homo sapiens GN=OTOG1 PE=2 SV=4                                              | OTOG1_HUMAN  | 81 kDa  | 0 | 0 | 0 | 1 |
| Protein PRR14L OS=Homo sapiens GN=PRR14L PE=1 SV=1                                                    | PR14L_HUMAN  | 237 kDa | 0 | 0 | 1 | 0 |
| Cutaneous T-cell lymphoma-associated antigen 5 OS=Homo sapiens GN=CTAGE5 PE=1 SV=4                    | CTGE5_HUMAN  | 91 kDa  | 0 | 0 | 0 | 1 |
| Ninein-like protein OS=Homo sapiens GN=NINL PE=1 SV=2                                                 | NINL_HUMAN   | 156 kDa | 0 | 0 | 1 | 0 |
| Zinc finger protein 276 OS=Homo sapiens GN=ZNF276 PE=1 SV=4                                           | ZN276_HUMAN  | 67 kDa  | 0 | 1 | 0 | 0 |
| Serine/threonine-protein kinase PRP4 homolog OS=Homo sapiens GN=PRPF4B PE=1 SV=3                      | PRP4B_HUMAN  | 117 kDa | 0 | 0 | 1 | 0 |
| Myosin-binding protein C, fast-type OS=Homo sapiens GN=MYBPC2 PE=1 SV=2                               | MYP2C_HUMAN  | 128 kDa | 0 | 0 | 0 | 1 |
| Phosphoribosylformylglycinamide synthase OS=Homo sapiens GN=PFAS PE=1 SV=4                            | PUR4_HUMAN   | 145 kDa | 0 | 0 | 0 | 1 |
| Zinc finger protein 624 OS=Homo sapiens GN=ZNF624 PE=2 SV=3                                           | ZN624_HUMAN  | 100 kDa | 0 | 1 | 0 | 0 |
| Serine palmitoyltransferase 3 OS=Homo sapiens GN=SPTLC3 PE=1 SV=3                                     | SPTC3_HUMAN  | 62 kDa  | 0 | 0 | 0 | 1 |
| Deubiquitinating protein VCIPI35 OS=Homo sapiens GN=VCIPI1 PE=1 SV=2                                  | VCIPI1_HUMAN | 134 kDa | 0 | 1 | 0 | 0 |
| Lymphocyte antigen 6 complex locus protein G5c OS=Homo sapiens GN=LY6G5C PE=1 SV=1                    | LY65C_HUMAN  | 17 kDa  | 0 | 0 | 0 | 1 |
| Protein kinase C and casein kinase substrate in neurons protein 2 OS=Homo sapiens GN=PACIN2 PE=1 SV=1 | PACN2_HUMAN  | 56 kDa  | 0 | 0 | 1 | 0 |
| HEAT repeat-containing protein 4 OS=Homo sapiens GN=HEATR4 PE=1 SV=2                                  | HEAT4_HUMAN  | 117 kDa | 0 | 1 | 0 | 0 |
| Huntingtin-interacting protein 1-related protein OS=Homo sapiens GN=HIP1R PE=1 SV=2                   | HIP1R_HUMAN  | 119 kDa | 0 | 0 | 1 | 0 |
| Uncharacterized protein C10orf118 OS=Homo sapiens GN=C10orf118 PE=2 SV=2                              | CJ118_HUMAN  | 104 kDa | 0 | 1 | 0 | 0 |
| Protein turtle homolog B OS=Homo sapiens GN=IGSF9B PE=2 SV=2                                          | TUTLB_HUMAN  | 147 kDa | 0 | 1 | 0 | 0 |
| Histone H1.2 OS=Homo sapiens GN=HIST1H1C PE=1 SV=2                                                    | H12_HUMAN    | 21 kDa  | 0 | 1 | 1 | 1 |
| Tubulin beta-4B chain OS=Homo sapiens GN=TUBB4B PE=1 SV=1                                             | TBB4B_HUMAN  | 50 kDa  | 0 | 1 | 0 | 1 |
| Guanine nucleotide-binding protein G(i)/G(s)/G(t) subunit beta-2 OS=Homo sapiens GN=GNB2 PE=1 SV=3    | GBB2_HUMAN   | 37 kDa  | 0 | 1 | 1 | 0 |
| Septin-10 OS=Homo sapiens GN=SEPT10 PE=1 SV=2                                                         | SEP10_HUMAN  | 53 kDa  | 0 | 1 | 1 | 1 |
| Kinesin-like protein KIF3B OS=Homo sapiens GN=KIF3B PE=1 SV=1                                         | KIF3B_HUMAN  | 85 kDa  | 0 | 0 | 1 | 1 |
| Peroxiredoxin-1 OS=Homo sapiens GN=PRDX1 PE=1 SV=1                                                    | PRDX1_HUMAN  | 22 kDa  | 0 | 1 | 1 | 0 |
| Long-chain-fatty-acid--CoA ligase 3 OS=Homo sapiens GN=ACSL3 PE=1 SV=3                                | ACSL3_HUMAN  | 80 kDa  | 0 | 0 | 1 | 1 |
| 26S protease regulatory subunit 6A OS=Homo sapiens GN=PSMC3 PE=1 SV=3                                 | PRS6A_HUMAN  | 49 kDa  | 0 | 0 | 1 | 1 |
| SLIT-ROBO Rho GTPase-activating protein 2 OS=Homo sapiens GN=SRGAP2 PE=1 SV=2                         | FNBP2_HUMAN  | 121 kDa | 0 | 0 | 1 | 1 |
| Methyl-CpG-binding domain protein 1 OS=Homo sapiens GN=MBD1 PE=1 SV=2                                 | MBD1_HUMAN   | 67 kDa  | 0 | 0 | 1 | 0 |
| Unhealthy ribosome biogenesis protein 2 homolog OS=Homo sapiens GN=URB2 PE=1 SV=2                     | URB2_HUMAN   | 171 kDa | 0 | 0 | 0 | 1 |
| Latent-transforming growth factor beta-binding protein 3 OS=Homo sapiens GN=LTBP3 PE=1 SV=4           | LTBP3_HUMAN  | 139 kDa | 0 | 0 | 1 | 1 |
| Vacuolar protein sorting-associated protein 26B OS=Homo sapiens GN=VPS26B PE=1 SV=2                   | VP26B_HUMAN  | 39 kDa  | 0 | 0 | 1 | 0 |
| Polycystic kidney disease protein 1-like 3 OS=Homo sapiens GN=PKD1L3 PE=2 SV=1                        | PK1L3_HUMAN  | 196 kDa | 0 | 1 | 1 | 0 |
| E3 ubiquitin-protein ligase E3D OS=Homo sapiens GN=UBE3D PE=1 SV=2                                    | UBE3D_HUMAN  | 44 kDa  | 0 | 0 | 1 | 0 |
| Protein FAM75E1 OS=Homo sapiens GN=FAM75E1 PE=2 SV=2                                                  | F75E1_HUMAN  | 157 kDa | 0 | 1 | 0 | 1 |
| Dual specificity protein phosphatase CDC14B OS=Homo sapiens GN=CDC14B PE=1 SV=1                       | CC14B_HUMAN  | 57 kDa  | 0 | 1 | 0 | 1 |
| Aldo-keto reductase family 1 member B15 OS=Homo sapiens GN=AKR1B15 PE=2 SV=1                          | AK1BF_HUMAN  | 39 kDa  | 0 | 1 | 0 | 1 |
| Zinc finger protein 208 OS=Homo sapiens GN=ZNF208 PE=2 SV=1                                           | ZN208_HUMAN  | 134 kDa | 0 | 0 | 0 | 1 |
| Plastin-3 OS=Homo sapiens GN=PLS3 PE=1 SV=4                                                           | PLST_HUMAN   | 71 kDa  | 0 | 0 | 1 | 0 |
| Coiled-coil domain-containing protein 87 OS=Homo sapiens GN=CCDC87 PE=2 SV=2                          | CCD87_HUMAN  | 96 kDa  | 0 | 0 | 1 | 0 |
| F-box only protein 43 OS=Homo sapiens GN=FBXO43 PE=1 SV=3                                             | FBX43_HUMAN  | 78 kDa  | 0 | 0 | 0 | 1 |
| Large neutral amino acids transporter small subunit 1 OS=Homo sapiens GN=SLC7A5 PE=1 SV=2             | LAT1_HUMAN   | 55 kDa  | 0 | 2 | 0 | 1 |
| Armadillo repeat-containing X-linked protein 5 OS=Homo sapiens GN=ARMX5 PE=2 SV=1                     | ARMX5_HUMAN  | 62 kDa  | 0 | 2 | 0 | 1 |
| Tubulin beta chain OS=Homo sapiens GN=TUBB PE=1 SV=2                                                  | TBB5_HUMAN   | 50 kDa  | 0 | 1 | 2 | 0 |
| 40S ribosomal protein S13 OS=Homo sapiens GN=RPS13 PE=1 SV=2                                          | RS13_HUMAN   | 17 kDa  | 0 | 1 | 2 | 0 |
| Delta(3,5)-Delta(2,4)-dienoyl-CoA isomerase, mitochondrial OS=Homo sapiens GN=ECH1 PE=1 SV=2          | ECH1_HUMAN   | 36 kDa  | 0 | 2 | 1 | 0 |
| T-complex protein 1 subunit delta OS=Homo sapiens GN=CCT4 PE=1 SV=4                                   | TCPD_HUMAN   | 58 kDa  | 0 | 1 | 1 | 0 |
| Malate dehydrogenase, mitochondrial OS=Homo sapiens GN=MDH2 PE=1 SV=3                                 | MDHM_HUMAN   | 36 kDa  | 0 | 1 | 0 | 1 |
| Clusterin OS=Homo sapiens GN=CLU PE=1 SV=1                                                            | CLUS_HUMAN   | 52 kDa  | 0 | 1 | 1 | 0 |
| GTP-binding nuclear protein Ran OS=Homo sapiens GN=RAN PE=1 SV=3                                      | RAN_HUMAN    | 24 kDa  | 0 | 1 | 0 | 1 |
| Plexin domain-containing protein 2 OS=Homo sapiens GN=PLXDC2 PE=1 SV=1                                | PXDC2_HUMAN  | 60 kDa  | 0 | 0 | 0 | 1 |
| Ataxin-7-like protein 2 OS=Homo sapiens GN=ATXN7L2 PE=2 SV=1                                          | AT7L2_HUMAN  | 77 kDa  | 0 | 1 | 1 | 0 |
| Uncharacterized protein KIAA1586 OS=Homo sapiens GN=KIAA1586 PE=2 SV=2                                | K1586_HUMAN  | 90 kDa  | 0 | 1 | 0 | 1 |
| 60S ribosomal protein L13a OS=Homo sapiens GN=RPL13A PE=1 SV=2                                        | RL13A_HUMAN  | 24 kDa  | 0 | 2 | 1 | 0 |
| Trinucleotide repeat-containing gene 6B protein OS=Homo sapiens GN=TNRC6B PE=1 SV=4                   | TNR6B_HUMAN  | 194 kDa | 0 | 1 | 0 | 1 |
| Uncharacterized protein C5orf42 OS=Homo sapiens GN=C5orf42 PE=2 SV=3                                  | CE042_HUMAN  | 236 kDa | 0 | 0 | 1 | 1 |
| T-complex protein 1 subunit theta OS=Homo sapiens GN=CCT8 PE=1 SV=4                                   | TCPQ_HUMAN   | 60 kDa  | 0 | 2 | 0 | 1 |
| SET and MYND domain-containing protein 4 OS=Homo sapiens GN=SMYD4 PE=2 SV=3                           | SMYD4_HUMAN  | 89 kDa  | 0 | 1 | 0 | 0 |

|                                                                                                             |              |         |   |   |   |   |
|-------------------------------------------------------------------------------------------------------------|--------------|---------|---|---|---|---|
| Potassium/sodium hyperpolarization-activated cyclic nucleotide-gated channel 4 OS=Homo sapiens GN=H         | HCN4_HUMAN   | 129 kDa | 0 | 0 | 1 | 1 |
| Endothelial cell-specific molecule 1 OS=Homo sapiens GN=ESM1 PE=1 SV=2                                      | ESM1_HUMAN   | 20 kDa  | 0 | 1 | 0 | 0 |
| Putative endoplasmic-like protein OS=Homo sapiens GN=HSP90B2P PE=5 SV=1                                     | ENPL1_HUMAN  | 46 kDa  | 0 | 0 | 1 | 1 |
| Protocadherin-8 OS=Homo sapiens GN=PCDH8 PE=2 SV=2                                                          | PCDH8_HUMAN  | 113 kDa | 0 | 0 | 1 | 1 |
| Heterogeneous nuclear ribonucleoprotein A3 OS=Homo sapiens GN=HNRNPA3 PE=1 SV=2                             | ROA3_HUMAN   | 40 kDa  | 0 | 1 | 0 | 1 |
| Synaptonemal complex protein 1 OS=Homo sapiens GN=SYCP1 PE=1 SV=2                                           | SYCP1_HUMAN  | 114 kDa | 0 | 1 | 0 | 1 |
| Fc receptor-like B OS=Homo sapiens GN=FCRLB PE=1 SV=1                                                       | FCRLB_HUMAN  | 47 kDa  | 0 | 0 | 1 | 1 |
| Zinc finger and SCAN domain-containing protein 5A OS=Homo sapiens GN=ZSCAN5A PE=2 SV=1                      | ZSA5A_HUMAN  | 56 kDa  | 0 | 1 | 0 | 1 |
| SHC SH2 domain-binding protein 1 OS=Homo sapiens GN=SHCBP1 PE=1 SV=3                                        | SHCBP_HUMAN  | 76 kDa  | 0 | 0 | 1 | 0 |
| Charged multivesicular body protein 3 OS=Homo sapiens GN=CHMP3 PE=1 SV=3                                    | CHMP3_HUMAN  | 25 kDa  | 0 | 0 | 1 | 1 |
| Transcription factor Sp5 OS=Homo sapiens GN=SP5 PE=2 SV=1                                                   | SP5_HUMAN    | 42 kDa  | 0 | 1 | 1 | 0 |
| Receptor-type tyrosine-protein phosphatase beta OS=Homo sapiens GN=PTPRB PE=1 SV=3                          | PTPRB_HUMAN  | 224 kDa | 0 | 1 | 1 | 0 |
| Lysosomal-trafficking regulator OS=Homo sapiens GN=LYST PE=1 SV=3                                           | LYST_HUMAN   | 429 kDa | 0 | 0 | 1 | 0 |
| Cadherin-23 OS=Homo sapiens GN=CDH23 PE=1 SV=1                                                              | CAD23_HUMAN  | 370 kDa | 0 | 1 | 1 | 0 |
| Protein NOXP20 OS=Homo sapiens GN=FAM114A1 PE=1 SV=2                                                        | NXP20_HUMAN  | 61 kDa  | 0 | 1 | 0 | 1 |
| Aspartate aminotransferase, mitochondrial OS=Homo sapiens GN=GOT2 PE=1 SV=3                                 | AATM_HUMAN   | 48 kDa  | 0 | 1 | 0 | 0 |
| Ral GTPase-activating protein subunit alpha-2 OS=Homo sapiens GN=RALGAP2 PE=1 SV=2                          | RGPA2_HUMAN  | 211 kDa | 0 | 0 | 1 | 1 |
| Prospero homeobox protein 2 OS=Homo sapiens GN=PROX2 PE=2 SV=3                                              | PROX2_HUMAN  | 66 kDa  | 0 | 1 | 0 | 0 |
| Bifunctional polynucleotide phosphatase/kinase OS=Homo sapiens GN=PNKP PE=1 SV=1                            | PNKP_HUMAN   | 57 kDa  | 0 | 1 | 1 | 0 |
| WASH complex subunit 7 OS=Homo sapiens GN=KIAA1033 PE=1 SV=2                                                | WASH7_HUMAN  | 136 kDa | 0 | 0 | 0 | 1 |
| Lymphocyte antigen 96 OS=Homo sapiens GN=LY96 PE=1 SV=2                                                     | LY96_HUMAN   | 19 kDa  | 0 | 1 | 1 | 0 |
| Synaptojanin-2 OS=Homo sapiens GN=SYNJ2 PE=1 SV=3                                                           | SYNJ2_HUMAN  | 166 kDa | 0 | 1 | 0 | 0 |
| G-protein coupled receptor family C group 5 member C OS=Homo sapiens GN=GPRC5C PE=1 SV=2                    | GPC5C_HUMAN  | 48 kDa  | 0 | 0 | 1 | 0 |
| Piwi-like protein 2 OS=Homo sapiens GN=PIWIL2 PE=1 SV=1                                                     | PIWIL2_HUMAN | 110 kDa | 0 | 0 | 1 | 0 |
| Zinc finger and BTB domain-containing protein 34 OS=Homo sapiens GN=ZBTB34 PE=2 SV=4                        | ZBT34_HUMAN  | 56 kDa  | 0 | 0 | 1 | 0 |
| Collagen alpha-2(VIII) chain OS=Homo sapiens GN=COL8A2 PE=1 SV=2                                            | CO8A2_HUMAN  | 67 kDa  | 0 | 0 | 1 | 0 |
| Pleckstrin homology domain-containing family G member 6 OS=Homo sapiens GN=PLEKHG6 PE=1 SV=3                | PKHG6_HUMAN  | 89 kDa  | 0 | 1 | 0 | 0 |
| Neurexin-2-alpha OS=Homo sapiens GN=NRXN2 PE=2 SV=1                                                         | NRX2A_HUMAN  | 185 kDa | 0 | 1 | 0 | 0 |
| CCR4-NOT transcription complex subunit 10 OS=Homo sapiens GN=CNOT10 PE=1 SV=1                               | CNOTA_HUMAN  | 82 kDa  | 0 | 0 | 1 | 0 |
| Insulin receptor substrate 4 OS=Homo sapiens GN=IRS4 PE=1 SV=1                                              | IRS4_HUMAN   | 134 kDa | 0 | 0 | 1 | 0 |
| Remodeling and spacing factor 1 OS=Homo sapiens GN=RSF1 PE=1 SV=2                                           | RSF1_HUMAN   | 164 kDa | 0 | 0 | 1 | 0 |
| Structural maintenance of chromosomes protein 4 OS=Homo sapiens GN=SMC4 PE=1 SV=2                           | SMC4_HUMAN   | 147 kDa | 0 | 1 | 1 | 0 |
| Zinc finger protein 282 OS=Homo sapiens GN=ZNF282 PE=1 SV=3                                                 | ZN282_HUMAN  | 74 kDa  | 0 | 1 | 0 | 0 |
| MORC family CW-type zinc finger protein 2 OS=Homo sapiens GN=MORC2 PE=1 SV=2                                | MORC2_HUMAN  | 118 kDa | 0 | 1 | 0 | 0 |
| DNA-directed RNA polymerase III subunit RPC1 OS=Homo sapiens GN=POLR3A PE=1 SV=2                            | RPC1_HUMAN   | 156 kDa | 0 | 0 | 1 | 0 |
| M-phase inducer phosphatase 1 OS=Homo sapiens GN=CDC25A PE=1 SV=2                                           | MP1P1_HUMAN  | 59 kDa  | 0 | 0 | 0 | 1 |
| Dihydropyrimidinase OS=Homo sapiens GN=DPYS PE=1 SV=1                                                       | DPYS_HUMAN   | 57 kDa  | 0 | 1 | 0 | 0 |
| Calcium-activated potassium channel subunit beta-3 OS=Homo sapiens GN=KCNMB3 PE=1 SV=2                      | KCMB3_HUMAN  | 32 kDa  | 0 | 1 | 0 | 0 |
| Small RNA 2'-O-methyltransferase OS=Homo sapiens GN=HENMT1 PE=2 SV=1                                        | HENMT_HUMAN  | 45 kDa  | 0 | 0 | 0 | 1 |
| Complement C1r subcomponent-like protein OS=Homo sapiens GN=C1RL PE=1 SV=2                                  | C1RL_HUMAN   | 53 kDa  | 0 | 0 | 0 | 1 |
| Actin-like protein 6A OS=Homo sapiens GN=ACTL6A PE=1 SV=1                                                   | ACL6A_HUMAN  | 47 kDa  | 0 | 1 | 0 | 0 |
| Interferon-induced protein with tetratricopeptide repeats 1 OS=Homo sapiens GN=IFIT1 PE=1 SV=2              | IFIT1_HUMAN  | 55 kDa  | 0 | 0 | 0 | 1 |
| Plasminogen activator inhibitor 1 RNA-binding protein OS=Homo sapiens GN=SERBP1 PE=1 SV=2                   | PAIRB_HUMAN  | 45 kDa  | 0 | 0 | 0 | 1 |
| Kinesin-like protein KIF3C OS=Homo sapiens GN=KIF3C PE=1 SV=3                                               | KIF3C_HUMAN  | 89 kDa  | 0 | 0 | 0 | 1 |
| Sorting nexin-31 OS=Homo sapiens GN=SNX31 PE=2 SV=3                                                         | SNX31_HUMAN  | 51 kDa  | 0 | 0 | 1 | 0 |
| Protocadherin gamma-A5 OS=Homo sapiens GN=PCDHGA5 PE=2 SV=1                                                 | PCDG5_HUMAN  | 101 kDa | 0 | 0 | 0 | 1 |
| Voltage-dependent T-type calcium channel subunit alpha-1I OS=Homo sapiens GN=CACNA1I PE=1 SV=1              | CAC1I_HUMAN  | 245 kDa | 0 | 0 | 1 | 0 |
| Zinc finger protein 12 OS=Homo sapiens GN=ZNF12 PE=2 SV=3                                                   | ZNF12_HUMAN  | 81 kDa  | 0 | 1 | 0 | 0 |
| FAST kinase domain-containing protein 3 OS=Homo sapiens GN=FASTKD3 PE=2 SV=2                                | FAKD3_HUMAN  | 76 kDa  | 0 | 0 | 0 | 1 |
| Phospholipase DDHD1 OS=Homo sapiens GN=DDHD1 PE=2 SV=2                                                      | DDHD1_HUMAN  | 100 kDa | 0 | 0 | 0 | 1 |
| E3 ubiquitin-protein ligase RNF14 OS=Homo sapiens GN=RNF14 PE=1 SV=1                                        | RNF14_HUMAN  | 54 kDa  | 0 | 1 | 0 | 0 |
| Tubulin beta-6 chain OS=Homo sapiens GN=TUBB6 PE=1 SV=1                                                     | TBB6_HUMAN   | 50 kDa  | 0 | 0 | 1 | 0 |
| Transmembrane protein 194A OS=Homo sapiens GN=TMEM194A PE=1 SV=2                                            | T194A_HUMAN  | 51 kDa  | 0 | 1 | 0 | 0 |
| Thyroid adenoma-associated protein OS=Homo sapiens GN=THADA PE=1 SV=1                                       | THADA_HUMAN  | 220 kDa | 0 | 0 | 1 | 0 |
| E3 ubiquitin-protein ligase SMURF1 OS=Homo sapiens GN=SMURF1 PE=1 SV=2                                      | SMUF1_HUMAN  | 86 kDa  | 0 | 0 | 1 | 0 |
| Transformer-2 protein homolog alpha OS=Homo sapiens GN=TRA2A PE=1 SV=1                                      | TRA2A_HUMAN  | 33 kDa  | 0 | 0 | 2 | 0 |
| Ribosome biogenesis protein BMS1 homolog OS=Homo sapiens GN=BMS1 PE=1 SV=1                                  | BMS1_HUMAN   | 146 kDa | 0 | 0 | 2 | 0 |
| Transient receptor potential cation channel subfamily M member 5 OS=Homo sapiens GN=TRPM5 PE=1 SV=1         | TRPM5_HUMAN  | 131 kDa | 0 | 0 | 1 | 0 |
| Metal transporter CNNM1 OS=Homo sapiens GN=CNM1 PE=2 SV=3                                                   | CNNM1_HUMAN  | 104 kDa | 0 | 0 | 2 | 0 |
| Zinc finger protein Rlf OS=Homo sapiens GN=RLF PE=1 SV=2                                                    | RLF_HUMAN    | 218 kDa | 0 | 0 | 0 | 1 |
| Nucleolar pre-ribosomal-associated protein 1 OS=Homo sapiens GN=URB1 PE=1 SV=4                              | NPA1P_HUMAN  | 254 kDa | 0 | 1 | 0 | 0 |
| Putative rRNA methyltransferase 3 OS=Homo sapiens GN=FTSJ3 PE=1 SV=2                                        | RRMJ3_HUMAN  | 97 kDa  | 0 | 0 | 1 | 0 |
| Guanine nucleotide-binding protein G(i) subunit alpha-2 OS=Homo sapiens GN=GNAI2 PE=1 SV=3                  | GNAI2_HUMAN  | 40 kDa  | 0 | 0 | 1 | 0 |
| Neurogenin-2 OS=Homo sapiens GN=NEUROG2 PE=1 SV=2                                                           | NGN2_HUMAN   | 29 kDa  | 0 | 0 | 0 | 1 |
| Methyl-CpG-binding domain protein 4 OS=Homo sapiens GN=MBD4 PE=1 SV=1                                       | MBD4_HUMAN   | 66 kDa  | 0 | 1 | 0 | 0 |
| Bystin OS=Homo sapiens GN=BYSL PE=1 SV=3                                                                    | BYST_HUMAN   | 50 kDa  | 0 | 0 | 1 | 0 |
| cAMP-specific 3',5'-cyclic phosphodiesterase 4A OS=Homo sapiens GN=PDE4A PE=1 SV=3                          | PDE4A_HUMAN  | 98 kDa  | 0 | 0 | 0 | 1 |
| FYVE, RhoGEF and PH domain-containing protein 3 OS=Homo sapiens GN=FGD3 PE=1 SV=1                           | FGD3_HUMAN   | 79 kDa  | 0 | 0 | 1 | 0 |
| Cleavage and polyadenylation specificity factor subunit 1 OS=Homo sapiens GN=CPSF1 PE=1 SV=2                | CPSF1_HUMAN  | 161 kDa | 0 | 1 | 0 | 0 |
| Microtubule-associated serine/threonine-protein kinase 3 OS=Homo sapiens GN=MAST3 PE=1 SV=2                 | MAST3_HUMAN  | 143 kDa | 0 | 0 | 1 | 0 |
| Zinc finger protein 646 OS=Homo sapiens GN=ZNF646 PE=1 SV=1                                                 | ZN646_HUMAN  | 201 kDa | 0 | 0 | 1 | 0 |
| Sprouty-related, EVH1 domain-containing protein 1 OS=Homo sapiens GN=SPRED1 PE=1 SV=2                       | SPRE1_HUMAN  | 50 kDa  | 0 | 1 | 0 | 0 |
| Ankyrin repeat and SOCS box protein 7 OS=Homo sapiens GN=ASB7 PE=1 SV=2                                     | ASB7_HUMAN   | 36 kDa  | 0 | 0 | 0 | 1 |
| 60S ribosomal protein L5 OS=Homo sapiens GN=RPL5 PE=1 SV=3                                                  | RL5_HUMAN    | 34 kDa  | 0 | 1 | 0 | 0 |
| Centrosomal protein of 72 kDa OS=Homo sapiens GN=CEP72 PE=1 SV=2                                            | CEP72_HUMAN  | 72 kDa  | 0 | 0 | 1 | 0 |
| Ubiquitin thioesterase ZRANB1 OS=Homo sapiens GN=ZRANB1 PE=1 SV=2                                           | ZRAN1_HUMAN  | 81 kDa  | 0 | 2 | 0 | 0 |
| Cdc42-interacting protein 4 OS=Homo sapiens GN=TRIP10 PE=1 SV=3                                             | CIP4_HUMAN   | 68 kDa  | 0 | 0 | 1 | 0 |
| Leucine-rich repeat and fibronectin type-III domain-containing protein 2 OS=Homo sapiens GN=LRFN2 PE=1 SV=2 | LRFN2_HUMAN  | 85 kDa  | 0 | 0 | 1 | 0 |
| Lysine-specific demethylase 6B OS=Homo sapiens GN=KDM6B PE=1 SV=4                                           | KDM6B_HUMAN  | 177 kDa | 0 | 0 | 1 | 0 |
| Coiled-coil domain-containing protein 110 OS=Homo sapiens GN=CCDC110 PE=2 SV=1                              | CC110_HUMAN  | 97 kDa  | 0 | 1 | 0 | 0 |
| Metallothionein-4 OS=Homo sapiens GN=MT4 PE=2 SV=2                                                          | MT4_HUMAN    | 7 kDa   | 0 | 0 | 1 | 0 |
| NADH dehydrogenase [ubiquinone] iron-sulfur protein 2, mitochondrial OS=Homo sapiens GN=NDUFS2 PE=1 SV=2    | NDUS2_HUMAN  | 53 kDa  | 0 | 0 | 0 | 1 |

|                                                                                                                 |              |         |   |   |   |   |
|-----------------------------------------------------------------------------------------------------------------|--------------|---------|---|---|---|---|
| Protein dispatched homolog 2 OS=Homo sapiens GN=DISP2 PE=2 SV=2                                                 | DISP2_HUMAN  | 152 kDa | 0 | 0 | 1 | 0 |
| Glutamate decarboxylase-like protein 1 OS=Homo sapiens GN=GADL1 PE=2 SV=4                                       | GADL1_HUMAN  | 59 kDa  | 0 | 0 | 0 | 1 |
| AT-rich interactive domain-containing protein 5B OS=Homo sapiens GN=ARID5B PE=1 SV=3                            | ARID5B_HUMAN | 132 kDa | 0 | 1 | 0 | 0 |
| Serine/threonine-protein kinase WNK3 OS=Homo sapiens GN=WNK3 PE=1 SV=3                                          | WNK3_HUMAN   | 198 kDa | 0 | 0 | 1 | 0 |
| E3 ubiquitin-protein ligase RNF19A OS=Homo sapiens GN=RNF19A PE=1 SV=3                                          | RNF19A_HUMAN | 91 kDa  | 0 | 0 | 1 | 0 |
| Propionyl-CoA carboxylase alpha chain, mitochondrial OS=Homo sapiens GN=PCCA PE=1 SV=4                          | PCCA_HUMAN   | 80 kDa  | 0 | 0 | 1 | 0 |
| SUMO-activating enzyme subunit 2 OS=Homo sapiens GN=UBA2 PE=1 SV=2                                              | SAE2_HUMAN   | 71 kDa  | 0 | 0 | 1 | 0 |
| SPS1/STE20-related protein kinase YSK4 OS=Homo sapiens GN=YSK4 PE=1 SV=1                                        | YSK4_HUMAN   | 151 kDa | 0 | 1 | 0 | 0 |
| E3 ubiquitin-protein ligase RNF31 OS=Homo sapiens GN=RNF31 PE=1 SV=1                                            | RNF31_HUMAN  | 120 kDa | 0 | 0 | 1 | 0 |
| Zinc finger protein 626 OS=Homo sapiens GN=ZNF626 PE=2 SV=2                                                     | ZNF626_HUMAN | 61 kDa  | 0 | 0 | 1 | 0 |
| Neuron navigator 3 OS=Homo sapiens GN=NAV3 PE=1 SV=3                                                            | NAV3_HUMAN   | 256 kDa | 0 | 1 | 0 | 0 |
| TBC1 domain family member 14 OS=Homo sapiens GN=TBC1D14 PE=1 SV=3                                               | TBC14_HUMAN  | 78 kDa  | 0 | 0 | 1 | 0 |
| Caprin-1 OS=Homo sapiens GN=CAPRIN1 PE=1 SV=2                                                                   | CAPR1_HUMAN  | 78 kDa  | 0 | 1 | 0 | 0 |
| OTU domain-containing protein 3 OS=Homo sapiens GN=OTUD3 PE=1 SV=1                                              | OTUD3_HUMAN  | 45 kDa  | 0 | 1 | 0 | 0 |
| 60S ribosomal protein L3-like OS=Homo sapiens GN=RPL3L PE=1 SV=3                                                | RL3L_HUMAN   | 46 kDa  | 0 | 1 | 0 | 0 |
| Tigger transposable element-derived protein 6 OS=Homo sapiens GN=TIGD6 PE=2 SV=2                                | TIGD6_HUMAN  | 59 kDa  | 0 | 1 | 0 | 0 |
| Sodium channel protein type 9 subunit alpha OS=Homo sapiens GN=SCN9A PE=1 SV=3                                  | SCN9A_HUMAN  | 226 kDa | 0 | 0 | 0 | 1 |
| Aminoacyl tRNA synthase complex-interacting multifunctional protein 1 OS=Homo sapiens GN=AIMP1 PE=1 SV=2        | AIMP1_HUMAN  | 34 kDa  | 0 | 0 | 1 | 0 |
| Uncharacterized protein C18orf25 OS=Homo sapiens GN=C18orf25 PE=1 SV=2                                          | CR025_HUMAN  | 43 kDa  | 0 | 1 | 0 | 0 |
| Cingulin OS=Homo sapiens GN=CGN PE=1 SV=2                                                                       | CING_HUMAN   | 136 kDa | 0 | 0 | 0 | 1 |
| Gem-associated protein 4 OS=Homo sapiens GN=GEMIN4 PE=1 SV=2                                                    | GEM14_HUMAN  | 120 kDa | 0 | 0 | 1 | 0 |
| Cytoskeleton-associated protein 5 OS=Homo sapiens GN=CKAP5 PE=1 SV=3                                            | CKAP5_HUMAN  | 226 kDa | 0 | 0 | 1 | 0 |
| Structural maintenance of chromosomes protein 5 OS=Homo sapiens GN=SMC5 PE=1 SV=2                               | SMC5_HUMAN   | 129 kDa | 0 | 0 | 1 | 0 |
| Intercellular adhesion molecule 5 OS=Homo sapiens GN=ICAM5 PE=1 SV=3                                            | ICAM5_HUMAN  | 97 kDa  | 0 | 1 | 0 | 0 |
| Methylmalonyl-CoA mutase, mitochondrial OS=Homo sapiens GN=MUT PE=1 SV=4                                        | MUTA_HUMAN   | 83 kDa  | 0 | 2 | 0 | 0 |
| Calcium/calmodulin-dependent protein kinase type 1 OS=Homo sapiens GN=CAMK1 PE=1 SV=1                           | CC1A_HUMAN   | 41 kDa  | 0 | 0 | 0 | 1 |
| Uncharacterized protein C1orf112 OS=Homo sapiens GN=C1orf112 PE=1 SV=1                                          | KAC112_HUMAN | 97 kDa  | 0 | 0 | 1 | 0 |
| PWWP domain-containing protein MUM1 OS=Homo sapiens GN=MUM1 PE=1 SV=3                                           | MUM1_HUMAN   | 79 kDa  | 0 | 0 | 0 | 1 |
| Complement C4-A OS=Homo sapiens GN=C4A PE=1 SV=1                                                                | CO4A_HUMAN   | 193 kDa | 0 | 1 | 0 | 0 |
| Holliday junction recognition protein OS=Homo sapiens GN=HJURP PE=1 SV=2                                        | HJURP_HUMAN  | 84 kDa  | 0 | 1 | 0 | 0 |
| Tyrosine-protein phosphatase non-receptor type 22 OS=Homo sapiens GN=PTPN22 PE=1 SV=2                           | PTN22_HUMAN  | 92 kDa  | 0 | 0 | 1 | 0 |
| Tankyrase-1 OS=Homo sapiens GN=TNKS PE=1 SV=2                                                                   | TNKS1_HUMAN  | 142 kDa | 0 | 1 | 0 | 0 |
| DNA polymerase epsilon catalytic subunit A OS=Homo sapiens GN=POLE PE=1 SV=5                                    | DPOE1_HUMAN  | 262 kDa | 0 | 0 | 0 | 1 |
| Coiled-coil domain-containing protein 27 OS=Homo sapiens GN=CCD27 PE=2 SV=2                                     | CCD27_HUMAN  | 75 kDa  | 0 | 0 | 0 | 1 |
| Lysine-specific demethylase 2A OS=Homo sapiens GN=KDM2A PE=1 SV=3                                               | KDM2A_HUMAN  | 133 kDa | 0 | 0 | 0 | 1 |
| RNA polymerase I-specific transcription initiation factor RRN3 OS=Homo sapiens GN=RRN3 PE=1 SV=1                | RRN3_HUMAN   | 74 kDa  | 0 | 0 | 0 | 1 |
| Olfactory receptor 6C75 OS=Homo sapiens GN=OR6C75 PE=2 SV=1                                                     | OC675_HUMAN  | 35 kDa  | 0 | 0 | 0 | 1 |
| Serine/threonine-protein phosphatase 6 regulatory ankyrin repeat subunit C OS=Homo sapiens GN=ANKRD52 PE=1 SV=1 | ANKR52_HUMAN | 115 kDa | 0 | 1 | 0 | 0 |
| Filamin-binding LIM protein 1 OS=Homo sapiens GN=FBLIM1 PE=1 SV=2                                               | FBL1_HUMAN   | 41 kDa  | 0 | 0 | 1 | 0 |
| FLYWCH family member 2 OS=Homo sapiens GN=FLYWCH2 PE=1 SV=1                                                     | FWCH2_HUMAN  | 15 kDa  | 0 | 1 | 0 | 0 |
| Low-density lipoprotein receptor-related protein 5 OS=Homo sapiens GN=LRP5 PE=1 SV=2                            | LRP5_HUMAN   | 179 kDa | 0 | 0 | 1 | 0 |
| BAH and coiled-coil domain-containing protein 1 OS=Homo sapiens GN=BAHCC1 PE=1 SV=3                             | BAHC1_HUMAN  | 277 kDa | 0 | 0 | 1 | 0 |
| Formin-2 OS=Homo sapiens GN=FMN2 PE=1 SV=4                                                                      | FMN2_HUMAN   | 180 kDa | 0 | 0 | 0 | 1 |
| Carbohydrate sulfotransferase 13 OS=Homo sapiens GN=CHST13 PE=2 SV=1                                            | CHSTD_HUMAN  | 39 kDa  | 0 | 0 | 0 | 1 |
| Glycerol-3-phosphate acyltransferase 2, mitochondrial OS=Homo sapiens GN=GPAT2 PE=2 SV=2                        | GPAT2_HUMAN  | 88 kDa  | 0 | 0 | 1 | 0 |
| C-1-tetrahydrofolate synthase, cytoplasmic OS=Homo sapiens GN=MTHFD1 PE=1 SV=3                                  | C1TC_HUMAN   | 102 kDa | 0 | 1 | 0 | 0 |
| Insulin-like growth factor-binding protein 2 OS=Homo sapiens GN=IGFBP2 PE=1 SV=2                                | IBP2_HUMAN   | 35 kDa  | 0 | 1 | 0 | 0 |
| Calcium uptake protein 1, mitochondrial OS=Homo sapiens GN=MICU1 PE=1 SV=1                                      | MICU1_HUMAN  | 54 kDa  | 0 | 0 | 1 | 0 |
| Synaptotagmin-10 OS=Homo sapiens GN=SYT10 PE=2 SV=1                                                             | SYT10_HUMAN  | 59 kDa  | 0 | 1 | 0 | 0 |
| Prolyl 4-hydroxylase subunit alpha-1 OS=Homo sapiens GN=P4HA1 PE=1 SV=2                                         | P4HA1_HUMAN  | 61 kDa  | 0 | 2 | 0 | 0 |
| ATP-dependent RNA helicase DHX29 OS=Homo sapiens GN=DHX29 PE=1 SV=2                                             | DHX29_HUMAN  | 155 kDa | 0 | 0 | 1 | 0 |
| Sal-like protein 3 OS=Homo sapiens GN=SALL3 PE=2 SV=2                                                           | SALL3_HUMAN  | 135 kDa | 0 | 1 | 0 | 0 |
| Hamartin OS=Homo sapiens GN=TSC1 PE=1 SV=2                                                                      | TSC1_HUMAN   | 130 kDa | 0 | 0 | 0 | 1 |
| Complexin-2 OS=Homo sapiens GN=CPLX2 PE=1 SV=2                                                                  | CPLX2_HUMAN  | 15 kDa  | 0 | 0 | 0 | 1 |
| PRAME family member 11 OS=Homo sapiens GN=PRAMEF11 PE=2 SV=3                                                    | PRA11_HUMAN  | 51 kDa  | 0 | 0 | 0 | 1 |
| Neuropilin and toll-like protein 1 OS=Homo sapiens GN=NETO1 PE=2 SV=2                                           | NETO1_HUMAN  | 60 kDa  | 0 | 0 | 0 | 1 |
| Putative unconventional myosin-XVB OS=Homo sapiens GN=MYO15B PE=5 SV=2                                          | MY15B_HUMAN  | 167 kDa | 0 | 0 | 1 | 0 |
| EF-hand domain-containing protein C3orf25 OS=Homo sapiens GN=C3orf25 PE=2 SV=1                                  | CC025_HUMAN  | 67 kDa  | 0 | 1 | 0 | 0 |
| Mitogen-activated protein kinase 4 OS=Homo sapiens GN=MAPK4 PE=1 SV=2                                           | MK04_HUMAN   | 66 kDa  | 0 | 1 | 0 | 0 |
| Probable proline dehydrogenase 2 OS=Homo sapiens GN=PRODH2 PE=2 SV=1                                            | PROD2_HUMAN  | 59 kDa  | 0 | 0 | 1 | 0 |
| LON peptidase N-terminal domain and RING finger protein 3 OS=Homo sapiens GN=LONRF3 PE=1 SV=1                   | LONF3_HUMAN  | 84 kDa  | 0 | 1 | 0 | 0 |
| Protein KRBA1 OS=Homo sapiens GN=KRBA1 PE=2 SV=2                                                                | KRBA1_HUMAN  | 108 kDa | 0 | 0 | 1 | 0 |
| Protein OS-9 OS=Homo sapiens GN=OS9 PE=1 SV=1                                                                   | OS9_HUMAN    | 76 kDa  | 0 | 1 | 0 | 0 |
| SH2 domain-containing adapter protein B OS=Homo sapiens GN=SHB PE=1 SV=2                                        | SHB_HUMAN    | 55 kDa  | 0 | 0 | 0 | 1 |
| Zinc finger protein 443 OS=Homo sapiens GN=ZNF443 PE=2 SV=2                                                     | ZN443_HUMAN  | 78 kDa  | 0 | 0 | 1 | 0 |
| Oxysterol-binding protein-related protein 7 OS=Homo sapiens GN=OSBPL7 PE=2 SV=1                                 | OSBL7_HUMAN  | 95 kDa  | 0 | 0 | 1 | 0 |
| Programmed cell death 6-interacting protein OS=Homo sapiens GN=PDC6IP PE=1 SV=1                                 | PDC6I_HUMAN  | 96 kDa  | 0 | 1 | 0 | 0 |
| T-cell surface glycoprotein CD4 OS=Homo sapiens GN=CD4 PE=1 SV=1                                                | CD4_HUMAN    | 51 kDa  | 0 | 0 | 1 | 0 |
| Midline-1 OS=Homo sapiens GN=MID1 PE=1 SV=1                                                                     | TRI18_HUMAN  | 75 kDa  | 0 | 0 | 0 | 1 |
| Putative protein FAM200B OS=Homo sapiens GN=FAM200B PE=5 SV=1                                                   | F200B_HUMAN  | 76 kDa  | 0 | 0 | 1 | 0 |
| SLIT and NTRK-like protein 3 OS=Homo sapiens GN=SLITRK3 PE=2 SV=2                                               | SLIK3_HUMAN  | 109 kDa | 0 | 0 | 0 | 1 |
| Vitamin D3 receptor OS=Homo sapiens GN=VDR PE=1 SV=1                                                            | VDR_HUMAN    | 48 kDa  | 0 | 0 | 0 | 1 |
| FTS and Hook-interacting protein OS=Homo sapiens GN=FAM160A2 PE=1 SV=3                                          | F16A2_HUMAN  | 106 kDa | 0 | 1 | 0 | 0 |
| Protocadherin Fat 4 OS=Homo sapiens GN=FAT4 PE=1 SV=2                                                           | FAT4_HUMAN   | 543 kDa | 0 | 1 | 0 | 0 |
| Zinc finger protein 695 OS=Homo sapiens GN=ZNF695 PE=2 SV=4                                                     | ZN695_HUMAN  | 60 kDa  | 0 | 0 | 0 | 1 |
| Alpha-(1,3)-fucosyltransferase 10 OS=Homo sapiens GN=FUT10 PE=2 SV=2                                            | FUT10_HUMAN  | 56 kDa  | 0 | 0 | 0 | 3 |
| Guanylate-binding protein 3 OS=Homo sapiens GN=GBP3 PE=2 SV=3                                                   | GBP3_HUMAN   | 68 kDa  | 0 | 0 | 2 | 0 |
| Neuronal PAS domain-containing protein 3 OS=Homo sapiens GN=NPA3 PE=2 SV=1                                      | NPA33_HUMAN  | 101 kDa | 0 | 0 | 2 | 0 |
| Kinesin-like protein KIF21A OS=Homo sapiens GN=KIF21A PE=1 SV=2                                                 | KI21A_HUMAN  | 187 kDa | 0 | 0 | 2 | 0 |
| Uncharacterized protein C20orf26 OS=Homo sapiens GN=C20orf26 PE=2 SV=3                                          | CT026_HUMAN  | 141 kDa | 0 | 0 | 2 | 0 |
| Protein C16orf88 OS=Homo sapiens GN=C16orf88 PE=1 SV=1                                                          | CP088_HUMAN  | 52 kDa  | 0 | 0 | 2 | 0 |
| ERC protein 2 OS=Homo sapiens GN=ERC2 PE=1 SV=3                                                                 | ERC2_HUMAN   | 111 kDa | 0 | 0 | 0 | 2 |

|                                                                                                                 |              |         |   |   |   |   |
|-----------------------------------------------------------------------------------------------------------------|--------------|---------|---|---|---|---|
| Histone-lysine N-methyltransferase MLL OS=Homo sapiens GN=MLL PE=1 SV=5                                         | MLL1_HUMAN   | 432 kDa | 0 | 0 | 0 | 1 |
| Collagen alpha-2(IX) chain OS=Homo sapiens GN=COL9A2 PE=1 SV=2                                                  | CO9A2_HUMAN  | 65 kDa  | 0 | 0 | 1 | 0 |
| Ankyrin repeat domain-containing protein 55 OS=Homo sapiens GN=ANKRD55 PE=2 SV=2                                | ANKR55_HUMAN | 68 kDa  | 0 | 0 | 1 | 0 |
| Zinc finger protein 230 OS=Homo sapiens GN=ZNF230 PE=2 SV=3                                                     | ZN230_HUMAN  | 55 kDa  | 0 | 0 | 1 | 0 |
| Aldehyde dehydrogenase, dimeric NADP-preferring OS=Homo sapiens GN=ALDH3A1 PE=1 SV=3                            | AL3A1_HUMAN  | 50 kDa  | 0 | 1 | 0 | 0 |
| Microtubule-associated serine/threonine-protein kinase 4 OS=Homo sapiens GN=MAST4 PE=1 SV=3                     | MAST4_HUMAN  | 284 kDa | 0 | 0 | 1 | 0 |
| Protein strawberry notch homolog 2 OS=Homo sapiens GN=SBNO2 PE=2 SV=3                                           | SBNO2_HUMAN  | 150 kDa | 0 | 0 | 0 | 1 |
| Neuronal acetylcholine receptor subunit beta-4 OS=Homo sapiens GN=CHRNB4 PE=1 SV=2                              | ACHB4_HUMAN  | 56 kDa  | 0 | 0 | 2 | 0 |
| Superkiller viralicidic activity 2-like 2 OS=Homo sapiens GN=SKIV2L2 PE=1 SV=3                                  | SK2L2_HUMAN  | 118 kDa | 0 | 0 | 0 | 1 |
| Atlantin-2 OS=Homo sapiens GN=ATL2 PE=1 SV=2                                                                    | ATLA2_HUMAN  | 66 kDa  | 0 | 0 | 1 | 0 |
| Protein MMS22-like OS=Homo sapiens GN=MMS22L PE=1 SV=3                                                          | MMS22_HUMAN  | 142 kDa | 0 | 0 | 2 | 0 |
| SET and MYND domain-containing protein 3 OS=Homo sapiens GN=SMYD3 PE=1 SV=4                                     | SMYD3_HUMAN  | 49 kDa  | 0 | 0 | 1 | 0 |
| Mothers against decapentaplegic homolog 7 OS=Homo sapiens GN=SMAD7 PE=1 SV=1                                    | SMAD7_HUMAN  | 46 kDa  | 0 | 0 | 1 | 0 |
| Tubulin monoglycylase TTL3 OS=Homo sapiens GN=TTL3 PE=1 SV=2                                                    | TTL3_HUMAN   | 87 kDa  | 0 | 0 | 1 | 0 |
| Dermatan-sulfate epimerase-like protein OS=Homo sapiens GN=DSEL PE=2 SV=2                                       | DSEL_HUMAN   | 139 kDa | 0 | 0 | 0 | 2 |
| MAM and LDL-receptor class A domain-containing protein C10orf112 OS=Homo sapiens GN=C10orf112 PE=1 SV=1         | CJ112_HUMAN  | 164 kDa | 0 | 0 | 1 | 0 |
| Cyclin-dependent kinase 10 OS=Homo sapiens GN=CDK10 PE=1 SV=1                                                   | CDK10_HUMAN  | 41 kDa  | 0 | 0 | 1 | 0 |
| ADNP homeobox protein 2 OS=Homo sapiens GN=ADNP2 PE=1 SV=1                                                      | ADNP2_HUMAN  | 123 kDa | 0 | 0 | 0 | 1 |
| Ankycorbin OS=Homo sapiens GN=RAI14 PE=1 SV=2                                                                   | RAI14_HUMAN  | 110 kDa | 0 | 0 | 1 | 0 |
| Rab3 GTPase-activating protein non-catalytic subunit OS=Homo sapiens GN=RAB3GAP2 PE=1 SV=1                      | RBGPR_HUMAN  | 156 kDa | 0 | 0 | 1 | 0 |
| Cullin-associated NEDD8-dissociated protein 1 OS=Homo sapiens GN=CAND1 PE=1 SV=2                                | CAND1_HUMAN  | 136 kDa | 0 | 0 | 1 | 0 |
| Ras GTPase-activating protein nGAP OS=Homo sapiens GN=RASAL2 PE=1 SV=2                                          | NGAP_HUMAN   | 129 kDa | 0 | 0 | 1 | 0 |
| 26S protease regulatory subunit 7 OS=Homo sapiens GN=PSMC2 PE=1 SV=3                                            | PRS7_HUMAN   | 49 kDa  | 0 | 0 | 1 | 0 |
| Epithelial cell-transforming sequence 2 oncogene-like OS=Homo sapiens GN=ECT2L PE=2 SV=2                        | ECT2L_HUMAN  | 105 kDa | 0 | 0 | 1 | 0 |
| Dynamin-like 120 kDa protein, mitochondrial OS=Homo sapiens GN=OPA1 PE=1 SV=3                                   | OPA1_HUMAN   | 112 kDa | 0 | 0 | 1 | 0 |
| Gamma-glutamyltranspeptidase 1 OS=Homo sapiens GN=GGT1 PE=1 SV=2                                                | GGT1_HUMAN   | 61 kDa  | 0 | 0 | 1 | 0 |
| Tripartite motif-containing protein 51 OS=Homo sapiens GN=TRIM51 PE=2 SV=2                                      | TRIS1_HUMAN  | 52 kDa  | 0 | 0 | 1 | 0 |
| Disintegrin and metalloproteinase domain-containing protein 20 OS=Homo sapiens GN=ADAM20 PE=2 SV=2              | ADA20_HUMAN  | 82 kDa  | 0 | 0 | 1 | 0 |
| snRNA-activating protein complex subunit 4 OS=Homo sapiens GN=SNAPC4 PE=1 SV=1                                  | SNPC4_HUMAN  | 159 kDa | 0 | 0 | 1 | 0 |
| Cytoplasmic polyadenylation element-binding protein 3 OS=Homo sapiens GN=CPEB3 PE=1 SV=2                        | CPEB3_HUMAN  | 76 kDa  | 0 | 0 | 1 | 0 |
| TBC1 domain family member 30 OS=Homo sapiens GN=TBC1D30 PE=1 SV=2                                               | TBC30_HUMAN  | 103 kDa | 0 | 1 | 0 | 0 |
| Cell surface glycoprotein MUC18 OS=Homo sapiens GN=MCAM PE=1 SV=2                                               | MUC18_HUMAN  | 72 kDa  | 0 | 0 | 1 | 0 |
| Acyl-CoA synthetase family member 3, mitochondrial OS=Homo sapiens GN=ACSF3 PE=1 SV=3                           | ACSF3_HUMAN  | 64 kDa  | 0 | 0 | 0 | 1 |
| CWF19-like protein 2 OS=Homo sapiens GN=CWF19L2 PE=1 SV=4                                                       | C19L2_HUMAN  | 104 kDa | 0 | 0 | 0 | 1 |
| CDK5 regulatory subunit-associated protein 2 OS=Homo sapiens GN=CDK5RAP2 PE=1 SV=5                              | CKSP2_HUMAN  | 215 kDa | 0 | 0 | 0 | 1 |
| F-box only protein 24 OS=Homo sapiens GN=FBXO24 PE=2 SV=2                                                       | FBX24_HUMAN  | 65 kDa  | 0 | 0 | 0 | 1 |
| Uncharacterized protein KIAA1211 OS=Homo sapiens GN=KIAA1211 PE=1 SV=3                                          | K1211_HUMAN  | 137 kDa | 0 | 0 | 0 | 1 |
| POU domain, class 3, transcription factor 2 OS=Homo sapiens GN=POU3F2 PE=1 SV=4                                 | PO3F2_HUMAN  | 47 kDa  | 0 | 0 | 0 | 1 |
| Rho GTPase-activating protein 32 OS=Homo sapiens GN=ARHGAP32 PE=1 SV=1                                          | RHG32_HUMAN  | 231 kDa | 0 | 0 | 0 | 1 |
| VPS10 domain-containing receptor SorCS1 OS=Homo sapiens GN=SORCS1 PE=2 SV=3                                     | SORC1_HUMAN  | 130 kDa | 0 | 0 | 0 | 1 |
| Tripartite motif-containing protein 29 OS=Homo sapiens GN=TRIM29 PE=1 SV=2                                      | TRI29_HUMAN  | 66 kDa  | 0 | 0 | 0 | 1 |
| Zinc finger protein 284 OS=Homo sapiens GN=ZNF284 PE=2 SV=1                                                     | ZN284_HUMAN  | 69 kDa  | 0 | 0 | 0 | 1 |
| Zinc finger protein 765 OS=Homo sapiens GN=ZNF765 PE=2 SV=2                                                     | ZN765_HUMAN  | 62 kDa  | 0 | 0 | 0 | 1 |
| Zinc finger protein 888 OS=Homo sapiens GN=ZNF888 PE=3 SV=1                                                     | ZN888_HUMAN  | 59 kDa  | 0 | 0 | 0 | 1 |
| 6-phosphogluconate dehydrogenase, decarboxylating OS=Homo sapiens GN=PGD PE=1 SV=3                              | 6PGD_HUMAN   | 53 kDa  | 0 | 1 | 0 | 0 |
| Arginine decarboxylase OS=Homo sapiens GN=ADC PE=2 SV=1                                                         | ADC_HUMAN    | 50 kDa  | 0 | 1 | 0 | 0 |
| Coiled-coil domain-containing protein 162 OS=Homo sapiens GN=CCDC162 PE=2 SV=3                                  | CC162_HUMAN  | 104 kDa | 0 | 1 | 0 | 0 |
| H(+)/Cl(-) exchange transporter 5 OS=Homo sapiens GN=CLCN5 PE=1 SV=1                                            | CLCN5_HUMAN  | 83 kDa  | 0 | 1 | 0 | 0 |
| Cysteine-rich protein 1 OS=Homo sapiens GN=CRIP1 PE=1 SV=3                                                      | CRIP1_HUMAN  | 9 kDa   | 0 | 1 | 0 | 0 |
| Calsyntenin-2 OS=Homo sapiens GN=CLSTN2 PE=1 SV=2                                                               | CSTN2_HUMAN  | 107 kDa | 0 | 1 | 0 | 0 |
| Dextrin OS=Homo sapiens GN=DSTN PE=1 SV=3                                                                       | DEST_HUMAN   | 19 kDa  | 0 | 1 | 0 | 0 |
| Serine hydroxymethyltransferase, cytosolic OS=Homo sapiens GN=SHMT1 PE=1 SV=1                                   | GLYC_HUMAN   | 53 kDa  | 0 | 1 | 0 | 0 |
| Metabotropic glutamate receptor 2 OS=Homo sapiens GN=GRM2 PE=2 SV=2                                             | GRM2_HUMAN   | 96 kDa  | 0 | 1 | 0 | 0 |
| Matrix metalloproteinase-28 OS=Homo sapiens GN=MMP28 PE=2 SV=2                                                  | MMP28_HUMAN  | 59 kDa  | 0 | 1 | 0 | 0 |
| Protein PML OS=Homo sapiens GN=PML PE=1 SV=3                                                                    | PML_HUMAN    | 98 kDa  | 0 | 1 | 0 | 0 |
| Proline-rich protein 25 OS=Homo sapiens GN=PRR25 PE=4 SV=1                                                      | PRR25_HUMAN  | 41 kDa  | 0 | 1 | 0 | 0 |
| Regulator of nonsense transcripts 1 OS=Homo sapiens GN=UPF1 PE=1 SV=2                                           | RENT1_HUMAN  | 124 kDa | 0 | 1 | 0 | 0 |
| 28S ribosomal protein S27, mitochondrial OS=Homo sapiens GN=MRPS27 PE=1 SV=3                                    | RT27_HUMAN   | 48 kDa  | 0 | 1 | 0 | 0 |
| Sodium channel protein type 8 subunit alpha OS=Homo sapiens GN=SCN8A PE=1 SV=1                                  | SCN8A_HUMAN  | 225 kDa | 0 | 1 | 0 | 0 |
| Transcription initiation factor TFIID subunit 6 OS=Homo sapiens GN=TAF6 PE=1 SV=1                               | TAF6_HUMAN   | 73 kDa  | 0 | 1 | 0 | 0 |
| Tropomodulin-2 OS=Homo sapiens GN=TMOD2 PE=1 SV=1                                                               | TMOD2_HUMAN  | 40 kDa  | 0 | 1 | 0 | 0 |
| Ubiquitin carboxyl-terminal hydrolase 29 OS=Homo sapiens GN=USP29 PE=2 SV=1                                     | UBP29_HUMAN  | 104 kDa | 0 | 1 | 0 | 0 |
| UDP-glucose 6-dehydrogenase OS=Homo sapiens GN=UGDH PE=1 SV=1                                                   | UGDH_HUMAN   | 55 kDa  | 0 | 2 | 0 | 0 |
| Disintegrin and metalloproteinase domain-containing protein 30 OS=Homo sapiens GN=ADAM30 PE=2 SV=2              | ADA30_HUMAN  | 89 kDa  | 0 | 0 | 1 | 0 |
| Alstrom syndrome protein 1 OS=Homo sapiens GN=ALMS1 PE=1 SV=3                                                   | ALMS1_HUMAN  | 461 kDa | 0 | 0 | 1 | 0 |
| Actin-related protein 3B OS=Homo sapiens GN=ACTR3B PE=1 SV=1                                                    | ARP3B_HUMAN  | 48 kDa  | 0 | 0 | 1 | 0 |
| Breast carcinoma-amplified sequence 3 OS=Homo sapiens GN=BCAS3 PE=1 SV=3                                        | BCAS3_HUMAN  | 101 kDa | 0 | 0 | 1 | 0 |
| Uncharacterized protein C1orf173 OS=Homo sapiens GN=C1orf173 PE=2 SV=1                                          | CA173_HUMAN  | 168 kDa | 0 | 0 | 1 | 0 |
| Uncharacterized protein C12orf4 OS=Homo sapiens GN=C12orf4 PE=2 SV=1                                            | CL004_HUMAN  | 64 kDa  | 0 | 0 | 1 | 0 |
| Cysteine-rich secretory protein LCLL domain-containing 1 OS=Homo sapiens GN=CRISPLD1 PE=1 SV=1                  | CRLD1_HUMAN  | 57 kDa  | 0 | 0 | 1 | 0 |
| H/ACA ribonucleoprotein complex subunit 4 OS=Homo sapiens GN=DKC1 PE=1 SV=3                                     | DKC1_HUMAN   | 58 kDa  | 0 | 0 | 1 | 0 |
| Eukaryotic translation initiation factor 3 subunit L OS=Homo sapiens GN=EIF3L PE=1 SV=1                         | EIF3L_HUMAN  | 67 kDa  | 0 | 0 | 1 | 0 |
| Protein FAM102A OS=Homo sapiens GN=FAM102A PE=2 SV=2                                                            | F102A_HUMAN  | 42 kDa  | 0 | 0 | 1 | 0 |
| Neutral alpha-glucosidase C OS=Homo sapiens GN=GANC PE=2 SV=3                                                   | GANC_HUMAN   | 104 kDa | 0 | 0 | 1 | 0 |
| Putative golgin subfamily A member 2B OS=Homo sapiens GN=GOLGA2P5 PE=5 SV=1                                     | GGA2B_HUMAN  | 15 kDa  | 0 | 0 | 1 | 0 |
| Histidine ammonia-lyase OS=Homo sapiens GN=HAL PE=1 SV=1                                                        | HUTH_HUMAN   | 73 kDa  | 0 | 0 | 1 | 0 |
| Membrane-associated guanylate kinase, WW and PDZ domain-containing protein 3 OS=Homo sapiens GN=MAGI3 PE=1 SV=1 | MAGI3_HUMAN  | 166 kDa | 0 | 0 | 1 | 0 |
| Mediator of RNA polymerase II transcription subunit 12 OS=Homo sapiens GN=MED12 PE=1 SV=4                       | MED12_HUMAN  | 243 kDa | 0 | 0 | 1 | 0 |
| Neurobeachin-like protein 1 OS=Homo sapiens GN=NBAL1 PE=2 SV=3                                                  | NBEL1_HUMAN  | 307 kDa | 0 | 0 | 1 | 0 |
| Tomoregulin-1 OS=Homo sapiens GN=TMEFF1 PE=1 SV=1                                                               | TEFF1_HUMAN  | 41 kDa  | 0 | 0 | 1 | 0 |
| Serine/threonine-protein kinase ULK2 OS=Homo sapiens GN=ULK2 PE=1 SV=3                                          | ULK2_HUMAN   | 113 kDa | 0 | 0 | 1 | 0 |
| Zinc finger and BTB domain-containing protein 17 OS=Homo sapiens GN=ZBTB17 PE=1 SV=3                            | ZBT17_HUMAN  | 88 kDa  | 0 | 0 | 1 | 0 |

|                                                                                                 |              |         |   |   |   |   |
|-------------------------------------------------------------------------------------------------|--------------|---------|---|---|---|---|
| Putative deoxyribose-phosphate aldolase OS=Homo sapiens GN=DERA PE=1 SV=2                       | DEOC_HUMAN   | 35 kDa  | 0 | 1 | 0 | 0 |
| Exosome complex component RRP40 OS=Homo sapiens GN=EXOSC3 PE=1 SV=3                             | EXOSC3_HUMAN | 30 kDa  | 0 | 1 | 0 | 0 |
| Dual specificity protein kinase CLK3 OS=Homo sapiens GN=CLK3 PE=1 SV=3                          | CLK3_HUMAN   | 74 kDa  | 0 | 1 | 0 | 0 |
| Intraflagellar transport protein 81 homolog OS=Homo sapiens GN=IFT81 PE=1 SV=1                  | IFT81_HUMAN  | 80 kDa  | 0 | 1 | 0 | 0 |
| F-box only protein 22 OS=Homo sapiens GN=FBXO22 PE=1 SV=1                                       | FBX22_HUMAN  | 45 kDa  | 0 | 1 | 0 | 0 |
| Mitotic spindle assembly checkpoint protein MAD1 OS=Homo sapiens GN=MAD1L1 PE=1 SV=2            | MD1L1_HUMAN  | 83 kDa  | 0 | 0 | 0 | 1 |
| Nucleolar and spindle-associated protein 1 OS=Homo sapiens GN=NUSAP1 PE=1 SV=1                  | NUSAP_HUMAN  | 49 kDa  | 0 | 0 | 1 | 0 |
| Palmitoyltransferase ZDHHC3 OS=Homo sapiens GN=ZDHHC3 PE=1 SV=1                                 | ZDHCS_HUMAN  | 37 kDa  | 0 | 0 | 1 | 0 |
| Zinc finger protein 480 OS=Homo sapiens GN=ZNF480 PE=1 SV=2                                     | ZN480_HUMAN  | 62 kDa  | 0 | 0 | 1 | 0 |
| Zinc finger protein 432 OS=Homo sapiens GN=ZNF432 PE=1 SV=1                                     | ZN432_HUMAN  | 75 kDa  | 0 | 0 | 0 | 1 |
| CAP-Gly domain-containing linker protein 2 OS=Homo sapiens GN=CLIP2 PE=1 SV=1                   | CLIP2_HUMAN  | 116 kDa | 0 | 0 | 0 | 1 |
| Syntaxin-6 OS=Homo sapiens GN=STX6 PE=1 SV=1                                                    | STX6_HUMAN   | 29 kDa  | 0 | 1 | 0 | 0 |
| Zinc finger protein 76 OS=Homo sapiens GN=ZNF76 PE=2 SV=2                                       | ZNF76_HUMAN  | 62 kDa  | 0 | 0 | 0 | 1 |
| Vacuolar protein sorting-associated protein 35 OS=Homo sapiens GN=VPS35 PE=1 SV=2               | VPS35_HUMAN  | 92 kDa  | 0 | 1 | 0 | 0 |
| Plasminogen OS=Homo sapiens GN=PLG PE=1 SV=2                                                    | PLMN_HUMAN   | 91 kDa  | 0 | 0 | 0 | 1 |
| WD repeat-containing protein 52 OS=Homo sapiens GN=WDR52 PE=1 SV=1                              | WDR52_HUMAN  | 112 kDa | 0 | 0 | 0 | 1 |
| Polypeptide N-acetylglactosaminyltransferase 13 OS=Homo sapiens GN=GALNT13 PE=2 SV=2            | GLT13_HUMAN  | 64 kDa  | 0 | 0 | 1 | 0 |
| Inactive dipeptidyl peptidase 10 OS=Homo sapiens GN=DPP10 PE=1 SV=2                             | DPP10_HUMAN  | 91 kDa  | 0 | 0 | 0 | 1 |
| Putative uncharacterized protein C21orf32 OS=Homo sapiens GN=C21orf32 PE=2 SV=1                 | CU032_HUMAN  | 21 kDa  | 0 | 0 | 1 | 0 |
| Microspherule protein 1 OS=Homo sapiens GN=MCRS1 PE=1 SV=1                                      | MCRS1_HUMAN  | 52 kDa  | 0 | 0 | 1 | 0 |
| Guanine nucleotide-binding protein subunit alpha-14 OS=Homo sapiens GN=GNA14 PE=2 SV=1          | GNA14_HUMAN  | 42 kDa  | 0 | 0 | 0 | 1 |
| TNF receptor-associated factor 2 OS=Homo sapiens GN=TRAF2 PE=1 SV=2                             | TRAF2_HUMAN  | 56 kDa  | 0 | 0 | 0 | 1 |
| BUD13 homolog OS=Homo sapiens GN=BUD13 PE=1 SV=1                                                | BUD13_HUMAN  | 71 kDa  | 0 | 1 | 0 | 0 |
| Coiled-coil domain-containing protein 13 OS=Homo sapiens GN=CCDC13 PE=2 SV=2                    | CCD13_HUMAN  | 81 kDa  | 0 | 1 | 0 | 0 |
| Testican-3 OS=Homo sapiens GN=SPOCK3 PE=1 SV=2                                                  | TICN3_HUMAN  | 49 kDa  | 0 | 0 | 1 | 0 |
| Carboxypeptidase D OS=Homo sapiens GN=CPD PE=1 SV=2                                             | CBPD_HUMAN   | 153 kDa | 0 | 0 | 1 | 0 |
| Coiled-coil domain-containing protein 132 OS=Homo sapiens GN=CCDC132 PE=1 SV=3                  | CC132_HUMAN  | 111 kDa | 0 | 0 | 1 | 0 |
| Ankyrin repeat domain-containing protein 22 OS=Homo sapiens GN=ANKRD22 PE=2 SV=1                | ANR22_HUMAN  | 22 kDa  | 0 | 0 | 1 | 0 |
| Ribonuclease P protein subunit p29 OS=Homo sapiens GN=POP4 PE=1 SV=2                            | RPP29_HUMAN  | 25 kDa  | 0 | 0 | 1 | 0 |
| AFG3-like protein 2 OS=Homo sapiens GN=AFG3L2 PE=1 SV=2                                         | AFG32_HUMAN  | 89 kDa  | 0 | 0 | 0 | 1 |
| Zinc finger protein 331 OS=Homo sapiens GN=ZNF331 PE=2 SV=1                                     | ZN331_HUMAN  | 54 kDa  | 0 | 0 | 0 | 1 |
| Fetuin-B OS=Homo sapiens GN=FETUB PE=1 SV=2                                                     | FETUB_HUMAN  | 42 kDa  | 0 | 0 | 0 | 1 |
| Disco-interacting protein 2 homolog C OS=Homo sapiens GN=DIP2C PE=2 SV=2                        | DIP2C_HUMAN  | 171 kDa | 0 | 1 | 0 | 0 |
| Oviduct-specific glycoprotein OS=Homo sapiens GN=OVGP1 PE=2 SV=1                                | OVGP1_HUMAN  | 75 kDa  | 0 | 0 | 1 | 0 |
| Zinc finger protein 43 OS=Homo sapiens GN=ZNF43 PE=2 SV=4                                       | ZNF43_HUMAN  | 94 kDa  | 0 | 1 | 0 | 0 |
| STAR-related lipid transfer protein 8 OS=Homo sapiens GN=STAR8 PE=1 SV=2                        | STAR8_HUMAN  | 113 kDa | 0 | 1 | 0 | 0 |
| Kelch repeat and BTB domain-containing protein 5 OS=Homo sapiens GN=KBTBD5 PE=1 SV=2            | KBTB5_HUMAN  | 69 kDa  | 0 | 1 | 0 | 0 |
| Sorbin and SH3 domain-containing protein 1 OS=Homo sapiens GN=SORBS1 PE=1 SV=3                  | SRBS1_HUMAN  | 143 kDa | 0 | 0 | 1 | 0 |
| RNA pseudouridylate synthase domain-containing protein 2 OS=Homo sapiens GN=RPUSD2 PE=1 SV=2    | RUSD2_HUMAN  | 61 kDa  | 0 | 0 | 1 | 0 |
| Dedicator of cytokinesis protein 6 OS=Homo sapiens GN=DOCK6 PE=1 SV=3                           | DOCK6_HUMAN  | 230 kDa | 0 | 1 | 0 | 0 |
| Semaphorin-6B OS=Homo sapiens GN=SEMA6B PE=1 SV=4                                               | SEM6B_HUMAN  | 95 kDa  | 0 | 1 | 0 | 0 |
| Lipase member H OS=Homo sapiens GN=LIPH PE=1 SV=1                                               | LIPH_HUMAN   | 51 kDa  | 0 | 1 | 0 | 0 |
| Zinc finger protein 708 OS=Homo sapiens GN=ZNF708 PE=2 SV=4                                     | ZN708_HUMAN  | 65 kDa  | 0 | 0 | 1 | 0 |
| Beta-2-syntrophin OS=Homo sapiens GN=SNB2 PE=1 SV=1                                             | SNTB2_HUMAN  | 58 kDa  | 0 | 0 | 1 | 0 |
| Glutamate receptor-interacting protein 1 OS=Homo sapiens GN=GRIP1 PE=1 SV=3                     | GRIP1_HUMAN  | 122 kDa | 0 | 1 | 0 | 0 |
| Nuclear RNA export factor 1 OS=Homo sapiens GN=NXF1 PE=1 SV=1                                   | NXF1_HUMAN   | 70 kDa  | 0 | 0 | 1 | 0 |
| Voltage-dependent calcium channel subunit alpha-2/delta-1 OS=Homo sapiens GN=CACNA2D1 PE=1 SV=3 | CA2D1_HUMAN  | 125 kDa | 0 | 0 | 0 | 1 |
| TATA-binding protein-associated factor 2N OS=Homo sapiens GN=TAF15 PE=1 SV=1                    | RBP56_HUMAN  | 62 kDa  | 0 | 0 | 0 | 1 |
| Cytosolic 10-formyltetrahydrofolate dehydrogenase OS=Homo sapiens GN=ALDH1L1 PE=1 SV=2          | AL1L1_HUMAN  | 99 kDa  | 0 | 0 | 0 | 1 |
| Regulating synaptic membrane exocytosis protein 3 OS=Homo sapiens GN=RIMS3 PE=1 SV=1            | RIMS3_HUMAN  | 33 kDa  | 0 | 0 | 0 | 1 |
| Zinc finger protein 440 OS=Homo sapiens GN=ZNF440 PE=2 SV=1                                     | ZN440_HUMAN  | 69 kDa  | 0 | 0 | 1 | 0 |
| Myosin-binding protein C, slow-type OS=Homo sapiens GN=MYBPC1 PE=1 SV=2                         | MYPC1_HUMAN  | 128 kDa | 0 | 0 | 0 | 1 |
| Choline transporter-like protein 1 OS=Homo sapiens GN=SLC4A1 PE=1 SV=1                          | CTL1_HUMAN   | 73 kDa  | 0 | 0 | 0 | 1 |
| Zinc finger protein 36, C3H1 type-like 1 OS=Homo sapiens GN=ZFP36L1 PE=1 SV=1                   | TISB_HUMAN   | 36 kDa  | 0 | 0 | 1 | 0 |
| Band 4.1-like protein 1 OS=Homo sapiens GN=EPB41L1 PE=1 SV=2                                    | E41L1_HUMAN  | 99 kDa  | 0 | 1 | 0 | 0 |
| Probable phospholipid-transporting ATPase IIA OS=Homo sapiens GN=ATP9A PE=1 SV=3                | ATP9A_HUMAN  | 119 kDa | 0 | 0 | 0 | 1 |
| Sodium/glucose cotransporter 1 OS=Homo sapiens GN=SLC5A1 PE=1 SV=1                              | SC5A1_HUMAN  | 74 kDa  | 0 | 0 | 1 | 0 |
| Ephrin type-A receptor 8 OS=Homo sapiens GN=EPHA8 PE=1 SV=2                                     | EPHA8_HUMAN  | 111 kDa | 0 | 0 | 0 | 1 |
| ATP-binding cassette sub-family B member 10, mitochondrial OS=Homo sapiens GN=ABCB10 PE=1 SV=2  | ABCB10_HUMAN | 79 kDa  | 0 | 0 | 1 | 0 |
| F-box/WD repeat-containing protein 10 OS=Homo sapiens GN=FBXW10 PE=2 SV=2                       | FBW10_HUMAN  | 120 kDa | 0 | 0 | 0 | 1 |
| Dual specificity testis-specific protein kinase 1 OS=Homo sapiens GN=TESK1 PE=1 SV=2            | TESK1_HUMAN  | 68 kDa  | 0 | 1 | 0 | 0 |
| Uncharacterized protein C1orf127 OS=Homo sapiens GN=C1orf127 PE=2 SV=2                          | CA127_HUMAN  | 70 kDa  | 0 | 1 | 0 | 0 |
| Tankyrase-2 OS=Homo sapiens GN=TNKS2 PE=1 SV=1                                                  | TNKS2_HUMAN  | 127 kDa | 0 | 0 | 1 | 0 |
| Integrin alpha-D OS=Homo sapiens GN=ITGAD PE=1 SV=2                                             | ITAD_HUMAN   | 127 kDa | 0 | 0 | 1 | 0 |
| Rho guanine nucleotide exchange factor 40 OS=Homo sapiens GN=ARHGEF40 PE=1 SV=3                 | ARH40_HUMAN  | 165 kDa | 0 | 0 | 1 | 0 |
| Calcium-binding protein p22 OS=Homo sapiens GN=CHP PE=1 SV=3                                    | CHP1_HUMAN   | 22 kDa  | 0 | 0 | 1 | 0 |
| Zinc finger protein 93 OS=Homo sapiens GN=ZNF93 PE=2 SV=4                                       | ZNF93_HUMAN  | 71 kDa  | 0 | 0 | 1 | 0 |
| Pre-mRNA-processing factor 17 OS=Homo sapiens GN=CDK40 PE=1 SV=1                                | PRP17_HUMAN  | 66 kDa  | 0 | 0 | 0 | 1 |
| Ubiquitin carboxyl-terminal hydrolase 36 OS=Homo sapiens GN=USP36 PE=1 SV=3                     | UBP36_HUMAN  | 123 kDa | 0 | 1 | 0 | 0 |
| Serine/threonine-protein kinase tousled-like 1 OS=Homo sapiens GN=TLK1 PE=1 SV=2                | TLK1_HUMAN   | 87 kDa  | 0 | 1 | 0 | 0 |
| Zinc finger protein 652 OS=Homo sapiens GN=ZNF652 PE=1 SV=3                                     | ZN652_HUMAN  | 70 kDa  | 0 | 0 | 0 | 1 |
| tRNA (guanine-N(7)-)-methyltransferase subunit WDR4 OS=Homo sapiens GN=WDR4 PE=1 SV=2           | WDR4_HUMAN   | 45 kDa  | 0 | 1 | 0 | 0 |
| Regulating synaptic membrane exocytosis protein 2 OS=Homo sapiens GN=RIMS2 PE=1 SV=2            | RIMS2_HUMAN  | 160 kDa | 0 | 0 | 1 | 0 |
| Moesin OS=Homo sapiens GN=MSN PE=1 SV=3                                                         | MOES_HUMAN   | 68 kDa  | 0 | 1 | 0 | 0 |
| POC1 centriolar protein homolog A OS=Homo sapiens GN=POC1A PE=2 SV=2                            | POC1A_HUMAN  | 45 kDa  | 0 | 0 | 0 | 1 |
| Protein artemis OS=Homo sapiens GN=DCLRE1C PE=1 SV=2                                            | DCR1C_HUMAN  | 78 kDa  | 0 | 0 | 0 | 1 |
| Inverted formin-2 OS=Homo sapiens GN=INF2 PE=1 SV=2                                             | INF2_HUMAN   | 136 kDa | 0 | 0 | 1 | 0 |
| Tuberin OS=Homo sapiens GN=TSC2 PE=1 SV=2                                                       | TSC2_HUMAN   | 201 kDa | 0 | 0 | 0 | 1 |
| Zinc finger protein 497 OS=Homo sapiens GN=ZNF497 PE=2 SV=2                                     | ZN497_HUMAN  | 55 kDa  | 0 | 0 | 0 | 1 |
| Cancer/testis antigen 75 OS=Homo sapiens GN=CT75 PE=2 SV=2                                      | CT75_HUMAN   | 41 kDa  | 0 | 0 | 1 | 0 |
| Zinc finger protein 792 OS=Homo sapiens GN=ZNF792 PE=2 SV=2                                     | ZN792_HUMAN  | 72 kDa  | 0 | 0 | 1 | 0 |
| Leucyl-cystinyl aminopeptidase OS=Homo sapiens GN=LNPEP PE=1 SV=3                               | LCAP_HUMAN   | 117 kDa | 0 | 0 | 1 | 0 |

|                                                                                                                  |             |         |   |   |   |   |
|------------------------------------------------------------------------------------------------------------------|-------------|---------|---|---|---|---|
| Golgi-specific brefeldin A-resistance guanine nucleotide exchange factor 1 OS=Homo sapiens GN=GBF1 PE=GBF1_HUMAN | 206 kDa     | 0       | 0 | 1 | 0 |   |
| Mitogen-activated protein kinase kinase kinase 3 OS=Homo sapiens GN=MAP4K3 PE=1 SV=1                             | M4K3_HUMAN  | 101 kDa | 0 | 0 | 0 | 1 |
| Semaphorin-3C OS=Homo sapiens GN=SEMA3C PE=1 SV=2                                                                | SEM3C_HUMAN | 85 kDa  | 0 | 0 | 0 | 1 |
| Poly(A) polymerase beta OS=Homo sapiens GN=PAPOLB PE=2 SV=1                                                      | PAPOB_HUMAN | 72 kDa  | 0 | 0 | 1 | 0 |
| Eukaryotic translation initiation factor 3 subunit H OS=Homo sapiens GN=EIF3H PE=1 SV=1                          | EIF3H_HUMAN | 40 kDa  | 0 | 1 | 0 | 1 |
| Keratin, type II cytoskeletal 79 OS=Homo sapiens GN=KRT79 PE=1 SV=2                                              | K2C79_HUMAN | 58 kDa  | 0 | 1 | 0 | 1 |
| Programmed cell death protein 6 OS=Homo sapiens GN=PDCD6 PE=1 SV=1                                               | PDCD6_HUMAN | 22 kDa  | 0 | 1 | 0 | 1 |
| 40S ribosomal protein S15 OS=Homo sapiens GN=RPS15 PE=1 SV=2                                                     | RS15_HUMAN  | 17 kDa  | 0 | 1 | 0 | 1 |
| 5-hydroxytryptamine receptor 1E OS=Homo sapiens GN=HTR1E PE=2 SV=1                                               | 5HT1E_HUMAN | 42 kDa  | 0 | 0 | 1 | 1 |
| Kinesin heavy chain isoform 5C OS=Homo sapiens GN=KIF5C PE=1 SV=1                                                | KIF5C_HUMAN | 109 kDa | 0 | 0 | 1 | 1 |
| Plasma alpha-L-fucosidase OS=Homo sapiens GN=FUCA2 PE=1 SV=2                                                     | FUCO2_HUMAN | 54 kDa  | 0 | 1 | 1 | 0 |
| Protein disulfide-isomerase A6 OS=Homo sapiens GN=PDIA6 PE=1 SV=1                                                | PDIA6_HUMAN | 48 kDa  | 0 | 1 | 1 | 0 |
| 40S ribosomal protein S14 OS=Homo sapiens GN=RPS14 PE=1 SV=3                                                     | RS14_HUMAN  | 16 kDa  | 0 | 1 | 1 | 0 |
| 182 kDa tankyrase-1-binding protein OS=Homo sapiens GN=TNKS1BP1 PE=1 SV=4                                        | TB182_HUMAN | 182 kDa | 0 | 1 | 1 | 0 |
| 6-phosphofructokinase, liver type OS=Homo sapiens GN=PFKL PE=1 SV=6                                              | K6PL_HUMAN  | 85 kDa  | 0 | 1 | 1 | 0 |
| Septin-7 OS=Homo sapiens GN=SEPT7 PE=1 SV=2                                                                      | SEPT7_HUMAN | 51 kDa  | 0 | 1 | 1 | 0 |
| Potassium channel subfamily K member 5 OS=Homo sapiens GN=KCNK5 PE=1 SV=1                                        | KCNK5_HUMAN | 55 kDa  | 0 | 1 | 1 | 0 |
| Aldo-keto reductase family 1 member C2 OS=Homo sapiens GN=AKR1C2 PE=1 SV=3                                       | AK1C2_HUMAN | 37 kDa  | 0 | 0 | 1 | 1 |
| Large neutral amino acids transporter small subunit 4 OS=Homo sapiens GN=SLC43A2 PE=1 SV=1                       | LAT4_HUMAN  | 63 kDa  | 0 | 1 | 0 | 1 |
| Succinate dehydrogenase [ubiquinone] iron-sulfur subunit, mitochondrial OS=Homo sapiens GN=SDHB PE=1 SV=1        | DHSB_HUMAN  | 32 kDa  | 0 | 1 | 1 | 0 |
| Protein FAM198B OS=Homo sapiens GN=FAM198B PE=2 SV=1                                                             | F198B_HUMAN | 58 kDa  | 0 | 1 | 0 | 1 |
| Angiotensinogen-related protein 6 OS=Homo sapiens GN=ANGPTL6 PE=1 SV=1                                           | ANGL6_HUMAN | 52 kDa  | 0 | 1 | 1 | 0 |
| Down syndrome cell adhesion molecule-like protein 1 OS=Homo sapiens GN=DSCAML1 PE=1 SV=2                         | DSCL1_HUMAN | 224 kDa | 0 | 0 | 1 | 1 |
| Apoptosis facilitator Bcl-2-like protein 14 OS=Homo sapiens GN=BCL2L14 PE=1 SV=1                                 | B2L14_HUMAN | 37 kDa  | 0 | 0 | 1 | 1 |
| Putative uncharacterized protein encoded by LINC00114 OS=Homo sapiens GN=LINC00114 PE=5 SV=1                     | CU024_HUMAN | 16 kDa  | 0 | 0 | 1 | 1 |
| Protein FAM71B OS=Homo sapiens GN=FAM71B PE=1 SV=2                                                               | FA71B_HUMAN | 65 kDa  | 0 | 1 | 0 | 1 |
| Golgin subfamily A member 8A OS=Homo sapiens GN=GOLGA8A PE=1 SV=3                                                | GOG8A_HUMAN | 70 kDa  | 0 | 1 | 0 | 1 |
| Bile acyl-CoA synthetase OS=Homo sapiens GN=SLC27A5 PE=1 SV=1                                                    | S27A5_HUMAN | 75 kDa  | 0 | 0 | 1 | 0 |
| Cell division cycle protein 27 homolog OS=Homo sapiens GN=CDC27 PE=1 SV=2                                        | CDC27_HUMAN | 92 kDa  | 0 | 0 | 1 | 0 |
| Zinc finger protein 527 OS=Homo sapiens GN=ZNF527 PE=2 SV=2                                                      | ZN527_HUMAN | 71 kDa  | 0 | 0 | 1 | 1 |
| Core-binding factor subunit beta OS=Homo sapiens GN=CBFB PE=1 SV=2                                               | PEBB_HUMAN  | 22 kDa  | 0 | 0 | 0 | 1 |
| Mediator of RNA polymerase II transcription subunit 30 OS=Homo sapiens GN=MED30 PE=1 SV=1                        | MED30_HUMAN | 20 kDa  | 0 | 1 | 1 | 0 |
| Heterogeneous nuclear ribonucleoprotein Q OS=Homo sapiens GN=SYNCRIP PE=1 SV=2                                   | HNRPQ_HUMAN | 70 kDa  | 0 | 0 | 1 | 0 |
| Transmembrane protein 121 OS=Homo sapiens GN=TMEM121 PE=2 SV=1                                                   | TM121_HUMAN | 36 kDa  | 0 | 0 | 1 | 0 |
| Occludin OS=Homo sapiens GN=OCLN PE=1 SV=1                                                                       | OCLN_HUMAN  | 59 kDa  | 0 | 0 | 0 | 1 |
| UPF0688 protein C1orf174 OS=Homo sapiens GN=C1orf174 PE=1 SV=2                                                   | CA174_HUMAN | 26 kDa  | 0 | 0 | 0 | 1 |
| Rho GTPase-activating protein 9 OS=Homo sapiens GN=ARHGAP9 PE=1 SV=2                                             | RHG09_HUMAN | 83 kDa  | 0 | 0 | 0 | 1 |
| IQ domain-containing protein G OS=Homo sapiens GN=IQCG PE=2 SV=1                                                 | IQCG_HUMAN  | 52 kDa  | 0 | 0 | 1 | 0 |
| Paralemmin-2 OS=Homo sapiens GN=PALM2 PE=1 SV=3                                                                  | PALM2_HUMAN | 42 kDa  | 0 | 1 | 1 | 0 |
| Nitric oxide-associated protein 1 OS=Homo sapiens GN=NOA1 PE=1 SV=2                                              | NOA1_HUMAN  | 78 kDa  | 0 | 0 | 1 | 0 |
| Ankyrin repeat domain-containing protein 30B OS=Homo sapiens GN=ANKRD30B PE=2 SV=3                               | AN30B_HUMAN | 158 kDa | 0 | 1 | 1 | 0 |
| RNA-binding protein MEX3A OS=Homo sapiens GN=MEX3A PE=1 SV=1                                                     | MEX3A_HUMAN | 54 kDa  | 0 | 0 | 0 | 1 |
| Solute carrier family 43 member 3 OS=Homo sapiens GN=SLC43A3 PE=1 SV=2                                           | S43A3_HUMAN | 55 kDa  | 0 | 0 | 1 | 0 |
| Transmembrane protein 196 OS=Homo sapiens GN=TMEM196 PE=2 SV=2                                                   | TM196_HUMAN | 19 kDa  | 0 | 0 | 1 | 0 |
| Adenylate cyclase type 9 OS=Homo sapiens GN=ADCY9 PE=1 SV=4                                                      | ADCY9_HUMAN | 151 kDa | 0 | 1 | 0 | 0 |
| Peroxisomal multifunctional enzyme type 2 OS=Homo sapiens GN=HSD17B4 PE=1 SV=3                                   | DHB4_HUMAN  | 80 kDa  | 0 | 0 | 1 | 0 |
| Nuclear receptor-binding factor 2 OS=Homo sapiens GN=NRBF2 PE=1 SV=1                                             | NRBF2_HUMAN | 32 kDa  | 0 | 0 | 0 | 1 |
| Solute carrier family 2, facilitated glucose transporter member 1 OS=Homo sapiens GN=SLC2A1 PE=1 SV=2            | GTR1_HUMAN  | 54 kDa  | 0 | 0 | 0 | 1 |
| Mas-related G-protein coupled receptor member G OS=Homo sapiens GN=MRGPRG PE=2 SV=2                              | MRGRG_HUMAN | 32 kDa  | 0 | 0 | 1 | 0 |
| Methyltransferase-like protein 17, mitochondrial OS=Homo sapiens GN=METTL17 PE=1 SV=1                            | MET17_HUMAN | 51 kDa  | 0 | 0 | 1 | 0 |
| ATP-dependent RNA helicase DDX50 OS=Homo sapiens GN=DDX50 PE=1 SV=1                                              | DDX50_HUMAN | 83 kDa  | 0 | 0 | 0 | 1 |
| Coiled-coil domain-containing protein 108 OS=Homo sapiens GN=CCDC108 PE=2 SV=2                                   | CC108_HUMAN | 217 kDa | 0 | 0 | 1 | 0 |
| cGMP-specific 3',5'-cyclic phosphodiesterase OS=Homo sapiens GN=PDE5A PE=1 SV=2                                  | PDE5A_HUMAN | 100 kDa | 0 | 0 | 1 | 0 |
| Transmembrane protease serine 2 OS=Homo sapiens GN=TMPRSS2 PE=1 SV=3                                             | TMPS2_HUMAN | 54 kDa  | 0 | 1 | 0 | 0 |
| Lactotransferrin OS=Homo sapiens GN=LTF PE=1 SV=6                                                                | TRFL_HUMAN  | 78 kDa  | 0 | 1 | 0 | 0 |
| 24-hydroxycholesterol 7-alpha-hydroxylase OS=Homo sapiens GN=CYP39A1 PE=2 SV=2                                   | CP39A_HUMAN | 54 kDa  | 0 | 0 | 1 | 0 |
| Protein FAM92B OS=Homo sapiens GN=FAM92B PE=2 SV=1                                                               | FA92B_HUMAN | 35 kDa  | 0 | 1 | 0 | 0 |
| Leukocyte receptor cluster member 9 OS=Homo sapiens GN=LENG9 PE=2 SV=2                                           | LENG9_HUMAN | 53 kDa  | 0 | 1 | 0 | 0 |
| Neuropeptide Y receptor type 5 OS=Homo sapiens GN=NPY5R PE=2 SV=2                                                | NPY5R_HUMAN | 51 kDa  | 0 | 1 | 0 | 0 |
| Importin subunit alpha-6 OS=Homo sapiens GN=KPNA5 PE=1 SV=2                                                      | IMA5_HUMAN  | 60 kDa  | 0 | 1 | 0 | 0 |
| Rab11 family-interacting protein 2 OS=Homo sapiens GN=RAB11FIP2 PE=1 SV=1                                        | RFIP2_HUMAN | 58 kDa  | 0 | 0 | 1 | 0 |
| Signal-transducing adaptor protein 2 OS=Homo sapiens GN=STAP2 PE=1 SV=2                                          | STAP2_HUMAN | 45 kDa  | 0 | 1 | 0 | 0 |
| 7SK snRNA methylphosphate capping enzyme OS=Homo sapiens GN=MEPCE PE=1 SV=1                                      | MEPCE_HUMAN | 74 kDa  | 0 | 0 | 0 | 1 |
| Zinc finger BED domain-containing protein 4 OS=Homo sapiens GN=ZBED4 PE=1 SV=2                                   | ZBED4_HUMAN | 130 kDa | 0 | 1 | 0 | 0 |
| Cadherin-5 OS=Homo sapiens GN=CDH5 PE=1 SV=5                                                                     | CADH5_HUMAN | 88 kDa  | 0 | 0 | 1 | 0 |
| Olfactory receptor 2AE1 OS=Homo sapiens GN=OR2AE1 PE=2 SV=1                                                      | O2AE1_HUMAN | 37 kDa  | 0 | 0 | 1 | 0 |
| Galectin-3 OS=Homo sapiens GN=LGALS3 PE=1 SV=5                                                                   | LEG3_HUMAN  | 26 kDa  | 0 | 0 | 0 | 1 |
| Cullin-4A OS=Homo sapiens GN=CUL4A PE=1 SV=3                                                                     | CUL4A_HUMAN | 88 kDa  | 0 | 0 | 1 | 0 |
| Estrogen-related receptor gamma OS=Homo sapiens GN=ESRRG PE=1 SV=1                                               | ERR3_HUMAN  | 51 kDa  | 0 | 0 | 1 | 0 |
| BRISC complex subunit Abro1 OS=Homo sapiens GN=FAM175B PE=1 SV=2                                                 | F175B_HUMAN | 47 kDa  | 0 | 1 | 0 | 0 |
| 43 kDa receptor-associated protein of the synapse OS=Homo sapiens GN=RAPSN PE=1 SV=4                             | RAPSN_HUMAN | 46 kDa  | 0 | 1 | 0 | 0 |
| G protein-regulated inducer of neurite outgrowth 1 OS=Homo sapiens GN=GPRIN1 PE=1 SV=2                           | GRIN1_HUMAN | 102 kDa | 0 | 0 | 1 | 0 |
| DNA replication licensing factor MCM7 OS=Homo sapiens GN=MCM7 PE=1 SV=4                                          | MCM7_HUMAN  | 81 kDa  | 0 | 0 | 1 | 0 |
| 26S protease regulatory subunit 4 OS=Homo sapiens GN=PSMC1 PE=1 SV=1                                             | PRS4_HUMAN  | 49 kDa  | 0 | 0 | 1 | 0 |
| Heterochromatin protein 1-binding protein 3 OS=Homo sapiens GN=HP1BP3 PE=1 SV=1                                  | HP1B3_HUMAN | 61 kDa  | 0 | 0 | 1 | 0 |
| Heterogeneous nuclear ribonucleoprotein R OS=Homo sapiens GN=HNRNPR PE=1 SV=1                                    | HNRPR_HUMAN | 71 kDa  | 0 | 0 | 0 | 1 |
| Dihydropyrimidinase-related protein 1 OS=Homo sapiens GN=CRMP1 PE=1 SV=1                                         | DPYL1_HUMAN | 62 kDa  | 0 | 0 | 1 | 0 |
| Myotubularin-related protein 11 OS=Homo sapiens GN=MTMR11 PE=2 SV=2                                              | MTMRB_HUMAN | 80 kDa  | 0 | 0 | 1 | 0 |
| Kelch domain-containing protein 8B OS=Homo sapiens GN=KLHDC8B PE=2 SV=1                                          | KLD8B_HUMAN | 38 kDa  | 0 | 0 | 0 | 1 |
| Proactivator polypeptide-like 1 OS=Homo sapiens GN=PSAPL1 PE=2 SV=2                                              | SAPL1_HUMAN | 57 kDa  | 0 | 0 | 1 | 0 |
| Transgelin-2 OS=Homo sapiens GN=TAGLN2 PE=1 SV=3                                                                 | TAGL2_HUMAN | 22 kDa  | 0 | 0 | 0 | 1 |
| T-box transcription factor TBX1 OS=Homo sapiens GN=TBX1 PE=1 SV=1                                                | TBX1_HUMAN  | 43 kDa  | 0 | 0 | 1 | 0 |

|                                                                                                                                              |             |         |   |   |   |   |
|----------------------------------------------------------------------------------------------------------------------------------------------|-------------|---------|---|---|---|---|
| Uncharacterized protein C1orf114 OS=Homo sapiens GN=C1orf114 PE=2 SV=1                                                                       | CA114_HUMAN | 60 kDa  | 0 | 0 | 1 | 0 |
| Aldo-keto reductase family 1 member C1 OS=Homo sapiens GN=AKR1C1 PE=1 SV=1                                                                   | AK1C1_HUMAN | 37 kDa  | 0 | 0 | 1 | 0 |
| Guanine nucleotide exchange factor VAV2 OS=Homo sapiens GN=VAV2 PE=1 SV=2                                                                    | VAV2_HUMAN  | 101 kDa | 0 | 0 | 1 | 0 |
| Phostensin OS=Homo sapiens GN=PPP1R18 PE=1 SV=1                                                                                              | PPR18_HUMAN | 68 kDa  | 0 | 0 | 0 | 1 |
| DmX-like protein 1 OS=Homo sapiens GN=DMXL1 PE=1 SV=3                                                                                        | DMXL1_HUMAN | 338 kDa | 0 | 1 | 0 | 0 |
| Uncharacterized protein C4orf29 OS=Homo sapiens GN=C4orf29 PE=1 SV=1                                                                         | CD029_HUMAN | 47 kDa  | 0 | 0 | 0 | 1 |
| NEDD8-activating enzyme E1 regulatory subunit OS=Homo sapiens GN=NAE1 PE=1 SV=1                                                              | ULA1_HUMAN  | 60 kDa  | 0 | 1 | 0 | 0 |
| Homogentisate 1,2-dioxygenase OS=Homo sapiens GN=HGD PE=1 SV=2                                                                               | HGD_HUMAN   | 50 kDa  | 0 | 1 | 0 | 0 |
| Tubulin polymerization-promoting protein family member 3 OS=Homo sapiens GN=TPPP3 PE=1 SV=1                                                  | TPPP3_HUMAN | 19 kDa  | 0 | 1 | 0 | 0 |
| Testican-1 OS=Homo sapiens GN=SPOCK1 PE=1 SV=1                                                                                               | TICN1_HUMAN | 49 kDa  | 0 | 1 | 0 | 0 |
| UAP56-interacting factor OS=Homo sapiens GN=FYT1D1 PE=1 SV=3                                                                                 | UIF_HUMAN   | 36 kDa  | 0 | 0 | 0 | 1 |
| RING finger protein C14orf164 OS=Homo sapiens GN=C14orf164 PE=2 SV=1                                                                         | CN164_HUMAN | 34 kDa  | 0 | 0 | 1 | 0 |
| Developmental pluripotency-associated protein 4 OS=Homo sapiens GN=DPPA4 PE=1 SV=2                                                           | DPPA4_HUMAN | 34 kDa  | 0 | 0 | 1 | 0 |
| B-cell lymphoma/leukemia 11B OS=Homo sapiens GN=BCL11B PE=1 SV=1                                                                             | BC11B_HUMAN | 96 kDa  | 0 | 0 | 0 | 1 |
| Unconventional myosin-If OS=Homo sapiens GN=MYO1F PE=1 SV=3                                                                                  | MYO1F_HUMAN | 125 kDa | 0 | 0 | 0 | 1 |
| Myb/SANT-like DNA-binding domain-containing protein 4 OS=Homo sapiens GN=MSANTD4 PE=1 SV=1                                                   | MSD4_HUMAN  | 41 kDa  | 0 | 0 | 1 | 0 |
| Proteasome subunit beta type-9 OS=Homo sapiens GN=PSMB9 PE=1 SV=2                                                                            | PSB9_HUMAN  | 23 kDa  | 0 | 1 | 0 | 0 |
| Zinc finger and SCAN domain-containing protein 12 OS=Homo sapiens GN=ZSCAN12 PE=2 SV=1                                                       | ZSC12_HUMAN | 70 kDa  | 0 | 1 | 0 | 0 |
| Zinc finger protein 74 OS=Homo sapiens GN=ZNF74 PE=2 SV=3                                                                                    | ZNF74_HUMAN | 72 kDa  | 0 | 1 | 0 | 0 |
| Peroxisomal membrane protein 11A OS=Homo sapiens GN=PEX11A PE=1 SV=1                                                                         | PX11A_HUMAN | 28 kDa  | 0 | 0 | 1 | 0 |
| Breast cancer metastasis-suppressor 1 OS=Homo sapiens GN=BRMS1 PE=1 SV=1                                                                     | BRMS1_HUMAN | 28 kDa  | 0 | 0 | 0 | 1 |
| Carbonyl reductase [NADPH] 1 OS=Homo sapiens GN=CBR1 PE=1 SV=3                                                                               | CBR1_HUMAN  | 30 kDa  | 0 | 0 | 1 | 0 |
| Kinetochore-associated protein DSN1 homolog OS=Homo sapiens GN=DSN1 PE=1 SV=2                                                                | DSN1_HUMAN  | 40 kDa  | 0 | 0 | 1 | 0 |
| Beta-1 adrenergic receptor OS=Homo sapiens GN=ADRB1 PE=1 SV=2                                                                                | ADRB1_HUMAN | 51 kDa  | 0 | 1 | 0 | 0 |
| 5'-nucleotidase OS=Homo sapiens GN=NT5E PE=1 SV=1                                                                                            | 5NTD_HUMAN  | 63 kDa  | 0 | 0 | 1 | 0 |
| Zinc finger protein 643 OS=Homo sapiens GN=ZNF643 PE=2 SV=2                                                                                  | ZN643_HUMAN | 61 kDa  | 0 | 0 | 1 | 0 |
| E3 ubiquitin-protein ligase RNF187 OS=Homo sapiens GN=RNF187 PE=1 SV=2                                                                       | RN187_HUMAN | 26 kDa  | 0 | 0 | 0 | 1 |
| Lysophosphatidylcholine acyltransferase 1 OS=Homo sapiens GN=LPCAT1 PE=1 SV=2                                                                | PCAT1_HUMAN | 59 kDa  | 0 | 0 | 0 | 1 |
| MAGE-like protein 2 OS=Homo sapiens GN=MAGEL2 PE=1 SV=1                                                                                      | MAGL2_HUMAN | 59 kDa  | 0 | 1 | 0 | 0 |
| Uncharacterized protein C1orf87 OS=Homo sapiens GN=C1orf87 PE=2 SV=1                                                                         | CA087_HUMAN | 62 kDa  | 0 | 0 | 0 | 1 |
| Complement factor I OS=Homo sapiens GN=CFI PE=1 SV=2                                                                                         | CFAI_HUMAN  | 66 kDa  | 0 | 0 | 0 | 1 |
| Receptor tyrosine-protein kinase erbB-4 OS=Homo sapiens GN=ERBB4 PE=1 SV=1                                                                   | ERBB4_HUMAN | 147 kDa | 0 | 1 | 0 | 0 |
| T-box transcription factor TBX3 OS=Homo sapiens GN=TBX3 PE=1 SV=4                                                                            | TBX3_HUMAN  | 79 kDa  | 0 | 0 | 1 | 0 |
| DNA polymerase kappa OS=Homo sapiens GN=POLK PE=1 SV=1                                                                                       | POLK_HUMAN  | 99 kDa  | 0 | 1 | 0 | 0 |
| Glycylpeptide N-tetradecanoyltransferase 2 OS=Homo sapiens GN=NMT2 PE=1 SV=1                                                                 | NMT2_HUMAN  | 57 kDa  | 0 | 0 | 1 | 0 |
| CD44 antigen OS=Homo sapiens GN=CD44 PE=1 SV=3                                                                                               | CD44_HUMAN  | 82 kDa  | 0 | 0 | 1 | 0 |
| Suppression of tumorigenicity 5 protein OS=Homo sapiens GN=ST5 PE=1 SV=3                                                                     | ST5_HUMAN   | 126 kDa | 0 | 0 | 0 | 1 |
| Chromodomain-helicase-DNA-binding protein 8 OS=Homo sapiens GN=CHD8 PE=1 SV=5                                                                | CHD8_HUMAN  | 291 kDa | 0 | 0 | 0 | 1 |
| Olfactory receptor 2K2 OS=Homo sapiens GN=OR2K2 PE=2 SV=2                                                                                    | OR2K2_HUMAN | 38 kDa  | 0 | 0 | 1 | 0 |
| Crossover junction endonuclease EME1 OS=Homo sapiens GN=EME1 PE=1 SV=2                                                                       | EME1_HUMAN  | 63 kDa  | 0 | 0 | 1 | 0 |
| Protein-associating with the carboxyl-terminal domain of ezrin OS=Homo sapiens GN=SCYL3 PE=1 SV=3                                            | PACE1_HUMAN | 83 kDa  | 0 | 0 | 1 | 0 |
| HERV-V_19q13.41 provirus ancestral Env polyprotein 1 OS=Homo sapiens GN=ERVV1 PE=2 SV=1                                                      | ERVV1_HUMAN | 53 kDa  | 0 | 1 | 0 | 0 |
| Adenylate cyclase type 4 OS=Homo sapiens GN=ADCY4 PE=1 SV=1                                                                                  | ADCY4_HUMAN | 120 kDa | 0 | 0 | 1 | 0 |
| Lipoamide acyltransferase component of branched-chain alpha-keto acid dehydrogenase complex, mitochondrion OS=Homo sapiens GN=OBD2 PE=1 SV=2 | ODB2_HUMAN  | 53 kDa  | 0 | 1 | 0 | 0 |
| Pleckstrin homology-like domain family A member 2 OS=Homo sapiens GN=PHLA2 PE=1 SV=2                                                         | PHLA2_HUMAN | 17 kDa  | 0 | 0 | 1 | 0 |
| Myocardin OS=Homo sapiens GN=MYOCD PE=1 SV=1                                                                                                 | MYCD_HUMAN  | 102 kDa | 0 | 1 | 0 | 0 |
| E3 ubiquitin-protein ligase NRD1 OS=Homo sapiens GN=RN41 PE=1 SV=2                                                                           | RNF41_HUMAN | 36 kDa  | 0 | 1 | 0 | 0 |
| Putative 40S ribosomal protein S10-like OS=Homo sapiens GN=RPS10P5 PE=5 SV=1                                                                 | RS10L_HUMAN | 20 kDa  | 0 | 1 | 0 | 0 |
| Protein FAM200A OS=Homo sapiens GN=FAM200A PE=2 SV=1                                                                                         | F200A_HUMAN | 66 kDa  | 0 | 0 | 1 | 0 |
| Frizzled-6 OS=Homo sapiens GN=FZD6 PE=1 SV=2                                                                                                 | FZD6_HUMAN  | 79 kDa  | 0 | 1 | 0 | 0 |
| Long-chain specific acyl-CoA dehydrogenase, mitochondrial OS=Homo sapiens GN=ACADL PE=2 SV=2                                                 | ACADL_HUMAN | 48 kDa  | 0 | 0 | 0 | 1 |
| Complement factor B OS=Homo sapiens GN=CFB PE=1 SV=2                                                                                         | CFAB_HUMAN  | 86 kDa  | 0 | 0 | 0 | 1 |
| CD97 antigen OS=Homo sapiens GN=CD97 PE=1 SV=4                                                                                               | CD97_HUMAN  | 92 kDa  | 0 | 0 | 1 | 0 |
| Coatomeyer subunit gamma-1 OS=Homo sapiens GN=COPG1 PE=1 SV=1                                                                                | COPG1_HUMAN | 98 kDa  | 0 | 0 | 1 | 0 |
| Pseudouridine-5'-monophosphatase OS=Homo sapiens GN=HDHD1 PE=1 SV=3                                                                          | HDHD1_HUMAN | 25 kDa  | 0 | 1 | 0 | 0 |
| Proto-oncogene vav OS=Homo sapiens GN=VAV1 PE=1 SV=4                                                                                         | VAV_HUMAN   | 98 kDa  | 0 | 0 | 1 | 0 |
| Guanine nucleotide exchange factor MSS4 OS=Homo sapiens GN=RABIF PE=1 SV=2                                                                   | MSS4_HUMAN  | 14 kDa  | 0 | 0 | 0 | 1 |
| Ubiquitin-conjugating enzyme E2 J1 OS=Homo sapiens GN=UBE2J1 PE=1 SV=2                                                                       | UB2J1_HUMAN | 35 kDa  | 0 | 1 | 0 | 0 |
| Peripherin OS=Homo sapiens GN=PRPH PE=1 SV=2                                                                                                 | PERI_HUMAN  | 54 kDa  | 0 | 0 | 1 | 0 |
| Thioredoxin-dependent peroxide reductase, mitochondrial OS=Homo sapiens GN=PRDX3 PE=1 SV=3                                                   | PRDX3_HUMAN | 28 kDa  | 0 | 0 | 0 | 1 |
| B-cell CLL/lymphoma 9 protein OS=Homo sapiens GN=BCL9 PE=1 SV=4                                                                              | BCL9_HUMAN  | 149 kDa | 0 | 1 | 0 | 0 |
| WD repeat-containing protein 67 OS=Homo sapiens GN=WDR67 PE=2 SV=2                                                                           | WDR67_HUMAN | 124 kDa | 0 | 0 | 0 | 1 |
| 60S ribosomal protein L23a OS=Homo sapiens GN=RPL23A PE=1 SV=1                                                                               | RL23A_HUMAN | 18 kDa  | 0 | 1 | 0 | 0 |
| Potassium/sodium hyperpolarization-activated cyclic nucleotide-gated channel 3 OS=Homo sapiens GN=HCN3 PE=1 SV=1                             | HCN3_HUMAN  | 86 kDa  | 0 | 0 | 1 | 0 |
| Adenylate cyclase type 8 OS=Homo sapiens GN=ADCY8 PE=1 SV=1                                                                                  | ADCY8_HUMAN | 140 kDa | 0 | 0 | 1 | 0 |
| Myelin transcription factor 1-like protein OS=Homo sapiens GN=MYT1L PE=2 SV=3                                                                | MYT1L_HUMAN | 133 kDa | 0 | 0 | 1 | 0 |
| DAZ-associated protein 1 OS=Homo sapiens GN=DAZAP1 PE=1 SV=1                                                                                 | DAZP1_HUMAN | 43 kDa  | 0 | 0 | 1 | 0 |
| PHD finger protein 1 OS=Homo sapiens GN=PHF1 PE=1 SV=3                                                                                       | PHF1_HUMAN  | 62 kDa  | 0 | 1 | 0 | 0 |
| NADH dehydrogenase [ubiquinone] 1 alpha subcomplex subunit 9, mitochondrial OS=Homo sapiens GN=NDUA9 PE=1 SV=1                               | NDUA9_HUMAN | 43 kDa  | 0 | 0 | 1 | 0 |
| Protein kinase C-binding protein 1 OS=Homo sapiens GN=ZMYND8 PE=1 SV=2                                                                       | PKCB1_HUMAN | 132 kDa | 0 | 1 | 0 | 0 |
| Probable palmitoyltransferase ZDHHC16 OS=Homo sapiens GN=ZDHHC16 PE=2 SV=1                                                                   | ZDH16_HUMAN | 44 kDa  | 0 | 0 | 0 | 1 |
| Histone-lysine N-methyltransferase, H3 lysine-79 specific OS=Homo sapiens GN=DOT1L PE=1 SV=2                                                 | DOT1L_HUMAN | 185 kDa | 0 | 0 | 0 | 1 |
| Lysyl oxidase homolog 4 OS=Homo sapiens GN=LOXL4 PE=1 SV=1                                                                                   | LOXL4_HUMAN | 84 kDa  | 0 | 0 | 0 | 1 |
| Zinc finger protein 106 homolog OS=Homo sapiens GN=ZFP106 PE=1 SV=1                                                                          | ZF106_HUMAN | 209 kDa | 0 | 1 | 0 | 0 |
| Serine/threonine-protein kinase LATS2 OS=Homo sapiens GN=LATS2 PE=1 SV=2                                                                     | LATS2_HUMAN | 120 kDa | 0 | 0 | 1 | 0 |
| Semaphorin-6A OS=Homo sapiens GN=SEMA6A PE=1 SV=2                                                                                            | SEM6A_HUMAN | 114 kDa | 0 | 0 | 1 | 0 |
| BRI3-binding protein OS=Homo sapiens GN=BRI3BP PE=1 SV=1                                                                                     | BRI3B_HUMAN | 28 kDa  | 0 | 0 | 1 | 0 |
| Protein kinase C epsilon type OS=Homo sapiens GN=PRKCE PE=1 SV=1                                                                             | KPCE_HUMAN  | 84 kDa  | 0 | 1 | 0 | 0 |
| Ig gamma-2 chain C region OS=Homo sapiens GN=IGHG2 PE=1 SV=2                                                                                 | IGHG2_HUMAN | 36 kDa  | 0 | 0 | 2 | 0 |
| Dimethylaniline monooxygenase [N-oxide-forming] 5 OS=Homo sapiens GN=FMO5 PE=2 SV=2                                                          | FMO5_HUMAN  | 60 kDa  | 0 | 0 | 0 | 2 |
| Leucine-rich repeat-containing G-protein coupled receptor 5 OS=Homo sapiens GN=LGR5 PE=2 SV=1                                                | LGR5_HUMAN  | 100 kDa | 0 | 0 | 2 | 0 |
| Collagen alpha-1(II) chain OS=Homo sapiens GN=COL2A1 PE=1 SV=3                                                                               | CO2A1_HUMAN | 142 kDa | 0 | 0 | 2 | 0 |

|                                                                                                      |             |         |   |   |   |   |
|------------------------------------------------------------------------------------------------------|-------------|---------|---|---|---|---|
| Uncharacterized protein C17orf85 OS=Homo sapiens GN=C17orf85 PE=1 SV=2                               | CQ085_HUMAN | 71 kDa  | 0 | 0 | 1 | 0 |
| RanBP2-like and GRIP domain-containing protein 3 OS=Homo sapiens GN=RGPD3 PE=2 SV=2                  | RGPD3_HUMAN | 197 kDa | 0 | 0 | 1 | 0 |
| Collagen alpha-1(VI) chain OS=Homo sapiens GN=COL6A1 PE=1 SV=3                                       | CO6A1_HUMAN | 109 kDa | 0 | 0 | 1 | 0 |
| Aminoacyl tRNA synthase complex-interacting multifunctional protein 2 OS=Homo sapiens GN=AIMP2 PE=   | AIMP2_HUMAN | 35 kDa  | 0 | 0 | 1 | 0 |
| Zinc finger protein 426 OS=Homo sapiens GN=ZNF426 PE=2 SV=1                                          | ZN426_HUMAN | 63 kDa  | 0 | 0 | 1 | 0 |
| Aspartate--tRNA ligase, cytoplasmic OS=Homo sapiens GN=DARS PE=1 SV=2                                | SYDC_HUMAN  | 57 kDa  | 0 | 0 | 1 | 0 |
| Sodium/glucose cotransporter 2 OS=Homo sapiens GN=SLC5A2 PE=1 SV=1                                   | SC5A2_HUMAN | 73 kDa  | 0 | 0 | 1 | 0 |
| Kinesin-like protein KIF18A OS=Homo sapiens GN=KIF18A PE=1 SV=2                                      | KI18A_HUMAN | 102 kDa | 0 | 1 | 0 | 0 |
| Exostosin-like 3 OS=Homo sapiens GN=EXTL3 PE=2 SV=1                                                  | EXTL3_HUMAN | 105 kDa | 0 | 0 | 1 | 0 |
| Carbohydrate-responsive element-binding protein OS=Homo sapiens GN=MLXPL PE=1 SV=1                   | MLXPL_HUMAN | 93 kDa  | 0 | 1 | 0 | 0 |
| Coiled-coil domain-containing protein 11 OS=Homo sapiens GN=CCDC11 PE=2 SV=2                         | CCD11_HUMAN | 62 kDa  | 0 | 0 | 1 | 0 |
| Calcium-binding and spermatid-specific protein 1 OS=Homo sapiens GN=CABS1 PE=2 SV=3                  | CABS1_HUMAN | 43 kDa  | 0 | 0 | 1 | 0 |
| Structure-specific endonuclease subunit SLX4 OS=Homo sapiens GN=SLX4 PE=1 SV=3                       | SLX4_HUMAN  | 200 kDa | 0 | 0 | 0 | 1 |
| UNC93-like protein MFSD11 OS=Homo sapiens GN=MFSD11 PE=2 SV=2                                        | MFS11_HUMAN | 49 kDa  | 0 | 0 | 1 | 0 |
| Dipeptidase 3 OS=Homo sapiens GN=DPEP3 PE=2 SV=2                                                     | DPEP3_HUMAN | 54 kDa  | 0 | 0 | 1 | 0 |
| RNA polymerase II subunit A C-terminal domain phosphatase SSU72 OS=Homo sapiens GN=SSU72 PE=1 SV=1   | SSU72_HUMAN | 23 kDa  | 0 | 1 | 0 | 0 |
| Adenosine kinase OS=Homo sapiens GN=ADK PE=1 SV=2                                                    | ADK_HUMAN   | 41 kDa  | 0 | 1 | 0 | 0 |
| Tetraspanin-33 OS=Homo sapiens GN=TSPAN33 PE=2 SV=1                                                  | TSN33_HUMAN | 32 kDa  | 0 | 0 | 1 | 0 |
| Protein RUFY3 OS=Homo sapiens GN=RUFY3 PE=1 SV=1                                                     | RUFY3_HUMAN | 53 kDa  | 0 | 0 | 1 | 0 |
| Uncharacterized protein C9orf135 OS=Homo sapiens GN=C9orf135 PE=1 SV=1                               | CI135_HUMAN | 26 kDa  | 0 | 0 | 1 | 0 |
| Pleckstrin homology domain-containing family D member 1 OS=Homo sapiens GN=PLEKHD1 PE=2 SV=3         | PLHD1_HUMAN | 59 kDa  | 0 | 0 | 0 | 1 |
| Kremen protein 2 OS=Homo sapiens GN=KREMEN2 PE=2 SV=1                                                | KREM2_HUMAN | 49 kDa  | 0 | 0 | 1 | 0 |
| Transcription factor IIIB 50 kDa subunit OS=Homo sapiens GN=BRF2 PE=1 SV=1                           | BRF2_HUMAN  | 47 kDa  | 0 | 0 | 1 | 0 |
| Zinc finger protein 536 OS=Homo sapiens GN=ZNF536 PE=1 SV=3                                          | ZN536_HUMAN | 141 kDa | 0 | 0 | 1 | 0 |
| Ankyrin repeat and death domain-containing protein 1A OS=Homo sapiens GN=ANKDD1A PE=2 SV=2           | AKD1A_HUMAN | 58 kDa  | 0 | 1 | 0 | 0 |
| Cytosolic carboxypeptidase 4 OS=Homo sapiens GN=AGBL1 PE=2 SV=2                                      | CBPC4_HUMAN | 120 kDa | 0 | 0 | 0 | 1 |
| Chordin OS=Homo sapiens GN=CHRD PE=1 SV=2                                                            | CHRD_HUMAN  | 102 kDa | 0 | 0 | 0 | 1 |
| Cleavage stimulation factor subunit 2 OS=Homo sapiens GN=CSTF2 PE=1 SV=1                             | CSTF2_HUMAN | 61 kDa  | 0 | 0 | 0 | 1 |
| Gap junction beta-2 protein OS=Homo sapiens GN=GJB2 PE=1 SV=3                                        | CXB2_HUMAN  | 26 kDa  | 0 | 0 | 0 | 1 |
| DCN1-like protein 4 OS=Homo sapiens GN=DCUN1D4 PE=1 SV=2                                             | DCNL4_HUMAN | 34 kDa  | 0 | 0 | 0 | 1 |
| Dematin OS=Homo sapiens GN=EPB49 PE=1 SV=3                                                           | DEMA_HUMAN  | 46 kDa  | 0 | 0 | 0 | 1 |
| DnaJ homolog subfamily A member 2 OS=Homo sapiens GN=DNAJA2 PE=1 SV=1                                | DNJA2_HUMAN | 46 kDa  | 0 | 0 | 0 | 1 |
| DnaJ homolog subfamily C member 8 OS=Homo sapiens GN=DNAJC8 PE=1 SV=2                                | DNJC8_HUMAN | 30 kDa  | 0 | 0 | 0 | 1 |
| Double C2-like domain-containing protein alpha OS=Homo sapiens GN=DOC2A PE=1 SV=5                    | DOC2A_HUMAN | 44 kDa  | 0 | 0 | 0 | 1 |
| Eukaryotic translation initiation factor 2-alpha kinase 4 OS=Homo sapiens GN=EIF2AK4 PE=1 SV=3       | E2AK4_HUMAN | 187 kDa | 0 | 0 | 0 | 1 |
| Enhancer of mRNA-decapping protein 4 OS=Homo sapiens GN=EDC4 PE=1 SV=1                               | EDC4_HUMAN  | 152 kDa | 0 | 0 | 0 | 1 |
| Heat shock protein beta-1 OS=Homo sapiens GN=HSPB1 PE=1 SV=2                                         | HSPB1_HUMAN | 23 kDa  | 0 | 0 | 0 | 1 |
| Keratin-associated protein 4-7 OS=Homo sapiens GN=KRTAP4-7 PE=2 SV=2                                 | KRA47_HUMAN | 23 kDa  | 0 | 0 | 0 | 1 |
| L-lactate dehydrogenase A-like 6A OS=Homo sapiens GN=LDHAL6A PE=2 SV=1                               | LDH6A_HUMAN | 37 kDa  | 0 | 0 | 0 | 1 |
| Nck-associated protein 1 OS=Homo sapiens GN=NCKAP1 PE=1 SV=1                                         | NCKP1_HUMAN | 129 kDa | 0 | 0 | 0 | 1 |
| Pre-B-cell leukemia transcription factor 1 OS=Homo sapiens GN=PBX1 PE=1 SV=1                         | PBX1_HUMAN  | 47 kDa  | 0 | 0 | 0 | 1 |
| Serine/threonine-protein kinase N2 OS=Homo sapiens GN=PKN2 PE=1 SV=1                                 | PKN2_HUMAN  | 112 kDa | 0 | 0 | 0 | 1 |
| 60S ribosomal protein L22 OS=Homo sapiens GN=RPL22 PE=1 SV=2                                         | RL22_HUMAN  | 15 kDa  | 0 | 0 | 0 | 1 |
| 40S ribosomal protein S19 OS=Homo sapiens GN=RPS19 PE=1 SV=2                                         | RS19_HUMAN  | 16 kDa  | 0 | 0 | 0 | 1 |
| Putative uncharacterized protein RUSC1-AS1 OS=Homo sapiens GN=RUSC1-AS1 PE=5 SV=1                    | RUAS1_HUMAN | 24 kDa  | 0 | 0 | 0 | 1 |
| Iporin OS=Homo sapiens GN=RUSC2 PE=1 SV=3                                                            | RUSC2_HUMAN | 161 kDa | 0 | 0 | 0 | 1 |
| Probable alpha-ketoglutarate-dependent dioxygenase ABH6 OS=Homo sapiens GN=ALKBH6 PE=1 SV=2          | ALKB6_HUMAN | 26 kDa  | 0 | 0 | 0 | 1 |
| Disintegrin and metalloproteinase domain-containing protein 8 OS=Homo sapiens GN=ADAM8 PE=1 SV=1     | ADAM8_HUMAN | 89 kDa  | 0 | 1 | 0 | 0 |
| Putative neutral ceramidase C OS=Homo sapiens GN=ASAH2C PE=2 SV=1                                    | ASA2C_HUMAN | 69 kDa  | 0 | 1 | 0 | 0 |
| Cell division cycle-associated 7-like protein OS=Homo sapiens GN=CDCA7L PE=1 SV=2                    | CDA7L_HUMAN | 52 kDa  | 0 | 1 | 0 | 0 |
| Deformed epidermal autoregulatory factor 1 homolog OS=Homo sapiens GN=DEAF1 PE=1 SV=1                | DEAF1_HUMAN | 59 kDa  | 0 | 1 | 0 | 0 |
| Envoplakin-like protein OS=Homo sapiens GN=EVPLL PE=2 SV=1                                           | EVPLL_HUMAN | 34 kDa  | 0 | 1 | 0 | 0 |
| Eukaryotic translation initiation factor 2 subunit 1 OS=Homo sapiens GN=EIF2S1 PE=1 SV=3             | IF2A_HUMAN  | 36 kDa  | 0 | 1 | 0 | 0 |
| Uncharacterized protein KIAA0087 OS=Homo sapiens GN=KIAA0087 PE=1 SV=1                               | K0087_HUMAN | 15 kDa  | 0 | 1 | 0 | 0 |
| cAMP-dependent protein kinase type I-alpha regulatory subunit OS=Homo sapiens GN=PRKAR1A PE=1 SV=    | KAP0_HUMAN  | 43 kDa  | 0 | 1 | 0 | 0 |
| Potassium channel subfamily T member 2 OS=Homo sapiens GN=KCNT2 PE=1 SV=1                            | KCNT2_HUMAN | 131 kDa | 0 | 1 | 0 | 0 |
| Leukemia-associated protein 7 OS=Homo sapiens GN=DLEU7 PE=2 SV=1                                     | LEU7_HUMAN  | 24 kDa  | 0 | 1 | 0 | 0 |
| Leucine-rich repeat and guanylate kinase domain-containing protein OS=Homo sapiens GN=LRGUK PE=1 SV= | LRGUK_HUMAN | 94 kDa  | 0 | 1 | 0 | 0 |
| N-acetylated-alpha-linked acidic dipeptidase 2 OS=Homo sapiens GN=NAALAD2 PE=1 SV=1                  | NALD2_HUMAN | 84 kDa  | 0 | 1 | 0 | 0 |
| Peptidyl-prolyl cis-trans isomerase-like 2 OS=Homo sapiens GN=PPIL2 PE=1 SV=1                        | PPIL2_HUMAN | 59 kDa  | 0 | 1 | 0 | 0 |
| DNA-binding protein RFX7 OS=Homo sapiens GN=RFX7 PE=1 SV=1                                           | RFX7_HUMAN  | 147 kDa | 0 | 1 | 0 | 0 |
| RNA (guanine-9-)-methyltransferase domain-containing protein 3 OS=Homo sapiens GN=RG9MTD3 PE=2 SV=   | RG9D3_HUMAN | 36 kDa  | 0 | 1 | 0 | 0 |
| U2 small nuclear ribonucleoprotein A' OS=Homo sapiens GN=SNRPA1 PE=1 SV=2                            | RU2A_HUMAN  | 28 kDa  | 0 | 1 | 0 | 0 |
| Solute carrier family 22 member 11 OS=Homo sapiens GN=SLC22A11 PE=1 SV=1                             | S22A8_HUMAN | 60 kDa  | 0 | 1 | 0 | 0 |
| Succinyl-CoA:3-ketoacid coenzyme A transferase 2, mitochondrial OS=Homo sapiens GN=OXCT2 PE=2 SV=    | SCOT2_HUMAN | 56 kDa  | 0 | 1 | 0 | 0 |
| T-complex protein 1 subunit zeta-2 OS=Homo sapiens GN=CCT6B PE=1 SV=5                                | TCPW_HUMAN  | 58 kDa  | 0 | 1 | 0 | 0 |
| Tuftelin OS=Homo sapiens GN=TUFT1 PE=2 SV=1                                                          | TUFT1_HUMAN | 44 kDa  | 0 | 1 | 0 | 0 |
| UDP-glucuronosyltransferase 2B4 OS=Homo sapiens GN=UGT2B4 PE=1 SV=2                                  | UD2B4_HUMAN | 61 kDa  | 0 | 1 | 0 | 0 |
| WD repeat-containing protein 25 OS=Homo sapiens GN=WDR25 PE=1 SV=3                                   | WDR25_HUMAN | 60 kDa  | 0 | 1 | 0 | 0 |
| Zinc finger CCHC domain-containing protein 2 OS=Homo sapiens GN=ZCCHC2 PE=1 SV=6                     | ZCHC2_HUMAN | 126 kDa | 0 | 1 | 0 | 0 |
| HLA class I histocompatibility antigen, B-73 alpha chain OS=Homo sapiens GN=HLA-B PE=1 SV=1          | 1B73_HUMAN  | 40 kDa  | 0 | 0 | 1 | 0 |
| ATP-binding cassette sub-family B member 6, mitochondrial OS=Homo sapiens GN=ABCB6 PE=1 SV=1         | ABCB6_HUMAN | 94 kDa  | 0 | 0 | 1 | 0 |
| Serine/threonine-protein kinase receptor R3 OS=Homo sapiens GN=ACVRL1 PE=1 SV=2                      | ACVL1_HUMAN | 56 kDa  | 0 | 0 | 1 | 0 |
| Disintegrin and metalloproteinase domain-containing protein 29 OS=Homo sapiens GN=ADAM29 PE=1 SV=    | ADA29_HUMAN | 93 kDa  | 0 | 0 | 1 | 0 |
| A-kinase anchor protein 17A OS=Homo sapiens GN=AKAP17A PE=1 SV=2                                     | AK17A_HUMAN | 81 kDa  | 0 | 0 | 1 | 0 |
| Probable dolichyl pyrophosphate Glc1Man9GlcNAc2 alpha-1,3-glucosyltransferase OS=Homo sapiens GN=    | ALG8_HUMAN  | 60 kDa  | 0 | 0 | 1 | 0 |
| Protein APCDD1-like OS=Homo sapiens GN=APCDD1L PE=2 SV=1                                             | APCDL_HUMAN | 56 kDa  | 0 | 0 | 1 | 0 |
| Aflatoxin B1 aldehyde reductase member 2 OS=Homo sapiens GN=AKR7A2 PE=1 SV=3                         | ARK72_HUMAN | 40 kDa  | 0 | 0 | 1 | 0 |
| Bcl-2-related protein A1 OS=Homo sapiens GN=BCL2A1 PE=1 SV=1                                         | B2LA1_HUMAN | 20 kDa  | 0 | 0 | 1 | 0 |
| Cadherin-12 OS=Homo sapiens GN=CDH12 PE=1 SV=2                                                       | CAD12_HUMAN | 88 kDa  | 0 | 0 | 1 | 0 |
| Chromobox protein homolog 5 OS=Homo sapiens GN=CBX5 PE=1 SV=1                                        | CBX5_HUMAN  | 22 kDa  | 0 | 0 | 1 | 0 |
| Cyclin-dependent kinase 15 OS=Homo sapiens GN=CDK15 PE=2 SV=2                                        | CDK15_HUMAN | 49 kDa  | 0 | 0 | 1 | 0 |

|                                                                                                        |              |         |   |   |   |   |
|--------------------------------------------------------------------------------------------------------|--------------|---------|---|---|---|---|
| Uncharacterized protein C16orf95 OS=Homo sapiens GN=C16orf95 PE=2 SV=1                                 | CP095_HUMAN  | 17 kDa  | 0 | 0 | 1 | 0 |
| Cytochrome P450 1A1 OS=Homo sapiens GN=CYP1A1 PE=1 SV=1                                                | CP1A1_HUMAN  | 58 kDa  | 0 | 0 | 1 | 0 |
| Calsyntenin-1 OS=Homo sapiens GN=CLSTN1 PE=1 SV=1                                                      | CSTN1_HUMAN  | 110 kDa | 0 | 0 | 1 | 0 |
| DNA-binding protein A OS=Homo sapiens GN=CSDA PE=1 SV=4                                                | DBPA_HUMAN   | 40 kDa  | 0 | 0 | 1 | 0 |
| Disrupted in schizophrenia 1 protein OS=Homo sapiens GN=DISC1 PE=1 SV=3                                | DISC1_HUMAN  | 94 kDa  | 0 | 0 | 1 | 0 |
| Protein FAM91A1 OS=Homo sapiens GN=FAM91A1 PE=1 SV=3                                                   | F91A1_HUMAN  | 94 kDa  | 0 | 0 | 1 | 0 |
| Dimethylaniline monooxygenase [N-oxide-forming] 4 OS=Homo sapiens GN=FMO4 PE=2 SV=3                    | FMO4_HUMAN   | 63 kDa  | 0 | 0 | 1 | 0 |
| Fibronectin type-III domain-containing protein 3A OS=Homo sapiens GN=FNDC3A PE=1 SV=4                  | FND3A_HUMAN  | 132 kDa | 0 | 0 | 1 | 0 |
| Fizzy-related protein homolog OS=Homo sapiens GN=FZR1 PE=1 SV=2                                        | FZR_HUMAN    | 55 kDa  | 0 | 0 | 1 | 0 |
| Beta-1,3-galactosyl-O-glycosyl-glycoprotein beta-1,6-N-acetylglucosaminyltransferase 3 OS=Homo sapiens | GCNT3_HUMAN  | 51 kDa  | 0 | 0 | 1 | 0 |
| Hydroxyacylglutathione hydrolase, mitochondrial OS=Homo sapiens GN=HAGH PE=1 SV=2                      | GLO2_HUMAN   | 34 kDa  | 0 | 0 | 1 | 0 |
| Golgi-associated PDZ and coiled-coil motif-containing protein OS=Homo sapiens GN=GOPC PE=1 SV=1        | GOPC_HUMAN   | 51 kDa  | 0 | 0 | 1 | 0 |
| Hyaluronan and proteoglycan link protein 2 OS=Homo sapiens GN=HAPLN2 PE=1 SV=1                         | HPLN2_HUMAN  | 38 kDa  | 0 | 0 | 1 | 0 |
| Interleukin-17 receptor A OS=Homo sapiens GN=IL17RA PE=1 SV=2                                          | I17RA_HUMAN  | 96 kDa  | 0 | 0 | 1 | 0 |
| Potassium voltage-gated channel subfamily B member 1 OS=Homo sapiens GN=KCNB1 PE=1 SV=2                | KCNB1_HUMAN  | 96 kDa  | 0 | 0 | 1 | 0 |
| Mitogen-activated protein kinase kinase kinase 12 OS=Homo sapiens GN=MAP3K12 PE=1 SV=2                 | M3K12_HUMAN  | 93 kDa  | 0 | 0 | 1 | 0 |
| E3 ubiquitin-protein ligase MARCH4 OS=Homo sapiens GN=MARCH4 PE=2 SV=2                                 | MARH4_HUMAN  | 46 kDa  | 0 | 0 | 1 | 0 |
| Mannose-binding protein C OS=Homo sapiens GN=MBL2 PE=1 SV=2                                            | MBL2_HUMAN   | 26 kDa  | 0 | 0 | 1 | 0 |
| MBT domain-containing protein 1 OS=Homo sapiens GN=MBTD1 PE=1 SV=2                                     | MBTD1_HUMAN  | 71 kDa  | 0 | 0 | 1 | 0 |
| Microfibrillar-associated protein 1 OS=Homo sapiens GN=MFAP1 PE=1 SV=2                                 | MFAP1_HUMAN  | 52 kDa  | 0 | 0 | 1 | 0 |
| Alpha-1,6-mannosylglycoprotein 6-beta-N-acetylglucosaminyltransferase A OS=Homo sapiens GN=MGAT5       | MGT5A_HUMAN  | 85 kDa  | 0 | 0 | 1 | 0 |
| Male-specific lethal 3 homolog OS=Homo sapiens GN=MSL3 PE=1 SV=1                                       | MS3L1_HUMAN  | 60 kDa  | 0 | 0 | 1 | 0 |
| Glutamine-dependent NAD(+) synthetase OS=Homo sapiens GN=NADSYN1 PE=1 SV=3                             | NADE_HUMAN   | 79 kDa  | 0 | 0 | 1 | 0 |
| Neurofilament light polypeptide OS=Homo sapiens GN=NEFL PE=1 SV=3                                      | NFL_HUMAN    | 62 kDa  | 0 | 0 | 1 | 0 |
| High affinity nerve growth factor receptor OS=Homo sapiens GN=NTRK1 PE=1 SV=4                          | NTRK1_HUMAN  | 87 kDa  | 0 | 0 | 1 | 0 |
| Nuclear pore complex protein Nup107 OS=Homo sapiens GN=NUP107 PE=1 SV=1                                | NU107_HUMAN  | 106 kDa | 0 | 0 | 1 | 0 |
| Phosphate-regulating neutral endopeptidase OS=Homo sapiens GN=PHEX PE=1 SV=1                           | PHEX_HUMAN   | 86 kDa  | 0 | 0 | 1 | 0 |
| Serine/threonine-protein phosphatase with EF-hands 1 OS=Homo sapiens GN=PPEF1 PE=1 SV=1                | PPE1_HUMAN   | 76 kDa  | 0 | 0 | 1 | 0 |
| Prominin-1 OS=Homo sapiens GN=PROM1 PE=1 SV=1                                                          | PROM1_HUMAN  | 97 kDa  | 0 | 0 | 1 | 0 |
| Ras-related protein Rab-23 OS=Homo sapiens GN=RAB23 PE=1 SV=1                                          | RAB23_HUMAN  | 27 kDa  | 0 | 0 | 1 | 0 |
| 40S ribosomal protein S11 OS=Homo sapiens GN=RPS11 PE=1 SV=3                                           | RS11_HUMAN   | 18 kDa  | 0 | 0 | 1 | 0 |
| Ras-like protein family member 11B OS=Homo sapiens GN=RASL11B PE=2 SV=1                                | RS1BB_HUMAN  | 28 kDa  | 0 | 0 | 1 | 0 |
| Testis anion transporter 1 OS=Homo sapiens GN=SLC26A8 PE=1 SV=1                                        | S26A8_HUMAN  | 109 kDa | 0 | 0 | 1 | 0 |
| SH3 domain-containing protein 21 OS=Homo sapiens GN=SH3D21 PE=1 SV=2                                   | SH321_HUMAN  | 71 kDa  | 0 | 0 | 1 | 0 |
| Protein shisa-9 OS=Homo sapiens GN=SHSA9 PE=2 SV=3                                                     | SHSA9_HUMAN  | 47 kDa  | 0 | 0 | 1 | 0 |
| Spermatogenesis-associated protein 4 OS=Homo sapiens GN=SPATA4 PE=2 SV=1                               | SPAT4_HUMAN  | 35 kDa  | 0 | 0 | 1 | 0 |
| Glutamine--tRNA ligase OS=Homo sapiens GN=QARS PE=1 SV=1                                               | SYQ_HUMAN    | 88 kDa  | 0 | 0 | 1 | 0 |
| Testis-expressed sequence 29 protein OS=Homo sapiens GN=TEX29 PE=1 SV=1                                | TEX29_HUMAN  | 17 kDa  | 0 | 0 | 1 | 0 |
| Tetratricopeptide repeat protein 25 OS=Homo sapiens GN=TTC25 PE=1 SV=2                                 | TTC25_HUMAN  | 77 kDa  | 0 | 0 | 1 | 0 |
| Ubiquilin-1 OS=Homo sapiens GN=UBQLN1 PE=1 SV=2                                                        | UBQL1_HUMAN  | 63 kDa  | 0 | 0 | 1 | 0 |
| Putative UDP-GlcNAc:betaGal beta-1,3-N-acetylglucosaminyltransferase LOC402377 OS=Homo sapiens PE      | YI036_HUMAN  | 43 kDa  | 0 | 0 | 1 | 0 |
| Zinc finger BED domain-containing protein 1 OS=Homo sapiens GN=ZBED1 PE=1 SV=1                         | ZBED1_HUMAN  | 78 kDa  | 0 | 0 | 1 | 0 |
| Zinc finger CCH-type antiviral protein 1-like OS=Homo sapiens GN=ZC3HAV1L PE=1 SV=2                    | ZCCHL1_HUMAN | 33 kDa  | 0 | 0 | 1 | 0 |
| Zinc finger protein 226 OS=Homo sapiens GN=ZNF226 PE=2 SV=2                                            | ZN226_HUMAN  | 92 kDa  | 0 | 0 | 1 | 0 |
| Protein naked cuticle homolog 1 OS=Homo sapiens GN=NKD1 PE=1 SV=1                                      | NKD1_HUMAN   | 52 kDa  | 0 | 1 | 0 | 0 |
| Olfactory receptor 14J1 OS=Homo sapiens GN=OR14J1 PE=2 SV=1                                            | O14J1_HUMAN  | 36 kDa  | 0 | 0 | 0 | 1 |
| Peptidyl-prolyl cis-trans isomerase FKBP4 OS=Homo sapiens GN=FKBP4 PE=1 SV=3                           | FKBP4_HUMAN  | 52 kDa  | 0 | 1 | 0 | 0 |
| Tyrosine-protein kinase SYK OS=Homo sapiens GN=SYK PE=1 SV=1                                           | KSYK_HUMAN   | 72 kDa  | 0 | 0 | 1 | 0 |
| Tetratricopeptide repeat protein 28 OS=Homo sapiens GN=TTC28 PE=1 SV=4                                 | TTC28_HUMAN  | 271 kDa | 0 | 0 | 1 | 0 |
| ZAR1-like protein OS=Homo sapiens GN=ZAR1L PE=2 SV=2                                                   | ZAR1L_HUMAN  | 36 kDa  | 0 | 0 | 0 | 1 |
| Alanine--glyoxylate aminotransferase 2, mitochondrial OS=Homo sapiens GN=AGXT2 PE=1 SV=1               | AGT2_HUMAN   | 57 kDa  | 0 | 0 | 1 | 0 |
| C-Jun-amino-terminal kinase-interacting protein 2 OS=Homo sapiens GN=MAPK8IP2 PE=2 SV=2                | JIP2_HUMAN   | 88 kDa  | 0 | 0 | 1 | 0 |
| Aldo-keto reductase family 1 member C3 OS=Homo sapiens GN=AKR1C3 PE=1 SV=4                             | AK1C3_HUMAN  | 37 kDa  | 0 | 0 | 0 | 1 |
| Protein FAM81B OS=Homo sapiens GN=FAM81B PE=2 SV=3                                                     | FA81B_HUMAN  | 52 kDa  | 0 | 0 | 0 | 1 |
| Prostacyclin synthase OS=Homo sapiens GN=PTGIS PE=1 SV=1                                               | PTGIS_HUMAN  | 57 kDa  | 0 | 1 | 0 | 0 |
| Chymotrypsinogen B OS=Homo sapiens GN=CTRB1 PE=2 SV=1                                                  | CTRB1_HUMAN  | 28 kDa  | 0 | 1 | 0 | 0 |
| Down syndrome critical region protein 8 OS=Homo sapiens GN=DSCR8 PE=2 SV=2                             | DSCR8_HUMAN  | 11 kDa  | 0 | 1 | 0 | 0 |
| ER membrane protein complex subunit 3 OS=Homo sapiens GN=EMC3 PE=1 SV=3                                | EMC3_HUMAN   | 30 kDa  | 0 | 0 | 0 | 1 |
| Profilin-1 OS=Homo sapiens GN=PFN1 PE=1 SV=2                                                           | PROF1_HUMAN  | 15 kDa  | 0 | 1 | 0 | 0 |
| Tyrosine-protein phosphatase non-receptor type 21 OS=Homo sapiens GN=PTPN21 PE=1 SV=2                  | PTN21_HUMAN  | 133 kDa | 0 | 0 | 1 | 0 |
| Sentrin-specific protease 7 OS=Homo sapiens GN=SEN7 PE=1 SV=4                                          | SEN7_HUMAN   | 120 kDa | 0 | 0 | 0 | 1 |
| Frizzled-10 OS=Homo sapiens GN=FZD10 PE=2 SV=1                                                         | FZD10_HUMAN  | 65 kDa  | 0 | 0 | 1 | 0 |
| Protein phosphatase 1 regulatory subunit 12A OS=Homo sapiens GN=PPP1R12A PE=1 SV=1                     | MYPT1_HUMAN  | 115 kDa | 0 | 0 | 1 | 0 |
| Mammaglobin-B OS=Homo sapiens GN=SCGB2A1 PE=1 SV=1                                                     | SG2A1_HUMAN  | 11 kDa  | 0 | 0 | 0 | 1 |
| DNA repair protein XRCC1 OS=Homo sapiens GN=XRCC1 PE=1 SV=2                                            | XRCC1_HUMAN  | 69 kDa  | 0 | 0 | 0 | 1 |
| Schlafen family member 5 OS=Homo sapiens GN=SLFN5 PE=1 SV=1                                            | SLFN5_HUMAN  | 101 kDa | 0 | 1 | 0 | 0 |
| IGF-like family receptor 1 OS=Homo sapiens GN=IGFLR1 PE=1 SV=1                                         | IGFR1_HUMAN  | 38 kDa  | 0 | 0 | 1 | 0 |
| Transcription factor HIVEP2 OS=Homo sapiens GN=HIVEP2 PE=1 SV=2                                        | ZEP2_HUMAN   | 269 kDa | 0 | 0 | 1 | 0 |
| Sideroflexin-2 OS=Homo sapiens GN=SFXN2 PE=1 SV=2                                                      | SFXN2_HUMAN  | 36 kDa  | 0 | 0 | 1 | 0 |
| Tigger transposable element-derived protein 1 OS=Homo sapiens GN=TIGD1 PE=2 SV=1                       | TIGD1_HUMAN  | 67 kDa  | 0 | 0 | 0 | 1 |
| Zinc finger protein 154 OS=Homo sapiens GN=ZNF154 PE=2 SV=3                                            | ZN154_HUMAN  | 50 kDa  | 0 | 0 | 0 | 1 |
| Beta-adrenergic receptor kinase 2 OS=Homo sapiens GN=ADRBK2 PE=2 SV=2                                  | ARBK2_HUMAN  | 80 kDa  | 0 | 0 | 0 | 1 |
| IQ and AAA domain-containing protein 1 OS=Homo sapiens GN=IQCA1 PE=2 SV=1                              | IQCA1_HUMAN  | 95 kDa  | 0 | 0 | 1 | 0 |
| Olfactory receptor 2T29 OS=Homo sapiens GN=OR2T29 PE=2 SV=2                                            | O2T29_HUMAN  | 36 kDa  | 0 | 0 | 1 | 0 |
| WAP, kazal, immunoglobulin, kunitz and NTR domain-containing protein 1 OS=Homo sapiens GN=WFIKKN       | WFKN1_HUMAN  | 59 kDa  | 0 | 0 | 0 | 1 |
| Uncharacterized protein C22orf25 OS=Homo sapiens GN=C22orf25 PE=2 SV=1                                 | CV025_HUMAN  | 31 kDa  | 0 | 1 | 0 | 0 |
| Prokineticin receptor 2 OS=Homo sapiens GN=PROKR2 PE=1 SV=1                                            | PKR2_HUMAN   | 44 kDa  | 0 | 0 | 0 | 1 |
| Testis-specific Y-encoded-like protein 2 OS=Homo sapiens GN=TSPYL2 PE=1 SV=1                           | TSPYL2_HUMAN | 79 kDa  | 0 | 0 | 1 | 0 |
| Putative T-complex protein 1 subunit theta-like 1 OS=Homo sapiens GN=CCT8L1P PE=5 SV=1                 | TCPL1_HUMAN  | 60 kDa  | 0 | 0 | 0 | 1 |
| Microtubule-associated protein 4 OS=Homo sapiens GN=MAP4 PE=1 SV=3                                     | MAP4_HUMAN   | 121 kDa | 0 | 0 | 1 | 0 |
| Tetratricopeptide repeat protein 14 OS=Homo sapiens GN=TTC14 PE=1 SV=1                                 | TTC14_HUMAN  | 88 kDa  | 0 | 0 | 1 | 0 |
| Zinc finger and SCAN domain-containing protein 30 OS=Homo sapiens GN=ZSCAN30 PE=1 SV=1                 | ZSC30_HUMAN  | 56 kDa  | 0 | 0 | 1 | 0 |

|                                                                                                        |             |         |   |   |   |   |
|--------------------------------------------------------------------------------------------------------|-------------|---------|---|---|---|---|
| Cation channel sperm-associated protein 2 OS=Homo sapiens GN=CATSPER2 PE=1 SV=2                        | CTSR2_HUMAN | 62 kDa  | 0 | 0 | 1 | 0 |
| HERV-K_11q22.1 provirus ancestral Pol protein OS=Homo sapiens PE=3 SV=1                                | POK17_HUMAN | 107 kDa | 0 | 1 | 0 | 0 |
| Hypoxia-inducible factor 1-alpha OS=Homo sapiens GN=HIF1A PE=1 SV=1                                    | HIF1A_HUMAN | 93 kDa  | 0 | 0 | 0 | 1 |
| Olfactory receptor 13C4 OS=Homo sapiens GN=OR13C4 PE=2 SV=1                                            | O13C4_HUMAN | 36 kDa  | 0 | 0 | 0 | 1 |
| Putative heat shock protein HSP 90-alpha A5 OS=Homo sapiens GN=HSP90AA5P PE=1 SV=1                     | HS905_HUMAN | 39 kDa  | 0 | 1 | 0 | 0 |
| Probable G-protein coupled receptor 75 OS=Homo sapiens GN=GPR75 PE=2 SV=1                              | GPR75_HUMAN | 59 kDa  | 0 | 1 | 0 | 0 |
| Osteopontin OS=Homo sapiens GN=SPP1 PE=1 SV=1                                                          | OSTP_HUMAN  | 35 kDa  | 0 | 0 | 1 | 0 |
| Transcription factor 7-like 1 OS=Homo sapiens GN=TCF7L1 PE=2 SV=1                                      | TF7L1_HUMAN | 63 kDa  | 0 | 0 | 1 | 0 |
| Keratin-associated protein 4-5 OS=Homo sapiens GN=KRTAP4-5 PE=2 SV=4                                   | KRA45_HUMAN | 19 kDa  | 0 | 0 | 1 | 0 |
| Phosphatidylinositol 3,4,5-trisphosphate 5-phosphatase 2 OS=Homo sapiens GN=INPPL1 PE=1 SV=2           | SHIP2_HUMAN | 139 kDa | 0 | 0 | 0 | 1 |
| Zinc finger protein 558 OS=Homo sapiens GN=ZNF558 PE=2 SV=1                                            | ZN558_HUMAN | 46 kDa  | 0 | 0 | 1 | 0 |
| Rho GTPase-activating protein 10 OS=Homo sapiens GN=ARHGAP10 PE=1 SV=1                                 | RHG10_HUMAN | 89 kDa  | 0 | 0 | 1 | 0 |
| F-box-like/WD repeat-containing protein TBL1Y OS=Homo sapiens GN=TBL1Y PE=2 SV=1                       | TBL1Y_HUMAN | 57 kDa  | 0 | 0 | 1 | 0 |
| Histamine H3 receptor OS=Homo sapiens GN=HRH3 PE=1 SV=2                                                | HRH3_HUMAN  | 49 kDa  | 0 | 0 | 1 | 0 |
| Methyltransferase-like protein 8 OS=Homo sapiens GN=METTL8 PE=2 SV=2                                   | METL8_HUMAN | 33 kDa  | 0 | 0 | 1 | 0 |
| Golgin subfamily A member 6-like protein 1 OS=Homo sapiens GN=GOLGA6L1 PE=2 SV=2                       | GG6L1_HUMAN | 77 kDa  | 0 | 0 | 1 | 0 |
| Intraflagellar transport protein 52 homolog OS=Homo sapiens GN=IFT52 PE=2 SV=3                         | IFT52_HUMAN | 50 kDa  | 0 | 1 | 0 | 0 |
| Pyroglutamyl-peptidase 1-like protein OS=Homo sapiens GN=PGPEP1L PE=2 SV=4                             | PGPIL_HUMAN | 22 kDa  | 0 | 0 | 1 | 0 |
| Prolyl 4-hydroxylase subunit alpha-3 OS=Homo sapiens GN=P4HA3 PE=1 SV=1                                | P4HA3_HUMAN | 61 kDa  | 0 | 0 | 1 | 0 |
| PTPN13-like protein, Y-linked OS=Homo sapiens GN=PRY PE=1 SV=2                                         | PRY_HUMAN   | 17 kDa  | 0 | 0 | 0 | 1 |
| Multidrug resistance-associated protein 7 OS=Homo sapiens GN=ABCC10 PE=1 SV=1                          | MRP7_HUMAN  | 162 kDa | 0 | 1 | 0 | 0 |
| Relaxin receptor 2 OS=Homo sapiens GN=RXFP2 PE=1 SV=1                                                  | RXFP2_HUMAN | 86 kDa  | 0 | 0 | 0 | 1 |
| Splicing factor 3A subunit 1 OS=Homo sapiens GN=SF3A1 PE=1 SV=1                                        | SF3A1_HUMAN | 89 kDa  | 0 | 0 | 1 | 0 |
| LIM/homeobox protein Lhx6 OS=Homo sapiens GN=LHX6 PE=2 SV=2                                            | LHX6_HUMAN  | 40 kDa  | 0 | 0 | 0 | 1 |
| P2X purinoceptor 4 OS=Homo sapiens GN=P2RX4 PE=1 SV=2                                                  | P2RX4_HUMAN | 43 kDa  | 0 | 1 | 0 | 0 |
| cAMP and cAMP-inhibited cGMP 3',5'-cyclic phosphodiesterase 10A OS=Homo sapiens GN=PDE10A PE=1 SV=1    | PDE10_HUMAN | 88 kDa  | 0 | 0 | 1 | 0 |
| E3 ubiquitin-protein ligase MARCKS OS=Homo sapiens GN=MARCH6 PE=1 SV=2                                 | MARH6_HUMAN | 103 kDa | 0 | 1 | 0 | 0 |
| Receptor-type tyrosine-protein phosphatase kappa OS=Homo sapiens GN=PTPRK PE=1 SV=2                    | PTPRK_HUMAN | 162 kDa | 0 | 1 | 0 | 0 |
| Bifunctional purine biosynthesis protein PURH OS=Homo sapiens GN=ATIC PE=1 SV=3                        | PUR9_HUMAN  | 65 kDa  | 0 | 0 | 0 | 1 |
| Putative uncharacterized protein C11orf80 OS=Homo sapiens GN=C11orf80 PE=2 SV=1                        | CK080_HUMAN | 58 kDa  | 0 | 0 | 1 | 0 |
| Netrin-5 OS=Homo sapiens GN=NTN5 PE=2 SV=2                                                             | NETS_HUMAN  | 53 kDa  | 0 | 0 | 1 | 0 |
| Protein CASP OS=Homo sapiens GN=CUX1 PE=1 SV=2                                                         | CASP_HUMAN  | 77 kDa  | 0 | 0 | 1 | 0 |
| Zinc finger protein 449 OS=Homo sapiens GN=ZNF449 PE=2 SV=3                                            | ZN449_HUMAN | 60 kDa  | 0 | 1 | 0 | 0 |
| Tubby-related protein 3 OS=Homo sapiens GN=TULP3 PE=1 SV=2                                             | TULP3_HUMAN | 50 kDa  | 0 | 0 | 0 | 1 |
| TBC1 domain family member 12 OS=Homo sapiens GN=TBC1D12 PE=1 SV=3                                      | TBC12_HUMAN | 86 kDa  | 0 | 0 | 1 | 0 |
| 15 kDa selenoprotein OS=Homo sapiens GN=SEP15 PE=1 SV=3                                                | SEP15_HUMAN | 18 kDa  | 0 | 1 | 0 | 0 |
| Metallothionein-3 OS=Homo sapiens GN=MT3 PE=1 SV=1                                                     | MT3_HUMAN   | 7 kDa   | 0 | 0 | 1 | 0 |
| tRNA-dihydrouridine(47) synthase [NAD(P)(+)]-like OS=Homo sapiens GN=DUS3L PE=1 SV=2                   | DUS3L_HUMAN | 73 kDa  | 0 | 1 | 0 | 0 |
| FERM and PDZ domain-containing protein 2 OS=Homo sapiens GN=FRMPD2 PE=1 SV=3                           | FRPD2_HUMAN | 144 kDa | 0 | 0 | 1 | 0 |
| Succinate-semialdehyde dehydrogenase, mitochondrial OS=Homo sapiens GN=ALDH5A1 PE=1 SV=2               | SSDH_HUMAN  | 57 kDa  | 0 | 0 | 1 | 0 |
| Tripartite motif-containing protein 65 OS=Homo sapiens GN=TRIM65 PE=1 SV=3                             | TRI65_HUMAN | 57 kDa  | 0 | 1 | 0 | 0 |
| Protein unc-13 homolog B OS=Homo sapiens GN=UNC13B PE=1 SV=2                                           | UN13B_HUMAN | 181 kDa | 0 | 0 | 1 | 0 |
| Lactosylceramide 4-alpha-galactosyltransferase OS=Homo sapiens GN=A4GALT PE=2 SV=1                     | A4GAT_HUMAN | 41 kDa  | 0 | 0 | 1 | 0 |
| Metallothionein-1X OS=Homo sapiens GN=MT1X PE=1 SV=1                                                   | MT1X_HUMAN  | 6 kDa   | 0 | 1 | 0 | 0 |
| Ubiquitin carboxyl-terminal hydrolase CYLD OS=Homo sapiens GN=CYLD PE=1 SV=1                           | CYLD_HUMAN  | 107 kDa | 0 | 0 | 1 | 0 |
| Zinc finger matrin-type protein 4 OS=Homo sapiens GN=ZMAT4 PE=2 SV=1                                   | ZMAT4_HUMAN | 26 kDa  | 0 | 0 | 0 | 1 |
| MORC family CW-type zinc finger protein 1 OS=Homo sapiens GN=MORC1 PE=2 SV=2                           | MORC1_HUMAN | 113 kDa | 0 | 1 | 0 | 0 |
| Lipopolysaccharide-responsive and beige-like anchor protein OS=Homo sapiens GN=LRBA PE=1 SV=4          | LRBA_HUMAN  | 319 kDa | 0 | 1 | 0 | 0 |
| ATP-binding cassette sub-family B member 7, mitochondrial OS=Homo sapiens GN=ABCB7 PE=1 SV=2           | ABCB7_HUMAN | 83 kDa  | 0 | 0 | 1 | 0 |
| Pre-mRNA-splicing factor SPF27 OS=Homo sapiens GN=BCAS2 PE=1 SV=1                                      | SPF27_HUMAN | 26 kDa  | 0 | 0 | 1 | 0 |
| Proline-rich protein 11 OS=Homo sapiens GN=PRR11 PE=1 SV=1                                             | PRR11_HUMAN | 40 kDa  | 0 | 0 | 1 | 0 |
| Speedy protein E3 OS=Homo sapiens GN=SPDYE3 PE=2 SV=2                                                  | SPDE3_HUMAN | 64 kDa  | 0 | 0 | 1 | 0 |
| RING finger and CCHC-type zinc finger domain-containing protein 2 OS=Homo sapiens GN=RC3H2 PE=1 SV=1   | RC3H2_HUMAN | 132 kDa | 0 | 0 | 0 | 1 |
| Putative uncharacterized protein C12orf61 OS=Homo sapiens GN=C12orf61 PE=2 SV=1                        | CL061_HUMAN | 13 kDa  | 0 | 1 | 0 | 0 |
| Transmembrane protein 130 OS=Homo sapiens GN=TMEM130 PE=2 SV=1                                         | TM130_HUMAN | 48 kDa  | 0 | 1 | 0 | 0 |
| ATP-binding cassette sub-family A member 5 OS=Homo sapiens GN=ABCA5 PE=2 SV=2                          | ABCA5_HUMAN | 187 kDa | 0 | 0 | 0 | 1 |
| Dehydrodolichyl diphosphate synthase OS=Homo sapiens GN=DHDDS PE=1 SV=3                                | DHDDS_HUMAN | 39 kDa  | 0 | 0 | 0 | 1 |
| 26S proteasome non-ATPase regulatory subunit 5 OS=Homo sapiens GN=PSMD5 PE=1 SV=3                      | PSMD5_HUMAN | 56 kDa  | 0 | 1 | 0 | 0 |
| UMP-CMP kinase 2, mitochondrial OS=Homo sapiens GN=CMPK2 PE=1 SV=3                                     | CMPK2_HUMAN | 49 kDa  | 0 | 1 | 0 | 0 |
| MAM domain-containing glycosylphosphatidylinositol anchor protein 1 OS=Homo sapiens GN=MDGA1 PE=1 SV=1 | MDGA1_HUMAN | 106 kDa | 0 | 0 | 0 | 1 |
| Regucalcin OS=Homo sapiens GN=RGN PE=1 SV=1                                                            | RGN_HUMAN   | 33 kDa  | 0 | 0 | 0 | 1 |
| Band 4.1-like protein 4A OS=Homo sapiens GN=EPB41L4A PE=1 SV=2                                         | E41LA_HUMAN | 79 kDa  | 0 | 0 | 0 | 1 |
| Zinc finger protein 628 OS=Homo sapiens GN=ZNF628 PE=2 SV=2                                            | ZN628_HUMAN | 111 kDa | 0 | 0 | 1 | 0 |
| Membrane-associated phosphatidylinositol transfer protein 1 OS=Homo sapiens GN=PITPNM1 PE=1 SV=4       | PITM1_HUMAN | 135 kDa | 0 | 0 | 1 | 0 |
| Receptor-type tyrosine-protein phosphatase gamma OS=Homo sapiens GN=PTPRG PE=1 SV=4                    | PTPRG_HUMAN | 162 kDa | 0 | 1 | 0 | 0 |
| Synaptotagmin-4 OS=Homo sapiens GN=SYT4 PE=1 SV=1                                                      | SYT4_HUMAN  | 48 kDa  | 0 | 0 | 0 | 1 |
| S-acyl fatty acid synthase thioesterase, medium chain OS=Homo sapiens GN=OLAH PE=2 SV=1                | SAST_HUMAN  | 30 kDa  | 0 | 0 | 1 | 0 |
| Carbamoyl-phosphate synthase [ammonia], mitochondrial OS=Homo sapiens GN=CPSP1 PE=1 SV=2               | CPSM_HUMAN  | 165 kDa | 0 | 1 | 0 | 0 |
| WD repeat and HMG-box DNA-binding protein 1 OS=Homo sapiens GN=WDHD1 PE=1 SV=1                         | WDHD1_HUMAN | 126 kDa | 0 | 0 | 0 | 1 |
| Proline-rich transmembrane protein 3 OS=Homo sapiens GN=PRRT3 PE=1 SV=3                                | PRRT3_HUMAN | 102 kDa | 0 | 0 | 1 | 0 |
| Muscle, skeletal receptor tyrosine-protein kinase OS=Homo sapiens GN=MUSK PE=1 SV=1                    | MUSK_HUMAN  | 97 kDa  | 0 | 0 | 1 | 0 |
| Putative golgin subfamily A member 2-like protein 6 OS=Homo sapiens PE=5 SV=2                          | GG2L6_HUMAN | 24 kDa  | 0 | 0 | 1 | 0 |
| Protein AF-10 OS=Homo sapiens GN=MLLT10 PE=1 SV=1                                                      | AF10_HUMAN  | 109 kDa | 0 | 1 | 0 | 0 |
| Inositol 1,4,5-trisphosphate receptor type 2 OS=Homo sapiens GN=ITPR2 PE=1 SV=2                        | ITPR2_HUMAN | 308 kDa | 0 | 0 | 1 | 0 |
| Alpha-amyrase 1 OS=Homo sapiens GN=AMY1A PE=1 SV=2                                                     | AMY1_HUMAN  | 58 kDa  | 0 | 0 | 0 | 1 |
| Mediator of RNA polymerase II transcription subunit 19 OS=Homo sapiens GN=MED19 PE=1 SV=2              | MED19_HUMAN | 26 kDa  | 0 | 0 | 1 | 0 |
| Aquaporin-7 OS=Homo sapiens GN=AQP7 PE=1 SV=1                                                          | AQP7_HUMAN  | 37 kDa  | 0 | 0 | 0 | 1 |
| Clusterin-like protein 1 OS=Homo sapiens GN=CLUL1 PE=1 SV=1                                            | CLUL1_HUMAN | 54 kDa  | 0 | 0 | 1 | 0 |
| Cancer susceptibility candidate protein 1 OS=Homo sapiens GN=CASC1 PE=2 SV=2                           | CASC1_HUMAN | 83 kDa  | 0 | 1 | 0 | 0 |
| RGM domain family member B OS=Homo sapiens GN=RGMB PE=2 SV=3                                           | RGMB_HUMAN  | 48 kDa  | 0 | 1 | 0 | 0 |
| PR domain zinc finger protein 16 OS=Homo sapiens GN=PRDM16 PE=1 SV=3                                   | PRD16_HUMAN | 140 kDa | 0 | 0 | 1 | 0 |
| Transcription factor p65 OS=Homo sapiens GN=RELA PE=1 SV=2                                             | TF65_HUMAN  | 60 kDa  | 0 | 0 | 1 | 0 |

|                                                                                                            |             |         |   |   |   |   |
|------------------------------------------------------------------------------------------------------------|-------------|---------|---|---|---|---|
| Coiled-coil domain-containing protein 111 OS=Homo sapiens GN=CCDC111 PE=1 SV=2                             | CC111_HUMAN | 64 kDa  | 0 | 0 | 0 | 1 |
| DnaJ homolog subfamily B member 11 OS=Homo sapiens GN=DNAJB11 PE=1 SV=1                                    | DJB11_HUMAN | 41 kDa  | 0 | 0 | 0 | 1 |
| U3 small nucleolar ribonucleoprotein protein MPP10 OS=Homo sapiens GN=MPHOSPH10 PE=1 SV=2                  | MPP10_HUMAN | 79 kDa  | 0 | 1 | 0 | 0 |
| Coiled-coil domain-containing protein 79 OS=Homo sapiens GN=CCDC79 PE=2 SV=3                               | CCD79_HUMAN | 83 kDa  | 0 | 0 | 1 | 0 |
| PDZ and LIM domain protein 2 OS=Homo sapiens GN=PDLM2 PE=1 SV=1                                            | PDLI2_HUMAN | 37 kDa  | 0 | 0 | 1 | 0 |
| Inactive serine protease 35 OS=Homo sapiens GN=PRSS35 PE=2 SV=2                                            | PRS35_HUMAN | 47 kDa  | 0 | 0 | 1 | 0 |
| Liver-expressed antimicrobial peptide 2 OS=Homo sapiens GN=LEAP2 PE=1 SV=1                                 | LEAP2_HUMAN | 9 kDa   | 0 | 1 | 0 | 0 |
| Regulator of G-protein signaling 11 OS=Homo sapiens GN=RGS11 PE=1 SV=2                                     | RGS11_HUMAN | 53 kDa  | 0 | 0 | 1 | 0 |
| Kinesin-like protein KIF2B OS=Homo sapiens GN=KIF2B PE=1 SV=3                                              | KIF2B_HUMAN | 76 kDa  | 0 | 0 | 1 | 0 |
| Coiled-coil domain-containing protein 7 OS=Homo sapiens GN=CCDC7 PE=2 SV=2                                 | CCDC7_HUMAN | 56 kDa  | 0 | 1 | 0 | 0 |
| Delta(14)-sterol reductase OS=Homo sapiens GN=TM7SF2 PE=2 SV=3                                             | ERG24_HUMAN | 46 kDa  | 0 | 0 | 0 | 1 |
| [Pyruvate dehydrogenase [lipoamide]] kinase isozyme 3, mitochondrial OS=Homo sapiens GN=PKD3 PE=1          | PKD3_HUMAN  | 47 kDa  | 0 | 1 | 0 | 0 |
| Leucine-rich repeats and immunoglobulin-like domains protein 1 OS=Homo sapiens GN=LRIG1 PE=1 SV=2          | LRIG1_HUMAN | 119 kDa | 0 | 0 | 1 | 0 |
| Ras-related protein Rab-1B OS=Homo sapiens GN=RAB1B PE=1 SV=1                                              | RAB1B_HUMAN | 22 kDa  | 0 | 0 | 1 | 0 |
| ADP-ribosylation factor-like protein 13A OS=Homo sapiens GN=ARL13A PE=2 SV=2                               | AR13A_HUMAN | 33 kDa  | 0 | 0 | 0 | 1 |
| MKL/myocardin-like protein 2 OS=Homo sapiens GN=MKL2 PE=1 SV=3                                             | MKL2_HUMAN  | 118 kDa | 0 | 0 | 1 | 0 |
| Phosphoglucomutase-like protein 5 OS=Homo sapiens GN=PGM5 PE=1 SV=2                                        | PGM5_HUMAN  | 62 kDa  | 0 | 0 | 1 | 0 |
| Serpin H1 OS=Homo sapiens GN=SERPINH1 PE=1 SV=2                                                            | SERPH_HUMAN | 46 kDa  | 0 | 1 | 0 | 0 |
| Cathepsin L2 OS=Homo sapiens GN=CTSL2 PE=1 SV=2                                                            | CATL2_HUMAN | 37 kDa  | 0 | 1 | 0 | 0 |
| Neurabin-1 OS=Homo sapiens GN=PPP1R9A PE=1 SV=2                                                            | NEB1_HUMAN  | 123 kDa | 0 | 0 | 0 | 1 |
| Transmembrane channel-like protein 3 OS=Homo sapiens GN=TMC3 PE=1 SV=3                                     | TMC3_HUMAN  | 126 kDa | 0 | 0 | 1 | 0 |
| Major facilitator superfamily domain-containing protein 4 OS=Homo sapiens GN=MFS4 PE=2 SV=3                | MFS4_HUMAN  | 56 kDa  | 0 | 0 | 0 | 1 |
| Endothelin-converting enzyme-like 1 OS=Homo sapiens GN=ECEL1 PE=2 SV=3                                     | ECEL1_HUMAN | 88 kDa  | 0 | 0 | 1 | 0 |
| Pleckstrin homology domain-containing family A member 8 OS=Homo sapiens GN=PLEKHA8 PE=1 SV=3               | PKHA8_HUMAN | 58 kDa  | 0 | 0 | 1 | 0 |
| PH domain leucine-rich repeat-containing protein phosphatase 2 OS=Homo sapiens GN=PHLP2 PE=1 SV=           | PHLP2_HUMAN | 147 kDa | 0 | 1 | 0 | 0 |
| Creatine kinase U-type, mitochondrial OS=Homo sapiens GN=CKMT1A PE=1 SV=1                                  | KCRU_HUMAN  | 47 kDa  | 0 | 0 | 0 | 1 |
| Transcription factor E2F4 OS=Homo sapiens GN=E2F4 PE=1 SV=2                                                | E2F4_HUMAN  | 44 kDa  | 0 | 0 | 1 | 0 |
| Sialic acid-binding Ig-like lectin 12 OS=Homo sapiens GN=SIGLEC12 PE=2 SV=1                                | SIG12_HUMAN | 65 kDa  | 0 | 1 | 0 | 0 |
| Regulator of G-protein signaling 21 OS=Homo sapiens GN=RGS21 PE=2 SV=1                                     | RGS21_HUMAN | 18 kDa  | 0 | 0 | 1 | 0 |
| Tumor necrosis factor alpha-induced protein 8 OS=Homo sapiens GN=TNFAIP8 PE=2 SV=1                         | TFIP8_HUMAN | 23 kDa  | 0 | 0 | 1 | 0 |
| Multiple inositol polyphosphate phosphatase 1 OS=Homo sapiens GN=MINPP1 PE=1 SV=1                          | MINP1_HUMAN | 55 kDa  | 0 | 0 | 1 | 0 |
| Protein FAM75A3 OS=Homo sapiens GN=FAM75A3 PE=2 SV=1                                                       | F75A3_HUMAN | 149 kDa | 0 | 0 | 0 | 1 |
| Amyloid-like protein 1 OS=Homo sapiens GN=APLP1 PE=1 SV=3                                                  | APLP1_HUMAN | 72 kDa  | 0 | 1 | 0 | 0 |
| Putative polypeptide N-acetylgalactosaminyltransferase-like protein 3 OS=Homo sapiens GN=WBSCR17 PE=1 SV=1 | GLT13_HUMAN | 68 kDa  | 0 | 1 | 0 | 0 |
| ATP-binding cassette sub-family A member 9 OS=Homo sapiens GN=ABCA9 PE=1 SV=1                              | ABCA9_HUMAN | 184 kDa | 0 | 0 | 0 | 1 |
| Dual specificity mitogen-activated protein kinase kinase 7 OS=Homo sapiens GN=MAP2K7 PE=1 SV=2             | MP2K7_HUMAN | 47 kDa  | 0 | 0 | 1 | 0 |
| Protein disulfide-isomerase-like protein of the testis OS=Homo sapiens GN=PDILT PE=1 SV=2                  | PDILT_HUMAN | 67 kDa  | 0 | 0 | 0 | 1 |
| Large neutral amino acids transporter small subunit 3 OS=Homo sapiens GN=SLC43A1 PE=2 SV=1                 | LAT3_HUMAN  | 61 kDa  | 0 | 0 | 0 | 1 |
| Small kinetochore-associated protein OS=Homo sapiens GN=SKAP PE=1 SV=2                                     | SKAP_HUMAN  | 35 kDa  | 0 | 0 | 1 | 0 |
| Ankyrin repeat domain-containing protein 60 OS=Homo sapiens GN=ANKRD60 PE=2 SV=3                           | ANR60_HUMAN | 38 kDa  | 0 | 0 | 0 | 1 |
| Glycoprotein endo-alpha-1,2-mannosidase OS=Homo sapiens GN=MANEA PE=1 SV=1                                 | MANEA_HUMAN | 54 kDa  | 0 | 0 | 0 | 1 |
| Sodium-dependent phosphate transporter 1 OS=Homo sapiens GN=SLC20A1 PE=1 SV=1                              | S20A1_HUMAN | 74 kDa  | 0 | 0 | 0 | 1 |
| Coiled-coil domain-containing protein 82 OS=Homo sapiens GN=CCDC82 PE=1 SV=2                               | CCD82_HUMAN | 64 kDa  | 0 | 0 | 1 | 0 |
| Uncharacterized protein C20orf144 OS=Homo sapiens GN=C20orf144 PE=2 SV=1                                   | CT144_HUMAN | 17 kDa  | 0 | 0 | 1 | 0 |
| Xylyltransferase 2 OS=Homo sapiens GN=XYLT2 PE=2 SV=2                                                      | XYLT2_HUMAN | 97 kDa  | 0 | 0 | 1 | 0 |
| Forkhead box protein C1 OS=Homo sapiens GN=FOXC1 PE=1 SV=3                                                 | FOXC1_HUMAN | 57 kDa  | 0 | 0 | 1 | 0 |
| ADAMTS-like protein 5 OS=Homo sapiens GN=ADAMTSL5 PE=1 SV=2                                                | ATLS_HUMAN  | 52 kDa  | 0 | 0 | 0 | 1 |
| Ubiquinol-cytochrome c reductase complex chaperone CBP3 homolog OS=Homo sapiens GN=UQCC PE=1 SV=1          | UQCC_HUMAN  | 35 kDa  | 0 | 0 | 1 | 0 |
| Krueppel-related zinc finger protein 1 OS=Homo sapiens GN=HKR1 PE=2 SV=4                                   | HKR1_HUMAN  | 75 kDa  | 0 | 1 | 0 | 0 |
| UV-stimulated scaffold protein A OS=Homo sapiens GN=UVSSA PE=1 SV=2                                        | UVSSA_HUMAN | 81 kDa  | 0 | 1 | 0 | 0 |
| Engulfment and cell motility protein 3 OS=Homo sapiens GN=ELMO3 PE=1 SV=3                                  | ELMO3_HUMAN | 81 kDa  | 0 | 0 | 1 | 0 |
| Sorting nexin-6 OS=Homo sapiens GN=SNX6 PE=1 SV=1                                                          | SNX6_HUMAN  | 47 kDa  | 0 | 1 | 0 | 0 |
| Malate dehydrogenase, cytoplasmic OS=Homo sapiens GN=MDH1 PE=1 SV=4                                        | MDHC_HUMAN  | 36 kDa  | 0 | 1 | 0 | 0 |
| Zinc finger protein 131 OS=Homo sapiens GN=ZNF131 PE=2 SV=2                                                | ZN131_HUMAN | 71 kDa  | 0 | 0 | 1 | 0 |
| Zinc finger protein 571 OS=Homo sapiens GN=ZNF571 PE=2 SV=3                                                | ZN571_HUMAN | 71 kDa  | 0 | 1 | 0 | 0 |
| Zinc finger protein 107 OS=Homo sapiens GN=ZNF107 PE=2 SV=1                                                | ZN107_HUMAN | 91 kDa  | 0 | 0 | 1 | 0 |
| Tumor necrosis factor receptor superfamily member 12A OS=Homo sapiens GN=TNFRSF12A PE=1 SV=1               | TNR12_HUMAN | 14 kDa  | 0 | 0 | 0 | 1 |
| Sterol regulatory element-binding protein 2 OS=Homo sapiens GN=SREBF2 PE=1 SV=2                            | SRBP2_HUMAN | 124 kDa | 0 | 0 | 1 | 0 |
| Myotubularin-related protein 1 OS=Homo sapiens GN=MTMR1 PE=1 SV=4                                          | MTMR1_HUMAN | 75 kDa  | 0 | 1 | 0 | 0 |
| E3 ubiquitin-protein ligase RFWD3 OS=Homo sapiens GN=RFWD3 PE=1 SV=3                                       | RFWD3_HUMAN | 85 kDa  | 0 | 0 | 0 | 1 |
| Cyclin-T1 OS=Homo sapiens GN=CCNT1 PE=1 SV=1                                                               | CCNT1_HUMAN | 81 kDa  | 0 | 1 | 0 | 0 |
| Putative uncharacterized protein C14orf177 OS=Homo sapiens GN=C14orf177 PE=2 SV=1                          | CN177_HUMAN | 14 kDa  | 0 | 0 | 1 | 0 |
| Sodium-driven chloride bicarbonate exchanger OS=Homo sapiens GN=SLC4A10 PE=1 SV=1                          | S4A10_HUMAN | 126 kDa | 0 | 0 | 1 | 0 |
| Protein phosphatase 1 regulatory subunit 3A OS=Homo sapiens GN=PPP1R3A PE=1 SV=3                           | PPR3A_HUMAN | 126 kDa | 0 | 0 | 1 | 0 |
| Spermatogenesis-associated protein 2 OS=Homo sapiens GN=SPATA2 PE=1 SV=2                                   | SPAT2_HUMAN | 58 kDa  | 0 | 0 | 0 | 1 |
| UPF0378 protein KIAA0100 OS=Homo sapiens GN=KIAA0100 PE=1 SV=3                                             | K0100_HUMAN | 254 kDa | 0 | 1 | 0 | 0 |
| Adenylyltransferase and sulfurtransferase MOC53 OS=Homo sapiens GN=MOC53 PE=1 SV=1                         | MOC53_HUMAN | 50 kDa  | 0 | 0 | 0 | 1 |
| Cytochrome P450 2C8 OS=Homo sapiens GN=CYP2C8 PE=1 SV=2                                                    | CP2C8_HUMAN | 56 kDa  | 0 | 0 | 1 | 0 |
| Receptor-type tyrosine-protein phosphatase 0 OS=Homo sapiens GN=PTPRO PE=1 SV=2                            | PTPRO_HUMAN | 138 kDa | 0 | 0 | 0 | 1 |
| APC membrane recruitment protein 3 OS=Homo sapiens GN=FAM123C PE=2 SV=2                                    | AMER3_HUMAN | 90 kDa  | 0 | 0 | 0 | 1 |
| Cadherin-related family member 1 OS=Homo sapiens GN=CDHR1 PE=1 SV=2                                        | CDHR1_HUMAN | 94 kDa  | 0 | 1 | 0 | 0 |
| RRP12-like protein OS=Homo sapiens GN=RRP12 PE=1 SV=2                                                      | RRP12_HUMAN | 144 kDa | 0 | 0 | 1 | 0 |
| Ankyrin repeat and BTB/POZ domain-containing protein 2 OS=Homo sapiens GN=ABTB2 PE=2 SV=1                  | ABTB2_HUMAN | 93 kDa  | 0 | 1 | 0 | 0 |
| EF-hand calcium-binding domain-containing protein 3 OS=Homo sapiens GN=EFCAB3 PE=1 SV=1                    | EFCB3_HUMAN | 50 kDa  | 0 | 0 | 1 | 0 |
| 26S proteasome non-ATPase regulatory subunit 6 OS=Homo sapiens GN=PSMD6 PE=1 SV=1                          | PSMD6_HUMAN | 46 kDa  | 0 | 1 | 0 | 0 |
| UPF0415 protein C7orf25 OS=Homo sapiens GN=C7orf25 PE=1 SV=1                                               | CG025_HUMAN | 46 kDa  | 0 | 1 | 0 | 0 |
| Protein asunder homolog OS=Homo sapiens GN=Asun PE=1 SV=2                                                  | ASUN_HUMAN  | 80 kDa  | 0 | 0 | 0 | 1 |
| B-cell scaffold protein with ankyrin repeats OS=Homo sapiens GN=BANK1 PE=1 SV=3                            | BANK1_HUMAN | 89 kDa  | 0 | 0 | 1 | 0 |
| Glycine--tRNA ligase OS=Homo sapiens GN=GARS PE=1 SV=3                                                     | SYG_HUMAN   | 83 kDa  | 0 | 1 | 0 | 0 |
| Peptidyl-prolyl cis-trans isomerase-like 4 OS=Homo sapiens GN=PPIL4 PE=1 SV=1                              | PPIL4_HUMAN | 57 kDa  | 0 | 1 | 0 | 0 |
| WD repeat-containing protein 85 OS=Homo sapiens GN=WDR85 PE=2 SV=2                                         | WDR85_HUMAN | 51 kDa  | 0 | 0 | 0 | 1 |
| Trace amine-associated receptor 1 OS=Homo sapiens GN=TAAR1 PE=1 SV=1                                       | TAAR1_HUMAN | 39 kDa  | 0 | 0 | 1 | 0 |

|                                                                                                                                        |              |         |   |   |   |   |
|----------------------------------------------------------------------------------------------------------------------------------------|--------------|---------|---|---|---|---|
| Phosphatidylinositol 3,4,5-trisphosphate 3-phosphatase and dual-specificity protein phosphatase PTEN OS=Homo sapiens GN=PTEN PE=1 SV=1 | PTEN_HUMAN   | 47 kDa  | 0 | 0 | 1 | 0 |
| Mitochondrial inner membrane protein OS=Homo sapiens GN=IMMT PE=1 SV=1                                                                 | IMMT_HUMAN   | 84 kDa  | 0 | 0 | 0 | 1 |
| Transducin-like enhancer protein 3 OS=Homo sapiens GN=TLE3 PE=1 SV=2                                                                   | TLE3_HUMAN   | 83 kDa  | 0 | 0 | 0 | 1 |
| Gamma-crystallin D OS=Homo sapiens GN=CRYGD PE=1 SV=3                                                                                  | CRGD_HUMAN   | 21 kDa  | 0 | 0 | 1 | 0 |
| Zinc finger protein 589 OS=Homo sapiens GN=ZNF589 PE=1 SV=1                                                                            | ZNF589_HUMAN | 41 kDa  | 0 | 0 | 0 | 1 |
| Calpain-8 OS=Homo sapiens GN=CAPN8 PE=2 SV=3                                                                                           | CAN8_HUMAN   | 79 kDa  | 0 | 0 | 1 | 0 |
| Zinc finger protein 677 OS=Homo sapiens GN=ZNF677 PE=2 SV=1                                                                            | ZN677_HUMAN  | 68 kDa  | 0 | 1 | 0 | 0 |
| M-phase inducer phosphatase 2 OS=Homo sapiens GN=CDC25B PE=1 SV=2                                                                      | MPIP2_HUMAN  | 65 kDa  | 0 | 0 | 0 | 1 |
| 1,25-dihydroxyvitamin D(3) 24-hydroxylase, mitochondrial OS=Homo sapiens GN=CYP24A1 PE=1 SV=2                                          | CP24A_HUMAN  | 59 kDa  | 0 | 0 | 1 | 0 |
| tRNA-dihydrouridine(16/17) synthase [NAD(P)(+)]-like OS=Homo sapiens GN=DUS1L PE=1 SV=1                                                | DUS1L_HUMAN  | 53 kDa  | 0 | 1 | 0 | 0 |
| CAS1 domain-containing protein 1 OS=Homo sapiens GN=CASD1 PE=2 SV=1                                                                    | CASD1_HUMAN  | 92 kDa  | 0 | 1 | 0 | 0 |
| Uridine phosphorylase 1 OS=Homo sapiens GN=UPP1 PE=1 SV=1                                                                              | UPP1_HUMAN   | 34 kDa  | 0 | 1 | 0 | 0 |
| Transient receptor potential cation channel subfamily V member 2 OS=Homo sapiens GN=TRPV2 PE=1 SV=1                                    | TRPV2_HUMAN  | 86 kDa  | 0 | 1 | 0 | 0 |
| Protein FAM69B OS=Homo sapiens GN=FAM69B PE=2 SV=3                                                                                     | FA69B_HUMAN  | 49 kDa  | 0 | 0 | 1 | 0 |
| DNA-binding protein SATB1 OS=Homo sapiens GN=SATB1 PE=1 SV=1                                                                           | SATB1_HUMAN  | 86 kDa  | 0 | 0 | 1 | 0 |
| 14-3-3 protein epsilon OS=Homo sapiens GN=YWHAE PE=1 SV=1                                                                              | 1433E_HUMAN  | 29 kDa  | 0 | 0 | 0 | 1 |
| Coiled-coil domain-containing protein 75 OS=Homo sapiens GN=CCDC75 PE=1 SV=3                                                           | CCD75_HUMAN  | 30 kDa  | 0 | 0 | 0 | 1 |
| Cysteine and glycine-rich protein 3 OS=Homo sapiens GN=CSRP3 PE=1 SV=1                                                                 | CSRP3_HUMAN  | 21 kDa  | 0 | 0 | 0 | 1 |
| Beta-defensin 107 OS=Homo sapiens GN=DEFB107A PE=2 SV=3                                                                                | D107A_HUMAN  | 8 kDa   | 0 | 0 | 0 | 1 |
| 5' exonuclease Apollo OS=Homo sapiens GN=DCLRE1B PE=1 SV=1                                                                             | DCR1B_HUMAN  | 60 kDa  | 0 | 0 | 0 | 1 |
| Estradiol 17-beta-dehydrogenase 12 OS=Homo sapiens GN=HSD17B12 PE=1 SV=2                                                               | DHB12_HUMAN  | 34 kDa  | 0 | 0 | 0 | 1 |
| Eukaryotic translation initiation factor 3 subunit F OS=Homo sapiens GN=EIF3F PE=1 SV=1                                                | EIF3F_HUMAN  | 38 kDa  | 0 | 0 | 0 | 1 |
| Protein FAM101B OS=Homo sapiens GN=FAM101B PE=1 SV=1                                                                                   | F101B_HUMAN  | 23 kDa  | 0 | 0 | 0 | 1 |
| Protein FAM75A5 OS=Homo sapiens GN=FAM75A5 PE=2 SV=1                                                                                   | F75A5_HUMAN  | 149 kDa | 0 | 0 | 0 | 1 |
| Fibroblast growth factor 18 OS=Homo sapiens GN=FGF18 PE=1 SV=1                                                                         | FGF18_HUMAN  | 24 kDa  | 0 | 0 | 0 | 1 |
| Fibroblast growth factor-binding protein 3 OS=Homo sapiens GN=FGFBP3 PE=1 SV=1                                                         | FGFP3_HUMAN  | 28 kDa  | 0 | 0 | 0 | 1 |
| Histone H4 OS=Homo sapiens GN=HIST1H4A PE=1 SV=2                                                                                       | H4_HUMAN     | 11 kDa  | 0 | 0 | 0 | 1 |
| Homeobox protein HMX1 OS=Homo sapiens GN=HMX1 PE=2 SV=2                                                                                | HMX1_HUMAN   | 36 kDa  | 0 | 0 | 0 | 1 |
| Eukaryotic initiation factor 4A-III OS=Homo sapiens GN=EIF4A3 PE=1 SV=4                                                                | IF4A3_HUMAN  | 47 kDa  | 0 | 0 | 0 | 1 |
| Junctional protein associated with coronary artery disease OS=Homo sapiens GN=KIAA1462 PE=1 SV=3                                       | JCAD_HUMAN   | 148 kDa | 0 | 0 | 0 | 1 |
| Keratin, type I cytoskeletal 14 OS=Homo sapiens GN=KRT14 PE=1 SV=4                                                                     | K1C14_HUMAN  | 52 kDa  | 0 | 0 | 0 | 1 |
| Keratin-associated protein 19-2 OS=Homo sapiens GN=KRTAP19-2 PE=2 SV=1                                                                 | KR192_HUMAN  | 6 kDa   | 0 | 0 | 0 | 1 |
| Monocarboxylate transporter 1 OS=Homo sapiens GN=SLC16A1 PE=1 SV=3                                                                     | MOT1_HUMAN   | 54 kDa  | 0 | 0 | 0 | 1 |
| N-alpha-acetyltransferase 25, NatB auxiliary subunit OS=Homo sapiens GN=NAA25 PE=1 SV=1                                                | NAA25_HUMAN  | 112 kDa | 0 | 0 | 0 | 1 |
| Olfactory receptor 56A4 OS=Homo sapiens GN=OR56A4 PE=2 SV=2                                                                            | O56A4_HUMAN  | 35 kDa  | 0 | 0 | 0 | 1 |
| 59 kDa 2'-5'-oligoadenylate synthase-like protein OS=Homo sapiens GN=OASL PE=1 SV=2                                                    | OASL_HUMAN   | 59 kDa  | 0 | 0 | 0 | 1 |
| Mitochondrial ornithine transporter 1 OS=Homo sapiens GN=SLC25A15 PE=1 SV=1                                                            | ORNT1_HUMAN  | 33 kDa  | 0 | 0 | 0 | 1 |
| Oxysterol-binding protein-related protein 9 OS=Homo sapiens GN=OSBPL9 PE=1 SV=2                                                        | OSBL9_HUMAN  | 83 kDa  | 0 | 0 | 0 | 1 |
| Membrane-associated progesterone receptor component 2 OS=Homo sapiens GN=PGRMC2 PE=1 SV=1                                              | PGRC2_HUMAN  | 24 kDa  | 0 | 0 | 0 | 1 |
| PH and SEC7 domain-containing protein 2 OS=Homo sapiens GN=PSD2 PE=2 SV=3                                                              | PSD2_HUMAN   | 85 kDa  | 0 | 0 | 0 | 1 |
| RalBP1-associated Eps domain-containing protein 2 OS=Homo sapiens GN=REPS2 PE=1 SV=2                                                   | REPS2_HUMAN  | 72 kDa  | 0 | 0 | 0 | 1 |
| 60S ribosomal protein L24 OS=Homo sapiens GN=RPL24 PE=1 SV=1                                                                           | RL24_HUMAN   | 18 kDa  | 0 | 0 | 0 | 1 |
| R-spondin-3 OS=Homo sapiens GN=RSPO3 PE=2 SV=1                                                                                         | RSPO3_HUMAN  | 31 kDa  | 0 | 0 | 0 | 1 |
| Solute carrier family 25 member 48 OS=Homo sapiens GN=SLC25A48 PE=2 SV=2                                                               | S2548_HUMAN  | 33 kDa  | 0 | 0 | 0 | 1 |
| Zinc transporter SLC39A7 OS=Homo sapiens GN=SLC39A7 PE=1 SV=2                                                                          | S39A7_HUMAN  | 50 kDa  | 0 | 0 | 0 | 1 |
| Sialic acid-binding Ig-like lectin 16 OS=Homo sapiens GN=SIGLEC16 PE=2 SV=3                                                            | SIG16_HUMAN  | 53 kDa  | 0 | 0 | 0 | 1 |
| Solute carrier organic anion transporter family member 4A1 OS=Homo sapiens GN=SLCO4A1 PE=1 SV=2                                        | SO4A1_HUMAN  | 77 kDa  | 0 | 0 | 0 | 1 |
| General transcription factor 3C polypeptide 2 OS=Homo sapiens GN=GTF3C2 PE=1 SV=2                                                      | TF3C2_HUMAN  | 101 kDa | 0 | 0 | 0 | 1 |
| Testis-specific serine/threonine-protein kinase 6 OS=Homo sapiens GN=TSSK6 PE=1 SV=1                                                   | TSSK6_HUMAN  | 30 kDa  | 0 | 0 | 0 | 1 |
| Twintin-1 OS=Homo sapiens GN=TWIF1 PE=1 SV=3                                                                                           | TWF1_HUMAN   | 40 kDa  | 0 | 0 | 0 | 1 |
| Putative protein unc-93 homolog B1-like protein OS=Homo sapiens PE=5 SV=3                                                              | U93BL_HUMAN  | 27 kDa  | 0 | 0 | 0 | 1 |
| NEDD8-conjugating enzyme Ubc12 OS=Homo sapiens GN=UBE2M PE=1 SV=1                                                                      | UBC12_HUMAN  | 21 kDa  | 0 | 0 | 0 | 1 |
| U3 small nucleolar RNA-associated protein 18 homolog OS=Homo sapiens GN=UTP18 PE=1 SV=3                                                | UTP18_HUMAN  | 62 kDa  | 0 | 0 | 0 | 1 |
| Vesicle-associated membrane protein-associated protein A OS=Homo sapiens GN=VAPA PE=1 SV=3                                             | VAPA_HUMAN   | 28 kDa  | 0 | 0 | 0 | 1 |
| XK-related protein 8 OS=Homo sapiens GN=XKR8 PE=2 SV=1                                                                                 | XKR8_HUMAN   | 45 kDa  | 0 | 0 | 0 | 1 |
| Protein arginine N-methyltransferase 1 OS=Homo sapiens GN=PRMT1 PE=1 SV=2                                                              | ANM1_HUMAN   | 42 kDa  | 0 | 1 | 0 | 0 |
| Protein arginine N-methyltransferase 5 OS=Homo sapiens GN=PRMT5 PE=1 SV=4                                                              | ANM5_HUMAN   | 73 kDa  | 0 | 1 | 0 | 0 |
| Carbonic anhydrase 1 OS=Homo sapiens GN=CA1 PE=1 SV=2                                                                                  | CAH1_HUMAN   | 29 kDa  | 0 | 1 | 0 | 0 |
| Putative uncharacterized protein C3orf51 OS=Homo sapiens GN=C3orf51 PE=5 SV=2                                                          | CCO51_HUMAN  | 15 kDa  | 0 | 1 | 0 | 0 |
| Coiled-coil domain-containing protein 92 OS=Homo sapiens GN=CCDC92 PE=2 SV=2                                                           | CCD92_HUMAN  | 37 kDa  | 0 | 1 | 0 | 0 |
| T-cell surface glycoprotein CD1a OS=Homo sapiens GN=CD1A PE=1 SV=4                                                                     | CD1A_HUMAN   | 37 kDa  | 0 | 1 | 0 | 0 |
| O-acetyl-ADP-ribose deacetylase C6orf130 OS=Homo sapiens GN=C6orf130 PE=1 SV=2                                                         | CF130_HUMAN  | 17 kDa  | 0 | 1 | 0 | 0 |
| Cholinesterase OS=Homo sapiens GN=BCHE PE=1 SV=1                                                                                       | CHLE_HUMAN   | 68 kDa  | 0 | 1 | 0 | 0 |
| Cbp/p300-interacting transactivator 2 OS=Homo sapiens GN=CITED2 PE=1 SV=2                                                              | CITE2_HUMAN  | 28 kDa  | 0 | 1 | 0 | 0 |
| COX assembly mitochondrial protein homolog OS=Homo sapiens GN=CMC1 PE=1 SV=1                                                           | COXM1_HUMAN  | 12 kDa  | 0 | 1 | 0 | 0 |
| Cytochrome P450 2U1 OS=Homo sapiens GN=CYP2U1 PE=1 SV=1                                                                                | CP2U1_HUMAN  | 62 kDa  | 0 | 1 | 0 | 0 |
| Cystatin-C OS=Homo sapiens GN=CST3 PE=1 SV=1                                                                                           | CYTC_HUMAN   | 16 kDa  | 0 | 1 | 0 | 0 |
| Eukaryotic translation initiation factor 3 subunit I OS=Homo sapiens GN=EIF3I PE=1 SV=1                                                | EIF3I_HUMAN  | 37 kDa  | 0 | 1 | 0 | 0 |
| Erythroid membrane-associated protein OS=Homo sapiens GN=ERMAP PE=1 SV=1                                                               | ERMAP_HUMAN  | 53 kDa  | 0 | 1 | 0 | 0 |
| WASH complex subunit FAM21C OS=Homo sapiens GN=FAM21C PE=1 SV=3                                                                        | FA21C_HUMAN  | 145 kDa | 0 | 1 | 0 | 0 |
| Protein FAM70B OS=Homo sapiens GN=FAM70B PE=1 SV=1                                                                                     | FA70B_HUMAN  | 35 kDa  | 0 | 1 | 0 | 0 |
| FCH and double SH3 domains protein 2 OS=Homo sapiens GN=FCHSD2 PE=1 SV=3                                                               | FCS2D_HUMAN  | 84 kDa  | 0 | 1 | 0 | 0 |
| UDP-glucose 4-epimerase OS=Homo sapiens GN=GALE PE=1 SV=2                                                                              | GALE_HUMAN   | 38 kDa  | 0 | 1 | 0 | 0 |
| Bifunctional UDP-N-acetylglucosamine 2-epimerase/N-acetylmannosamine kinase OS=Homo sapiens GN=GLCNE                                   | GLCNE_HUMAN  | 79 kDa  | 0 | 1 | 0 | 0 |
| Glutamine synthetase OS=Homo sapiens GN=GLUL PE=1 SV=4                                                                                 | GLNA_HUMAN   | 42 kDa  | 0 | 1 | 0 | 0 |
| Interferon-induced protein with tetratricopeptide repeats 3 OS=Homo sapiens GN=IFIT3 PE=1 SV=1                                         | IFIT3_HUMAN  | 56 kDa  | 0 | 1 | 0 | 0 |
| X-linked interleukin-1 receptor accessory protein-like 2 OS=Homo sapiens GN=IL1RAPL2 PE=2 SV=1                                         | IRPL2_HUMAN  | 79 kDa  | 0 | 1 | 0 | 0 |
| Uncharacterized protein KIAA0528 OS=Homo sapiens GN=KIAA0528 PE=1 SV=1                                                                 | K0528_HUMAN  | 110 kDa | 0 | 1 | 0 | 0 |
| Kremen protein 1 OS=Homo sapiens GN=KREMEN1 PE=2 SV=3                                                                                  | KREM1_HUMAN  | 52 kDa  | 0 | 1 | 0 | 0 |
| Lipid phosphate phosphatase-related protein type 1 OS=Homo sapiens GN=LPPR1 PE=2 SV=1                                                  | LPPR1_HUMAN  | 36 kDa  | 0 | 1 | 0 | 0 |
| LysM and putative peptidoglycan-binding domain-containing protein 1 OS=Homo sapiens GN=LYSMD1 PE=1 SV=1                                | LYSMD1_HUMAN | 25 kDa  | 0 | 1 | 0 | 0 |
| Mitochondrial nucleoid factor 1 OS=Homo sapiens GN=MNF1 PE=1 SV=1                                                                      | MNF1_HUMAN   | 15 kDa  | 0 | 1 | 0 | 0 |

|                                                                                                       |              |         |   |   |   |   |
|-------------------------------------------------------------------------------------------------------|--------------|---------|---|---|---|---|
| Neurochondrin OS=Homo sapiens GN=NCDN PE=1 SV=1                                                       | NCDN_HUMAN   | 79 kDa  | 0 | 1 | 0 | 0 |
| Oxytocin-neurophysin 1 OS=Homo sapiens GN=OXT PE=1 SV=1                                               | NEU1_HUMAN   | 13 kDa  | 0 | 1 | 0 | 0 |
| Na(+)/H(+) exchange regulatory cofactor NHE-RF2 OS=Homo sapiens GN=SLC9A3R2 PE=1 SV=2                 | NHRF2_HUMAN  | 37 kDa  | 0 | 1 | 0 | 0 |
| Olfactory receptor 2C1 OS=Homo sapiens GN=OR2C1 PE=2 SV=3                                             | OR2C1_HUMAN  | 34 kDa  | 0 | 1 | 0 | 0 |
| Oxysterol-binding protein-related protein 10 OS=Homo sapiens GN=OSBPL10 PE=1 SV=2                     | OSB10_HUMAN  | 84 kDa  | 0 | 1 | 0 | 0 |
| Poly [ADP-ribose] polymerase 1 OS=Homo sapiens GN=PARP1 PE=1 SV=4                                     | PARP1_HUMAN  | 113 kDa | 0 | 1 | 0 | 0 |
| Probable proline racemase OS=Homo sapiens GN=C14orf149 PE=1 SV=2                                      | PRCM_HUMAN   | 38 kDa  | 0 | 1 | 0 | 0 |
| Protein S100-A10 OS=Homo sapiens GN=S100A10 PE=1 SV=2                                                 | S10AA_HUMAN  | 11 kDa  | 0 | 1 | 0 | 0 |
| Protein transport protein Sec24D OS=Homo sapiens GN=SEC24D PE=1 SV=2                                  | SC24D_HUMAN  | 113 kDa | 0 | 1 | 0 | 0 |
| Sodium/hydrogen exchanger 1 OS=Homo sapiens GN=SLC9A1 PE=1 SV=2                                       | SL9A1_HUMAN  | 91 kDa  | 0 | 1 | 0 | 0 |
| Protein spinster homolog 2 OS=Homo sapiens GN=SPNS2 PE=1 SV=2                                         | SPNS2_HUMAN  | 58 kDa  | 0 | 1 | 0 | 0 |
| T-cell-interacting, activating receptor on myeloid cells protein 1 OS=Homo sapiens GN=TARM1 PE=2 SV=1 | TARM1_HUMAN  | 29 kDa  | 0 | 1 | 0 | 0 |
| Transmembrane protein 187 OS=Homo sapiens GN=TMEM187 PE=2 SV=1                                        | TM187_HUMAN  | 29 kDa  | 0 | 1 | 0 | 0 |
| Transmembrane protein 40 OS=Homo sapiens GN=TMEM40 PE=1 SV=2                                          | TMM40_HUMAN  | 25 kDa  | 0 | 1 | 0 | 0 |
| Transient receptor potential cation channel subfamily V member 1 OS=Homo sapiens GN=TRPV1 PE=1 SV=1   | TRPV1_HUMAN  | 95 kDa  | 0 | 1 | 0 | 0 |
| Trypsin-2 OS=Homo sapiens GN=PRSS2 PE=1 SV=1                                                          | TRY2_HUMAN   | 26 kDa  | 0 | 1 | 0 | 0 |
| Vacuolar protein sorting-associated protein 37B OS=Homo sapiens GN=VPS37B PE=1 SV=1                   | VP37B_HUMAN  | 31 kDa  | 0 | 1 | 0 | 0 |
| Zinc finger protein 623 OS=Homo sapiens GN=ZNF623 PE=2 SV=2                                           | ZN623_HUMAN  | 61 kDa  | 0 | 1 | 0 | 0 |
| Very long-chain specific acyl-CoA dehydrogenase, mitochondrial OS=Homo sapiens GN=ACADVL PE=1 SV=1    | ACADV_HUMAN  | 70 kDa  | 0 | 0 | 1 | 0 |
| Arf-GAP with GTPase, ANK repeat and PH domain-containing protein 4 OS=Homo sapiens GN=AGAP4 PE=1 SV=1 | AGAP4_HUMAN  | 73 kDa  | 0 | 0 | 1 | 0 |
| Sodium/potassium-transporting ATPase subunit alpha-3 OS=Homo sapiens GN=ATP1A3 PE=1 SV=3              | AT1A3_HUMAN  | 112 kDa | 0 | 0 | 1 | 0 |
| Sodium/potassium-transporting ATPase subunit beta-2 OS=Homo sapiens GN=ATP1B2 PE=1 SV=3               | AT1B2_HUMAN  | 33 kDa  | 0 | 0 | 1 | 0 |
| Putative ataxin-3-like protein OS=Homo sapiens GN=ATXN3L PE=5 SV=2                                    | ATX3L_HUMAN  | 41 kDa  | 0 | 0 | 1 | 0 |
| Serine/threonine-protein kinase B-raf OS=Homo sapiens GN=BRAF PE=1 SV=4                               | BRAF_HUMAN   | 84 kDa  | 0 | 0 | 1 | 0 |
| Tyrosine-protein kinase BTK OS=Homo sapiens GN=BTK PE=1 SV=3                                          | BTK_HUMAN    | 76 kDa  | 0 | 0 | 1 | 0 |
| Caspase recruitment domain-containing protein 8 OS=Homo sapiens GN=CARD8 PE=1 SV=1                    | CARD8_HUMAN  | 49 kDa  | 0 | 0 | 1 | 0 |
| Uncharacterized protein C2orf14-like 2 OS=Homo sapiens PE=4 SV=1                                      | CB142_HUMAN  | 12 kDa  | 0 | 0 | 1 | 0 |
| Coiled-coil domain-containing protein 30 OS=Homo sapiens GN=CCDC30 PE=2 SV=1                          | CCD30_HUMAN  | 91 kDa  | 0 | 0 | 1 | 0 |
| Uncharacterized protein C8orf74 OS=Homo sapiens GN=C8orf74 PE=2 SV=3                                  | CH074_HUMAN  | 34 kDa  | 0 | 0 | 1 | 0 |
| Transmembrane protein C9orf91 OS=Homo sapiens GN=C9orf91 PE=2 SV=1                                    | CI091_HUMAN  | 38 kDa  | 0 | 0 | 1 | 0 |
| CAP-Gly domain-containing linker protein 3 OS=Homo sapiens GN=CLIP3 PE=1 SV=3                         | CLIP3_HUMAN  | 60 kDa  | 0 | 0 | 1 | 0 |
| Gap junction alpha-9 protein OS=Homo sapiens GN=GJA9 PE=2 SV=2                                        | CXA9_HUMAN   | 59 kDa  | 0 | 0 | 1 | 0 |
| Beta-defensin 113 OS=Homo sapiens GN=DEFB113 PE=2 SV=1                                                | DB113_HUMAN  | 10 kDa  | 0 | 0 | 1 | 0 |
| Cytoplasmic dynein 1 intermediate chain 2 OS=Homo sapiens GN=DYNC1I2 PE=1 SV=3                        | DC1I2_HUMAN  | 71 kDa  | 0 | 0 | 1 | 0 |
| Dynactin subunit 2 OS=Homo sapiens GN=DCTN2 PE=1 SV=4                                                 | DCTN2_HUMAN  | 44 kDa  | 0 | 0 | 1 | 0 |
| Protein DDI1 homolog 2 OS=Homo sapiens GN=DDI2 PE=1 SV=1                                              | DDI2_HUMAN   | 45 kDa  | 0 | 0 | 1 | 0 |
| DNA polymerase beta OS=Homo sapiens GN=POLB PE=1 SV=3                                                 | DPOLB_HUMAN  | 38 kDa  | 0 | 0 | 1 | 0 |
| Duffy antigen/chemokine receptor OS=Homo sapiens GN=DARC PE=1 SV=3                                    | DUFFY_HUMAN  | 36 kDa  | 0 | 0 | 1 | 0 |
| Elongation factor 1-delta OS=Homo sapiens GN=EEF1D PE=1 SV=5                                          | EF1D_HUMAN   | 31 kDa  | 0 | 0 | 1 | 0 |
| CAAX prenyl protease 1 homolog OS=Homo sapiens GN=ZMPSTE24 PE=1 SV=2                                  | FACE1_HUMAN  | 55 kDa  | 0 | 0 | 1 | 0 |
| Fanconi anemia group E protein OS=Homo sapiens GN=FANCE PE=1 SV=1                                     | FANCE_HUMAN  | 59 kDa  | 0 | 0 | 1 | 0 |
| Non-lysosomal glucosylceramidase OS=Homo sapiens GN=GBA2 PE=1 SV=2                                    | GBA2_HUMAN   | 105 kDa | 0 | 0 | 1 | 0 |
| Putative golgin subfamily A member 6-like protein 6 OS=Homo sapiens GN=GOLGA6L6 PE=5 SV=3             | GG6L6_HUMAN  | 94 kDa  | 0 | 0 | 1 | 0 |
| G-protein coupled receptor 12 OS=Homo sapiens GN=GPR12 PE=1 SV=1                                      | GPR12_HUMAN  | 37 kDa  | 0 | 0 | 1 | 0 |
| Probable G-protein coupled receptor 27 OS=Homo sapiens GN=GPR27 PE=2 SV=1                             | GPR27_HUMAN  | 40 kDa  | 0 | 0 | 1 | 0 |
| G-protein coupled receptor 87 OS=Homo sapiens GN=GPR87 PE=2 SV=1                                      | GPR87_HUMAN  | 41 kDa  | 0 | 0 | 1 | 0 |
| Glutathione peroxidase 7 OS=Homo sapiens GN=GPX7 PE=1 SV=1                                            | GPX7_HUMAN   | 21 kDa  | 0 | 0 | 1 | 0 |
| Glutamate-rich WD repeat-containing protein 1 OS=Homo sapiens GN=GRWD1 PE=1 SV=1                      | GRWD1_HUMAN  | 49 kDa  | 0 | 0 | 1 | 0 |
| Histone H2B type 1-B OS=Homo sapiens GN=HIST1H2BB PE=1 SV=2                                           | H2B1B_HUMAN  | 14 kDa  | 0 | 0 | 1 | 0 |
| Putative HIN1-like protein OS=Homo sapiens GN=HIN1L PE=5 SV=1                                         | HIN1L_HUMAN  | 50 kDa  | 0 | 0 | 1 | 0 |
| Putative uncharacterized protein HUG-1 OS=Homo sapiens GN=HUG1 PE=5 SV=2                              | HUG1_HUMAN   | 39 kDa  | 0 | 0 | 1 | 0 |
| Homeobox protein Hox-A11 OS=Homo sapiens GN=HOXA11 PE=2 SV=2                                          | HXA11_HUMAN  | 34 kDa  | 0 | 0 | 1 | 0 |
| Immunoglobulin superfamily member 23 OS=Homo sapiens GN=IGSF23 PE=2 SV=2                              | IGS23_HUMAN  | 21 kDa  | 0 | 0 | 1 | 0 |
| IQ domain-containing protein F3 OS=Homo sapiens GN=IQCF3 PE=2 SV=1                                    | IQCF3_HUMAN  | 18 kDa  | 0 | 0 | 1 | 0 |
| Isthmin-1 OS=Homo sapiens GN=ISM1 PE=2 SV=2                                                           | ISM1_HUMAN   | 52 kDa  | 0 | 0 | 1 | 0 |
| Potassium voltage-gated channel subfamily V member 2 OS=Homo sapiens GN=KCNV2 PE=1 SV=1               | KCNV2_HUMAN  | 62 kDa  | 0 | 0 | 1 | 0 |
| Keratin-associated protein 1-3 OS=Homo sapiens GN=KRTAP1-3 PE=2 SV=1                                  | KRA13_HUMAN  | 18 kDa  | 0 | 0 | 1 | 0 |
| Protein LMBR1L OS=Homo sapiens GN=LMBR1L PE=1 SV=2                                                    | LMBRL_HUMAN  | 55 kDa  | 0 | 0 | 1 | 0 |
| Lipoma-preferred partner OS=Homo sapiens GN=LPP PE=1 SV=1                                             | LPP_HUMAN    | 66 kDa  | 0 | 0 | 1 | 0 |
| Leucine-rich repeat-containing protein 4B OS=Homo sapiens GN=LRR4B PE=1 SV=3                          | LRC4B_HUMAN  | 76 kDa  | 0 | 0 | 1 | 0 |
| E3 ubiquitin-protein ligase MARCH11 OS=Homo sapiens GN=MARCH11 PE=2 SV=3                              | MARHB_HUMAN  | 44 kDa  | 0 | 0 | 1 | 0 |
| Myc-associated zinc finger protein OS=Homo sapiens GN=MAZ PE=1 SV=1                                   | MAZ_HUMAN    | 49 kDa  | 0 | 0 | 1 | 0 |
| Multidrug resistance protein 1 OS=Homo sapiens GN=ABCB1 PE=1 SV=3                                     | MDR1_HUMAN   | 141 kDa | 0 | 0 | 1 | 0 |
| Microtubule-associated proteins 1A/1B light chain 3C OS=Homo sapiens GN=MAP1LC3C PE=1 SV=1            | MLP3C_HUMAN  | 17 kDa  | 0 | 0 | 1 | 0 |
| Monocarboxylate transporter 11 OS=Homo sapiens GN=SLC16A11 PE=2 SV=1                                  | MOT11_HUMAN  | 48 kDa  | 0 | 0 | 1 | 0 |
| Neuroblastoma breakpoint family member 11 OS=Homo sapiens GN=NBPF11 PE=2 SV=3                         | NBPF6_HUMAN  | 99 kDa  | 0 | 0 | 1 | 0 |
| Nicalin OS=Homo sapiens GN=NCLN PE=1 SV=2                                                             | NCLN_HUMAN   | 63 kDa  | 0 | 0 | 1 | 0 |
| Neuropilin and tolloid-like protein 2 OS=Homo sapiens GN=NETO2 PE=1 SV=1                              | NETO2_HUMAN  | 59 kDa  | 0 | 0 | 1 | 0 |
| NHL repeat-containing protein 3 OS=Homo sapiens GN=NHLRC3 PE=2 SV=1                                   | NHLRC3_HUMAN | 38 kDa  | 0 | 0 | 1 | 0 |
| NK1 transcription factor-related protein 1 OS=Homo sapiens GN=NKX1-1 PE=2 SV=2                        | NKX11_HUMAN  | 41 kDa  | 0 | 0 | 1 | 0 |
| Nicotinamide riboside kinase 1 OS=Homo sapiens GN=NMRK1 PE=1 SV=1                                     | NRK1_HUMAN   | 23 kDa  | 0 | 0 | 1 | 0 |
| Protein N-terminal glutamine amidohydrolase OS=Homo sapiens GN=WDYHV1 PE=1 SV=2                       | NTAQ1_HUMAN  | 24 kDa  | 0 | 0 | 1 | 0 |
| Olfactory receptor 10H3 OS=Homo sapiens GN=OR10H3 PE=2 SV=1                                           | O10H3_HUMAN  | 36 kDa  | 0 | 0 | 1 | 0 |
| Putative olfactory receptor 4A8 OS=Homo sapiens GN=OR4A8P PE=5 SV=1                                   | OR4A8_HUMAN  | 36 kDa  | 0 | 0 | 1 | 0 |
| Osteopetrosis-associated transmembrane protein 1 OS=Homo sapiens GN=OSTM1 PE=1 SV=1                   | OSTM1_HUMAN  | 37 kDa  | 0 | 0 | 1 | 0 |
| Platelet-activating factor acetylhydrolase IB subunit beta OS=Homo sapiens GN=PAFAH1B2 PE=1 SV=1      | PA1B2_HUMAN  | 26 kDa  | 0 | 0 | 1 | 0 |
| PH domain leucine-rich repeat-containing protein phosphatase 1 OS=Homo sapiens GN=PHLPP1 PE=1 SV=1    | PHLP1_HUMAN  | 185 kDa | 0 | 0 | 1 | 0 |
| Polycystin-2 OS=Homo sapiens GN=PKD2 PE=1 SV=3                                                        | PKD2_HUMAN   | 110 kDa | 0 | 0 | 1 | 0 |
| Serine/threonine-protein phosphatase 2B catalytic subunit alpha isoform OS=Homo sapiens GN=PPP3CA P   | PPP2BA_HUMAN | 59 kDa  | 0 | 0 | 1 | 0 |
| Lysosomal acid phosphatase OS=Homo sapiens GN=ACP2 PE=1 SV=3                                          | PPAL_HUMAN   | 48 kDa  | 0 | 0 | 1 | 0 |
| Basic salivary proline-rich protein 3 OS=Homo sapiens GN=PRB3 PE=1 SV=2                               | PRB3_HUMAN   | 31 kDa  | 0 | 0 | 1 | 0 |
| Polypyrimidine tract-binding protein 2 OS=Homo sapiens GN=PTBP2 PE=1 SV=1                             | PTBP2_HUMAN  | 57 kDa  | 0 | 0 | 1 | 0 |

|                                                                                          |             |         |   |   |   |   |
|------------------------------------------------------------------------------------------|-------------|---------|---|---|---|---|
| Putative Ras GTPase-activating protein 4B OS=Homo sapiens GN=RASA4B PE=5 SV=2            | RAS4B_HUMAN | 90 kDa  | 0 | 0 | 1 | 0 |
| Prorolaxin H2 OS=Homo sapiens GN=RLN2 PE=1 SV=1                                          | REL2_HUMAN  | 21 kDa  | 0 | 0 | 1 | 0 |
| Rab11 family-interacting protein 3 OS=Homo sapiens GN=RAB11FIP3 PE=1 SV=1                | RFIP3_HUMAN | 82 kDa  | 0 | 0 | 1 | 0 |
| 60S acidic ribosomal protein P0 OS=Homo sapiens GN=RPLP0 PE=1 SV=1                       | RLA0_HUMAN  | 34 kDa  | 0 | 0 | 1 | 0 |
| Protein S100-A2 OS=Homo sapiens GN=S100A2 PE=1 SV=3                                      | S10A2_HUMAN | 11 kDa  | 0 | 0 | 1 | 0 |
| Solute carrier family 25 member 52 OS=Homo sapiens GN=SLC25A52 PE=1 SV=2                 | S2552_HUMAN | 34 kDa  | 0 | 0 | 1 | 0 |
| Long-chain fatty acid transport protein 3 OS=Homo sapiens GN=SLC27A3 PE=2 SV=3           | S27A3_HUMAN | 79 kDa  | 0 | 0 | 1 | 0 |
| Selenoprotein P OS=Homo sapiens GN=SEPP1 PE=1 SV=3                                       | SEPP1_HUMAN | 43 kDa  | 0 | 0 | 1 | 0 |
| Small nuclear ribonucleoprotein Sm D1 OS=Homo sapiens GN=SNRPD1 PE=1 SV=1                | SMD1_HUMAN  | 13 kDa  | 0 | 0 | 1 | 0 |
| Transcription factor Sp8 OS=Homo sapiens GN=SP8 PE=2 SV=3                                | SP8_HUMAN   | 49 kDa  | 0 | 0 | 1 | 0 |
| Protein sprouty homolog 3 OS=Homo sapiens GN=SPRY3 PE=1 SV=2                             | SPY3_HUMAN  | 31 kDa  | 0 | 0 | 1 | 0 |
| Ankyrin repeat domain-containing protein SOWAHB OS=Homo sapiens GN=SOWAHB PE=2 SV=1      | SWAHB_HUMAN | 86 kDa  | 0 | 0 | 1 | 0 |
| T-box transcription factor TBX15 OS=Homo sapiens GN=TBX15 PE=2 SV=2                      | TBX15_HUMAN | 66 kDa  | 0 | 0 | 1 | 0 |
| Trimeric intracellular cation channel type B OS=Homo sapiens GN=TMEM38B PE=1 SV=1        | TM38B_HUMAN | 33 kDa  | 0 | 0 | 1 | 0 |
| Transmembrane protein 39B OS=Homo sapiens GN=TMEM39B PE=2 SV=1                           | TM39B_HUMAN | 56 kDa  | 0 | 0 | 1 | 0 |
| Protein turtle homolog A OS=Homo sapiens GN=IGSF9 PE=1 SV=2                              | TUTLA_HUMAN | 127 kDa | 0 | 0 | 1 | 0 |
| Twisted gastrulation protein homolog 1 OS=Homo sapiens GN=TWSG1 PE=2 SV=1                | TWSG1_HUMAN | 25 kDa  | 0 | 0 | 1 | 0 |
| Ubiquitin-like domain-containing CTD phosphatase 1 OS=Homo sapiens GN=UBLCP1 PE=1 SV=2   | UBCP1_HUMAN | 37 kDa  | 0 | 0 | 1 | 0 |
| 5'-3' exoribonuclease 2 OS=Homo sapiens GN=XRN2 PE=1 SV=1                                | XRN2_HUMAN  | 109 kDa | 0 | 0 | 1 | 0 |
| Zinc finger protein 324A OS=Homo sapiens GN=ZNF324 PE=1 SV=1                             | Z324A_HUMAN | 61 kDa  | 0 | 0 | 1 | 0 |
| Transmembrane protein 190 OS=Homo sapiens GN=TMEM190 PE=2 SV=1                           | TM190_HUMAN | 19 kDa  | 0 | 0 | 1 | 0 |
| TBC1 domain family member 16 OS=Homo sapiens GN=TBC1D16 PE=1 SV=1                        | TBC16_HUMAN | 86 kDa  | 0 | 0 | 1 | 0 |
| HMG box-containing protein 1 OS=Homo sapiens GN=HBP1 PE=1 SV=2                           | HBP1_HUMAN  | 58 kDa  | 0 | 1 | 0 | 0 |
| SHC-transforming protein 4 OS=Homo sapiens GN=SHC4 PE=1 SV=1                             | SHC4_HUMAN  | 69 kDa  | 0 | 0 | 1 | 0 |
| Transmembrane emp24 domain-containing protein 9 OS=Homo sapiens GN=TMED9 PE=1 SV=2       | TMED9_HUMAN | 27 kDa  | 0 | 0 | 1 | 0 |
| BTB/POZ domain-containing protein KCTD4 OS=Homo sapiens GN=KCTD4 PE=2 SV=2               | KCTD4_HUMAN | 30 kDa  | 0 | 0 | 1 | 0 |
| V-set and transmembrane domain-containing protein 1 OS=Homo sapiens GN=VSTM1 PE=1 SV=2   | VSTM1_HUMAN | 26 kDa  | 0 | 0 | 1 | 0 |
| Probable G-protein coupled receptor 133 OS=Homo sapiens GN=GPR133 PE=2 SV=1              | GP133_HUMAN | 97 kDa  | 0 | 0 | 1 | 0 |
| Uncharacterized protein C21orf56 OS=Homo sapiens GN=C21orf56 PE=2 SV=3                   | CU056_HUMAN | 38 kDa  | 0 | 0 | 1 | 0 |
| Interleukin-1 receptor type 1 OS=Homo sapiens GN=IL1R1 PE=1 SV=1                         | IL1R1_HUMAN | 65 kDa  | 0 | 0 | 0 | 1 |
| Ammonium transporter Rh type C OS=Homo sapiens GN=RHCG PE=1 SV=1                         | RHCG_HUMAN  | 53 kDa  | 0 | 0 | 0 | 1 |
| Membralin OS=Homo sapiens GN=C19orf6 PE=1 SV=1                                           | MBRL_HUMAN  | 68 kDa  | 0 | 0 | 1 | 0 |
| Protein LDOC1L OS=Homo sapiens GN=LDOC1L PE=2 SV=1                                       | LDOCL_HUMAN | 26 kDa  | 0 | 0 | 1 | 0 |
| Metallothionein-2 OS=Homo sapiens GN=MT2A PE=1 SV=1                                      | MT2_HUMAN   | 6 kDa   | 0 | 1 | 0 | 0 |
| DnaJ homolog subfamily B member 13 OS=Homo sapiens GN=DNAJB13 PE=2 SV=1                  | DJB13_HUMAN | 36 kDa  | 0 | 0 | 0 | 1 |
| Frizzled-3 OS=Homo sapiens GN=FZD3 PE=1 SV=1                                             | FZD3_HUMAN  | 76 kDa  | 0 | 0 | 0 | 1 |
| Far upstream element-binding protein 1 OS=Homo sapiens GN=FUBP1 PE=1 SV=3                | FUBP1_HUMAN | 68 kDa  | 0 | 1 | 0 | 0 |
| Glycosyltransferase-like domain-containing protein 1 OS=Homo sapiens GN=GTDC1 PE=2 SV=1  | GTDC1_HUMAN | 53 kDa  | 0 | 0 | 1 | 0 |
| ATP-sensitive inward rectifier potassium channel 12 OS=Homo sapiens GN=KCNJ12 PE=1 SV=2  | IRK12_HUMAN | 49 kDa  | 0 | 0 | 1 | 0 |
| Actin filament-associated protein 1-like 1 OS=Homo sapiens GN=AFAP1L1 PE=1 SV=2          | AF1L1_HUMAN | 86 kDa  | 0 | 0 | 1 | 0 |
| Transthyretin OS=Homo sapiens GN=TTR PE=1 SV=1                                           | TTHY_HUMAN  | 16 kDa  | 0 | 0 | 0 | 1 |
| NKG2-D type II integral membrane protein OS=Homo sapiens GN=KLK1 PE=1 SV=1               | NKG2D_HUMAN | 25 kDa  | 0 | 1 | 0 | 0 |
| Protocadherin alpha-11 OS=Homo sapiens GN=PCDHA11 PE=2 SV=1                              | PCDAB_HUMAN | 103 kDa | 0 | 1 | 0 | 0 |
| Putative uncharacterized protein MGC34800 OS=Homo sapiens PE=2 SV=1                      | YP021_HUMAN | 17 kDa  | 0 | 0 | 0 | 1 |
| Glutamate receptor, ionotropic kainate 5 OS=Homo sapiens GN=GRIK5 PE=2 SV=2              | GRIK5_HUMAN | 109 kDa | 0 | 0 | 1 | 0 |
| Optic atrophy 3 protein OS=Homo sapiens GN=OPA3 PE=1 SV=1                                | OPA3_HUMAN  | 20 kDa  | 0 | 1 | 0 | 0 |
| Endophilin-A3 OS=Homo sapiens GN=SH3GL3 PE=1 SV=1                                        | SH3G3_HUMAN | 39 kDa  | 0 | 0 | 1 | 0 |
| Serine/threonine-protein kinase Nek3 OS=Homo sapiens GN=NEK3 PE=1 SV=2                   | NEK3_HUMAN  | 58 kDa  | 0 | 0 | 1 | 0 |
| Uncharacterized protein C14orf118 OS=Homo sapiens GN=C14orf118 PE=1 SV=3                 | CN118_HUMAN | 54 kDa  | 0 | 0 | 1 | 0 |
| Zinc finger SWIM domain-containing protein 3 OS=Homo sapiens GN=ZSWIM3 PE=1 SV=2         | ZSWM3_HUMAN | 79 kDa  | 0 | 0 | 1 | 0 |
| Potassium voltage-gated channel subfamily H member 2 OS=Homo sapiens GN=KCNH2 PE=1 SV=1  | KCNH2_HUMAN | 127 kDa | 0 | 0 | 1 | 0 |
| Mas-related G-protein coupled receptor member D OS=Homo sapiens GN=MRGPRD PE=2 SV=1      | MRGRD_HUMAN | 36 kDa  | 0 | 0 | 0 | 1 |
| Histamine H4 receptor OS=Homo sapiens GN=HRH4 PE=1 SV=2                                  | HRH4_HUMAN  | 44 kDa  | 0 | 0 | 1 | 0 |
| Olfactory receptor 5V1 OS=Homo sapiens GN=OR5V1 PE=2 SV=1                                | OR5V1_HUMAN | 36 kDa  | 0 | 0 | 1 | 0 |
| Cytochrome P450 4A11 OS=Homo sapiens GN=CYP4A11 PE=1 SV=1                                | CP4A8_HUMAN | 59 kDa  | 0 | 1 | 0 | 0 |
| Serine/arginine-rich splicing factor 4 OS=Homo sapiens GN=SRSF4 PE=1 SV=2                | SRSF4_HUMAN | 57 kDa  | 0 | 0 | 0 | 1 |
| Putative 60S ribosomal protein L36-like 1 OS=Homo sapiens PE=5 SV=1                      | RL36X_HUMAN | 12 kDa  | 0 | 0 | 0 | 1 |
| Translation initiation factor IF-3, mitochondrial OS=Homo sapiens GN=MTIF3 PE=1 SV=4     | IF3M_HUMAN  | 32 kDa  | 0 | 1 | 0 | 0 |
| Thromboxane A2 receptor OS=Homo sapiens GN=TBXA2R PE=1 SV=3                              | TA2R_HUMAN  | 37 kDa  | 0 | 0 | 1 | 0 |
| Caspase-1 OS=Homo sapiens GN=CASP1 PE=1 SV=1                                             | CASP1_HUMAN | 45 kDa  | 0 | 0 | 0 | 1 |
| Mitochondrial-processing peptidase subunit alpha OS=Homo sapiens GN=PMPPCA PE=1 SV=2     | MPPA_HUMAN  | 58 kDa  | 0 | 0 | 1 | 0 |
| Ubiquitin-conjugating enzyme E2 R2 OS=Homo sapiens GN=UBE2R2 PE=1 SV=1                   | UB2R2_HUMAN | 27 kDa  | 0 | 0 | 1 | 0 |
| MAP7 domain-containing protein 2 OS=Homo sapiens GN=MAP7D2 PE=1 SV=2                     | MA7D2_HUMAN | 82 kDa  | 0 | 0 | 0 | 1 |
| CDK5 and ABL1 enzyme substrate 1 OS=Homo sapiens GN=CABLES1 PE=1 SV=2                    | CABL1_HUMAN | 68 kDa  | 0 | 0 | 1 | 0 |
| Zinc finger protein 610 OS=Homo sapiens GN=ZNF610 PE=2 SV=2                              | ZN610_HUMAN | 53 kDa  | 0 | 0 | 1 | 0 |
| Sentrin-specific protease 1 OS=Homo sapiens GN=SEN1 PE=1 SV=2                            | SEN1_HUMAN  | 73 kDa  | 0 | 0 | 0 | 1 |
| Amiloride-sensitive sodium channel subunit delta OS=Homo sapiens GN=SCNN1D PE=1 SV=2     | SCNND_HUMAN | 70 kDa  | 0 | 0 | 1 | 0 |
| Ribulose-phosphate 3-epimerase OS=Homo sapiens GN=RPE PE=1 SV=1                          | RPE_HUMAN   | 25 kDa  | 0 | 0 | 0 | 1 |
| Anamorsin OS=Homo sapiens GN=CIAPIN1 PE=1 SV=2                                           | CPIN1_HUMAN | 34 kDa  | 0 | 0 | 0 | 1 |
| Zinc finger protein 551 OS=Homo sapiens GN=ZNF551 PE=1 SV=3                              | ZN551_HUMAN | 78 kDa  | 0 | 0 | 0 | 1 |
| Forkhead box protein B2 OS=Homo sapiens GN=FOXB2 PE=2 SV=1                               | FOXB2_HUMAN | 46 kDa  | 0 | 0 | 0 | 1 |
| Enkurin OS=Homo sapiens GN=ENKUR PE=2 SV=1                                               | ENKUR_HUMAN | 29 kDa  | 0 | 0 | 0 | 1 |
| Gamma-butyrobetaine dioxygenase OS=Homo sapiens GN=BBOX1 PE=1 SV=1                       | BODG_HUMAN  | 45 kDa  | 0 | 1 | 0 | 0 |
| WD repeat and FYVE domain-containing protein 2 OS=Homo sapiens GN=WDFY2 PE=2 SV=2        | WDFY2_HUMAN | 45 kDa  | 0 | 0 | 1 | 0 |
| Epithelial splicing regulatory protein 2 OS=Homo sapiens GN=ESRP2 PE=1 SV=1              | ESRP2_HUMAN | 78 kDa  | 0 | 0 | 1 | 0 |
| Protein Wnt-2b OS=Homo sapiens GN=WNT2B PE=1 SV=2                                        | WNT2B_HUMAN | 44 kDa  | 0 | 0 | 1 | 0 |
| Zinc finger protein 583 OS=Homo sapiens GN=ZNF583 PE=2 SV=2                              | ZN583_HUMAN | 66 kDa  | 0 | 0 | 1 | 0 |
| Protein strawberry notch homolog 1 OS=Homo sapiens GN=SBNO1 PE=1 SV=1                    | SBNO1_HUMAN | 154 kDa | 0 | 1 | 0 | 0 |
| Ras-GEF domain-containing family member 1C OS=Homo sapiens GN=RASGEF1C PE=2 SV=2         | RGF1C_HUMAN | 53 kDa  | 0 | 1 | 0 | 0 |
| Eukaryotic translation initiation factor 4E type 1B OS=Homo sapiens GN=EIF4E1B PE=2 SV=3 | I4E1B_HUMAN | 28 kDa  | 0 | 1 | 0 | 0 |
| TBC1 domain family member 8B OS=Homo sapiens GN=TBC1D8B PE=2 SV=2                        | TBC8B_HUMAN | 129 kDa | 0 | 0 | 1 | 0 |
| Nephrocystin-4 OS=Homo sapiens GN=NPHP4 PE=1 SV=2                                        | NPHP4_HUMAN | 158 kDa | 0 | 0 | 1 | 0 |

|                                                                                                      |              |         |   |   |   |   |
|------------------------------------------------------------------------------------------------------|--------------|---------|---|---|---|---|
| Protocadherin alpha-13 OS=Homo sapiens GN=PCDHA13 PE=2 SV=1                                          | PCDAD_HUMAN  | 102 kDa | 0 | 0 | 1 | 0 |
| Programmed cell death protein 10 OS=Homo sapiens GN=PDCD10 PE=1 SV=1                                 | PDC10_HUMAN  | 25 kDa  | 0 | 1 | 0 | 0 |
| Uncharacterized protein C17orf102 OS=Homo sapiens GN=C17orf102 PE=2 SV=1                             | CQ102_HUMAN  | 18 kDa  | 0 | 1 | 0 | 0 |
| Ubiquitin carboxyl-terminal hydrolase 51 OS=Homo sapiens GN=USP51 PE=2 SV=1                          | UBP51_HUMAN  | 80 kDa  | 0 | 0 | 0 | 1 |
| Angiogenic factor with G patch and FHA domains 1 OS=Homo sapiens GN=AGGF1 PE=1 SV=2                  | AGGF1_HUMAN  | 81 kDa  | 0 | 1 | 0 | 0 |
| DNA repair protein XRCC3 OS=Homo sapiens GN=XRCC3 PE=1 SV=1                                          | XRCC3_HUMAN  | 38 kDa  | 0 | 0 | 0 | 1 |
| P2X purinoceptor 2 OS=Homo sapiens GN=P2RX2 PE=2 SV=1                                                | P2RX2_HUMAN  | 52 kDa  | 0 | 1 | 0 | 0 |
| Tetrapeptide repeat protein 38 OS=Homo sapiens GN=TTC38 PE=1 SV=1                                    | TTC38_HUMAN  | 53 kDa  | 0 | 0 | 1 | 0 |
| Myosin light chain 4 OS=Homo sapiens GN=MYL4 PE=1 SV=3                                               | MYL4_HUMAN   | 22 kDa  | 0 | 0 | 1 | 0 |
| Phosphatidylinositol 5-phosphate 4-kinase type-2 beta OS=Homo sapiens GN=PIP4K2B PE=1 SV=1           | PI42B_HUMAN  | 47 kDa  | 0 | 0 | 0 | 1 |
| Relaxin-3 receptor 2 OS=Homo sapiens GN=RXFP4 PE=1 SV=1                                              | RL3R2_HUMAN  | 41 kDa  | 0 | 0 | 1 | 0 |
| WD repeat-containing protein 49 OS=Homo sapiens GN=WDR49 PE=1 SV=1                                   | WDR49_HUMAN  | 79 kDa  | 0 | 0 | 1 | 0 |
| 60S ribosomal protein L26 OS=Homo sapiens GN=RPL26 PE=1 SV=1                                         | RL26_HUMAN   | 17 kDa  | 0 | 1 | 0 | 0 |
| Zinc finger and BTB domain-containing protein 43 OS=Homo sapiens GN=ZBTB43 PE=1 SV=1                 | ZBT43_HUMAN  | 53 kDa  | 0 | 0 | 1 | 0 |
| Uncharacterized protein C17orf64 OS=Homo sapiens GN=C17orf64 PE=2 SV=2                               | CQ064_HUMAN  | 27 kDa  | 0 | 0 | 1 | 0 |
| Histone deacetylase 10 OS=Homo sapiens GN=HDAC10 PE=1 SV=1                                           | HDA10_HUMAN  | 71 kDa  | 0 | 0 | 1 | 0 |
| Gamma-glutamylcyclotransferase OS=Homo sapiens GN=GGCT PE=1 SV=1                                     | GGCT_HUMAN   | 21 kDa  | 0 | 1 | 0 | 0 |
| DNA repair protein RAD51 homolog 2 OS=Homo sapiens GN=RAD51B PE=1 SV=2                               | RA51B_HUMAN  | 42 kDa  | 0 | 0 | 0 | 1 |
| U1 small nuclear ribonucleoprotein C OS=Homo sapiens GN=SNRPC PE=1 SV=1                              | RU1C_HUMAN   | 17 kDa  | 0 | 0 | 1 | 0 |
| Protein phosphatase 1 regulatory subunit 11 OS=Homo sapiens GN=PPP1R11 PE=1 SV=1                     | PP1RB_HUMAN  | 14 kDa  | 0 | 1 | 0 | 0 |
| GRAM domain-containing protein 3 OS=Homo sapiens GN=GRAMD3 PE=1 SV=1                                 | GRAM3_HUMAN  | 48 kDa  | 0 | 1 | 0 | 0 |
| V-type proton ATPase subunit d 1 OS=Homo sapiens GN=ATP6V0D1 PE=1 SV=1                               | VAOD1_HUMAN  | 40 kDa  | 0 | 0 | 1 | 0 |
| Rho-related GTP-binding protein Rho6 OS=Homo sapiens GN=RND1 PE=1 SV=1                               | RND1_HUMAN   | 26 kDa  | 0 | 0 | 1 | 0 |
| MHC class II regulatory factor RFX1 OS=Homo sapiens GN=RFX1 PE=1 SV=2                                | RFX1_HUMAN   | 105 kDa | 0 | 1 | 0 | 0 |
| Neutral amino acid transporter B(0) OS=Homo sapiens GN=SLC1A5 PE=1 SV=2                              | AAAT_HUMAN   | 57 kDa  | 0 | 0 | 0 | 1 |
| Olfactory receptor 52E8 OS=Homo sapiens GN=OR52E8 PE=1 SV=3                                          | OS2E8_HUMAN  | 36 kDa  | 0 | 0 | 0 | 1 |
| Peroxisomal sarcosine oxidase OS=Homo sapiens GN=PIPOX PE=2 SV=2                                     | SOX_HUMAN    | 44 kDa  | 0 | 1 | 0 | 0 |
| Lethal(3)malignant brain tumor-like protein 3 OS=Homo sapiens GN=L3MBTL3 PE=1 SV=2                   | LMBL3_HUMAN  | 88 kDa  | 0 | 0 | 1 | 0 |
| ER membrane protein complex subunit 7 OS=Homo sapiens GN=EMC7 PE=1 SV=1                              | EMC7_HUMAN   | 26 kDa  | 0 | 0 | 1 | 0 |
| NKG2D ligand 4 OS=Homo sapiens GN=RAET1E PE=1 SV=1                                                   | N2DL4_HUMAN  | 30 kDa  | 0 | 0 | 1 | 0 |
| Hornerin OS=Homo sapiens GN=HRNR PE=1 SV=2                                                           | HORN_HUMAN   | 282 kDa | 0 | 0 | 1 | 0 |
| Endonuclease domain-containing 1 protein OS=Homo sapiens GN=ENDOD1 PE=1 SV=2                         | ENDD1_HUMAN  | 55 kDa  | 0 | 0 | 0 | 1 |
| Metallophosphoesterase domain-containing protein 1 OS=Homo sapiens GN=MPPED1 PE=2 SV=3               | MPPD1_HUMAN  | 37 kDa  | 0 | 0 | 0 | 1 |
| Lathosterol oxidase OS=Homo sapiens GN=SCSDL PE=1 SV=2                                               | SCSD_HUMAN   | 35 kDa  | 0 | 0 | 1 | 0 |
| Protein FAM133B OS=Homo sapiens GN=FAM133B PE=1 SV=1                                                 | F133B_HUMAN  | 28 kDa  | 0 | 0 | 1 | 0 |
| Beta-defensin 118 OS=Homo sapiens GN=DEFB118 PE=2 SV=1                                               | DB118_HUMAN  | 14 kDa  | 0 | 0 | 1 | 0 |
| Nicotinamide N-methyltransferase OS=Homo sapiens GN=NNMT PE=1 SV=1                                   | NNMT_HUMAN   | 30 kDa  | 0 | 0 | 0 | 1 |
| Complement factor H-related protein 2 OS=Homo sapiens GN=CFHR2 PE=1 SV=1                             | FHR2_HUMAN   | 31 kDa  | 0 | 0 | 0 | 1 |
| Protein Niban OS=Homo sapiens GN=FAM129A PE=1 SV=1                                                   | NIBAN_HUMAN  | 103 kDa | 0 | 0 | 1 | 0 |
| Hepatitis B virus X-interacting protein OS=Homo sapiens GN=HBXIP PE=1 SV=1                           | HBXIP_HUMAN  | 10 kDa  | 0 | 0 | 1 | 0 |
| Cysteine-rich hydrophobic domain 1 protein OS=Homo sapiens GN=CHIC1 PE=2 SV=2                        | CHIC1_HUMAN  | 26 kDa  | 0 | 0 | 1 | 0 |
| HSPB1-associated protein 1 OS=Homo sapiens GN=HSPBAP1 PE=1 SV=1                                      | HBAP1_HUMAN  | 55 kDa  | 0 | 0 | 1 | 0 |
| Protocadherin-7 OS=Homo sapiens GN=PCDH7 PE=1 SV=2                                                   | PCDH7_HUMAN  | 116 kDa | 0 | 0 | 1 | 0 |
| Ras-related protein Rab-19 OS=Homo sapiens GN=RAB19 PE=2 SV=2                                        | RAB19_HUMAN  | 24 kDa  | 0 | 0 | 1 | 0 |
| Rab GDP dissociation inhibitor alpha OS=Homo sapiens GN=GDI1 PE=1 SV=2                               | GDI1_HUMAN   | 51 kDa  | 0 | 1 | 0 | 0 |
| Eukaryotic peptide chain release factor GTP-binding subunit ERF3A OS=Homo sapiens GN=GSPT1 PE=1 SV=1 | ERF3A_HUMAN  | 56 kDa  | 0 | 0 | 1 | 0 |
| Putative speedy protein E5 OS=Homo sapiens GN=SPDYE5 PE=5 SV=2                                       | SPDE5_HUMAN  | 40 kDa  | 0 | 0 | 1 | 0 |
| Epsilon-sarcoglycan OS=Homo sapiens GN=SGCE PE=1 SV=6                                                | SGCE_HUMAN   | 50 kDa  | 0 | 0 | 1 | 0 |
| Dual specificity protein phosphatase 15 OS=Homo sapiens GN=DUSP15 PE=1 SV=4                          | DUS15_HUMAN  | 32 kDa  | 0 | 0 | 1 | 0 |
| Cyclin-dependent kinase 8 OS=Homo sapiens GN=CDK8 PE=1 SV=1                                          | CDK8_HUMAN   | 53 kDa  | 0 | 0 | 1 | 0 |
| Optineurin OS=Homo sapiens GN=OPTN PE=1 SV=2                                                         | OPTN_HUMAN   | 66 kDa  | 0 | 1 | 0 | 0 |
| PAX-interacting protein 1 OS=Homo sapiens GN=PAXIP1 PE=1 SV=2                                        | PAXI1_HUMAN  | 121 kDa | 0 | 0 | 1 | 0 |
| THAP domain-containing protein 5 OS=Homo sapiens GN=THAP5 PE=1 SV=2                                  | THAP5_HUMAN  | 45 kDa  | 0 | 0 | 1 | 0 |
| RPE-retinal G protein-coupled receptor OS=Homo sapiens GN=RGR PE=1 SV=1                              | RGR_HUMAN    | 32 kDa  | 0 | 0 | 0 | 1 |
| Alcohol dehydrogenase class 4 mu/sigma chain OS=Homo sapiens GN=ADH7 PE=1 SV=2                       | ADH7_HUMAN   | 41 kDa  | 0 | 0 | 1 | 0 |
| Toll-like receptor 2 OS=Homo sapiens GN=TLR2 PE=1 SV=1                                               | TLR2_HUMAN   | 90 kDa  | 0 | 0 | 1 | 0 |
| Interleukin-36 alpha OS=Homo sapiens GN=IL36A PE=1 SV=1                                              | IL36A_HUMAN  | 18 kDa  | 0 | 0 | 1 | 0 |
| Probable C->U-editing enzyme APOBEC-2 OS=Homo sapiens GN=APOBEC2 PE=1 SV=1                           | ABEC2_HUMAN  | 26 kDa  | 0 | 0 | 1 | 0 |
| Regulator of G-protein signaling 19 OS=Homo sapiens GN=RGS19 PE=1 SV=1                               | RGS19_HUMAN  | 25 kDa  | 0 | 1 | 0 | 0 |
| Puromycin-sensitive aminopeptidase-like protein OS=Homo sapiens GN=NPEPPSL1 PE=2 SV=3                | PSAL_HUMAN   | 54 kDa  | 0 | 0 | 0 | 1 |
| Sentrin-specific protease 5 OS=Homo sapiens GN=SENPS PE=1 SV=3                                       | SENPS_HUMAN  | 87 kDa  | 0 | 1 | 0 | 0 |
| Vacuolar protein sorting-associated protein 33B OS=Homo sapiens GN=VPS33B PE=1 SV=2                  | VP33B_HUMAN  | 71 kDa  | 0 | 1 | 0 | 0 |
| Protein FAM86A OS=Homo sapiens GN=FAM86A PE=2 SV=2                                                   | FA86A_HUMAN  | 37 kDa  | 0 | 1 | 0 | 0 |
| Olfactory receptor 10K1 OS=Homo sapiens GN=OR10K1 PE=2 SV=1                                          | O10K1_HUMAN  | 35 kDa  | 0 | 0 | 0 | 1 |
| Zinc finger protein ubi-d4 OS=Homo sapiens GN=DPF2 PE=1 SV=2                                         | REQU_HUMAN   | 44 kDa  | 0 | 1 | 0 | 0 |
| Thymus-specific serine protease OS=Homo sapiens GN=PRSS16 PE=2 SV=2                                  | TSSP_HUMAN   | 55 kDa  | 0 | 0 | 0 | 1 |
| Signal transducer and activator of transcription 6 OS=Homo sapiens GN=STAT6 PE=1 SV=1                | STAT6_HUMAN  | 94 kDa  | 0 | 1 | 0 | 0 |
| POU domain, class 3, transcription factor 3 OS=Homo sapiens GN=POU3F3 PE=2 SV=2                      | PO3F3_HUMAN  | 50 kDa  | 0 | 0 | 0 | 1 |
| Protein FAM149A OS=Homo sapiens GN=FAM149A PE=2 SV=2                                                 | F149A_HUMAN  | 83 kDa  | 0 | 1 | 0 | 0 |
| Dual specificity protein phosphatase CDC14A OS=Homo sapiens GN=CDC14A PE=1 SV=1                      | CC14A_HUMAN  | 67 kDa  | 0 | 1 | 0 | 0 |
| Cardiac phospholamban OS=Homo sapiens GN=PLN PE=1 SV=1                                               | PPLA_HUMAN   | 6 kDa   | 0 | 0 | 1 | 0 |
| Inactive serine protease PAMR1 OS=Homo sapiens GN=PAMR1 PE=1 SV=1                                    | PAMR1_HUMAN  | 80 kDa  | 0 | 0 | 0 | 1 |
| Replication factor C subunit 3 OS=Homo sapiens GN=RFC3 PE=1 SV=2                                     | RFC3_HUMAN   | 41 kDa  | 0 | 0 | 1 | 0 |
| Alpha-1,3-mannosyl-glycoprotein 4-beta-N-acetylglucosaminyltransferase C OS=Homo sapiens GN=MGAT4C   | MGAT4C_HUMAN | 56 kDa  | 0 | 1 | 0 | 0 |
| Pendrin OS=Homo sapiens GN=SLC26A4 PE=1 SV=1                                                         | S26A4_HUMAN  | 86 kDa  | 0 | 1 | 0 | 0 |
| GTP-binding protein 5 OS=Homo sapiens GN=GTPBP5 PE=2 SV=1                                            | GTPB5_HUMAN  | 44 kDa  | 0 | 0 | 1 | 0 |
| Carboxylesterase 4A OS=Homo sapiens GN=CE54A PE=2 SV=2                                               | EST4A_HUMAN  | 64 kDa  | 0 | 0 | 1 | 0 |
| Alpha-2A adrenergic receptor OS=Homo sapiens GN=ADRA2A PE=1 SV=3                                     | ADA2A_HUMAN  | 49 kDa  | 0 | 0 | 1 | 0 |
| Putative uncharacterized protein C1orf98 OS=Homo sapiens GN=C1orf98 PE=2 SV=1                        | CA098_HUMAN  | 10 kDa  | 0 | 1 | 0 | 0 |
| Arfaptin-1 OS=Homo sapiens GN=ARFIP1 PE=1 SV=2                                                       | ARFP1_HUMAN  | 42 kDa  | 0 | 0 | 1 | 0 |
| Cholesteryl ester transfer protein OS=Homo sapiens GN=CETP PE=1 SV=2                                 | CETP_HUMAN   | 55 kDa  | 0 | 1 | 0 | 0 |
| Charged multivesicular body protein 2a OS=Homo sapiens GN=CHMP2A PE=1 SV=1                           | CHM2A_HUMAN  | 25 kDa  | 0 | 0 | 1 | 0 |

|                                                                                                   |             |         |   |   |   |   |
|---------------------------------------------------------------------------------------------------|-------------|---------|---|---|---|---|
| Spindle and centriole-associated protein 1 OS=Homo sapiens GN=SPICE1 PE=1 SV=1                    | SPICE_HUMAN | 96 kDa  | 0 | 0 | 1 | 0 |
| Cystatin-A OS=Homo sapiens GN=CSTA PE=1 SV=1                                                      | CYTA_HUMAN  | 11 kDa  | 0 | 0 | 1 | 0 |
| Mediator of RNA polymerase II transcription subunit 26 OS=Homo sapiens GN=MED26 PE=1 SV=2         | MED26_HUMAN | 65 kDa  | 0 | 1 | 0 | 0 |
| Transcription factor AP-2-beta OS=Homo sapiens GN=TFAP2B PE=1 SV=2                                | AP2B_HUMAN  | 50 kDa  | 0 | 0 | 1 | 0 |
| Zinc finger protein 233 OS=Homo sapiens GN=ZNF233 PE=2 SV=3                                       | ZN233_HUMAN | 77 kDa  | 0 | 1 | 0 | 0 |
| Forkhead box protein I1 OS=Homo sapiens GN=FOXI1 PE=2 SV=3                                        | FOXI1_HUMAN | 41 kDa  | 0 | 0 | 1 | 0 |
| P2Y purinoceptor 1 OS=Homo sapiens GN=P2RY1 PE=1 SV=1                                             | P2RY1_HUMAN | 42 kDa  | 0 | 1 | 0 | 0 |
| Dipeptidase 2 OS=Homo sapiens GN=DPEP2 PE=1 SV=2                                                  | DPEP2_HUMAN | 53 kDa  | 0 | 0 | 0 | 1 |
| E3 ubiquitin-protein ligase MIB2 OS=Homo sapiens GN=MIB2 PE=1 SV=3                                | MIB2_HUMAN  | 110 kDa | 0 | 0 | 0 | 1 |
| Phosphatidylinositol 5-phosphate 4-kinase type-2 alpha OS=Homo sapiens GN=PIP4K2A PE=1 SV=2       | PI42A_HUMAN | 46 kDa  | 0 | 1 | 0 | 0 |
| Polypeptide N-acetylgalactosaminyltransferase 6 OS=Homo sapiens GN=GALNT6 PE=2 SV=2               | GALT6_HUMAN | 71 kDa  | 0 | 0 | 1 | 0 |
| Uncharacterized protein C1orf115 OS=Homo sapiens GN=C1orf115 PE=2 SV=1                            | CA115_HUMAN | 16 kDa  | 0 | 1 | 0 | 0 |
| Zinc finger protein 273 OS=Homo sapiens GN=ZNF273 PE=2 SV=3                                       | ZN273_HUMAN | 65 kDa  | 0 | 1 | 0 | 0 |
| Pancreatic lipase-related protein 1 OS=Homo sapiens GN=PNLIPRP1 PE=1 SV=1                         | LIPR1_HUMAN | 52 kDa  | 0 | 0 | 1 | 0 |
| HERV-K_22q11.21 provirus ancestral Gag polyprotein OS=Homo sapiens PE=1 SV=2                      | GAK11_HUMAN | 74 kDa  | 0 | 1 | 0 | 0 |
| Mannosyl-oligosaccharide 1,2-alpha-mannosidase IA OS=Homo sapiens GN=MAN1A1 PE=1 SV=3             | MA1A1_HUMAN | 73 kDa  | 0 | 0 | 1 | 0 |
| Cancer-associated gene 1 protein OS=Homo sapiens GN=CAGE1 PE=2 SV=2                               | CAGE1_HUMAN | 90 kDa  | 0 | 1 | 0 | 0 |
| Probable tubulin polyglutamylase TLL1 OS=Homo sapiens GN=TLL1 PE=2 SV=1                           | TLL1_HUMAN  | 49 kDa  | 0 | 1 | 0 | 0 |
| Ras association domain-containing protein 1 OS=Homo sapiens GN=RASSF1 PE=1 SV=1                   | RASF1_HUMAN | 39 kDa  | 0 | 0 | 1 | 0 |
| Fanconi anemia group G protein OS=Homo sapiens GN=FANCG PE=1 SV=1                                 | FANCG_HUMAN | 69 kDa  | 0 | 0 | 1 | 0 |
| AP-1 complex subunit gamma-like 2 OS=Homo sapiens GN=AP1G2 PE=1 SV=1                              | AP1G2_HUMAN | 87 kDa  | 0 | 0 | 1 | 0 |
| Olfactory receptor 13C3 OS=Homo sapiens GN=OR13C3 PE=2 SV=2                                       | O13C3_HUMAN | 39 kDa  | 0 | 0 | 1 | 0 |
| Calcitonin OS=Homo sapiens GN=CALCA PE=1 SV=2                                                     | CALC_HUMAN  | 15 kDa  | 0 | 1 | 0 | 0 |
| Coenzyme Q-binding protein COQ10 homolog A, mitochondrial OS=Homo sapiens GN=COQ10A PE=2 SV=2     | CQ10A_HUMAN | 28 kDa  | 0 | 0 | 1 | 0 |
| Protein SSX9 OS=Homo sapiens GN=SSX9 PE=2 SV=1                                                    | SSX9_HUMAN  | 22 kDa  | 0 | 0 | 1 | 0 |
| Guanylate-binding protein 7 OS=Homo sapiens GN=GBP7 PE=2 SV=2                                     | GBP7_HUMAN  | 73 kDa  | 0 | 0 | 1 | 0 |
| Long-chain-fatty-acid--CoA ligase 6 OS=Homo sapiens GN=ACSL6 PE=2 SV=4                            | ACSL6_HUMAN | 78 kDa  | 0 | 0 | 1 | 0 |
| Pyruvate dehydrogenase E1 component subunit beta, mitochondrial OS=Homo sapiens GN=PDHB PE=1 SV=1 | ODPB_HUMAN  | 39 kDa  | 0 | 0 | 1 | 0 |
| Short-wave-sensitive opsin 1 OS=Homo sapiens GN=OPN1SW PE=1 SV=1                                  | OPSB_HUMAN  | 39 kDa  | 0 | 0 | 1 | 0 |
| Uncharacterized protein C20orf111 OS=Homo sapiens GN=C20orf111 PE=2 SV=2                          | CT111_HUMAN | 32 kDa  | 0 | 0 | 1 | 0 |
| Calcium-binding tyrosine phosphorylation-regulated protein OS=Homo sapiens GN=CABYR PE=1 SV=2     | CABYR_HUMAN | 53 kDa  | 0 | 0 | 1 | 0 |
| C-C motif chemokine 1 OS=Homo sapiens GN=CCL1 PE=1 SV=1                                           | CCL1_HUMAN  | 11 kDa  | 0 | 0 | 0 | 1 |
| Tripartite motif-containing protein 2 OS=Homo sapiens GN=TRIM2 PE=1 SV=1                          | TRIM2_HUMAN | 82 kDa  | 0 | 0 | 0 | 1 |
| Leucine-rich repeat-containing protein 16C OS=Homo sapiens GN=RLTPR PE=1 SV=2                     | LR16C_HUMAN | 155 kDa | 0 | 0 | 1 | 0 |
| Uncharacterized protein C12orf12 OS=Homo sapiens GN=C12orf12 PE=2 SV=1                            | CL012_HUMAN | 46 kDa  | 0 | 0 | 1 | 0 |
| Something about silencing protein 10 OS=Homo sapiens GN=UTP3 PE=1 SV=1                            | SAS10_HUMAN | 55 kDa  | 0 | 1 | 0 | 0 |
| GTP-binding protein Rit1 OS=Homo sapiens GN=RIT1 PE=1 SV=1                                        | RIT1_HUMAN  | 25 kDa  | 0 | 1 | 0 | 0 |
| Voltage-dependent calcium channel gamma-7 subunit OS=Homo sapiens GN=CACNG7 PE=1 SV=1             | CCG7_HUMAN  | 31 kDa  | 0 | 0 | 0 | 1 |
| NKG2-C type II integral membrane protein OS=Homo sapiens GN=KLRC2 PE=1 SV=2                       | NKG2C_HUMAN | 26 kDa  | 0 | 1 | 0 | 0 |
| Zinc finger protein 148 OS=Homo sapiens GN=ZNF148 PE=1 SV=2                                       | ZN148_HUMAN | 89 kDa  | 0 | 1 | 0 | 0 |
| Transmembrane protein 143 OS=Homo sapiens GN=TMEM143 PE=2 SV=1                                    | TM143_HUMAN | 52 kDa  | 0 | 0 | 1 | 0 |
| Peroxisomal bifunctional enzyme OS=Homo sapiens GN=EHHADH PE=1 SV=3                               | ECHP_HUMAN  | 79 kDa  | 0 | 0 | 1 | 0 |
| Anaphase-promoting complex subunit 16 OS=Homo sapiens GN=ANAPC16 PE=1 SV=1                        | APC16_HUMAN | 12 kDa  | 0 | 0 | 1 | 0 |
| ADAM DEC1 OS=Homo sapiens GN=ADAMDEC1 PE=1 SV=2                                                   | ADEC1_HUMAN | 53 kDa  | 0 | 0 | 1 | 0 |
| Mediator of RNA polymerase II transcription subunit 8 OS=Homo sapiens GN=MED8 PE=1 SV=2           | MED8_HUMAN  | 29 kDa  | 0 | 0 | 0 | 1 |
| tRNA-specific adenosine deaminase-like protein 3 OS=Homo sapiens GN=ADAT3 PE=1 SV=1               | ADAT3_HUMAN | 38 kDa  | 0 | 0 | 0 | 1 |
| Rab3 GTPase-activating protein catalytic subunit OS=Homo sapiens GN=RAB3GAP1 PE=1 SV=3            | RB3GP_HUMAN | 111 kDa | 0 | 0 | 1 | 0 |
| Putative centaurin-gamma-like family member 11P OS=Homo sapiens GN=CTGLF11P PE=5 SV=2             | CTLF8_HUMAN | 74 kDa  | 0 | 0 | 1 | 0 |
| Neuronal pentraxin receptor OS=Homo sapiens GN=NPTXR PE=2 SV=2                                    | NPTXR_HUMAN | 53 kDa  | 0 | 1 | 0 | 0 |
| 14-3-3 protein beta/alpha OS=Homo sapiens GN=YWHAB PE=1 SV=3                                      | 1433B_HUMAN | 28 kDa  | 0 | 0 | 1 | 0 |
| Macrophage colony-stimulating factor 1 OS=Homo sapiens GN=CSF1 PE=1 SV=2                          | CSF1_HUMAN  | 60 kDa  | 0 | 0 | 1 | 0 |
| Centromere protein R OS=Homo sapiens GN=ITGB3BP PE=1 SV=2                                         | CENPR_HUMAN | 20 kDa  | 0 | 0 | 1 | 0 |
| Protein C15orf2 OS=Homo sapiens GN=C15orf2 PE=2 SV=2                                              | CO002_HUMAN | 121 kDa | 0 | 0 | 0 | 1 |
| Group 3 secretory phospholipase A2 OS=Homo sapiens GN=PLA2G3 PE=1 SV=2                            | PA2G3_HUMAN | 57 kDa  | 0 | 0 | 0 | 1 |
| Adiponectin OS=Homo sapiens GN=ADIPOQ PE=1 SV=1                                                   | ADIPO_HUMAN | 26 kDa  | 0 | 0 | 0 | 1 |
| Phosphatase and actin regulator 1 OS=Homo sapiens GN=PHACTR1 PE=2 SV=3                            | PHAR1_HUMAN | 66 kDa  | 0 | 0 | 0 | 1 |
| TIP41-like protein OS=Homo sapiens GN=TIPRL PE=1 SV=2                                             | TIPRL_HUMAN | 31 kDa  | 0 | 0 | 1 | 0 |
| KISS-1 receptor OS=Homo sapiens GN=KISS1R PE=1 SV=2                                               | KISSR_HUMAN | 43 kDa  | 0 | 1 | 0 | 0 |
| Olfactory receptor 1Q1 OS=Homo sapiens GN=OR1Q1 PE=2 SV=3                                         | OR1Q1_HUMAN | 36 kDa  | 0 | 0 | 1 | 0 |
| Zeta-sarcoglycan OS=Homo sapiens GN=SGCZ PE=2 SV=1                                                | SGCZ_HUMAN  | 33 kDa  | 0 | 0 | 1 | 0 |
| Dapper homolog 3 OS=Homo sapiens GN=DACT3 PE=2 SV=2                                               | DACT3_HUMAN | 65 kDa  | 0 | 0 | 1 | 0 |
| Tubulin alpha-4A chain OS=Homo sapiens GN=TUBA4A PE=1 SV=1                                        | TBA4A_HUMAN | 50 kDa  | 0 | 0 | 0 | 1 |
| Nasopharyngeal carcinoma down-regulated gene protein 1 OS=Homo sapiens GN=NPCDR1 PE=2 SV=2        | NPCR1_HUMAN | 12 kDa  | 0 | 0 | 0 | 1 |
| Transcobalamin-2 OS=Homo sapiens GN=TCN2 PE=1 SV=3                                                | TCO2_HUMAN  | 48 kDa  | 0 | 0 | 1 | 0 |
| Serine/threonine-protein kinase DCLK1 OS=Homo sapiens GN=DCLK1 PE=1 SV=2                          | DCLK1_HUMAN | 82 kDa  | 0 | 0 | 0 | 1 |
| Ski-like protein OS=Homo sapiens GN=SKIL PE=1 SV=2                                                | SKIL_HUMAN  | 77 kDa  | 0 | 1 | 0 | 0 |
| Keratin-associated protein 19-8 OS=Homo sapiens GN=KRTAP19-8 PE=2 SV=1                            | KR198_HUMAN | 7 kDa   | 0 | 0 | 1 | 0 |
| Interleukin-28B OS=Homo sapiens GN=IL28B PE=1 SV=2                                                | IL28B_HUMAN | 22 kDa  | 0 | 0 | 0 | 1 |
| Interferon alpha-inducible protein 6 OS=Homo sapiens GN=IFI6 PE=2 SV=2                            | IFI6_HUMAN  | 13 kDa  | 0 | 0 | 1 | 0 |
| Putative uncharacterized protein C3orf65 OS=Homo sapiens GN=C3orf65 PE=2 SV=1                     | CC065_HUMAN | 16 kDa  | 0 | 1 | 0 | 0 |
| Septin-2 OS=Homo sapiens GN=SEPT2 PE=1 SV=1                                                       | SEPT2_HUMAN | 41 kDa  | 0 | 0 | 1 | 0 |
| Olfactory receptor 2Z1 OS=Homo sapiens GN=OR2Z1 PE=2 SV=1                                         | OR2Z1_HUMAN | 34 kDa  | 0 | 1 | 0 | 0 |
| Ig kappa chain V-III region GOL OS=Homo sapiens PE=1 SV=1                                         | KV307_HUMAN | 12 kDa  | 0 | 0 | 0 | 1 |
| Probable ribosome biogenesis protein C16orf42 OS=Homo sapiens GN=C16orf42 PE=1 SV=1               | TSR3_HUMAN  | 34 kDa  | 0 | 0 | 1 | 0 |
| Poly [ADP-ribose] polymerase 2 OS=Homo sapiens GN=PARP2 PE=1 SV=2                                 | PARP2_HUMAN | 66 kDa  | 0 | 0 | 0 | 1 |
| Keratin-associated protein 9-4 OS=Homo sapiens GN=KRTAP9-4 PE=2 SV=2                              | KRA9A_HUMAN | 16 kDa  | 0 | 0 | 1 | 0 |
| Leucine-rich repeats and immunoglobulin-like domains protein 2 OS=Homo sapiens GN=LRIG2 PE=1 SV=3 | LRIG2_HUMAN | 119 kDa | 0 | 0 | 1 | 0 |
| SLIT and NTRK-like protein 2 OS=Homo sapiens GN=SLITRK2 PE=1 SV=1                                 | SLIK2_HUMAN | 95 kDa  | 0 | 1 | 0 | 0 |
| Ectonucleoside triphosphate diphosphohydrolase 2 OS=Homo sapiens GN=ENTPD2 PE=1 SV=1              | ENTP2_HUMAN | 54 kDa  | 0 | 1 | 0 | 0 |
| Putative uncharacterized protein FBXL19-AS1 OS=Homo sapiens GN=FBXL19-AS1 PE=5 SV=1               | FBA51_HUMAN | 13 kDa  | 0 | 0 | 1 | 0 |
| Sorting nexin-15 OS=Homo sapiens GN=SNX15 PE=1 SV=1                                               | SNX15_HUMAN | 38 kDa  | 0 | 1 | 0 | 0 |
| Orexin receptor type 2 OS=Homo sapiens GN=HCRT2 PE=2 SV=2                                         | OX2R_HUMAN  | 51 kDa  | 0 | 0 | 0 | 1 |

|                                                                                                                   |             |         |   |   |   |   |
|-------------------------------------------------------------------------------------------------------------------|-------------|---------|---|---|---|---|
| E3 ubiquitin-protein ligase DTX4 OS=Homo sapiens GN=DTX4 PE=1 SV=2                                                | DTX4_HUMAN  | 67 kDa  | 0 | 0 | 1 | 0 |
| Transcription factor Lbx2 OS=Homo sapiens GN=Lbx2 PE=2 SV=1                                                       | LBX2_HUMAN  | 21 kDa  | 0 | 0 | 0 | 1 |
| tRNA-specific adenosine deaminase 2 OS=Homo sapiens GN=ADAT2 PE=1 SV=1                                            | ADAT2_HUMAN | 21 kDa  | 0 | 0 | 1 | 0 |
| Keratin, type II cuticular Hb3 OS=Homo sapiens GN=KRT83 PE=1 SV=2                                                 | KRT83_HUMAN | 54 kDa  | 0 | 0 | 1 | 0 |
| Transmembrane protein 176B OS=Homo sapiens GN=TMEM176B PE=2 SV=2                                                  | T176B_HUMAN | 29 kDa  | 0 | 0 | 1 | 0 |
| Putative L-type amino acid transporter 1-like protein IMAA OS=Homo sapiens GN=SLC7A5P2 PE=5 SV=2                  | LAT1L_HUMAN | 20 kDa  | 0 | 0 | 0 | 1 |
| 26S proteasome non-ATPase regulatory subunit 7 OS=Homo sapiens GN=PSMD7 PE=1 SV=2                                 | PSD7_HUMAN  | 37 kDa  | 0 | 0 | 0 | 1 |
| Solute carrier family 22 member 24 OS=Homo sapiens GN=SLC22A24 PE=2 SV=1                                          | S22AO_HUMAN | 36 kDa  | 0 | 0 | 1 | 0 |
| Ras-related protein Rab-40B OS=Homo sapiens GN=RAB40B PE=2 SV=1                                                   | RB40B_HUMAN | 31 kDa  | 0 | 0 | 0 | 1 |
| Protein phosphatase 1 regulatory subunit 21 OS=Homo sapiens GN=PPP1R21 PE=1 SV=1                                  | PPR21_HUMAN | 88 kDa  | 0 | 0 | 0 | 1 |
| Protein preY, mitochondrial OS=Homo sapiens GN=PREY PE=1 SV=1                                                     | PREY_HUMAN  | 13 kDa  | 0 | 1 | 0 | 0 |
| Metallo-beta-lactamase domain-containing protein 1 OS=Homo sapiens GN=MBLAC1 PE=2 SV=1                            | MBLC1_HUMAN | 27 kDa  | 0 | 0 | 1 | 0 |
| Forkhead box protein L1 OS=Homo sapiens GN=FOXL1 PE=2 SV=2                                                        | FOXL1_HUMAN | 36 kDa  | 0 | 0 | 0 | 1 |
| Sulfotransferase 1A2 OS=Homo sapiens GN=SULT1A2 PE=1 SV=2                                                         | ST1A2_HUMAN | 34 kDa  | 0 | 1 | 0 | 0 |
| Protein FAM153B OS=Homo sapiens GN=FAM153B PE=2 SV=1                                                              | F153B_HUMAN | 44 kDa  | 0 | 1 | 0 | 0 |
| CD40 ligand OS=Homo sapiens GN=CD40LG PE=1 SV=1                                                                   | CD40L_HUMAN | 29 kDa  | 0 | 0 | 1 | 0 |
| E3 ubiquitin-protein ligase DTX1 OS=Homo sapiens GN=DTX1 PE=1 SV=1                                                | DTX1_HUMAN  | 67 kDa  | 0 | 0 | 1 | 0 |
| Rho guanine nucleotide exchange factor 3 OS=Homo sapiens GN=ARHGEF3 PE=2 SV=1                                     | ARHG3_HUMAN | 60 kDa  | 0 | 0 | 1 | 0 |
| Ran GTPase-activating protein 1 OS=Homo sapiens GN=RANGAP1 PE=1 SV=1                                              | RAGP1_HUMAN | 64 kDa  | 0 | 0 | 0 | 1 |
| RAS guanyl-releasing protein 4 OS=Homo sapiens GN=RASGRP4 PE=1 SV=2                                               | GRP4_HUMAN  | 75 kDa  | 0 | 0 | 0 | 1 |
| tRNA (uracil-5-)-methyltransferase homolog A OS=Homo sapiens GN=TRMT2A PE=1 SV=2                                  | TRM2A_HUMAN | 69 kDa  | 0 | 0 | 1 | 0 |
| Ovchymase-2 OS=Homo sapiens GN=OVCH2 PE=1 SV=2                                                                    | OVCH2_HUMAN | 63 kDa  | 0 | 0 | 0 | 1 |
| Extracellular matrix protein 2 OS=Homo sapiens GN=ECM2 PE=2 SV=1                                                  | ECM2_HUMAN  | 80 kDa  | 0 | 1 | 0 | 0 |
| Keratin, type I cuticular Ha6 OS=Homo sapiens GN=KRT36 PE=1 SV=1                                                  | KRT36_HUMAN | 52 kDa  | 0 | 0 | 1 | 0 |
| Urocanate hydratase OS=Homo sapiens GN=UROC1 PE=1 SV=1                                                            | HUTU_HUMAN  | 75 kDa  | 0 | 1 | 0 | 0 |
| Eukaryotic translation initiation factor 4E OS=Homo sapiens GN=EIF4E PE=1 SV=2                                    | IF4E_HUMAN  | 25 kDa  | 0 | 0 | 0 | 1 |
| ATP synthase subunit beta, mitochondrial OS=Homo sapiens GN=ATP5B PE=1 SV=3                                       | ATPB_HUMAN  | 57 kDa  | 0 | 1 | 0 | 0 |
| ADP-ribosylation factor-related protein 1 OS=Homo sapiens GN=ARFRP1 PE=1 SV=1                                     | ARFRP_HUMAN | 23 kDa  | 0 | 1 | 0 | 0 |
| T-complex protein 1 subunit beta OS=Homo sapiens GN=CCT2 PE=1 SV=4                                                | TCPB_HUMAN  | 57 kDa  | 0 | 0 | 1 | 0 |
| Alkylidihydroxyacetonephosphate synthase, peroxisomal OS=Homo sapiens GN=AGPS PE=1 SV=1                           | ADAS_HUMAN  | 73 kDa  | 0 | 0 | 1 | 0 |
| Histone deacetylase 8 OS=Homo sapiens GN=HDAC8 PE=1 SV=2                                                          | HDAC8_HUMAN | 42 kDa  | 0 | 0 | 1 | 0 |
| Nuclear receptor subfamily 1 group 1 member 3 OS=Homo sapiens GN=NR1J3 PE=1 SV=2                                  | NR1J3_HUMAN | 40 kDa  | 0 | 1 | 0 | 0 |
| Mitochondrial import inner membrane translocase subunit Tim9 B OS=Homo sapiens GN=FXC1 PE=1 SV=1                  | TIM9B_HUMAN | 12 kDa  | 0 | 0 | 0 | 1 |
| Indian hedgehog protein OS=Homo sapiens GN=IHH PE=1 SV=4                                                          | IHH_HUMAN   | 45 kDa  | 0 | 0 | 0 | 1 |
| Fas apoptotic inhibitory molecule 1 OS=Homo sapiens GN=FAIM1 PE=1 SV=1                                            | FAIM1_HUMAN | 20 kDa  | 0 | 0 | 0 | 1 |
| C2 domain-containing protein 2-like OS=Homo sapiens GN=C2CD2L PE=1 SV=3                                           | C2C2L_HUMAN | 76 kDa  | 0 | 0 | 0 | 1 |
| Uncharacterized protein C11orf20 OS=Homo sapiens GN=C11orf20 PE=2 SV=1                                            | CK020_HUMAN | 23 kDa  | 0 | 0 | 0 | 1 |
| Zinc finger protein 587B OS=Homo sapiens GN=ZNF587B PE=2 SV=1                                                     | Z587B_HUMAN | 46 kDa  | 0 | 1 | 0 | 0 |
| Protocadherin gamma-A1 OS=Homo sapiens GN=PCDHGA1 PE=2 SV=1                                                       | PCDG1_HUMAN | 101 kDa | 0 | 0 | 0 | 1 |
| Neprilysin OS=Homo sapiens GN=MME PE=1 SV=2                                                                       | NEP_HUMAN   | 86 kDa  | 0 | 1 | 0 | 0 |
| Probable G-protein coupled receptor 97 OS=Homo sapiens GN=GPR97 PE=1 SV=1                                         | GPR97_HUMAN | 61 kDa  | 0 | 0 | 1 | 0 |
| NFATC2-interacting protein OS=Homo sapiens GN=NFATC2IP PE=1 SV=1                                                  | NF2IP_HUMAN | 46 kDa  | 0 | 0 | 1 | 0 |
| Alpha-aminoacidic semialdehyde synthase, mitochondrial OS=Homo sapiens GN=AASS PE=1 SV=1                          | AASS_HUMAN  | 102 kDa | 0 | 0 | 0 | 1 |
| Trafficking protein particle complex subunit 11 OS=Homo sapiens GN=TRAPPC11 PE=1 SV=2                             | TPC11_HUMAN | 129 kDa | 0 | 0 | 1 | 0 |
| Paraspeckle component 1 OS=Homo sapiens GN=PSPC1 PE=1 SV=1                                                        | PSPC1_HUMAN | 59 kDa  | 0 | 0 | 1 | 0 |
| Retinoblastoma-binding protein 5 OS=Homo sapiens GN=RBBP5 PE=1 SV=2                                               | RBBP5_HUMAN | 59 kDa  | 0 | 0 | 0 | 1 |
| Protein FAM73B OS=Homo sapiens GN=FAM73B PE=1 SV=1                                                                | FA73B_HUMAN | 66 kDa  | 0 | 1 | 0 | 0 |
| Myozenin-1 OS=Homo sapiens GN=MYOZ1 PE=1 SV=1                                                                     | MYOZ1_HUMAN | 32 kDa  | 0 | 0 | 1 | 0 |
| Pleckstrin homology domain-containing family O member 2 OS=Homo sapiens GN=PLEKHO2 PE=1 SV=1                      | PKHO2_HUMAN | 53 kDa  | 0 | 0 | 0 | 1 |
| Calponin-1 OS=Homo sapiens GN=CNN1 PE=1 SV=2                                                                      | CNN1_HUMAN  | 33 kDa  | 0 | 0 | 1 | 0 |
| Metabotropic glutamate receptor 8 OS=Homo sapiens GN=GRM8 PE=2 SV=2                                               | GRM8_HUMAN  | 102 kDa | 0 | 0 | 1 | 0 |
| Transient receptor potential cation channel subfamily V member 5 OS=Homo sapiens GN=TRPV5 PE=1 SV=1               | TRPV5_HUMAN | 83 kDa  | 0 | 0 | 1 | 0 |
| Putative cat eye syndrome critical region protein 9 OS=Homo sapiens GN=CECR9 PE=5 SV=1                            | CECR9_HUMAN | 24 kDa  | 0 | 0 | 1 | 0 |
| Inositol-tetrakisphosphate 1-kinase OS=Homo sapiens GN=ITPK1 PE=1 SV=2                                            | ITPK1_HUMAN | 46 kDa  | 0 | 0 | 1 | 0 |
| Transcription elongation factor A N-terminal and central domain-containing protein OS=Homo sapiens GN=TEANC_HUMAN | TEANC_HUMAN | 40 kDa  | 0 | 1 | 0 | 0 |
| Cytochrome c oxidase subunit 1 OS=Homo sapiens GN=MT-CO1 PE=1 SV=1                                                | COX1_HUMAN  | 57 kDa  | 0 | 0 | 1 | 0 |
| Galectin-4 OS=Homo sapiens GN=LGALS4 PE=1 SV=1                                                                    | LEG4_HUMAN  | 36 kDa  | 0 | 0 | 1 | 0 |
| Putative nascent polypeptide-associated complex subunit alpha-like protein OS=Homo sapiens GN=NACAF NACP1_HUMAN   | NACP1_HUMAN | 23 kDa  | 0 | 1 | 0 | 0 |
| PDZ domain-containing RING finger protein 4 OS=Homo sapiens GN=PDZRN4 PE=1 SV=3                                   | PZRN4_HUMAN | 117 kDa | 0 | 0 | 0 | 1 |
| Probable G-protein coupled receptor 150 OS=Homo sapiens GN=GPR150 PE=2 SV=1                                       | GP150_HUMAN | 46 kDa  | 0 | 0 | 1 | 0 |
| Neuropeptide S OS=Homo sapiens GN=NPS PE=1 SV=1                                                                   | NPS_HUMAN   | 10 kDa  | 0 | 1 | 0 | 0 |
| Fragile X mental retardation 1 neighbor protein OS=Homo sapiens GN=FMR1NB PE=1 SV=1                               | FMR1N_HUMAN | 29 kDa  | 0 | 0 | 1 | 0 |
| Endothelial zinc finger protein induced by tumor necrosis factor alpha OS=Homo sapiens GN=ZNF71 PE=2              | ZNF71_HUMAN | 54 kDa  | 0 | 0 | 1 | 0 |
| Neuropeptide S receptor OS=Homo sapiens GN=NPSR1 PE=2 SV=1                                                        | NPSR1_HUMAN | 43 kDa  | 0 | 0 | 1 | 0 |
| Zinc finger protein 736 OS=Homo sapiens GN=ZNF736 PE=2 SV=2                                                       | ZN736_HUMAN | 50 kDa  | 0 | 0 | 1 | 0 |
| Uncharacterized protein C11orf91 OS=Homo sapiens GN=C11orf91 PE=2 SV=2                                            | CK091_HUMAN | 21 kDa  | 0 | 0 | 1 | 0 |
| Testis-specific gene 13 protein OS=Homo sapiens GN=TSGA13 PE=1 SV=1                                               | TSG13_HUMAN | 32 kDa  | 0 | 1 | 0 | 0 |
| Uncharacterized protein C1orf111 OS=Homo sapiens GN=C1orf111 PE=2 SV=3                                            | CA111_HUMAN | 29 kDa  | 0 | 0 | 0 | 1 |
| Piezo-type mechanosensitive ion channel component 1 OS=Homo sapiens GN=PIEZO1 PE=1 SV=4                           | PIEZ1_HUMAN | 287 kDa | 0 | 0 | 0 | 1 |
| Retroviral-like aspartic protease 1 OS=Homo sapiens GN=ASPRV1 PE=1 SV=1                                           | APRV1_HUMAN | 37 kDa  | 0 | 1 | 0 | 0 |
| Putative mitochondrial carrier protein LOC494141 OS=Homo sapiens PE=5 SV=2                                        | YK019_HUMAN | 17 kDa  | 0 | 0 | 1 | 0 |
| Olfactory receptor 14A2 OS=Homo sapiens GN=OR14A2 PE=2 SV=2                                                       | O14A2_HUMAN | 35 kDa  | 0 | 1 | 0 | 0 |
| Laminin subunit alpha-4 OS=Homo sapiens GN=LAMA4 PE=1 SV=4                                                        | LAMA4_HUMAN | 203 kDa | 0 | 0 | 1 | 0 |
| PI-PLC X domain-containing protein 3 OS=Homo sapiens GN=PLCX3 PE=2 SV=2                                           | PLCX3_HUMAN | 36 kDa  | 0 | 0 | 1 | 0 |
| Protein phosphatase Slingshot homolog 3 OS=Homo sapiens GN=SSH3 PE=1 SV=2                                         | SSH3_HUMAN  | 73 kDa  | 0 | 0 | 1 | 0 |
| Hyccin OS=Homo sapiens GN=FAM126A PE=1 SV=2                                                                       | HYCC1_HUMAN | 58 kDa  | 0 | 1 | 0 | 0 |
| Poly(U)-specific endoribonuclease OS=Homo sapiens GN=ENDOU PE=1 SV=2                                              | ENDOU_HUMAN | 47 kDa  | 0 | 0 | 1 | 0 |
| McKusick-Kaufman/Bardet-Biedl syndromes putative chaperonin OS=Homo sapiens GN=MKKS PE=1 SV=1                     | MKKS_HUMAN  | 62 kDa  | 0 | 0 | 1 | 0 |











|            |                                                                                                                  |              |            |         |   |   |   |        |
|------------|------------------------------------------------------------------------------------------------------------------|--------------|------------|---------|---|---|---|--------|
| c(-)-Tiva1 | Cytoplasmic dynein 1 heavy chain 1 OS=Homo sapiens GN=DYNC1H1 PE=1 SV=5                                          | DYHC1_HUMAN  | 532,405.60 | 100.00% | 4 | 4 | 4 | 1.44%  |
| c(-)-Tiva1 | PWWP domain-containing protein MUM1 OS=Homo sapiens GN=MUM1 PE=1 SV=3                                            | MUM1_HUMAN   | 78,637.40  | 0.00%   | 0 | 0 | 0 | 0.00%  |
| c(-)-Tiva1 | Azuricidin OS=Homo sapiens GN=AZU1 PE=1 SV=3                                                                     | CAP7_HUMAN   | 26,885.60  | 95.70%  | 1 | 1 | 1 | 12.40% |
| c(-)-Tiva1 | TBC1 domain family member 12 OS=Homo sapiens GN=TBC1D12 PE=1 SV=3                                                | TBC12_HUMAN  | 85,628.20  | 0.00%   | 0 | 0 | 0 | 0.00%  |
| c(-)-Tiva1 | Zinc finger protein 750 OS=Homo sapiens GN=ZNF750 PE=1 SV=1                                                      | ZN750_HUMAN  | 77,362.00  | 94.90%  | 1 | 1 | 1 | 4.84%  |
| c(-)-Tiva1 | Tetratricopeptide repeat protein 27 OS=Homo sapiens GN=TTTC27 PE=1 SV=1                                          | TTTC27_HUMAN | 96,635.30  | 99.10%  | 1 | 1 | 1 | 2.14%  |
| c(-)-Tiva1 | Sentrin-specific protease 6 OS=Homo sapiens GN=SEN6P PE=1 SV=2                                                   | SEN6P_HUMAN  | 126,149.50 | 100.00% | 2 | 2 | 2 | 4.50%  |
| c(-)-Tiva1 | Hedgehog-interacting protein OS=Homo sapiens GN=HHIP PE=1 SV=3                                                   | HHIP_HUMAN   | 78,853.40  | 99.10%  | 1 | 1 | 1 | 3.86%  |
| c(-)-Tiva1 | 60S ribosomal protein L27 OS=Homo sapiens GN=RLP27 PE=1 SV=2                                                     | RL27_HUMAN   | 15,798.40  | 93.50%  | 1 | 1 | 1 | 8.09%  |
| c(-)-Tiva1 | Condensin complex subunit 3 OS=Homo sapiens GN=NCAPG PE=1 SV=1                                                   | CND3_HUMAN   | 114,338.40 | 99.70%  | 1 | 1 | 1 | 1.87%  |
| c(-)-Tiva1 | Pappalysin-2 OS=Homo sapiens GN=PAPPA2 PE=1 SV=4                                                                 | PAPP2_HUMAN  | 198,535.20 | 0.00%   | 0 | 0 | 0 | 0.00%  |
| c(-)-Tiva1 | Uncharacterized protein Cxorf22 OS=Homo sapiens GN=Cxorf22 PE=2 SV=3                                             | CX022_HUMAN  | 110,413.40 | 0.00%   | 0 | 0 | 0 | 0.00%  |
| c(-)-Tiva1 | Zinc finger BED domain-containing protein 1 OS=Homo sapiens GN=ZBED1 PE=1 SV=1                                   | ZBED1_HUMAN  | 78,156.30  | 0.00%   | 0 | 0 | 0 | 0.00%  |
| c(-)-Tiva1 | TOX high mobility group box family member 2 OS=Homo sapiens GN=TOX2 PE=2 SV=2                                    | TOX2_HUMAN   | 51,605.70  | 99.10%  | 1 | 1 | 1 | 7.58%  |
| c(-)-Tiva1 | Laminin subunit alpha-2 OS=Homo sapiens GN=LAMA2 PE=1 SV=4                                                       | LAMA2_HUMAN  | 343,904.80 | 99.10%  | 1 | 1 | 1 | 1.02%  |
| c(-)-Tiva1 | Protein dispatched homolog 2 OS=Homo sapiens GN=DISP2 PE=2 SV=2                                                  | DISP2_HUMAN  | 152,006.50 | 62.80%  | 0 | 0 | 0 | 0.00%  |
| c(-)-Tiva1 | Keratin, type II cytoskeletal 1 OS=Homo sapiens GN=KRT1 PE=1 SV=6                                                | K2C1_HUMAN   | 66,040.30  | 100.00% | 2 | 2 | 2 | 6.68%  |
| c(-)-Tiva1 | Uncharacterized protein KIAA1683 OS=Homo sapiens GN=KIAA1683 PE=1 SV=1                                           | K1683_HUMAN  | 127,690.10 | 29.10%  | 0 | 0 | 0 | 0.00%  |
| c(-)-Tiva1 | Calcium-activated potassium channel subunit alpha-1 OS=Homo sapiens GN=KCNA1 PE=1 SV=2                           | KCMA1_HUMAN  | 137,564.00 | 99.10%  | 1 | 1 | 1 | 3.40%  |
| c(-)-Tiva1 | Importin-13 OS=Homo sapiens GN=IPO13 PE=1 SV=3                                                                   | IPO13_HUMAN  | 108,197.00 | 99.10%  | 1 | 1 | 1 | 2.49%  |
| c(-)-Tiva1 | Cholesterol 7-alpha-monooxygenase OS=Homo sapiens GN=CYP7A1 PE=1 SV=2                                            | CP7A1_HUMAN  | 57,664.10  | 0.00%   | 0 | 0 | 0 | 0.00%  |
| c(-)-Tiva1 | Low-density lipoprotein receptor-related protein 8 OS=Homo sapiens GN=LRP8 PE=1 SV=4                             | LRP8_HUMAN   | 105,634.30 | 99.20%  | 1 | 1 | 1 | 2.70%  |
| c(-)-Tiva1 | Centrosomal protein of 78 kDa OS=Homo sapiens GN=CEP78 PE=1 SV=1                                                 | CEP78_HUMAN  | 76,399.00  | 93.30%  | 1 | 1 | 1 | 1.45%  |
| c(-)-Tiva1 | Caskin-1 OS=Homo sapiens GN=CASKIN1 PE=1 SV=1                                                                    | CSK1_HUMAN   | 149,815.20 | 100.00% | 2 | 2 | 3 | 3.70%  |
| c(-)-Tiva1 | DnaI homolog subfamily A member 2 OS=Homo sapiens GN=DNAJ2 PE=1 SV=1                                             | DNJ2_HUMAN   | 45,745.70  | 0.00%   | 0 | 0 | 0 | 0.00%  |
| c(-)-Tiva1 | Sodium channel protein type 9 subunit alpha OS=Homo sapiens GN=SCN9A PE=1 SV=3                                   | SCN9A_HUMAN  | 226,382.40 | 23.10%  | 0 | 0 | 0 | 0.00%  |
| c(-)-Tiva1 | Leucine-rich repeat-containing protein 17 OS=Homo sapiens GN=LRR17 PE=2 SV=1                                     | LR17_HUMAN   | 51,801.50  | 47.80%  | 0 | 0 | 0 | 0.00%  |
| c(-)-Tiva1 | Complement factor B OS=Homo sapiens GN=CFB PE=1 SV=2                                                             | CFAB_HUMAN   | 85,533.20  | 30.90%  | 0 | 0 | 0 | 0.00%  |
| c(-)-Tiva1 | Serine/threonine-protein kinase SMG1 OS=Homo sapiens GN=SMG1 PE=1 SV=3                                           | SMG1_HUMAN   | 410,499.50 | 0.00%   | 0 | 0 | 0 | 0.00%  |
| c(-)-Tiva1 | ATP-binding cassette sub-family 8 member 6, mitochondrial OS=Homo sapiens GN=ABCB6 PE=1 SV=1                     | ABCB6_HUMAN  | 93,887.90  | 0.00%   | 0 | 0 | 0 | 0.00%  |
| c(-)-Tiva1 | UDP-GlucNAc:betaGal beta-1,3-N-acetylglucosaminyltransferase-like protein 1 OS=Homo sapiens GN=B3GNTL1 PE=2 SV=2 | B3GNT1_HUMAN | 40,712.70  | 98.90%  | 1 | 1 | 1 | 6.65%  |
| c(-)-Tiva1 | Multidrug resistance-associated protein 5 OS=Homo sapiens GN=ABCC5 PE=1 SV=2                                     | MRP5_HUMAN   | 160,665.80 | 99.10%  | 1 | 1 | 1 | 2.51%  |
| c(-)-Tiva1 | Ras-related protein Rab-15 OS=Homo sapiens GN=RAB15 PE=1 SV=1                                                    | RAB15_HUMAN  | 24,391.10  | 98.70%  | 1 | 1 | 1 | 12.70% |
| c(-)-Tiva1 | E3 ubiquitin-protein ligase E3B OS=Homo sapiens GN=UBE3D PE=1 SV=2                                               | UBE3D_HUMAN  | 43,657.50  | 0.00%   | 0 | 0 | 0 | 0.00%  |
| c(-)-Tiva1 | Fibroblast growth factor-binding protein 3 OS=Homo sapiens GN=FGFBP3 PE=1 SV=1                                   | FGFBP3_HUMAN | 27,590.70  | 0.00%   | 0 | 0 | 0 | 0.00%  |
| c(-)-Tiva1 | Inhibitor of growth protein 1 OS=Homo sapiens GN=ING1 PE=1 SV=2                                                  | ING1_HUMAN   | 46,738.20  | 99.10%  | 1 | 1 | 1 | 4.74%  |
| c(-)-Tiva1 | POC1 centriolar protein homolog A OS=Homo sapiens GN=POCIA PE=2 SV=2                                             | POC1A_HUMAN  | 45,007.60  | 0.00%   | 0 | 0 | 0 | 0.00%  |
| c(-)-Tiva1 | Malectin OS=Homo sapiens GN=MLEC PE=1 SV=1                                                                       | MLEC_HUMAN   | 32,234.10  | 93.20%  | 1 | 1 | 1 | 4.45%  |
| c(-)-Tiva1 | Collagen alpha-2(VI) chain OS=Homo sapiens GN=COL6A2 PE=1 SV=4                                                   | CO6A2_HUMAN  | 108,580.80 | 99.10%  | 1 | 1 | 1 | 1.57%  |
| c(-)-Tiva1 | Nucleoside diphosphate kinase 7 OS=Homo sapiens GN=NM7 PE=1 SV=1                                                 | NDK7_HUMAN   | 42,493.30  | 99.10%  | 1 | 1 | 1 | 5.59%  |
| c(-)-Tiva1 | Cancer-associated gene 1 protein OS=Homo sapiens GN=CAGE1 PE=2 SV=2                                              | CAGE1_HUMAN  | 90,252.10  | 0.00%   | 0 | 0 | 0 | 0.00%  |
| c(-)-Tiva1 | Integrin beta-5 OS=Homo sapiens GN=ITGB5 PE=1 SV=1                                                               | ITB5_HUMAN   | 88,054.80  | 99.10%  | 1 | 1 | 1 | 4.01%  |
| c(-)-Tiva1 | Nuclear mitotic apparatus protein 1 OS=Homo sapiens GN=NUMA1 PE=1 SV=2                                           | NUMA1_HUMAN  | 238,259.70 | 0.00%   | 0 | 0 | 0 | 0.00%  |
| c(-)-Tiva1 | Gamma-tubulin complex component 4 OS=Homo sapiens GN=TUBGCP4 PE=1 SV=1                                           | GCP4_HUMAN   | 76,090.90  | 98.20%  | 1 | 1 | 1 | 3.30%  |
| c(-)-Tiva1 | Zinc finger protein 264 OS=Homo sapiens GN=ZNF264 PE=1 SV=1                                                      | ZN264_HUMAN  | 70,585.10  | 99.10%  | 1 | 1 | 1 | 2.07%  |
| c(-)-Tiva1 | F-box only protein 38 OS=Homo sapiens GN=FBXO38 PE=1 SV=3                                                        | FBX38_HUMAN  | 133,944.40 | 0.00%   | 0 | 0 | 0 | 0.00%  |
| c(-)-Tiva1 | Oviduct-specific glycoprotein OS=Homo sapiens GN=OVGP1 PE=2 SV=1                                                 | OVGP1_HUMAN  | 75,422.60  | 0.00%   | 0 | 0 | 0 | 0.00%  |
| c(-)-Tiva1 | Transmembrane prostate androgen-induced protein OS=Homo sapiens GN=PMP2A1 PE=1 SV=1                              | PMP2A_HUMAN  | 31,608.80  | 98.40%  | 1 | 1 | 1 | 9.41%  |
| c(-)-Tiva1 | Protocadherin Fat 3 OS=Homo sapiens GN=FBXO38 PE=1 SV=3                                                          | FAT3_HUMAN   | 505,517.50 | 90.50%  | 1 | 1 | 1 | 0.50%  |
| c(-)-Tiva1 | Tropomyosin alpha-1 chain OS=Homo sapiens GN=TPM1 PE=1 SV=2                                                      | TPM1_HUMAN   | 32,710.00  | 100.00% | 7 | 8 | 8 | 28.20% |
| c(-)-Tiva1 | Cytoskeleton-associated protein 4 OS=Homo sapiens GN=CKAP4 PE=1 SV=2                                             | CKAP4_HUMAN  | 66,022.20  | 99.10%  | 1 | 1 | 1 | 1.99%  |
| c(-)-Tiva1 | Vam6/Vps39-like protein OS=Homo sapiens GN=VPS39 PE=1 SV=2                                                       | VPS39_HUMAN  | 101,812.20 | 99.10%  | 1 | 1 | 1 | 2.37%  |
| c(-)-Tiva1 | Aldehyde oxidase OS=Homo sapiens GN=AOX1 PE=2 SV=2                                                               | ADO_HUMAN    | 147,920.80 | 0.00%   | 0 | 0 | 0 | 0.00%  |
| c(-)-Tiva1 | Moesin OS=Homo sapiens GN=MSN PE=1 SV=3                                                                          | MOES_HUMAN   | 67,821.80  | 0.00%   | 0 | 0 | 0 | 0.00%  |
| c(-)-Tiva1 | Protein kinase C epsilon type OS=Homo sapiens GN=PRKCE PE=1 SV=1                                                 | KPCE_HUMAN   | 83,674.80  | 0.00%   | 0 | 0 | 0 | 0.00%  |
| c(-)-Tiva1 | Probable proline dehydrogenase 2 OS=Homo sapiens GN=PRODH2 PE=2 SV=1                                             | PROD2_HUMAN  | 58,870.70  | 24.10%  | 0 | 0 | 0 | 0.00%  |
| c(-)-Tiva1 | Molybdenum cofactor sulfurase OS=Homo sapiens GN=MOCS PE=1 SV=2                                                  | MOCS_HUMAN   | 98,120.70  | 99.10%  | 1 | 1 | 1 | 1.13%  |
| c(-)-Tiva1 | Ribonuclease inhibitor OS=Homo sapiens GN=RNH1 PE=1 SV=2                                                         | RNI_HUMAN    | 49,974.40  | 99.10%  | 1 | 1 | 1 | 4.56%  |
| c(-)-Tiva1 | Coiled-coil domain-containing protein 62 OS=Homo sapiens GN=CCDC62 PE=1 SV=2                                     | CCDC62_HUMAN | 77,749.50  | 100.00% | 1 | 1 | 1 | 2.63%  |
| c(-)-Tiva1 | UDP-glucose:glycoprotein glucosyltransferase 2 OS=Homo sapiens GN=UGGT2 PE=1 SV=4                                | UGGT2_HUMAN  | 174,743.70 | 53.00%  | 0 | 0 | 0 | 0.00%  |
| c(-)-Tiva1 | Neurofibromin OS=Homo sapiens GN=NF1 PE=1 SV=2                                                                   | NF1_HUMAN    | 319,377.50 | 0.00%   | 0 | 0 | 0 | 0.00%  |
| c(-)-Tiva1 | Serine/arginine-rich splicing factor 4 OS=Homo sapiens GN=SRSF4 PE=1 SV=2                                        | SRSF4_HUMAN  | 56,680.00  | 0.00%   | 0 | 0 | 0 | 0.00%  |
| c(-)-Tiva1 | Aryl hydrocarbon receptor OS=Homo sapiens GN=AGR PE=1 SV=2                                                       | AHR_HUMAN    | 96,149.20  | 97.00%  | 1 | 1 | 1 | 2.83%  |
| c(-)-Tiva1 | MAM and LDL-receptor class A domain-containing protein C10orf112 OS=Homo sapiens GN=C10orf112 PE=2 SV=3          | CJ112_HUMAN  | 163,995.70 | 0.00%   | 0 | 0 | 0 | 0.00%  |
| c(-)-Tiva1 | Elongation factor 1-alpha 1 OS=Homo sapiens GN=EEF1A1 PE=1 SV=1                                                  | EF1A1_HUMAN  | 50,141.20  | 100.00% | 4 | 4 | 5 | 17.50% |
| c(-)-Tiva1 | Uncharacterized protein C12orf68 OS=Homo sapiens GN=C12orf68 PE=2 SV=2                                           | CLO68_HUMAN  | 20,483.80  | 85.20%  | 1 | 1 | 1 | 7.22%  |
| c(-)-Tiva1 | Cadherin-5 OS=Homo sapiens GN=CDH5 PE=1 SV=5                                                                     | CADH5_HUMAN  | 87,529.50  | 59.50%  | 0 | 0 | 0 | 0.00%  |
| c(-)-Tiva1 | Cdc42-interacting protein 4 OS=Homo sapiens GN=TRIP10 PE=1 SV=3                                                  | CIP4_HUMAN   | 68,353.10  | 59.80%  | 0 | 0 | 0 | 0.00%  |
| c(-)-Tiva1 | Testis-expressed sequence 30 protein OS=Homo sapiens GN=TEX30 PE=2 SV=1                                          | TEX30_HUMAN  | 25,585.50  | 93.40%  | 1 | 1 | 1 | 11.00% |
| c(-)-Tiva1 | Ral GTPase-activating protein subunit alpha-2 OS=Homo sapiens GN=RALGAP2 PE=1 SV=2                               | RGPA2_HUMAN  | 210,773.50 | 0.00%   | 0 | 0 | 0 | 0.00%  |
| c(-)-Tiva1 | Coatomer subunit beta' OS=Homo sapiens GN=COPB2 PE=1 SV=2                                                        | COPB2_HUMAN  | 102,489.10 | 99.10%  | 1 | 1 | 1 | 1.88%  |
| c(-)-Tiva1 | Histone H1.1 OS=Homo sapiens GN=HIST1H1A PE=1 SV=3                                                               | H11_HUMAN    | 21,843.20  | 100.00% | 2 | 2 | 2 | 7.44%  |
| c(-)-Tiva1 | Fragile X mental retardation 1 neighbor protein OS=Homo sapiens GN=FMR1N8 PE=1 SV=1                              | FMR1N_HUMAN  | 29,241.30  | 0.00%   | 0 | 0 | 0 | 0.00%  |
| c(-)-Tiva1 | Copper-transporting ATPase 2 OS=Homo sapiens GN=ATP7B PE=1 SV=4                                                  | ATP7B_HUMAN  | 157,262.40 | 87.80%  | 1 | 1 | 1 | 1.30%  |
| c(-)-Tiva1 | Prelamin-A/C OS=Homo sapiens GN=LMNA PE=1 SV=1                                                                   | LMNA_HUMAN   | 74,140.70  | 100.00% | 2 | 2 | 2 | 5.87%  |
| c(-)-Tiva1 | Peroxiredoxin-4 OS=Homo sapiens GN=PRDX4 PE=1 SV=1                                                               | PRDX4_HUMAN  | 30,541.10  | 96.20%  | 1 | 1 | 1 | 5.17%  |
| c(-)-Tiva1 | Codanin-1 OS=Homo sapiens GN=CDAN1 PE=1 SV=4                                                                     | CDAN1_HUMAN  | 134,122.20 | 87.00%  | 1 | 1 | 1 | 3.10%  |
| c(-)-Tiva1 | Two pore calcium channel protein 2 OS=Homo sapiens GN=TPCN2 PE=1 SV=2                                            | TPC2_HUMAN   | 85,246.00  | 66.30%  | 0 | 0 | 0 | 0.00%  |
| c(-)-Tiva1 | E3 ubiquitin-protein ligase HUWE1 OS=Homo sapiens GN=HUWE1 PE=1 SV=3                                             | HUWE1_HUMAN  | 481,892.10 | 99.90%  | 1 | 1 | 1 | 0.57%  |
| c(-)-Tiva1 | A disintegrin and metalloproteinase with thrombospondin motifs 19 OS=Homo sapiens GN=ADAMTS19 PE=1 SV=2          | ATS19_HUMAN  | 134,047.80 | 23.80%  | 0 | 0 | 0 | 0.00%  |
| c(-)-Tiva1 | Agrin OS=Homo sapiens GN=AGRN PE=1 SV=4                                                                          | AGRN_HUMAN   | 214,838.00 | 96.30%  | 1 | 1 | 1 | 2.05%  |
| c(-)-Tiva1 | Nucleophosmin OS=Homo sapiens GN=NPM1 PE=1 SV=2                                                                  | NPM_HUMAN    | 32,575.50  | 100.00% | 4 | 4 | 4 | 15.60% |
| c(-)-Tiva1 | Uncharacterized protein C10orf105 OS=Homo sapiens GN=C10orf105 PE=2 SV=3                                         | CJ105_HUMAN  | 14,519.70  | 90.70%  | 1 | 1 | 1 | 15.00% |
| c(-)-Tiva1 | Translocation protein SEC63 homolog OS=Homo sapiens GN=SEC63 PE=1 SV=2                                           | SEC63_HUMAN  | 87,999.40  | 88.60%  | 0 | 0 | 0 | 0.00%  |
| c(-)-Tiva1 | Zinc finger protein 574 OS=Homo sapiens GN=ZNF574 PE=1 SV=2                                                      | ZN574_HUMAN  | 98,897.50  | 100.00% | 1 | 1 | 1 | 2.23%  |
| c(-)-Tiva1 | Zinc finger protein 28 homolog OS=Homo sapiens GN=ZFP28 PE=1 SV=1                                                | ZFP28_HUMAN  | 98,705.00  | 65.40%  | 0 | 0 | 0 | 0.00%  |
| c(-)-Tiva1 | Lysosomal-trafficking regulator OS=Homo sapiens GN=LYST PE=1 SV=3                                                | LYST_HUMAN   | 429,140.90 | 53.50%  | 0 | 0 | 0 | 0.00%  |
| c(-)-Tiva1 | Granzyme M OS=Homo sapiens GN=GZMM PE=1 SV=2                                                                     | GRAM_HUMAN   | 27,545.30  | 99.10%  | 1 | 1 | 1 | 13.20% |
| c(-)-Tiva1 | Peptidyl-glycine alpha-amidating monooxygenase OS=Homo sapiens GN=PAM PE=1 SV=2                                  | AMD_HUMAN    | 108,332.50 | 98.70%  | 1 | 1 | 1 | 2.16%  |
| c(-)-Tiva1 | Rho guanine nucleotide exchange factor 10 OS=Homo sapiens GN=ARHGEF10 PE=1 SV=4                                  | ARHGA_HUMAN  | 151,612.50 | 98.40%  | 1 | 1 | 1 | 1.13%  |
| c(-)-Tiva1 | Kinesin-like protein KIFC3 OS=Homo sapiens GN=KIFC3 PE=1 SV=4                                                    | KIFC3_HUMAN  | 92,775.20  | 100.00% | 1 | 1 | 1 | 2.64%  |
| c(-)-Tiva1 | Tubulin beta-6 chain OS=Homo sapiens GN=TUBB6 PE=1 SV=1                                                          | TBB6_HUMAN   | 49,857.20  | 0.00%   | 0 | 0 | 0 | 0.00%  |
| c(-)-Tiva1 | Trace amine-associated receptor 1 OS=Homo sapiens GN=TAAR1 PE=1 SV=1                                             | TAAR1_HUMAN  | 39,093.40  | 0.00%   | 0 | 0 | 0 | 0.00%  |
| c(-)-Tiva1 | Splicing factor, proline- and glutamine-rich OS=Homo sapiens GN=SFQ PE=1 SV=2                                    | SFPQ_HUMAN   | 76,149.50  | 99.10%  | 1 | 1 | 1 | 1.98%  |
| c(-)-Tiva1 | TBC1 domain family member 14 OS=Homo sapiens GN=TBC1D14 PE=1 SV=3                                                | TBC14_HUMAN  | 78,140.00  | 55.40%  | 0 | 0 | 0 | 0.00%  |
| c(-)-Tiva1 | Dynamin-3 OS=Homo sapiens GN=DNM3 PE=1 SV=4                                                                      | DYN3_HUMAN   | 97,749.60  | 87.60%  | 1 | 1 | 1 | 2.07%  |
| c(-)-Tiva1 | Keratin-associated protein 4-5 OS=Homo sapiens GN=KRTAP4-5 PE=2 SV=4                                             | KRA45_HUMAN  | 19,359.80  | 0.00%   | 0 | 0 | 0 | 0.00%  |
| c(-)-Tiva1 | Transmembrane protein 232 OS=Homo sapiens GN=TMEM232 PE=2 SV=2                                                   | TM232_HUMAN  | 76,456.10  | 99.10%  | 1 | 1 | 1 | 4.72%  |
| c(-)-Tiva1 | tRNA-splicing endonuclease subunit Sen54 OS=Homo sapiens GN=TSEN54 PE=1 SV=3                                     | SEN54_HUMAN  | 58,819.60  | 99.10%  | 1 | 1 | 1 | 5.32%  |
| c(-)-Tiva1 | Coiled-coil domain-containing protein 70 OS=Homo sapiens GN=CCDC70 PE=2 SV=1                                     | CCD70_HUMAN  | 28,767.80  | 99.10%  | 1 | 1 | 1 | 11.20% |
| c(-)-Tiva1 | Myeloid-associated differentiation marker OS=Homo sapiens GN=MYADM PE=1 SV=2                                     | MYADM_HUMAN  | 35,274.20  | 99.10%  | 1 | 1 | 1 | 3.11%  |
| c(-)-Tiva1 | CAP-Gly domain-containing linker protein 2 OS=Homo sapiens GN=CLIP2 PE=1 SV=1                                    | CLIP2_HUMAN  | 115,839.00 | 0.00%   | 0 | 0 | 0 | 0.00%  |
| c(-)-Tiva1 | DEP domain-containing protein 4 OS=Homo sapiens GN=DEPDC4 PE=2 SV=1                                              | DEPD4_HUMAN  | 33,694.60  | 87.10%  | 1 | 1 | 1 | 4.42%  |
| c(-)-Tiva1 | Inactive polyglycylase TTL10 OS=Homo sapiens GN=TTL10 PE=1 SV=2                                                  | TTL10_HUMAN  | 75,043.60  | 0.00%   | 0 | 0 | 0 | 0.00%  |
| c(-)-Tiva1 | Protein turtle homolog B OS=Homo sapiens GN=IGSF9B PE=2 SV=2                                                     | TUTL8_HUMAN  | 147,090.60 | 0.00%   | 0 | 0 | 0 | 0.00%  |
| c(-)-Tiva1 | 6-phosphofructokinase type C OS=Homo sapiens GN=PFKP PE=1 SV=2                                                   | K6PP_HUMAN   | 85,597.40  | 36.70%  | 0 | 0 | 0 | 0.00%  |
| c(-)-Tiva1 | Tubulin polyglutamylase TTL6 OS=Homo sapiens GN=TTL6 PE=1 SV=2                                                   | TTL6_HUMAN   | 96,403.80  | 0.00%   | 0 | 0 | 0 | 0.00%  |
| c(-)-Tiva1 | Myosin light chain 4 OS=Homo sapiens GN=MYL4 PE=1 SV=3                                                           | MYL4_HUMAN   | 21,565.00  | 0.00%   | 0 | 0 | 0 | 0.00%  |
| c(-)-Tiva1 | Putative uncharacterized protein ENSPO0000380701 OS=Homo sapiens PE=4 SV=1                                       | YQ045_HUMAN  | 8,431.60   | 99.10%  | 1 | 1 | 1 | 47.20% |
| c(-)-Tiva1 | Aldehyde dehydrogenase, dimeric NADP-prefering OS=Homo sapiens GN=ALDH3A1 PE=1 SV=3                              | AL3A1_HUMAN  | 50,395.70  | 0.00%   | 0 | 0 | 0 | 0.00%  |
| c(-)-Tiva1 | N-acetylaspartyl-glutamate synthetase A OS=Homo sapiens GN=RIMKLA PE=2 SV=2                                      | RIMKA_HUMAN  | 42,864.10  | 99.10%  | 1 | 1 | 1 | 10.50% |
| c(-)-Tiva1 | HEAT repeat-containing protein 4 OS=Homo sapiens GN=HEATR4 PE=1 SV=2                                             | HEAT4_HUMAN  | 117,179.40 | 0.00%   | 0 | 0 | 0 | 0.00%  |
| c(-)-Tiva1 | Protein PRR2C OS=Homo sapiens GN=PRR2C PE=1 SV=4                                                                 | PRC2C_HUMAN  | 316,908.50 | 100.00% | 1 | 1 | 1 | 0.76%  |

|            |                                                                                                 |                              |            |           |              |            |         |   |   |       |        |
|------------|-------------------------------------------------------------------------------------------------|------------------------------|------------|-----------|--------------|------------|---------|---|---|-------|--------|
| c(-)-Tiva1 | Complement component C7                                                                         | OS=Homo sapiens GN=C7        | PE=1       | SV=2      | CO7_HUMAN    | 93,516.60  | 0.00%   | 0 | 0 | 0     | 0.00%  |
| c(-)-Tiva1 | Cytochrome b5 reductase 4                                                                       | OS=Homo sapiens GN=CYB5R4    | PE=1       | SV=1      | NBSR4_HUMAN  | 59,475.90  | 93.80%  | 1 | 1 | 1     | 3.65%  |
| c(-)-Tiva1 | Breast cancer type 2 susceptibility protein                                                     | OS=Homo sapiens GN=BRCA2     | PE=1       | SV=2      | BRCA2_HUMAN  | 384,226.80 | 0.00%   | 0 | 0 | 0     | 0.00%  |
| c(-)-Tiva1 | Uveal autoantigen with coiled-coil domains and ankyrin repeats                                  | OS=Homo sapiens GN=UACA      | PE=1       | SV=2      | UACA_HUMAN   | 162,509.60 | 43.60%  | 0 | 0 | 0     | 0.00%  |
| c(-)-Tiva1 | Male-specific lethal 3 homolog                                                                  | OS=Homo sapiens GN=MSL3      | PE=1       | SV=1      | MSL3L_HUMAN  | 59,825.50  | 0.00%   | 0 | 0 | 0     | 0.00%  |
| c(-)-Tiva1 | 40S ribosomal protein S5                                                                        | OS=Homo sapiens GN=RP55      | PE=1       | SV=4      | RS5_HUMAN    | 22,877.00  | 100.00% | 2 | 2 | 2     | 17.20% |
| c(-)-Tiva1 | Talin-2                                                                                         | OS=Homo sapiens GN=TLN2      | PE=1       | SV=4      | TLN2_HUMAN   | 271,611.00 | 99.90%  | 1 | 1 | 1     | 1.42%  |
| c(-)-Tiva1 | 78 kDa glucose-regulated protein                                                                | OS=Homo sapiens GN=HSPA5     | PE=1       | SV=2      | GRP78_HUMAN  | 72,334.70  | 100.00% | 2 | 2 | 2     | 4.28%  |
| c(-)-Tiva1 | Lysine-tRNA ligase                                                                              | OS=Homo sapiens GN=KARS      | PE=1       | SV=3      | SYK_HUMAN    | 68,050.40  | 100.00% | 2 | 2 | 2     | 4.86%  |
| c(-)-Tiva1 | Zinc finger protein 429                                                                         | OS=Homo sapiens GN=ZNF429    | PE=1       | SV=2      | ZN429_HUMAN  | 78,153.40  | 100.00% | 1 | 1 | 1     | 3.71%  |
| c(-)-Tiva1 | BAH and coiled-coil domain-containing protein 1                                                 | OS=Homo sapiens GN=BAHCC1    | PE=1       | SV=3      | BAHC1_HUMAN  | 276,933.70 | 0.00%   | 0 | 0 | 0     | 0.00%  |
| c(-)-Tiva1 | Nuclear pore complex protein Nup107                                                             | OS=Homo sapiens GN=NUP107    | PE=1       | SV=1      | NU107_HUMAN  | 106,376.70 | 0.00%   | 0 | 0 | 0     | 0.00%  |
| c(-)-Tiva1 | Isoleucine-tRNA ligase, cytoplasmic                                                             | OS=Homo sapiens GN=IARS      | PE=1       | SV=2      | SYIC_HUMAN   | 144,501.80 | 100.00% | 1 | 1 | 1     | 1.43%  |
| c(-)-Tiva1 | Tyrosine-protein kinase JAK3                                                                    | OS=Homo sapiens GN=JAK3      | PE=1       | SV=2      | JAK3_HUMAN   | 125,101.70 | 53.50%  | 0 | 0 | 0     | 0.00%  |
| c(-)-Tiva1 | Collagen alpha-1(I) chain                                                                       | OS=Homo sapiens GN=COL2A1    | PE=1       | SV=3      | CO2A1_HUMAN  | 141,786.20 | 0.00%   | 0 | 0 | 0     | 0.00%  |
| c(-)-Tiva1 | Dual specificity mitogen-activated protein kinase kinase 5                                      | OS=Homo sapiens GN=MAP2K5    | PE=1       | SV=2      | MP2K5_HUMAN  | 50,112.20  | 89.60%  | 1 | 1 | 1     | 7.59%  |
| c(-)-Tiva1 | Phosphatidylinositol 3,4,5-trisphosphate 3-phosphatase and dual-specificity protein phosphatase | PTEN OS=Homo sapiens GN=     | PTEN_HUMAN | 47,167.50 | 0.00%        | 0          | 0       | 0 | 0 | 0.00% |        |
| c(-)-Tiva1 | Rho guanine nucleotide exchange factor 4                                                        | OS=Homo sapiens GN=ARHG4     | PE=1       | SV=3      | ARHG4_HUMAN  | 79,067.40  | 99.10%  | 1 | 1 | 1     | 2.90%  |
| c(-)-Tiva1 | Rab11 family-interacting protein 2                                                              | OS=Homo sapiens GN=RAB11FIP2 | PE=1       | SV=1      | RFIP2_HUMAN  | 58,281.70  | 0.00%   | 0 | 0 | 0     | 0.00%  |
| c(-)-Tiva1 | Polyadenylate-binding protein 5                                                                 | OS=Homo sapiens GN=PABPC5    | PE=1       | SV=1      | PABP5_HUMAN  | 43,332.20  | 96.10%  | 1 | 1 | 1     | 6.28%  |
| c(-)-Tiva1 | 60S ribosomal protein L10-like                                                                  | OS=Homo sapiens GN=RPL10L    | PE=1       | SV=3      | RL10L_HUMAN  | 24,519.20  | 99.10%  | 1 | 1 | 1     | 5.14%  |
| c(-)-Tiva1 | WD repeat-containing protein 25                                                                 | OS=Homo sapiens GN=WDRT25    | PE=1       | SV=3      | WDR25_HUMAN  | 60,161.30  | 0.00%   | 0 | 0 | 0     | 0.00%  |
| c(-)-Tiva1 | Nucleoprotein TPR                                                                               | OS=Homo sapiens GN=TPR       | PE=1       | SV=3      | TPR_HUMAN    | 267,289.30 | 100.00% | 2 | 2 | 2     | 1.40%  |
| c(-)-Tiva1 | UAP56-interacting factor                                                                        | OS=Homo sapiens GN=FYT1D1    | PE=1       | SV=3      | UIF_HUMAN    | 35,819.30  | 0.00%   | 0 | 0 | 0     | 0.00%  |
| c(-)-Tiva1 | Proteasome subunit alpha type-7                                                                 | OS=Homo sapiens GN=PSMA7     | PE=1       | SV=1      | PSA7_HUMAN   | 27,887.20  | 79.50%  | 0 | 0 | 0     | 0.00%  |
| c(-)-Tiva1 | Methionine-R-sulfoxide reductase B3                                                             | OS=Homo sapiens GN=MSRB3     | PE=1       | SV=2      | MSRB3_HUMAN  | 20,702.40  | 92.90%  | 1 | 1 | 1     | 15.10% |
| c(-)-Tiva1 | Zinc finger protein 362                                                                         | OS=Homo sapiens GN=ZNF362    | PE=1       | SV=1      | ZN362_HUMAN  | 45,814.60  | 92.30%  | 1 | 1 | 1     | 8.10%  |
| c(-)-Tiva1 | Keratin-associated protein 5-3                                                                  | OS=Homo sapiens GN=KRTP5-3   | PE=2       | SV=1      | KRA53_HUMAN  | 22,102.30  | 100.00% | 1 | 1 | 1     | 12.60% |
| c(-)-Tiva1 | Receptor-type tyrosine-protein phosphatase beta                                                 | OS=Homo sapiens GN=PTPRB     | PE=1       | SV=3      | PTPRB_HUMAN  | 224,301.30 | 0.00%   | 0 | 0 | 0     | 0.00%  |
| c(-)-Tiva1 | Probable carboxypeptidase X1                                                                    | OS=Homo sapiens GN=CPXM1     | PE=2       | SV=2      | CPXM1_HUMAN  | 81,668.30  | 98.40%  | 1 | 1 | 1     | 5.18%  |
| c(-)-Tiva1 | Centrosomal protein of 290 kDa                                                                  | OS=Homo sapiens GN=CEP290    | PE=1       | SV=2      | CE290_HUMAN  | 290,395.20 | 89.70%  | 1 | 1 | 1     | 0.85%  |
| c(-)-Tiva1 | Xin actin-binding repeat-containing protein 2                                                   | OS=Homo sapiens GN=XIRP2     | PE=1       | SV=2      | XIRP2_HUMAN  | 382,297.50 | 96.50%  | 0 | 0 | 0     | 0.00%  |
| c(-)-Tiva1 | VPS10 domain-containing receptor SorC1                                                          | OS=Homo sapiens GN=SORC1     | PE=2       | SV=3      | SORC1_HUMAN  | 129,636.70 | 0.00%   | 0 | 0 | 0     | 0.00%  |
| c(-)-Tiva1 | Histone-lysine N-methyltransferase MLL                                                          | OS=Homo sapiens GN=MLL       | PE=1       | SV=5      | MLL1_HUMAN   | 431,764.40 | 0.00%   | 0 | 0 | 0     | 0.00%  |
| c(-)-Tiva1 | Transmembrane emp24 domain-containing protein 2                                                 | OS=Homo sapiens GN=TMED2     | PE=1       | SV=1      | TMED2_HUMAN  | 22,761.40  | 98.90%  | 1 | 1 | 1     | 13.90% |
| c(-)-Tiva1 | Retinoic acid-induced protein 3                                                                 | OS=Homo sapiens GN=GRPCSA    | PE=1       | SV=2      | RAI3_HUMAN   | 40,252.60  | 24.60%  | 0 | 0 | 0     | 0.00%  |
| c(-)-Tiva1 | Chromodomain-helicase-DNA-binding protein 1-like                                                | OS=Homo sapiens GN=CHD1L     | PE=1       | SV=2      | CHD1L_HUMAN  | 100,987.70 | 90.10%  | 1 | 1 | 1     | 1.78%  |
| c(-)-Tiva1 | C-terminal-binding protein 2                                                                    | OS=Homo sapiens GN=CTBP2     | PE=1       | SV=1      | CTBP2_HUMAN  | 48,945.10  | 97.70%  | 1 | 1 | 1     | 6.07%  |
| c(-)-Tiva1 | Treacle protein                                                                                 | OS=Homo sapiens GN=TCOF1     | PE=1       | SV=3      | TCOF_HUMAN   | 152,104.50 | 99.10%  | 1 | 1 | 1     | 1.48%  |
| c(-)-Tiva1 | Fibrillin-1                                                                                     | OS=Homo sapiens GN=FBN1      | PE=1       | SV=3      | FBN1_HUMAN   | 312,226.00 | 99.90%  | 2 | 2 | 2     | 1.71%  |
| c(-)-Tiva1 | Probable E3 ubiquitin-protein ligase makorin-3                                                  | OS=Homo sapiens GN=MKRN3     | PE=1       | SV=1      | MKRN3_HUMAN  | 55,644.50  | 0.00%   | 0 | 0 | 0     | 0.00%  |
| c(-)-Tiva1 | Putative HIN1-like protein                                                                      | OS=Homo sapiens GN=HIN1L     | PE=5       | SV=1      | HIN1L_HUMAN  | 49,737.10  | 0.00%   | 0 | 0 | 0     | 0.00%  |
| c(-)-Tiva1 | Arginine decarboxylase                                                                          | OS=Homo sapiens GN=ADC       | PE=2       | SV=1      | ADC_HUMAN    | 49,979.50  | 0.00%   | 0 | 0 | 0     | 0.00%  |
| c(-)-Tiva1 | 40S ribosomal protein S6                                                                        | OS=Homo sapiens GN=RP56      | PE=1       | SV=1      | RS6_HUMAN    | 28,681.70  | 99.10%  | 1 | 1 | 1     | 5.22%  |
| c(-)-Tiva1 | Collagen alpha-1(I) chain                                                                       | OS=Homo sapiens GN=COL9A1    | PE=1       | SV=3      | CO9A1_HUMAN  | 91,870.90  | 22.70%  | 0 | 0 | 0     | 0.00%  |
| c(-)-Tiva1 | Zinc finger and BTB domain-containing protein 43                                                | OS=Homo sapiens GN=ZBTB43    | PE=1       | SV=1      | ZBT43_HUMAN  | 52,629.50  | 0.00%   | 0 | 0 | 0     | 0.00%  |
| c(-)-Tiva1 | Interleukin-17F                                                                                 | OS=Homo sapiens GN=IL17F     | PE=1       | SV=3      | IL17F_HUMAN  | 18,044.40  | 94.40%  | 1 | 1 | 1     | 7.98%  |
| c(-)-Tiva1 | Nephrocystin-4                                                                                  | OS=Homo sapiens GN=NPHP4     | PE=1       | SV=2      | NPHP4_HUMAN  | 157,596.20 | 0.00%   | 0 | 0 | 0     | 0.00%  |
| c(-)-Tiva1 | Brain-specific angiogenesis inhibitor 1                                                         | OS=Homo sapiens GN=BAI1      | PE=1       | SV=1      | BAI1_HUMAN   | 173,533.70 | 98.00%  | 1 | 1 | 1     | 1.58%  |
| c(-)-Tiva1 | Serine/arginine repetitive matrix protein 4                                                     | OS=Homo sapiens GN=SRRM4     | PE=1       | SV=2      | SRRM4_HUMAN  | 68,560.50  | 91.40%  | 1 | 1 | 1     | 1.31%  |
| c(-)-Tiva1 | Uncharacterized protein C10orf82                                                                | OS=Homo sapiens GN=C10orf82  | PE=2       | SV=2      | CJ082_HUMAN  | 25,923.60  | 99.10%  | 1 | 1 | 1     | 9.57%  |
| c(-)-Tiva1 | Proenkephalin-A                                                                                 | OS=Homo sapiens GN=PENK      | PE=1       | SV=1      | PENK_HUMAN   | 30,788.30  | 90.00%  | 1 | 1 | 1     | 12.40% |
| c(-)-Tiva1 | Elongation factor Tu, mitochondrial                                                             | OS=Homo sapiens GN=TUFM      | PE=1       | SV=2      | EFTU_HUMAN   | 49,542.40  | 99.10%  | 1 | 1 | 1     | 3.76%  |
| c(-)-Tiva1 | Golgin subfamily A member 6-like protein 1                                                      | OS=Homo sapiens GN=GOLGA6L1  | PE=2       | SV=2      | GG6L1_HUMAN  | 77,075.60  | 0.00%   | 0 | 0 | 0     | 0.00%  |
| c(-)-Tiva1 | Eukaryotic translation initiation factor 3 subunit A                                            | OS=Homo sapiens GN=EIF3A     | PE=1       | SV=1      | EIF3A_HUMAN  | 166,574.90 | 0.00%   | 0 | 0 | 0     | 0.00%  |
| c(-)-Tiva1 | Exportin-2                                                                                      | OS=Homo sapiens GN=CSE1L     | PE=1       | SV=3      | XPO2_HUMAN   | 110,421.90 | 100.00% | 1 | 1 | 1     | 1.54%  |
| c(-)-Tiva1 | Actin filament-associated protein 1-like 1                                                      | OS=Homo sapiens GN=AFAP1L1   | PE=1       | SV=2      | AF1L1_HUMAN  | 86,432.90  | 0.00%   | 0 | 0 | 0     | 0.00%  |
| c(-)-Tiva1 | G-protein coupled receptor 12                                                                   | OS=Homo sapiens GN=GPR12     | PE=1       | SV=1      | GPR12_HUMAN  | 36,731.60  | 0.00%   | 0 | 0 | 0     | 0.00%  |
| c(-)-Tiva1 | DNA polymerase alpha catalytic subunit                                                          | OS=Homo sapiens GN=POLA1     | PE=1       | SV=2      | DPOLA_HUMAN  | 165,917.30 | 93.70%  | 1 | 1 | 1     | 1.09%  |
| c(-)-Tiva1 | Serine hydroxymethyltransferase, mitochondrial                                                  | OS=Homo sapiens GN=SHMT2     | PE=1       | SV=3      | GLYM_HUMAN   | 55,994.70  | 0.00%   | 0 | 0 | 0     | 0.00%  |
| c(-)-Tiva1 | Transient receptor potential cation channel subfamily V member 4                                | OS=Homo sapiens GN=TRPV4     | PE=1       | SV=2      | TRPV4_HUMAN  | 98,285.50  | 99.10%  | 0 | 0 | 0     | 1.38%  |
| c(-)-Tiva1 | Glucagon-like peptide 1 receptor                                                                | OS=Homo sapiens GN=GLP1R     | PE=1       | SV=2      | GLP1R_HUMAN  | 53,027.20  | 99.10%  | 1 | 1 | 1     | 5.62%  |
| c(-)-Tiva1 | PDZ domain-containing protein 2                                                                 | OS=Homo sapiens GN=PDZD2     | PE=1       | SV=4      | PDZD2_HUMAN  | 301,640.80 | 88.00%  | 1 | 1 | 1     | 0.78%  |
| c(-)-Tiva1 | Paraneoplastic antigen Ma3                                                                      | OS=Homo sapiens GN=PNMA3     | PE=2       | SV=2      | PNMA3_HUMAN  | 52,404.60  | 99.10%  | 1 | 1 | 1     | 3.02%  |
| c(-)-Tiva1 | Aranycorbin                                                                                     | OS=Homo sapiens GN=RAI14     | PE=1       | SV=2      | RAI14_HUMAN  | 110,043.30 | 0.00%   | 0 | 0 | 0     | 0.00%  |
| c(-)-Tiva1 | Guanine nucleotide-binding protein G(I)/G(S)/G(T) subunit beta-2                                | OS=Homo sapiens GN=GNB2      | PE=1       | SV=3      | GBB2_HUMAN   | 37,331.80  | 73.60%  | 0 | 0 | 0     | 0.00%  |
| c(-)-Tiva1 | Failed axon connections homolog                                                                 | OS=Homo sapiens GN=FAXC      | PE=2       | SV=2      | FAXC_HUMAN   | 46,844.80  | 99.70%  | 1 | 1 | 1     | 6.85%  |
| c(-)-Tiva1 | Coiled-coil domain-containing protein 150                                                       | OS=Homo sapiens GN=CCDC150   | PE=2       | SV=2      | CC150_HUMAN  | 128,763.10 | 98.10%  | 1 | 1 | 1     | 1.36%  |
| c(-)-Tiva1 | Calcium-binding protein p22                                                                     | OS=Homo sapiens GN=CHP       | PE=1       | SV=3      | CHP1_HUMAN   | 22,457.20  | 0.00%   | 0 | 0 | 0     | 0.00%  |
| c(-)-Tiva1 | Mannose-1-phosphate guanylttransferase alpha                                                    | OS=Homo sapiens GN=GMPPA     | PE=1       | SV=1      | GMPPA_HUMAN  | 46,291.80  | 98.00%  | 1 | 1 | 1     | 5.24%  |
| c(-)-Tiva1 | Ral guanine nucleotide dissociation stimulator-like 2                                           | OS=Homo sapiens GN=RLG2      | PE=1       | SV=1      | RLG2_HUMAN   | 83,549.90  | 57.50%  | 0 | 0 | 0     | 0.00%  |
| c(-)-Tiva1 | Leiomodin-1                                                                                     | OS=Homo sapiens GN=LMOD1     | PE=1       | SV=3      | LMOD1_HUMAN  | 67,032.30  | 99.10%  | 1 | 1 | 1     | 3.33%  |
| c(-)-Tiva1 | Cancer/testis antigen 75                                                                        | OS=Homo sapiens GN=CT75      | PE=2       | SV=2      | CT75_HUMAN   | 40,633.40  | 0.00%   | 0 | 0 | 0     | 0.00%  |
| c(-)-Tiva1 | Disks large-associated protein 1                                                                | OS=Homo sapiens GN=DLGAP1    | PE=1       | SV=1      | DLGP1_HUMAN  | 108,874.40 | 99.80%  | 2 | 2 | 2     | 3.79%  |
| c(-)-Tiva1 | Proline-rich transmembrane protein 3                                                            | OS=Homo sapiens GN=PRRT3     | PE=1       | SV=3      | PRRT3_HUMAN  | 102,198.30 | 0.00%   | 0 | 0 | 0     | 0.00%  |
| c(-)-Tiva1 | Epithelial cell-transforming sequence 2 oncogene-like                                           | OS=Homo sapiens GN=ECT2L     | PE=2       | SV=2      | ECT2L_HUMAN  | 104,884.00 | 0.00%   | 0 | 0 | 0     | 0.00%  |
| c(-)-Tiva1 | Epilakin                                                                                        | OS=Homo sapiens GN=EPPK1     | PE=1       | SV=2      | EPIPL_HUMAN  | 555,615.40 | 100.00% | 2 | 2 | 2     | 1.10%  |
| c(-)-Tiva1 | DNA deoxydouridylic synthase domain-containing protein 2                                        | OS=Homo sapiens GN=RPUSD2    | PE=1       | SV=2      | RUSD2_HUMAN  | 61,310.90  | 0.00%   | 0 | 0 | 0     | 0.00%  |
| c(-)-Tiva1 | Myosin heavy chain 8, axonemal                                                                  | OS=Homo sapiens GN=DNAH8     | PE=1       | SV=2      | DYH8_HUMAN   | 514,672.10 | 52.60%  | 0 | 0 | 0     | 0.00%  |
| c(-)-Tiva1 | Phosphatase and actin regulator 1                                                               | OS=Homo sapiens GN=PHACTR1   | PE=2       | SV=3      | PHAR1_HUMAN  | 66,309.60  | 0.00%   | 0 | 0 | 0     | 0.00%  |
| c(-)-Tiva1 | Nucleosome-remodeling factor subunit BPTF                                                       | OS=Homo sapiens GN=BPTF      | PE=1       | SV=3      | BPTF_HUMAN   | 338,256.30 | 99.80%  | 1 | 1 | 1     | 0.43%  |
| c(-)-Tiva1 | Protein MMS22-like                                                                              | OS=Homo sapiens GN=MMS22L    | PE=1       | SV=3      | MMS22_HUMAN  | 142,325.00 | 0.00%   | 0 | 0 | 0     | 0.00%  |
| c(-)-Tiva1 | Inhibitor                                                                                       | OS=Homo sapiens GN=PHB       | PE=1       | SV=1      | PHB_HUMAN    | 29,804.60  | 99.10%  | 1 | 1 | 1     | 11.80% |
| c(-)-Tiva1 | Large subunit GTPase 1 homolog                                                                  | OS=Homo sapiens GN=LSG1      | PE=1       | SV=2      | LSG1_HUMAN   | 75,226.10  | 0.00%   | 0 | 0 | 0     | 0.00%  |
| c(-)-Tiva1 | Heterogeneous nuclear ribonucleoprotein Q                                                       | OS=Homo sapiens GN=SYNCRIP   | PE=1       | SV=2      | HNRPQ_HUMAN  | 69,603.50  | 80.60%  | 0 | 0 | 0     | 0.00%  |
| c(-)-Tiva1 | SUMO-activating enzyme subunit 1                                                                | OS=Homo sapiens GN=SAE1      | PE=1       | SV=1      | SAE1_HUMAN   | 38,450.10  | 96.10%  | 1 | 1 | 1     | 5.49%  |
| c(-)-Tiva1 | Cathepsin L2                                                                                    | OS=Homo sapiens GN=CTSL2     | PE=1       | SV=2      | CATL2_HUMAN  | 37,329.20  | 0.00%   | 0 | 0 | 0     | 0.00%  |
| c(-)-Tiva1 | WD repeat-containing protein 87                                                                 | OS=Homo sapiens GN=WDR87     | PE=2       | SV=3      | WDR87_HUMAN  | 333,188.80 | 61.90%  | 0 | 0 | 0     | 0.00%  |
| c(-)-Tiva1 | Src substrate cortactin                                                                         | OS=Homo sapiens GN=CTTN      | PE=1       | SV=2      | SRC8_HUMAN   | 61,585.50  | 84.70%  | 1 | 1 | 1     | 3.64%  |
| c(-)-Tiva1 | 26S protease regulatory subunit 7                                                               | OS=Homo sapiens GN=PSMC2     | PE=1       | SV=3      | PRS7_HUMAN   | 48,635.60  | 0.00%   | 0 | 0 | 0     | 0.00%  |
| c(-)-Tiva1 | Zinc finger protein 704                                                                         | OS=Homo sapiens GN=ZNF704    | PE=2       | SV=1      | ZN704_HUMAN  | 45,276.50  | 94.20%  | 1 | 1 | 1     | 5.10%  |
| c(-)-Tiva1 | Histone-lysine N-methyltransferase SETDB1                                                       | OS=Homo sapiens GN=SETDB1    | PE=1       | SV=1      | SETB1_HUMAN  | 143,159.40 | 0.00%   | 0 | 0 | 0     | 0.00%  |
| c(-)-Tiva1 | MAGE-like protein 2                                                                             | OS=Homo sapiens GN=MAGEL2    | PE=1       | SV=1      | MAGL2_HUMAN  | 58,670.50  | 0.00%   | 0 | 0 | 0     | 0.00%  |
| c(-)-Tiva1 | Cell division cycle protein 27 homolog                                                          | OS=Homo sapiens GN=CDCT27    | PE=1       | SV=2      | CDCT27_HUMAN | 91,870.50  | 0.00%   | 0 | 0 | 0     | 0.00%  |
| c(-)-Tiva1 | A-kinase anchor protein 1, mitochondrial                                                        | OS=Homo sapiens GN=AKAP1     | PE=1       | SV=1      | AKAP1_HUMAN  | 97,341.50  | 85.00%  | 0 | 0 | 0     | 1.00%  |
| c(-)-Tiva1 | Ephrin type-A receptor 5                                                                        | OS=Homo sapiens GN=EPHA5     | PE=1       | SV=3      | EPHA5_HUMAN  | 114,804.00 | 99.90%  | 1 | 1 | 1     | 4.05%  |
| c(-)-Tiva1 | GNDF family receptor alpha-3                                                                    | OS=Homo sapiens GN=GFR43     | PE=1       | SV=2      | GFR43_HUMAN  | 44,511.20  | 92.50%  | 1 | 1 | 1     | 7.00%  |
| c(-)-Tiva1 | Vimentin                                                                                        | OS=Homo sapiens GN=VIM       | PE=1       | SV=4      | VIME_HUMAN   | 53,652.70  | 100.00% | 2 | 2 | 2     | 7.08%  |
| c(-)-Tiva1 | Guanine nucleotide-binding protein G(I) subunit alpha-1                                         | OS=Homo sapiens GN=GNAI1     | PE=1       | SV=2      | GNAI1_HUMAN  | 40,362.50  | 100.00% | 3 | 3 | 3     | 11.00% |
| c(-)-Tiva1 | Adenylosuccinate lyase                                                                          | OS=Homo sapiens GN=ADSL      | PE=1       | SV=2      | PUR8_HUMAN   | 54,890.50  | 99.90%  | 1 | 1 | 1     | 5.37%  |
| c(-)-Tiva1 | Piezo-type mechanosensitive ion channel component 2                                             | OS=Homo sapiens GN=PIEZO2    | PE=2       | SV=2      | PIEZ2_HUMAN  | 318,073.20 | 99.80%  | 1 | 1 | 1     | 0.65%  |
| c(-)-Tiva1 | Fibrillin-2                                                                                     | OS=Homo sapi                 |            |           |              |            |         |   |   |       |        |











|            |                                                                                                                |              |            |         |    |    |    |        |
|------------|----------------------------------------------------------------------------------------------------------------|--------------|------------|---------|----|----|----|--------|
| c(-)-Tiva1 | Rhabdoid tumor deletion region protein 1 OS=Homo sapiens GN=RTDR1 PE=2 SV=1                                    | RTDR1_HUMAN  | 38,592.90  | 99.00%  | 1  | 1  | 1  | 8.05%  |
| c(-)-Tiva1 | MYCBP-associated protein OS=Homo sapiens GN=MYCBAP PE=1 SV=2                                                   | MYBPP_HUMAN  | 108,155.60 | 98.80%  | 1  | 1  | 1  | 0.63%  |
| c(-)-Tiva1 | Atrial natriuretic peptide receptor 3 OS=Homo sapiens GN=NP3R PE=1 SV=2                                        | ANPRC_HUMAN  | 59,808.90  | 99.10%  | 1  | 1  | 1  | 4.62%  |
| c(-)-Tiva1 | Serine palmitoyltransferase 3 OS=Homo sapiens GN=SPTLC3 PE=1 SV=3                                              | SPTC3_HUMAN  | 62,051.20  | 0.00%   | 0  | 0  | 0  | 0.00%  |
| c(-)-Tiva1 | WD repeat and FYVE domain-containing protein 1 OS=Homo sapiens GN=WDFY1 PE=1 SV=1                              | WDFY1_HUMAN  | 46,323.50  | 0.00%   | 0  | 0  | 0  | 0.00%  |
| c(-)-Tiva1 | Serine/arginine repetitive matrix protein 2 OS=Homo sapiens GN=SRRM2 PE=1 SV=2                                 | SRRM2_HUMAN  | 299,621.60 | 0.00%   | 0  | 0  | 0  | 0.00%  |
| c(-)-Tiva1 | Serine/threonine-protein kinase WNK4 OS=Homo sapiens GN=WNK4 PE=1 SV=1                                         | WNK4_HUMAN   | 134,741.20 | 94.90%  | 1  | 1  | 1  | 2.33%  |
| c(-)-Tiva1 | Fibrocystin OS=Homo sapiens GN=PKHD1 PE=1 SV=1                                                                 | PKHD1_HUMAN  | 446,693.40 | 37.30%  | 0  | 0  | 0  | 0.00%  |
| c(-)-Tiva1 | Sterol regulatory element-binding protein 2 OS=Homo sapiens GN=SREBF2 PE=1 SV=2                                | SRBP2_HUMAN  | 123,688.10 | 0.00%   | 0  | 0  | 0  | 0.00%  |
| c(-)-Tiva1 | Neurotropsin OS=Homo sapiens GN=PRSS12 PE=2 SV=2                                                               | NETR_HUMAN   | 97,065.50  | 90.70%  | 1  | 1  | 1  | 1.83%  |
| c(-)-Tiva1 | Protein turtle homolog A OS=Homo sapiens GN=IGSF9 PE=1 SV=2                                                    | TUTLA_HUMAN  | 126,580.10 | 0.00%   | 0  | 0  | 0  | 0.00%  |
| c(-)-Tiva1 | Bone morphogenetic protein 6 OS=Homo sapiens GN=BMP6 PE=1 SV=1                                                 | BMP6_HUMAN   | 57,225.20  | 0.00%   | 0  | 0  | 0  | 0.00%  |
| c(-)-Tiva1 | Paternally-expressed gene 3 protein OS=Homo sapiens GN=PEG3 PE=2 SV=1                                          | PEG3_HUMAN   | 180,826.90 | 66.30%  | 0  | 0  | 0  | 0.00%  |
| c(-)-Tiva1 | Alpha-2-macroglobulin OS=Homo sapiens GN=A2M PE=1 SV=3                                                         | A2MG_HUMAN   | 163,289.90 | 0.00%   | 0  | 0  | 0  | 0.00%  |
| c(-)-Tiva1 | Myotubularin-related protein 13 OS=Homo sapiens GN=SBF2 PE=1 SV=1                                              | MTMRD_HUMAN  | 208,467.50 | 0.00%   | 0  | 0  | 0  | 0.00%  |
| c(-)-Tiva1 | Clathrin heavy chain 1 OS=Homo sapiens GN=CLTC PE=1 SV=5                                                       | CLH1_HUMAN   | 191,618.90 | 100.00% | 13 | 13 | 13 | 13.60% |
| c(-)-Tiva1 | Ig gamma-3 chain C region OS=Homo sapiens GN=IGHG3 PE=1 SV=2                                                   | IGHG3_HUMAN  | 41,285.90  | 99.10%  | 1  | 1  | 1  | 5.31%  |
| c(-)-Tiva1 | Fibronectin type III and SPRY domain-containing protein 1 OS=Homo sapiens GN=FSD1 PE=1 SV=1                    | FSD1_HUMAN   | 55,820.20  | 99.10%  | 1  | 1  | 1  | 5.85%  |
| c(-)-Tiva1 | Mucin-5AC (Fragments) OS=Homo sapiens GN=MUC5AC PE=1 SV=3                                                      | MUC5A_HUMAN  | 526,585.10 | 100.00% | 2  | 2  | 2  | 0.82%  |
| c(-)-Tiva1 | Transient receptor potential cation channel subfamily V member 2 OS=Homo sapiens GN=TRPV2 PE=1 SV=1            | TRPV2_HUMAN  | 85,983.70  | 0.00%   | 0  | 0  | 0  | 0.00%  |
| c(-)-Tiva1 | Secretory phospholipase A2 receptor OS=Homo sapiens GN=PLA2R1 PE=1 SV=2                                        | PLA2R_HUMAN  | 168,601.50 | 35.70%  | 0  | 0  | 0  | 0.00%  |
| c(-)-Tiva1 | Zinc finger and BTB domain-containing protein 34 OS=Homo sapiens GN=ZBTB34 PE=2 SV=4                           | ZBT34_HUMAN  | 55,533.70  | 83.30%  | 0  | 0  | 0  | 0.00%  |
| c(-)-Tiva1 | UPF0688 protein C1orf174 OS=Homo sapiens GN=C1orf174 PE=1 SV=2                                                 | CA174_HUMAN  | 25,976.80  | 78.60%  | 0  | 0  | 0  | 0.00%  |
| c(-)-Tiva1 | Multidrug resistance protein 1 OS=Homo sapiens GN=ABCB1 PE=1 SV=3                                              | MDR1_HUMAN   | 141,483.90 | 0.00%   | 0  | 0  | 0  | 0.00%  |
| c(-)-Tiva1 | Protein PRRC2B OS=Homo sapiens GN=PRRC2B PE=1 SV=2                                                             | PRC2B_HUMAN  | 242,966.90 | 99.10%  | 1  | 1  | 1  | 1.17%  |
| c(-)-Tiva1 | SH3 and multiple ankyrin repeat domains protein 2 OS=Homo sapiens GN=SHANK2 PE=1 SV=3                          | SHAN2_HUMAN  | 158,824.90 | 93.90%  | 0  | 0  | 0  | 0.00%  |
| c(-)-Tiva1 | Complement component C6 OS=Homo sapiens GN=C6 PE=1 SV=3                                                        | CO6_HUMAN    | 104,786.20 | 0.00%   | 0  | 0  | 0  | 0.00%  |
| c(-)-Tiva1 | Breast cancer type 1 susceptibility protein OS=Homo sapiens GN=BRCA1 PE=1 SV=2                                 | BRCA1_HUMAN  | 207,720.30 | 0.00%   | 0  | 0  | 0  | 0.00%  |
| c(-)-Tiva1 | Fibroblast growth factor 18 OS=Homo sapiens GN=FGF18 PE=1 SV=1                                                 | FGF18_HUMAN  | 23,988.90  | 0.00%   | 0  | 0  | 0  | 0.00%  |
| c(-)-Tiva1 | Uncharacterized protein C21orf56 OS=Homo sapiens GN=C21orf56 PE=2 SV=3                                         | CU056_HUMAN  | 37,614.50  | 0.00%   | 0  | 0  | 0  | 0.00%  |
| c(-)-Tiva1 | Talin-1 OS=Homo sapiens GN=TLN1 PE=1 SV=3                                                                      | TLN1_HUMAN   | 269,765.10 | 99.90%  | 1  | 1  | 1  | 1.02%  |
| c(-)-Tiva1 | Filamin A-interacting protein 1-like OS=Homo sapiens GN=FLIP1L PE=1 SV=2                                       | FIL1L_HUMAN  | 130,385.60 | 0.00%   | 0  | 0  | 0  | 0.00%  |
| c(-)-Tiva1 | Proto-oncogene tyrosine-protein kinase ROS OS=Homo sapiens GN=ROS1 PE=1 SV=3                                   | ROS1_HUMAN   | 263,919.20 | 0.00%   | 0  | 0  | 0  | 0.00%  |
| c(-)-Tiva1 | MAP7 domain-containing protein 3 OS=Homo sapiens GN=MAP7D3 PE=1 SV=2                                           | MA7D3_HUMAN  | 98,430.80  | 82.90%  | 0  | 0  | 0  | 0.00%  |
| c(-)-Tiva1 | Zinc finger protein 883 OS=Homo sapiens GN=ZNF883 PE=2 SV=1                                                    | ZN883_HUMAN  | 43,965.60  | 99.10%  | 1  | 1  | 1  | 6.33%  |
| c(-)-Tiva1 | Angiotensin-converting enzyme 2 OS=Homo sapiens GN=ACE2 PE=1 SV=2                                              | ACE2_HUMAN   | 92,465.40  | 99.10%  | 1  | 1  | 1  | 3.11%  |
| c(-)-Tiva1 | Tyrosine-protein kinase JAK2 OS=Homo sapiens GN=JAK2 PE=1 SV=2                                                 | JAK2_HUMAN   | 130,678.80 | 98.10%  | 1  | 1  | 1  | 2.47%  |
| c(-)-Tiva1 | Dynein heavy chain 6, axonemal OS=Homo sapiens GN=DNAH6 PE=1 SV=3                                              | DYH6_HUMAN   | 475,988.50 | 0.00%   | 0  | 0  | 0  | 0.00%  |
| c(-)-Tiva1 | R-spondin-3 OS=Homo sapiens GN=RSPO3 PE=2 SV=1                                                                 | RSPO3_HUMAN  | 30,928.60  | 0.00%   | 0  | 0  | 0  | 0.00%  |
| c(-)-Tiva1 | Rho guanine nucleotide exchange factor 3 OS=Homo sapiens GN=ARHGEF3 PE=2 SV=1                                  | ARHG3_HUMAN  | 59,784.00  | 0.00%   | 0  | 0  | 0  | 0.00%  |
| c(-)-Tiva1 | Keratin, type I cytoskeletal 10 OS=Homo sapiens GN=KRT10 PE=1 SV=6                                             | K1C10_HUMAN  | 58,828.80  | 100.00% | 1  | 1  | 1  | 3.25%  |
| c(-)-Tiva1 | Sorting nexin-6 OS=Homo sapiens GN=SNX6 PE=1 SV=1                                                              | SNX6_HUMAN   | 46,650.40  | 0.00%   | 0  | 0  | 0  | 0.00%  |
| c(-)-Tiva1 | Putative tropomyosin alpha-3 chain-like protein OS=Homo sapiens PE=5 SV=2                                      | TPM3L_HUMAN  | 26,270.00  | 99.10%  | 1  | 1  | 1  | 7.62%  |
| c(-)-Tiva1 | T-complex protein 1 subunit beta OS=Homo sapiens GN=CTC2 PE=1 SV=4                                             | TCPB_HUMAN   | 57,489.90  | 0.00%   | 0  | 0  | 0  | 0.00%  |
| c(-)-Tiva1 | 7SK snRNA methylphosphate capping enzyme OS=Homo sapiens GN=MEPCE PE=1 SV=1                                    | MEPCE_HUMAN  | 74,355.60  | 0.00%   | 0  | 0  | 0  | 0.00%  |
| c(-)-Tiva1 | Prospero homeobox protein 2 OS=Homo sapiens GN=PROX2 PE=2 SV=3                                                 | PROX2_HUMAN  | 65,586.90  | 0.00%   | 0  | 0  | 0  | 0.00%  |
| c(-)-Tiva1 | Coiled-coil domain-containing protein 13 OS=Homo sapiens GN=CDC13 PE=2 SV=2                                    | CCD13_HUMAN  | 80,884.90  | 0.00%   | 0  | 0  | 0  | 0.00%  |
| c(-)-Tiva1 | Disrupted in schizophrenia 1 protein OS=Homo sapiens GN=DISC1 PE=1 SV=3                                        | DISC1_HUMAN  | 93,612.40  | 0.00%   | 0  | 0  | 0  | 0.00%  |
| c(-)-Tiva1 | DnaI homolog subfamily C member 13 OS=Homo sapiens GN=DNAIC13 PE=1 SV=5                                        | DJC13_HUMAN  | 254,422.90 | 0.00%   | 0  | 0  | 0  | 0.00%  |
| c(-)-Tiva1 | WD repeat-containing protein 85 OS=Homo sapiens GN=WDR85 PE=2 SV=2                                             | WDR85_HUMAN  | 50,575.70  | 0.00%   | 0  | 0  | 0  | 0.00%  |
| c(-)-Tiva1 | HERV-K_5q33.3 provirus ancestral Pol protein OS=Homo sapiens GN=ZSWIM6 PE=2 SV=2                               | POK10_HUMAN  | 114,829.90 | 98.30%  | 1  | 1  | 1  | 2.47%  |
| c(-)-Tiva1 | Vacuolar protein sorting-associated protein 35 OS=Homo sapiens GN=VPS35 PE=1 SV=2                              | VPS35_HUMAN  | 91,710.00  | 0.00%   | 0  | 0  | 0  | 0.00%  |
| c(-)-Tiva1 | Zinc finger SWIM domain-containing protein 6 OS=Homo sapiens GN=ZSWIM6 PE=2 SV=2                               | ZSWIM6_HUMAN | 133,473.40 | 100.00% | 2  | 2  | 2  | 4.86%  |
| c(-)-Tiva1 | Alpha-actinin-4 OS=Homo sapiens GN=ACTN4 PE=1 SV=2                                                             | ACTN4_HUMAN  | 104,857.20 | 100.00% | 17 | 18 | 18 | 23.90% |
| c(-)-Tiva1 | Probable threonine--tRNA ligase 2, cytoplasmic OS=Homo sapiens GN=TARSL2 PE=1 SV=1                             | SYTC2_HUMAN  | 92,648.60  | 31.00%  | 0  | 0  | 0  | 0.00%  |
| c(-)-Tiva1 | Polycystin-2 OS=Homo sapiens GN=PKD2 PE=1 SV=3                                                                 | PKD2_HUMAN   | 109,694.20 | 0.00%   | 0  | 0  | 0  | 0.00%  |
| c(-)-Tiva1 | NADH dehydrogenase [ubiquinone] 1 alpha subcomplex subunit 9, mitochondrial OS=Homo sapiens GN=NDUF9 PE=1 SV=2 | NDUA9_HUMAN  | 42,510.10  | 0.00%   | 0  | 0  | 0  | 0.00%  |
| c(-)-Tiva1 | HLA class I histocompatibility antigen, Cw-4 alpha chain OS=Homo sapiens GN=HLA-C PE=1 SV=1                    | 1C04_HUMAN   | 40,994.50  | 99.10%  | 1  | 1  | 1  | 9.84%  |
| c(-)-Tiva1 | Cell growth-regulating nuclear protein OS=Homo sapiens GN=LYAR PE=1 SV=2                                       | LYAR_HUMAN   | 43,615.10  | 95.20%  | 1  | 1  | 1  | 3.43%  |
| c(-)-Tiva1 | Mitochondrial intermediate peptidase OS=Homo sapiens GN=MIPEP PE=1 SV=2                                        | MIPEP_HUMAN  | 80,643.30  | 91.80%  | 1  | 1  | 1  | 1.82%  |
| c(-)-Tiva1 | 43 kDa receptor-associated protein of the synapse OS=Homo sapiens GN=RAPSN PE=1 SV=4                           | RAPSN_HUMAN  | 46,329.20  | 69.50%  | 0  | 0  | 0  | 0.00%  |
| c(-)-Tiva1 | Adenylate kinase domain-containing protein 1 OS=Homo sapiens GN=AKD1 PE=1 SV=2                                 | AKD1_HUMAN   | 221,420.20 | 0.00%   | 0  | 0  | 0  | 0.00%  |
| c(-)-Tiva1 | Zinc finger protein 443 OS=Homo sapiens GN=ZNF443 PE=2 SV=2                                                    | ZN443_HUMAN  | 77,515.30  | 23.10%  | 0  | 0  | 0  | 0.00%  |
| c(-)-Tiva1 | Protocadherin Fat 1 OS=Homo sapiens GN=FAT1 PE=1 SV=2                                                          | FAT1_HUMAN   | 506,263.50 | 99.90%  | 1  | 1  | 1  | 0.70%  |
| c(-)-Tiva1 | Cysteine and glycine-rich protein 1 OS=Homo sapiens GN=CSRP1 PE=1 SV=3                                         | CSRP1_HUMAN  | 20,567.10  | 98.70%  | 1  | 1  | 1  | 14.00% |
| c(-)-Tiva1 | Short stature homeobox protein 2 OS=Homo sapiens GN=SHOX2 PE=2 SV=4                                            | SHOX2_HUMAN  | 34,953.20  | 99.10%  | 1  | 1  | 1  | 10.30% |
| c(-)-Tiva1 | Testis anion transporter 1 OS=Homo sapiens GN=SLC26A8 PE=1 SV=1                                                | S26A8_HUMAN  | 109,009.40 | 0.00%   | 0  | 0  | 0  | 0.00%  |
| c(-)-Tiva1 | Nephrocystin-3 OS=Homo sapiens GN=NPHP3 PE=1 SV=1                                                              | NPHP3_HUMAN  | 150,869.90 | 0.00%   | 0  | 0  | 0  | 0.00%  |
| c(-)-Tiva1 | WD repeat and FYVE domain-containing protein 2 OS=Homo sapiens GN=WDFY2 PE=2 SV=2                              | WDFY2_HUMAN  | 45,153.20  | 0.00%   | 0  | 0  | 0  | 0.00%  |
| c(-)-Tiva1 | Kyphoscoliosis peptidase OS=Homo sapiens GN=KY PE=1 SV=2                                                       | KY_HUMAN     | 63,855.50  | 84.60%  | 1  | 1  | 1  | 5.70%  |
| c(-)-Tiva1 | Neurogenin-2 OS=Homo sapiens GN=NEUROG2 PE=1 SV=2                                                              | NGN2_HUMAN   | 28,621.70  | 65.10%  | 0  | 0  | 0  | 0.00%  |
| c(-)-Tiva1 | Tetratricopeptide repeat protein 19, mitochondrial OS=Homo sapiens GN=TTC19 PE=1 SV=4                          | TTC19_HUMAN  | 42,458.60  | 84.10%  | 1  | 1  | 1  | 5.79%  |
| c(-)-Tiva1 | Clusterin OS=Homo sapiens GN=CLU PE=1 SV=1                                                                     | CLUS_HUMAN   | 52,495.00  | 0.00%   | 0  | 0  | 0  | 0.00%  |
| c(-)-Tiva1 | Putative tubulin beta chain-like protein ENSPO0000290377 OS=Homo sapiens PE=5 SV=2                             | YI016_HUMAN  | 41,775.60  | 86.00%  | 1  | 1  | 1  | 8.06%  |
| c(-)-Tiva1 | Kelch-like protein 18 OS=Homo sapiens GN=KLHL18 PE=2 SV=3                                                      | KLH18_HUMAN  | 63,637.70  | 94.70%  | 1  | 1  | 1  | 4.01%  |
| c(-)-Tiva1 | Neuroblast differentiation-associated protein AHNAK OS=Homo sapiens GN=AHNAK PE=1 SV=2                         | AHNK_HUMAN   | 629,104.40 | 100.00% | 2  | 2  | 2  | 0.56%  |
| c(-)-Tiva1 | Phosphatidylinositol 3,4,5-trisphosphate-dependent Rac exchanger 1 protein OS=Homo sapiens GN=PREX1 PE=1 SV=3  | PREX1_HUMAN  | 186,206.70 | 0.00%   | 0  | 0  | 0  | 0.00%  |
| c(-)-Tiva1 | Exportin-1 OS=Homo sapiens GN=XPO1 PE=1 SV=1                                                                   | XPO1_HUMAN   | 123,388.90 | 78.60%  | 0  | 0  | 0  | 0.00%  |
| c(-)-Tiva1 | Zinc finger protein 891 OS=Homo sapiens GN=ZNF891 PE=2 SV=2                                                    | ZN891_HUMAN  | 63,591.40  | 86.10%  | 1  | 1  | 1  | 2.57%  |
| c(-)-Tiva1 | Proto-oncogene tyrosine-protein kinase Src OS=Homo sapiens GN=SRC PE=1 SV=3                                    | SRC_HUMAN    | 59,835.80  | 99.90%  | 1  | 1  | 1  | 2.99%  |
| c(-)-Tiva1 | LETM1 domain-containing protein 1 OS=Homo sapiens GN=LETMD1 PE=1 SV=1                                          | LTMD1_HUMAN  | 41,792.20  | 88.80%  | 1  | 1  | 1  | 6.11%  |
| c(-)-Tiva1 | Leucine-rich repeat flightless-interacting protein 1 OS=Homo sapiens GN=LRRFIP1 PE=1 SV=2                      | LRRF1_HUMAN  | 89,252.60  | 100.00% | 3  | 3  | 3  | 7.18%  |
| c(-)-Tiva1 | Cholinesterase OS=Homo sapiens GN=BCHE PE=1 SV=1                                                               | CHLE_HUMAN   | 68,420.10  | 0.00%   | 0  | 0  | 0  | 0.00%  |
| c(-)-Tiva1 | Vang-like protein 1 OS=Homo sapiens GN=VANGL1 PE=1 SV=1                                                        | VANG1_HUMAN  | 59,977.00  | 98.90%  | 1  | 1  | 1  | 5.92%  |
| c(-)-Tiva1 | NAD(P)H dehydrogenase [quinone] 1 OS=Homo sapiens GN=NQO1 PE=1 SV=1                                            | NQO1_HUMAN   | 30,869.00  | 100.00% | 6  | 6  | 6  | 27.00% |
| c(-)-Tiva1 | Probable ATP-dependent RNA helicase DDX4 OS=Homo sapiens GN=DDX4 PE=2 SV=2                                     | DDX4_HUMAN   | 79,309.10  | 99.90%  | 1  | 1  | 1  | 3.04%  |
| c(-)-Tiva1 | 1-phosphatidylinositol 4,5-bisphosphate phosphodiesterase epsilon-1 OS=Homo sapiens GN=PLCE1 PE=1 SV=3         | PLCE1_HUMAN  | 258,718.10 | 99.10%  | 1  | 1  | 1  | 1.43%  |
| c(-)-Tiva1 | Clathrin heavy chain 2 OS=Homo sapiens GN=CLTCL1 PE=1 SV=2                                                     | CLH2_HUMAN   | 187,033.20 | 24.00%  | 0  | 0  | 0  | 0.00%  |
| c(-)-Tiva1 | Tropomyosin alpha-3 chain OS=Homo sapiens GN=TPM3 PE=1 SV=1                                                    | TPM3_HUMAN   | 32,820.20  | 99.10%  | 1  | 1  | 1  | 5.28%  |
| c(-)-Tiva1 | Rho guanine nucleotide exchange factor 25 OS=Homo sapiens GN=ARHGEF25 PE=1 SV=2                                | ARHPG_HUMAN  | 63,843.90  | 88.40%  | 1  | 1  | 1  | 2.41%  |
| c(-)-Tiva1 | Spermatogenesis-associated protein 13 OS=Homo sapiens GN=SPATA13 PE=1 SV=1                                     | SPT13_HUMAN  | 74,821.00  | 99.10%  | 1  | 1  | 1  | 2.15%  |
| c(-)-Tiva1 | Fatty acid synthase OS=Homo sapiens GN=FASN PE=1 SV=3                                                          | FAS_HUMAN    | 273,427.10 | 99.80%  | 1  | 1  | 1  | 1.12%  |
| c(-)-Tiva1 | Coiled-coil domain-containing protein 92 OS=Homo sapiens GN=CCDC92 PE=2 SV=2                                   | CCD92_HUMAN  | 36,961.60  | 0.00%   | 0  | 0  | 0  | 0.00%  |
| c(-)-Tiva1 | Protein FAM102A OS=Homo sapiens GN=FAM102A PE=2 SV=2                                                           | F102A_HUMAN  | 41,785.40  | 0.00%   | 0  | 0  | 0  | 0.00%  |
| c(-)-Tiva1 | Amyloid beta A4 precursor protein-binding family A member 1 OS=Homo sapiens GN=APBA1 PE=1 SV=3                 | APBA1_HUMAN  | 92,865.30  | 99.10%  | 1  | 1  | 1  | 1.79%  |
| c(-)-Tiva1 | Spectrin beta chain, erythrocyte OS=Homo sapiens GN=SPTB PE=1 SV=5                                             | SPTB1_HUMAN  | 246,471.60 | 100.00% | 9  | 9  | 10 | 4.07%  |
| c(-)-Tiva1 | Acyl-coenzyme A thioesterase 4 OS=Homo sapiens GN=ACOT4 PE=1 SV=2                                              | ACOT4_HUMAN  | 46,328.10  | 99.30%  | 1  | 1  | 1  | 2.85%  |
| c(-)-Tiva1 | Kallikrein-2 OS=Homo sapiens GN=KLK2 PE=2 SV=1                                                                 | KLK2_HUMAN   | 28,670.30  | 99.10%  | 1  | 1  | 1  | 4.98%  |
| c(-)-Tiva1 | Inhibitor of nuclear factor kappa-B kinase subunit beta OS=Homo sapiens GN=IKKB PE=1 SV=1                      | IKKB_HUMAN   | 86,565.40  | 98.70%  | 1  | 1  | 1  | 4.76%  |
| c(-)-Tiva1 | Sarcoplasmic/endoplasmic reticulum calcium ATPase 1 OS=Homo sapiens GN=ATP2A1 PE=1 SV=1                        | AT2A1_HUMAN  | 110,254.90 | 100.00% | 2  | 3  | 3  | 4.10%  |
| c(-)-Tiva1 | RUN and FYVE domain-containing protein 4 OS=Homo sapiens GN=RUFY4 PE=2 SV=2                                    | RUFY4_HUMAN  | 64,350.00  | 85.00%  | 1  | 1  | 1  | 3.50%  |
| c(-)-Tiva1 | Leucine-rich repeat-containing protein 3B OS=Homo sapiens GN=LRRC3B PE=2 SV=1                                  | LRC3B_HUMAN  | 29,275.10  | 94.20%  | 1  | 1  | 1  | 7.72%  |
| c(-)-Tiva1 | Condensin-2 complex subunit D3 OS=Homo sapiens GN=NCAPD3 PE=1 SV=2                                             | CND3_HUMAN   | 168,894.10 | 99.90%  | 1  | 1  | 1  | 2.20%  |
| c(-)-Tiva1 | Dynein heavy chain 7, axonemal OS=Homo sapiens GN=DNAH7 PE=1 SV=2                                              | DYH7_HUMAN   | 461,168.40 | 95.50%  | 1  | 1  | 1  | 0.67%  |
| c(-)-Tiva1 | R-spondin-4 OS=Homo sapiens GN=RSPO4 PE=1 SV=2                                                                 | RSPO4_HUMAN  | 26,171.10  | 90.00%  | 1  | 1  | 1  | 6.84%  |
| c(-)-Tiva1 | Eukaryotic translation initiation factor 4E type 1B OS=Homo sapiens GN=EIF4E1B PE=2 SV=3                       | 1E4E1B_HUMAN | 27,596.50  | 0.00%   | 0  | 0  | 0  | 0.00%  |
| c(-)-Tiva1 | Putative RNA-binding protein 15B OS=Homo sapiens GN=RBM15B PE=1 SV=3                                           | RB15B_HUMAN  | 97,208.40  | 99.10%  | 1  | 1  | 1  | 2.47%  |
| c(-)-Tiva1 | Hepatocyte growth factor receptor OS=Homo sapiens GN=MET PE=1 SV=4                                             | MET_HUMAN    | 155,543.40 | 98.90%  | 1  | 1  | 1  | 0.94%  |
| c(-)-Tiva1 | Zinc finger BED domain-containing protein 4 OS=Homo sapiens GN=ZBED4 PE=1 SV=2                                 | ZBED4_HUMAN  | 130,324.70 | 0.00%   | 0  | 0  | 0  | 0.00%  |
| c(-)-Tiva1 | Laminin subunit alpha-5 OS=Homo sapiens GN=LAMA5 PE=1 SV=8                                                     | LAMA5_HUMAN  | 399,725.10 | 100.00% | 1  | 1  | 1  | 0.60%  |
| c(-)-Tiva1 | Probable G-protein coupled receptor 133 OS=Homo sapiens GN=GPR133 PE=2 SV=1                                    | GP133_HUMAN  | 96,530.90  | 0.00%   | 0  | 0  | 0  | 0.00%  |
| c(-)-Tiva1 | Golgi-associated PDZ and coiled-coil motif-containing protein OS=Homo sapiens GN=GOPC PE=1 SV=1                | GOPC_HUMAN   | 50,520.30  | 0.00%   | 0  | 0  | 0  | 0.00%  |
| c(-)-Tiva1 | Arf-GAP with GTPase, ANK repeat and PH domain-containing protein 10 OS=Homo sapiens GN=AGAP10 PE=2 SV=3        | AGA10_HUMAN  | 72,707.50  | 99.10%  | 1  | 1  | 1  | 2.13%  |

|            |                                                                                                               |              |            |         |   |   |    |        |
|------------|---------------------------------------------------------------------------------------------------------------|--------------|------------|---------|---|---|----|--------|
| c(-)-Tiva1 | Protein S100-A2 OS=Homo sapiens GN=S100A2 PE=1 SV=3                                                           | S10A2_HUMAN  | 11,116.80  | 0.00%   | 0 | 0 | 0  | 0.00%  |
| c(-)-Tiva1 | HLA class I histocompatibility antigen, Cw-5 alpha chain OS=Homo sapiens GN=HLA-C PE=2 SV=1                   | 1C05_HUMAN   | 40,911.60  | 84.00%  | 1 | 1 | 1  | 4.64%  |
| c(-)-Tiva1 | Protein ARMCX6 OS=Homo sapiens GN=ARMCX6 PE=1 SV=1                                                            | ARMX6_HUMAN  | 33,020.20  | 87.10%  | 1 | 1 | 1  | 9.33%  |
| c(-)-Tiva1 | NHL repeat-containing protein 3 OS=Homo sapiens GN=NLRC3 PE=2 SV=1                                            | NHLC3_HUMAN  | 38,282.70  | 0.00%   | 0 | 0 | 0  | 0.00%  |
| c(-)-Tiva1 | Putative uncharacterized protein C10orf40 OS=Homo sapiens GN=C10orf40 PE=2 SV=1                               | CJ040_HUMAN  | 15,288.20  | 86.00%  | 1 | 1 | 1  | 14.10% |
| c(-)-Tiva1 | Proline-rich protein 14 OS=Homo sapiens GN=PRR14 PE=1 SV=1                                                    | PRR14_HUMAN  | 64,329.70  | 46.20%  | 0 | 0 | 0  | 0.00%  |
| c(-)-Tiva1 | Polycomb group RING finger protein 2 OS=Homo sapiens GN=PCGF2 PE=1 SV=1                                       | PCGF2_HUMAN  | 37,788.80  | 49.10%  | 0 | 0 | 0  | 0.00%  |
| c(-)-Tiva1 | Probable palmitoyltransferase ZDHHC16 OS=Homo sapiens GN=ZDHHC16 PE=2 SV=1                                    | ZDH16_HUMAN  | 43,633.50  | 0.00%   | 0 | 0 | 0  | 0.00%  |
| c(-)-Tiva1 | H(+)/Cl(-) exchange transporter 5 OS=Homo sapiens GN=CLCN5 PE=1 SV=1                                          | CLCN5_HUMAN  | 83,149.80  | 0.00%   | 0 | 0 | 0  | 0.00%  |
| c(-)-Tiva1 | F-box only protein 48 OS=Homo sapiens GN=FBXO48 PE=2 SV=1                                                     | FBX48_HUMAN  | 18,241.20  | 92.20%  | 1 | 1 | 1  | 11.60% |
| c(-)-Tiva1 | DNA-directed RNA polymerase III subunit RPC2 OS=Homo sapiens GN=POLR3B PE=1 SV=2                              | RPC2_HUMAN   | 127,788.80 | 100.00% | 2 | 2 | 2  | 1.68%  |
| c(-)-Tiva1 | Unconventional myosin-X OS=Homo sapiens GN=MYO10 PE=1 SV=3                                                    | MYO10_HUMAN  | 237,351.10 | 100.00% | 3 | 3 | 3  | 2.62%  |
| c(-)-Tiva1 | Zinc finger protein 266 OS=Homo sapiens GN=ZNF266 PE=2 SV=2                                                   | ZN266_HUMAN  | 62,115.50  | 0.00%   | 0 | 0 | 0  | 0.00%  |
| c(-)-Tiva1 | 60 kDa heat shock protein, mitochondrial OS=Homo sapiens GN=HSPD1 PE=1 SV=2                                   | CH60_HUMAN   | 61,055.70  | 100.00% | 2 | 2 | 2  | 7.68%  |
| c(-)-Tiva1 | Plasminogen OS=Homo sapiens GN=PLG PE=1 SV=2                                                                  | PLMN_HUMAN   | 90,567.40  | 0.00%   | 0 | 0 | 0  | 0.00%  |
| c(-)-Tiva1 | Protocadherin Fat 2 OS=Homo sapiens GN=FAT2 PE=1 SV=2                                                         | FAT2_HUMAN   | 479,309.20 | 99.10%  | 1 | 1 | 1  | 0.28%  |
| c(-)-Tiva1 | tRNA wybutosine-synthesizing protein 1 homolog B OS=Homo sapiens GN=TYW18 PE=2 SV=2                           | TYW18_HUMAN  | 76,946.80  | 99.10%  | 1 | 1 | 1  | 4.19%  |
| c(-)-Tiva1 | Collagen alpha-1(XVI) chain OS=Homo sapiens GN=COL16A1 PE=1 SV=2                                              | COGA1_HUMAN  | 157,751.50 | 83.10%  | 0 | 0 | 0  | 0.00%  |
| c(-)-Tiva1 | Putative zinc finger protein 487 OS=Homo sapiens GN=ZNF487P PE=5 SV=3                                         | ZN487_HUMAN  | 51,623.90  | 100.00% | 1 | 1 | 1  | 6.92%  |
| c(-)-Tiva1 | Ski oncogene OS=Homo sapiens GN=SKI PE=1 SV=1                                                                 | SKI_HUMAN    | 80,006.10  | 95.20%  | 1 | 1 | 1  | 5.36%  |
| c(-)-Tiva1 | DNA replication licensing factor MCM7 OS=Homo sapiens GN=MCM7 PE=1 SV=4                                       | MCM7_HUMAN   | 81,309.00  | 0.00%   | 0 | 0 | 0  | 0.00%  |
| c(-)-Tiva1 | Protein FAM133A OS=Homo sapiens GN=FAM133A PE=2 SV=1                                                          | F133A_HUMAN  | 28,941.70  | 99.10%  | 1 | 1 | 1  | 10.50% |
| c(-)-Tiva1 | Leucine-rich repeat serine/threonine-protein kinase 2 OS=Homo sapiens GN=LRKK2 PE=1 SV=2                      | LRKK2_HUMAN  | 286,110.80 | 32.40%  | 0 | 0 | 0  | 0.00%  |
| c(-)-Tiva1 | Dual specificity protein phosphatase CDC14A OS=Homo sapiens GN=CDC14A PE=1 SV=1                               | CC14A_HUMAN  | 66,576.90  | 0.00%   | 0 | 0 | 0  | 0.00%  |
| c(-)-Tiva1 | Zinc finger protein 106 homolog OS=Homo sapiens GN=ZFP106 PE=1 SV=1                                           | ZF106_HUMAN  | 208,882.90 | 0.00%   | 0 | 0 | 0  | 0.00%  |
| c(-)-Tiva1 | Integrin beta-8 OS=Homo sapiens GN=ITGB8 PE=1 SV=1                                                            | ITB8_HUMAN   | 85,631.30  | 99.10%  | 1 | 1 | 1  | 4.29%  |
| c(-)-Tiva1 | Kinetochore-associated protein DSN1 homolog OS=Homo sapiens GN=DSN1 PE=1 SV=2                                 | DSN1_HUMAN   | 40,067.80  | 0.00%   | 0 | 0 | 0  | 0.00%  |
| c(-)-Tiva1 | Protein NPAT OS=Homo sapiens GN=NPAT PE=1 SV=3                                                                | NPAT_HUMAN   | 154,290.70 | 93.90%  | 1 | 1 | 1  | 1.40%  |
| c(-)-Tiva1 | Coiled-coil domain-containing protein 116 OS=Homo sapiens GN=CCDC116 PE=2 SV=2                                | CC116_HUMAN  | 56,940.90  | 89.10%  | 1 | 1 | 1  | 3.50%  |
| c(-)-Tiva1 | DENN domain-containing protein 1A OS=Homo sapiens GN=DENND1A PE=1 SV=2                                        | DEN1A_HUMAN  | 110,580.40 | 96.00%  | 1 | 1 | 1  | 3.47%  |
| c(-)-Tiva1 | POTE ankryrin domain family member E OS=Homo sapiens GN=POTEE PE=1 SV=3                                       | POTEE_HUMAN  | 121,366.20 | 100.00% | 2 | 2 | 2  | 3.26%  |
| c(-)-Tiva1 | E3 ubiquitin-protein ligase TRIM36 OS=Homo sapiens GN=TRIM36 PE=2 SV=2                                        | TR136_HUMAN  | 83,015.40  | 99.90%  | 1 | 1 | 1  | 3.30%  |
| c(-)-Tiva1 | Zinc finger protein 608 OS=Homo sapiens GN=ZNF608 PE=1 SV=4                                                   | ZN608_HUMAN  | 162,210.60 | 87.00%  | 1 | 1 | 1  | 1.26%  |
| c(-)-Tiva1 | Keratin, type II cuticular Hb3 OS=Homo sapiens GN=KRT83 PE=1 SV=2                                             | KRT83_HUMAN  | 54,194.90  | 0.00%   | 0 | 0 | 0  | 0.00%  |
| c(-)-Tiva1 | Complement C1r subcomponent-like protein OS=Homo sapiens GN=C1RL PE=1 SV=2                                    | C1RL_HUMAN   | 53,497.50  | 28.70%  | 0 | 0 | 0  | 0.00%  |
| c(-)-Tiva1 | Disco-interacting protein 2 homolog C OS=Homo sapiens GN=DIP2C PE=2 SV=2                                      | DIP2C_HUMAN  | 170,766.90 | 0.00%   | 0 | 0 | 0  | 0.00%  |
| c(-)-Tiva1 | Probable ATP-dependent RNA helicase DDX5 OS=Homo sapiens GN=DDX5 PE=1 SV=1                                    | DDX5_HUMAN   | 69,149.70  | 94.60%  | 1 | 1 | 1  | 1.95%  |
| c(-)-Tiva1 | Protein AF-17 OS=Homo sapiens GN=MLLT6 PE=1 SV=2                                                              | AF17_HUMAN   | 112,076.80 | 98.10%  | 1 | 1 | 1  | 2.65%  |
| c(-)-Tiva1 | Lethal[3]malignant brain tumor-like protein 3 OS=Homo sapiens GN=L3MBTL3 PE=1 SV=2                            | LMBL3_HUMAN  | 88,336.70  | 0.00%   | 0 | 0 | 0  | 0.00%  |
| c(-)-Tiva1 | Tropomyosin alpha-4 chain OS=Homo sapiens GN=TPM4 PE=1 SV=3                                                   | TPM4_HUMAN   | 28,522.40  | 100.00% | 4 | 5 | 5  | 33.10% |
| c(-)-Tiva1 | Myosin-binding protein C, slow-type OS=Homo sapiens GN=MYBPC1 PE=1 SV=2                                       | MYPC1_HUMAN  | 128,297.90 | 0.00%   | 0 | 0 | 0  | 0.00%  |
| c(-)-Tiva1 | Protein spinster homolog 2 OS=Homo sapiens GN=SPNS2 PE=1 SV=2                                                 | SPNS2_HUMAN  | 58,045.00  | 0.00%   | 0 | 0 | 0  | 0.00%  |
| c(-)-Tiva1 | Bromodomain-containing protein 1 OS=Homo sapiens GN=BRD1 PE=1 SV=1                                            | BRD1_HUMAN   | 119,522.10 | 0.00%   | 0 | 0 | 0  | 0.00%  |
| c(-)-Tiva1 | Unconventional myosin-Va OS=Homo sapiens GN=MYO5A PE=1 SV=2                                                   | MYO5A_HUMAN  | 215,412.60 | 100.00% | 2 | 2 | 2  | 1.94%  |
| c(-)-Tiva1 | Extracellular matrix protein FRAS1 OS=Homo sapiens GN=FRAS1 PE=2 SV=1                                         | FRAS1_HUMAN  | 442,917.10 | 84.60%  | 0 | 0 | 0  | 0.00%  |
| c(-)-Tiva1 | Cytoplasmic FMRI-interacting protein 1 OS=Homo sapiens GN=CYFIP1 PE=1 SV=1                                    | CYF1P_HUMAN  | 145,186.70 | 0.00%   | 0 | 0 | 0  | 0.00%  |
| c(-)-Tiva1 | Laminin subunit beta-3 OS=Homo sapiens GN=LAMB3 PE=1 SV=1                                                     | LAMB3_HUMAN  | 129,571.00 | 97.70%  | 0 | 0 | 0  | 0.00%  |
| c(-)-Tiva1 | Caldesmon OS=Homo sapiens GN=CALD1 PE=1 SV=3                                                                  | CALD1_HUMAN  | 93,231.70  | 0.00%   | 0 | 0 | 0  | 0.00%  |
| c(-)-Tiva1 | Replication factor C subunit 1 OS=Homo sapiens GN=RFC1 PE=1 SV=4                                              | RFC1_HUMAN   | 128,260.40 | 0.00%   | 0 | 0 | 0  | 0.00%  |
| c(-)-Tiva1 | Microtubule-associated serine/threonine-protein kinase 1 OS=Homo sapiens GN=MAST1 PE=1 SV=2                   | MAST1_HUMAN  | 170,679.90 | 85.10%  | 1 | 1 | 1  | 1.27%  |
| c(-)-Tiva1 | Protein Wnt-5b OS=Homo sapiens GN=WNT5B PE=2 SV=2                                                             | WNT5B_HUMAN  | 40,322.70  | 99.90%  | 1 | 1 | 1  | 8.08%  |
| c(-)-Tiva1 | Zinc finger protein 282 OS=Homo sapiens GN=ZNF282 PE=1 SV=3                                                   | ZN282_HUMAN  | 74,295.40  | 0.00%   | 0 | 0 | 0  | 0.00%  |
| c(-)-Tiva1 | 28S ribosomal protein S27, mitochondrial OS=Homo sapiens GN=MRPS27 PE=1 SV=3                                  | RT27_HUMAN   | 47,612.70  | 0.00%   | 0 | 0 | 0  | 0.00%  |
| c(-)-Tiva1 | Brain-specific angiogenesis inhibitor 3 OS=Homo sapiens GN=BAI3 PE=1 SV=2                                     | BAI3_HUMAN   | 171,519.00 | 99.90%  | 1 | 1 | 1  | 1.38%  |
| c(-)-Tiva1 | Target of rapamycin complex 2 subunit MAPKAP1 OS=Homo sapiens GN=MAPKAP1 PE=1 SV=2                            | SIN1_HUMAN   | 59,124.10  | 99.10%  | 1 | 1 | 1  | 6.51%  |
| c(-)-Tiva1 | Putative uncharacterized protein C11orf80 OS=Homo sapiens GN=C11orf80 PE=2 SV=1                               | CK080_HUMAN  | 58,062.30  | 0.00%   | 0 | 0 | 0  | 0.00%  |
| c(-)-Tiva1 | Ras guanyl-releasing protein 3 OS=Homo sapiens GN=RASGRP3 PE=2 SV=1                                           | GRP3_HUMAN   | 78,333.50  | 0.00%   | 0 | 0 | 0  | 0.00%  |
| c(-)-Tiva1 | Inositol-pentakisphosphate 2-kinase OS=Homo sapiens GN=IPPK PE=1 SV=1                                         | IPPK_HUMAN   | 56,017.40  | 90.10%  | 1 | 1 | 1  | 5.70%  |
| c(-)-Tiva1 | CAS1 domain-containing protein 1 OS=Homo sapiens GN=CASD1 PE=2 SV=1                                           | CASD1_HUMAN  | 91,684.00  | 0.00%   | 0 | 0 | 0  | 0.00%  |
| c(-)-Tiva1 | Matrin-3 OS=Homo sapiens GN=MATR3 PE=1 SV=2                                                                   | MATR3_HUMAN  | 94,626.70  | 98.60%  | 1 | 1 | 1  | 2.13%  |
| c(-)-Tiva1 | Complement component 1 Q subcomponent-binding protein, mitochondrial OS=Homo sapiens GN=C1QBIP PE=1 SV=1      | C1QBIP_HUMAN | 31,362.60  | 0.00%   | 0 | 0 | 0  | 0.00%  |
| c(-)-Tiva1 | OTU domain-containing protein 7A OS=Homo sapiens GN=OTUD7A PE=1 SV=1                                          | OTU7A_HUMAN  | 100,677.90 | 95.90%  | 1 | 1 | 1  | 3.35%  |
| c(-)-Tiva1 | X-linked retinitis pigmentosa GTPase regulator OS=Homo sapiens GN=RPGR PE=1 SV=2                              | RPGR_HUMAN   | 113,388.40 | 99.10%  | 1 | 1 | 1  | 2.45%  |
| c(-)-Tiva1 | Histone deacetylase 1 OS=Homo sapiens GN=HDAC1 PE=1 SV=1                                                      | HDAC1_HUMAN  | 55,104.10  | 100.00% | 2 | 2 | 2  | 10.20% |
| c(-)-Tiva1 | Zinc finger protein 534 OS=Homo sapiens GN=ZNF534 PE=2 SV=1                                                   | ZN534_HUMAN  | 77,165.60  | 0.00%   | 0 | 0 | 0  | 0.00%  |
| c(-)-Tiva1 | CXADR-like membrane protein OS=Homo sapiens GN=CLMP PE=1 SV=1                                                 | CLMP_HUMAN   | 41,280.80  | 94.40%  | 1 | 1 | 1  | 5.90%  |
| c(-)-Tiva1 | Vitamin D3 receptor OS=Homo sapiens GN=VDR PE=1 SV=1                                                          | VDR_HUMAN    | 48,290.50  | 22.80%  | 0 | 0 | 0  | 0.00%  |
| c(-)-Tiva1 | Receptor-type tyrosine-protein phosphatase delta OS=Homo sapiens GN=PTPRD PE=1 SV=2                           | PTPRD_HUMAN  | 214,760.50 | 94.20%  | 1 | 1 | 1  | 0.79%  |
| c(-)-Tiva1 | Bifunctional ATP-dependent dihydroxyacetone kinase/FAD-AMP lyase (cyclizing) OS=Homo sapiens GN=DAK PE=1 SV=2 | DHAK_HUMAN   | 58,948.10  | 98.00%  | 1 | 1 | 1  | 5.74%  |
| c(-)-Tiva1 | AT-hook-containing transcription factor OS=Homo sapiens GN=AKNA PE=1 SV=2                                     | AKNA_HUMAN   | 155,139.80 | 0.00%   | 0 | 0 | 0  | 0.00%  |
| c(-)-Tiva1 | Mitochondrial tRNA-specific 2-thiouridylase 1 OS=Homo sapiens GN=TRMU PE=1 SV=2                               | MTU1_HUMAN   | 47,744.70  | 4.80%   | 0 | 0 | 0  | 0.00%  |
| c(-)-Tiva1 | Syntaxin-binding protein 5-like OS=Homo sapiens GN=STXB5L PE=2 SV=2                                           | STB5L_HUMAN  | 131,889.80 | 0.00%   | 0 | 0 | 0  | 0.00%  |
| c(-)-Tiva1 | Terminal uridylyltransferase 7 OS=Homo sapiens GN=ZCCHC6 PE=1 SV=1                                            | TUT7_HUMAN   | 171,234.10 | 87.50%  | 1 | 1 | 1  | 1.87%  |
| c(-)-Tiva1 | Tudor domain-containing protein 6 OS=Homo sapiens GN=TDRO6 PE=2 SV=2                                          | TDRO6_HUMAN  | 236,518.90 | 99.10%  | 1 | 1 | 1  | 0.62%  |
| c(-)-Tiva1 | Patinin-like phospholipase domain-containing protein 1 OS=Homo sapiens GN=PNLAI1 PE=2 SV=3                    | PLPL1_HUMAN  | 57,874.70  | 96.30%  | 1 | 1 | 1  | 5.26%  |
| c(-)-Tiva1 | PR domain zinc finger protein 16 OS=Homo sapiens GN=PRDM16 PE=1 SV=3                                          | PRD16_HUMAN  | 140,253.80 | 0.00%   | 0 | 0 | 0  | 0.00%  |
| c(-)-Tiva1 | Glycogen synthase kinase-3 beta OS=Homo sapiens GN=GSK3B PE=1 SV=2                                            | GSK3B_HUMAN  | 46,745.30  | 100.00% | 4 | 4 | 4  | 20.70% |
| c(-)-Tiva1 | Zinc finger protein 616 OS=Homo sapiens GN=ZNF616 PE=2 SV=2                                                   | ZN616_HUMAN  | 90,271.20  | 88.40%  | 1 | 1 | 1  | 1.66%  |
| c(-)-Tiva1 | Transketolase OS=Homo sapiens GN=TKT PE=1 SV=3                                                                | TKT_HUMAN    | 67,879.40  | 36.10%  | 0 | 0 | 0  | 0.00%  |
| c(-)-Tiva1 | Calcium uptake protein 1, mitochondrial OS=Homo sapiens GN=MICU1 PE=1 SV=1                                    | MICU1_HUMAN  | 54,353.00  | 0.00%   | 0 | 0 | 0  | 0.00%  |
| c(-)-Tiva1 | Zinc finger protein 643 OS=Homo sapiens GN=ZNF643 PE=2 SV=2                                                   | ZN643_HUMAN  | 61,481.40  | 0.00%   | 0 | 0 | 0  | 0.00%  |
| c(-)-Tiva1 | Chordin OS=Homo sapiens GN=CHRD PE=1 SV=2                                                                     | CHRD_HUMAN   | 102,030.50 | 0.00%   | 0 | 0 | 0  | 0.00%  |
| c(-)-Tiva1 | Transcriptional repressor p66-alpha OS=Homo sapiens GN=GATAD2A PE=1 SV=1                                      | P66A_HUMAN   | 68,062.80  | 100.00% | 1 | 1 | 1  | 5.37%  |
| c(-)-Tiva1 | Neurobeachin-like protein 1 OS=Homo sapiens GN=NBAL1 PE=2 SV=3                                                | NBEL1_HUMAN  | 307,244.80 | 0.00%   | 0 | 0 | 0  | 0.00%  |
| c(-)-Tiva1 | SH3 domain-containing protein 21 OS=Homo sapiens GN=SH3D21 PE=1 SV=2                                          | SH321_HUMAN  | 70,519.10  | 0.00%   | 0 | 0 | 0  | 0.00%  |
| c(-)-Tiva1 | Keratin, type II cytoskeletal 71 OS=Homo sapiens GN=KRT71 PE=1 SV=3                                           | K2C71_HUMAN  | 57,293.10  | 87.50%  | 1 | 1 | 1  | 2.29%  |
| c(-)-Tiva1 | ES1 protein homolog, mitochondrial OS=Homo sapiens GN=C21orf33 PE=1 SV=3                                      | ES1_HUMAN    | 28,169.60  | 99.90%  | 1 | 1 | 1  | 4.85%  |
| c(-)-Tiva1 | NlirIN OS=Homo sapiens GN=NLIRN PE=1 SV=1                                                                     | NBN_HUMAN    | 84,961.10  | 0.00%   | 0 | 0 | 0  | 0.00%  |
| c(-)-Tiva1 | Lipase maturation factor 1 OS=Homo sapiens GN=LMF1 PE=1 SV=1                                                  | LMF1_HUMAN   | 64,875.90  | 88.60%  | 1 | 1 | 1  | 3.70%  |
| c(-)-Tiva1 | Dual specificity protein phosphatase CDC14B OS=Homo sapiens GN=CDC14B PE=1 SV=1                               | CC14B_HUMAN  | 56,803.40  | 0.00%   | 0 | 0 | 0  | 0.00%  |
| c(-)-Tiva1 | UPF0606 protein KIAA1549 OS=Homo sapiens GN=KIAA1549 PE=1 SV=4                                                | K1549_HUMAN  | 210,755.80 | 97.10%  | 0 | 0 | 0  | 0.00%  |
| c(-)-Tiva1 | Collagen alpha-1(VII) chain OS=Homo sapiens GN=COL6A1 PE=1 SV=3                                               | CO6A1_HUMAN  | 108,531.00 | 0.00%   | 0 | 0 | 0  | 0.00%  |
| c(-)-Tiva1 | Constitutive coactivator of PPAR-gamma-like protein 1 OS=Homo sapiens GN=FAM120A PE=1 SV=2                    | F120A_HUMAN  | 121,889.10 | 99.90%  | 1 | 1 | 1  | 1.25%  |
| c(-)-Tiva1 | Septin-9 OS=Homo sapiens GN=SEPT9 PE=1 SV=2                                                                   | SEPT9_HUMAN  | 65,402.30  | 0.00%   | 0 | 0 | 0  | 0.00%  |
| c(-)-Tiva1 | Serine/threonine-protein kinase DCLK1 OS=Homo sapiens GN=DCLK1 PE=1 SV=2                                      | DCLK1_HUMAN  | 82,225.80  | 0.00%   | 0 | 0 | 0  | 0.00%  |
| c(-)-Tiva1 | Radial spoke head protein 4 homolog A OS=Homo sapiens GN=RSPH4A PE=1 SV=1                                     | RS4A_HUMAN   | 80,733.90  | 99.10%  | 1 | 1 | 2  | 2.51%  |
| c(-)-Tiva1 | Coiled-coil domain-containing protein 73 OS=Homo sapiens GN=CCDC73 PE=1 SV=2                                  | CCD73_HUMAN  | 124,157.50 | 99.90%  | 1 | 1 | 1  | 3.15%  |
| c(-)-Tiva1 | Solute carrier organic anion transporter family member 1A2 OS=Homo sapiens GN=SLC01A2 PE=2 SV=1               | SO1A2_HUMAN  | 74,148.60  | 99.10%  | 1 | 1 | 1  | 2.69%  |
| c(-)-Tiva1 | Putative uncharacterized protein FLJ35645 OS=Homo sapiens PE=1 SV=1                                           | YC005_HUMAN  | 25,165.00  | 99.10%  | 1 | 1 | 1  | 18.80% |
| c(-)-Tiva1 | Zinc finger protein 93 OS=Homo sapiens GN=ZNF93 PE=2 SV=4                                                     | ZNF93_HUMAN  | 70,971.50  | 0.00%   | 0 | 0 | 0  | 0.00%  |
| c(-)-Tiva1 | A disintegrin and metalloproteinase with thrombospondin motifs 9 OS=Homo sapiens GN=ADAMTS9 PE=2 SV=4         | ATS9_HUMAN   | 216,485.50 | 100.00% | 1 | 1 | 1  | 1.71%  |
| c(-)-Tiva1 | Myb-binding protein 1A OS=Homo sapiens GN=MYBBP1A PE=1 SV=2                                                   | MBB1A_HUMAN  | 148,858.30 | 95.20%  | 1 | 1 | 1  | 0.75%  |
| c(-)-Tiva1 | Myosin-4 OS=Homo sapiens GN=MYH4 PE=1 SV=2                                                                    | MYH4_HUMAN   | 223,076.60 | 92.70%  | 1 | 1 | 1  | 1.34%  |
| c(-)-Tiva1 | POTE ankryrin domain family member F OS=Homo sapiens GN=POTEF PE=1 SV=2                                       | POTEF_HUMAN  | 121,447.10 | 100.00% | 2 | 4 | 20 | 4.74%  |
| c(-)-Tiva1 | E3 ubiquitin-protein ligase TRIM37 OS=Homo sapiens GN=TRIM37 PE=1 SV=2                                        | TR137_HUMAN  | 107,906.50 | 0.00%   | 0 | 0 | 0  | 0.00%  |
| c(-)-Tiva1 | Histone-lysine N-methyltransferase ASH1L OS=Homo sapiens GN=ASH1L PE=1 SV=2                                   | ASH1L_HUMAN  | 332,795.50 | 0.00%   | 0 | 0 | 0  | 0.00%  |
| c(-)-Tiva1 | Protein FAM111B OS=Homo sapiens GN=FAM111B PE=2 SV=1                                                          | F111B_HUMAN  | 84,676.90  | 91.60%  | 1 | 1 | 1  | 3.41%  |
| c(-)-Tiva1 | Tectonin beta-propeller repeat-containing protein 2 OS=Homo sapiens GN=TECPR2 PE=1 SV=4                       | TCPR2_HUMAN  | 153,848.20 | 69.50%  | 0 | 0 | 0  | 0.00%  |
| c(-)-Tiva1 | Hyccin OS=Homo sapiens GN=FAM126A PE=1 SV=2                                                                   | HYCC1_HUMAN  | 57,626.00  | 0.00%   | 0 | 0 | 0  | 0.00%  |
| c(-)-Tiva1 | Uncharacterized protein C4orf21 OS=Homo sapiens GN=C4orf21 PE=1 SV=2                                          | CD021_HUMAN  | 119,349.00 | 24.30%  | 0 | 0 | 0  | 0.00%  |
| c(-)-Tiva1 | GREB1-like protein OS=Homo sapiens GN=GREB1L PE=2 SV=2                                                        | GRB1L_HUMAN  | 214,357.60 | 88.10%  | 1 | 1 | 1  | 1.04%  |
| c(-)-Tiva1 | Dihydropyrimidinase-related protein 1 OS=Homo sapiens GN=CRMP1 PE=1 SV=1                                      | DPYL1_HUMAN  | 62,184.70  | 0.00%   | 0 | 0 | 0  | 0.00%  |
| c(-)-Tiva1 | Laminin subunit beta-4 OS=Homo sapiens GN=LAMB4 PE=2 SV=1                                                     | LAMB4_HUMAN  | 193,538.00 | 55.50%  | 0 | 0 | 0  | 0.00%  |

|            |                                                                    |                 |              |      |      |             |            |         |     |     |     |        |
|------------|--------------------------------------------------------------------|-----------------|--------------|------|------|-------------|------------|---------|-----|-----|-----|--------|
| c(-)-Tiva1 | Microtubule-associated tumor suppressor candidate 2                | OS=Homo sapiens | GN=MTUS2     | PE=1 | SV=3 | MTUS2_HUMAN | 150,196.10 | 0.00%   | 0   | 0   | 0   | 0.00%  |
| c(-)-Tiva1 | Sodium/glucose cotransporter 2                                     | OS=Homo sapiens | GN=SLC5A2    | PE=1 | SV=1 | SCSA2_HUMAN | 72,897.90  | 0.00%   | 0   | 0   | 0   | 0.00%  |
| c(-)-Tiva1 | Obscurn                                                            | OS=Homo sapiens | GN=OBSCN     | PE=1 | SV=3 | OBSCN_HUMAN | 868,461.50 | 99.60%  | 1   | 1   | 1   | 0.35%  |
| c(-)-Tiva1 | Olfactory receptor 2K2                                             | OS=Homo sapiens | GN=OR2K2     | PE=2 | SV=2 | OR2K2_HUMAN | 38,475.50  | 30.20%  | 0   | 0   | 0   | 0.00%  |
| c(-)-Tiva1 | Spectrin alpha chain, brain                                        | OS=Homo sapiens | GN=SPTAN1    | PE=1 | SV=3 | SPTA2_HUMAN | 284,542.70 | 100.00% | 140 | 173 | 215 | 63.80% |
| c(-)-Tiva1 | Uncharacterized protein C3orf20                                    | OS=Homo sapiens | GN=C3orf20   | PE=1 | SV=2 | CCO20_HUMAN | 101,269.80 | 98.90%  | 1   | 1   | 1   | 3.76%  |
| c(-)-Tiva1 | Heterogeneous nuclear ribonucleoprotein M                          | OS=Homo sapiens | GN=HNRNPM    | PE=1 | SV=3 | HNRPM_HUMAN | 77,517.30  | 100.00% | 3   | 3   | 3   | 6.16%  |
| c(-)-Tiva1 | Uncharacterized protein C17orf102                                  | OS=Homo sapiens | GN=C17orf102 | PE=2 | SV=1 | CQ102_HUMAN | 17,761.30  | 0.00%   | 0   | 0   | 0   | 0.00%  |
| c(-)-Tiva1 | Alcohol dehydrogenase class 4 mu/sigma chain                       | OS=Homo sapiens | GN=ADH7      | PE=1 | SV=2 | ADH7_HUMAN  | 41,481.40  | 0.00%   | 0   | 0   | 0   | 0.00%  |
| c(-)-Tiva1 | Taste receptor type 2 member 39                                    | OS=Homo sapiens | GN=TAS2R39   | PE=2 | SV=3 | T2R39_HUMAN | 38,628.80  | 95.90%  | 1   | 1   | 1   | 7.69%  |
| c(-)-Tiva1 | Multidrug resistance-associated protein 1                          | OS=Homo sapiens | GN=ABCC1     | PE=1 | SV=3 | MRP1_HUMAN  | 171,595.50 | 99.40%  | 1   | 1   | 1   | 1.57%  |
| c(-)-Tiva1 | Signal-induced proliferation-associated 1-like protein 3           | OS=Homo sapiens | GN=SIPA1L3   | PE=1 | SV=3 | SI1L3_HUMAN | 194,612.50 | 97.20%  | 0   | 0   | 0   | 0.00%  |
| c(-)-Tiva1 | Prostaglandin reductase 1                                          | OS=Homo sapiens | GN=PTGR1     | PE=1 | SV=2 | PTGR1_HUMAN | 35,870.50  | 99.20%  | 1   | 1   | 1   | 5.78%  |
| c(-)-Tiva1 | Carbonic anhydrase 1                                               | OS=Homo sapiens | GN=CA1       | PE=1 | SV=2 | CAH1_HUMAN  | 28,870.40  | 0.00%   | 0   | 0   | 0   | 0.00%  |
| c(-)-Tiva1 | TATA-binding protein-associated factor 172                         | OS=Homo sapiens | GN=BTAF1     | PE=1 | SV=2 | BTAF1_HUMAN | 206,889.90 | 93.00%  | 1   | 1   | 1   | 1.68%  |
| c(-)-Tiva1 | Zinc finger protein 283                                            | OS=Homo sapiens | GN=ZNF283    | PE=2 | SV=4 | ZN283_HUMAN | 77,941.90  | 86.60%  | 1   | 1   | 1   | 4.12%  |
| c(-)-Tiva1 | Zinc finger protein 624                                            | OS=Homo sapiens | GN=ZNF624    | PE=2 | SV=3 | ZN624_HUMAN | 99,928.90  | 0.00%   | 0   | 0   | 0   | 0.00%  |
| c(-)-Tiva1 | Coenzyme Q-binding protein COQ10 homolog A, mitochondrial          | OS=Homo sapiens | GN=COQ10A    | PE=2 | SV=2 | CQ10A_HUMAN | 27,686.30  | 0.00%   | 0   | 0   | 0   | 0.00%  |
| c(-)-Tiva1 | Protein sprouty homolog 3                                          | OS=Homo sapiens | GN=SPRY3     | PE=1 | SV=2 | SPY3_HUMAN  | 31,221.30  | 0.00%   | 0   | 0   | 0   | 0.00%  |
| c(-)-Tiva1 | Keratin, type I cytoskeletal 14                                    | OS=Homo sapiens | GN=KRT14     | PE=1 | SV=4 | K1C14_HUMAN | 51,562.50  | 0.00%   | 0   | 0   | 0   | 0.00%  |
| c(-)-Tiva1 | PRAME family member 22                                             | OS=Homo sapiens | GN=PRAMEF22  | PE=2 | SV=3 | PRAZ2_HUMAN | 55,491.00  | 100.00% | 2   | 2   | 2   | 13.10% |
| c(-)-Tiva1 | Calsynenin-2                                                       | OS=Homo sapiens | GN=CLSTN2    | PE=1 | SV=2 | CSTN2_HUMAN | 107,005.60 | 0.00%   | 0   | 0   | 0   | 0.00%  |
| c(-)-Tiva1 | Zinc finger matrix-type protein 2                                  | OS=Homo sapiens | GN=ZMAT2     | PE=1 | SV=1 | ZMAT2_HUMAN | 23,612.50  | 93.90%  | 1   | 1   | 1   | 13.10% |
| c(-)-Tiva1 | Ribosomal protein S6 kinase alpha-3                                | OS=Homo sapiens | GN=RP56K3    | PE=1 | SV=1 | KS6A3_HUMAN | 83,738.50  | 83.90%  | 1   | 1   | 1   | 2.70%  |
| c(-)-Tiva1 | Beta-defensin 118                                                  | OS=Homo sapiens | GN=DEFB118   | PE=2 | SV=1 | DB118_HUMAN | 13,613.70  | 0.00%   | 0   | 0   | 0   | 0.00%  |
| c(-)-Tiva1 | Tuftelin-interacting protein 11                                    | OS=Homo sapiens | GN=TFIP11    | PE=1 | SV=1 | TFP11_HUMAN | 96,821.90  | 99.10%  | 1   | 1   | 1   | 3.11%  |
| c(-)-Tiva1 | Retinal-specific ATP-binding cassette transporter                  | OS=Homo sapiens | GN=ABCA4     | PE=1 | SV=3 | ABCA4_HUMAN | 255,950.70 | 99.60%  | 1   | 1   | 1   | 1.58%  |
| c(-)-Tiva1 | Protein-methionine sulfoxide oxidase MICAL3                        | OS=Homo sapiens | GN=MICAL3    | PE=1 | SV=2 | MICA3_HUMAN | 224,299.40 | 95.10%  | 1   | 1   | 1   | 1.00%  |
| c(-)-Tiva1 | CREB3 regulatory factor                                            | OS=Homo sapiens | GN=CREBRF    | PE=1 | SV=2 | CRERF_HUMAN | 72,150.00  | 0.00%   | 0   | 0   | 0   | 0.00%  |
| c(-)-Tiva1 | Heat shock 70 kDa protein 1A/1B                                    | OS=Homo sapiens | GN=HSPA1A    | PE=1 | SV=5 | HSP71_HUMAN | 70,054.00  | 29.90%  | 0   | 0   | 0   | 0.00%  |
| c(-)-Tiva1 | Nuclear pore complex protein Nup50                                 | OS=Homo sapiens | GN=NUP50     | PE=1 | SV=2 | NUP50_HUMAN | 50,145.00  | 84.30%  | 1   | 1   | 1   | 7.48%  |
| c(-)-Tiva1 | C-type lectin domain family 2 member A                             | OS=Homo sapiens | GN=CLEC2A    | PE=1 | SV=2 | CLC2A_HUMAN | 19,973.20  | 99.10%  | 1   | 1   | 1   | 13.80% |
| c(-)-Tiva1 | Cytochrome P450 1B1                                                | OS=Homo sapiens | GN=CYP1B1    | PE=1 | SV=2 | CP1B1_HUMAN | 60,846.40  | 98.40%  | 1   | 1   | 1   | 6.45%  |
| c(-)-Tiva1 | Probable RNA-binding protein 20                                    | OS=Homo sapiens | GN=RBM20     | PE=1 | SV=3 | RBM20_HUMAN | 134,358.00 | 99.10%  | 1   | 1   | 1   | 1.22%  |
| c(-)-Tiva1 | Sodium-dependent phosphate transporter 1                           | OS=Homo sapiens | GN=SLC20A1   | PE=1 | SV=1 | S20A1_HUMAN | 73,700.90  | 0.00%   | 0   | 0   | 0   | 0.00%  |
| c(-)-Tiva1 | Interleukin enhancer-binding factor 3                              | OS=Homo sapiens | GN=ILF3      | PE=1 | SV=3 | ILF3_HUMAN  | 95,338.90  | 91.20%  | 1   | 1   | 1   | 2.01%  |
| c(-)-Tiva1 | 26S proteasome non-ATPase regulatory subunit 2                     | OS=Homo sapiens | GN=PSMD2     | PE=1 | SV=3 | PSMD2_HUMAN | 100,202.20 | 0.00%   | 0   | 0   | 0   | 0.00%  |
| c(-)-Tiva1 | Histone-lysine N-methyltransferase MLL4                            | OS=Homo sapiens | GN=WWBP7     | PE=1 | SV=1 | MLL4_HUMAN  | 293,512.20 | 99.10%  | 1   | 1   | 1   | 0.70%  |
| c(-)-Tiva1 | Zeta-sarcoglycan                                                   | OS=Homo sapiens | GN=SGCZ      | PE=2 | SV=1 | SGCZ_HUMAN  | 32,949.10  | 0.00%   | 0   | 0   | 0   | 0.00%  |
| c(-)-Tiva1 | Phosphatidylinositol 5-phosphate 4-kinase type-2 beta              | OS=Homo sapiens | GN=PIP4K2B   | PE=1 | SV=1 | PI42B_HUMAN | 47,378.50  | 0.00%   | 0   | 0   | 0   | 0.00%  |
| c(-)-Tiva1 | Neurobeachin-like protein 2                                        | OS=Homo sapiens | GN=NBAL2     | PE=1 | SV=2 | NBEL2_HUMAN | 302,517.90 | 0.00%   | 0   | 0   | 0   | 0.00%  |
| c(-)-Tiva1 | Protocadherin-16                                                   | OS=Homo sapiens | GN=DCHS1     | PE=2 | SV=1 | PCD16_HUMAN | 346,178.80 | 99.10%  | 1   | 1   | 1   | 0.46%  |
| c(-)-Tiva1 | UPF0415 protein C7orf25                                            | OS=Homo sapiens | GN=C7orf25   | PE=1 | SV=1 | CG025_HUMAN | 46,451.30  | 0.00%   | 0   | 0   | 0   | 0.00%  |
| c(-)-Tiva1 | Enkurin                                                            | OS=Homo sapiens | GN=ENKUR     | PE=2 | SV=1 | ENKUR_HUMAN | 29,455.60  | 0.00%   | 0   | 0   | 0   | 0.00%  |
| c(-)-Tiva1 | Vacuolar protein sorting-associated protein 37D                    | OS=Homo sapiens | GN=VP37D     | PE=1 | SV=2 | VP37D_HUMAN | 27,730.80  | 93.20%  | 1   | 1   | 1   | 12.40% |
| c(-)-Tiva1 | C2 domain-containing protein 2                                     | OS=Homo sapiens | GN=C2CD2     | PE=1 | SV=2 | CU025_HUMAN | 75,533.50  | 76.00%  | 0   | 0   | 0   | 0.00%  |
| c(-)-Tiva1 | Centriolin                                                         | OS=Homo sapiens | GN=CNTRL     | PE=1 | SV=2 | CNTRL_HUMAN | 268,891.50 | 0.00%   | 0   | 0   | 0   | 0.00%  |
| c(-)-Tiva1 | Olfactory receptor 6C75                                            | OS=Homo sapiens | GN=OR6C75    | PE=2 | SV=1 | O6C75_HUMAN | 35,373.90  | 47.00%  | 0   | 0   | 0   | 0.00%  |
| c(-)-Tiva1 | Beta-actin-like protein 2                                          | OS=Homo sapiens | GN=ACTBL2    | PE=1 | SV=2 | ACTBL_HUMAN | 42,004.20  | 100.00% | 4   | 5   | 25  | 21.50% |
| c(-)-Tiva1 | Uridine diphosphate glucose pyrophosphatase                        | OS=Homo sapiens | GN=NUDT14    | PE=1 | SV=2 | NUD14_HUMAN | 24,117.90  | 69.60%  | 0   | 0   | 0   | 0.00%  |
| c(-)-Tiva1 | Inactive dual specificity phosphatase 27                           | OS=Homo sapiens | GN=DUSP27    | PE=2 | SV=1 | DUS27_HUMAN | 130,177.60 | 98.90%  | 0   | 0   | 0   | 0.00%  |
| c(-)-Tiva1 | Polycystic kidney disease protein 1-like 1                         | OS=Homo sapiens | GN=PKD1L1    | PE=2 | SV=1 | PK1L1_HUMAN | 315,434.70 | 0.00%   | 0   | 0   | 0   | 0.00%  |
| c(-)-Tiva1 | Rho GTPase-activating protein 23                                   | OS=Homo sapiens | GN=ARHGAP23  | PE=1 | SV=2 | RHG23_HUMAN | 162,196.70 | 66.80%  | 0   | 0   | 0   | 0.00%  |
| c(-)-Tiva1 | Exophilin-5                                                        | OS=Homo sapiens | GN=EXPH5     | PE=1 | SV=3 | EXPH5_HUMAN | 222,521.30 | 99.60%  | 1   | 1   | 1   | 1.81%  |
| c(-)-Tiva1 | WD repeat-containing protein 11                                    | OS=Homo sapiens | GN=WDR11     | PE=1 | SV=1 | WDR11_HUMAN | 136,688.10 | 88.70%  | 1   | 1   | 1   | 2.94%  |
| c(-)-Tiva1 | Poly[ADP-ribose] polymerase 14                                     | OS=Homo sapiens | GN=PARP14    | PE=1 | SV=3 | PAR14_HUMAN | 202,802.30 | 82.20%  | 0   | 0   | 0   | 0.00%  |
| c(-)-Tiva1 | Plectrin homology domain-containing family G member 6              | OS=Homo sapiens | GN=PLEKHG6   | PE=1 | SV=3 | PKHG6_HUMAN | 88,962.00  | 51.70%  | 0   | 0   | 0   | 0.00%  |
| c(-)-Tiva1 | Uncharacterized protein C1orf173                                   | OS=Homo sapiens | GN=C1orf173  | PE=2 | SV=1 | CA173_HUMAN | 168,465.90 | 0.00%   | 0   | 0   | 0   | 0.00%  |
| c(-)-Tiva1 | Dnal homolog subfamily C member 2                                  | OS=Homo sapiens | GN=DNAJC2    | PE=1 | SV=4 | DNJC2_HUMAN | 71,997.90  | 78.80%  | 0   | 0   | 0   | 0.00%  |
| c(-)-Tiva1 | Semaphorin-3B                                                      | OS=Homo sapiens | GN=SEMA3B    | PE=2 | SV=1 | SEM3B_HUMAN | 83,121.50  | 0.00%   | 0   | 0   | 0   | 0.00%  |
| c(-)-Tiva1 | Eukaryotic translation initiation factor 3 subunit D               | OS=Homo sapiens | GN=EIF3D     | PE=1 | SV=1 | EIF3D_HUMAN | 63,973.80  | 49.70%  | 0   | 0   | 0   | 0.00%  |
| c(-)-Tiva1 | SLIT-ROBO Rho GTPase-activating protein 1                          | OS=Homo sapiens | GN=SRGAP1    | PE=1 | SV=1 | SRGP1_HUMAN | 124,267.60 | 80.30%  | 0   | 0   | 0   | 0.00%  |
| c(-)-Tiva1 | Sarcoma antigen 1                                                  | OS=Homo sapiens | GN=SAGE1     | PE=2 | SV=2 | SAGE1_HUMAN | 99,224.50  | 99.10%  | 1   | 1   | 1   | 2.65%  |
| c(-)-Tiva1 | Coronin-1C                                                         | OS=Homo sapiens | GN=CORO1C    | PE=1 | SV=1 | COR1C_HUMAN | 53,250.30  | 100.00% | 11  | 11  | 12  | 32.70% |
| c(-)-Tiva1 | Transforming protein RhoA                                          | OS=Homo sapiens | GN=RHOA      | PE=1 | SV=1 | RHOA_HUMAN  | 21,768.40  | 100.00% | 1   | 1   | 1   | 8.81%  |
| c(-)-Tiva1 | Transcription initiation factor TFIID subunit 3                    | OS=Homo sapiens | GN=TAIF3     | PE=1 | SV=1 | TAIF3_HUMAN | 103,584.30 | 99.90%  | 1   | 1   | 1   | 1.94%  |
| c(-)-Tiva1 | Unconventional myosin-1a                                           | OS=Homo sapiens | GN=MYO1A     | PE=1 | SV=1 | MYO1A_HUMAN | 118,404.40 | 100.00% | 3   | 3   | 3   | 3.64%  |
| c(-)-Tiva1 | Coiled-coil domain-containing protein 110                          | OS=Homo sapiens | GN=CCDC110   | PE=2 | SV=1 | CC110_HUMAN | 96,728.80  | 0.00%   | 0   | 0   | 0   | 0.00%  |
| c(-)-Tiva1 | Proactivator polypeptide-like 1                                    | OS=Homo sapiens | GN=PSAPL1    | PE=2 | SV=2 | SAPL1_HUMAN | 56,626.00  | 46.80%  | 0   | 0   | 0   | 0.00%  |
| c(-)-Tiva1 | Putative pre-mRNA-splicing factor ATP-dependent RNA helicase DHX15 | OS=Homo sapiens | GN=DHX15     | PE=1 | SV=2 | DHX15_HUMAN | 90,935.20  | 100.00% | 2   | 2   | 2   | 3.27%  |
| c(-)-Tiva1 | IQ domain-containing protein F3                                    | OS=Homo sapiens | GN=IQCF3     | PE=2 | SV=1 | IQCF3_HUMAN | 18,250.40  | 0.00%   | 0   | 0   | 0   | 0.00%  |
| c(-)-Tiva1 | Muscle, skeletal receptor tyrosine-protein kinase                  | OS=Homo sapiens | GN=MUSK      | PE=1 | SV=1 | MUSK_HUMAN  | 97,057.80  | 0.00%   | 0   | 0   | 0   | 0.00%  |
| c(-)-Tiva1 | 39S ribosomal protein L1, mitochondrial                            | OS=Homo sapiens | GN=MRPL1     | PE=1 | SV=2 | RM01_HUMAN  | 36,910.00  | 89.70%  | 1   | 1   | 1   | 7.38%  |
| c(-)-Tiva1 | Oxysterol-binding protein-related protein 7                        | OS=Homo sapiens | GN=OSBPL7    | PE=2 | SV=1 | OSB7_HUMAN  | 95,432.50  | 0.00%   | 0   | 0   | 0   | 0.00%  |
| c(-)-Tiva1 | Bromodomain and WD repeat-containing protein 1                     | OS=Homo sapiens | GN=BRWD1     | PE=1 | SV=4 | BRWD1_HUMAN | 262,940.10 | 87.50%  | 1   | 1   | 1   | 0.73%  |
| c(-)-Tiva1 | Sulfotransferase 4A1                                               | OS=Homo sapiens | GN=SULT4A1   | PE=1 | SV=2 | ST4A1_HUMAN | 33,085.20  | 96.90%  | 1   | 1   | 1   | 5.63%  |
| c(-)-Tiva1 | Regulator of G-protein signaling 12                                | OS=Homo sapiens | GN=RGSI2     | PE=1 | SV=1 | RGSI2_HUMAN | 156,359.40 | 47.80%  | 0   | 0   | 0   | 0.00%  |
| c(-)-Tiva1 | CDK5 regulatory subunit-associated protein 2                       | OS=Homo sapiens | GN=CDK5RAP2  | PE=1 | SV=5 | CKSP2_HUMAN | 215,041.80 | 0.00%   | 0   | 0   | 0   | 0.00%  |
| c(-)-Tiva1 | Junction plakoglobin                                               | OS=Homo sapiens | GN=JUP       | PE=1 | SV=3 | PLAK_HUMAN  | 81,745.90  | 52.40%  | 0   | 0   | 0   | 0.00%  |
| c(-)-Tiva1 | Cytokine receptor-like factor 1                                    | OS=Homo sapiens | GN=CRFL1     | PE=1 | SV=1 | CRFL1_HUMAN | 46,302.20  | 99.10%  | 1   | 1   | 1   | 4.98%  |
| c(-)-Tiva1 | Golgin subfamily A member 3                                        | OS=Homo sapiens | GN=GOLGA3    | PE=1 | SV=2 | GOGA3_HUMAN | 167,356.00 | 0.00%   | 0   | 0   | 0   | 0.00%  |
| c(-)-Tiva1 | Very long-chain specific acyl-CoA dehydrogenase, mitochondrial     | OS=Homo sapiens | GN=ACADVL    | PE=1 | SV=1 | ACADV_HUMAN | 70,391.60  | 0.00%   | 0   | 0   | 0   | 0.00%  |
| c(-)-Tiva1 | Cadherin-23                                                        | OS=Homo sapiens | GN=CDH23     | PE=1 | SV=1 | CAD23_HUMAN | 369,523.40 | 0.00%   | 0   | 0   | 0   | 0.00%  |
| c(-)-Tiva1 | WD repeat-containing protein 47                                    | OS=Homo sapiens | GN=WDR47     | PE=1 | SV=1 | WDR47_HUMAN | 101,950.50 | 99.00%  | 1   | 1   | 1   | 1.09%  |
| c(-)-Tiva1 | Plexin-A2                                                          | OS=Homo sapiens | GN=PLXNA2    | PE=1 | SV=4 | PLXA2_HUMAN | 211,105.50 | 0.00%   | 0   | 0   | 0   | 0.00%  |
| c(-)-Tiva1 | Olfactory receptor 13C3                                            | OS=Homo sapiens | GN=OR13C3    | PE=2 | SV=2 | O13C3_HUMAN | 38,731.80  | 0.00%   | 0   | 0   | 0   | 0.00%  |
| c(-)-Tiva1 | SUMO-conjugating enzyme UBC9                                       | OS=Homo sapiens | GN=UBE2I     | PE=1 | SV=1 | UBC9_HUMAN  | 18,007.50  | 83.50%  | 1   | 1   | 1   | 17.70% |
| c(-)-Tiva1 | Crumbs homolog 1                                                   | OS=Homo sapiens | GN=CRB1      | PE=1 | SV=2 | CRUM1_HUMAN | 154,182.20 | 99.10%  | 1   | 1   | 1   | 1.92%  |
| c(-)-Tiva1 | Oxysterol-binding protein-related protein 10                       | OS=Homo sapiens | GN=OSBPL10   | PE=1 | SV=2 | OSB10_HUMAN | 83,970.50  | 0.00%   | 0   | 0   | 0   | 0.00%  |
| c(-)-Tiva1 | T-complex protein 1 subunit gamma                                  | OS=Homo sapiens | GN=CCT3      | PE=1 | SV=4 | TCGP_HUMAN  | 60,535.40  | 87.00%  | 1   | 1   | 1   | 2.94%  |
| c(-)-Tiva1 | Coiled-coil domain-containing protein 18                           | OS=Homo sapiens | GN=CCDC18    | PE=1 | SV=1 | CCD18_HUMAN | 168,966.50 | 96.50%  | 1   | 1   | 1   | 1.58%  |
| c(-)-Tiva1 | Latrophilin-1                                                      | OS=Homo sapiens | GN=LPHN1     | PE=1 | SV=1 | LPHN1_HUMAN | 162,719.00 | 99.10%  | 1   | 1   | 1   | 2.51%  |
| c(-)-Tiva1 | Voltage-dependent T-type calcium channel subunit alpha-1H          | OS=Homo sapiens | GN=CACNA1H   | PE=1 | SV=4 | CAC1H_HUMAN | 259,165.10 | 0.00%   | 0   | 0   | 0   | 0.00%  |
| c(-)-Tiva1 | NFX1-type zinc finger-containing protein 1                         | OS=Homo sapiens | GN=ZNFX1     | PE=1 | SV=2 | ZNFX1_HUMAN | 220,225.40 | 99.10%  | 1   | 1   | 1   | 1.72%  |
| c(-)-Tiva1 | Putative ATP-dependent RNA helicase DHX30                          | OS=Homo sapiens | GN=DHX30     | PE=1 | SV=1 | DHX30_HUMAN | 133,941.60 | 100.00% | 2   | 2   | 2   | 4.69%  |
| c(-)-Tiva1 | Amiloride-sensitive sodium channel subunit delta                   | OS=Homo sapiens | GN=SCNN1D    | PE=1 | SV=2 | SCNND_HUMAN | 70,214.60  | 0.00%   | 0   | 0   | 0   | 0.00%  |
| c(-)-Tiva1 | Zinc finger protein 366                                            | OS=Homo sapiens | GN=ZNF366    | PE=1 | SV=1 |             |            |         |     |     |     |        |



|            |                                                                       |                                       |              |            |         |     |     |     |        |
|------------|-----------------------------------------------------------------------|---------------------------------------|--------------|------------|---------|-----|-----|-----|--------|
| c(-)-Tiva1 | Neural retina-specific leucine zipper protein                         | OS=Homo sapiens GN=NRL PE=1 SV=1      | NRL_HUMAN    | 25,940.80  | 92.90%  | 1   | 1   | 1   | 6.75%  |
| c(-)-Tiva1 | Putative polypeptide N-acetylgalactosaminyltransferase-like protein 3 | OS=Homo sapiens GN=WBSCR17 PE=2 SV=2  | GLTL3_HUMAN  | 67,753.20  | 0.00%   | 0   | 0   | 0   | 0.00%  |
| c(-)-Tiva1 | PH-interacting protein                                                | OS=Homo sapiens GN=PHIP PE=1 SV=1     | PHIP_HUMAN   | 206,692.20 | 95.40%  | 1   | 1   | 1   | 0.93%  |
| c(-)-Tiva1 | Retinoblastoma-binding protein 5                                      | OS=Homo sapiens GN=RBBP5 PE=1 SV=2    | RBBP5_HUMAN  | 59,153.60  | 0.00%   | 0   | 0   | 0   | 0.00%  |
| c(-)-Tiva1 | Prolyl 4-hydroxylase subunit alpha-3                                  | OS=Homo sapiens GN=P4HA3 PE=1 SV=1    | P4HA3_HUMAN  | 61,127.80  | 0.00%   | 0   | 0   | 0   | 0.00%  |
| c(-)-Tiva1 | Uncharacterized protein KIAA1671                                      | OS=Homo sapiens GN=KIAA1671 PE=1 SV=2 | K1671_HUMAN  | 196,711.40 | 100.00% | 1   | 1   | 1   | 1.94%  |
| c(-)-Tiva1 | Complement C2                                                         | OS=Homo sapiens GN=C2 PE=1 SV=2       | CO2_HUMAN    | 83,268.80  | 96.60%  | 1   | 1   | 1   | 2.79%  |
| c(-)-Tiva1 | Microspherule protein 1                                               | OS=Homo sapiens GN=MCRS1 PE=1 SV=1    | MCRS1_HUMAN  | 51,805.20  | 0.00%   | 0   | 0   | 0   | 0.00%  |
| c(-)-Tiva1 | Glutamine-tRNA ligase                                                 | OS=Homo sapiens GN=QARS PE=1 SV=1     | SYQ_HUMAN    | 87,799.90  | 0.00%   | 0   | 0   | 0   | 0.00%  |
| c(-)-Tiva1 | Ras GTPase-activating protein nGAP                                    | OS=Homo sapiens GN=RASAL2 PE=1 SV=2   | NGAP_HUMAN   | 128,560.60 | 0.00%   | 0   | 0   | 0   | 0.00%  |
| c(-)-Tiva1 | SET and MYND domain-containing protein 4                              | OS=Homo sapiens GN=SMYD4 PE=2 SV=3    | SMYD4_HUMAN  | 89,225.80  | 29.10%  | 0   | 0   | 0   | 0.00%  |
| c(-)-Tiva1 | ELAV-like protein 3                                                   | OS=Homo sapiens GN=ELAVL3 PE=1 SV=3   | ELAV3_HUMAN  | 39,548.50  | 89.80%  | 1   | 1   | 1   | 9.54%  |
| c(-)-Tiva1 | Zinc finger and SCAN domain-containing protein 30                     | OS=Homo sapiens GN=ZSCAN30 PE=1 SV=1  | ZSC30_HUMAN  | 56,363.80  | 0.00%   | 0   | 0   | 0   | 0.00%  |
| c(-)-Tiva1 | Kinesin-like protein KIF23                                            | OS=Homo sapiens GN=KIF23 PE=1 SV=3    | KIF23_HUMAN  | 110,059.40 | 32.10%  | 0   | 0   | 0   | 0.00%  |
| c(-)-Tiva1 | Gem-associated protein 5                                              | OS=Homo sapiens GN=GEMIN5 PE=1 SV=3   | GEMIS_HUMAN  | 168,590.80 | 95.70%  | 1   | 1   | 1   | 0.93%  |
| c(-)-Tiva1 | Protein FAM83C                                                        | OS=Homo sapiens GN=FAM83C PE=1 SV=3   | FA83C_HUMAN  | 81,079.70  | 100.00% | 1   | 1   | 1   | 2.95%  |
| c(-)-Tiva1 | Perforin-1                                                            | OS=Homo sapiens GN=PRF1 PE=1 SV=1     | PERF_HUMAN   | 61,376.90  | 99.10%  | 1   | 1   | 1   | 5.59%  |
| c(-)-Tiva1 | GTP-binding protein Rhes                                              | OS=Homo sapiens GN=RASD2 PE=1 SV=1    | RHES_HUMAN   | 30,366.50  | 99.10%  | 1   | 1   | 1   | 7.89%  |
| c(-)-Tiva1 | Mdm2-binding protein                                                  | OS=Homo sapiens GN=MTBP PE=1 SV=1     | MTBP_HUMAN   | 102,196.80 | 0.00%   | 0   | 0   | 0   | 0.00%  |
| c(-)-Tiva1 | Islet cell autoantigen 1-like protein                                 | OS=Homo sapiens GN=ICAIL1 PE=2 SV=1   | ICAIL1_HUMAN | 54,407.90  | 94.80%  | 1   | 1   | 2   | 5.19%  |
| c(-)-Tiva1 | Transmembrane protein 5                                               | OS=Homo sapiens GN=TMEM5 PE=2 SV=1    | TMEM5_HUMAN  | 51,147.00  | 94.30%  | 1   | 1   | 1   | 3.61%  |
| c(-)-Tiva1 | Putative unconventional myosin-XVB                                    | OS=Homo sapiens GN=MYO15B PE=5 SV=2   | MY15B_HUMAN  | 167,118.90 | 0.00%   | 0   | 0   | 0   | 0.00%  |
| c(-)-Tiva1 | Forkhead box protein L1                                               | OS=Homo sapiens GN=FOXL1 PE=2 SV=2    | FOXL1_HUMAN  | 36,491.90  | 0.00%   | 0   | 0   | 0   | 0.00%  |
| c(-)-Tiva1 | Puromycin-sensitive aminopeptidase-like protein                       | OS=Homo sapiens GN=NPEPPSL1 PE=2 SV=3 | PSAL_HUMAN   | 53,748.30  | 0.00%   | 0   | 0   | 0   | 0.00%  |
| c(-)-Tiva1 | Propionyl-CoA carboxylase alpha chain, mitochondrial                  | OS=Homo sapiens GN=PCCA PE=1 SV=4     | PCCA_HUMAN   | 80,059.30  | 54.80%  | 0   | 0   | 0   | 0.00%  |
| c(-)-Tiva1 | Zinc finger protein 286A                                              | OS=Homo sapiens GN=ZNF286A PE=2 SV=1  | Z286A_HUMAN  | 60,173.80  | 93.30%  | 1   | 1   | 1   | 4.22%  |
| c(-)-Tiva1 | Collagen alpha-6(VI) chain                                            | OS=Homo sapiens GN=COL6A6 PE=1 SV=2   | CO6A6_HUMAN  | 247,177.50 | 99.20%  | 1   | 1   | 1   | 0.97%  |
| c(-)-Tiva1 | Septin-11                                                             | OS=Homo sapiens GN=SEPT11 PE=1 SV=3   | SEP11_HUMAN  | 49,399.10  | 89.80%  | 1   | 1   | 1   | 2.56%  |
| c(-)-Tiva1 | Protein phosphatase 1 regulatory subunit 12A                          | OS=Homo sapiens GN=PPP1R12A PE=1 SV=1 | MYPT1_HUMAN  | 115,283.40 | 0.00%   | 0   | 0   | 0   | 0.00%  |
| c(-)-Tiva1 | Engulfment and cell motility protein 3                                | OS=Homo sapiens GN=ELMO3 PE=1 SV=3    | ELMO3_HUMAN  | 81,469.90  | 0.00%   | 0   | 0   | 0   | 0.00%  |
| c(-)-Tiva1 | FRAS1-related extracellular matrix protein 2                          | OS=Homo sapiens GN=FREM2 PE=1 SV=2    | FREM2_HUMAN  | 351,154.80 | 0.00%   | 0   | 0   | 0   | 0.00%  |
| c(-)-Tiva1 | Protein Wnt-2b                                                        | OS=Homo sapiens GN=WNT2B PE=1 SV=2    | WNT2B_HUMAN  | 43,769.50  | 0.00%   | 0   | 0   | 0   | 0.00%  |
| c(-)-Tiva1 | Transgelin-2                                                          | OS=Homo sapiens GN=TAGLN2 PE=1 SV=3   | TAGL2_HUMAN  | 22,391.90  | 0.00%   | 0   | 0   | 0   | 0.00%  |
| c(-)-Tiva1 | Regulatory-associated protein of mTOR                                 | OS=Homo sapiens GN=RPTOR PE=1 SV=1    | RPTOR_HUMAN  | 149,039.20 | 100.00% | 2   | 2   | 2   | 3.75%  |
| c(-)-Tiva1 | Myosin-9                                                              | OS=Homo sapiens GN=MYH9 PE=1 SV=4     | MYH9_HUMAN   | 226,537.50 | 100.00% | 116 | 159 | 218 | 57.30% |
| c(-)-Tiva1 | Endophilin-A3                                                         | OS=Homo sapiens GN=SH3GL3 PE=1 SV=1   | SH3G3_HUMAN  | 39,285.70  | 0.00%   | 0   | 0   | 0   | 0.00%  |
| c(-)-Tiva1 | Methyl-CpG-binding domain protein 1                                   | OS=Homo sapiens GN=MBD1 PE=1 SV=2     | MBD1_HUMAN   | 66,606.70  | 71.70%  | 0   | 0   | 0   | 0.00%  |
| c(-)-Tiva1 | 60S ribosomal protein L23                                             | OS=Homo sapiens GN=RPL23 PE=1 SV=1    | RL23_HUMAN   | 14,865.90  | 99.10%  | 1   | 1   | 1   | 10.70% |
| c(-)-Tiva1 | Probable E3 ubiquitin-protein ligase C12orf51                         | OS=Homo sapiens GN=C12orf51 PE=1 SV=5 | K0614_HUMAN  | 439,345.20 | 38.90%  | 0   | 0   | 0   | 0.00%  |
| c(-)-Tiva1 | Olfactory receptor 2T34                                               | OS=Homo sapiens GN=OR2T34 PE=2 SV=1   | O2T34_HUMAN  | 35,682.20  | 94.50%  | 1   | 1   | 1   | 9.75%  |
| c(-)-Tiva1 | Ankyrin repeat domain-containing protein 6                            | OS=Homo sapiens GN=ANKRD6 PE=1 SV=3   | ANKR6_HUMAN  | 79,971.00  | 99.10%  | 1   | 1   | 1   | 3.58%  |
| c(-)-Tiva1 | CXXC-type zinc finger protein 11                                      | OS=Homo sapiens GN=CXXC11 PE=2 SV=2   | CB085_HUMAN  | 60,487.20  | 88.60%  | 1   | 1   | 1   | 3.50%  |
| c(-)-Tiva1 | POM121-like protein 2                                                 | OS=Homo sapiens GN=POM121L2 PE=1 SV=1 | P12L2_HUMAN  | 103,082.80 | 93.00%  | 1   | 1   | 2   | 2.27%  |
| c(-)-Tiva1 | Pyrroline-5-carboxylate reductase 1, mitochondrial                    | OS=Homo sapiens GN=PYCR1 PE=1 SV=2    | P5CR1_HUMAN  | 33,361.10  | 94.40%  | 1   | 1   | 1   | 4.08%  |
| c(-)-Tiva1 | 60S ribosomal protein L5                                              | OS=Homo sapiens GN=RPL5 PE=1 SV=3     | RL5_HUMAN    | 34,363.50  | 37.50%  | 0   | 0   | 0   | 0.00%  |
| c(-)-Tiva1 | Coatomeer subunit alpha                                               | OS=Homo sapiens GN=COPA PE=1 SV=2     | COPA_HUMAN   | 138,349.30 | 64.90%  | 0   | 0   | 0   | 0.00%  |
| c(-)-Tiva1 | BTB/POZ domain-containing protein 2                                   | OS=Homo sapiens GN=BTBD2 PE=1 SV=1    | BTBD2_HUMAN  | 55,931.30  | 89.40%  | 1   | 1   | 1   | 2.67%  |
| c(-)-Tiva1 | Zinc finger protein 114                                               | OS=Homo sapiens GN=ZNF114 PE=2 SV=1   | ZN114_HUMAN  | 47,746.20  | 92.30%  | 1   | 1   | 1   | 3.36%  |
| c(-)-Tiva1 | Guanine nucleotide-binding protein G(I)/G(S)/G(T) subunit beta-1      | OS=Homo sapiens GN=GNB1 PE=1 SV=3     | GBB1_HUMAN   | 37,377.50  | 99.10%  | 1   | 1   | 1   | 3.24%  |
| c(-)-Tiva1 | Uncharacterized protein C1orf112                                      | OS=Homo sapiens GN=C1orf112 PE=1 SV=1 | CA112_HUMAN  | 96,557.00  | 42.60%  | 0   | 0   | 0   | 0.00%  |
| c(-)-Tiva1 | HEAT repeat-containing protein 5A                                     | OS=Homo sapiens GN=HEATRSA PE=1 SV=2  | HTR5A_HUMAN  | 222,009.10 | 37.40%  | 0   | 0   | 0   | 0.00%  |
| c(-)-Tiva1 | BRCA1-A complex subunit RAP80                                         | OS=Homo sapiens GN=UIMC1 PE=1 SV=2    | UIMC1_HUMAN  | 79,727.00  | 98.70%  | 1   | 1   | 1   | 3.06%  |
| c(-)-Tiva1 | Annexin A2                                                            | OS=Homo sapiens GN=ANXA2 PE=1 SV=2    | ANXA2_HUMAN  | 38,606.10  | 100.00% | 6   | 6   | 6   | 27.10% |
| c(-)-Tiva1 | Keratin, type I cytoskeletal 19                                       | OS=Homo sapiens GN=KRT19 PE=1 SV=4    | K1C19_HUMAN  | 44,107.10  | 49.60%  | 0   | 0   | 0   | 0.00%  |
| c(-)-Tiva1 | 6-phosphofructokinase, liver type                                     | OS=Homo sapiens GN=PFKL PE=1 SV=6     | K6PL_HUMAN   | 85,019.20  | 0.00%   | 0   | 0   | 0   | 0.00%  |
| c(-)-Tiva1 | Tomoregulin-1                                                         | OS=Homo sapiens GN=TMFEF1 PE=1 SV=1   | TEFF1_HUMAN  | 40,933.30  | 0.00%   | 0   | 0   | 0   | 0.00%  |
| c(-)-Tiva1 | Spermatogenesis-associated protein 2                                  | OS=Homo sapiens GN=SPATA2 PE=1 SV=2   | SPAT2_HUMAN  | 58,428.90  | 0.00%   | 0   | 0   | 0   | 0.00%  |
| c(-)-Tiva1 | Putative stereocilin-like protein                                     | OS=Homo sapiens GN=STRCP1 PE=5 SV=1   | STRCL_HUMAN  | 192,441.30 | 99.00%  | 1   | 1   | 1   | 1.30%  |
| c(-)-Tiva1 | Zinc finger protein 782                                               | OS=Homo sapiens GN=ZNF782 PE=2 SV=1   | ZN782_HUMAN  | 80,903.30  | 84.50%  | 1   | 1   | 1   | 4.43%  |
| c(-)-Tiva1 | Junctophilin-1                                                        | OS=Homo sapiens GN=JPH1 PE=1 SV=2     | JPH1_HUMAN   | 71,686.10  | 87.60%  | 1   | 1   | 1   | 3.48%  |
| c(-)-Tiva1 | Cullin-4A                                                             | OS=Homo sapiens GN=CUL4A PE=1 SV=3    | CUL4A_HUMAN  | 87,683.70  | 0.00%   | 0   | 0   | 0   | 0.00%  |
| c(-)-Tiva1 | Hemicentin-1                                                          | OS=Homo sapiens GN=HMCN1 PE=1 SV=2    | HMCN1_HUMAN  | 613,382.10 | 100.00% | 1   | 1   | 1   | 0.44%  |
| c(-)-Tiva1 | Inositol 1,4,5-trisphosphate receptor type 1                          | OS=Homo sapiens GN=ITPR1 PE=1 SV=2    | ITPR1_HUMAN  | 313,947.70 | 87.80%  | 1   | 1   | 1   | 0.65%  |
| c(-)-Tiva1 | BTB/POZ domain-containing protein KCTD19                              | OS=Homo sapiens GN=KCTD19 PE=2 SV=1   | KCD19_HUMAN  | 104,940.80 | 99.10%  | 1   | 1   | 1   | 1.94%  |
| c(-)-Tiva1 | Tubulointerstitial nephritis antigen-like                             | OS=Homo sapiens GN=TINAGL1 PE=1 SV=1  | TINAL_HUMAN  | 52,387.00  | 98.50%  | 1   | 1   | 1   | 4.50%  |
| c(-)-Tiva1 | Reticulon-4                                                           | OS=Homo sapiens GN=RTN4 PE=1 SV=2     | RTN4_HUMAN   | 129,934.60 | 98.20%  | 1   | 1   | 1   | 2.77%  |
| c(-)-Tiva1 | General transcription factor 3C polypeptide 2                         | OS=Homo sapiens GN=GTF3C2 PE=1 SV=2   | TF3C2_HUMAN  | 100,681.70 | 0.00%   | 0   | 0   | 0   | 0.00%  |
| c(-)-Tiva1 | Carbonyl reductase [NADPH] 1                                          | OS=Homo sapiens GN=CBR1 PE=1 SV=3     | CBR1_HUMAN   | 30,374.80  | 41.60%  | 0   | 0   | 0   | 0.00%  |
| c(-)-Tiva1 | Unconventional myosin-VIb                                             | OS=Homo sapiens GN=MYO7B PE=2 SV=2    | MYO7B_HUMAN  | 241,605.40 | 99.90%  | 1   | 1   | 1   | 0.76%  |
| c(-)-Tiva1 | RecQ-mediated genome instability protein 1                            | OS=Homo sapiens GN=RMI1 PE=1 SV=3     | RMI1_HUMAN   | 70,145.90  | 99.10%  | 1   | 1   | 2   | 2.56%  |
| c(-)-Tiva1 | Integrin beta-1                                                       | OS=Homo sapiens GN=ITGB1 PE=1 SV=2    | ITB1_HUMAN   | 88,415.10  | 100.00% | 2   | 2   | 2   | 3.51%  |
| c(-)-Tiva1 | A-kinase anchor protein 17A                                           | OS=Homo sapiens GN=AKAP17A PE=1 SV=2  | AK17A_HUMAN  | 80,737.30  | 0.00%   | 0   | 0   | 0   | 0.00%  |
| c(-)-Tiva1 | MAN domain-containing glycosylphosphatidylinositol anchor protein 1   | OS=Homo sapiens GN=MDGA1 PE=1 SV=1    | MDGA1_HUMAN  | 105,790.30 | 0.00%   | 0   | 0   | 0   | 0.00%  |
| c(-)-Tiva1 | Protein eyes shut homolog                                             | OS=Homo sapiens GN=EYS PE=1 SV=5      | EYS_HUMAN    | 350,793.50 | 28.40%  | 0   | 0   | 0   | 0.00%  |
| c(-)-Tiva1 | Cytoplasmic dynein 1 light intermediate chain 1                       | OS=Homo sapiens GN=DYNC1L11 PE=1 SV=3 | DC1L1_HUMAN  | 56,580.20  | 99.90%  | 1   | 1   | 1   | 5.93%  |
| c(-)-Tiva1 | CLAP-associating protein 1                                            | OS=Homo sapiens GN=CLASP1 PE=1 SV=1   | CLAP1_HUMAN  | 169,455.80 | 96.80%  | 1   | 1   | 1   | 2.47%  |
| c(-)-Tiva1 | FAD-dependent oxidoreductase domain-containing protein 2              | OS=Homo sapiens GN=FOXRED2 PE=1 SV=1  | FXRD2_HUMAN  | 77,793.80  | 92.50%  | 1   | 1   | 1   | 3.51%  |
| c(-)-Tiva1 | Schlafen family member 13                                             | OS=Homo sapiens GN=SLFN13 PE=2 SV=1   | SLN13_HUMAN  | 102,047.00 | 99.90%  | 1   | 1   | 1   | 2.23%  |
| c(-)-Tiva1 | Zinc finger protein 260                                               | OS=Homo sapiens GN=ZNF260 PE=2 SV=3   | ZN260_HUMAN  | 47,221.70  | 99.10%  | 1   | 1   | 1   | 5.34%  |
| c(-)-Tiva1 | Patatin-like phospholipase domain-containing protein 7                | OS=Homo sapiens GN=PNLA7 PE=2 SV=3    | PLPL7_HUMAN  | 145,735.20 | 90.90%  | 1   | 1   | 1   | 1.59%  |
| c(-)-Tiva1 | PEX5-related protein                                                  | OS=Homo sapiens GN=PEX5L PE=1 SV=2    | PEX5R_HUMAN  | 69,699.00  | 99.10%  | 1   | 1   | 1   | 3.67%  |
| c(-)-Tiva1 | ATP-binding cassette sub-family A member 5                            | OS=Homo sapiens GN=ABCA5 PE=2 SV=2    | ABCA5_HUMAN  | 186,517.10 | 0.00%   | 0   | 0   | 0   | 0.00%  |
| c(-)-Tiva1 | Glutamine-dependent NAD(+) synthetase                                 | OS=Homo sapiens GN=NADSYN1 PE=1 SV=3  | NADE_HUMAN   | 79,286.10  | 0.00%   | 0   | 0   | 0   | 0.00%  |
| c(-)-Tiva1 | Protein phosphatase methyltransferase 1                               | OS=Homo sapiens GN=PPME1 PE=1 SV=3    | PPME1_HUMAN  | 42,315.80  | 98.90%  | 1   | 1   | 1   | 4.92%  |
| c(-)-Tiva1 | Small RNA 2'-O-methyltransferase                                      | OS=Homo sapiens GN=HENMT1 PE=2 SV=1   | HENMT1_HUMAN | 44,524.90  | 48.00%  | 0   | 0   | 0   | 0.00%  |
| c(-)-Tiva1 | E3 ubiquitin-protein ligase TRIM9                                     | OS=Homo sapiens GN=TRIM9 PE=1 SV=1    | TRIM9_HUMAN  | 79,176.80  | 62.50%  | 0   | 0   | 0   | 0.00%  |
| c(-)-Tiva1 | Coiled-coil domain-containing protein 12                              | OS=Homo sapiens GN=CCDC12 PE=1 SV=1   | CCD12_HUMAN  | 19,181.20  | 85.90%  | 1   | 1   | 1   | 13.90% |
| c(-)-Tiva1 | TIP41-like protein                                                    | OS=Homo sapiens GN=TIPRL PE=1 SV=2    | TIPRL_HUMAN  | 31,444.80  | 0.00%   | 0   | 0   | 0   | 0.00%  |
| c(-)-Tiva1 | Protein FAM40A                                                        | OS=Homo sapiens GN=FAM40A PE=1 SV=1   | FA40A_HUMAN  | 95,579.00  | 98.60%  | 1   | 1   | 1   | 1.19%  |
| c(-)-Tiva1 | Cadherin-related family member 1                                      | OS=Homo sapiens GN=CDHR1 PE=1 SV=2    | CDHR1_HUMAN  | 93,595.60  | 0.00%   | 0   | 0   | 0   | 0.00%  |
| c(-)-Tiva1 | SH3 and PX domain-containing protein 2A                               | OS=Homo sapiens GN=SH3PXD2A PE=1 SV=1 | SPD2A_HUMAN  | 125,291.50 | 99.10%  | 1   | 1   | 1   | 1.85%  |
| c(-)-Tiva1 | E3 ubiquitin-protein ligase RNF213                                    | OS=Homo sapiens GN=RNF213 PE=1 SV=3   | RN213_HUMAN  | 591,406.60 | 100.00% | 2   | 2   | 2   | 0.79%  |
| c(-)-Tiva1 | F-actin-capping protein subunit alpha-2                               | OS=Homo sapiens GN=CAPZA2 PE=1 SV=3   | CAZAZ2_HUMAN | 32,949.20  | 100.00% | 2   | 2   | 2   | 13.30% |
| c(-)-Tiva1 | Nuclear pore complex protein Nup160                                   | OS=Homo sapiens GN=NUP160 PE=1 SV=3   | NU160_HUMAN  | 162,125.00 | 39.70%  | 0   | 0   | 0   | 0.00%  |
| c(-)-Tiva1 | Adenosine kinase                                                      | OS=Homo sapiens GN=ADK PE=1 SV=2      | ADK_HUMAN    | 40,546.60  | 0.00%   | 0   | 0   | 0   | 0.00%  |
| c(-)-Tiva1 | Sorcin-related receptor                                               | OS=Homo sapiens GN=SORL1 PE=1 SV=2    | SORL_HUMAN   | 248,426.50 | 98.90%  | 1   | 1   | 1   | 1.31%  |
| c(-)-Tiva1 | Leucine-rich repeats and immunoglobulin-like domains protein 1        | OS=Homo sapiens GN=LRIG1 PE=1 SV=2    | LRIG1_HUMAN  | 119,114.50 | 0.00%   | 0   | 0   | 0   | 0.00%  |
| c(-)-Tiva1 | Keratin-associated protein 3-3                                        | OS=Homo sapiens GN=KRTAP3-3 PE=1 SV=1 | KRA33_HUMAN  | 10,364.50  | 92.30%  | 1   | 1   | 1   | 27.60% |
| c(-)-Tiva1 | Uncharacterized protein C18orf34                                      | OS=Homo sapiens GN=C18orf34 PE=1 SV=3 | CR034_HUMAN  | 102,015.30 | 0.00%   | 0   | 0   | 0   | 0.00%  |
| c(-)-Tiva1 | Pleckstrin homology domain-containing family O member 2               | OS=Homo sapiens GN=PLEKHO2 PE=1 SV=1  | PKHO2_HUMAN  | 53,349.90  | 0.00%   | 0   | 0   | 0   | 0.00%  |
| c(-)-Tiva1 | Zinc finger homeobox protein 3                                        | OS=Homo sapiens GN=ZFHX3 PE=1 SV=2    | ZFHX3_HUMAN  | 404,418.60 | 99.10%  | 1   | 1   | 1   | 0.51%  |
| c(-)-Tiva1 | Neuropilin and toll-like protein 1                                    | OS=Homo sapiens GN=NETO1 PE=2 SV=2    | NETO1_HUMAN  | 60,192.30  | 0.00%   | 0   | 0   | 0   | 0.00%  |
| c(-)-Tiva1 | GTPase IMAP family member 5                                           | OS=Homo sapiens GN=GIMAP5 PE=2 SV=1   | GIMAS_HUMAN  | 34,846.30  | 85.50%  | 1   | 1   | 1   | 9.45%  |
| c(-)-Tiva1 | Interferon alpha-inducible protein 6                                  | OS=Homo sapiens GN=IFI6 PE=2 SV=2     | IFI6_HUMAN   | 12,927.10  | 0.00%   | 0   | 0   | 0   | 0.00%  |
| c(-)-Tiva1 | Acyl-coenzyme A synthetase ACSM6, mitochondrial                       | OS=Homo sapiens GN=ACSM6 PE=2 SV=3    | ACSM6_HUMAN  | 53,586.50  | 99.10%  | 1   | 1   | 1   | 7.71%  |
| c(-)-Tiva1 | Netrin receptor UNC5A                                                 | OS=Homo sapiens GN=UNC5A PE=2 SV=3    | UNC5A_HUMAN  | 92,932.40  | 89.10%  | 1   | 1   | 1   | 2.26%  |
| c(-)-Tiva1 | Neutral amino acid transporter B(0)                                   | OS=Homo sapiens GN=SLC1A5 PE=1 SV=2   | AAAT_HUMAN   | 56,599.80  | 0.00%   | 0   | 0   | 0   | 0.00%  |
| c(-)-Tiva1 | Metallothionein-1X                                                    | OS=Homo sapiens GN=MT1X PE=1 SV=1     | MT1X_HUMAN   | 6,067.60   | 0.00%   | 0   | 0   | 0   | 0.00%  |
| c(-)-Tiva1 | UPF0378 protein KIAA0100                                              | OS=Homo sapiens GN=KIAA0100 PE=1 SV=3 | K0100_HUMAN  | 253,702.80 | 0.00%   | 0   | 0   | 0   | 0.00%  |
| c(-)-Tiva1 | Protein Niban                                                         | OS=Homo sapiens GN=FAM129A PE=1 SV=1  | NIBAN_HUMAN  | 103,134.40 | 0.00%   | 0   | 0   | 0   |        |

|            |                                                                                                       |              |            |         |   |   |   |        |
|------------|-------------------------------------------------------------------------------------------------------|--------------|------------|---------|---|---|---|--------|
| c(-)-Tiva1 | Cytosolic 10-formyltetrahydrofolate dehydrogenase OS=Homo sapiens GN=ALDH1L1 PE=1 SV=2                | AL1L1_HUMAN  | 98,830.20  | 0.00%   | 0 | 0 | 0 | 0.00%  |
| c(-)-Tiva1 | Zinc finger protein Aiolos OS=Homo sapiens GN=IKZF3 PE=1 SV=2                                         | IKZF3_HUMAN  | 58,023.20  | 99.90%  | 1 | 1 | 1 | 5.11%  |
| c(-)-Tiva1 | E3 ubiquitin-protein ligase RNF31 OS=Homo sapiens GN=RNF31 PE=1 SV=1                                  | RNF31_HUMAN  | 119,652.60 | 58.80%  | 0 | 0 | 0 | 0.00%  |
| c(-)-Tiva1 | PAP-associated domain-containing protein 5 OS=Homo sapiens GN=PAPD5 PE=1 SV=2                         | PAPD5_HUMAN  | 63,267.70  | 99.10%  | 1 | 1 | 1 | 5.94%  |
| c(-)-Tiva1 | WD repeat-containing protein 59 OS=Homo sapiens GN=WD59 PE=1 SV=2                                     | WD59_HUMAN   | 109,793.70 | 95.40%  | 1 | 1 | 1 | 1.85%  |
| c(-)-Tiva1 | Importin-9 OS=Homo sapiens GN=IPO9 PE=1 SV=3                                                          | IPO9_HUMAN   | 115,964.00 | 99.10%  | 1 | 1 | 1 | 2.69%  |
| c(-)-Tiva1 | Myosin light polypeptide 6 OS=Homo sapiens GN=MYL6 PE=1 SV=2                                          | MYL6_HUMAN   | 16,929.80  | 100.00% | 2 | 2 | 2 | 16.60% |
| c(-)-Tiva1 | CREB-binding protein OS=Homo sapiens GN=CREBBP PE=1 SV=3                                              | CBP_HUMAN    | 265,345.40 | 83.20%  | 0 | 0 | 0 | 0.00%  |
| c(-)-Tiva1 | E3 ubiquitin-protein ligase SHPRH OS=Homo sapiens GN=SHPRH PE=1 SV=2                                  | SHPRH_HUMAN  | 193,082.20 | 100.00% | 2 | 2 | 2 | 3.15%  |
| c(-)-Tiva1 | Uncharacterized protein C9orf163 OS=Homo sapiens GN=C9orf163 PE=2 SV=1                                | C163_HUMAN   | 22,153.60  | 99.60%  | 1 | 1 | 1 | 18.20% |
| c(-)-Tiva1 | Kinesin-like protein KIF13A OS=Homo sapiens GN=KIF13A PE=1 SV=2                                       | K13A_HUMAN   | 202,308.50 | 99.20%  | 1 | 1 | 1 | 2.33%  |
| c(-)-Tiva1 | Calcium/calmodulin-dependent protein kinase type 1 OS=Homo sapiens GN=CAMK1 PE=1 SV=1                 | KCC1A_HUMAN  | 41,338.20  | 42.70%  | 0 | 0 | 0 | 0.00%  |
| c(-)-Tiva1 | 5-hydroxytryptamine receptor 1E OS=Homo sapiens GN=HTR1E PE=2 SV=1                                    | 5HT1E_HUMAN  | 41,684.40  | 0.00%   | 0 | 0 | 0 | 0.00%  |
| c(-)-Tiva1 | Deleted in lung and esophageal cancer protein 1 OS=Homo sapiens GN=DLEC1 PE=2 SV=2                    | DLEC1_HUMAN  | 195,685.60 | 0.00%   | 0 | 0 | 0 | 0.00%  |
| c(-)-Tiva1 | EF-hand domain-containing protein C3orf25 OS=Homo sapiens GN=C3orf25 PE=2 SV=1                        | CC025_HUMAN  | 66,552.30  | 0.00%   | 0 | 0 | 0 | 0.00%  |
| c(-)-Tiva1 | Cancer/testis antigen 62 OS=Homo sapiens GN=CT62 PE=2 SV=1                                            | CT62_HUMAN   | 15,412.40  | 99.10%  | 1 | 1 | 1 | 11.80% |
| c(-)-Tiva1 | 60S ribosomal protein L6 OS=Homo sapiens GN=RPL6 PE=1 SV=3                                            | RL6_HUMAN    | 32,729.30  | 99.10%  | 1 | 1 | 1 | 5.21%  |
| c(-)-Tiva1 | Basic salivary proline-rich protein 3 OS=Homo sapiens GN=PRB3 PE=1 SV=2                               | PRB3_HUMAN   | 30,979.50  | 0.00%   | 0 | 0 | 0 | 0.00%  |
| c(-)-Tiva1 | Polyribonucleotide nucleotidyltransferase 1, mitochondrial OS=Homo sapiens GN=PNPT1 PE=1 SV=2         | PNPT1_HUMAN  | 85,952.10  | 99.30%  | 1 | 1 | 1 | 3.19%  |
| c(-)-Tiva1 | Sentrin-specific protease 7 OS=Homo sapiens GN=SEN7 PE=1 SV=4                                         | SEN7_HUMAN   | 119,661.40 | 0.00%   | 0 | 0 | 0 | 0.00%  |
| c(-)-Tiva1 | Cytochrome P450 1A1 OS=Homo sapiens GN=CYP1A1 PE=1 SV=1                                               | CP1A1_HUMAN  | 58,166.60  | 0.00%   | 0 | 0 | 0 | 0.00%  |
| c(-)-Tiva1 | Chondroitin sulfate synthase 3 OS=Homo sapiens GN=CHSY3 PE=1 SV=3                                     | CHS53_HUMAN  | 100,287.80 | 0.00%   | 0 | 0 | 0 | 0.00%  |
| c(-)-Tiva1 | Zinc finger protein DZIP1 OS=Homo sapiens GN=DZIP1 PE=1 SV=1                                          | DZIP1_HUMAN  | 98,665.40  | 0.00%   | 0 | 0 | 0 | 0.00%  |
| c(-)-Tiva1 | Heat shock cognate 71 kDa protein OS=Homo sapiens GN=HSPA8 PE=1 SV=1                                  | HSP7C_HUMAN  | 70,899.80  | 100.00% | 1 | 2 | 2 | 1.70%  |
| c(-)-Tiva1 | Putative HERC2-like protein 3 OS=Homo sapiens GN=HERC2P3 PE=5 SV=2                                    | HRC23_HUMAN  | 128,945.50 | 99.10%  | 1 | 1 | 1 | 1.73%  |
| c(-)-Tiva1 | DPY30 domain-containing protein 1 OS=Homo sapiens GN=DYDC1 PE=1 SV=1                                  | DYDC1_HUMAN  | 20,893.60  | 92.80%  | 1 | 1 | 1 | 7.91%  |
| c(-)-Tiva1 | AT-rich interactive domain-containing protein 5B OS=Homo sapiens GN=ARID5B PE=1 SV=3                  | ARISB_HUMAN  | 132,378.50 | 0.00%   | 0 | 0 | 0 | 0.00%  |
| c(-)-Tiva1 | KAT8 regulatory NSL complex subunit 1-like protein OS=Homo sapiens GN=KANSL1L PE=1 SV=2               | KAL1L_HUMAN  | 112,256.00 | 84.10%  | 1 | 1 | 1 | 2.84%  |
| c(-)-Tiva1 | Integrator complex subunit 3 OS=Homo sapiens GN=INTS3 PE=1 SV=1                                       | INT3_HUMAN   | 118,074.00 | 99.90%  | 1 | 1 | 1 | 3.16%  |
| c(-)-Tiva1 | DNA topoisomerase 2-beta OS=Homo sapiens GN=TOP2B PE=1 SV=3                                           | TOP2B_HUMAN  | 183,273.10 | 55.70%  | 0 | 0 | 0 | 0.00%  |
| c(-)-Tiva1 | Probable exonuclease mut-7 homolog OS=Homo sapiens GN=EXD3 PE=1 SV=3                                  | MUT7_HUMAN   | 96,597.80  | 100.00% | 2 | 2 | 2 | 5.48%  |
| c(-)-Tiva1 | Baculoviral IAP repeat-containing protein 6 OS=Homo sapiens GN=BIRC6 PE=1 SV=2                        | BIRC6_HUMAN  | 530,254.90 | 99.90%  | 1 | 1 | 1 | 0.66%  |
| c(-)-Tiva1 | Syntaxin-6 OS=Homo sapiens GN=STX6 PE=1 SV=1                                                          | STX6_HUMAN   | 29,176.20  | 0.00%   | 0 | 0 | 0 | 0.00%  |
| c(-)-Tiva1 | Keratin-associated protein 4-1 OS=Homo sapiens GN=KRTAP4-1 PE=2 SV=3                                  | KRA41_HUMAN  | 15,238.40  | 100.00% | 1 | 1 | 1 | 16.40% |
| c(-)-Tiva1 | Bile acid receptor OS=Homo sapiens GN=NR1H4 PE=1 SV=2                                                 | NR1H4_HUMAN  | 55,914.90  | 99.50%  | 1 | 1 | 1 | 2.88%  |
| c(-)-Tiva1 | Integrin beta-2 OS=Homo sapiens GN=ITGB2 PE=1 SV=2                                                    | ITB2_HUMAN   | 84,782.00  | 92.50%  | 1 | 1 | 1 | 3.64%  |
| c(-)-Tiva1 | Cation channel sperm-associated protein 2 OS=Homo sapiens GN=CATSPER2 PE=1 SV=2                       | CTS2R_HUMAN  | 62,043.60  | 0.00%   | 0 | 0 | 0 | 0.00%  |
| c(-)-Tiva1 | Regulator of G-protein signaling 21 OS=Homo sapiens GN=RG521 PE=2 SV=1                                | RG521_HUMAN  | 17,672.60  | 0.00%   | 0 | 0 | 0 | 0.00%  |
| c(-)-Tiva1 | Coiled-coil domain-containing protein 87 OS=Homo sapiens GN=CCDC87 PE=2 SV=2                          | CCD87_HUMAN  | 96,405.60  | 56.90%  | 0 | 0 | 0 | 0.00%  |
| c(-)-Tiva1 | A disintegrin and metalloproteinase with thrombospondin motifs 2 OS=Homo sapiens GN=ADAMTS2 PE=2 SV=2 | ATS2_HUMAN   | 134,754.20 | 97.30%  | 0 | 0 | 0 | 0.00%  |
| c(-)-Tiva1 | Beta-1 adrenergic receptor OS=Homo sapiens GN=ADRB1 PE=1 SV=2                                         | ADRB1_HUMAN  | 51,323.80  | 0.00%   | 0 | 0 | 0 | 0.00%  |
| c(-)-Tiva1 | Enhancer of mRNA-decapping protein 4 OS=Homo sapiens GN=EDC4 PE=1 SV=1                                | EDC4_HUMAN   | 151,662.20 | 0.00%   | 0 | 0 | 0 | 0.00%  |
| c(-)-Tiva1 | Iron-sulfur protein NUBPL OS=Homo sapiens GN=NUBPL PE=1 SV=3                                          | NUBPL_HUMAN  | 34,082.80  | 92.30%  | 1 | 1 | 1 | 11.90% |
| c(-)-Tiva1 | SH3 and PX domain-containing protein 2B OS=Homo sapiens GN=SH3PX2B PE=1 SV=3                          | SPD2B_HUMAN  | 101,580.90 | 94.00%  | 1 | 1 | 1 | 2.09%  |
| c(-)-Tiva1 | Uncharacterized protein C11orf71 OS=Homo sapiens GN=C11orf71 PE=2 SV=2                                | CK071_HUMAN  | 13,249.20  | 96.50%  | 1 | 1 | 1 | 12.20% |
| c(-)-Tiva1 | Zinc finger protein 343 OS=Homo sapiens GN=ZNF343 PE=2 SV=1                                           | ZN343_HUMAN  | 69,219.60  | 99.70%  | 1 | 1 | 1 | 2.34%  |
| c(-)-Tiva1 | Leucine-rich repeats and immunoglobulin-like domains protein 2 OS=Homo sapiens GN=LRIG2 PE=1 SV=3     | LRIG2_HUMAN  | 118,969.10 | 0.00%   | 0 | 0 | 0 | 0.00%  |
| c(-)-Tiva1 | 40S ribosomal protein S18 OS=Homo sapiens GN=RPS18 PE=1 SV=3                                          | RS18_HUMAN   | 17,719.30  | 99.10%  | 1 | 1 | 1 | 7.24%  |
| c(-)-Tiva1 | UHRF1-binding protein 1 OS=Homo sapiens GN=UHRF1BP1 PE=1 SV=1                                         | URFB1_HUMAN  | 159,487.70 | 99.10%  | 1 | 1 | 1 | 2.01%  |
| c(-)-Tiva1 | EMILIN-3 OS=Homo sapiens GN=EMILIN3 PE=2 SV=2                                                         | EMIL3_HUMAN  | 82,646.40  | 99.10%  | 1 | 1 | 1 | 3.66%  |
| c(-)-Tiva1 | Selenoprotein O OS=Homo sapiens GN=SELO PE=2 SV=3                                                     | SELO_HUMAN   | 73,490.20  | 93.20%  | 1 | 1 | 1 | 4.93%  |
| c(-)-Tiva1 | Armadoillo repeat-containing X-linked protein 5 OS=Homo sapiens GN=ARMX5 PE=2 SV=1                    | ARMX5_HUMAN  | 62,346.90  | 0.00%   | 0 | 0 | 0 | 0.00%  |
| c(-)-Tiva1 | Solute carrier family 22 member 11 OS=Homo sapiens GN=SLC22A11 PE=1 SV=1                              | S22AB_HUMAN  | 59,973.40  | 0.00%   | 0 | 0 | 0 | 0.00%  |
| c(-)-Tiva1 | Forkhead box protein C1 OS=Homo sapiens GN=FOXC1 PE=1 SV=3                                            | FOXC1_HUMAN  | 56,789.80  | 0.00%   | 0 | 0 | 0 | 0.00%  |
| c(-)-Tiva1 | Heterogeneous nuclear ribonucleoprotein F OS=Homo sapiens GN=HNRNPF PE=1 SV=3                         | HNRPF_HUMAN  | 45,671.90  | 94.60%  | 1 | 1 | 1 | 3.86%  |
| c(-)-Tiva1 | Sideroflexin-2 OS=Homo sapiens GN=SFNX2 PE=1 SV=2                                                     | SFXN2_HUMAN  | 36,232.00  | 0.00%   | 0 | 0 | 0 | 0.00%  |
| c(-)-Tiva1 | RNA-binding protein MEX3A OS=Homo sapiens GN=MEX3A PE=1 SV=1                                          | MEX3A_HUMAN  | 54,173.20  | 0.00%   | 0 | 0 | 0 | 0.00%  |
| c(-)-Tiva1 | Coiled-coil domain-containing protein 111 OS=Homo sapiens GN=CCDC111 PE=1 SV=2                        | CC111_HUMAN  | 64,384.70  | 0.00%   | 0 | 0 | 0 | 0.00%  |
| c(-)-Tiva1 | Protein regulator of cytokinesis 1 OS=Homo sapiens GN=PRC1 PE=1 SV=2                                  | PRC1_HUMAN   | 71,607.90  | 90.60%  | 1 | 1 | 1 | 4.03%  |
| c(-)-Tiva1 | Patched domain-containing protein 2 OS=Homo sapiens GN=PTCHD2 PE=2 SV=2                               | PTH2D_HUMAN  | 153,050.60 | 0.00%   | 0 | 0 | 0 | 0.00%  |
| c(-)-Tiva1 | Actin-like protein 6A OS=Homo sapiens GN=ACTL6A PE=1 SV=1                                             | ACL6A_HUMAN  | 47,461.10  | 75.70%  | 0 | 0 | 0 | 0.00%  |
| c(-)-Tiva1 | Unconventional myosin-VI OS=Homo sapiens GN=MYO6 PE=1 SV=4                                            | MYO6_HUMAN   | 149,697.10 | 100.00% | 4 | 4 | 4 | 4.10%  |
| c(-)-Tiva1 | Schlafen family member 12 OS=Homo sapiens GN=SLFN12 PE=1 SV=2                                         | SLN12_HUMAN  | 66,975.40  | 83.80%  | 1 | 1 | 1 | 2.08%  |
| c(-)-Tiva1 | Transcription initiation factor IIB OS=Homo sapiens GN=GTTF2 PE=1 SV=1                                | TF2B_HUMAN   | 34,834.00  | 99.80%  | 1 | 1 | 1 | 8.23%  |
| c(-)-Tiva1 | Aryl hydrocarbon receptor repressor OS=Homo sapiens GN=AHRR PE=2 SV=3                                 | AHRR_HUMAN   | 76,265.70  | 99.10%  | 1 | 1 | 1 | 4.99%  |
| c(-)-Tiva1 | Membrane-associated phosphatidylinositol transfer protein 1 OS=Homo sapiens GN=PITPNM1 PE=1 SV=4      | PITM1_HUMAN  | 134,848.40 | 0.00%   | 0 | 0 | 0 | 0.00%  |
| c(-)-Tiva1 | Connector enhancer of kinase suppressor of ras 1 OS=Homo sapiens GN=CNKSR1 PE=1 SV=1                  | CNKR1_HUMAN  | 79,706.20  | 98.60%  | 1 | 1 | 1 | 3.33%  |
| c(-)-Tiva1 | Tyrosine-protein phosphatase non-receptor type 21 OS=Homo sapiens GN=PTPN21 PE=1 SV=2                 | PTN21_HUMAN  | 133,282.70 | 0.00%   | 0 | 0 | 0 | 0.00%  |
| c(-)-Tiva1 | Vacuolar protein sorting-associated protein 13B OS=Homo sapiens GN=VPS13B PE=1 SV=2                   | VP13B_HUMAN  | 448,661.90 | 89.50%  | 1 | 1 | 1 | 0.57%  |
| c(-)-Tiva1 | Ras-GEF domain-containing family member 1C OS=Homo sapiens GN=RASGEF1C PE=2 SV=2                      | RGF1C_HUMAN  | 52,871.40  | 0.00%   | 0 | 0 | 0 | 0.00%  |
| c(-)-Tiva1 | Peroxisomal targeting signal 1 receptor OS=Homo sapiens GN=PEX5 PE=1 SV=3                             | PEX5_HUMAN   | 70,865.90  | 99.10%  | 1 | 1 | 1 | 2.35%  |
| c(-)-Tiva1 | Thyroid adenoma-associated protein OS=Homo sapiens GN=THADA PE=1 SV=1                                 | THADA_HUMAN  | 219,611.90 | 74.50%  | 0 | 0 | 0 | 0.00%  |
| c(-)-Tiva1 | Zinc finger protein 571 OS=Homo sapiens GN=ZNF571 PE=2 SV=3                                           | ZN571_HUMAN  | 70,792.40  | 0.00%   | 0 | 0 | 0 | 0.00%  |
| c(-)-Tiva1 | Fascin-3 OS=Homo sapiens GN=FSCN3 PE=1 SV=1                                                           | FSCN3_HUMAN  | 56,624.10  | 85.40%  | 1 | 1 | 1 | 5.02%  |
| c(-)-Tiva1 | snRNA-activating protein complex subunit 4 OS=Homo sapiens GN=SNAPC4 PE=1 SV=1                        | SNPC4_HUMAN  | 159,433.80 | 0.00%   | 0 | 0 | 0 | 0.00%  |
| c(-)-Tiva1 | GTP-binding protein 10 OS=Homo sapiens GN=GTPBP10 PE=1 SV=1                                           | GTPBA_HUMAN  | 42,934.80  | 87.50%  | 1 | 1 | 1 | 7.49%  |
| c(-)-Tiva1 | Interleukin-3 receptor subunit alpha OS=Homo sapiens GN=IL3RA PE=1 SV=1                               | IL3RA_HUMAN  | 43,330.10  | 96.90%  | 1 | 1 | 1 | 2.38%  |
| c(-)-Tiva1 | Protein FAM75E1 OS=Homo sapiens GN=FAM75E1 PE=2 SV=2                                                  | F75E1_HUMAN  | 157,134.70 | 0.00%   | 0 | 0 | 0 | 0.00%  |
| c(-)-Tiva1 | Zinc finger protein OZF OS=Homo sapiens GN=ZNF146 PE=1 SV=2                                           | OZF_HUMAN    | 33,307.10  | 99.80%  | 1 | 1 | 1 | 7.88%  |
| c(-)-Tiva1 | CCAAT/enhancer-binding protein beta OS=Homo sapiens GN=CEBPB PE=1 SV=2                                | CEBPB_HUMAN  | 36,106.90  | 100.00% | 2 | 2 | 2 | 10.10% |
| c(-)-Tiva1 | Synergism gamma OS=Homo sapiens GN=SYNRG PE=1 SV=2                                                    | SYNRG_HUMAN  | 140,657.80 | 98.00%  | 1 | 1 | 1 | 2.59%  |
| c(-)-Tiva1 | Protein FAM71B OS=Homo sapiens GN=FAM71B PE=1 SV=2                                                    | FA71B_HUMAN  | 64,756.40  | 0.00%   | 0 | 0 | 0 | 0.00%  |
| c(-)-Tiva1 | Tubulin polyglutamylase TTL4 OS=Homo sapiens GN=TTL4 PE=1 SV=2                                        | TTL4_HUMAN   | 133,382.20 | 0.00%   | 0 | 0 | 0 | 0.00%  |
| c(-)-Tiva1 | Rab-like protein 5 OS=Homo sapiens GN=RABL5 PE=2 SV=1                                                 | RABL5_HUMAN  | 20,835.20  | 99.10%  | 1 | 1 | 1 | 8.65%  |
| c(-)-Tiva1 | E3 ubiquitin-protein ligase MARCB6 OS=Homo sapiens GN=MARCB6 PE=1 SV=2                                | MARH6_HUMAN  | 102,546.70 | 0.00%   | 0 | 0 | 0 | 0.00%  |
| c(-)-Tiva1 | Tubulin beta-3 chain OS=Homo sapiens GN=TUBB3 PE=1 SV=2                                               | TBB3_HUMAN   | 50,432.70  | 100.00% | 2 | 3 | 4 | 6.00%  |
| c(-)-Tiva1 | N-acetyltransferase 6 OS=Homo sapiens GN=NAT6 PE=2 SV=2                                               | NAT6_HUMAN   | 31,445.80  | 92.50%  | 1 | 1 | 1 | 7.34%  |
| c(-)-Tiva1 | Myocardial zonula adherens protein OS=Homo sapiens GN=MYZAP PE=1 SV=1                                 | MYZAP_HUMAN  | 54,206.20  | 34.60%  | 0 | 0 | 0 | 0.00%  |
| c(-)-Tiva1 | Late cornified envelope protein 3C OS=Homo sapiens GN=LCE3C PE=2 SV=1                                 | LCE3C_HUMAN  | 9,728.00   | 98.90%  | 1 | 1 | 1 | 20.20% |
| c(-)-Tiva1 | Flotillin-1 OS=Homo sapiens GN=FLOT1 PE=1 SV=3                                                        | FLOT1_HUMAN  | 47,354.80  | 99.10%  | 1 | 1 | 1 | 4.45%  |
| c(-)-Tiva1 | Keratin-associated protein 4-2 OS=Homo sapiens GN=KRTAP4-2 PE=2 SV=2                                  | KRA42_HUMAN  | 14,459.60  | 99.50%  | 1 | 1 | 1 | 11.00% |
| c(-)-Tiva1 | 40S ribosomal protein S3a OS=Homo sapiens GN=RPS3A PE=1 SV=2                                          | RS3A_HUMAN   | 29,945.30  | 100.00% | 6 | 6 | 6 | 28.00% |
| c(-)-Tiva1 | Protein phosphatase 1 regulatory subunit 29 OS=Homo sapiens GN=ELFN2 PE=1 SV=1                        | PPR29_HUMAN  | 89,689.10  | 99.10%  | 1 | 1 | 1 | 2.44%  |
| c(-)-Tiva1 | Keratin, type II cytoskeletal 7 OS=Homo sapiens GN=KRT7 PE=1 SV=5                                     | K2C7_HUMAN   | 51,387.30  | 100.00% | 8 | 8 | 8 | 24.10% |
| c(-)-Tiva1 | Ankyrin repeat and protein kinase domain-containing protein 1 OS=Homo sapiens GN=ANKK1 PE=1 SV=1      | ANKK1_HUMAN  | 84,634.10  | 98.60%  | 1 | 1 | 1 | 3.92%  |
| c(-)-Tiva1 | Ankyrin repeat domain-containing protein SOWAHB OS=Homo sapiens GN=SOWAHB PE=2 SV=1                   | SWAHB_HUMAN  | 85,743.20  | 0.00%   | 0 | 0 | 0 | 0.00%  |
| c(-)-Tiva1 | Zinc finger protein RIF OS=Homo sapiens GN=RLF PE=1 SV=2                                              | RLF_HUMAN    | 217,953.60 | 38.30%  | 0 | 0 | 0 | 0.00%  |
| c(-)-Tiva1 | Kinesin-like protein KIF3B OS=Homo sapiens GN=KIF3B PE=1 SV=1                                         | KIF3B_HUMAN  | 85,127.00  | 68.60%  | 0 | 0 | 0 | 0.00%  |
| c(-)-Tiva1 | Guanine nucleotide-binding protein subunit beta-2-like 1 OS=Homo sapiens GN=GNB2L1 PE=1 SV=3          | GBLP_HUMAN   | 35,077.00  | 76.00%  | 0 | 0 | 0 | 0.00%  |
| c(-)-Tiva1 | Transmembrane protein 196 OS=Homo sapiens GN=TMEM196 PE=2 SV=2                                        | TM196_HUMAN  | 19,025.80  | 73.10%  | 0 | 0 | 0 | 0.00%  |
| c(-)-Tiva1 | Ryanodine receptor 3 OS=Homo sapiens GN=RYSR3 PE=1 SV=3                                               | RYSR3_HUMAN  | 552,044.40 | 99.90%  | 1 | 1 | 1 | 0.51%  |
| c(-)-Tiva1 | Large neutral amino acids transporter small subunit 4 OS=Homo sapiens GN=SLC43A2 PE=1 SV=1            | LAT4_HUMAN   | 62,749.30  | 0.00%   | 0 | 0 | 0 | 0.00%  |
| c(-)-Tiva1 | G-protein coupled receptor family C group 5 member C OS=Homo sapiens GN=GPRC5C PE=1 SV=2              | GPC5C_HUMAN  | 48,193.50  | 83.40%  | 0 | 0 | 0 | 0.00%  |
| c(-)-Tiva1 | Pyroglutamylated Rfamide peptide receptor OS=Homo sapiens GN=QRFP R PE=1 SV=2                         | QRFP R_HUMAN | 49,488.80  | 89.00%  | 1 | 1 | 1 | 3.94%  |
| c(-)-Tiva1 | Transforming growth factor beta-2 OS=Homo sapiens GN=TGFB2 PE=1 SV=1                                  | TGFB2_HUMAN  | 47,749.40  | 97.70%  | 1 | 1 | 1 | 6.28%  |
| c(-)-Tiva1 | OTU domain-containing protein 3 OS=Homo sapiens GN=OTUD3 PE=1 SV=1                                    | OTUD3_HUMAN  | 45,124.10  | 26.40%  | 0 | 0 | 0 | 0.00%  |
| c(-)-Tiva1 | Basigin OS=Homo sapiens GN=BSG PE=1 SV=2                                                              | BASI_HUMAN   | 42,199.70  | 97.30%  | 1 | 1 | 1 | 4.68%  |
| c(-)-Tiva1 | Stress-70 protein, mitochondrial OS=Homo sapiens GN=HSPA9 PE=1 SV=2                                   | GRP75_HUMAN  | 73,681.30  | 75.50%  | 0 | 0 | 0 | 0.00%  |
| c(-)-Tiva1 | SET domain-containing protein 5 OS=Homo sapiens GN=SETD5 PE=1 SV=2                                    | SETD5_HUMAN  | 157,515.40 | 63.00%  | 0 | 0 | 0 | 0.00%  |
| c(-)-Tiva1 | ADP-ribosylation factor-like protein 15 OS=Homo sapiens GN=ARL15 PE=1 SV=1                            | ARL15_HUMAN  | 22,877.20  | 88.40%  | 1 | 1 | 1 | 4.90%  |
| c(-)-Tiva1 | Serine/threonine-protein kinase B-raf OS=Homo sapiens GN=BRAF PE=1 SV=4                               | BRAF_HUMAN   | 84,438.90  | 0.00%   | 0 | 0 | 0 | 0.00%  |
| c(-)-Tiva1 | S-acyl fatty acid synthase thioesterase, medium chain OS=Homo sapiens GN=OLAH PE=2 SV=1               | SAST_HUMAN   | 29,931.70  | 0.00%   | 0 | 0 | 0 | 0.00%  |
| c(-)-Tiva1 | Lupus La protein OS=Homo sapiens GN=SSB PE=1 SV=2                                                     | LA_HUMAN     | 46,839.00  | 27.10%  | 0 | 0 | 0 | 0.00%  |



























































































|            |                                                                                                           |                                        |                           |             |           |        |   |    |        |        |
|------------|-----------------------------------------------------------------------------------------------------------|----------------------------------------|---------------------------|-------------|-----------|--------|---|----|--------|--------|
| c(+)-Tiva2 | Oxysterol-binding protein-related protein 9                                                               | OS=Homo sapiens GN=OSBPL9 PE=1 SV=2    | OSBL9_HUMAN               | 83,186.20   | 99.10%    | 1      | 1 | 1  | 3.12%  |        |
| c(+)-Tiva2 | Bromodomain and WD repeat-containing protein 3                                                            | OS=Homo sapiens GN=BRWD3 PE=1 SV=2     | BRWD3_HUMAN               | 203,600.00  | 84.30%    | 1      | 1 | 1  | 1.44%  |        |
| c(+)-Tiva2 | Zinc finger protein 677                                                                                   | OS=Homo sapiens GN=ZNF677 PE=2 SV=1    | ZNF677_HUMAN              | 67,997.10   | 0.00%     | 0      | 0 | 0  | 0.00%  |        |
| c(+)-Tiva2 | Poly(ADP-ribose) glycohydrolase                                                                           | OS=Homo sapiens GN=PARG PE=1 SV=1      | PARG_HUMAN                | 111,112.20  | 45.10%    | 0      | 0 | 0  | 0.00%  |        |
| c(+)-Tiva2 | Alpha-protein kinase 2                                                                                    | OS=Homo sapiens GN=ALPK2 PE=1 SV=3     | ALPK2_HUMAN               | 237,010.90  | 97.10%    | 1      | 1 | 1  | 0.83%  |        |
| c(+)-Tiva2 | Probable alpha-ketoglutarate-dependent dioxygenase ABH6                                                   | OS=Homo sapiens GN=ALKBH6 PE=1 SV=2    | ALKBH6_HUMAN              | 26,484.00   | 99.10%    | 1      | 1 | 1  | 14.70% |        |
| c(+)-Tiva2 | Probable ubiquitin carboxyl-terminal hydrolase FAF-X                                                      | OS=Homo sapiens GN=USP9X PE=1 SV=3     | USP9X_HUMAN               | 292,284.20  | 63.90%    | 0      | 0 | 0  | 0.00%  |        |
| c(+)-Tiva2 | Adenylyltransferase and sulfuryltransferase MOC53                                                         | OS=Homo sapiens GN=MOC53 PE=1 SV=1     | MOC53_HUMAN               | 49,669.50   | 86.00%    | 1      | 1 | 1  | 3.26%  |        |
| c(+)-Tiva2 | Ankyrin repeat domain-containing protein 55                                                               | OS=Homo sapiens GN=ANKRD55 PE=2 SV=2   | ANKR55_HUMAN              | 68,283.40   | 0.00%     | 0      | 0 | 0  | 0.00%  |        |
| c(+)-Tiva2 | Serotransferrin                                                                                           | OS=Homo sapiens GN=TF PE=1 SV=3        | TRFE_HUMAN                | 77,064.30   | 0.00%     | 0      | 0 | 0  | 0.00%  |        |
| c(+)-Tiva2 | Zinc finger SWIM domain-containing protein KIAA0913                                                       | OS=Homo sapiens GN=KIAA0913 PE=1 SV=1  | K0913_HUMAN               | 197,297.10  | 0.00%     | 0      | 0 | 0  | 0.00%  |        |
| c(+)-Tiva2 | Keratin, type I cytoskeletal 17                                                                           | OS=Homo sapiens GN=KRT17 PE=1 SV=2     | K1C17_HUMAN               | 48,106.70   | 53.30%    | 0      | 0 | 0  | 0.00%  |        |
| c(+)-Tiva2 | Triadin                                                                                                   | OS=Homo sapiens GN=TRDN PE=1 SV=4      | TRDN_HUMAN                | 81,596.80   | 0.00%     | 0      | 0 | 0  | 0.00%  |        |
| c(+)-Tiva2 | Intersectin-1                                                                                             | OS=Homo sapiens GN=ITSN1 PE=1 SV=3     | ITSN1_HUMAN               | 195,424.50  | 100.00%   | 1      | 1 | 1  | 2.15%  |        |
| c(+)-Tiva2 | Chromodomain-helicase-DNA-binding protein 8                                                               | OS=Homo sapiens GN=CHD8 PE=1 SV=5      | CHD8_HUMAN                | 290,522.30  | 99.10%    | 1      | 1 | 1  | 0.62%  |        |
| c(+)-Tiva2 | GON-4-like protein                                                                                        | OS=Homo sapiens GN=GON4L PE=1 SV=1     | GON4L_HUMAN               | 248,619.20  | 98.10%    | 1      | 1 | 2  | 0.94%  |        |
| c(+)-Tiva2 | AP-5 complex subunit beta-1                                                                               | OS=Homo sapiens GN=AP5B1 PE=1 SV=4     | AP5B1_HUMAN               | 93,952.50   | 0.00%     | 0      | 0 | 0  | 0.00%  |        |
| c(+)-Tiva2 | Putative heat shock protein HSP 90-alpha A5                                                               | OS=Homo sapiens GN=HSP90AA5P PE=1 SV=1 | HS905_HUMAN               | 38,738.70   | 0.00%     | 0      | 0 | 0  | 0.00%  |        |
| c(+)-Tiva2 | 26S protease regulatory subunit 8                                                                         | OS=Homo sapiens GN=PSMC5 PE=1 SV=1     | PRS8_HUMAN                | 45,627.20   | 74.80%    | 0      | 0 | 0  | 0.00%  |        |
| c(+)-Tiva2 | Uncharacterized protein KIAA1841                                                                          | OS=Homo sapiens GN=KIAA1841 PE=2 SV=2  | K1841_HUMAN               | 82,008.50   | 0.00%     | 0      | 0 | 0  | 0.00%  |        |
| c(+)-Tiva2 | Regulation of nuclear pre-mRNA domain-containing protein 2                                                | OS=Homo sapiens GN=RPRD2 PE=1 SV=1     | RPRD2_HUMAN               | 156,023.00  | 66.90%    | 0      | 0 | 0  | 0.00%  |        |
| c(+)-Tiva2 | E3 ubiquitin-protein ligase BRE1B                                                                         | OS=Homo sapiens GN=RNF40 PE=1 SV=4     | BRE1B_HUMAN               | 113,652.80  | 99.10%    | 1      | 1 | 1  | 1.10%  |        |
| c(+)-Tiva2 | Inositol 1,4,5-trisphosphate receptor type 2                                                              | OS=Homo sapiens GN=ITPR2 PE=1 SV=2     | ITPR2_HUMAN               | 308,067.80  | 0.00%     | 0      | 0 | 0  | 0.00%  |        |
| c(+)-Tiva2 | Calpain-8                                                                                                 | OS=Homo sapiens GN=CAPN8 PE=2 SV=3     | CAN8_HUMAN                | 79,146.40   | 0.00%     | 0      | 0 | 0  | 0.00%  |        |
| c(+)-Tiva2 | Bystin                                                                                                    | OS=Homo sapiens GN=BYSL PE=1 SV=3      | BYST_HUMAN                | 49,602.50   | 0.00%     | 0      | 0 | 0  | 0.00%  |        |
| c(+)-Tiva2 | Attractin                                                                                                 | OS=Homo sapiens GN=ATRN PE=1 SV=2      | ATRN_HUMAN                | 158,536.30  | 0.00%     | 0      | 0 | 0  | 0.00%  |        |
| c(+)-Tiva2 | Death-associated protein kinase 1                                                                         | OS=Homo sapiens GN=DAPK1 PE=1 SV=6     | DAPK1_HUMAN               | 160,049.30  | 95.70%    | 1      | 1 | 1  | 1.12%  |        |
| c(+)-Tiva2 | Rho GTPase-activating protein 10                                                                          | OS=Homo sapiens GN=ARHGAP10 PE=1 SV=1  | RHG10_HUMAN               | 89,376.90   | 0.00%     | 0      | 0 | 0  | 0.00%  |        |
| c(+)-Tiva2 | 26S proteasome non-ATPase regulatory subunit 5                                                            | OS=Homo sapiens GN=PSMD5 PE=1 SV=3     | PSMD5_HUMAN               | 56,197.00   | 0.00%     | 0      | 0 | 0  | 0.00%  |        |
| c(+)-Tiva2 | A-kinase anchor protein 13                                                                                | OS=Homo sapiens GN=AKAP13 PE=1 SV=2    | AKP13_HUMAN               | 307,548.60  | 78.30%    | 0      | 0 | 0  | 0.00%  |        |
| c(+)-Tiva2 | 60S ribosomal protein L17                                                                                 | OS=Homo sapiens GN=RPL17 PE=1 SV=3     | RL17_HUMAN                | 21,397.40   | 93.30%    | 1      | 1 | 1  | 5.43%  |        |
| c(+)-Tiva2 | Golgin subfamily A member 8A                                                                              | OS=Homo sapiens GN=GOLGA8A PE=1 SV=3   | GOG8A_HUMAN               | 70,117.00   | 86.50%    | 1      | 1 | 1  | 3.33%  |        |
| c(+)-Tiva2 | Olfactory receptor 52E8                                                                                   | OS=Homo sapiens GN=OR52E8 PE=1 SV=3    | OS2E8_HUMAN               | 35,915.30   | 97.00%    | 1      | 1 | 1  | 7.26%  |        |
| c(+)-Tiva2 | Caseinolytic peptidase B protein homolog                                                                  | OS=Homo sapiens GN=CLPB PE=1 SV=1      | CLPB_HUMAN                | 78,731.20   | 0.00%     | 0      | 0 | 0  | 0.00%  |        |
| c(+)-Tiva2 | Protein disulfide-isomerase                                                                               | OS=Homo sapiens GN=P4HB PE=1 SV=3      | PDIA1_HUMAN               | 57,118.10   | 99.10%    | 1      | 1 | 1  | 4.92%  |        |
| c(+)-Tiva2 | U5 small nuclear ribonucleoprotein 200 kDa helicase                                                       | OS=Homo sapiens GN=SNRNP200 PE=1 SV=2  | US20_HUMAN                | 244,513.80  | 0.00%     | 0      | 0 | 0  | 0.00%  |        |
| c(+)-Tiva2 | Signal-transducing adaptor protein 2                                                                      | OS=Homo sapiens GN=STAP2 PE=1 SV=2     | STAP2_HUMAN               | 44,894.50   | 58.40%    | 0      | 0 | 0  | 0.00%  |        |
| c(+)-Tiva2 | Heat shock cognate 71 kDa protein                                                                         | OS=Homo sapiens GN=HSPA8 PE=1 SV=1     | HSP7C_HUMAN               | 70,899.80   | 100.00%   | 5      | 6 | 6  | 9.91%  |        |
| c(+)-Tiva2 | A disintegrin and metalloproteinase with thrombospondin motifs 20                                         | OS=Homo sapiens GN=ADAMTS20 PE=2 SV=2  | ATS20_HUMAN               | 214,716.40  | 97.90%    | 1      | 1 | 1  | 0.73%  |        |
| c(+)-Tiva2 | Myosin light chain 6B                                                                                     | OS=Homo sapiens GN=MYL6B PE=1 SV=1     | MYL6B_HUMAN               | 22,764.10   | 80.80%    | 0      | 0 | 0  | 0.00%  |        |
| c(+)-Tiva2 | Mitotic spindle assembly checkpoint protein MAD1                                                          | OS=Homo sapiens GN=MAD1L1 PE=1 SV=2    | MD1L1_HUMAN               | 83,068.40   | 98.60%    | 1      | 1 | 1  | 3.62%  |        |
| c(+)-Tiva2 | Heterogeneous nuclear ribonucleoproteins C1/C2                                                            | OS=Homo sapiens GN=HNRNPC PE=1 SV=4    | HNRPC_HUMAN               | 33,670.50   | 99.10%    | 1      | 1 | 1  | 3.59%  |        |
| c(+)-Tiva2 | Transcription factor 7-like 1                                                                             | OS=Homo sapiens GN=TCF7L1 PE=2 SV=1    | TF7L1_HUMAN               | 62,631.40   | 0.00%     | 0      | 0 | 0  | 0.00%  |        |
| c(+)-Tiva2 | Probable phospholipid-transporting ATPase VA                                                              | OS=Homo sapiens GN=ATP10A PE=2 SV=2    | AT10A_HUMAN               | 167,691.40  | 79.50%    | 0      | 0 | 0  | 0.00%  |        |
| c(+)-Tiva2 | Contactin-1                                                                                               | OS=Homo sapiens GN=CNTN1 PE=1 SV=1     | CNTN1_HUMAN               | 113,322.80  | 100.00%   | 3      | 3 | 3  | 3.54%  |        |
| c(+)-Tiva2 | Sorbin and SH3 domain-containing protein 2                                                                | OS=Homo sapiens GN=SORBS2 PE=1 SV=3    | SRBS2_HUMAN               | 124,110.10  | 99.10%    | 1      | 1 | 2  | 2.18%  |        |
| c(+)-Tiva2 | Band 4.1-like protein 2                                                                                   | OS=Homo sapiens GN=EPB41L2 PE=1 SV=1   | E41L2_HUMAN               | 112,587.80  | 75.20%    | 0      | 0 | 0  | 0.00%  |        |
| c(+)-Tiva2 | Transcription initiation factor TFIID subunit 6                                                           | OS=Homo sapiens GN=TAIF6 PE=1 SV=1     | TAIF6_HUMAN               | 72,669.30   | 0.00%     | 0      | 0 | 0  | 0.00%  |        |
| c(+)-Tiva2 | Zinc finger protein 497                                                                                   | OS=Homo sapiens GN=ZNF497 PE=2 SV=2    | ZN497_HUMAN               | 54,719.40   | 84.60%    | 1      | 1 | 1  | 3.61%  |        |
| c(+)-Tiva2 | POTE ankyrin domain family member I                                                                       | OS=Homo sapiens GN=POTE1 PE=3 SV=1     | POTE1_HUMAN               | 121,285.00  | 100.00%   | 2      | 7 | 11 | 2.33%  |        |
| c(+)-Tiva2 | Transmembrane emp24 domain-containing protein 10                                                          | OS=Homo sapiens GN=TMED10 PE=1 SV=2    | TMEDA_HUMAN               | 24,977.50   | 0.00%     | 0      | 0 | 0  | 0.00%  |        |
| c(+)-Tiva2 | Mitotic checkpoint protein BUB3                                                                           | OS=Homo sapiens GN=BUB3 PE=1 SV=1      | BUB3_HUMAN                | 37,154.70   | 0.00%     | 0      | 0 | 0  | 0.00%  |        |
| c(+)-Tiva2 | ProSAP-interacting protein 1                                                                              | OS=Homo sapiens GN=PROSAP1 PE=2 SV=1   | PRIP1_HUMAN               | 71,791.30   | 0.00%     | 0      | 0 | 0  | 0.00%  |        |
| c(+)-Tiva2 | Putative 40S ribosomal protein S10-like                                                                   | OS=Homo sapiens GN=RP510P5 PE=5 SV=1   | RS10L_HUMAN               | 20,120.60   | 39.70%    | 0      | 0 | 0  | 0.00%  |        |
| c(+)-Tiva2 | APC membrane recruitment protein 1                                                                        | OS=Homo sapiens GN=FAM123B PE=1 SV=2   | AMER1_HUMAN               | 124,030.00  | 0.00%     | 0      | 0 | 0  | 0.00%  |        |
| c(+)-Tiva2 | Signal peptide, CUB and EGF-like domain-containing protein 1                                              | OS=Homo sapiens GN=SCUBE1 PE=1 SV=3    | SCUB1_HUMAN               | 107,908.10  | 73.60%    | 0      | 0 | 0  | 0.00%  |        |
| c(+)-Tiva2 | Lysine-specific demethylase 5B                                                                            | OS=Homo sapiens GN=KDM5B PE=1 SV=3     | KDM5B_HUMAN               | 175,660.20  | 47.10%    | 0      | 0 | 0  | 0.00%  |        |
| c(+)-Tiva2 | Ig kappa chain V-III region                                                                               | GOL                                    | OS=Homo sapiens PE=1 SV=1 | KV307_HUMAN | 11,830.80 | 89.20% | 1 | 1  | 1      | 14.70% |
| c(+)-Tiva2 | Piwi-like protein 3                                                                                       | OS=Homo sapiens GN=PIWIL3 PE=2 SV=2    | PIWL3_HUMAN               | 101,091.70  | 0.00%     | 0      | 0 | 0  | 0.00%  |        |
| c(+)-Tiva2 | Zinc finger protein 42 homolog                                                                            | OS=Homo sapiens GN=ZFP42 PE=1 SV=2     | ZFP42_HUMAN               | 34,802.50   | 47.00%    | 0      | 0 | 0  | 0.00%  |        |
| c(+)-Tiva2 | T-cell surface glycoprotein CD4                                                                           | OS=Homo sapiens GN=CD4 PE=1 SV=1       | CD4_HUMAN                 | 51,111.30   | 26.10%    | 0      | 0 | 0  | 0.00%  |        |
| c(+)-Tiva2 | Collophilin-4                                                                                             | OS=Homo sapiens GN=PKP4 PE=1 SV=2      | PKP4_HUMAN                | 131,869.60  | 99.90%    | 1      | 1 | 1  | 1.43%  |        |
| c(+)-Tiva2 | Coiled-coil domain-containing protein 171                                                                 | OS=Homo sapiens GN=CCDC171 PE=2 SV=1   | CC171_HUMAN               | 152,814.20  | 0.00%     | 0      | 0 | 0  | 0.00%  |        |
| c(+)-Tiva2 | Mucin-19                                                                                                  | OS=Homo sapiens GN=MUC19 PE=1 SV=2     | MUC19_HUMAN               | 598,136.40  | 35.70%    | 0      | 0 | 0  | 0.00%  |        |
| c(+)-Tiva2 | Brother of CDO                                                                                            | OS=Homo sapiens GN=BOC PE=1 SV=1       | BOC_HUMAN                 | 121,058.50  | 0.00%     | 0      | 0 | 0  | 0.00%  |        |
| c(+)-Tiva2 | Regulating synaptic membrane exocytosis protein 2                                                         | OS=Homo sapiens GN=RIMS2 PE=1 SV=2     | RIMS2_HUMAN               | 160,404.60  | 0.00%     | 0      | 0 | 0  | 0.00%  |        |
| c(+)-Tiva2 | Large neutral amino acids transporter small subunit 1                                                     | OS=Homo sapiens GN=SLC7A5 PE=1 SV=2    | LAT1_HUMAN                | 55,012.10   | 99.10%    | 1      | 1 | 1  | 3.16%  |        |
| c(+)-Tiva2 | Caskin-1                                                                                                  | OS=Homo sapiens GN=CASKIN1 PE=1 SV=1   | CSK1_HUMAN                | 149,815.20  | 77.90%    | 0      | 0 | 0  | 0.00%  |        |
| c(+)-Tiva2 | Synaptotagmin-1                                                                                           | OS=Homo sapiens GN=SYNJ1 PE=1 SV=2     | SYNJ1_HUMAN               | 173,106.90  | 97.30%    | 1      | 1 | 1  | 2.03%  |        |
| c(+)-Tiva2 | Ligand-dependent nuclear receptor corepressor-like protein                                                | OS=Homo sapiens GN=LCORL PE=2 SV=4     | LCORL_HUMAN               | 66,965.30   | 0.00%     | 0      | 0 | 0  | 0.00%  |        |
| c(+)-Tiva2 | Poly(rC)-binding protein 1                                                                                | OS=Homo sapiens GN=PCBP1 PE=1 SV=2     | PCBP1_HUMAN               | 37,498.20   | 0.00%     | 0      | 0 | 0  | 0.00%  |        |
| c(+)-Tiva2 | 5-hydroxytryptamine receptor 2A                                                                           | OS=Homo sapiens GN=HTR2A PE=1 SV=2     | 5HT2A_HUMAN               | 52,605.00   | 27.90%    | 0      | 0 | 0  | 0.00%  |        |
| c(+)-Tiva2 | 40S ribosomal protein S4, X isoform                                                                       | OS=Homo sapiens GN=RP54X PE=1 SV=2     | RS4X_HUMAN                | 29,599.30   | 90.80%    | 1      | 1 | 1  | 4.56%  |        |
| c(+)-Tiva2 | Probable phospholipid-transporting ATPase VB                                                              | OS=Homo sapiens GN=ATP10B PE=2 SV=2    | AT10B_HUMAN               | 165,394.90  | 93.30%    | 1      | 1 | 1  | 2.87%  |        |
| c(+)-Tiva2 | Cysteine/serine-rich nuclear protein 1                                                                    | OS=Homo sapiens GN=CSRN1 PE=2 SV=2     | CSRN1_HUMAN               | 63,508.70   | 62.50%    | 0      | 0 | 0  | 0.00%  |        |
| c(+)-Tiva2 | Ninein                                                                                                    | OS=Homo sapiens GN=NIN PE=1 SV=4       | NIN_HUMAN                 | 243,247.60  | 100.00%   | 2      | 2 | 2  | 2.44%  |        |
| c(+)-Tiva2 | Dynein heavy chain 1, axonemal                                                                            | OS=Homo sapiens GN=DNAH1 PE=1 SV=4     | DYH1_HUMAN                | 493,958.70  | 0.00%     | 0      | 0 | 0  | 0.00%  |        |
| c(+)-Tiva2 | SET and MYND domain-containing protein 4                                                                  | OS=Homo sapiens GN=SMYD4 PE=2 SV=3     | SMYD4_HUMAN               | 89,225.80   | 68.60%    | 0      | 0 | 0  | 0.00%  |        |
| c(+)-Tiva2 | Putative protein FAM200B                                                                                  | OS=Homo sapiens GN=FAM200B PE=5 SV=1   | F200B_HUMAN               | 76,037.10   | 0.00%     | 0      | 0 | 0  | 0.00%  |        |
| c(+)-Tiva2 | Protein KRBA1                                                                                             | OS=Homo sapiens GN=KRBA1 PE=2 SV=2     | KRBA1_HUMAN               | 107,511.70  | 0.00%     | 0      | 0 | 0  | 0.00%  |        |
| c(+)-Tiva2 | Tensin-1                                                                                                  | OS=Homo sapiens GN=TNIS1 PE=1 SV=2     | TENS1_HUMAN               | 185,701.40  | 0.00%     | 0      | 0 | 0  | 0.00%  |        |
| c(+)-Tiva2 | Signal recognition particle 54 kDa protein                                                                | OS=Homo sapiens GN=SRP54 PE=1 SV=1     | SRP54_HUMAN               | 55,706.30   | 0.00%     | 0      | 0 | 0  | 0.00%  |        |
| c(+)-Tiva2 | 1-phosphatidylinositol 4,5-bisphosphate phosphodiesterase eta-1                                           | OS=Homo sapiens GN=PLCH1 PE=1 SV=1     | PLCH1_HUMAN               | 189,225.90  | 0.00%     | 0      | 0 | 0  | 0.00%  |        |
| c(+)-Tiva2 | RPE-retinal G protein-coupled receptor                                                                    | OS=Homo sapiens GN=RGR PE=1 SV=1       | RGR_HUMAN                 | 31,875.40   | 96.00%    | 1      | 1 | 1  | 6.53%  |        |
| c(+)-Tiva2 | Protein cramped-like                                                                                      | OS=Homo sapiens GN=CRAMP1L PE=1 SV=3   | CRML_HUMAN                | 134,721.30  | 0.00%     | 0      | 0 | 0  | 0.00%  |        |
| c(+)-Tiva2 | Cleavage stimulation factor subunit 2                                                                     | OS=Homo sapiens GN=CSTF2 PE=1 SV=1     | CSTF2_HUMAN               | 60,959.10   | 99.10%    | 1      | 1 | 1  | 3.47%  |        |
| c(+)-Tiva2 | FYVE, RhoGEF and PH domain-containing protein 3                                                           | OS=Homo sapiens GN=FGD3 PE=1 SV=1      | FGD3_HUMAN                | 79,401.80   | 0.00%     | 0      | 0 | 0  | 0.00%  |        |
| c(+)-Tiva2 | ARF7 effector protein                                                                                     | OS=Homo sapiens GN=C11orf46 PE=1 SV=1  | AR7EP_HUMAN               | 29,338.20   | 0.00%     | 0      | 0 | 0  | 0.00%  |        |
| c(+)-Tiva2 | NEDD8-conjugating enzyme Ubc12                                                                            | OS=Homo sapiens GN=UBE2M PE=1 SV=1     | UBC12_HUMAN               | 20,900.90   | 99.10%    | 1      | 1 | 1  | 12.00% |        |
| c(+)-Tiva2 | 3-ketoacyl-CoA thiolase, peroxisomal                                                                      | OS=Homo sapiens GN=ACAA1 PE=1 SV=2     | THIK_HUMAN                | 44,292.10   | 70.20%    | 0      | 0 | 0  | 0.00%  |        |
| c(+)-Tiva2 | Signal peptide, CUB and EGF-like domain-containing protein 2                                              | OS=Homo sapiens GN=SCUBE2 PE=2 SV=2    | SCUB2_HUMAN               | 109,964.00  | 98.00%    | 1      | 1 | 1  | 3.80%  |        |
| c(+)-Tiva2 | Uncharacterized protein KIAA1109                                                                          | OS=Homo sapiens GN=KIAA1109 PE=1 SV=2  | K1109_HUMAN               | 555,481.70  | 100.00%   | 2      | 2 | 2  | 1.00%  |        |
| c(+)-Tiva2 | Synaptonemal complex protein 1                                                                            | OS=Homo sapiens GN=SYCP1 PE=1 SV=2     | SYCP1_HUMAN               | 114,196.20  | 99.10%    | 1      | 1 | 2  | 2.87%  |        |
| c(+)-Tiva2 | Nck-associated protein 1                                                                                  | OS=Homo sapiens GN=NCKAP1 PE=1 SV=1    | NCKP1_HUMAN               | 128,794.70  | 99.10%    | 1      | 1 | 1  | 2.84%  |        |
| c(+)-Tiva2 | F-box/WD repeat-containing protein 10                                                                     | OS=Homo sapiens GN=FBXW10 PE=2 SV=2    | FBW10_HUMAN               | 119,849.00  | 91.50%    | 1      | 1 | 1  | 3.04%  |        |
| c(+)-Tiva2 | Protocadherin gamma-A5                                                                                    | OS=Homo sapiens GN=PCDHGA5 PE=2 SV=1   | PCDG5_HUMAN               | 100,936.50  | 99.90%    | 1      | 1 | 1  | 2.58%  |        |
| c(+)-Tiva2 | Coiled-coil domain-containing protein 108                                                                 | OS=Homo sapiens GN=CCDC108 PE=2 SV=2   | CC108_HUMAN               | 217,250.90  | 64.90%    | 0      | 0 | 0  | 0.00%  |        |
| c(+)-Tiva2 | Voltage-dependent calcium channel subunit alpha-2/delta-1                                                 | OS=Homo sapiens GN=CACNA2D1 PE=1 SV=3  | CA2D1_HUMAN               | 124,572.10  | 94.30%    | 1      | 1 | 1  | 1.90%  |        |
| c(+)-Tiva2 | Peptidyl-prolyl cis-trans isomerase FKBP6                                                                 | OS=Homo sapiens GN=FKBP6 PE=1 SV=1     | FKBP6_HUMAN               | 37,215.60   | 0.00%     | 0      | 0 | 0  | 0.00%  |        |
| c(+)-Tiva2 | Myosin light chain kinase, smooth muscle                                                                  | OS=Homo sapiens GN=MYLK PE=1 SV=4      | MYLK_HUMAN                | 210,713.00  | 0.00%     | 0      | 0 | 0  | 0.00%  |        |
| c(+)-Tiva2 | Upoamide acyltransferase component of branched-chain alpha-keto acid dehydrogenase complex, mitochondrial | OS=Homo sapiens GN=OBD2 PE=1 SV=1      | OBD2_HUMAN                | 53,488.50   | 28.00%    | 0      | 0 | 0  | 0.00%  |        |
| c(+)-Tiva2 | 60S acidic ribosomal protein P0-like                                                                      | OS=Homo sapiens GN=RPLP0P6 PE=5 SV=1   | RAL0L_HUMAN               | 34,365.10   | 100.00%   | 2      | 2 | 2  | 6.62%  |        |
| c(+)-Tiva2 | Heterogeneous nuclear ribonucleoprotein A1-like 2                                                         | OS=Homo sapiens GN=HNRNPA1L2 PE=2 SV=2 | RA1L2_HUMAN               | 34,225.40   | 95.30%    | 1      | 1 | 1  | 5.31%  |        |
| c(+)-Tiva2 | Prolow-density lipoprotein receptor-related protein 1                                                     | OS=Homo sapiens GN=LRP1 PE=1 SV=2      | LRP1_HUMAN                | 504,591.80  | 0.00%     | 0      | 0 | 0  | 0.00%  |        |
| c(+)-Tiva2 | Rho guanine nucleotide exchange factor 10                                                                 | OS=Homo sapiens GN=ARHGEF10 PE=1 SV=4  | ARHGA_HUMAN               | 151,612.50  | 57.30%    | 0      | 0 | 0  | 0.00%  |        |
| c(+)-Tiva2 | Transcription termination factor 2                                                                        | OS=Homo sapiens GN=TTF2 PE=1 SV=2      | TTF2_HUMAN                | 129,589.80  | 72.40%    | 0      | 0 | 0  | 0.00%  |        |
| c(+)-Tiva2 | Sodium channel protein type 8 subunit alpha                                                               | OS=Homo sapiens GN=SCN8A PE=1 SV=1     | SCN8A_HUMAN               | 225,289.30  | 0.00%     | 0      | 0 | 0  | 0.00%  |        |
| c(+)-Tiva2 | DnaI homolog subfamily B member 13                                                                        | OS=Homo sapiens GN=DNAIB13 PE=2 SV=1   | DB13_HUMAN                | 36,120.30   | 98.70%    | 1      | 1 | 1  | 5.06%  |        |









|            |                                                                            |                         |             |      |      |              |            |         |    |     |     |        |
|------------|----------------------------------------------------------------------------|-------------------------|-------------|------|------|--------------|------------|---------|----|-----|-----|--------|
| c(+)-Tiva2 | Calcium-binding protein p22                                                | OS=Homo sapiens         | GN=CHP      | PE=1 | SV=3 | CHP1_HUMAN   | 22,457.20  | 0.00%   | 0  | 0   | 0   | 0.00%  |
| c(+)-Tiva2 | Serine/threonine-protein phosphatase 6 regulatory ankyrin repeat subunit C | OS=Homo sapiens         | GN=ANKRD52  | PE=1 | SV=3 | ANKR52_HUMAN | 115,078.90 | 0.00%   | 0  | 0   | 0   | 0.00%  |
| c(+)-Tiva2 | TRMT1-like protein                                                         | OS=Homo sapiens         | GN=TRMT1L   | PE=1 | SV=2 | TRM1L_HUMAN  | 81,748.40  | 0.00%   | 0  | 0   | 0   | 0.00%  |
| c(+)-Tiva2 | Poly [ADP-ribose] polymerase 2                                             | OS=Homo sapiens         | GN=PARP2    | PE=1 | SV=2 | PARP2_HUMAN  | 66,207.80  | 89.10%  | 1  | 1   | 1   | 2.74%  |
| c(+)-Tiva2 | Uncharacterized protein C11orf95                                           | OS=Homo sapiens         | GN=C11orf95 | PE=2 | SV=1 | CK095_HUMAN  | 73,197.90  | 0.00%   | 0  | 0   | 0   | 0.00%  |
| c(+)-Tiva2 | Zinc finger protein 197                                                    | OS=Homo sapiens         | GN=ZNF197   | PE=2 | SV=1 | ZN197_HUMAN  | 118,848.00 | 25.60%  | 0  | 0   | 0   | 0.00%  |
| c(+)-Tiva2 | Uncharacterized protein C2orf54                                            | OS=Homo sapiens         | GN=C2orf54  | PE=1 | SV=2 | CB054_HUMAN  | 49,565.70  | 91.40%  | 1  | 1   | 1   | 3.80%  |
| c(+)-Tiva2 | Zinc finger protein 236                                                    | OS=Homo sapiens         | GN=ZNF236   | PE=2 | SV=2 | ZN236_HUMAN  | 203,699.60 | 86.10%  | 1  | 1   | 1   | 1.03%  |
| c(+)-Tiva2 | Plakophilin-2                                                              | OS=Homo sapiens         | GN=PKP2     | PE=1 | SV=2 | PKP2_HUMAN   | 97,416.50  | 0.00%   | 0  | 0   | 0   | 0.00%  |
| c(+)-Tiva2 | Actin-binding LIM protein 2                                                | OS=Homo sapiens         | GN=ABUM2    | PE=1 | SV=2 | ABLM2_HUMAN  | 67,813.40  | 0.00%   | 0  | 0   | 0   | 0.00%  |
| c(+)-Tiva2 | Aurora kinase A                                                            | OS=Homo sapiens         | GN=AURKA    | PE=1 | SV=2 | AURKA_HUMAN  | 45,809.80  | 93.10%  | 1  | 1   | 1   | 5.46%  |
| c(+)-Tiva2 | Transcription factor COE4                                                  | OS=Homo sapiens         | GN=EBF4     | PE=2 | SV=2 | COE4_HUMAN   | 64,473.80  | 96.60%  | 1  | 1   | 1   | 3.49%  |
| c(+)-Tiva2 | Kinesin-like protein KIF20B                                                | OS=Homo sapiens         | GN=KIF20B   | PE=1 | SV=3 | KI20B_HUMAN  | 210,636.00 | 99.90%  | 1  | 1   | 1   | 1.70%  |
| c(+)-Tiva2 | Ninein-like protein                                                        | OS=Homo sapiens         | GN=NINL     | PE=1 | SV=2 | NINL_HUMAN   | 156,343.30 | 0.00%   | 0  | 0   | 0   | 0.00%  |
| c(+)-Tiva2 | M-phase inducer phosphatase 2                                              | OS=Homo sapiens         | GN=CDK25B   | PE=1 | SV=2 | MPIP2_HUMAN  | 64,989.20  | 83.80%  | 1  | 1   | 1   | 4.31%  |
| c(+)-Tiva2 | Unconventional myosin-XV                                                   | OS=Homo sapiens         | GN=MYO15A   | PE=1 | SV=2 | MYO15_HUMAN  | 395,295.80 | 71.10%  | 0  | 0   | 0   | 0.00%  |
| c(+)-Tiva2 | Protein AKNAD1                                                             | OS=Homo sapiens         | GN=AKNAD1   | PE=2 | SV=3 | AKND1_HUMAN  | 92,866.50  | 41.80%  | 0  | 0   | 0   | 0.00%  |
| c(+)-Tiva2 | Zinc finger protein 318                                                    | OS=Homo sapiens         | GN=ZNF318   | PE=1 | SV=2 | ZN318_HUMAN  | 251,116.00 | 0.00%   | 0  | 0   | 0   | 0.00%  |
| c(+)-Tiva2 | Protein NOXP20                                                             | OS=Homo sapiens         | GN=FAM114A1 | PE=1 | SV=2 | NXP20_HUMAN  | 60,741.70  | 94.10%  | 1  | 1   | 1   | 3.02%  |
| c(+)-Tiva2 | UIM domain only protein 7                                                  | OS=Homo sapiens         | GN=LMO7     | PE=1 | SV=3 | LMO7_HUMAN   | 192,699.40 | 100.00% | 1  | 1   | 1   | 0.83%  |
| c(+)-Tiva2 | Trinucleotide repeat-containing gene 6B                                    | protein OS=Homo sapiens | GN=TNRC6B   | PE=1 | SV=4 | TNR6B_HUMAN  | 194,000.60 | 99.10%  | 1  | 1   | 1   | 1.91%  |
| c(+)-Tiva2 | Protein dopey-2                                                            | OS=Homo sapiens         | GN=DOPEY2   | PE=1 | SV=5 | DOP2_HUMAN   | 258,236.70 | 0.00%   | 0  | 0   | 0   | 0.00%  |
| c(+)-Tiva2 | CCR4-NOT transcription complex subunit 10                                  | OS=Homo sapiens         | GN=CNOT10   | PE=1 | SV=1 | CNOTA_HUMAN  | 82,311.90  | 25.50%  | 0  | 0   | 0   | 0.00%  |
| c(+)-Tiva2 | 1-phosphatidylinositol 3-phosphate 5-kinase                                | OS=Homo sapiens         | GN=PIKFYVE  | PE=1 | SV=3 | FYV1_HUMAN   | 237,139.60 | 26.30%  | 0  | 0   | 0   | 0.00%  |
| c(+)-Tiva2 | Heat shock protein beta-1                                                  | OS=Homo sapiens         | GN=HSPB1    | PE=1 | SV=2 | HSPB1_HUMAN  | 22,782.60  | 99.10%  | 1  | 1   | 1   | 18.50% |
| c(+)-Tiva2 | Transcription factor SOX-11                                                | OS=Homo sapiens         | GN=SOX11    | PE=1 | SV=2 | SOX11_HUMAN  | 46,680.80  | 0.00%   | 0  | 0   | 0   | 0.00%  |
| c(+)-Tiva2 | Septin-10                                                                  | OS=Homo sapiens         | GN=SEPT10   | PE=1 | SV=2 | SEP10_HUMAN  | 52,593.50  | 99.10%  | 1  | 1   | 1   | 2.64%  |
| c(+)-Tiva2 | Putative endoplasmic-like protein                                          | OS=Homo sapiens         | GN=HSP90B2P | PE=5 | SV=1 | ENPLL_HUMAN  | 45,859.70  | 99.90%  | 1  | 1   | 1   | 2.51%  |
| c(+)-Tiva2 | Metabotropic glutamate receptor 2                                          | OS=Homo sapiens         | GN=GRM2     | PE=2 | SV=2 | GRM2_HUMAN   | 95,569.20  | 0.00%   | 0  | 0   | 0   | 0.00%  |
| c(+)-Tiva2 | ATP-dependent RNA helicase DDX3X                                           | OS=Homo sapiens         | GN=DDX3X    | PE=1 | SV=3 | DDX3X_HUMAN  | 73,245.80  | 99.90%  | 1  | 1   | 1   | 1.81%  |
| c(+)-Tiva2 | Otogelin-like protein                                                      | OS=Homo sapiens         | GN=OTOG     | PE=2 | SV=4 | OTOG_L_HUMAN | 80,513.20  | 94.90%  | 1  | 1   | 1   | 3.95%  |
| c(+)-Tiva2 | POU domain, class 3, transcription factor 2                                | OS=Homo sapiens         | GN=POU3F2   | PE=1 | SV=4 | PO3F2_HUMAN  | 46,891.20  | 99.10%  | 1  | 1   | 1   | 4.29%  |
| c(+)-Tiva2 | Band 4.1-like protein 1                                                    | OS=Homo sapiens         | GN=EPB41L1  | PE=1 | SV=2 | E41L1_HUMAN  | 98,505.30  | 0.00%   | 0  | 0   | 0   | 0.00%  |
| c(+)-Tiva2 | Ubiquitin-conjugating enzyme E2                                            | OS=Homo sapiens         | GN=UBE2O    | PE=1 | SV=3 | UBE2O_HUMAN  | 141,293.50 | 0.00%   | 0  | 0   | 0   | 0.00%  |
| c(+)-Tiva2 | Histamine H3 receptor                                                      | OS=Homo sapiens         | GN=HRH3     | PE=1 | SV=2 | HRH3_HUMAN   | 48,672.60  | 0.00%   | 0  | 0   | 0   | 0.00%  |
| c(+)-Tiva2 | Cyclin-dependent kinase 4                                                  | OS=Homo sapiens         | GN=CDK4     | PE=1 | SV=2 | CDK4_HUMAN   | 33,730.10  | 0.00%   | 0  | 0   | 0   | 0.00%  |
| c(+)-Tiva2 | Group 3 secretory phospholipase A2                                         | OS=Homo sapiens         | GN=PLA2G3   | PE=1 | SV=2 | PA2G3_HUMAN  | 57,166.80  | 91.10%  | 1  | 1   | 1   | 2.75%  |
| c(+)-Tiva2 | Ankyrin repeat domain-containing protein 60                                | OS=Homo sapiens         | GN=ANKRD60  | PE=2 | SV=3 | ANKR60_HUMAN | 37,630.40  | 88.60%  | 1  | 1   | 1   | 5.22%  |
| c(+)-Tiva2 | Uncharacterized protein C18orf25                                           | OS=Homo sapiens         | GN=C18orf25 | PE=1 | SV=2 | CR025_HUMAN  | 43,322.90  | 0.00%   | 0  | 0   | 0   | 0.00%  |
| c(+)-Tiva2 | tRNA (guanine[26]-N[2])-dimethyltransferase                                | OS=Homo sapiens         | GN=TRMT1    | PE=1 | SV=1 | TRM1_HUMAN   | 72,233.30  | 0.00%   | 0  | 0   | 0   | 0.00%  |
| c(+)-Tiva2 | Breast cancer metastasis-suppressor 1                                      | OS=Homo sapiens         | GN=BRMS1    | PE=1 | SV=1 | BRMS1_HUMAN  | 28,461.40  | 88.60%  | 1  | 1   | 1   | 8.54%  |
| c(+)-Tiva2 | Nebulin                                                                    | OS=Homo sapiens         | GN=NEB      | PE=1 | SV=4 | NEBU_HUMAN   | 772,942.60 | 0.00%   | 0  | 0   | 0   | 0.00%  |
| c(+)-Tiva2 | Putative L-type amino acid transporter 1-like protein                      | IMAA OS=Homo sapiens    | GN=SLC7A5P2 | PE=5 | SV=2 | LAT1L_HUMAN  | 19,840.60  | 88.30%  | 1  | 1   | 1   | 12.10% |
| c(+)-Tiva2 | Protein RRP5 homolog                                                       | OS=Homo sapiens         | GN=PDCD11   | PE=1 | SV=3 | RRP5_HUMAN   | 208,702.80 | 0.00%   | 0  | 0   | 0   | 0.00%  |
| c(+)-Tiva2 | Small subunit processome component 20                                      | homolog OS=Homo sapiens | GN=UTP20    | PE=1 | SV=3 | UTP20_HUMAN  | 318,395.60 | 24.50%  | 0  | 0   | 0   | 0.00%  |
| c(+)-Tiva2 | Leucyl-cystinyl aminopeptidase                                             | OS=Homo sapiens         | GN=LNPEP    | PE=1 | SV=3 | LCAP_HUMAN   | 117,353.20 | 0.00%   | 0  | 0   | 0   | 0.00%  |
| c(+)-Tiva2 | Nuclear RNA helicase 2                                                     | OS=Homo sapiens         | GN=DDX21    | PE=1 | SV=5 | DDX21_HUMAN  | 87,346.00  | 0.00%   | 0  | 0   | 0   | 0.00%  |
| c(+)-Tiva2 | Sterile alpha motif domain-containing protein 9-like                       | OS=Homo sapiens         | GN=SAMD9L   | PE=1 | SV=2 | SAM9L_HUMAN  | 184,540.80 | 0.00%   | 0  | 0   | 0   | 0.00%  |
| c(+)-Tiva2 | Endothelial lipase                                                         | OS=Homo sapiens         | GN=LIPG     | PE=1 | SV=1 | LIPE_HUMAN   | 56,795.40  | 0.00%   | 0  | 0   | 0   | 0.00%  |
| c(+)-Tiva2 | Phosphoribosylformylglycinamide synthase                                   | OS=Homo sapiens         | GN=PFAS     | PE=1 | SV=4 | PUR4_HUMAN   | 144,733.80 | 90.90%  | 1  | 1   | 1   | 0.60%  |
| c(+)-Tiva2 | B-cell CLL/lymphoma 9 protein                                              | OS=Homo sapiens         | GN=BCL9     | PE=1 | SV=4 | BCL9_HUMAN   | 149,290.40 | 29.40%  | 0  | 0   | 0   | 0.00%  |
| c(+)-Tiva2 | Guanine nucleotide-binding protein subunit alpha-14                        | OS=Homo sapiens         | GN=GNAI4    | PE=2 | SV=1 | GNAI4_HUMAN  | 41,572.10  | 97.30%  | 1  | 1   | 1   | 5.35%  |
| c(+)-Tiva2 | Annexin A1                                                                 | OS=Homo sapiens         | GN=ANXA1    | PE=1 | SV=2 | ANXA1_HUMAN  | 38,715.90  | 100.00% | 1  | 1   | 1   | 3.47%  |
| c(+)-Tiva2 | Glycosyltransferase-like protein LARGE1                                    | OS=Homo sapiens         | GN=LARGE    | PE=1 | SV=1 | LARGE_HUMAN  | 88,068.30  | 0.00%   | 0  | 0   | 0   | 0.00%  |
| c(+)-Tiva2 | PH-interacting protein                                                     | OS=Homo sapiens         | GN=PHIP     | PE=1 | SV=2 | PHIP_HUMAN   | 206,692.20 | 0.00%   | 0  | 0   | 0   | 0.00%  |
| c(+)-Tiva2 | Retinoblastoma-binding protein 5                                           | OS=Homo sapiens         | GN=RBBP5    | PE=1 | SV=2 | RBBP5_HUMAN  | 59,153.60  | 85.80%  | 1  | 1   | 1   | 5.39%  |
| c(+)-Tiva2 | ADAMTS-like protein 5                                                      | OS=Homo sapiens         | GN=ADAMTSL5 | PE=1 | SV=2 | ATL5_HUMAN   | 52,045.20  | 87.90%  | 1  | 1   | 1   | 3.82%  |
| c(+)-Tiva2 | Peptidyl-prolyl cis-trans isomerase FKBP4                                  | OS=Homo sapiens         | GN=FKBP4    | PE=1 | SV=3 | FKBP4_HUMAN  | 51,805.90  | 0.00%   | 0  | 0   | 0   | 0.00%  |
| c(+)-Tiva2 | Uncharacterized protein KIAA1671                                           | OS=Homo sapiens         | GN=KIAA1671 | PE=1 | SV=2 | KI671_HUMAN  | 196,711.40 | 86.00%  | 1  | 1   | 1   | 1.77%  |
| c(+)-Tiva2 | PGAP2-interacting protein                                                  | OS=Homo sapiens         | GN=CWH43    | PE=2 | SV=2 | PG2IP_HUMAN  | 78,588.00  | 0.00%   | 0  | 0   | 0   | 0.00%  |
| c(+)-Tiva2 | Glutamine-tRNA ligase                                                      | OS=Homo sapiens         | GN=QARS     | PE=1 | SV=1 | SYQ_HUMAN    | 87,799.90  | 0.00%   | 0  | 0   | 0   | 0.00%  |
| c(+)-Tiva2 | Ras GTPase-activating protein nGAP                                         | OS=Homo sapiens         | GN=RASAL2   | PE=1 | SV=2 | NGAP_HUMAN   | 128,560.60 | 0.00%   | 0  | 0   | 0   | 0.00%  |
| c(+)-Tiva2 | Schlafen family member 12                                                  | OS=Homo sapiens         | GN=SLFN12   | PE=1 | SV=2 | SLN12_HUMAN  | 66,975.40  | 79.60%  | 0  | 0   | 0   | 0.00%  |
| c(+)-Tiva2 | Protein FAM83C                                                             | OS=Homo sapiens         | GN=FAM83C   | PE=1 | SV=3 | FAB83_HUMAN  | 81,079.70  | 0.00%   | 0  | 0   | 0   | 0.00%  |
| c(+)-Tiva2 | DNA repair protein XRCC3                                                   | OS=Homo sapiens         | GN=XRCC3    | PE=1 | SV=1 | XRCC3_HUMAN  | 37,850.50  | 97.40%  | 1  | 1   | 1   | 3.18%  |
| c(+)-Tiva2 | Perforin-1                                                                 | OS=Homo sapiens         | GN=PRF1     | PE=1 | SV=1 | PERF_HUMAN   | 61,376.90  | 0.00%   | 0  | 0   | 0   | 0.00%  |
| c(+)-Tiva2 | Ribulose-phosphate 3-epimerase                                             | OS=Homo sapiens         | GN=RPE      | PE=1 | SV=1 | RPE_HUMAN    | 24,927.80  | 97.80%  | 1  | 1   | 1   | 9.65%  |
| c(+)-Tiva2 | GTP-binding protein Rhes                                                   | OS=Homo sapiens         | GN=RASD2    | PE=1 | SV=1 | RHES_HUMAN   | 30,366.50  | 0.00%   | 0  | 0   | 0   | 0.00%  |
| c(+)-Tiva2 | Mdm2-binding protein                                                       | OS=Homo sapiens         | GN=MTBP     | PE=1 | SV=1 | MTBP_HUMAN   | 102,196.80 | 99.10%  | 1  | 1   | 1   | 1.66%  |
| c(+)-Tiva2 | Complement component 1 Q subcomponent-binding protein, mitochondrial       | OS=Homo sapiens         | GN=C1QB     | PE=1 | SV=1 | C1QB_P_HUMAN | 31,362.60  | 100.00% | 2  | 2   | 2   | 12.10% |
| c(+)-Tiva2 | Isetlet cell autoantigen 1-like protein                                    | OS=Homo sapiens         | GN=ICAIL    | PE=2 | SV=1 | ICAIL_HUMAN  | 54,407.90  | 0.00%   | 0  | 0   | 0   | 0.00%  |
| c(+)-Tiva2 | Transmembrane protein 5                                                    | OS=Homo sapiens         | GN=TMEM5    | PE=2 | SV=1 | TMEM5_HUMAN  | 51,147.00  | 0.00%   | 0  | 0   | 0   | 0.00%  |
| c(+)-Tiva2 | Putative unconventional myosin-XVB                                         | OS=Homo sapiens         | GN=MYO15B   | PE=5 | SV=2 | MY15B_HUMAN  | 167,118.90 | 24.80%  | 0  | 0   | 0   | 0.00%  |
| c(+)-Tiva2 | Forkhead box protein L1                                                    | OS=Homo sapiens         | GN=FOXL1    | PE=2 | SV=2 | FOX1L_HUMAN  | 36,491.90  | 87.70%  | 1  | 1   | 1   | 6.09%  |
| c(+)-Tiva2 | Puromycin-sensitive aminopeptidase-like protein                            | OS=Homo sapiens         | GN=NPEPPSL1 | PE=2 | SV=3 | PSAL_HUMAN   | 53,748.30  | 95.80%  | 1  | 1   | 1   | 2.93%  |
| c(+)-Tiva2 | Propionyl-CoA carboxylase alpha chain, mitochondrial                       | OS=Homo sapiens         | GN=PCCA     | PE=1 | SV=4 | PCCA_HUMAN   | 80,059.30  | 0.00%   | 0  | 0   | 0   | 0.00%  |
| c(+)-Tiva2 | Peroxisomal targeting signal 1 receptor                                    | OS=Homo sapiens         | GN=PEX5     | PE=1 | SV=3 | PEX5_HUMAN   | 70,865.90  | 0.00%   | 0  | 0   | 0   | 0.00%  |
| c(+)-Tiva2 | Zinc finger protein 286A                                                   | OS=Homo sapiens         | GN=ZNF286A  | PE=2 | SV=1 | Z286A_HUMAN  | 60,173.80  | 0.00%   | 0  | 0   | 0   | 0.00%  |
| c(+)-Tiva2 | Collagen alpha-6(VI) chain                                                 | OS=Homo sapiens         | GN=COL6A6   | PE=1 | SV=2 | CO6A6_HUMAN  | 247,177.50 | 99.10%  | 1  | 1   | 1   | 0.97%  |
| c(+)-Tiva2 | Regulator of G-protein signalling 12                                       | OS=Homo sapiens         | GN=RGSI2    | PE=1 | SV=1 | RGSI2_HUMAN  | 156,359.40 | 0.00%   | 0  | 0   | 0   | 0.00%  |
| c(+)-Tiva2 | Protein phosphatase 1 regulatory subunit 12A                               | OS=Homo sapiens         | GN=PPP1R12A | PE=1 | SV=1 | MYPT1_HUMAN  | 115,283.40 | 0.00%   | 0  | 0   | 0   | 0.00%  |
| c(+)-Tiva2 | Zinc finger protein 208                                                    | OS=Homo sapiens         | GN=ZNF208   | PE=2 | SV=1 | ZN208_HUMAN  | 134,355.20 | 99.10%  | 1  | 1   | 1   | 0.94%  |
| c(+)-Tiva2 | Engulfment and cell motility protein 3                                     | OS=Homo sapiens         | GN=ELMO3    | PE=1 | SV=3 | ELMO3_HUMAN  | 81,469.90  | 0.00%   | 0  | 0   | 0   | 0.00%  |
| c(+)-Tiva2 | FRAS1-related extracellular matrix protein 2                               | OS=Homo sapiens         | GN=FREM2    | PE=1 | SV=2 | FREM2_HUMAN  | 351,154.80 | 99.10%  | 1  | 1   | 1   | 0.88%  |
| c(+)-Tiva2 | Transgelin-2                                                               | OS=Homo sapiens         | GN=TAGLN2   | PE=1 | SV=3 | TAGL2_HUMAN  | 22,391.90  | 99.10%  | 1  | 1   | 1   | 9.55%  |
| c(+)-Tiva2 | Regulatory-associated protein of mTOR                                      | OS=Homo sapiens         | GN=RPTOR    | PE=1 | SV=1 | RPTOR_HUMAN  | 149,039.20 | 0.00%   | 0  | 0   | 0   | 0.00%  |
| c(+)-Tiva2 | Indian hedgehog protein                                                    | OS=Homo sapiens         | GN=IHH      | PE=1 | SV=4 | IHH_HUMAN    | 45,250.60  | 86.40%  | 1  | 1   | 1   | 4.38%  |
| c(+)-Tiva2 | Myosin-9                                                                   | OS=Homo sapiens         | GN=MYH9     | PE=1 | SV=4 | MYH9_HUMAN   | 226,537.50 | 100.00% | 92 | 124 | 151 | 49.40% |
| c(+)-Tiva2 | 60S ribosomal protein L23                                                  | OS=Homo sapiens         | GN=RPL23    | PE=1 | SV=1 | RL23_HUMAN   | 14,865.90  | 99.10%  | 1  | 1   | 1   | 10.70% |
| c(+)-Tiva2 | Ribosome biogenesis protein BMS1 homolog                                   | OS=Homo sapiens         | GN=BMS1     | PE=1 | SV=1 | BMS1_HUMAN   | 145,812.20 | 63.70%  | 0  | 0   | 0   | 0.00%  |
| c(+)-Tiva2 | SET and MYND domain-containing protein 3                                   | OS=Homo sapiens         | GN=SMYD3    | PE=1 | SV=4 | SMYD3_HUMAN  | 49,098.10  | 0.00%   | 0  | 0   | 0   | 0.00%  |
| c(+)-Tiva2 | Leukocyte receptor cluster member 9                                        | OS=Homo sapiens         | GN=LENG9    | PE=2 | SV=2 | LENG9_HUMAN  | 53,166.60  | 60.20%  | 0  | 0   | 0   | 0.00%  |
| c(+)-Tiva2 | Probable E3 ubiquitin-protein ligase C12orf51                              | OS=Homo sapiens         | GN=C12orf51 | PE=1 | SV=5 | K0614_HUMAN  | 439,345.20 | 0.00%   | 0  | 0   | 0   | 0.00%  |
| c(+)-Tiva2 | Mitogen-activated protein kinase kinase kinase 4                           | OS=Homo sapiens         | GN=MAP3K4   | PE=1 | SV=2 | M3K4_HUMAN   | 181,689.30 | 0.00%   | 0  | 0   | 0   | 0.00%  |
| c(+)-Tiva2 | Zinc finger protein 28 homolog                                             | OS=Homo sapiens         | GN=ZFP28    | PE=1 | SV=1 | ZFP28_HUMAN  | 98,705.00  | 0.00%   | 0  | 0   | 0   | 0.00%  |
| c(+)-Tiva2 | Olfactory receptor 56A4                                                    | OS=Homo sapiens         | GN=OR56A4   | PE=2 | SV=2 | O56A4_HUMAN  | 35,118.30  | 99.10%  | 1  | 1   | 1   | 10.20% |
| c(+)-Tiva2 | NACHT, LRR and PYD domains-containing protein 4                            | OS=Homo sapiens         | GN=NLRP4    | PE=1 | SV=3 | NALP4_HUMAN  | 113,418.60 | 0.00%   | 0  | 0   | 0   | 0.00%  |
| c(+)-Tiva2 | Zinc finger and SCAN domain-containing protein 5A                          | OS=H                    |             |      |      |              |            |         |    |     |     |        |



|            |                                                                                                              |              |            |         |   |   |   |        |
|------------|--------------------------------------------------------------------------------------------------------------|--------------|------------|---------|---|---|---|--------|
| c(+)-Tiva2 | Ryanodine receptor 3 OS=Homo sapiens GN=RYP3 PE=1 SV=3                                                       | RYR3_HUMAN   | 552,044.40 | 99.00%  | 0 | 0 | 0 | 0.00%  |
| c(+)-Tiva2 | Large neutral amino acids transporter small subunit 4 OS=Homo sapiens GN=SLC43A2 PE=1 SV=1                   | LAT4_HUMAN   | 62,749.30  | 99.10%  | 1 | 1 | 1 | 3.87%  |
| c(+)-Tiva2 | B-cell lymphoma/leukemia 11B OS=Homo sapiens GN=BC11B PE=1 SV=1                                              | BC11B_HUMAN  | 95,521.10  | 83.60%  | 1 | 1 | 1 | 4.92%  |
| c(+)-Tiva2 | Poly(A) polymerase beta OS=Homo sapiens GN=PAP0B PE=2 SV=1                                                   | PAP0B_HUMAN  | 71,683.10  | 0.00%   | 0 | 0 | 0 | 0.00%  |
| c(+)-Tiva2 | Transforming growth factor beta-2 OS=Homo sapiens GN=TFGB2 PE=1 SV=1                                         | TFGB2_HUMAN  | 47,749.40  | 0.00%   | 0 | 0 | 0 | 0.00%  |
| c(+)-Tiva2 | 40S ribosomal protein S19 OS=Homo sapiens GN=RPS19 PE=1 SV=2                                                 | RS19_HUMAN   | 16,060.50  | 99.10%  | 1 | 1 | 1 | 6.90%  |
| c(+)-Tiva2 | OTU domain-containing protein 3 OS=Homo sapiens GN=OTUD3 PE=1 SV=1                                           | OTUD3_HUMAN  | 45,124.10  | 24.80%  | 0 | 0 | 0 | 0.00%  |
| c(+)-Tiva2 | Uncharacterized protein C6orf10 OS=Homo sapiens GN=C6orf10 PE=1 SV=3                                         | CF010_HUMAN  | 61,626.60  | 0.00%   | 0 | 0 | 0 | 0.00%  |
| c(+)-Tiva2 | Glycoprotein endo-alpha-1,2-mannosidase OS=Homo sapiens GN=MANEA PE=1 SV=1                                   | MANEA_HUMAN  | 53,673.90  | 88.60%  | 1 | 1 | 1 | 4.33%  |
| c(+)-Tiva2 | 15 kDa selenoprotein OS=Homo sapiens GN=SEP15 PE=1 SV=3                                                      | SEP15_HUMAN  | 17,791.00  | 0.00%   | 0 | 0 | 0 | 0.00%  |
| c(+)-Tiva2 | Stress-70 protein, mitochondrial OS=Homo sapiens GN=HSPA9 PE=1 SV=2                                          | GRP75_HUMAN  | 73,681.30  | 100.00% | 1 | 1 | 1 | 1.77%  |
| c(+)-Tiva2 | SET domain-containing protein 5 OS=Homo sapiens GN=SETD5 PE=1 SV=2                                           | SETD5_HUMAN  | 157,515.40 | 0.00%   | 0 | 0 | 0 | 0.00%  |
| c(+)-Tiva2 | Lupus La protein OS=Homo sapiens GN=SSB PE=1 SV=2                                                            | LA_HUMAN     | 46,839.00  | 99.10%  | 1 | 1 | 1 | 4.66%  |
| c(+)-Tiva2 | Cutaneous T-cell lymphoma-associated antigen 5 OS=Homo sapiens GN=CTAGE5 PE=1 SV=4                           | CTGE5_HUMAN  | 90,999.50  | 93.40%  | 1 | 1 | 1 | 2.24%  |
| c(+)-Tiva2 | Protein phosphatase Slingshot homolog 1 OS=Homo sapiens GN=SSH1 PE=1 SV=2                                    | SSH1_HUMAN   | 115,514.20 | 88.60%  | 1 | 1 | 1 | 1.53%  |
| c(+)-Tiva2 | Tubulin beta-2A chain OS=Homo sapiens GN=TUBB2A PE=1 SV=1                                                    | TBB2A_HUMAN  | 49,907.10  | 100.00% | 6 | 7 | 7 | 18.20% |
| c(+)-Tiva2 | Zinc finger protein 469 OS=Homo sapiens GN=ZNF469 PE=1 SV=3                                                  | ZN469_HUMAN  | 410,201.70 | 0.00%   | 0 | 0 | 0 | 0.00%  |
| c(+)-Tiva2 | Sorting nexin-4 OS=Homo sapiens GN=SNX4 PE=1 SV=1                                                            | SNX4_HUMAN   | 51,909.80  | 0.00%   | 0 | 0 | 0 | 0.00%  |
| c(+)-Tiva2 | Olfactory receptor 13C4 OS=Homo sapiens GN=OR13C4 PE=2 SV=1                                                  | O13C4_HUMAN  | 35,577.80  | 97.60%  | 1 | 1 | 1 | 10.10% |
| c(+)-Tiva2 | Prostaglandin synthase OS=Homo sapiens GN=PTGIS PE=1 SV=1                                                    | PTGIS_HUMAN  | 57,106.60  | 0.00%   | 0 | 0 | 0 | 0.00%  |
| c(+)-Tiva2 | Fanconi anemia group M protein OS=Homo sapiens GN=FANCM PE=1 SV=2                                            | FANCM_HUMAN  | 232,194.70 | 85.70%  | 1 | 1 | 1 | 0.88%  |
| c(+)-Tiva2 | Voltage-dependent P/Q-type calcium channel subunit alpha-1A OS=Homo sapiens GN=CACNA1A PE=1 SV=2             | CAC1A_HUMAN  | 282,370.90 | 69.80%  | 0 | 0 | 0 | 0.00%  |
| c(+)-Tiva2 | Collase-like protein 2 OS=Homo sapiens GN=CLPSL2 PE=1 SV=3                                                   | COLL2_HUMAN  | 10,812.30  | 0.00%   | 0 | 0 | 0 | 0.00%  |
| c(+)-Tiva2 | tRNA wybutosine-synthesizing protein 1 homolog B OS=Homo sapiens GN=TYW1B PE=2 SV=2                          | TYW1B_HUMAN  | 76,946.80  | 0.00%   | 0 | 0 | 0 | 0.00%  |
| c(+)-Tiva2 | Nucleolar and spindle-associated protein 1 OS=Homo sapiens GN=NUSAP1 PE=1 SV=1                               | NUSAP_HUMAN  | 49,452.80  | 0.00%   | 0 | 0 | 0 | 0.00%  |
| c(+)-Tiva2 | Pecanex-like protein 1 OS=Homo sapiens GN=PCNX PE=2 SV=2                                                     | PCX1_HUMAN   | 258,678.40 | 0.00%   | 0 | 0 | 0 | 0.00%  |
| c(+)-Tiva2 | Protein PML OS=Homo sapiens GN=PML PE=1 SV=3                                                                 | PML_HUMAN    | 97,550.90  | 0.00%   | 0 | 0 | 0 | 0.00%  |
| c(+)-Tiva2 | Tyrosine-protein phosphatase non-receptor type 22 OS=Homo sapiens GN=PTPN22 PE=1 SV=2                        | PTN22_HUMAN  | 91,707.90  | 0.00%   | 0 | 0 | 0 | 0.00%  |
| c(+)-Tiva2 | Dynein heavy chain domain-containing protein 1 OS=Homo sapiens GN=DNHD1 PE=1 SV=2                            | DNHD1_HUMAN  | 533,642.10 | 0.00%   | 0 | 0 | 0 | 0.00%  |
| c(+)-Tiva2 | Rootletin OS=Homo sapiens GN=CROCC PE=1 SV=1                                                                 | CROCC_HUMAN  | 228,524.80 | 0.00%   | 0 | 0 | 0 | 0.00%  |
| c(+)-Tiva2 | Midline-1 OS=Homo sapiens GN=MID1 PE=1 SV=1                                                                  | TRI18_HUMAN  | 75,251.30  | 91.60%  | 1 | 1 | 1 | 3.30%  |
| c(+)-Tiva2 | Proline-rich protein 11 OS=Homo sapiens GN=PRR11 PE=1 SV=1                                                   | PRR11_HUMAN  | 40,086.40  | 0.00%   | 0 | 0 | 0 | 0.00%  |
| c(+)-Tiva2 | Serine/threonine-protein kinase PLK4 OS=Homo sapiens GN=PLK4 PE=1 SV=3                                       | PLK4_HUMAN   | 108,975.20 | 0.00%   | 0 | 0 | 0 | 0.00%  |
| c(+)-Tiva2 | Mitochondrial intermediate peptidase OS=Homo sapiens GN=MIPEP PE=1 SV=2                                      | MIPEP_HUMAN  | 80,643.30  | 32.50%  | 0 | 0 | 0 | 0.00%  |
| c(+)-Tiva2 | Putative deoxyribose-phosphate aldolase OS=Homo sapiens GN=DERA PE=1 SV=2                                    | DEOC_HUMAN   | 35,231.80  | 0.00%   | 0 | 0 | 0 | 0.00%  |
| c(+)-Tiva2 | Selenocysteine insertion sequence-binding protein 2 OS=Homo sapiens GN=SECISBP2 PE=1 SV=2                    | SEBP2_HUMAN  | 95,463.20  | 0.00%   | 0 | 0 | 0 | 0.00%  |
| c(+)-Tiva2 | 40S ribosomal protein S3 OS=Homo sapiens GN=RPS3 PE=1 SV=2                                                   | RS3_HUMAN    | 26,688.60  | 45.60%  | 0 | 0 | 0 | 0.00%  |
| c(+)-Tiva2 | Myotubularin-related protein 11 OS=Homo sapiens GN=MTMR11 PE=2 SV=2                                          | MTMRB_HUMAN  | 79,546.80  | 46.10%  | 0 | 0 | 0 | 0.00%  |
| c(+)-Tiva2 | WASH complex subunit 7 OS=Homo sapiens GN=KIAA1033 PE=1 SV=2                                                 | WASH7_HUMAN  | 136,409.60 | 90.50%  | 1 | 1 | 1 | 0.85%  |
| c(+)-Tiva2 | Zinc finger and BTB domain-containing protein 40 OS=Homo sapiens GN=ZBTB40 PE=1 SV=4                         | ZBT40_HUMAN  | 138,118.10 | 99.10%  | 1 | 1 | 1 | 1.78%  |
| c(+)-Tiva2 | Low-density lipoprotein receptor-related protein 4 OS=Homo sapiens GN=LRP4 PE=1 SV=4                         | LRP4_HUMAN   | 212,045.40 | 0.00%   | 0 | 0 | 0 | 0.00%  |
| c(+)-Tiva2 | Putative 60S ribosomal protein L36-like 1 OS=Homo sapiens PE=5 SV=1                                          | RL36X_HUMAN  | 12,063.60  | 98.00%  | 1 | 1 | 1 | 25.70% |
| c(+)-Tiva2 | Arf-GAP with coiled-coil, ANK repeat and PH domain-containing protein 3 OS=Homo sapiens GN=ACAP3 PE=2 SV=2   | ACAP3_HUMAN  | 92,494.80  | 89.00%  | 1 | 1 | 1 | 2.52%  |
| c(+)-Tiva2 | Nebulin-related-anchoring protein OS=Homo sapiens GN=NRAP PE=2 SV=2                                          | NRAP_HUMAN   | 197,078.70 | 0.00%   | 0 | 0 | 0 | 0.00%  |
| c(+)-Tiva2 | Gelsolin OS=Homo sapiens GN=GSN PE=1 SV=1                                                                    | GELS_HUMAN   | 85,697.80  | 100.00% | 2 | 2 | 2 | 9.59%  |
| c(+)-Tiva2 | cAMP-specific 3',5'-cyclic phosphodiesterase 4A OS=Homo sapiens GN=PDE4A PE=1 SV=3                           | PDE4A_HUMAN  | 98,143.90  | 97.00%  | 1 | 1 | 1 | 2.14%  |
| c(+)-Tiva2 | Kinesin-like protein KIF3C OS=Homo sapiens GN=KIF3C PE=1 SV=3                                                | KIF3C_HUMAN  | 89,428.30  | 99.10%  | 1 | 1 | 1 | 3.91%  |
| c(+)-Tiva2 | Enoplakin-like protein OS=Homo sapiens GN=EVPL2 PE=2 SV=1                                                    | EVPL2_HUMAN  | 33,952.00  | 0.00%   | 0 | 0 | 0 | 0.00%  |
| c(+)-Tiva2 | Probable 2-oxoglutarate dehydrogenase E1 component DHTKD1, mitochondrial OS=Homo sapiens GN=DHTKD1 PE=2 SV=2 | DHTK1_HUMAN  | 103,078.40 | 61.30%  | 0 | 0 | 0 | 0.00%  |
| c(+)-Tiva2 | Sarcosine dehydrogenase, mitochondrial OS=Homo sapiens GN=SARDH PE=1 SV=1                                    | SARDH_HUMAN  | 101,037.00 | 0.00%   | 0 | 0 | 0 | 0.00%  |
| c(+)-Tiva2 | ATP-binding cassette sub-family A member 9 OS=Homo sapiens GN=ABCA9 PE=1 SV=1                                | ABCA9_HUMAN  | 184,370.20 | 88.90%  | 1 | 1 | 1 | 1.72%  |
| c(+)-Tiva2 | Relaxin receptor 2 OS=Homo sapiens GN=RXFP2 PE=1 SV=1                                                        | RXFP2_HUMAN  | 86,458.20  | 96.30%  | 1 | 1 | 1 | 2.79%  |
| c(+)-Tiva2 | Hepatocyte growth factor activator OS=Homo sapiens GN=HGFA PE=1 SV=1                                         | HGFA_HUMAN   | 70,681.50  | 0.00%   | 0 | 0 | 0 | 0.00%  |
| c(+)-Tiva2 | Histone-lysine N-methyltransferase SETD18 OS=Homo sapiens GN=SETD18 PE=1 SV=2                                | SET18_HUMAN  | 208,735.10 | 0.00%   | 0 | 0 | 0 | 0.00%  |
| c(+)-Tiva2 | UDP-glucose:glycoprotein glucosyltransferase 2 OS=Homo sapiens GN=UGGT2 PE=1 SV=4                            | UGGT2_HUMAN  | 174,743.70 | 93.60%  | 0 | 0 | 0 | 0.00%  |
| c(+)-Tiva2 | Deleted in lung and esophageal cancer protein 1 OS=Homo sapiens GN=DLEC1 PE=2 SV=2                           | DLEC1_HUMAN  | 195,685.60 | 96.80%  | 1 | 1 | 1 | 1.54%  |
| c(+)-Tiva2 | Cullin-associated NEDD8-dissociated protein 1 OS=Homo sapiens GN=CAND1 PE=1 SV=2                             | CAND1_HUMAN  | 136,381.10 | 0.00%   | 0 | 0 | 0 | 0.00%  |
| c(+)-Tiva2 | SH3 and multiple ankyrin repeat domains protein 1 OS=Homo sapiens GN=SHANK1 PE=1 SV=2                        | SHAN1_HUMAN  | 224,962.00 | 0.00%   | 0 | 0 | 0 | 0.00%  |
| c(+)-Tiva2 | Coatomer subunit gamma-1 OS=Homo sapiens GN=COPG1 PE=1 SV=1                                                  | COPG1_HUMAN  | 97,719.40  | 28.50%  | 0 | 0 | 0 | 0.00%  |
| c(+)-Tiva2 | Copine-2 OS=Homo sapiens GN=CPNE2 PE=1 SV=3                                                                  | CPNE2_HUMAN  | 61,191.60  | 0.00%   | 0 | 0 | 0 | 0.00%  |
| c(+)-Tiva2 | Protein furry homolog OS=Homo sapiens GN=FRY PE=1 SV=1                                                       | FRY_HUMAN    | 338,881.20 | 0.00%   | 0 | 0 | 0 | 0.00%  |
| c(+)-Tiva2 | BUD13 homolog OS=Homo sapiens GN=BUD13 PE=1 SV=1                                                             | BUD13_HUMAN  | 70,522.60  | 0.00%   | 0 | 0 | 0 | 0.00%  |
| c(+)-Tiva2 | MAP7 domain-containing protein 2 OS=Homo sapiens GN=MAP7D2 PE=1 SV=2                                         | MA7D2_HUMAN  | 81,966.80  | 97.90%  | 1 | 1 | 1 | 2.46%  |
| c(+)-Tiva2 | Dihydropyrimidinase OS=Homo sapiens GN=DPYS PE=1 SV=1                                                        | DPYS_HUMAN   | 56,629.90  | 28.10%  | 0 | 0 | 0 | 0.00%  |
| c(+)-Tiva2 | Collagen alpha-1(V) chain OS=Homo sapiens GN=COL5A1 PE=1 SV=3                                                | COS1A_HUMAN  | 183,562.70 | 84.10%  | 1 | 1 | 1 | 1.63%  |
| c(+)-Tiva2 | Tubulin beta-2B chain OS=Homo sapiens GN=TUBB2B PE=1 SV=1                                                    | TBB2B_HUMAN  | 49,953.10  | 99.10%  | 1 | 1 | 2 | 8.76%  |
| c(+)-Tiva2 | Dynein heavy chain 5, axonemal OS=Homo sapiens GN=DNAH5 PE=1 SV=3                                            | DYH5_HUMAN   | 529,029.50 | 84.70%  | 0 | 0 | 0 | 0.00%  |
| c(+)-Tiva2 | Sodium-dependent phosphate transporter 1 OS=Homo sapiens GN=SLC20A1 PE=1 SV=1                                | S20A1_HUMAN  | 73,700.90  | 88.50%  | 1 | 1 | 1 | 5.30%  |
| c(+)-Tiva2 | Protein artemis OS=Homo sapiens GN=DCLRE1C PE=1 SV=2                                                         | DCR1C_HUMAN  | 78,437.70  | 85.50%  | 1 | 1 | 1 | 4.48%  |
| c(+)-Tiva2 | Neurabin-1 OS=Homo sapiens GN=PPP1R9A PE=1 SV=2                                                              | NEB1_HUMAN   | 123,343.60 | 90.30%  | 1 | 1 | 1 | 1.18%  |
| c(+)-Tiva2 | Laminin subunit alpha-3 OS=Homo sapiens GN=LAMA3 PE=1 SV=2                                                   | LAMA3_HUMAN  | 366,642.50 | 99.10%  | 1 | 1 | 1 | 0.45%  |
| c(+)-Tiva2 | HEP-CMP kinase 2, mitochondrial OS=Homo sapiens GN=CMKP2 PE=1 SV=3                                           | CMKP2_HUMAN  | 49,447.90  | 0.00%   | 0 | 0 | 0 | 0.00%  |
| c(+)-Tiva2 | HERV-K_1q23.3 provirus ancestral Pol protein OS=Homo sapiens PE=3 SV=2                                       | POK7_HUMAN   | 91,950.60  | 60.10%  | 0 | 0 | 0 | 0.00%  |
| c(+)-Tiva2 | Inhibitor of Bruton tyrosine kinase OS=Homo sapiens GN=IBTK PE=1 SV=3                                        | IBTK_HUMAN   | 150,530.20 | 0.00%   | 0 | 0 | 0 | 0.00%  |
| c(+)-Tiva2 | 60S ribosomal protein L10a OS=Homo sapiens GN=RPL10A PE=1 SV=2                                               | RL10A_HUMAN  | 24,832.00  | 99.10%  | 1 | 1 | 1 | 5.99%  |
| c(+)-Tiva2 | Olfactory receptor 10K1 OS=Homo sapiens GN=OR10K1 PE=2 SV=1                                                  | O10K1_HUMAN  | 35,080.50  | 95.50%  | 1 | 1 | 1 | 10.20% |
| c(+)-Tiva2 | ATP-binding cassette sub-family B member 7, mitochondrial OS=Homo sapiens GN=ABCB7 PE=1 SV=2                 | ABCB7_HUMAN  | 82,643.20  | 0.00%   | 0 | 0 | 0 | 0.00%  |
| c(+)-Tiva2 | ATP-binding cassette sub-family C member 11 OS=Homo sapiens GN=ABCC11 PE=1 SV=1                              | ABCC8_HUMAN  | 154,306.40 | 0.00%   | 0 | 0 | 0 | 0.00%  |
| c(+)-Tiva2 | Acyl-CoA synthetase family member 2, mitochondrial OS=Homo sapiens GN=ACSF2 PE=1 SV=2                        | ACSF2_HUMAN  | 68,125.50  | 0.00%   | 0 | 0 | 0 | 0.00%  |
| c(+)-Tiva2 | Myotubularin-related protein 3 OS=Homo sapiens GN=MTMR3 PE=1 SV=3                                            | MTMR3_HUMAN  | 133,618.40 | 26.80%  | 0 | 0 | 0 | 0.00%  |
| c(+)-Tiva2 | E3 ubiquitin-protein ligase RNF19A OS=Homo sapiens GN=RNF19A PE=1 SV=3                                       | RN19A_HUMAN  | 90,697.10  | 0.00%   | 0 | 0 | 0 | 0.00%  |
| c(+)-Tiva2 | G-protein coupled receptor 124 OS=Homo sapiens GN=GPR124 PE=1 SV=2                                           | GP124_HUMAN  | 142,649.60 | 0.00%   | 0 | 0 | 0 | 0.00%  |
| c(+)-Tiva2 | Alpha-enolase OS=Homo sapiens GN=ENO1 PE=1 SV=2                                                              | ENOA_HUMAN   | 47,170.20  | 100.00% | 2 | 2 | 2 | 5.76%  |
| c(+)-Tiva2 | E3 ubiquitin-protein ligase UBR3 OS=Homo sapiens GN=UBR3 PE=2 SV=2                                           | UBR3_HUMAN   | 212,435.50 | 98.90%  | 1 | 1 | 1 | 1.43%  |
| c(+)-Tiva2 | Neurogenic locus notch homolog protein 4 OS=Homo sapiens GN=NOTCH4 PE=1 SV=2                                 | NOTC4_HUMAN  | 209,614.50 | 0.00%   | 0 | 0 | 0 | 0.00%  |
| c(+)-Tiva2 | Low-density lipoprotein receptor-related protein 5 OS=Homo sapiens GN=LRP5 PE=1 SV=2                         | LRP5_HUMAN   | 179,147.50 | 0.00%   | 0 | 0 | 0 | 0.00%  |
| c(+)-Tiva2 | Calreticulin OS=Homo sapiens GN=CALR PE=1 SV=1                                                               | CALR_HUMAN   | 48,142.90  | 100.00% | 3 | 3 | 3 | 16.50% |
| c(+)-Tiva2 | Tigger transposable element-derived protein 6 OS=Homo sapiens GN=TIGD6 PE=2 SV=2                             | TIGD6_HUMAN  | 58,657.80  | 46.30%  | 0 | 0 | 0 | 0.00%  |
| c(+)-Tiva2 | Sperm-specific antigen 2 OS=Homo sapiens GN=SSFA2 PE=1 SV=3                                                  | SSFA2_HUMAN  | 138,386.10 | 100.00% | 2 | 2 | 2 | 3.26%  |
| c(+)-Tiva2 | Receptor-type tyrosine-protein phosphatase O OS=Homo sapiens GN=PTPRO PE=1 SV=2                              | PTPRO_HUMAN  | 138,345.70 | 85.80%  | 1 | 1 | 1 | 1.32%  |
| c(+)-Tiva2 | Syntaxin-binding protein 2 OS=Homo sapiens GN=STXB2 PE=1 SV=2                                                | STXB2_HUMAN  | 66,454.80  | 0.00%   | 0 | 0 | 0 | 0.00%  |
| c(+)-Tiva2 | AF4/FMR2 family member 1 OS=Homo sapiens GN=AFF1 PE=1 SV=1                                                   | AFF1_HUMAN   | 131,423.30 | 0.00%   | 0 | 0 | 0 | 0.00%  |
| c(+)-Tiva2 | T-box transcription factor TBX20 OS=Homo sapiens GN=TBX20 PE=1 SV=4                                          | TBX20_HUMAN  | 49,233.20  | 0.00%   | 0 | 0 | 0 | 0.00%  |
| c(+)-Tiva2 | Estradiol 17-beta-dehydrogenase 12 OS=Homo sapiens GN=HSD17B12 PE=1 SV=2                                     | DHB12_HUMAN  | 34,325.40  | 99.10%  | 1 | 1 | 1 | 4.81%  |
| c(+)-Tiva2 | CDK5 and ABL1 enzyme substrate 2 OS=Homo sapiens GN=CABLES2 PE=1 SV=3                                        | CABL2_HUMAN  | 52,236.50  | 92.90%  | 1 | 1 | 1 | 3.97%  |
| c(+)-Tiva2 | DNA-dependent protein kinase catalytic subunit OS=Homo sapiens GN=PRKDC PE=1 SV=3                            | PRKDC_HUMAN  | 469,095.50 | 100.00% | 6 | 6 | 6 | 2.91%  |
| c(+)-Tiva2 | F-actin-capping protein subunit beta OS=Homo sapiens GN=CAPZB PE=1 SV=4                                      | CAPZB_HUMAN  | 31,351.60  | 100.00% | 4 | 4 | 4 | 24.50% |
| c(+)-Tiva2 | Tropomyosin beta chain OS=Homo sapiens GN=TPM2 PE=1 SV=1                                                     | TPM2_HUMAN   | 32,851.70  | 100.00% | 2 | 2 | 3 | 15.50% |
| c(+)-Tiva2 | UPF0258 protein KIAA1024 OS=Homo sapiens GN=KIAA1024 PE=2 SV=3                                               | K1024_HUMAN  | 102,995.30 | 74.20%  | 0 | 0 | 0 | 0.00%  |
| c(+)-Tiva2 | Cytoskeleton-associated protein 5 OS=Homo sapiens GN=CKAP5 PE=1 SV=3                                         | CKAP5_HUMAN  | 225,501.70 | 44.60%  | 0 | 0 | 0 | 0.00%  |
| c(+)-Tiva2 | F-box only protein 38 OS=Homo sapiens GN=FBXO38 PE=1 SV=3                                                    | FBX38_HUMAN  | 133,944.40 | 0.00%   | 0 | 0 | 0 | 0.00%  |
| c(+)-Tiva2 | Tetrapeptide repeat protein 25 OS=Homo sapiens GN=TTTC25 PE=1 SV=2                                           | TTTC25_HUMAN | 76,658.10  | 0.00%   | 0 | 0 | 0 | 0.00%  |
| c(+)-Tiva2 | HEAT repeat-containing protein 7B1 OS=Homo sapiens GN=HEATR7B1 PE=4 SV=3                                     | HTRB1_HUMAN  | 193,180.80 | 0.00%   | 0 | 0 | 0 | 0.00%  |
| c(+)-Tiva2 | Pyruvate kinase isozymes M1/M2 OS=Homo sapiens GN=PKM2 PE=1 SV=4                                             | KPYM_HUMAN   | 57,937.50  | 100.00% | 4 | 6 | 6 | 12.80% |
| c(+)-Tiva2 | Laminin subunit beta-1 OS=Homo sapiens GN=LAMB1 PE=1 SV=2                                                    | LAMB1_HUMAN  | 198,035.20 | 0.00%   | 0 | 0 | 0 | 0.00%  |
| c(+)-Tiva2 | Neuron navigator 3 OS=Homo sapiens GN=NAV3 PE=1 SV=3                                                         | NAV3_HUMAN   | 255,652.50 | 0.00%   | 0 | 0 | 0 | 0.00%  |
| c(+)-Tiva2 | Dual specificity tyrosine phosphatase 16 OS=Homo sapiens GN=DUSP16 PE=1 SV=1                                 | DUS16_HUMAN  | 73,103.10  | 0.00%   | 0 | 0 | 0 | 0.00%  |
| c(+)-Tiva2 | Solute carrier family 2, facilitated glucose transporter member 1 OS=Homo sapiens GN=SLC2A1 PE=1 SV=2        | GTR1_HUMAN   | 54,085.30  | 99.10%  | 1 | 1 | 1 | 3.46%  |
| c(+)-Tiva2 | Inhibitor of nuclear factor kappa-B kinase subunit alpha OS=Homo sapiens GN=CHUK PE=1 SV=2                   | IKKA_HUMAN   | 84,642.00  | 99.10%  | 1 | 1 | 1 | 2.42%  |
| c(+)-Tiva2 | Spectrin beta chain, brain 3 OS=Homo sapiens GN=SPTBN4 PE=1 SV=2                                             | SPTN4_HUMAN  | 288,984.10 | 0.00%   | 0 | 0 | 0 | 0.00%  |
| c(+)-Tiva2 | Basic helix-loop-helix domain-containing protein KIAA2018 OS=Homo sapiens GN=KIAA2018 PE=1 SV=3              | K2018_HUMAN  | 241,675.00 | 95.10%  | 1 | 1 | 1 | 1.47%  |
| c(+)-Tiva2 | Unconventional myosin-IXb OS=Homo sapiens GN=MYO9B PE=1 SV=3                                                 | MYO9B_HUMAN  | 243,405.60 | 98.70%  | 1 | 1 | 1 | 0.65%  |
| c(+)-Tiva2 | Ribonuclease 3 OS=Homo sapiens GN=DROSHA PE=1 SV=2                                                           | RNC_HUMAN    | 159,319.80 | 0.00%   | 0 | 0 | 0 | 0.00%  |

|            |                                                                                                           |              |              |         |    |    |     |        |
|------------|-----------------------------------------------------------------------------------------------------------|--------------|--------------|---------|----|----|-----|--------|
| c(+)-Tiva2 | SH2 domain-containing adapter protein B OS=Homo sapiens GN=SHB PE=1 SV=2                                  | SHB_HUMAN    | 55,043.40    | 98.80%  | 1  | 1  | 1   | 2.75%  |
| c(+)-Tiva2 | Ubiquitin carboxyl-terminal hydrolase 3S OS=Homo sapiens GN=USP35 PE=1 SV=3                               | UBP35_HUMAN  | 113,406.50   | 0.00%   | 0  | 0  | 0   | 0.00%  |
| c(+)-Tiva2 | Solute carrier family 26 member 6 OS=Homo sapiens GN=SLC26A6 PE=1 SV=1                                    | S26A6_HUMAN  | 82,967.70    | 0.00%   | 0  | 0  | 0   | 0.00%  |
| c(+)-Tiva2 | Hypoxia-inducible factor 1-alpha OS=Homo sapiens GN=HIF1A PE=1 SV=1                                       | HIF1A_HUMAN  | 92,672.50    | 97.70%  | 1  | 1  | 1   | 3.15%  |
| c(+)-Tiva2 | BTB/POZ domain-containing protein KCTD8 OS=Homo sapiens GN=KCTD8 PE=2 SV=1                                | KCTD8_HUMAN  | 52,441.00    | 0.00%   | 0  | 0  | 0   | 0.00%  |
| c(+)-Tiva2 | DNA topoisomerase 2-beta OS=Homo sapiens GN=TOP2B PE=1 SV=3                                               | TOP2B_HUMAN  | 183,273.10   | 99.10%  | 1  | 1  | 1   | 1.11%  |
| c(+)-Tiva2 | Rab3 GTPase-activating protein non-catalytic subunit OS=Homo sapiens GN=RAB3GAP2 PE=1 SV=1                | RBGPR_HUMAN  | 155,988.10   | 0.00%   | 0  | 0  | 0   | 0.00%  |
| c(+)-Tiva2 | Methyltransferase-like protein 8 OS=Homo sapiens GN=METTL8 PE=2 SV=2                                      | METL8_HUMAN  | 33,387.10    | 0.00%   | 0  | 0  | 0   | 0.00%  |
| c(+)-Tiva2 | Protein kinase C theta type OS=Homo sapiens GN=PRKQC PE=1 SV=3                                            | KPCT8_HUMAN  | 81,867.10    | 93.20%  | 1  | 1  | 1   | 2.55%  |
| c(+)-Tiva2 | Superkiller viralicidal activity 2-like 2 OS=Homo sapiens GN=SKIV2L2 PE=1 SV=3                            | SK2L2_HUMAN  | 117,808.30   | 99.90%  | 1  | 1  | 1   | 3.65%  |
| c(+)-Tiva2 | Dematin OS=Homo sapiens GN=EPB49 PE=1 SV=3                                                                | DEMA_HUMAN   | 45,515.90    | 99.10%  | 1  | 1  | 1   | 6.91%  |
| c(+)-Tiva2 | ATP-dependent RNA helicase DHX8 OS=Homo sapiens GN=DHX8 PE=1 SV=1                                         | DHX8_HUMAN   | 139,318.70   | 23.10%  | 0  | 0  | 0   | 0.00%  |
| c(+)-Tiva2 | Zinc finger protein 614 OS=Homo sapiens GN=ZNF614 PE=2 SV=2                                               | ZN614_HUMAN  | 67,213.80    | 0.00%   | 0  | 0  | 0   | 0.00%  |
| c(+)-Tiva2 | Lipoxygenase homology domain-containing protein 1 OS=Homo sapiens GN=LOXHD1 PE=2 SV=3                     | LOXH1_HUMAN  | 221,951.50   | 0.00%   | 0  | 0  | 0   | 0.00%  |
| c(+)-Tiva2 | ATP-dependent RNA helicase DDX50 OS=Homo sapiens GN=DDX50 PE=1 SV=1                                       | DDX50_HUMAN  | 82,566.70    | 99.10%  | 1  | 1  | 1   | 4.34%  |
| c(+)-Tiva2 | E3 ubiquitin-protein ligase RNF187 OS=Homo sapiens GN=RNF187 PE=1 SV=2                                    | RN187_HUMAN  | 26,190.00    | 99.10%  | 1  | 1  | 1   | 8.94%  |
| c(+)-Tiva2 | L-lactate dehydrogenase A-like 6A OS=Homo sapiens GN=LDHAL6A PE=2 SV=1                                    | LDH6A_HUMAN  | 36,508.40    | 99.10%  | 1  | 1  | 1   | 3.61%  |
| c(+)-Tiva2 | T-complex protein 1 subunit theta OS=Homo sapiens GN=CCT8 PE=1 SV=4                                       | TCPO_HUMAN   | 59,621.00    | 96.60%  | 1  | 1  | 1   | 2.92%  |
| c(+)-Tiva2 | Eukaryotic initiation factor 4A-III OS=Homo sapiens GN=EIF4A3 PE=1 SV=4                                   | IF4A3_HUMAN  | 46,872.40    | 99.10%  | 1  | 1  | 1   | 3.41%  |
| c(+)-Tiva2 | E3 ubiquitin-protein ligase UBR4 OS=Homo sapiens GN=UBR4 PE=1 SV=1                                        | UBR4_HUMAN   | 573,842.50   | 99.10%  | 1  | 1  | 1   | 0.66%  |
| c(+)-Tiva2 | Ran GTPase-activating protein 1 OS=Homo sapiens GN=RANGAP1 PE=1 SV=1                                      | RAGP1_HUMAN  | 63,543.30    | 87.40%  | 1  | 1  | 1   | 5.62%  |
| c(+)-Tiva2 | GPI inositol-deacylase OS=Homo sapiens GN=PGAP1 PE=2 SV=1                                                 | PGAP1_HUMAN  | 105,388.50   | 0.00%   | 0  | 0  | 0   | 0.00%  |
| c(+)-Tiva2 | Uncharacterized protein C16orf95 OS=Homo sapiens GN=C16orf95 PE=2 SV=1                                    | CP095_HUMAN  | 16,792.70    | 0.00%   | 0  | 0  | 0   | 0.00%  |
| c(+)-Tiva2 | Interleukin-1 receptor type 1 OS=Homo sapiens GN=IL1R1 PE=1 SV=1                                          | IL1R1_HUMAN  | 65,404.00    | 98.80%  | 1  | 1  | 1   | 6.50%  |
| c(+)-Tiva2 | Zinc finger protein 568 OS=Homo sapiens GN=ZNF568 PE=2 SV=2                                               | ZN568_HUMAN  | 74,367.90    | 0.00%   | 0  | 0  | 0   | 0.00%  |
| c(+)-Tiva2 | Uncharacterized protein KIAA2026 OS=Homo sapiens GN=KIAA2026 PE=2 SV=2                                    | K2026_HUMAN  | 228,089.50   | 0.00%   | 0  | 0  | 0   | 0.00%  |
| c(+)-Tiva2 | Polypeptide N-acetylglucosaminyltransferase 13 OS=Homo sapiens GN=GALNT13 PE=2 SV=2                       | GLT13_HUMAN  | 64,051.80    | 0.00%   | 0  | 0  | 0   | 0.00%  |
| c(+)-Tiva2 | Ubiquilin-1 OS=Homo sapiens GN=UBQLN1 PE=1 SV=2                                                           | UBQL1_HUMAN  | 62,519.50    | 0.00%   | 0  | 0  | 0   | 0.00%  |
| c(+)-Tiva2 | Steroid 21-hydroxylase OS=Homo sapiens GN=CYP21A2 PE=1 SV=1                                               | CP21A_HUMAN  | 55,889.20    | 24.60%  | 0  | 0  | 0   | 0.00%  |
| c(+)-Tiva2 | Sodium/hydrogen exchanger 10 OS=Homo sapiens GN=SLC9C1 PE=2 SV=2                                          | SL9C1_HUMAN  | 135,214.80   | 0.00%   | 0  | 0  | 0   | 0.00%  |
| c(+)-Tiva2 | Actin, aortic smooth muscle OS=Homo sapiens GN=ACTA2 PE=1 SV=1                                            | ACTA_HUMAN   | 42,010.10    | 100.00% | 18 | 43 | 143 | 45.90% |
| c(+)-Tiva2 | Protein kinase C eta type OS=Homo sapiens GN=PRKCH PE=1 SV=4                                              | KPCL_HUMAN   | 77,829.10    | 0.00%   | 0  | 0  | 0   | 0.00%  |
| c(+)-Tiva2 | DNA mismatch repair protein Msh6 OS=Homo sapiens GN=MSH6 PE=1 SV=2                                        | MSH6_HUMAN   | 152,789.90   | 56.00%  | 0  | 0  | 0   | 0.00%  |
| c(+)-Tiva2 | Msx2-interacting protein OS=Homo sapiens GN=SPEN PE=1 SV=1                                                | MINT_HUMAN   | 402,244.70   | 90.70%  | 1  | 1  | 1   | 0.46%  |
| c(+)-Tiva2 | Acetyl-CoA carboxylase 1 OS=Homo sapiens GN=ACACA PE=1 SV=2                                               | ACACA_HUMAN  | 265,556.40   | 99.10%  | 1  | 1  | 1   | 1.45%  |
| c(+)-Tiva2 | Choline transporter-like protein 1 OS=Homo sapiens GN=SLC44A1 PE=1 SV=1                                   | CTL1_HUMAN   | 73,304.60    | 92.70%  | 1  | 1  | 1   | 3.50%  |
| c(+)-Tiva2 | Myosin-10 OS=Homo sapiens GN=MYH10 PE=1 SV=3                                                              | MYH10_HUMAN  | 229,005.30   | 100.00% | 40 | 46 | 48  | 25.40% |
| c(+)-Tiva2 | Huntingtin-interacting protein 1-related protein OS=Homo sapiens GN=HIP1R PE=1 SV=2                       | HIP1R_HUMAN  | 119,389.70   | 0.00%   | 0  | 0  | 0   | 0.00%  |
| c(+)-Tiva2 | Sterile alpha and TIR motif-containing protein 1 OS=Homo sapiens GN=SARM1 PE=1 SV=1                       | SARM1_HUMAN  | 79,389.80    | 0.00%   | 0  | 0  | 0   | 0.00%  |
| c(+)-Tiva2 | Protein jagged-1 OS=Homo sapiens GN=JAG1 PE=1 SV=3                                                        | JAG1_HUMAN   | 133,796.00   | 99.10%  | 1  | 1  | 1   | 2.87%  |
| c(+)-Tiva2 | Unconventional myosin-XVIIIa OS=Homo sapiens GN=MYO18A PE=1 SV=3                                          | MY18A_HUMAN  | 233,119.80   | 100.00% | 3  | 3  | 3   | 1.95%  |
| c(+)-Tiva2 | X-linked retinitis pigmentosa GTPase regulator-interacting protein 1 OS=Homo sapiens GN=RPGRIP1 PE=1 SV=2 | RPGR1_HUMAN  | 146,684.50   | 0.00%   | 0  | 0  | 0   | 0.00%  |
| c(+)-Tiva2 | Spectrin beta chain, brain 4 OS=Homo sapiens GN=SPTBN5 PE=1 SV=1                                          | SPTN5_HUMAN  | 416,828.50   | 51.20%  | 0  | 0  | 0   | 0.00%  |
| c(+)-Tiva2 | Heterogeneous nuclear ribonucleoprotein K OS=Homo sapiens GN=HNRNPK PE=1 SV=1                             | HNRPK_HUMAN  | 50,978.50    | 100.00% | 2  | 2  | 2   | 9.94%  |
| c(+)-Tiva2 | Keratin, type I cytoskeletal 14 OS=Homo sapiens GN=KRT14 PE=1 SV=4                                        | K1C14_HUMAN  | 51,562.50    | 99.10%  | 1  | 1  | 1   | 6.36%  |
| c(+)-Tiva2 | Cartilage intermediate layer protein 2 OS=Homo sapiens GN=CILP2 PE=2 SV=2                                 | CILP2_HUMAN  | 126,290.90   | 0.00%   | 0  | 0  | 0   | 0.00%  |
| c(+)-Tiva2 | Uncharacterized protein C1orf87 OS=Homo sapiens GN=C1orf87 PE=2 SV=1                                      | CA087_HUMAN  | 62,036.90    | 94.10%  | 1  | 1  | 1   | 4.76%  |
| c(+)-Tiva2 | 59 kDa 2'-5'-oligoadenylate synthase-like protein OS=Homo sapiens GN=OASL PE=1 SV=2                       | OASL_HUMAN   | 59,227.20    | 99.10%  | 1  | 1  | 1   | 3.11%  |
| c(+)-Tiva2 | RNA-binding protein FUS OS=Homo sapiens GN=FUS PE=1 SV=1                                                  | FUS_HUMAN    | 53,426.00    | 100.00% | 2  | 2  | 2   | 6.27%  |
| c(+)-Tiva2 | Ankyrin repeat domain-containing protein 26 OS=Homo sapiens GN=ANKRD26 PE=1 SV=3                          | ANKR26_HUMAN | 196,327.20   | 98.30%  | 1  | 1  | 1   | 0.70%  |
| c(+)-Tiva2 | Exonuclease GOR OS=Homo sapiens GN=REXO1L1 PE=2 SV=2                                                      | GOR_HUMAN    | 73,855.50    | 0.00%   | 0  | 0  | 0   | 0.00%  |
| c(+)-Tiva2 | 60S ribosomal protein L3 OS=Homo sapiens GN=RPL3 PE=1 SV=2                                                | RL3_HUMAN    | 46,109.50    | 100.00% | 1  | 1  | 1   | 2.98%  |
| c(+)-Tiva2 | Cysteine-rich secretory protein LCCL domain-containing 2 OS=Homo sapiens GN=CRISPLD2 PE=1 SV=1            | CRLD2_HUMAN  | 55,918.70    | 0.00%   | 0  | 0  | 0   | 0.00%  |
| c(+)-Tiva2 | BRCA1-associated RING domain protein 1 OS=Homo sapiens GN=BARD1 PE=1 SV=2                                 | BARD1_HUMAN  | 86,649.50    | 35.40%  | 0  | 0  | 0   | 0.00%  |
| c(+)-Tiva2 | Desmin OS=Homo sapiens GN=DES PE=1 SV=3                                                                   | DESM_HUMAN   | 53,536.60    | 86.90%  | 1  | 1  | 1   | 1.70%  |
| c(+)-Tiva2 | Protein MCM10 homolog OS=Homo sapiens GN=MCM10 PE=1 SV=2                                                  | MCM10_HUMAN  | 98,185.70    | 79.00%  | 0  | 0  | 0   | 0.00%  |
| c(+)-Tiva2 | SPOC domain-containing protein 1 OS=Homo sapiens GN=SPOCD1 PE=2 SV=1                                      | SPOC1_HUMAN  | 130,027.70   | 99.10%  | 1  | 1  | 1   | 1.32%  |
| c(+)-Tiva2 | Frizzled-3 OS=Homo sapiens GN=FZD3 PE=1 SV=1                                                              | FZD3_HUMAN   | 76,264.80    | 98.70%  | 1  | 1  | 1   | 2.40%  |
| c(+)-Tiva2 | Adenosine deaminase CECR1 OS=Homo sapiens GN=CECR1 PE=1 SV=2                                              | CECR1_HUMAN  | 58,935.40    | 0.00%   | 0  | 0  | 0   | 0.00%  |
| c(+)-Tiva2 | Nck-associated protein 5-like OS=Homo sapiens GN=NCKAP5L PE=1 SV=2                                        | NCK5L_HUMAN  | 139,016.10   | 0.00%   | 0  | 0  | 0   | 0.00%  |
| c(+)-Tiva2 | N-alpha-acetyltransferase 25, NatB auxiliary subunit OS=Homo sapiens GN=NAA25 PE=1 SV=1                   | NAA25_HUMAN  | 112,297.80   | 99.10%  | 1  | 1  | 1   | 1.85%  |
| c(+)-Tiva2 | Periaxin OS=Homo sapiens GN=PRX PE=1 SV=2                                                                 | PRA_X_HUMAN  | 154,902.00   | 98.70%  | 1  | 1  | 1   | 1.10%  |
| c(+)-Tiva2 | Neuronal acetylcholine receptor subunit beta-4 OS=Homo sapiens GN=CHRNB4 PE=1 SV=2                        | ACHB4_HUMAN  | 56,380.80    | 0.00%   | 0  | 0  | 0   | 0.00%  |
| c(+)-Tiva2 | Titin OS=Homo sapiens GN=TTN PE=1 SV=4                                                                    | TITIN_HUMAN  | 3,815,692.20 | 100.00% | 3  | 3  | 3   | 0.25%  |
| c(+)-Tiva2 | Kelch domain-containing protein 8B OS=Homo sapiens GN=KLHDC8B PE=2 SV=1                                   | KLD8B_HUMAN  | 37,675.60    | 99.10%  | 1  | 1  | 1   | 4.52%  |
| c(+)-Tiva2 | Intercellular adhesion molecule 5 OS=Homo sapiens GN=ICAM5 PE=1 SV=3                                      | ICAM5_HUMAN  | 97,114.60    | 0.00%   | 0  | 0  | 0   | 0.00%  |
| c(+)-Tiva2 | Tripartite motif-containing protein 2 OS=Homo sapiens GN=TRIM2 PE=1 SV=1                                  | TRIM2_HUMAN  | 81,530.60    | 92.60%  | 1  | 1  | 1   | 2.28%  |

## Remsing Rix et al, Table S3

Identified Proteins (957)

|                                                                                           | Accession Number | Molecular Weight (kDa) | c-(-)-Tiva1 | c-(-)-Tiva2 | c-(+)-Tiva1 | c-(+)-Tiva2 |
|-------------------------------------------------------------------------------------------|------------------|------------------------|-------------|-------------|-------------|-------------|
| Glycogen synthase kinase-3 alpha OS=Homo sapiens GN=GSK3A PE=1 SV=2                       | GSK3A_HUMAN      | 51                     | 8           | 6           | 3           | 5           |
| Aspartyl/asparaginyl beta-hydroxylase OS=Homo sapiens GN=ASPH PE=1 SV=3                   | ASPH_HUMAN       | 86                     | 6           | 8           | 5           | 6           |
| F-actin-capping protein subunit alpha-2 OS=Homo sapiens GN=CAPZA2 PE=1 SV=3               | CAZA2_HUMAN      | 33                     | 3           | 6           | 2           | 4           |
| Glycogen synthase kinase-3 beta OS=Homo sapiens GN=GSK3B PE=1 SV=2                        | GSK3B_HUMAN      | 47                     | 10          | 9           | 4           | 8           |
| NAD(P)H dehydrogenase [quinone] 1 OS=Homo sapiens GN=NQO1 PE=1 SV=1                       | NQO1_HUMAN       | 31                     | 3           | 1           | 2           | 0           |
| ATP synthase subunit alpha, mitochondrial OS=Homo sapiens GN=ATP5A1 PE=1 SV=1             | ATPA_HUMAN       | 60                     | 7           | 7           | 4           | 7           |
| 60S ribosomal protein L7 OS=Homo sapiens GN=RPL7 PE=1 SV=1                                | RL7_HUMAN        | 29                     | 1           | 2           | 0           | 2           |
| 5'-nucleotidase OS=Homo sapiens GN=NT5E PE=1 SV=1                                         | 5NTD_HUMAN       | 63                     | 10          | 5           | 5           | 3           |
| Heterogeneous nuclear ribonucleoprotein C-like 1 OS=Homo sapiens GN=HNRNPCL1 PE=1 SV      | HNRCL_HUMAN      | 32                     | 1           | 5           | 0           | 1           |
| F-actin-capping protein subunit beta OS=Homo sapiens GN=CAPZB PE=1 SV=4                   | CAPZB_HUMAN      | 31                     | 9           | 10          | 5           | 9           |
| 60S acidic ribosomal protein P0-like OS=Homo sapiens GN=RPLP0P6 PE=5 SV=1                 | RLA0L_HUMAN      | 34                     | 1           | 3           | 1           | 2           |
| Tropomodulin-3 OS=Homo sapiens GN=TMOD3 PE=1 SV=1                                         | TMOD3_HUMAN      | 40                     | 7           | 11          | 3           | 9           |
| RuvB-like 2 OS=Homo sapiens GN=RUVBL2 PE=1 SV=3                                           | RUVB2_HUMAN      | 51                     | 4           | 5           | 3           | 4           |
| Uncharacterized protein C19orf21 OS=Homo sapiens GN=C19orf21 PE=1 SV=1                    | CS021_HUMAN      | 75                     | 1           | 10          | 0           | 9           |
| Actin, cytoplasmic 1 OS=Homo sapiens GN=ACTB PE=1 SV=1                                    | ACTB_HUMAN       | 42                     | 32          | 27          | 28          | 22          |
| Hepatocyte growth factor receptor OS=Homo sapiens GN=MET PE=1 SV=4                        | MET_HUMAN        | 156                    | 14          | 15          | 3           | 5           |
| Small nuclear ribonucleoprotein Sm D3 OS=Homo sapiens GN=SNRPD3 PE=1 SV=1                 | SMD3_HUMAN       | 14                     | 2           | 2           | 0           | 1           |
| Myeloid-associated differentiation marker OS=Homo sapiens GN=MYADM PE=1 SV=2              | MYADM_HUMAN      | 35                     | 2           | 2           | 0           | 0           |
| Flotillin-1 OS=Homo sapiens GN=FLOT1 PE=1 SV=3                                            | FLOT1_HUMAN      | 47                     | 1           | 4           | 0           | 3           |
| F-actin-capping protein subunit alpha-1 OS=Homo sapiens GN=CAPZA1 PE=1 SV=3               | CAZA1_HUMAN      | 33                     | 4           | 6           | 4           | 4           |
| 10 kDa heat shock protein, mitochondrial OS=Homo sapiens GN=HSPE1 PE=1 SV=2               | CH10_HUMAN       | 11                     | 2           | 0           | 0           | 0           |
| 40S ribosomal protein S28 OS=Homo sapiens GN=RPS28 PE=1 SV=1                              | RS28_HUMAN       | 8                      | 1           | 1           | 0           | 1           |
| Gelsolin OS=Homo sapiens GN=GSN PE=1 SV=1                                                 | GELS_HUMAN       | 86                     | 16          | 10          | 15          | 7           |
| Myosin light polypeptide 6 OS=Homo sapiens GN=MYL6 PE=1 SV=2                              | MYL6_HUMAN       | 17                     | 7           | 5           | 6           | 1           |
| LIM domain and actin-binding protein 1 OS=Homo sapiens GN=LIMA1 PE=1 SV=1                 | LIMA1_HUMAN      | 85                     | 51          | 48          | 35          | 45          |
| Prelamin-A/C OS=Homo sapiens GN=LMNA PE=1 SV=1                                            | LMNA_HUMAN       | 74                     | 17          | 25          | 14          | 23          |
| Keratin, type II cytoskeletal 4 OS=Homo sapiens GN=KRT4 PE=1 SV=4                         | K2C4_HUMAN       | 57                     | 15          | 11          | 11          | 10          |
| ERO1-like protein alpha OS=Homo sapiens GN=ERO1L PE=1 SV=2                                | ERO1A_HUMAN      | 54                     | 6           | 2           | 5           | 1           |
| ATP synthase subunit beta, mitochondrial OS=Homo sapiens GN=ATP5B PE=1 SV=3               | ATPB_HUMAN       | 57                     | 3           | 5           | 1           | 3           |
| Keratin, type I cytoskeletal 17 OS=Homo sapiens GN=KRT17 PE=1 SV=2                        | K1C17_HUMAN      | 48                     | 2           | 5           | 1           | 2           |
| Ras-related protein Rab-11A OS=Homo sapiens GN=RAB11A PE=1 SV=3                           | RB11A_HUMAN      | 24                     | 2           | 2           | 1           | 0           |
| Actin-related protein 2/3 complex subunit 5-like protein OS=Homo sapiens GN=ARPC5L PE=1   | ARPSL_HUMAN      | 17                     | 2           | 2           | 1           | 1           |
| Prohibitin OS=Homo sapiens GN=PHB PE=1 SV=1                                               | PHB_HUMAN        | 30                     | 1           | 3           | 0           | 1           |
| 40S ribosomal protein S27-like OS=Homo sapiens GN=RPS27L PE=1 SV=3                        | RS27L_HUMAN      | 9                      | 1           | 1           | 0           | 0           |
| Tubulin beta-2A chain OS=Homo sapiens GN=TUBB2A PE=1 SV=1                                 | TBB2A_HUMAN      | 50                     | 10          | 7           | 8           | 7           |
| Tropomyosin alpha-1 chain OS=Homo sapiens GN=TPM1 PE=1 SV=2                               | TPM1_HUMAN       | 33                     | 4           | 4           | 4           | 3           |
| Heat shock 70 kDa protein 1-like OS=Homo sapiens GN=HSPA1L PE=1 SV=2                      | HS71L_HUMAN      | 70                     | 5           | 4           | 4           | 4           |
| Thioredoxin-dependent peroxide reductase, mitochondrial OS=Homo sapiens GN=PRDX3 PE=      | PRDX3_HUMAN      | 28                     | 4           | 4           | 1           | 4           |
| Actin-related protein 2/3 complex subunit 4 OS=Homo sapiens GN=ARPC4 PE=1 SV=3            | ARPC4_HUMAN      | 20                     | 3           | 3           | 1           | 3           |
| Actin-related protein 2/3 complex subunit 3 OS=Homo sapiens GN=ARPC3 PE=1 SV=3            | ARPC3_HUMAN      | 21                     | 2           | 1           | 1           | 1           |
| SH3 domain-binding glutamic acid-rich-like protein 2 OS=Homo sapiens GN=SH3BGR2 PE=1      | SH3L2_HUMAN      | 12                     | 2           | 0           | 1           | 0           |
| Small nuclear ribonucleoprotein E OS=Homo sapiens GN=SNRPE PE=1 SV=1                      | RUXE_HUMAN       | 11                     | 1           | 1           | 0           | 1           |
| 60S ribosomal protein L38 OS=Homo sapiens GN=RPL38 PE=1 SV=2                              | RL38_HUMAN       | 8                      | 1           | 0           | 0           | 0           |
| Spectrin beta chain, non-erythrocytic 2 OS=Homo sapiens GN=SPTBN2 PE=1 SV=3               | SPTN2_HUMAN      | 271                    | 41          | 62          | 13          | 53          |
| Keratin, type II cytoskeletal 1 OS=Homo sapiens GN=KRT1 PE=1 SV=6                         | K2C1_HUMAN       | 66                     | 17          | 12          | 10          | 7           |
| Keratin, type I cytoskeletal 10 OS=Homo sapiens GN=KRT10 PE=1 SV=6                        | K1C10_HUMAN      | 59                     | 16          | 12          | 9           | 11          |
| Keratin, type I cytoskeletal 9 OS=Homo sapiens GN=KRT9 PE=1 SV=3                          | K1C9_HUMAN       | 62                     | 14          | 7           | 4           | 6           |
| Keratin, type II cytoskeletal 2 epidermal OS=Homo sapiens GN=KRT2 PE=1 SV=2               | K22E_HUMAN       | 65                     | 11          | 11          | 5           | 10          |
| Transferrin receptor protein 1 OS=Homo sapiens GN=TFRC PE=1 SV=2                          | TFR1_HUMAN       | 85                     | 8           | 8           | 2           | 4           |
| Myosin light chain 6B OS=Homo sapiens GN=MYL6B PE=1 SV=1                                  | MYL6B_HUMAN      | 23                     | 2           | 3           | 0           | 2           |
| RuvB-like 1 OS=Homo sapiens GN=RUVBL1 PE=1 SV=1                                           | RUVB1_HUMAN      | 50                     | 2           | 4           | 1           | 2           |
| Malate dehydrogenase, mitochondrial OS=Homo sapiens GN=MDH2 PE=1 SV=3                     | MDHM_HUMAN       | 36                     | 9           | 0           | 2           | 0           |
| 60S ribosomal protein L23 OS=Homo sapiens GN=RPL23 PE=1 SV=1                              | RL23_HUMAN       | 15                     | 1           | 1           | 1           | 0           |
| DNA-dependent protein kinase catalytic subunit OS=Homo sapiens GN=PRKDC PE=1 SV=3         | PRKDC_HUMAN      | 469                    | 62          | 13          | 16          | 24          |
| Unconventional myosin-VI OS=Homo sapiens GN=MYO6 PE=1 SV=4                                | MYO6_HUMAN       | 150                    | 26          | 16          | 14          | 24          |
| Histone deacetylase 6 OS=Homo sapiens GN=HDAC6 PE=1 SV=2                                  | HDAC6_HUMAN      | 131                    | 13          | 4           | 2           | 6           |
| Myosin regulatory light chain 12A OS=Homo sapiens GN=MYL12A PE=1 SV=2                     | ML12A_HUMAN      | 20                     | 10          | 6           | 6           | 7           |
| Unconventional myosin-Ie OS=Homo sapiens GN=MYO1E PE=1 SV=2                               | MYO1E_HUMAN      | 127                    | 8           | 3           | 3           | 1           |
| Fatty aldehyde dehydrogenase OS=Homo sapiens GN=ALDH3A2 PE=1 SV=1                         | AL3A2_HUMAN      | 55                     | 2           | 2           | 1           | 1           |
| Fragile X mental retardation syndrome-related protein 1 OS=Homo sapiens GN=FXR1 PE=1 SV   | FXR1_HUMAN       | 70                     | 1           | 1           | 0           | 0           |
| 40S ribosomal protein S16 OS=Homo sapiens GN=RPS16 PE=1 SV=2                              | RS16_HUMAN       | 16                     | 0           | 2           | 0           | 0           |
| Exportin-2 OS=Homo sapiens GN=CSE1L PE=1 SV=3                                             | XPO2_HUMAN       | 110                    | 8           | 3           | 2           | 3           |
| Exportin-1 OS=Homo sapiens GN=XPO1 PE=1 SV=1                                              | XPO1_HUMAN       | 123                    | 7           | 3           | 6           | 3           |
| 26S proteasome non-ATPase regulatory subunit 2 OS=Homo sapiens GN=PSMD2 PE=1 SV=3         | PSMD2_HUMAN      | 100                    | 5           | 1           | 3           | 1           |
| AP-2 complex subunit alpha-1 OS=Homo sapiens GN=AP2A1 PE=1 SV=3                           | AP2A1_HUMAN      | 108                    | 3           | 1           | 2           | 1           |
| Dolichyl-diphosphooligosaccharide--protein glycosyltransferase subunit 1 OS=Homo sapiens  | RPN1_HUMAN       | 69                     | 2           | 1           | 1           | 1           |
| Leucine-rich repeat flightless-interacting protein 1 OS=Homo sapiens GN=LRRFIP1 PE=1 SV=2 | LRRF1_HUMAN      | 89                     | 2           | 0           | 0           | 0           |
| Tubulin alpha-1C chain OS=Homo sapiens GN=TUBA1C PE=1 SV=1                                | TBA1C_HUMAN      | 50                     | 2           | 1           | 2           | 0           |
| Importin-7 OS=Homo sapiens GN=IPO7 PE=1 SV=1                                              | IPO7_HUMAN       | 120                    | 2           | 1           | 1           | 1           |
| Sarcoplasmic/endoplasmic reticulum calcium ATPase 1 OS=Homo sapiens GN=ATP2A1 PE=1 S      | AT2A1_HUMAN      | 110                    | 1           | 1           | 0           | 1           |
| Importin-5 OS=Homo sapiens GN=IPO5 PE=1 SV=4                                              | IPO5_HUMAN       | 124                    | 1           | 0           | 0           | 0           |
| CD59 glycoprotein OS=Homo sapiens GN=CD59 PE=1 SV=1                                       | CD59_HUMAN       | 14                     | 1           | 1           | 1           | 1           |
| Unconventional myosin-Va OS=Homo sapiens GN=MYO5A PE=1 SV=2                               | MYO5A_HUMAN      | 215                    | 19          | 10          | 1           | 20          |
| Elongation factor Tu, mitochondrial OS=Homo sapiens GN=TUFM PE=1 SV=2                     | EFTU_HUMAN       | 50                     | 8           | 6           | 2           | 8           |
| Unconventional myosin-Ia OS=Homo sapiens GN=MYO1A PE=1 SV=1                               | MYO1A_HUMAN      | 118                    | 3           | 3           | 1           | 2           |
| Spectrin beta chain, erythrocytic OS=Homo sapiens GN=SPTB PE=1 SV=5                       | SPTB1_HUMAN      | 246                    | 10          | 9           | 6           | 5           |
| Supervillin OS=Homo sapiens GN=SVIL PE=1 SV=2                                             | SVIL_HUMAN       | 248                    | 40          | 36          | 16          | 45          |
| Dynamin-like 120 kDa protein, mitochondrial OS=Homo sapiens GN=OPA1 PE=1 SV=3             | OPA1_HUMAN       | 112                    | 14          | 14          | 6           | 15          |

|                                                                                           |             |     |     |     |     |     |
|-------------------------------------------------------------------------------------------|-------------|-----|-----|-----|-----|-----|
| Trifunctional enzyme subunit alpha, mitochondrial OS=Homo sapiens GN=HADHA PE=1 SV=2      | ECHA_HUMAN  | 83  | 6   | 6   | 1   | 7   |
| U5 small nuclear ribonucleoprotein 200 kDa helicase OS=Homo sapiens GN=SNRNP200 PE=1      | U520_HUMAN  | 245 | 6   | 15  | 3   | 14  |
| Estradiol 17-beta-dehydrogenase 12 OS=Homo sapiens GN=HSD17B12 PE=1 SV=2                  | DHB12_HUMAN | 34  | 1   | 1   | 0   | 0   |
| Aspartate aminotransferase, mitochondrial OS=Homo sapiens GN=GOT2 PE=1 SV=3               | AATM_HUMAN  | 48  | 2   | 0   | 1   | 0   |
| Coronin-1B OS=Homo sapiens GN=CORO1B PE=1 SV=1                                            | COR1B_HUMAN | 54  | 3   | 2   | 1   | 2   |
| Spectrin beta chain, non-erythrocytic 1 OS=Homo sapiens GN=SPTBN1 PE=1 SV=2               | SPTB2_HUMAN | 275 | 218 | 197 | 169 | 198 |
| Glutamate dehydrogenase 1, mitochondrial OS=Homo sapiens GN=GLUD1 PE=1 SV=2               | DHE3_HUMAN  | 61  | 16  | 12  | 4   | 13  |
| WD repeat-containing protein 1 OS=Homo sapiens GN=WDR1 PE=1 SV=4                          | WDR1_HUMAN  | 66  | 3   | 3   | 2   | 2   |
| Catenin delta-1 OS=Homo sapiens GN=CTNND1 PE=1 SV=1                                       | CTND1_HUMAN | 108 | 2   | 7   | 1   | 6   |
| A-kinase anchor protein 2 OS=Homo sapiens GN=AKAP2 PE=1 SV=3                              | AKAP2_HUMAN | 95  | 9   | 3   | 4   | 6   |
| Inosine-5'-monophosphate dehydrogenase 2 OS=Homo sapiens GN=IMPDH2 PE=1 SV=2              | IMDH2_HUMAN | 56  | 1   | 1   | 0   | 0   |
| Heterogeneous nuclear ribonucleoprotein U-like protein 2 OS=Homo sapiens GN=HNRNPUL2      | HNRL2_HUMAN | 85  | 0   | 10  | 0   | 8   |
| ELAV-like protein 1 OS=Homo sapiens GN=ELAVL1 PE=1 SV=2                                   | ELAV1_HUMAN | 36  | 0   | 7   | 0   | 5   |
| Tubulin alpha-1A chain OS=Homo sapiens GN=TUBA1A PE=1 SV=1                                | TBA1A_HUMAN | 50  | 15  | 10  | 13  | 10  |
| Keratin, type I cytoskeletal 14 OS=Homo sapiens GN=KRT14 PE=1 SV=4                        | K1C14_HUMAN | 52  | 3   | 2   | 2   | 2   |
| Tropomyosin beta chain OS=Homo sapiens GN=TPM2 PE=1 SV=1                                  | TPM2_HUMAN  | 33  | 1   | 0   | 0   | 0   |
| Putative ribosomal RNA methyltransferase NOP2 OS=Homo sapiens GN=NOP2 PE=1 SV=2           | NOP2_HUMAN  | 89  | 1   | 2   | 0   | 2   |
| Minor histocompatibility antigen H13 OS=Homo sapiens GN=HM13 PE=1 SV=1                    | HM13_HUMAN  | 41  | 1   | 0   | 0   | 0   |
| Microtubule-actin cross-linking factor 1, isoforms 1/2/3/5 OS=Homo sapiens GN=MACF1 PE=1  | MACF1_HUMAN | 838 | 1   | 1   | 1   | 0   |
| Galectin-3-binding protein OS=Homo sapiens GN=LGALS3BP PE=1 SV=1                          | LG3BP_HUMAN | 65  | 7   | 5   | 6   | 5   |
| Coatomer subunit beta' OS=Homo sapiens GN=COPB2 PE=1 SV=2                                 | COPB2_HUMAN | 102 | 5   | 2   | 4   | 2   |
| 26S protease regulatory subunit 6A OS=Homo sapiens GN=PSMC3 PE=1 SV=3                     | PRS6A_HUMAN | 49  | 4   | 0   | 0   | 0   |
| Tubulin alpha-1B chain OS=Homo sapiens GN=TUBA1B PE=1 SV=1                                | TBA1B_HUMAN | 50  | 3   | 1   | 1   | 1   |
| Matrin-3 OS=Homo sapiens GN=MATR3 PE=1 SV=2                                               | MATR3_HUMAN | 95  | 2   | 7   | 0   | 7   |
| Erlin-1 OS=Homo sapiens GN=ERLIN1 PE=1 SV=1                                               | ERLN1_HUMAN | 39  | 2   | 1   | 0   | 1   |
| Serine/threonine-protein kinase ATR OS=Homo sapiens GN=ATR PE=1 SV=3                      | ATR_HUMAN   | 301 | 2   | 0   | 0   | 0   |
| Nuclear pore complex protein Nup93 OS=Homo sapiens GN=NUP93 PE=1 SV=2                     | NUP93_HUMAN | 93  | 2   | 0   | 0   | 0   |
| Far upstream element-binding protein 2 OS=Homo sapiens GN=KHSRP PE=1 SV=4                 | FUBP2_HUMAN | 73  | 2   | 1   | 2   | 0   |
| 26S protease regulatory subunit 4 OS=Homo sapiens GN=PSMC1 PE=1 SV=1                      | PRS4_HUMAN  | 49  | 2   | 1   | 2   | 0   |
| Spectrin alpha chain, erythrocytic 1 OS=Homo sapiens GN=SPTA1 PE=1 SV=5                   | SPTA1_HUMAN | 280 | 1   | 0   | 0   | 0   |
| Mediator of RNA polymerase II transcription subunit 13 OS=Homo sapiens GN=MED13 PE=1      | MED13_HUMAN | 239 | 1   | 0   | 0   | 0   |
| Nuclear pore complex protein Nup205 OS=Homo sapiens GN=NUP205 PE=1 SV=3                   | NU205_HUMAN | 228 | 1   | 0   | 0   | 0   |
| Obscurin-like protein 1 OS=Homo sapiens GN=OBSL1 PE=1 SV=4                                | OBSL1_HUMAN | 207 | 1   | 0   | 0   | 0   |
| Mitogen-activated protein kinase kinase kinase 6 OS=Homo sapiens GN=MAP3K6 PE=1 SV=3      | M3K6_HUMAN  | 143 | 1   | 0   | 0   | 0   |
| Mucin-1 OS=Homo sapiens GN=MUC1 PE=1 SV=3                                                 | MUC1_HUMAN  | 122 | 1   | 1   | 0   | 1   |
| PAX-interacting protein 1 OS=Homo sapiens GN=PAXIP1 PE=1 SV=2                             | PAX11_HUMAN | 121 | 1   | 0   | 0   | 0   |
| Integrator complex subunit 8 OS=Homo sapiens GN=INTS8 PE=1 SV=1                           | INT8_HUMAN  | 113 | 1   | 0   | 0   | 0   |
| Ankyrin repeat and MYND domain-containing protein 1 OS=Homo sapiens GN=ANKMY1 PE=2        | ANKY1_HUMAN | 106 | 1   | 0   | 0   | 0   |
| Tuftelin-interacting protein 11 OS=Homo sapiens GN=TFIP11 PE=1 SV=1                       | TFP11_HUMAN | 97  | 1   | 0   | 0   | 0   |
| V-type proton ATPase 116 kDa subunit a isoform 1 OS=Homo sapiens GN=ATP6V0A1 PE=1 SV      | VPP1_HUMAN  | 96  | 1   | 0   | 0   | 0   |
| Signal recognition particle receptor subunit alpha OS=Homo sapiens GN=SRPR PE=1 SV=2      | SRPR_HUMAN  | 70  | 1   | 0   | 0   | 0   |
| Cdc42-interacting protein 4 OS=Homo sapiens GN=TRIP10 PE=1 SV=3                           | CIP4_HUMAN  | 68  | 1   | 0   | 0   | 0   |
| Harmonin OS=Homo sapiens GN=USH1C PE=1 SV=3                                               | USH1C_HUMAN | 62  | 1   | 0   | 0   | 0   |
| Aldehyde dehydrogenase family 1 member A3 OS=Homo sapiens GN=ALDH1A3 PE=1 SV=2            | AL1A3_HUMAN | 56  | 1   | 0   | 0   | 0   |
| Coiled-coil domain-containing protein 91 OS=Homo sapiens GN=CCDC91 PE=1 SV=2              | CCD91_HUMAN | 50  | 1   | 0   | 0   | 0   |
| Ornithine aminotransferase, mitochondrial OS=Homo sapiens GN=OAT PE=1 SV=1                | OAT_HUMAN   | 49  | 1   | 0   | 0   | 0   |
| Dihydropyrimidinase-residue succinyltransferase component of 2-oxoglutarate dehydrogenase | ODO2_HUMAN  | 49  | 1   | 2   | 0   | 2   |
| Choline-phosphate cytidylyltransferase A OS=Homo sapiens GN=PCYT1A PE=1 SV=2              | PCY1A_HUMAN | 42  | 1   | 0   | 0   | 0   |
| Isocitrate dehydrogenase [NAD] subunit alpha, mitochondrial OS=Homo sapiens GN=IDH3A P    | IDH3A_HUMAN | 40  | 1   | 0   | 0   | 0   |
| Casein kinase I isoform alpha-like OS=Homo sapiens GN=CSNK1A1L PE=2 SV=2                  | KC1AL_HUMAN | 39  | 1   | 0   | 0   | 0   |
| ADP/ATP translocase 2 OS=Homo sapiens GN=SLC25A5 PE=1 SV=7                                | ADT2_HUMAN  | 33  | 1   | 2   | 0   | 2   |
| Pyrroline-5-carboxylate reductase 1, mitochondrial OS=Homo sapiens GN=PYCR1 PE=1 SV=2     | P5CR1_HUMAN | 33  | 1   | 0   | 0   | 0   |
| Redox-regulatory protein FAM213A OS=Homo sapiens GN=FAM213A PE=1 SV=3                     | F213A_HUMAN | 26  | 1   | 0   | 0   | 0   |
| Isochorismatase domain-containing protein 2, mitochondrial OS=Homo sapiens GN=ISOC2 PE    | ISOC2_HUMAN | 22  | 1   | 0   | 0   | 0   |
| Coatomer subunit delta OS=Homo sapiens GN=ARCN1 PE=1 SV=1                                 | COPD_HUMAN  | 57  | 1   | 1   | 0   | 1   |
| Histone H1oo OS=Homo sapiens GN=H1FOO PE=2 SV=1                                           | H1FOO_HUMAN | 36  | 1   | 0   | 0   | 0   |
| AP-1 complex subunit beta-1 OS=Homo sapiens GN=AP1B1 PE=1 SV=2                            | AP1B1_HUMAN | 105 | 1   | 2   | 1   | 0   |
| Actin-related protein 2 OS=Homo sapiens GN=ACTR2 PE=1 SV=1                                | ARP2_HUMAN  | 45  | 4   | 5   | 4   | 5   |
| Serine/arginine-rich splicing factor 1 OS=Homo sapiens GN=SRSF1 PE=1 SV=2                 | SRSF1_HUMAN | 28  | 2   | 4   | 2   | 4   |
| Putative 60S ribosomal protein L13a-like MGC87657 OS=Homo sapiens PE=5 SV=1               | R13AX_HUMAN | 12  | 1   | 1   | 1   | 1   |
| Tubulin beta-3 chain OS=Homo sapiens GN=TUBB3 PE=1 SV=2                                   | TBB3_HUMAN  | 50  | 2   | 2   | 0   | 1   |
| Histone deacetylase 1 OS=Homo sapiens GN=HDAC1 PE=1 SV=1                                  | HDAC1_HUMAN | 55  | 1   | 2   | 0   | 0   |
| Serine/threonine-protein phosphatase PP1-alpha catalytic subunit OS=Homo sapiens GN=PPF   | PP1A_HUMAN  | 38  | 1   | 7   | 2   | 2   |
| Cytoplasmic dynein 1 heavy chain 1 OS=Homo sapiens GN=DYNC1H1 PE=1 SV=5                   | DYHC1_HUMAN | 532 | 3   | 3   | 2   | 3   |
| Retinoic acid-induced protein 3 OS=Homo sapiens GN=GPRC5A PE=1 SV=2                       | RAI3_HUMAN  | 40  | 2   | 1   | 1   | 1   |
| Heterogeneous nuclear ribonucleoprotein H OS=Homo sapiens GN=HNRNPH1 PE=1 SV=4            | HNRH1_HUMAN | 49  | 7   | 8   | 5   | 10  |
| Peroxioredoxin-1 OS=Homo sapiens GN=PRDX1 PE=1 SV=1                                       | PRDX1_HUMAN | 22  | 7   | 7   | 10  | 7   |
| Ubiquitin-60S ribosomal protein L40 OS=Homo sapiens GN=UBA52 PE=1 SV=2                    | RL40_HUMAN  | 15  | 1   | 1   | 3   | 1   |
| Myosin-14 OS=Homo sapiens GN=MYH14 PE=1 SV=2                                              | MYH14_HUMAN | 228 | 127 | 49  | 117 | 56  |
| Unconventional myosin-XVIIIa OS=Homo sapiens GN=MYO18A PE=1 SV=3                          | MY18A_HUMAN | 233 | 26  | 15  | 24  | 21  |
| Unconventional myosin-Ic OS=Homo sapiens GN=MYO1C PE=1 SV=4                               | MYO1C_HUMAN | 122 | 19  | 28  | 17  | 32  |
| Myosin-11 OS=Homo sapiens GN=MYH11 PE=1 SV=3                                              | MYH11_HUMAN | 227 | 15  | 11  | 16  | 10  |
| Unconventional myosin-Vc OS=Homo sapiens GN=MYO5C PE=1 SV=2                               | MYO5C_HUMAN | 203 | 7   | 3   | 3   | 6   |
| DnaJ homolog subfamily C member 10 OS=Homo sapiens GN=DNAJC10 PE=1 SV=2                   | DJC10_HUMAN | 91  | 7   | 1   | 1   | 4   |
| DnaJ homolog subfamily C member 13 OS=Homo sapiens GN=DNAJC13 PE=1 SV=5                   | DJC13_HUMAN | 254 | 3   | 1   | 0   | 3   |
| 40S ribosomal protein S24 OS=Homo sapiens GN=RPS24 PE=1 SV=1                              | RS24_HUMAN  | 15  | 0   | 1   | 0   | 0   |
| 60S ribosomal protein L18 OS=Homo sapiens GN=RPL18 PE=1 SV=2                              | RL18_HUMAN  | 22  | 0   | 2   | 0   | 1   |
| Synaptosomal-associated protein 23 OS=Homo sapiens GN=SNAP23 PE=1 SV=1                    | SNP23_HUMAN | 23  | 0   | 2   | 0   | 0   |
| Desmoglein-2 OS=Homo sapiens GN=DSG2 PE=1 SV=2                                            | DSG2_HUMAN  | 122 | 0   | 3   | 0   | 2   |
| Unconventional myosin-XIX OS=Homo sapiens GN=MYO19 PE=2 SV=2                              | MYO19_HUMAN | 109 | 0   | 3   | 0   | 1   |
| 60S acidic ribosomal protein P1 OS=Homo sapiens GN=RPLP1 PE=1 SV=1                        | RLA1_HUMAN  | 12  | 0   | 1   | 0   | 0   |

|                                                                                            |             |     |     |     |     |     |
|--------------------------------------------------------------------------------------------|-------------|-----|-----|-----|-----|-----|
| 60S ribosomal protein L30 OS=Homo sapiens GN=RPL30 PE=1 SV=2                               | RL30_HUMAN  | 13  | 0   | 1   | 0   | 0   |
| Aldo-keto reductase family 1 member C1 OS=Homo sapiens GN=AKR1C1 PE=1 SV=1                 | AK1C1_HUMAN | 37  | 3   | 2   | 11  | 2   |
| Single-stranded DNA-binding protein, mitochondrial OS=Homo sapiens GN=SSBP1 PE=1 SV=1      | SSBP_HUMAN  | 17  | 1   | 1   | 1   | 2   |
| Tubulin beta-1 chain OS=Homo sapiens GN=TUBB1 PE=1 SV=1                                    | TBB1_HUMAN  | 50  | 2   | 2   | 2   | 2   |
| AP-2 complex subunit alpha-2 OS=Homo sapiens GN=AP2A2 PE=1 SV=2                            | AP2A2_HUMAN | 104 | 1   | 0   | 1   | 0   |
| POTE ankyrin domain family member J OS=Homo sapiens GN=POTEJ PE=3 SV=1                     | POTEJ_HUMAN | 117 | 1   | 0   | 1   | 0   |
| Tubulin beta-8 chain OS=Homo sapiens GN=TUBB8 PE=1 SV=2                                    | TBB8_HUMAN  | 50  | 2   | 0   | 2   | 0   |
| 40S ribosomal protein S17-like OS=Homo sapiens GN=RPS17L PE=2 SV=1                         | RS17L_HUMAN | 16  | 1   | 0   | 1   | 0   |
| Clathrin heavy chain 1 OS=Homo sapiens GN=CLTC PE=1 SV=5                                   | CLH1_HUMAN  | 192 | 51  | 39  | 44  | 52  |
| Drebrin OS=Homo sapiens GN=DBN1 PE=1 SV=4                                                  | DREB_HUMAN  | 71  | 25  | 24  | 20  | 29  |
| Keratin, type II cytoskeletal 7 OS=Homo sapiens GN=KRT7 PE=1 SV=5                          | K2C7_HUMAN  | 51  | 23  | 15  | 21  | 22  |
| Protein flightless-1 homolog OS=Homo sapiens GN=FLII PE=1 SV=2                             | FLII_HUMAN  | 145 | 16  | 7   | 10  | 15  |
| Endoplasmic reticulum protein OS=Homo sapiens GN=HSP90B1 PE=1 SV=1                         | ENPL_HUMAN  | 92  | 16  | 2   | 22  | 1   |
| Alpha-actinin-4 OS=Homo sapiens GN=ACTN4 PE=1 SV=2                                         | ACTN4_HUMAN | 105 | 14  | 21  | 25  | 19  |
| 60 kDa heat shock protein, mitochondrial OS=Homo sapiens GN=HSPD1 PE=1 SV=2                | CH60_HUMAN  | 61  | 11  | 6   | 8   | 9   |
| Alpha-actinin-1 OS=Homo sapiens GN=ACTN1 PE=1 SV=2                                         | ACTN1_HUMAN | 103 | 6   | 16  | 18  | 9   |
| Tubulin beta-4A chain OS=Homo sapiens GN=TUBB4A PE=1 SV=2                                  | TBB4A_HUMAN | 50  | 6   | 2   | 5   | 4   |
| Twinfilin-1 OS=Homo sapiens GN=TWf1 PE=1 SV=3                                              | TFW1_HUMAN  | 40  | 4   | 3   | 3   | 4   |
| Erythrocyte band 7 integral membrane protein OS=Homo sapiens GN=STOM PE=1 SV=3             | STOM_HUMAN  | 32  | 2   | 2   | 1   | 3   |
| 60S ribosomal protein L10a OS=Homo sapiens GN=RPL10A PE=1 SV=2                             | RL10A_HUMAN | 25  | 0   | 1   | 0   | 0   |
| Probable ATP-dependent RNA helicase DDX5 OS=Homo sapiens GN=DDX5 PE=1 SV=1                 | DDX5_HUMAN  | 69  | 0   | 4   | 0   | 2   |
| Actin, aortic smooth muscle OS=Homo sapiens GN=ACTA2 PE=1 SV=1                             | ACTA_HUMAN  | 42  | 34  | 31  | 28  | 32  |
| Coronin-1C OS=Homo sapiens GN=CORO1C PE=1 SV=1                                             | COR1C_HUMAN | 53  | 27  | 20  | 24  | 26  |
| Nucleophosmin OS=Homo sapiens GN=NPM1 PE=1 SV=2                                            | NPM_HUMAN   | 33  | 9   | 7   | 8   | 9   |
| Heat shock cognate 71 kDa protein OS=Homo sapiens GN=HSPA8 PE=1 SV=1                       | HSP7C_HUMAN | 71  | 9   | 6   | 8   | 7   |
| 60S ribosomal protein L12 OS=Homo sapiens GN=RPL12 PE=1 SV=1                               | RL12_HUMAN  | 18  | 3   | 2   | 2   | 3   |
| Heterogeneous nuclear ribonucleoprotein K OS=Homo sapiens GN=HNRNPK PE=1 SV=1              | HNRPK_HUMAN | 51  | 2   | 10  | 7   | 5   |
| Heterogeneous nuclear ribonucleoproteins C1/C2 OS=Homo sapiens GN=HNRNPC PE=1 SV=4         | HNRPC_HUMAN | 34  | 1   | 4   | 0   | 5   |
| 40S ribosomal protein S2 OS=Homo sapiens GN=RPS2 PE=1 SV=2                                 | RS2_HUMAN   | 31  | 0   | 1   | 0   | 0   |
| Unconventional myosin-1b OS=Homo sapiens GN=MYO1B PE=1 SV=3                                | MYO1B_HUMAN | 132 | 30  | 27  | 30  | 32  |
| Protein disulfide-isomerase OS=Homo sapiens GN=P4HB PE=1 SV=3                              | PDIA1_HUMAN | 57  | 7   | 0   | 15  | 0   |
| Actin-related protein 3 OS=Homo sapiens GN=ACTR3 PE=1 SV=3                                 | ARP3_HUMAN  | 47  | 7   | 8   | 7   | 9   |
| 40S ribosomal protein S3 OS=Homo sapiens GN=RPS3 PE=1 SV=2                                 | RS3_HUMAN   | 27  | 4   | 5   | 6   | 5   |
| Elongation factor 1-alpha 1 OS=Homo sapiens GN=EEF1A1 PE=1 SV=1                            | EF1A1_HUMAN | 50  | 4   | 3   | 7   | 3   |
| Beta-actin-like protein 2 OS=Homo sapiens GN=ACTBL2 PE=1 SV=2                              | ACTBL_HUMAN | 42  | 3   | 3   | 5   | 3   |
| Caveolin-1 OS=Homo sapiens GN=CAV1 PE=1 SV=4                                               | CAV1_HUMAN  | 20  | 2   | 4   | 2   | 5   |
| Interleukin enhancer-binding factor 2 OS=Homo sapiens GN=ILF2 PE=1 SV=2                    | ILF2_HUMAN  | 43  | 0   | 5   | 0   | 5   |
| Electron transfer flavoprotein subunit alpha, mitochondrial OS=Homo sapiens GN=ETFA PE=1   | ETFA_HUMAN  | 35  | 2   | 0   | 2   | 0   |
| Very long-chain specific acyl-CoA dehydrogenase, mitochondrial OS=Homo sapiens GN=ACAD     | ACADV_HUMAN | 70  | 1   | 0   | 1   | 0   |
| Putative tropomyosin alpha-3 chain-like protein OS=Homo sapiens PE=5 SV=2                  | TPM3L_HUMAN | 26  | 1   | 1   | 1   | 1   |
| Guanine nucleotide-binding protein (Gi) subunit alpha-1 OS=Homo sapiens GN=GNAI1 PE=1 SV=1 | GNAI1_HUMAN | 40  | 1   | 1   | 1   | 1   |
| Myosin light chain 1/3, skeletal muscle isoform OS=Homo sapiens GN=MYL1 PE=1 SV=3          | MYL1_HUMAN  | 21  | 1   | 1   | 1   | 1   |
| Tubulin beta-4B chain OS=Homo sapiens GN=TUBB4B PE=1 SV=1                                  | TBB4B_HUMAN | 50  | 1   | 1   | 1   | 1   |
| AP-2 complex subunit beta OS=Homo sapiens GN=AP2B1 PE=1 SV=1                               | AP2B1_HUMAN | 105 | 1   | 1   | 1   | 1   |
| sp Q13813 SPTA2_HUMAN Spectrin alpha chain, brain OS=Homo sapiens GN=SPTAN1 PE             | SPTA2_HUMAN | 285 | 265 | 215 | 191 | 256 |
| Plectin OS=Homo sapiens GN=PLEC PE=1 SV=3                                                  | PLEC_HUMAN  | 532 | 200 | 225 | 163 | 236 |
| Keratin, type I cytoskeletal 18 OS=Homo sapiens GN=KRT18 PE=1 SV=2                         | K1C18_HUMAN | 48  | 20  | 17  | 21  | 16  |
| Annexin A2 OS=Homo sapiens GN=ANXA2 PE=1 SV=2                                              | ANXA2_HUMAN | 39  | 6   | 12  | 14  | 11  |
| Putative beta-actin-like protein 3 OS=Homo sapiens GN=POTEKP PE=5 SV=1                     | ACTBM_HUMAN | 42  | 4   | 3   | 5   | 2   |
| Guanine nucleotide-binding protein subunit beta-2-like 1 OS=Homo sapiens GN=GNB2L1 PE=     | GBLP_HUMAN  | 35  | 4   | 10  | 11  | 7   |
| Keratin, type I cytoskeletal 13 OS=Homo sapiens GN=KRT13 PE=1 SV=4                         | K1C13_HUMAN | 50  | 3   | 3   | 4   | 2   |
| Heterogeneous nuclear ribonucleoproteins A2/B1 OS=Homo sapiens GN=HNRNP2A2B1 PE=1 SV=1     | ROA2_HUMAN  | 37  | 2   | 16  | 4   | 14  |
| Fatty acid synthase OS=Homo sapiens GN=FASN PE=1 SV=3                                      | FAS_HUMAN   | 273 | 2   | 3   | 3   | 1   |
| Coronin-2A OS=Homo sapiens GN=CORO2A PE=2 SV=2                                             | COR2A_HUMAN | 60  | 9   | 4   | 6   | 9   |
| Protein disulfide-isomerase A6 OS=Homo sapiens GN=PDIA6 PE=1 SV=1                          | PDIA6_HUMAN | 48  | 5   | 3   | 9   | 1   |
| Nuclear pore complex protein Nup155 OS=Homo sapiens GN=NUP155 PE=1 SV=1                    | NU155_HUMAN | 155 | 5   | 0   | 1   | 3   |
| Actin-related protein 2/3 complex subunit 2 OS=Homo sapiens GN=ARPC2 PE=1 SV=1             | ARPC2_HUMAN | 34  | 5   | 1   | 3   | 5   |
| 26S protease regulatory subunit 10B OS=Homo sapiens GN=PSMC6 PE=1 SV=1                     | PRS10_HUMAN | 44  | 4   | 0   | 1   | 1   |
| Ladinin-1 OS=Homo sapiens GN=LAD1 PE=1 SV=2                                                | LAD1_HUMAN  | 57  | 4   | 10  | 6   | 8   |
| Splicing factor 3B subunit 3 OS=Homo sapiens GN=SF3B3 PE=1 SV=4                            | SF3B3_HUMAN | 136 | 2   | 8   | 3   | 6   |
| Agrin OS=Homo sapiens GN=AGRN PE=1 SV=5                                                    | AGRN_HUMAN  | 217 | 2   | 3   | 0   | 4   |
| Histone deacetylase 10 OS=Homo sapiens GN=HDAC10 PE=1 SV=1                                 | HDA10_HUMAN | 71  | 2   | 1   | 0   | 2   |
| Pre-mRNA branch site protein p14 OS=Homo sapiens GN=SF3B14 PE=1 SV=1                       | PM14_HUMAN  | 15  | 1   | 1   | 0   | 2   |
| Pyruvate dehydrogenase E1 component subunit beta, mitochondrial OS=Homo sapiens GN=P       | ODPB_HUMAN  | 39  | 1   | 6   | 2   | 5   |
| 40S ribosomal protein S20 OS=Homo sapiens GN=RPS20 PE=1 SV=1                               | RS20_HUMAN  | 13  | 0   | 1   | 0   | 0   |
| Apolipoprotein B-100 OS=Homo sapiens GN=APOB PE=1 SV=2                                     | APOB_HUMAN  | 516 | 0   | 2   | 0   | 0   |
| Inositol 1,4,5-trisphosphate receptor type 1 OS=Homo sapiens GN=ITPR1 PE=1 SV=2            | ITPR1_HUMAN | 314 | 0   | 1   | 0   | 0   |
| Envoplakin OS=Homo sapiens GN=EVPL PE=1 SV=3                                               | EVPL_HUMAN  | 232 | 0   | 4   | 0   | 3   |
| ATP-binding cassette sub-family A member 5 OS=Homo sapiens GN=ABCA5 PE=2 SV=2              | ABCA5_HUMAN | 187 | 0   | 1   | 0   | 0   |
| Double-stranded RNA-specific adenosine deaminase OS=Homo sapiens GN=ADAR PE=1 SV=4         | DSRAD_HUMAN | 136 | 0   | 2   | 0   | 1   |
| Plakophilin-2 OS=Homo sapiens GN=PKP2 PE=1 SV=2                                            | PKP2_HUMAN  | 97  | 0   | 2   | 0   | 0   |
| Disks large-associated protein 5 OS=Homo sapiens GN=DLGAP5 PE=1 SV=2                       | DLGP5_HUMAN | 95  | 0   | 1   | 0   | 0   |
| Cell division cycle 5-like protein OS=Homo sapiens GN=CDC5L PE=1 SV=2                      | CDC5L_HUMAN | 92  | 0   | 1   | 0   | 0   |
| General transcription factor 3C polypeptide 4 OS=Homo sapiens GN=GTF3C4 PE=1 SV=2          | TF3C4_HUMAN | 92  | 0   | 1   | 0   | 0   |
| Interphotoreceptor matrix proteoglycan 1 OS=Homo sapiens GN=IMPG1 PE=1 SV=2                | IMPG1_HUMAN | 89  | 0   | 1   | 0   | 0   |
| Coiled-coil domain-containing protein 164 OS=Homo sapiens GN=CCDC164 PE=2 SV=2             | CC164_HUMAN | 87  | 0   | 1   | 0   | 0   |
| Cyclin-T1 OS=Homo sapiens GN=CCNT1 PE=1 SV=1                                               | CCNT1_HUMAN | 81  | 0   | 1   | 0   | 0   |
| A-kinase anchor protein 8-like OS=Homo sapiens GN=AKAP8L PE=1 SV=3                         | AKP8L_HUMAN | 72  | 0   | 1   | 0   | 0   |
| Serum albumin OS=Homo sapiens GN=ALB PE=1 SV=2                                             | ALBU_HUMAN  | 69  | 0   | 2   | 0   | 0   |
| Mitochondrial Rho GTPase 2 OS=Homo sapiens GN=RHOT2 PE=1 SV=2                              | MIRO2_HUMAN | 68  | 0   | 1   | 0   | 0   |
| Transketolase-like protein 1 OS=Homo sapiens GN=TKTL1 PE=1 SV=2                            | TKTL1_HUMAN | 65  | 0   | 1   | 0   | 0   |

|                                                                                            |             |     |    |    |    |    |
|--------------------------------------------------------------------------------------------|-------------|-----|----|----|----|----|
| Zinc finger protein 18 OS=Homo sapiens GN=ZNF18 PE=2 SV=2                                  | ZNF18_HUMAN | 62  | 0  | 1  | 0  | 0  |
| Katanin p60 ATPase-containing subunit A-like 2 OS=Homo sapiens GN=KATNAL2 PE=1 SV=3        | KATL2_HUMAN | 61  | 0  | 1  | 0  | 0  |
| Tyrosine-protein kinase Lyn OS=Homo sapiens GN=LYN PE=1 SV=3                               | LYN_HUMAN   | 59  | 0  | 3  | 0  | 0  |
| Keratin, type II cuticular Hb2 OS=Homo sapiens GN=KRT82 PE=1 SV=3                          | KRT82_HUMAN | 57  | 0  | 1  | 0  | 0  |
| Ethanolamine-phosphate phospho-lyase OS=Homo sapiens GN=AGXT2L1 PE=1 SV=1                  | AT2L1_HUMAN | 56  | 0  | 1  | 0  | 0  |
| Keratin, type II cuticular Hb3 OS=Homo sapiens GN=KRT83 PE=1 SV=2                          | KRT83_HUMAN | 54  | 0  | 1  | 0  | 0  |
| Cysteine desulfurase, mitochondrial OS=Homo sapiens GN=NFS1 PE=1 SV=3                      | NFS1_HUMAN  | 50  | 0  | 1  | 0  | 0  |
| Actin-related protein 3B OS=Homo sapiens GN=ACTR3B PE=2 SV=1                               | ARP3B_HUMAN | 48  | 0  | 1  | 0  | 0  |
| Protein lunapark OS=Homo sapiens GN=LNP PE=1 SV=2                                          | LNP_HUMAN   | 48  | 0  | 1  | 0  | 0  |
| Keratin, type I cuticular Ha1 OS=Homo sapiens GN=KRT31 PE=2 SV=3                           | K1H1_HUMAN  | 47  | 0  | 1  | 0  | 0  |
| Heterogeneous nuclear ribonucleoprotein D-like OS=Homo sapiens GN=HNRPDL PE=1 SV=3         | HNRDL_HUMAN | 46  | 0  | 4  | 0  | 2  |
| Cyclin-dependent kinase 9 OS=Homo sapiens GN=CDK9 PE=1 SV=3                                | CDK9_HUMAN  | 43  | 0  | 1  | 0  | 0  |
| ADP/ATP translocase 1 OS=Homo sapiens GN=SLC25A4 PE=1 SV=4                                 | ADT1_HUMAN  | 33  | 0  | 1  | 0  | 0  |
| ATP synthase subunit gamma, mitochondrial OS=Homo sapiens GN=ATP5C1 PE=1 SV=1              | ATPG_HUMAN  | 33  | 0  | 1  | 0  | 0  |
| RNA-binding protein Raly OS=Homo sapiens GN=RALY PE=1 SV=1                                 | RALY_HUMAN  | 32  | 0  | 3  | 0  | 2  |
| Apolipoprotein A-I OS=Homo sapiens GN=APOA1 PE=1 SV=1                                      | APOA1_HUMAN | 31  | 0  | 1  | 0  | 0  |
| Voltage-dependent anion-selective channel protein 3 OS=Homo sapiens GN=VDAC3 PE=1 SV=1     | VDAC3_HUMAN | 31  | 0  | 1  | 0  | 0  |
| Estradiol 17-beta-dehydrogenase 8 OS=Homo sapiens GN=HSD17B8 PE=1 SV=2                     | DHB8_HUMAN  | 27  | 0  | 1  | 0  | 0  |
| Carbonyl reductase family member 4 OS=Homo sapiens GN=CBR4 PE=1 SV=3                       | CBR4_HUMAN  | 25  | 0  | 1  | 0  | 0  |
| Dynein light chain 1, cytoplasmic OS=Homo sapiens GN=DYNLL1 PE=1 SV=1                      | DYL1_HUMAN  | 10  | 0  | 1  | 0  | 0  |
| Heterogeneous nuclear ribonucleoprotein H3 OS=Homo sapiens GN=HNRNPH3 PE=1 SV=2            | HNRH3_HUMAN | 37  | 0  | 3  | 0  | 2  |
| Keratin, type II cytoskeletal 8 OS=Homo sapiens GN=KRT8 PE=1 SV=7                          | K2C8_HUMAN  | 54  | 19 | 26 | 29 | 26 |
| Heterogeneous nuclear ribonucleoprotein U OS=Homo sapiens GN=HNRNPU PE=1 SV=6              | HNRPU_HUMAN | 91  | 8  | 23 | 15 | 23 |
| Peptidyl-prolyl cis-trans isomerase B OS=Homo sapiens GN=PPIB PE=1 SV=2                    | PPIB_HUMAN  | 24  | 3  | 0  | 5  | 0  |
| Serine/arginine-rich splicing factor 3 OS=Homo sapiens GN=SRSF3 PE=1 SV=1                  | SRSF3_HUMAN | 19  | 0  | 2  | 0  | 2  |
| Histone H4 OS=Homo sapiens GN=HIST1H4A PE=1 SV=2                                           | H4_HUMAN    | 11  | 0  | 2  | 0  | 2  |
| Keratin, type II cytoskeletal 75 OS=Homo sapiens GN=KRT75 PE=1 SV=2                        | K2C75_HUMAN | 60  | 1  | 1  | 1  | 1  |
| 26S protease regulatory subunit 7 OS=Homo sapiens GN=PSMC2 PE=1 SV=3                       | PS7_HUMAN   | 49  | 2  | 0  | 2  | 0  |
| Actin-related protein 2/3 complex subunit 1A OS=Homo sapiens GN=ARPC1A PE=1 SV=2           | ARC1A_HUMAN | 42  | 2  | 1  | 2  | 1  |
| Palmitoyl-protein thioesterase 1 OS=Homo sapiens GN=PPT1 PE=1 SV=1                         | PPT1_HUMAN  | 34  | 2  | 0  | 2  | 0  |
| 40S ribosomal protein S5 OS=Homo sapiens GN=RP55 PE=1 SV=4                                 | RS5_HUMAN   | 23  | 1  | 1  | 1  | 1  |
| 60S ribosomal protein L11 OS=Homo sapiens GN=RPL11 PE=1 SV=2                               | RL11_HUMAN  | 20  | 1  | 1  | 1  | 1  |
| Ras-related protein Rab-1B OS=Homo sapiens GN=RAB1B PE=1 SV=1                              | RAB1B_HUMAN | 22  | 1  | 0  | 1  | 0  |
| Coatomer subunit gamma-1 OS=Homo sapiens GN=COPG1 PE=1 SV=1                                | COPG1_HUMAN | 98  | 1  | 0  | 1  | 0  |
| 6-phosphofructokinase, liver type OS=Homo sapiens GN=PFKL PE=1 SV=6                        | K6PL_HUMAN  | 85  | 1  | 0  | 1  | 0  |
| Plastin-2 OS=Homo sapiens GN=LCP1 PE=1 SV=6                                                | PLSL_HUMAN  | 70  | 1  | 0  | 1  | 0  |
| N6-adenosine-methyltransferase 70 kDa subunit OS=Homo sapiens GN=METT13 PE=1 SV=2          | MTA70_HUMAN | 64  | 1  | 1  | 1  | 1  |
| Isocitrate dehydrogenase [NADP], mitochondrial OS=Homo sapiens GN=IDH2 PE=1 SV=2           | IDHP_HUMAN  | 51  | 1  | 0  | 1  | 0  |
| DnaJ homolog subfamily B member 11 OS=Homo sapiens GN=DNAJB11 PE=1 SV=1                    | DJB11_HUMAN | 41  | 1  | 0  | 1  | 0  |
| L-lactate dehydrogenase A-like 6A OS=Homo sapiens GN=LDHAL6A PE=2 SV=1                     | LDH6A_HUMAN | 37  | 1  | 0  | 1  | 0  |
| Enoyl-CoA delta isomerase 1, mitochondrial OS=Homo sapiens GN=ECI1 PE=1 SV=1               | ECI1_HUMAN  | 33  | 1  | 0  | 1  | 0  |
| Surfeit locus protein 4 OS=Homo sapiens GN=SURF4 PE=1 SV=3                                 | SURF4_HUMAN | 30  | 1  | 0  | 1  | 0  |
| Poly [ADP-ribose] polymerase 1 OS=Homo sapiens GN=PARP1 PE=1 SV=4                          | PARP1_HUMAN | 113 | 1  | 0  | 1  | 0  |
| Glypican-1 OS=Homo sapiens GN=GPC1 PE=1 SV=2                                               | GPC1_HUMAN  | 62  | 1  | 1  | 1  | 1  |
| Protein SEC13 homolog OS=Homo sapiens GN=SEC13 PE=1 SV=3                                   | SEC13_HUMAN | 36  | 1  | 1  | 1  | 1  |
| Epiplakin OS=Homo sapiens GN=EPPK1 PE=1 SV=2                                               | EPIPL_HUMAN | 556 | 14 | 6  | 7  | 8  |
| Heat shock 70 kDa protein 1A/1B OS=Homo sapiens GN=HSPA1A PE=1 SV=5                        | HSP71_HUMAN | 70  | 4  | 4  | 7  | 3  |
| Keratin, type II cuticular Hb1 OS=Homo sapiens GN=KRT81 PE=1 SV=3                          | KRT81_HUMAN | 55  | 0  | 3  | 0  | 0  |
| Src substrate cortactin OS=Homo sapiens GN=CTTN PE=1 SV=2                                  | SRC8_HUMAN  | 62  | 0  | 9  | 2  | 7  |
| Actin-related protein 2/3 complex subunit 1B OS=Homo sapiens GN=ARPC1B PE=1 SV=3           | ARC1B_HUMAN | 41  | 2  | 3  | 2  | 4  |
| Stomatin-like protein 2, mitochondrial OS=Homo sapiens GN=STOML2 PE=1 SV=1                 | STML2_HUMAN | 39  | 0  | 5  | 0  | 5  |
| Heterogeneous nuclear ribonucleoprotein A1-like 2 OS=Homo sapiens GN=HNRNPA1L2 PE=2        | RA1L2_HUMAN | 34  | 0  | 6  | 0  | 7  |
| Glyceraldehyde-3-phosphate dehydrogenase OS=Homo sapiens GN=GAPDH PE=1 SV=3                | G3P_HUMAN   | 36  | 4  | 1  | 10 | 4  |
| 40S ribosomal protein S4, X isoform OS=Homo sapiens GN=RP54X PE=1 SV=2                     | RS4X_HUMAN  | 30  | 0  | 2  | 1  | 1  |
| Contactin-1 OS=Homo sapiens GN=CNTN1 PE=1 SV=1                                             | CNTN1_HUMAN | 113 | 0  | 0  | 0  | 0  |
| 40S ribosomal protein S14 OS=Homo sapiens GN=RP514 PE=1 SV=3                               | RS14_HUMAN  | 16  | 0  | 1  | 1  | 1  |
| Small nuclear ribonucleoprotein Sm D1 OS=Homo sapiens GN=SNRPD1 PE=1 SV=1                  | SMD1_HUMAN  | 13  | 0  | 1  | 1  | 1  |
| Histone H2B type 1-B OS=Homo sapiens GN=HIST1H2BB PE=1 SV=2                                | H2B1B_HUMAN | 14  | 0  | 0  | 1  | 0  |
| 60S ribosomal protein L27 OS=Homo sapiens GN=RPL27 PE=1 SV=2                               | RL27_HUMAN  | 16  | 0  | 0  | 0  | 0  |
| Heterogeneous nuclear ribonucleoprotein A1 OS=Homo sapiens GN=HNRNPA1 PE=1 SV=5            | ROA1_HUMAN  | 39  | 0  | 2  | 4  | 2  |
| Guanine nucleotide-binding protein (Gi) subunit alpha-2 OS=Homo sapiens GN=GNAI2 PE=1 SV=1 | GNAI2_HUMAN | 40  | 0  | 1  | 2  | 1  |
| 40S ribosomal protein S15a OS=Homo sapiens GN=RP515A PE=1 SV=2                             | RS15A_HUMAN | 15  | 0  | 0  | 0  | 0  |
| 60S ribosomal protein L22 OS=Homo sapiens GN=RPL22 PE=1 SV=2                               | RL22_HUMAN  | 15  | 0  | 0  | 1  | 0  |
| 60S ribosomal protein L10 OS=Homo sapiens GN=RPL10 PE=1 SV=4                               | RL10_HUMAN  | 25  | 0  | 0  | 1  | 0  |
| 60S ribosomal protein L26-like 1 OS=Homo sapiens GN=RPL26L1 PE=1 SV=1                      | RL26L_HUMAN | 17  | 0  | 0  | 0  | 0  |
| Myoferlin OS=Homo sapiens GN=MYOF PE=1 SV=1                                                | MYOF_HUMAN  | 235 | 1  | 3  | 4  | 2  |
| Sarcoplasmic/endoplasmic reticulum calcium ATPase 2 OS=Homo sapiens GN=ATP2A2 PE=1 SV=1    | AT2A2_HUMAN | 115 | 1  | 1  | 0  | 2  |
| Catenin alpha-1 OS=Homo sapiens GN=CTNNA1 PE=1 SV=1                                        | CTNA1_HUMAN | 100 | 1  | 7  | 4  | 4  |
| Filamin-B OS=Homo sapiens GN=FLNB PE=1 SV=2                                                | FLNB_HUMAN  | 278 | 3  | 37 | 8  | 40 |
| Heterogeneous nuclear ribonucleoprotein L OS=Homo sapiens GN=HNRNPL PE=1 SV=2              | HNRPL_HUMAN | 64  | 1  | 8  | 4  | 10 |
| ADP-ribosylation factor-like protein 1 OS=Homo sapiens GN=ARL1 PE=1 SV=1                   | ARL1_HUMAN  | 20  | 1  | 0  | 0  | 1  |
| Putative heat shock protein HSP 90-beta 2 OS=Homo sapiens GN=HSP90AB2P PE=1 SV=2           | H90B2_HUMAN | 44  | 1  | 1  | 5  | 1  |
| 14-3-3 protein zeta/delta OS=Homo sapiens GN=YWHAZ PE=1 SV=1                               | 1433Z_HUMAN | 28  | 1  | 0  | 3  | 0  |
| Brain acid soluble protein 1 OS=Homo sapiens GN=BASP1 PE=1 SV=2                            | BASP1_HUMAN | 23  | 0  | 0  | 0  | 0  |
| Aldo-keto reductase family 1 member B10 OS=Homo sapiens GN=AKR1B10 PE=1 SV=2               | AK18A_HUMAN | 36  | 0  | 0  | 8  | 0  |
| Transmembrane emp24 domain-containing protein 10 OS=Homo sapiens GN=TMED10 PE=1 SV=1       | TMEDA_HUMAN | 25  | 0  | 1  | 2  | 1  |
| Ras-related protein Rab-5C OS=Homo sapiens GN=RAB5C PE=1 SV=2                              | RAB5C_HUMAN | 23  | 0  | 0  | 0  | 0  |
| Proliferating cell nuclear antigen OS=Homo sapiens GN=PCNA PE=1 SV=1                       | PCNA_HUMAN  | 29  | 0  | 0  | 0  | 0  |
| 60S ribosomal protein L19 OS=Homo sapiens GN=RPL19 PE=1 SV=1                               | RL19_HUMAN  | 23  | 0  | 0  | 0  | 0  |
| FAS-associated factor 2 OS=Homo sapiens GN=FAF2 PE=1 SV=2                                  | FAF2_HUMAN  | 53  | 0  | 0  | 0  | 0  |
| ATP-dependent RNA helicase DDX3X OS=Homo sapiens GN=DDX3X PE=1 SV=3                        | DDX3X_HUMAN | 73  | 0  | 0  | 0  | 0  |

|                                                                                                  |             |     |     |     |     |     |
|--------------------------------------------------------------------------------------------------|-------------|-----|-----|-----|-----|-----|
| Adipocyte plasma membrane-associated protein OS=Homo sapiens GN=APMAP PE=1 SV=2                  | APMAP_HUMAN | 46  | 0   | 0   | 0   | 0   |
| Transmembrane glycoprotein NMB OS=Homo sapiens GN=GPNMB PE=1 SV=2                                | GPNMB_HUMAN | 64  | 0   | 0   | 0   | 0   |
| 6-phosphofructokinase type C OS=Homo sapiens GN=PFKP PE=1 SV=2                                   | K6PP_HUMAN  | 86  | 2   | 0   | 3   | 0   |
| Heat shock 70 kDa protein 6 OS=Homo sapiens GN=HSPA6 PE=1 SV=2                                   | HSP76_HUMAN | 71  | 1   | 1   | 2   | 1   |
| Tubulin alpha-4A chain OS=Homo sapiens GN=TUBA4A PE=1 SV=1                                       | TBA4A_HUMAN | 50  | 1   | 1   | 2   | 1   |
| POTE ankyrin domain family member E OS=Homo sapiens GN=POTEE PE=1 SV=3                           | POTEE_HUMAN | 121 | 1   | 1   | 2   | 1   |
| DNA damage-binding protein 1 OS=Homo sapiens GN=DDB1 PE=1 SV=1                                   | DDB1_HUMAN  | 127 | 1   | 0   | 3   | 0   |
| Leucine-rich repeat flightless-interacting protein 2 OS=Homo sapiens GN=LRRFIP2 PE=1 SV=1        | LRRF2_HUMAN | 82  | 1   | 3   | 2   | 3   |
| ATP-dependent RNA helicase DDX39A OS=Homo sapiens GN=DDX39A PE=1 SV=2                            | DX39A_HUMAN | 49  | 1   | 0   | 2   | 0   |
| Nuclease-sensitive element-binding protein 1 OS=Homo sapiens GN=YBX1 PE=1 SV=3                   | YBOX1_HUMAN | 36  | 0   | 0   | 1   | 0   |
| Heterogeneous nuclear ribonucleoprotein U-like protein 1 OS=Homo sapiens GN=HNRNPUL1             | HNRL1_HUMAN | 96  | 0   | 2   | 2   | 2   |
| 60S ribosomal protein L28 OS=Homo sapiens GN=RPL28 PE=1 SV=3                                     | RL28_HUMAN  | 16  | 0   | 0   | 0   | 0   |
| 60S ribosomal protein L27a OS=Homo sapiens GN=RPL27A PE=1 SV=2                                   | RL27A_HUMAN | 17  | 0   | 0   | 1   | 0   |
| Coatomer subunit epsilon OS=Homo sapiens GN=COPE PE=1 SV=3                                       | COPE_HUMAN  | 34  | 0   | 0   | 2   | 0   |
| Microsomal glutathione S-transferase 1 OS=Homo sapiens GN=MGST1 PE=1 SV=1                        | MGST1_HUMAN | 18  | 0   | 0   | 0   | 0   |
| Very-long-chain (3R)-3-hydroxyacyl-[acyl-carrier protein] dehydratase 3 OS=Homo sapiens GN=HACD3 | HACD3_HUMAN | 43  | 0   | 0   | 1   | 0   |
| Histone H1.1 OS=Homo sapiens GN=HIST1H1A PE=1 SV=3                                               | H11_HUMAN   | 22  | 0   | 0   | 0   | 0   |
| Cytoskeleton-associated protein 4 OS=Homo sapiens GN=CKAP4 PE=1 SV=2                             | CKAP4_HUMAN | 66  | 0   | 0   | 0   | 0   |
| Epoxide hydrolase 1 OS=Homo sapiens GN=EPHX1 PE=1 SV=1                                           | HYEP_HUMAN  | 53  | 0   | 0   | 1   | 0   |
| B-cell receptor-associated protein 31 OS=Homo sapiens GN=BCAP31 PE=1 SV=3                        | BAP31_HUMAN | 28  | 0   | 0   | 0   | 0   |
| Poly(U)-binding-splicing factor PUF60 OS=Homo sapiens GN=PUF60 PE=1 SV=1                         | PUF60_HUMAN | 60  | 0   | 0   | 1   | 0   |
| Atlastin-3 OS=Homo sapiens GN=ATL3 PE=1 SV=1                                                     | ATLA3_HUMAN | 61  | 0   | 0   | 0   | 0   |
| Insulin-like growth factor 2 mRNA-binding protein 1 OS=Homo sapiens GN=IGF2BP1 PE=1 SV=1         | IF2B1_HUMAN | 63  | 0   | 0   | 1   | 0   |
| Sphingosine-1-phosphate lyase 1 OS=Homo sapiens GN=SGPL1 PE=1 SV=3                               | SGPL1_HUMAN | 64  | 0   | 0   | 0   | 0   |
| Translocin-associated protein subunit alpha OS=Homo sapiens GN=SSR1 PE=1 SV=3                    | SSRA_HUMAN  | 32  | 0   | 0   | 0   | 0   |
| Very-long-chain enoyl-CoA reductase OS=Homo sapiens GN=TECR PE=1 SV=1                            | TECR_HUMAN  | 36  | 0   | 0   | 0   | 0   |
| Guanine nucleotide-binding protein subunit beta-4 OS=Homo sapiens GN=GNB4 PE=1 SV=3              | GBB4_HUMAN  | 38  | 0   | 0   | 0   | 0   |
| Protein kinase C alpha type OS=Homo sapiens GN=PRKCA PE=1 SV=4                                   | KPCA_HUMAN  | 77  | 0   | 0   | 0   | 0   |
| Phosphate carrier protein, mitochondrial OS=Homo sapiens GN=SLC25A3 PE=1 SV=2                    | MPCP_HUMAN  | 40  | 0   | 0   | 0   | 0   |
| Complement decay-accelerating factor OS=Homo sapiens GN=CD55 PE=1 SV=4                           | DAF_HUMAN   | 41  | 0   | 0   | 0   | 0   |
| Vacuole membrane protein 1 OS=Homo sapiens GN=VMP1 PE=1 SV=1                                     | VMP1_HUMAN  | 46  | 0   | 0   | 0   | 0   |
| DNA mismatch repair protein Msh2 OS=Homo sapiens GN=MSH2 PE=1 SV=1                               | MSH2_HUMAN  | 105 | 0   | 0   | 0   | 0   |
| Peripherin OS=Homo sapiens GN=PRPH PE=1 SV=2                                                     | PERI_HUMAN  | 54  | 0   | 0   | 0   | 0   |
| Guanine nucleotide-binding protein G(s) subunit alpha isoforms XLas OS=Homo sapiens GN=GNAS1     | GNAS1_HUMAN | 111 | 0   | 0   | 0   | 0   |
| Serine beta-lactamase-like protein LACTB, mitochondrial OS=Homo sapiens GN=LACTB PE=1 SV=1       | LACTB_HUMAN | 61  | 0   | 0   | 0   | 0   |
| Nucleolar protein 56 OS=Homo sapiens GN=NOP56 PE=1 SV=4                                          | NOP56_HUMAN | 66  | 0   | 0   | 0   | 0   |
| Golgi apparatus protein 1 OS=Homo sapiens GN=GLG1 PE=1 SV=2                                      | GSLG1_HUMAN | 135 | 0   | 0   | 0   | 0   |
| Histidine ammonia-lyase OS=Homo sapiens GN=HAL PE=1 SV=1                                         | HUTH_HUMAN  | 73  | 0   | 0   | 0   | 0   |
| CD109 antigen OS=Homo sapiens GN=CD109 PE=1 SV=2                                                 | CD109_HUMAN | 162 | 0   | 1   | 0   | 1   |
| RNA-binding protein 28 OS=Homo sapiens GN=RBM28 PE=1 SV=3                                        | RBM28_HUMAN | 86  | 0   | 0   | 0   | 0   |
| Thioredoxin domain-containing protein 16 OS=Homo sapiens GN=TXNDC16 PE=2 SV=4                    | TXD16_HUMAN | 94  | 0   | 0   | 0   | 0   |
| WD repeat-containing protein 36 OS=Homo sapiens GN=WDR36 PE=1 SV=1                               | WDR36_HUMAN | 105 | 0   | 0   | 0   | 0   |
| Kinesin heavy chain isoform 5A OS=Homo sapiens GN=KIF5A PE=1 SV=2                                | KIF5A_HUMAN | 117 | 0   | 0   | 0   | 0   |
| Importin-4 OS=Homo sapiens GN=IPO4 PE=1 SV=2                                                     | IPO4_HUMAN  | 119 | 0   | 0   | 0   | 0   |
| POTE ankyrin domain family member F OS=Homo sapiens GN=POTEF PE=1 SV=2                           | POTEF_HUMAN | 121 | 0   | 0   | 0   | 0   |
| Exportin-7 OS=Homo sapiens GN=XPO7 PE=1 SV=3                                                     | XPO7_HUMAN  | 124 | 0   | 0   | 0   | 0   |
| Protein diaphanous homolog 2 OS=Homo sapiens GN=DIAPH2 PE=1 SV=1                                 | DIAP2_HUMAN | 126 | 0   | 0   | 0   | 0   |
| Translational activator GCN1 OS=Homo sapiens GN=GCN1L1 PE=1 SV=6                                 | GCN1L_HUMAN | 293 | 0   | 0   | 0   | 0   |
| Nucleoporin NUP188 homolog OS=Homo sapiens GN=NUP188 PE=1 SV=1                                   | NU188_HUMAN | 196 | 0   | 0   | 0   | 0   |
| Protein RRP5 homolog OS=Homo sapiens GN=PDCC11 PE=1 SV=3                                         | RRP5_HUMAN  | 209 | 0   | 0   | 0   | 0   |
| Nucleolar pre-ribosomal-associated protein 1 OS=Homo sapiens GN=URB1 PE=1 SV=4                   | NPA1P_HUMAN | 254 | 0   | 0   | 0   | 0   |
| StAR-related lipid transfer protein 9 OS=Homo sapiens GN=STARD9 PE=1 SV=3                        | STAR9_HUMAN | 516 | 0   | 0   | 0   | 0   |
| E3 ubiquitin-protein ligase RNF213 OS=Homo sapiens GN=RNF213 PE=1 SV=3                           | RN213_HUMAN | 591 | 0   | 0   | 0   | 0   |
| 40S ribosomal protein S11 OS=Homo sapiens GN=RPS11 PE=1 SV=3                                     | RS11_HUMAN  | 18  | 0   | 0   | 2   | 0   |
| Protein S100-A10 OS=Homo sapiens GN=S100A10 PE=1 SV=2                                            | S10AA_HUMAN | 11  | 0   | 0   | 1   | 0   |
| 40S ribosomal protein S13 OS=Homo sapiens GN=RPS13 PE=1 SV=2                                     | RS13_HUMAN  | 17  | 0   | 0   | 0   | 0   |
| Large neutral amino acids transporter small subunit 1 OS=Homo sapiens GN=SLC7A5 PE=1 SV=1        | LAT1_HUMAN  | 55  | 0   | 0   | 0   | 0   |
| Leucine-rich repeat-containing protein 59 OS=Homo sapiens GN=LRRCS9 PE=1 SV=1                    | LRC59_HUMAN | 35  | 0   | 0   | 0   | 0   |
| 60S ribosomal protein L9 OS=Homo sapiens GN=RPL9 PE=1 SV=1                                       | RL9_HUMAN   | 22  | 0   | 0   | 1   | 0   |
| Nucleolar RNA helicase 2 OS=Homo sapiens GN=DDX21 PE=1 SV=5                                      | DDX21_HUMAN | 87  | 0   | 1   | 1   | 1   |
| Myosin-9 OS=Homo sapiens GN=MYH9 PE=1 SV=4                                                       | MYH9_HUMAN  | 227 | 253 | 188 | 259 | 189 |
| Ras GTPase-activating-like protein IQGAP1 OS=Homo sapiens GN=IQGAP1 PE=1 SV=1                    | IQGA1_HUMAN | 189 | 18  | 18  | 24  | 29  |
| Nucleolin OS=Homo sapiens GN=NCL PE=1 SV=3                                                       | NUCL_HUMAN  | 77  | 9   | 13  | 16  | 16  |
| Pyruvate kinase isozymes M1/M2 OS=Homo sapiens GN=PKM PE=1 SV=4                                  | KPYM_HUMAN  | 58  | 8   | 1   | 14  | 3   |
| Guanine nucleotide-binding protein G(i)/G(s)/G(t) subunit beta-1 OS=Homo sapiens GN=GNE          | GBB1_HUMAN  | 37  | 3   | 2   | 8   | 5   |
| 40S ribosomal protein SA OS=Homo sapiens GN=RPSA PE=1 SV=4                                       | RSSA_HUMAN  | 33  | 3   | 4   | 4   | 5   |
| Cathepsin D OS=Homo sapiens GN=CTSD PE=1 SV=1                                                    | CATD_HUMAN  | 45  | 2   | 2   | 6   | 0   |
| Delta(3,5)-Delta(2,4)-dienoyl-CoA isomerase, mitochondrial OS=Homo sapiens GN=ECH1 PE=1          | ECH1_HUMAN  | 36  | 1   | 1   | 2   | 0   |
| Annexin A1 OS=Homo sapiens GN=ANXA1 PE=1 SV=2                                                    | ANXA1_HUMAN | 39  | 0   | 1   | 1   | 0   |
| Cofilin-1 OS=Homo sapiens GN=CFL1 PE=1 SV=3                                                      | COF1_HUMAN  | 19  | 0   | 1   | 6   | 0   |
| Eukaryotic translation initiation factor 3 subunit B OS=Homo sapiens GN=EIF3B PE=1 SV=3          | EIF3B_HUMAN | 92  | 0   | 2   | 3   | 1   |
| Myosin-10 OS=Homo sapiens GN=MYH10 PE=1 SV=3                                                     | MYH10_HUMAN | 229 | 75  | 49  | 78  | 56  |
| Polyadenylate-binding protein 1 OS=Homo sapiens GN=PABPC1 PE=1 SV=2                              | PABP1_HUMAN | 71  | 4   | 5   | 6   | 6   |
| Heterogeneous nuclear ribonucleoprotein A3 OS=Homo sapiens GN=HNRNPA3 PE=1 SV=2                  | ROA3_HUMAN  | 40  | 1   | 5   | 2   | 10  |
| 40S ribosomal protein S19 OS=Homo sapiens GN=RPS19 PE=1 SV=2                                     | RS19_HUMAN  | 16  | 0   | 1   | 1   | 0   |
| Hypoxia up-regulated protein 1 OS=Homo sapiens GN=HYOU1 PE=1 SV=1                                | HYOU1_HUMAN | 111 | 7   | 0   | 10  | 0   |
| Protein disulfide-isomerase A3 OS=Homo sapiens GN=PDIA3 PE=1 SV=4                                | PDIA3_HUMAN | 57  | 5   | 0   | 16  | 0   |
| GTP-binding nuclear protein Ran OS=Homo sapiens GN=RAN PE=1 SV=3                                 | RAN_HUMAN   | 24  | 2   | 0   | 3   | 0   |
| Adenosylhomocysteinase OS=Homo sapiens GN=AHCY PE=1 SV=4                                         | SAHH_HUMAN  | 48  | 2   | 0   | 5   | 0   |
| 6-phosphogluconate dehydrogenase, decarboxylating OS=Homo sapiens GN=PGD PE=1 SV=3               | 6PGD_HUMAN  | 53  | 2   | 0   | 8   | 0   |
| Glucosidase 2 subunit beta OS=Homo sapiens GN=PRKCSH PE=1 SV=2                                   | GLUZB_HUMAN | 59  | 2   | 0   | 3   | 0   |

|                                                                                                        |              |     |   |   |    |   |
|--------------------------------------------------------------------------------------------------------|--------------|-----|---|---|----|---|
| Protein disulfide-isomerase A4 OS=Homo sapiens GN=PDIA4 PE=1 SV=2                                      | PDIA4_HUMAN  | 73  | 2 | 0 | 7  | 0 |
| Transketolase OS=Homo sapiens GN=TKT PE=1 SV=3                                                         | TKT_HUMAN    | 68  | 1 | 0 | 13 | 0 |
| Heat shock protein HSP 90-alpha OS=Homo sapiens GN=HSP90AA1 PE=1 SV=5                                  | HSP90A_HUMAN | 85  | 1 | 2 | 8  | 2 |
| Ezrin OS=Homo sapiens GN=EZR PE=1 SV=4                                                                 | EZR1_HUMAN   | 69  | 1 | 0 | 13 | 0 |
| Peptidyl-prolyl cis-trans isomerase A OS=Homo sapiens GN=PPIA PE=1 SV=2                                | PPIA_HUMAN   | 18  | 1 | 0 | 3  | 0 |
| UDP-glucose 6-dehydrogenase OS=Homo sapiens GN=UGDH PE=1 SV=1                                          | UGDH_HUMAN   | 55  | 1 | 0 | 6  | 0 |
| Spliceosome RNA helicase DDX39B OS=Homo sapiens GN=DDX39B PE=1 SV=1                                    | DX39B_HUMAN  | 49  | 1 | 0 | 3  | 0 |
| 40S ribosomal protein S8 OS=Homo sapiens GN=RPS8 PE=1 SV=2                                             | RS8_HUMAN    | 24  | 0 | 1 | 1  | 1 |
| Guanine nucleotide-binding protein G(I)/G(S)/G(T) subunit beta-2 OS=Homo sapiens GN=GNEF               | GBB2_HUMAN   | 37  | 0 | 0 | 1  | 0 |
| Putative heat shock protein HSP 90-alpha A5 OS=Homo sapiens GN=HSP90AA5P PE=1 SV=1                     | HS905_HUMAN  | 39  | 0 | 0 | 1  | 0 |
| Glucose-6-phosphate isomerase OS=Homo sapiens GN=GPI PE=1 SV=4                                         | G6PI_HUMAN   | 63  | 0 | 0 | 3  | 0 |
| CD48 antigen OS=Homo sapiens GN=CD48 PE=1 SV=2                                                         | CD48_HUMAN   | 28  | 0 | 0 | 0  | 0 |
| 14-3-3 protein beta/alpha OS=Homo sapiens GN=YWHAB PE=1 SV=3                                           | 1433B_HUMAN  | 28  | 0 | 0 | 2  | 0 |
| Serine hydroxymethyltransferase, mitochondrial OS=Homo sapiens GN=SHMT2 PE=1 SV=3                      | GLYM_HUMAN   | 56  | 0 | 0 | 0  | 0 |
| Type I iodothyronine deiodinase OS=Homo sapiens GN=DIO1 PE=2 SV=3                                      | IOD1_HUMAN   | 29  | 0 | 0 | 0  | 0 |
| LIM and SH3 domain protein 1 OS=Homo sapiens GN=LASP1 PE=1 SV=2                                        | LASP1_HUMAN  | 30  | 0 | 0 | 0  | 0 |
| Elongation factor 2 OS=Homo sapiens GN=EEF2 PE=1 SV=4                                                  | EF2_HUMAN    | 95  | 0 | 0 | 7  | 0 |
| Thioredoxin reductase 1, cytoplasmic OS=Homo sapiens GN=TXNRD1 PE=1 SV=3                               | TRXR1_HUMAN  | 71  | 0 | 0 | 3  | 0 |
| Aldose reductase OS=Homo sapiens GN=AKR1B1 PE=1 SV=3                                                   | ALDR_HUMAN   | 36  | 0 | 0 | 0  | 0 |
| DNA-(apurinic or apyrimidinic site) lyase OS=Homo sapiens GN=APEX1 PE=1 SV=2                           | APEX1_HUMAN  | 36  | 0 | 0 | 0  | 0 |
| Malate dehydrogenase, cytoplasmic OS=Homo sapiens GN=MDH1 PE=1 SV=4                                    | MDHC_HUMAN   | 36  | 0 | 0 | 1  | 0 |
| Reticulocalbin-2 OS=Homo sapiens GN=RCN2 PE=1 SV=1                                                     | RCN2_HUMAN   | 37  | 0 | 0 | 1  | 0 |
| Heat shock protein 75 kDa, mitochondrial OS=Homo sapiens GN=TRAP1 PE=1 SV=3                            | TRAP1_HUMAN  | 80  | 0 | 0 | 1  | 0 |
| Death-associated protein kinase 1 OS=Homo sapiens GN=DAPK1 PE=1 SV=6                                   | DAPK1_HUMAN  | 160 | 0 | 0 | 0  | 0 |
| Protein arginine N-methyltransferase 1 OS=Homo sapiens GN=PRMT1 PE=1 SV=2                              | ANM1_HUMAN   | 42  | 0 | 0 | 1  | 0 |
| Plasminogen activator inhibitor 1 RNA-binding protein OS=Homo sapiens GN=SERBP1 PE=1 SV=1              | PAIRB_HUMAN  | 45  | 0 | 0 | 0  | 0 |
| DNA replication licensing factor MCM3 OS=Homo sapiens GN=MCM3 PE=1 SV=3                                | MCM3_HUMAN   | 91  | 0 | 0 | 2  | 0 |
| Serpin H1 OS=Homo sapiens GN=SERPINH1 PE=1 SV=2                                                        | SERPH_HUMAN  | 46  | 0 | 0 | 3  | 0 |
| NF-kappa-B-activating protein OS=Homo sapiens GN=NKAP PE=1 SV=1                                        | NKAP_HUMAN   | 47  | 0 | 1 | 0  | 1 |
| Splicing factor 3A subunit 2 OS=Homo sapiens GN=SF3A2 PE=1 SV=2                                        | SF3A2_HUMAN  | 49  | 0 | 0 | 1  | 0 |
| Rab GDP dissociation inhibitor alpha OS=Homo sapiens GN=GDI1 PE=1 SV=2                                 | GDIA_HUMAN   | 51  | 0 | 0 | 1  | 0 |
| Citrate synthase, mitochondrial OS=Homo sapiens GN=CS PE=1 SV=2                                        | CISY_HUMAN   | 52  | 0 | 0 | 1  | 0 |
| Ubiquitin-like modifier-activating enzyme 1 OS=Homo sapiens GN=UBA1 PE=1 SV=3                          | UBA1_HUMAN   | 118 | 0 | 0 | 3  | 0 |
| 1,25-dihydroxyvitamin D(3) 24-hydroxylase, mitochondrial OS=Homo sapiens GN=CYP24A1 P                  | CP24A_HUMAN  | 59  | 0 | 0 | 0  | 0 |
| Cleavage and polyadenylation specificity factor subunit 6 OS=Homo sapiens GN=CPSF6 PE=1 SV=2           | CPSF6_HUMAN  | 59  | 0 | 0 | 0  | 0 |
| Zinc finger protein 697 OS=Homo sapiens GN=ZNF697 PE=2 SV=2                                            | ZN697_HUMAN  | 60  | 0 | 0 | 0  | 0 |
| ATP-citrate synthase OS=Homo sapiens GN=ACLY PE=1 SV=3                                                 | ACLY_HUMAN   | 121 | 0 | 0 | 0  | 0 |
| Copine-2 OS=Homo sapiens GN=CPNE2 PE=1 SV=3                                                            | CPNE2_HUMAN  | 61  | 0 | 0 | 0  | 0 |
| Moesin OS=Homo sapiens GN=MSN PE=1 SV=3                                                                | MOES_HUMAN   | 68  | 0 | 0 | 0  | 0 |
| Rabphilin-3A OS=Homo sapiens GN=RP3A PE=1 SV=1                                                         | RP3A_HUMAN   | 77  | 0 | 0 | 0  | 0 |
| Caprin-1 OS=Homo sapiens GN=CAPRIN1 PE=1 SV=2                                                          | CAPR1_HUMAN  | 78  | 0 | 0 | 0  | 0 |
| Talin-1 OS=Homo sapiens GN=TLN1 PE=1 SV=3                                                              | TLN1_HUMAN   | 270 | 0 | 0 | 0  | 0 |
| DNA replication licensing factor MCM4 OS=Homo sapiens GN=MCM4 PE=1 SV=5                                | MCM4_HUMAN   | 97  | 0 | 0 | 0  | 0 |
| Phosphofurin acidic cluster sorting protein 2 OS=Homo sapiens GN=PACS2 PE=1 SV=3                       | PACS2_HUMAN  | 98  | 0 | 0 | 0  | 0 |
| Ephrin type-A receptor 2 OS=Homo sapiens GN=EPHA2 PE=1 SV=2                                            | EPHA2_HUMAN  | 108 | 0 | 0 | 1  | 0 |
| Vinculin OS=Homo sapiens GN=VCL PE=1 SV=4                                                              | VINC_HUMAN   | 124 | 0 | 0 | 0  | 0 |
| Cytospin-A OS=Homo sapiens GN=SPECC1L PE=1 SV=2                                                        | CYTSA_HUMAN  | 125 | 0 | 4 | 5  | 4 |
| Kinesin-like protein KIF1A OS=Homo sapiens GN=KIF1A PE=1 SV=2                                          | KIF1A_HUMAN  | 191 | 0 | 0 | 0  | 0 |
| Chromodomain-helicase-DNA-binding protein 3 OS=Homo sapiens GN=CHD3 PE=1 SV=3                          | CHD3_HUMAN   | 227 | 0 | 0 | 0  | 0 |
| Filamin-C OS=Homo sapiens GN=FLNC PE=1 SV=3                                                            | FLNC_HUMAN   | 291 | 0 | 0 | 0  | 0 |
| E3 ubiquitin-protein ligase HUWE1 OS=Homo sapiens GN=HUWE1 PE=1 SV=3                                   | HUWE1_HUMAN  | 482 | 0 | 0 | 0  | 0 |
| Protocadherin Fat 1 OS=Homo sapiens GN=FAT1 PE=1 SV=2                                                  | FAT1_HUMAN   | 506 | 0 | 0 | 0  | 0 |
| Protein AHNK2 OS=Homo sapiens GN=AHNK2 PE=1 SV=2                                                       | AHNK2_HUMAN  | 617 | 0 | 0 | 0  | 0 |
| Heat shock-related 70 kDa protein 2 OS=Homo sapiens GN=HSPA2 PE=1 SV=1                                 | HSP72_HUMAN  | 70  | 2 | 4 | 3  | 4 |
| Desmin OS=Homo sapiens GN=DES PE=1 SV=3                                                                | DESM_HUMAN   | 54  | 1 | 2 | 3  | 2 |
| 26S protease regulatory subunit 8 OS=Homo sapiens GN=PSMC5 PE=1 SV=1                                   | PRS8_HUMAN   | 46  | 1 | 0 | 1  | 1 |
| Galectin-1 OS=Homo sapiens GN=LGALS1 PE=1 SV=2                                                         | LEG1_HUMAN   | 15  | 0 | 0 | 1  | 0 |
| T-complex protein 1 subunit gamma OS=Homo sapiens GN=CCT3 PE=1 SV=4                                    | TCGP_HUMAN   | 61  | 2 | 0 | 2  | 1 |
| T-complex protein 1 subunit alpha OS=Homo sapiens GN=TCP1 PE=1 SV=1                                    | TCPA_HUMAN   | 60  | 1 | 1 | 3  | 1 |
| Heterogeneous nuclear ribonucleoprotein H2 OS=Homo sapiens GN=HNRNPH2 PE=1 SV=1                        | HNRH2_HUMAN  | 49  | 1 | 0 | 1  | 1 |
| 26S proteasome non-ATPase regulatory subunit 12 OS=Homo sapiens GN=PSMD12 PE=1 SV=1                    | PSD12_HUMAN  | 53  | 1 | 0 | 2  | 0 |
| Pre-mRNA-processing factor 6 OS=Homo sapiens GN=PRPF6 PE=1 SV=1                                        | PRP6_HUMAN   | 107 | 1 | 4 | 1  | 5 |
| Guanine nucleotide-binding protein-like 3 OS=Homo sapiens GN=GNL3 PE=1 SV=2                            | GNL3_HUMAN   | 62  | 1 | 0 | 1  | 1 |
| 40S ribosomal protein S26 OS=Homo sapiens GN=RPS26 PE=1 SV=3                                           | RS26_HUMAN   | 13  | 0 | 0 | 0  | 0 |
| Histone H2A type 1-B/E OS=Homo sapiens GN=HIST1H2AB PE=1 SV=2                                          | H2A1B_HUMAN  | 14  | 0 | 0 | 0  | 0 |
| 60S ribosomal protein L21 OS=Homo sapiens GN=RPL21 PE=1 SV=2                                           | RL21_HUMAN   | 19  | 0 | 0 | 0  | 0 |
| 40S ribosomal protein S10 OS=Homo sapiens GN=RPS10 PE=1 SV=1                                           | RS10_HUMAN   | 19  | 0 | 0 | 0  | 0 |
| sp Q8N357 CB018_HUMAN Transmembrane protein C2orf18 OS=Homo sapiens GN=C2orf18                         | CB018_HUMAN  | 40  | 0 | 0 | 0  | 0 |
| DNA-binding protein A OS=Homo sapiens GN=CSDA PE=1 SV=4                                                | DBPA_HUMAN   | 40  | 0 | 0 | 1  | 0 |
| Anterior gradient protein 2 homolog OS=Homo sapiens GN=AGR2 PE=1 SV=1                                  | AGR2_HUMAN   | 20  | 0 | 0 | 5  | 0 |
| Apelin receptor OS=Homo sapiens GN=APLNR PE=1 SV=1                                                     | APJ_HUMAN    | 43  | 0 | 1 | 1  | 1 |
| Ras-related protein R-Ras2 OS=Homo sapiens GN=RRAS2 PE=1 SV=1                                          | RRAS2_HUMAN  | 23  | 0 | 0 | 0  | 0 |
| 60S ribosomal protein L10-like OS=Homo sapiens GN=RPL10L PE=1 SV=3                                     | RL10L_HUMAN  | 25  | 0 | 0 | 0  | 0 |
| Dolichyl-diphosphooligosaccharide--protein glycosyltransferase 48 kDa subunit OS=Homo sapiens GN=UGT48 | OST48_HUMAN  | 51  | 0 | 0 | 0  | 0 |
| 5'-3' exoribonuclease 2 OS=Homo sapiens GN=XRN2 PE=1 SV=1                                              | XRN2_HUMAN   | 109 | 0 | 0 | 1  | 0 |
| Alpha-centractin OS=Homo sapiens GN=ACTR1A PE=1 SV=1                                                   | ACTZ_HUMAN   | 43  | 0 | 0 | 1  | 0 |
| AP-2 complex subunit mu OS=Homo sapiens GN=AP2M1 PE=1 SV=2                                             | AP2M1_HUMAN  | 50  | 0 | 0 | 0  | 0 |
| Proto-oncogene tyrosine-protein kinase Src OS=Homo sapiens GN=SRC PE=1 SV=3                            | SRC_HUMAN    | 60  | 0 | 0 | 0  | 0 |
| Nuclear protein localization protein 4 homolog OS=Homo sapiens GN=NPLOC4 PE=1 SV=3                     | NPL4_HUMAN   | 68  | 0 | 0 | 0  | 0 |
| Pumilio domain-containing protein KIAA0020 OS=Homo sapiens GN=KIAA0020 PE=1 SV=3                       | K0020_HUMAN  | 74  | 0 | 0 | 0  | 0 |
| Nuclear pore complex protein Nup85 OS=Homo sapiens GN=NUP85 PE=1 SV=1                                  | NUP85_HUMAN  | 75  | 0 | 1 | 0  | 1 |

|                                                                                            |              |     |    |    |    |    |
|--------------------------------------------------------------------------------------------|--------------|-----|----|----|----|----|
| Crooked neck-like protein 1 OS=Homo sapiens GN=CRNKL1 PE=1 SV=4                            | CRNL1_HUMAN  | 100 | 0  | 0  | 0  | 0  |
| Importin-9 OS=Homo sapiens GN=IPO9 PE=1 SV=3                                               | IPO9_HUMAN   | 116 | 0  | 0  | 0  | 0  |
| Dystonin OS=Homo sapiens GN=DST PE=1 SV=4                                                  | DYST_HUMAN   | 861 | 0  | 0  | 0  | 0  |
| LIM domain only protein 7 OS=Homo sapiens GN=LMO7 PE=1 SV=3                                | LMO7_HUMAN   | 193 | 23 | 20 | 33 | 32 |
| 78 kDa glucose-regulated protein OS=Homo sapiens GN=HSPA5 PE=1 SV=2                        | GRP78_HUMAN  | 72  | 22 | 16 | 35 | 20 |
| Tropomyosin alpha-3 chain OS=Homo sapiens GN=TPM3 PE=1 SV=1                                | TPM3_HUMAN   | 33  | 4  | 2  | 5  | 3  |
| 4F2 cell-surface antigen heavy chain OS=Homo sapiens GN=SLC3A2 PE=1 SV=3                   | 4F2_HUMAN    | 68  | 1  | 2  | 4  | 1  |
| Calnexin OS=Homo sapiens GN=CANX PE=1 SV=2                                                 | CALX_HUMAN   | 68  | 1  | 2  | 3  | 1  |
| Sperm-specific antigen 2 OS=Homo sapiens GN=SSFA2 PE=1 SV=3                                | SSFA2_HUMAN  | 138 | 1  | 1  | 0  | 6  |
| Periplakin OS=Homo sapiens GN=PPL PE=1 SV=4                                                | PEPL_HUMAN   | 205 | 10 | 25 | 14 | 36 |
| Unconventional myosin-Vb OS=Homo sapiens GN=MYO5B PE=1 SV=3                                | MYO5B_HUMAN  | 214 | 9  | 8  | 3  | 16 |
| Coatomer subunit beta OS=Homo sapiens GN=COPB1 PE=1 SV=3                                   | COPB_HUMAN   | 107 | 5  | 3  | 8  | 2  |
| Integrin beta-4 OS=Homo sapiens GN=ITGB4 PE=1 SV=5                                         | ITB4_HUMAN   | 202 | 5  | 5  | 1  | 13 |
| Adseverin OS=Homo sapiens GN=SCIN PE=1 SV=4                                                | ADSV_HUMAN   | 80  | 4  | 1  | 2  | 7  |
| Interleukin enhancer-binding factor 3 OS=Homo sapiens GN=ILF3 PE=1 SV=3                    | ILF3_HUMAN   | 95  | 3  | 11 | 5  | 13 |
| Keratin, type II cytoskeletal 6A OS=Homo sapiens GN=KRT6A PE=1 SV=3                        | K2C6A_HUMAN  | 60  | 3  | 3  | 2  | 6  |
| Pleckstrin homology domain-containing family G member 3 OS=Homo sapiens GN=PLEKHG3 I       | PKHG3_HUMAN  | 134 | 3  | 3  | 1  | 5  |
| Inositol 1,4,5-trisphosphate receptor type 3 OS=Homo sapiens GN=ITPR3 PE=1 SV=2            | ITPR3_HUMAN  | 304 | 2  | 7  | 0  | 11 |
| Actin-binding LIM protein 1 OS=Homo sapiens GN=ABLIM1 PE=1 SV=3                            | ABLM1_HUMAN  | 88  | 2  | 1  | 0  | 3  |
| Mammalian ependymin-related protein 1 OS=Homo sapiens GN=EPDR1 PE=1 SV=2                   | EPDR1_HUMAN  | 25  | 2  | 0  | 0  | 2  |
| Splicing factor 3B subunit 1 OS=Homo sapiens GN=SF3B1 PE=1 SV=3                            | SF3B1_HUMAN  | 146 | 1  | 2  | 0  | 9  |
| Nesprin-2 OS=Homo sapiens GN=SYNE2 PE=1 SV=3                                               | SYNE2_HUMAN  | 796 | 1  | 13 | 0  | 19 |
| Protein transport protein Sec16A OS=Homo sapiens GN=SEC16A PE=1 SV=3                       | SC16A_HUMAN  | 234 | 1  | 0  | 0  | 1  |
| Rab11 family-interacting protein 1 OS=Homo sapiens GN=RAB11FIP1 PE=1 SV=2                  | RFIP1_HUMAN  | 137 | 1  | 0  | 0  | 1  |
| Laminin subunit beta-3 OS=Homo sapiens GN=LAMB3 PE=1 SV=1                                  | LAMB3_HUMAN  | 130 | 1  | 0  | 0  | 4  |
| Protein FAM83H OS=Homo sapiens GN=FAM83H PE=1 SV=3                                         | FA83H_HUMAN  | 127 | 1  | 2  | 0  | 4  |
| Aldehyde dehydrogenase, mitochondrial OS=Homo sapiens GN=ALDH2 PE=1 SV=2                   | ALDH2_HUMAN  | 56  | 1  | 0  | 0  | 1  |
| Villin-like protein OS=Homo sapiens GN=VILL PE=2 SV=3                                      | VILL_HUMAN   | 96  | 1  | 7  | 3  | 6  |
| Zinc finger protein 185 OS=Homo sapiens GN=ZNF185 PE=1 SV=3                                | ZN185_HUMAN  | 74  | 1  | 3  | 3  | 2  |
| Basigin OS=Homo sapiens GN=BSG PE=1 SV=2                                                   | BASI_HUMAN   | 42  | 0  | 1  | 1  | 0  |
| Ras-related protein Rab-7a OS=Homo sapiens GN=RAB7A PE=1 SV=1                              | RAB7A_HUMAN  | 23  | 0  | 1  | 2  | 0  |
| Elongation factor 1-delta OS=Homo sapiens GN=EEF1D PE=1 SV=5                               | EF1D_HUMAN   | 31  | 0  | 1  | 2  | 0  |
| Epithelial cell adhesion molecule OS=Homo sapiens GN=EPCAM PE=1 SV=2                       | EPCAM_HUMAN  | 35  | 0  | 2  | 3  | 1  |
| T-complex protein 1 subunit beta OS=Homo sapiens GN=CCT2 PE=1 SV=4                         | TCPB_HUMAN   | 57  | 3  | 0  | 4  | 0  |
| Leucine-rich PPR motif-containing protein, mitochondrial OS=Homo sapiens GN=LRPPRC PE=1    | LRPPRC_HUMAN | 158 | 3  | 5  | 3  | 9  |
| Aldehyde dehydrogenase, dimeric NADP-preferring OS=Homo sapiens GN=ALDH3A1 PE=1 SV         | AL3A1_HUMAN  | 50  | 3  | 0  | 10 | 0  |
| Putative endoplasmic-like protein OS=Homo sapiens GN=HSP90B2P PE=5 SV=1                    | ENPLL_HUMAN  | 46  | 2  | 0  | 3  | 0  |
| Kinectin OS=Homo sapiens GN=KTN1 PE=1 SV=1                                                 | KTN1_HUMAN   | 156 | 2  | 8  | 3  | 8  |
| Aldo-keto reductase family 1 member C2 OS=Homo sapiens GN=AKR1C2 PE=1 SV=3                 | AK1C2_HUMAN  | 37  | 1  | 0  | 2  | 0  |
| Solute carrier family 2, facilitated glucose transporter member 1 OS=Homo sapiens GN=SLC2A | GTR1_HUMAN   | 54  | 1  | 2  | 2  | 2  |
| CAD protein OS=Homo sapiens GN=CAD PE=1 SV=3                                               | PYR1_HUMAN   | 243 | 1  | 0  | 1  | 1  |
| Tropomyosin alpha-4 chain OS=Homo sapiens GN=TPM4 PE=1 SV=3                                | TPM4_HUMAN   | 29  | 0  | 0  | 1  | 0  |
| Retinal dehydrogenase 1 OS=Homo sapiens GN=ALDH1A1 PE=1 SV=2                               | AL1A1_HUMAN  | 55  | 0  | 0  | 1  | 0  |
| 60S ribosomal protein L8 OS=Homo sapiens GN=RPL8 PE=1 SV=2                                 | RL8_HUMAN    | 28  | 0  | 0  | 0  | 0  |
| Neutral amino acid transporter B(0) OS=Homo sapiens GN=SLC1A5 PE=1 SV=2                    | AAAT_HUMAN   | 57  | 0  | 0  | 0  | 0  |
| Sodium/potassium-transporting ATPase subunit alpha-1 OS=Homo sapiens GN=ATP1A1 PE=1        | AT1A1_HUMAN  | 113 | 0  | 6  | 2  | 6  |
| Unconventional myosin-X OS=Homo sapiens GN=MYO10 PE=1 SV=3                                 | MYO10_HUMAN  | 237 | 0  | 0  | 0  | 0  |
| Eukaryotic translation initiation factor 3 subunit H OS=Homo sapiens GN=EIF3H PE=1 SV=1    | EIF3H_HUMAN  | 40  | 0  | 0  | 1  | 0  |
| Ras-related protein Rab-5A OS=Homo sapiens GN=RAB5A PE=1 SV=2                              | RAB5A_HUMAN  | 24  | 0  | 0  | 0  | 0  |
| T-complex protein 1 subunit epsilon OS=Homo sapiens GN=CCT5 PE=1 SV=1                      | TCPE_HUMAN   | 60  | 0  | 0  | 2  | 0  |
| Malectin OS=Homo sapiens GN=MLEC PE=1 SV=1                                                 | MLEC_HUMAN   | 32  | 0  | 0  | 0  | 0  |
| Annexin A5 OS=Homo sapiens GN=ANXA5 PE=1 SV=2                                              | ANXA5_HUMAN  | 36  | 0  | 0  | 0  | 0  |
| Annexin A4 OS=Homo sapiens GN=ANXA4 PE=1 SV=4                                              | ANXA4_HUMAN  | 36  | 0  | 0  | 0  | 0  |
| Poly(rC)-binding protein 1 OS=Homo sapiens GN=PCBP1 PE=1 SV=2                              | PCBP1_HUMAN  | 37  | 0  | 0  | 0  | 0  |
| Mitotic checkpoint protein BUB3 OS=Homo sapiens GN=BUB3 PE=1 SV=1                          | BUB3_HUMAN   | 37  | 0  | 0  | 2  | 0  |
| Ras GTPase-activating protein-binding protein 1 OS=Homo sapiens GN=G3BP1 PE=1 SV=1         | G3BP1_HUMAN  | 52  | 0  | 0  | 2  | 0  |
| Heat shock protein 105 kDa OS=Homo sapiens GN=HSPH1 PE=1 SV=1                              | HS105_HUMAN  | 97  | 0  | 0  | 0  | 0  |
| N-acetyltransferase 10 OS=Homo sapiens GN=NAT10 PE=1 SV=2                                  | NAT10_HUMAN  | 116 | 0  | 0  | 0  | 0  |
| Heat shock protein HSP 90-beta OS=Homo sapiens GN=HSP90AB1 PE=1 SV=4                       | HS90B_HUMAN  | 83  | 3  | 1  | 6  | 1  |
| Putative heat shock protein HSP 90-beta-3 OS=Homo sapiens GN=HSP90AB3P PE=5 SV=1           | H90B3_HUMAN  | 68  | 3  | 1  | 3  | 2  |
| Peroxiredoxin-4 OS=Homo sapiens GN=PRDX4 PE=1 SV=1                                         | PRDX4_HUMAN  | 31  | 2  | 0  | 4  | 0  |
| Eukaryotic initiation factor 4A-I OS=Homo sapiens GN=EIF4A1 PE=1 SV=1                      | IF4A1_HUMAN  | 46  | 2  | 1  | 8  | 1  |
| 26S protease regulatory subunit 6B OS=Homo sapiens GN=PSMC4 PE=1 SV=2                      | PRS6B_HUMAN  | 47  | 2  | 0  | 2  | 1  |
| UDP-glucose:glycoprotein glucosyltransferase 1 OS=Homo sapiens GN=UGGT1 PE=1 SV=3          | UGGG1_HUMAN  | 177 | 2  | 0  | 3  | 0  |
| Phosphoenolpyruvate carboxykinase [GTP], mitochondrial OS=Homo sapiens GN=PCK2 PE=1        | PCKGM_HUMAN  | 71  | 2  | 0  | 4  | 0  |
| Transcription intermediary factor 1-beta OS=Homo sapiens GN=TRIM28 PE=1 SV=5               | TIF1B_HUMAN  | 89  | 2  | 1  | 6  | 1  |
| L-lactate dehydrogenase A chain OS=Homo sapiens GN=LDHA PE=1 SV=2                          | LDHA_HUMAN   | 37  | 1  | 0  | 2  | 0  |
| Elongation factor 1-gamma OS=Homo sapiens GN=EEF1G PE=1 SV=3                               | EF1G_HUMAN   | 50  | 1  | 2  | 7  | 2  |
| Splicing factor, proline- and glutamine-rich OS=Homo sapiens GN=SFPQ PE=1 SV=2             | SFPQ_HUMAN   | 76  | 1  | 2  | 7  | 2  |
| Aldo-keto reductase family 1 member C3 OS=Homo sapiens GN=AKR1C3 PE=1 SV=4                 | AK1C3_HUMAN  | 37  | 1  | 1  | 3  | 1  |
| Fructose-bisphosphate aldolase A OS=Homo sapiens GN=ALDOA PE=1 SV=2                        | ALDOA_HUMAN  | 39  | 1  | 0  | 5  | 0  |
| Glutathione S-transferase P OS=Homo sapiens GN=GSTP1 PE=1 SV=2                             | GSTP1_HUMAN  | 23  | 1  | 0  | 6  | 0  |
| Junction plakoglobin OS=Homo sapiens GN=JUP PE=1 SV=3                                      | PLAK_HUMAN   | 82  | 1  | 3  | 7  | 3  |
| Ribosome-binding protein 1 OS=Homo sapiens GN=RRBP1 PE=1 SV=4                              | RRBP1_HUMAN  | 152 | 1  | 1  | 1  | 2  |
| Putative pre-mRNA-splicing factor ATP-dependent RNA helicase DHX15 OS=Homo sapiens GN      | DXH15_HUMAN  | 91  | 1  | 1  | 1  | 2  |
| Dihydropyridyl dehydrogenase, mitochondrial OS=Homo sapiens GN=DLD PE=1 SV=2               | DLDH_HUMAN   | 54  | 1  | 1  | 1  | 2  |
| Collagen alpha-1(VII) chain OS=Homo sapiens GN=COL7A1 PE=1 SV=2                            | CO7A1_HUMAN  | 295 | 1  | 5  | 1  | 8  |
| Tumor suppressor p53-binding protein 1 OS=Homo sapiens GN=TP53BP1 PE=1 SV=2                | TP53B_HUMAN  | 214 | 1  | 4  | 1  | 7  |
| Dihydropyridyllysine-residue acetyltransferase component of pyruvate dehydrogenase comple  | ODP2_HUMAN   | 69  | 1  | 4  | 1  | 6  |
| Sequestosome-1 OS=Homo sapiens GN=SQSTM1 PE=1 SV=1                                         | SQSTM_HUMAN  | 48  | 1  | 2  | 1  | 3  |
| Endoplasmic reticulum resident protein 29 OS=Homo sapiens GN=ERP29 PE=1 SV=4               | ERP29_HUMAN  | 29  | 1  | 0  | 2  | 0  |

|                                                                                          |             |     |   |   |   |   |
|------------------------------------------------------------------------------------------|-------------|-----|---|---|---|---|
| ADP-ribosylation factor 1 OS=Homo sapiens GN=ARF1 PE=1 SV=2                              | ARF1_HUMAN  | 21  | 1 | 0 | 2 | 0 |
| 26S proteasome non-ATPase regulatory subunit 3 OS=Homo sapiens GN=PSMD3 PE=1 SV=2        | PSMD3_HUMAN | 61  | 1 | 0 | 2 | 0 |
| Aconitase hydratase, mitochondrial OS=Homo sapiens GN=ACO2 PE=1 SV=2                     | ACON_HUMAN  | 85  | 1 | 0 | 3 | 0 |
| Ran GTPase-activating protein 1 OS=Homo sapiens GN=RANGAP1 PE=1 SV=1                     | RAGP1_HUMAN | 64  | 1 | 0 | 3 | 0 |
| Creatine kinase U-type, mitochondrial OS=Homo sapiens GN=CKMT1A PE=1 SV=1                | KCRU_HUMAN  | 47  | 1 | 0 | 4 | 0 |
| Tubulin beta chain OS=Homo sapiens GN=TUBB PE=1 SV=2                                     | TBB5_HUMAN  | 50  | 0 | 1 | 3 | 1 |
| 60S ribosomal protein L7a OS=Homo sapiens GN=RPL7A PE=1 SV=2                             | RL7A_HUMAN  | 30  | 0 | 0 | 0 | 0 |
| 40S ribosomal protein S7 OS=Homo sapiens GN=RPS7 PE=1 SV=1                               | RS7_HUMAN   | 22  | 0 | 0 | 1 | 0 |
| Heat shock protein beta-1 OS=Homo sapiens GN=HSPB1 PE=1 SV=2                             | HSPB1_HUMAN | 23  | 0 | 0 | 1 | 0 |
| 60S ribosomal protein L4 OS=Homo sapiens GN=RPL4 PE=1 SV=5                               | RL4_HUMAN   | 48  | 0 | 0 | 0 | 0 |
| 40S ribosomal protein S25 OS=Homo sapiens GN=RPS25 PE=1 SV=1                             | RS25_HUMAN  | 14  | 0 | 0 | 0 | 0 |
| Heterogeneous nuclear ribonucleoprotein A0 OS=Homo sapiens GN=HNRNPA0 PE=1 SV=1          | ROA0_HUMAN  | 31  | 0 | 1 | 0 | 1 |
| Estradiol 17-beta-dehydrogenase 11 OS=Homo sapiens GN=HSD17B11 PE=1 SV=3                 | DHB11_HUMAN | 33  | 0 | 0 | 0 | 0 |
| 60S ribosomal protein L6 OS=Homo sapiens GN=RPL6 PE=1 SV=3                               | RL6_HUMAN   | 33  | 0 | 1 | 0 | 1 |
| Heterogeneous nuclear ribonucleoprotein A/B OS=Homo sapiens GN=HNRNPAB PE=1 SV=2         | ROAA_HUMAN  | 36  | 0 | 1 | 1 | 1 |
| Septin-2 OS=Homo sapiens GN=SEPT2 PE=1 SV=1                                              | SEPT2_HUMAN | 41  | 0 | 0 | 0 | 0 |
| 60S ribosomal protein L17 OS=Homo sapiens GN=RPL17 PE=1 SV=3                             | RL17_HUMAN  | 21  | 0 | 0 | 0 | 0 |
| 60S ribosomal protein L18a OS=Homo sapiens GN=RPL18A PE=1 SV=2                           | RL18A_HUMAN | 21  | 0 | 0 | 0 | 0 |
| Septin-9 OS=Homo sapiens GN=SEPT9 PE=1 SV=2                                              | SEPT9_HUMAN | 65  | 0 | 0 | 2 | 0 |
| PRA1 family protein 3 OS=Homo sapiens GN=ARL6IP5 PE=1 SV=1                               | PRAF3_HUMAN | 22  | 0 | 0 | 1 | 0 |
| Nucleosome assembly protein 1-like 1 OS=Homo sapiens GN=NAP1L1 PE=1 SV=1                 | NP1L1_HUMAN | 45  | 0 | 0 | 0 | 0 |
| Nascent polypeptide-associated complex subunit alpha OS=Homo sapiens GN=NACA PE=1 SV     | NACA_HUMAN  | 23  | 0 | 0 | 2 | 0 |
| Dolichyl-diphosphooligosaccharide--protein glycosyltransferase subunit 2 OS=Homo sapiens | RPN2_HUMAN  | 69  | 0 | 0 | 2 | 0 |
| Ras-related protein Rab-2A OS=Homo sapiens GN=RAB2A PE=1 SV=1                            | RAB2A_HUMAN | 24  | 0 | 0 | 0 | 0 |
| Tubulin beta-6 chain OS=Homo sapiens GN=TUBB6 PE=1 SV=1                                  | TBB6_HUMAN  | 50  | 0 | 0 | 0 | 0 |
| Protein-glutamine gamma-glutamyltransferase 2 OS=Homo sapiens GN=TGM2 PE=1 SV=2          | TGM2_HUMAN  | 77  | 0 | 0 | 0 | 0 |
| T-complex protein 1 subunit delta OS=Homo sapiens GN=CCT4 PE=1 SV=4                      | TCPD_HUMAN  | 58  | 0 | 0 | 3 | 0 |
| Heat shock 70 kDa protein 4 OS=Homo sapiens GN=HSPA4 PE=1 SV=4                           | HSP74_HUMAN | 94  | 0 | 0 | 1 | 0 |
| Eukaryotic translation initiation factor 2 subunit 1 OS=Homo sapiens GN=EIF2S1 PE=1 SV=3 | IF2A_HUMAN  | 36  | 0 | 0 | 1 | 0 |
| PDZ and LIM domain protein 1 OS=Homo sapiens GN=PDLIM1 PE=1 SV=4                         | PDL1_HUMAN  | 36  | 0 | 0 | 1 | 0 |
| CD44 antigen OS=Homo sapiens GN=CD44 PE=1 SV=3                                           | CD44_HUMAN  | 82  | 0 | 0 | 0 | 0 |
| Guanine nucleotide-binding protein subunit alpha-13 OS=Homo sapiens GN=GNA13 PE=1 SV     | GNA13_HUMAN | 44  | 0 | 0 | 0 | 0 |
| Proliferation-associated protein 2G4 OS=Homo sapiens GN=PA2G4 PE=1 SV=3                  | PA2G4_HUMAN | 44  | 0 | 0 | 0 | 0 |
| Casein kinase II subunit alpha OS=Homo sapiens GN=CSNK2A1 PE=1 SV=1                      | CSK21_HUMAN | 45  | 0 | 0 | 0 | 0 |
| Tubulin beta-2B chain OS=Homo sapiens GN=TUBB2B PE=1 SV=1                                | TBB2B_HUMAN | 50  | 0 | 0 | 1 | 0 |
| Acyl-coenzyme A thioesterase 9, mitochondrial OS=Homo sapiens GN=ACOT9 PE=1 SV=2         | ACOT9_HUMAN | 50  | 0 | 0 | 0 | 0 |
| Staphylococcal nuclease domain-containing protein 1 OS=Homo sapiens GN=SND1 PE=1 SV=1    | SND1_HUMAN  | 102 | 0 | 0 | 3 | 0 |
| Eukaryotic translation initiation factor 3 subunit C OS=Homo sapiens GN=EIF3C PE=1 SV=1  | EIF3C_HUMAN | 105 | 0 | 0 | 5 | 0 |
| General transcription factor II-I OS=Homo sapiens GN=GTF2I PE=1 SV=2                     | GTF2I_HUMAN | 112 | 0 | 0 | 3 | 0 |
| Keratin, type II cytoskeletal 79 OS=Homo sapiens GN=KRT79 PE=1 SV=2                      | K2C79_HUMAN | 58  | 0 | 1 | 1 | 1 |
| Importin subunit alpha-2 OS=Homo sapiens GN=KPNA2 PE=1 SV=1                              | IMA2_HUMAN  | 58  | 0 | 0 | 0 | 0 |
| Epidermal growth factor receptor OS=Homo sapiens GN=EGFR PE=1 SV=2                       | EGFR_HUMAN  | 134 | 0 | 0 | 0 | 0 |
| Actin filament-associated protein 1 OS=Homo sapiens GN=AFAP1 PE=1 SV=2                   | AFAP1_HUMAN | 81  | 0 | 0 | 0 | 0 |
| Eukaryotic translation initiation factor 3 subunit A OS=Homo sapiens GN=EIF3A PE=1 SV=1  | EIF3A_HUMAN | 167 | 0 | 0 | 4 | 0 |
| Polyribonucleotide nucleotidyltransferase 1, mitochondrial OS=Homo sapiens GN=PNPT1 PE=  | PNPT1_HUMAN | 86  | 0 | 0 | 0 | 0 |
| Ankycorbin OS=Homo sapiens GN=RAI14 PE=1 SV=2                                            | RAI14_HUMAN | 110 | 0 | 0 | 0 | 0 |
| Potassium-transporting ATPase alpha chain 2 OS=Homo sapiens GN=ATP12A PE=1 SV=3          | AT12A_HUMAN | 116 | 0 | 0 | 0 | 0 |
| Plasma membrane calcium-transporting ATPase 1 OS=Homo sapiens GN=ATP2B1 PE=1 SV=3        | AT2B1_HUMAN | 139 | 0 | 0 | 0 | 0 |
| RRP12-like protein OS=Homo sapiens GN=RRP12 PE=1 SV=2                                    | RRP12_HUMAN | 144 | 0 | 0 | 0 | 0 |
| Absent in melanoma 1 protein OS=Homo sapiens GN=AIM1 PE=1 SV=3                           | AIM1_HUMAN  | 189 | 0 | 1 | 0 | 1 |
| Integrin alpha-6 OS=Homo sapiens GN=ITGA6 PE=1 SV=4                                      | ITA6_HUMAN  | 127 | 0 | 1 | 0 | 1 |
| 2-oxoglutarate dehydrogenase, mitochondrial OS=Homo sapiens GN=OGDH PE=1 SV=3            | ODO1_HUMAN  | 116 | 0 | 1 | 0 | 1 |
| Nuclear cap-binding protein subunit 1 OS=Homo sapiens GN=NCBP1 PE=1 SV=1                 | NCBP1_HUMAN | 92  | 0 | 1 | 0 | 1 |
| Neurabin-2 OS=Homo sapiens GN=PPP1R9B PE=1 SV=2                                          | NEB2_HUMAN  | 89  | 0 | 1 | 0 | 1 |
| Mitochondrial inner membrane protein OS=Homo sapiens GN=IMMT PE=1 SV=1                   | IMMT_HUMAN  | 84  | 0 | 1 | 0 | 1 |
| Scellin OS=Homo sapiens GN=SCEL PE=1 SV=2                                                | SCEL_HUMAN  | 78  | 0 | 1 | 0 | 1 |
| ATPase family AAA domain-containing protein 3A OS=Homo sapiens GN=ATAD3A PE=1 SV=2       | ATD3A_HUMAN | 71  | 0 | 1 | 0 | 1 |
| Lamin-B1 OS=Homo sapiens GN=LMNB1 PE=1 SV=2                                              | LMNB1_HUMAN | 66  | 0 | 1 | 0 | 1 |
| U4/U6 small nuclear ribonucleoprotein Prp4 OS=Homo sapiens GN=PRPF4 PE=1 SV=2            | PRP4_HUMAN  | 58  | 0 | 1 | 0 | 1 |
| Trifunctional enzyme subunit beta, mitochondrial OS=Homo sapiens GN=HADHB PE=1 SV=3      | ECHB_HUMAN  | 51  | 0 | 2 | 0 | 2 |
| Actin-like protein 6A OS=Homo sapiens GN=ACTL6A PE=1 SV=1                                | ACL6A_HUMAN | 47  | 0 | 1 | 0 | 1 |
| TAR DNA-binding protein 43 OS=Homo sapiens GN=TARDBP PE=1 SV=1                           | TADBP_HUMAN | 45  | 0 | 1 | 0 | 1 |
| Erlin-2 OS=Homo sapiens GN=ERLIN2 PE=1 SV=1                                              | ERLN2_HUMAN | 38  | 0 | 1 | 0 | 1 |
| Protein NipSnap homolog 1 OS=Homo sapiens GN=NIPSNAP1 PE=1 SV=1                          | NIPS1_HUMAN | 33  | 0 | 2 | 0 | 2 |
| Polyadenylate-binding protein 2 OS=Homo sapiens GN=PABPN1 PE=1 SV=3                      | PABP2_HUMAN | 33  | 0 | 1 | 0 | 1 |
| Serine/arginine-rich splicing factor 7 OS=Homo sapiens GN=SRSF7 PE=1 SV=1                | SRSF7_HUMAN | 27  | 0 | 1 | 0 | 1 |
| 60S ribosomal protein L24 OS=Homo sapiens GN=RPL24 PE=1 SV=1                             | RL24_HUMAN  | 18  | 0 | 1 | 0 | 1 |
| Histone H2A type 1-A OS=Homo sapiens GN=HIST1H2AA PE=1 SV=3                              | H2A1A_HUMAN | 14  | 0 | 1 | 0 | 1 |
| Ig kappa chain C region OS=Homo sapiens GN=IGKC PE=1 SV=1                                | IGKC_HUMAN  | 12  | 0 | 1 | 0 | 1 |
| DNA topoisomerase 2-beta OS=Homo sapiens GN=TOP2B PE=1 SV=3                              | TOP2B_HUMAN | 183 | 0 | 0 | 0 | 0 |
| Gem-associated protein 5 OS=Homo sapiens GN=GEMIN5 PE=1 SV=3                             | GEM15_HUMAN | 169 | 0 | 0 | 0 | 0 |
| DNA repair protein RAD50 OS=Homo sapiens GN=RAD50 PE=1 SV=1                              | RAD50_HUMAN | 154 | 0 | 0 | 0 | 0 |
| Sister chromatid cohesion protein PDS5 homolog A OS=Homo sapiens GN=PDS5A PE=1 SV=1      | PDS5A_HUMAN | 151 | 0 | 0 | 0 | 0 |
| Inverted formin-2 OS=Homo sapiens GN=INF2 PE=1 SV=2                                      | INF2_HUMAN  | 136 | 0 | 1 | 0 | 1 |
| MORC family CW-type zinc finger protein 2 OS=Homo sapiens GN=MORC2 PE=1 SV=2             | MORC2_HUMAN | 118 | 0 | 0 | 0 | 0 |
| La-related protein 1B OS=Homo sapiens GN=LARP1B PE=1 SV=2                                | LAR1B_HUMAN | 105 | 0 | 0 | 0 | 0 |
| Integrin beta-5 OS=Homo sapiens GN=ITGB5 PE=1 SV=1                                       | ITB5_HUMAN  | 88  | 0 | 0 | 0 | 0 |
| Nicastrin OS=Homo sapiens GN=NCSTN PE=1 SV=2                                             | NICA_HUMAN  | 78  | 0 | 0 | 0 | 0 |
| Immunoglobulin-like domain-containing receptor 2 OS=Homo sapiens GN=ILDR2 PE=2 SV=1      | ILDR2_HUMAN | 71  | 0 | 0 | 0 | 0 |
| Polyadenylate-binding protein 4 OS=Homo sapiens GN=PABPC4 PE=1 SV=1                      | PABP4_HUMAN | 71  | 0 | 0 | 0 | 0 |
| Protein unc-93 homolog B1 OS=Homo sapiens GN=UNC93B1 PE=1 SV=2                           | UN93B_HUMAN | 67  | 0 | 0 | 0 | 0 |

|                                                                                          |             |     |   |   |   |   |
|------------------------------------------------------------------------------------------|-------------|-----|---|---|---|---|
| General transcription factor IIH subunit 1 OS=Homo sapiens GN=GTF2H1 PE=1 SV=1           | TF2H1_HUMAN | 62  | 0 | 0 | 0 | 0 |
| RNA-binding protein 39 OS=Homo sapiens GN=RBM39 PE=1 SV=2                                | RBM39_HUMAN | 59  | 0 | 0 | 0 | 0 |
| Sodium-coupled neutral amino acid transporter 2 OS=Homo sapiens GN=SLC38A2 PE=1 SV=2     | S38A2_HUMAN | 56  | 0 | 0 | 0 | 0 |
| Coronin-2B OS=Homo sapiens GN=CORO2B PE=2 SV=4                                           | COR2B_HUMAN | 55  | 0 | 0 | 0 | 0 |
| Ribosomal L1 domain-containing protein 1 OS=Homo sapiens GN=RSL1D1 PE=1 SV=3             | RL1D1_HUMAN | 55  | 0 | 0 | 0 | 0 |
| Cytoplasmic dynein 1 light intermediate chain 2 OS=Homo sapiens GN=DYNC1L12 PE=1 SV=1    | DC1L2_HUMAN | 54  | 0 | 0 | 0 | 0 |
| Serine hydroxymethyltransferase, cytosolic OS=Homo sapiens GN=SHMT1 PE=1 SV=1            | GLYC_HUMAN  | 53  | 0 | 0 | 0 | 0 |
| Serine palmitoyltransferase 1 OS=Homo sapiens GN=SPTLC1 PE=1 SV=1                        | SPTC1_HUMAN | 53  | 0 | 0 | 0 | 0 |
| Eukaryotic translation initiation factor 3 subunit E OS=Homo sapiens GN=EIF3E PE=1 SV=1  | EIF3E_HUMAN | 52  | 0 | 0 | 0 | 0 |
| 2',3'-cyclic-nucleotide 3'-phosphodiesterase OS=Homo sapiens GN=CNP PE=1 SV=2            | CN37_HUMAN  | 48  | 0 | 0 | 0 | 0 |
| Eukaryotic initiation factor 4A-III OS=Homo sapiens GN=EIF4A3 PE=1 SV=4                  | IF4A3_HUMAN | 47  | 0 | 1 | 0 | 1 |
| Translocating chain-associated membrane protein 1 OS=Homo sapiens GN=TRAM1 PE=1 SV=1     | TRAM1_HUMAN | 43  | 0 | 0 | 0 | 0 |
| 5-hydroxytryptamine receptor 1F OS=Homo sapiens GN=HTR1F PE=2 SV=1                       | 5HT1F_HUMAN | 42  | 0 | 0 | 0 | 0 |
| Protein Wnt-2 OS=Homo sapiens GN=WNT2 PE=1 SV=1                                          | WNT2_HUMAN  | 40  | 0 | 0 | 0 | 0 |
| Transcriptional activator protein Pur-alpha OS=Homo sapiens GN=PURA PE=1 SV=2            | PURA_HUMAN  | 35  | 0 | 0 | 0 | 0 |
| Aminoacyl tRNA synthase complex-interacting multifunctional protein 1 OS=Homo sapiens G  | AIMP1_HUMAN | 34  | 0 | 0 | 0 | 0 |
| 40S ribosomal protein S6 OS=Homo sapiens GN=RPS6 PE=1 SV=1                               | RS6_HUMAN   | 29  | 0 | 0 | 0 | 0 |
| Splicing factor U2AF 35 kDa subunit OS=Homo sapiens GN=U2AF1 PE=1 SV=3                   | U2AF1_HUMAN | 28  | 0 | 0 | 0 | 0 |
| Proteasome subunit beta type-1 OS=Homo sapiens GN=PSMB1 PE=1 SV=2                        | PSB1_HUMAN  | 26  | 0 | 0 | 0 | 0 |
| 60S ribosomal protein L15 OS=Homo sapiens GN=RPL15 PE=1 SV=2                             | RL15_HUMAN  | 24  | 0 | 0 | 0 | 0 |
| Transgelin-2 OS=Homo sapiens GN=TAGLN2 PE=1 SV=3                                         | TAGL2_HUMAN | 22  | 0 | 0 | 0 | 0 |
| Ras-related protein Rap-2b OS=Homo sapiens GN=RAP2B PE=1 SV=1                            | RAP2B_HUMAN | 21  | 0 | 0 | 0 | 0 |
| 60S ribosomal protein L23a OS=Homo sapiens GN=RPL23A PE=1 SV=1                           | RL23A_HUMAN | 18  | 0 | 0 | 0 | 0 |
| 40S ribosomal protein S23 OS=Homo sapiens GN=RPS23 PE=1 SV=3                             | RS23_HUMAN  | 16  | 0 | 0 | 0 | 0 |
| 60S ribosomal protein L31 OS=Homo sapiens GN=RPL31 PE=1 SV=1                             | RL31_HUMAN  | 14  | 0 | 0 | 0 | 0 |
| Small nuclear ribonucleoprotein Sm D2 OS=Homo sapiens GN=SNRPD2 PE=1 SV=1                | SMD2_HUMAN  | 14  | 0 | 1 | 0 | 1 |
| Dynein light chain Tctex-type 1 OS=Homo sapiens GN=DYNLT1 PE=1 SV=1                      | DYLT1_HUMAN | 12  | 0 | 0 | 0 | 0 |
| 60S ribosomal protein L36 OS=Homo sapiens GN=RPL36 PE=1 SV=3                             | RL36_HUMAN  | 12  | 0 | 0 | 0 | 0 |
| Acetyl-CoA carboxylase 1 OS=Homo sapiens GN=ACACA PE=1 SV=2                              | ACACA_HUMAN | 266 | 0 | 0 | 0 | 0 |
| TRMT1-like protein OS=Homo sapiens GN=TRMT1L PE=1 SV=2                                   | TRM1L_HUMAN | 82  | 0 | 0 | 0 | 0 |
| Cytoplasmic dynein 1 intermediate chain 2 OS=Homo sapiens GN=DYNC1I2 PE=1 SV=3           | DC1I2_HUMAN | 71  | 0 | 0 | 0 | 0 |
| Utrophin OS=Homo sapiens GN=UTRN PE=1 SV=2                                               | UTRO_HUMAN  | 394 | 0 | 0 | 1 | 0 |
| Bromodomain and WD repeat-containing protein 1 OS=Homo sapiens GN=BRWD1 PE=1 SV=4        | BRWD1_HUMAN | 263 | 0 | 0 | 1 | 0 |
| Host cell factor 1 OS=Homo sapiens GN=HCFC1 PE=1 SV=2                                    | HCFC1_HUMAN | 209 | 0 | 0 | 1 | 0 |
| Tubulin-specific chaperone D OS=Homo sapiens GN=TBCD PE=1 SV=2                           | TBCD_HUMAN  | 133 | 0 | 0 | 1 | 0 |
| DNA polymerase delta catalytic subunit OS=Homo sapiens GN=POLD1 PE=1 SV=2                | DPOD1_HUMAN | 124 | 0 | 0 | 1 | 0 |
| Ataxin-2-like protein OS=Homo sapiens GN=ATXN2L PE=1 SV=2                                | ATX2L_HUMAN | 113 | 0 | 0 | 1 | 0 |
| Lon protease homolog, mitochondrial OS=Homo sapiens GN=LONP1 PE=1 SV=2                   | LONM_HUMAN  | 106 | 0 | 0 | 1 | 0 |
| Protein unc-45 homolog A OS=Homo sapiens GN=UNC45A PE=1 SV=1                             | UN45A_HUMAN | 103 | 0 | 0 | 1 | 0 |
| C-1-tetrahydrofolate synthase, cytoplasmic OS=Homo sapiens GN=MTHFD1 PE=1 SV=3           | C1TC_HUMAN  | 102 | 0 | 0 | 1 | 0 |
| DNA replication licensing factor MCM2 OS=Homo sapiens GN=MCM2 PE=1 SV=4                  | MCM2_HUMAN  | 102 | 0 | 0 | 1 | 0 |
| Band 4.1-like protein 1 OS=Homo sapiens GN=EPB41L1 PE=1 SV=2                             | E41L1_HUMAN | 99  | 0 | 0 | 1 | 0 |
| Vacuolar protein sorting-associated protein 35 OS=Homo sapiens GN=VPS35 PE=1 SV=2        | VPS35_HUMAN | 92  | 0 | 0 | 1 | 0 |
| Niban-like protein 1 OS=Homo sapiens GN=FAM129B PE=1 SV=3                                | NIBL1_HUMAN | 84  | 0 | 0 | 1 | 0 |
| Cleavage stimulation factor subunit 3 OS=Homo sapiens GN=CSTF3 PE=1 SV=1                 | CSTF3_HUMAN | 83  | 0 | 0 | 1 | 0 |
| Lanosterol synthase OS=Homo sapiens GN=LSS PE=1 SV=1                                     | ERG7_HUMAN  | 83  | 0 | 0 | 1 | 0 |
| Threonine--tRNA ligase, cytoplasmic OS=Homo sapiens GN=TARS PE=1 SV=3                    | SYTC_HUMAN  | 83  | 0 | 0 | 1 | 0 |
| ATP-dependent RNA helicase DDX1 OS=Homo sapiens GN=DDX1 PE=1 SV=2                        | DDX1_HUMAN  | 82  | 0 | 0 | 1 | 0 |
| DNA replication licensing factor MCM7 OS=Homo sapiens GN=MCM7 PE=1 SV=4                  | MCM7_HUMAN  | 81  | 0 | 0 | 1 | 0 |
| Glutamine--fructose-6-phosphate aminotransferase [isomerizing] 1 OS=Homo sapiens GN=GF   | GFPT1_HUMAN | 79  | 0 | 0 | 1 | 0 |
| GMP synthase [glutamine-hydrolyzing] OS=Homo sapiens GN=GMPS PE=1 SV=1                   | GUAA_HUMAN  | 77  | 0 | 0 | 1 | 0 |
| Stromal interaction molecule 1 OS=Homo sapiens GN=STIM1 PE=1 SV=3                        | STIM1_HUMAN | 77  | 0 | 0 | 1 | 0 |
| Transmembrane 9 superfamily member 4 OS=Homo sapiens GN=TM9SF4 PE=1 SV=2                 | TM9S4_HUMAN | 75  | 0 | 0 | 1 | 0 |
| Radixin OS=Homo sapiens GN=RDX PE=1 SV=1                                                 | RADI_HUMAN  | 69  | 0 | 0 | 1 | 0 |
| Clathrin interactor 1 OS=Homo sapiens GN=CLINT1 PE=1 SV=1                                | EPN4_HUMAN  | 68  | 0 | 0 | 1 | 0 |
| RNA-binding protein EWS OS=Homo sapiens GN=EWSR1 PE=1 SV=1                               | EWS_HUMAN   | 68  | 0 | 0 | 1 | 0 |
| Transmembrane 9 superfamily member 3 OS=Homo sapiens GN=TM9SF3 PE=1 SV=2                 | TM9S3_HUMAN | 68  | 0 | 0 | 1 | 0 |
| Serine/threonine-protein phosphatase 2A 65 kDa regulatory subunit A alpha isoform OS=Hor | 2AAA_HUMAN  | 65  | 0 | 0 | 1 | 0 |
| NAD-dependent malic enzyme, mitochondrial OS=Homo sapiens GN=ME2 PE=1 SV=1               | MAOM_HUMAN  | 65  | 0 | 0 | 1 | 0 |
| Bifunctional purine biosynthesis protein PURH OS=Homo sapiens GN=ATIC PE=1 SV=3          | PUR9_HUMAN  | 65  | 0 | 0 | 1 | 0 |
| Asparagine synthetase [glutamine-hydrolyzing] OS=Homo sapiens GN=ASNS PE=1 SV=4          | ASNS_HUMAN  | 64  | 0 | 0 | 1 | 0 |
| NADP-dependent malic enzyme OS=Homo sapiens GN=ME1 PE=1 SV=1                             | MAOX_HUMAN  | 64  | 0 | 0 | 1 | 0 |
| General transcription factor 3C polypeptide 5 OS=Homo sapiens GN=GTF3C5 PE=1 SV=2        | TF3C5_HUMAN | 60  | 0 | 0 | 1 | 0 |
| Splicing factor 3A subunit 3 OS=Homo sapiens GN=SF3A3 PE=1 SV=1                          | SF3A3_HUMAN | 59  | 0 | 0 | 1 | 0 |
| D-3-phosphoglycerate dehydrogenase OS=Homo sapiens GN=PHGDH PE=1 SV=4                    | SERA_HUMAN  | 57  | 0 | 0 | 1 | 0 |
| F-box-like/WD repeat-containing protein TBL1XR1 OS=Homo sapiens GN=TBL1XR1 PE=1 SV=1     | TBL1R_HUMAN | 56  | 0 | 0 | 1 | 0 |
| TOM1-like protein 2 OS=Homo sapiens GN=TOM1L2 PE=1 SV=1                                  | TM1L2_HUMAN | 56  | 0 | 0 | 1 | 0 |
| Monocarboxylate transporter 1 OS=Homo sapiens GN=SLC16A1 PE=1 SV=3                       | MOT1_HUMAN  | 54  | 0 | 0 | 1 | 0 |
| Mitochondrial-processing peptidase subunit beta OS=Homo sapiens GN=PMPCB PE=1 SV=2       | MPPB_HUMAN  | 54  | 0 | 0 | 1 | 0 |
| Dipeptidyl peptidase 1 OS=Homo sapiens GN=CTSC PE=1 SV=2                                 | CATC_HUMAN  | 52  | 0 | 0 | 1 | 0 |
| Glutathione synthetase OS=Homo sapiens GN=GSS PE=1 SV=1                                  | GSHB_HUMAN  | 52  | 0 | 0 | 1 | 0 |
| Coproporphyrinogen-III oxidase, mitochondrial OS=Homo sapiens GN=CPOX PE=1 SV=3          | HEM6_HUMAN  | 50  | 0 | 0 | 1 | 0 |
| Ribonuclease inhibitor OS=Homo sapiens GN=RNH1 PE=1 SV=2                                 | RINI_HUMAN  | 50  | 0 | 0 | 1 | 0 |
| Histone-binding protein RBBP7 OS=Homo sapiens GN=RBBP7 PE=1 SV=1                         | RBBP7_HUMAN | 48  | 0 | 0 | 1 | 0 |
| Multifunctional protein ADE2 OS=Homo sapiens GN=PAICS PE=1 SV=3                          | PUR6_HUMAN  | 47  | 0 | 0 | 1 | 0 |
| Leukocyte elastase inhibitor OS=Homo sapiens GN=SERPINB1 PE=1 SV=1                       | ILEU_HUMAN  | 43  | 0 | 0 | 1 | 0 |
| 26S proteasome non-ATPase regulatory subunit 13 OS=Homo sapiens GN=PSMD13 PE=1 SV=4      | PSD13_HUMAN | 43  | 0 | 0 | 1 | 0 |
| Poly(rC)-binding protein 2 OS=Homo sapiens GN=PCBP2 PE=1 SV=1                            | PCBP2_HUMAN | 39  | 0 | 0 | 1 | 0 |
| Cathepsin B OS=Homo sapiens GN=CTSB PE=1 SV=3                                            | CATB_HUMAN  | 38  | 0 | 0 | 1 | 0 |
| Eukaryotic translation initiation factor 3 subunit F OS=Homo sapiens GN=EIF3F PE=1 SV=1  | EIF3F_HUMAN | 38  | 0 | 0 | 1 | 0 |
| Pro-cathepsin H OS=Homo sapiens GN=CTSH PE=1 SV=4                                        | CATH_HUMAN  | 37  | 0 | 0 | 1 | 0 |

|                                                                                         |             |     |    |    |    |    |
|-----------------------------------------------------------------------------------------|-------------|-----|----|----|----|----|
| Nucleoporin Nup37 OS=Homo sapiens GN=NUP37 PE=1 SV=1                                    | NUP37_HUMAN | 37  | 0  | 0  | 1  | 0  |
| Tumor-associated calcium signal transducer 2 OS=Homo sapiens GN=TACSTD2 PE=1 SV=3       | TACD2_HUMAN | 36  | 0  | 1  | 1  | 1  |
| Inorganic pyrophosphatase OS=Homo sapiens GN=PPA1 PE=1 SV=2                             | IPYR_HUMAN  | 33  | 0  | 0  | 1  | 0  |
| Protein SET OS=Homo sapiens GN=SET PE=1 SV=3                                            | SET_HUMAN   | 33  | 0  | 0  | 1  | 0  |
| Serine/threonine-protein phosphatase PGAM5, mitochondrial OS=Homo sapiens GN=PGAM5      | PGAM5_HUMAN | 32  | 0  | 0  | 1  | 0  |
| Phosphoglycerate mutase 1 OS=Homo sapiens GN=PGAM1 PE=1 SV=2                            | PGAM1_HUMAN | 29  | 0  | 0  | 1  | 0  |
| Proteasome subunit alpha type-7-like OS=Homo sapiens GN=PSMA8 PE=1 SV=3                 | PSA7L_HUMAN | 29  | 0  | 0  | 1  | 0  |
| 14-3-3 protein gamma OS=Homo sapiens GN=YWHAG PE=1 SV=2                                 | 1433G_HUMAN | 28  | 0  | 0  | 1  | 0  |
| 14-3-3 protein theta OS=Homo sapiens GN=YWHAQ PE=1 SV=1                                 | 1433T_HUMAN | 28  | 0  | 0  | 1  | 0  |
| Proteasome subunit alpha type-7 OS=Homo sapiens GN=PSMA7 PE=1 SV=1                      | PSA7_HUMAN  | 28  | 0  | 0  | 1  | 0  |
| 3-hydroxyacyl-CoA dehydrogenase type-2 OS=Homo sapiens GN=HSD17B10 PE=1 SV=3            | HCD2_HUMAN  | 27  | 0  | 0  | 1  | 0  |
| THO complex subunit 4 OS=Homo sapiens GN=ALYREF PE=1 SV=3                               | THOC4_HUMAN | 27  | 0  | 1  | 1  | 1  |
| Galectin-3 OS=Homo sapiens GN=LGALS3 PE=1 SV=5                                          | LEG3_HUMAN  | 26  | 0  | 0  | 1  | 0  |
| LDLR chaperone MESD OS=Homo sapiens GN=MESDC2 PE=1 SV=2                                 | MESD_HUMAN  | 26  | 0  | 0  | 1  | 0  |
| Proteasome subunit beta type-6 OS=Homo sapiens GN=PSMB6 PE=1 SV=4                       | PSB6_HUMAN  | 25  | 0  | 0  | 1  | 0  |
| Superoxide dismutase [Mn], mitochondrial OS=Homo sapiens GN=SOD2 PE=1 SV=2              | SODM_HUMAN  | 25  | 0  | 0  | 1  | 0  |
| Proteasome subunit beta type-3 OS=Homo sapiens GN=PSMB3 PE=1 SV=2                       | PSB3_HUMAN  | 23  | 0  | 0  | 1  | 0  |
| Cell division control protein 42 homolog OS=Homo sapiens GN=CDC42 PE=1 SV=2             | CDC42_HUMAN | 21  | 0  | 0  | 1  | 0  |
| UPF0556 protein C19orf10 OS=Homo sapiens GN=C19orf10 PE=1 SV=1                          | CS010_HUMAN | 19  | 0  | 0  | 1  | 0  |
| IQ domain-containing protein J OS=Homo sapiens GN=IQCJ PE=2 SV=1                        | IQCJ_HUMAN  | 18  | 0  | 0  | 1  | 0  |
| Nucleoside diphosphate kinase B OS=Homo sapiens GN=NME2 PE=1 SV=1                       | NDKB_HUMAN  | 17  | 0  | 0  | 1  | 0  |
| Profilin-1 OS=Homo sapiens GN=PFN1 PE=1 SV=2                                            | PROF1_HUMAN | 15  | 0  | 0  | 1  | 0  |
| Thioredoxin OS=Homo sapiens GN=TXN PE=1 SV=3                                            | THIO_HUMAN  | 12  | 0  | 0  | 1  | 0  |
| Ubiquitin carboxyl-terminal hydrolase 7 OS=Homo sapiens GN=USP7 PE=1 SV=2               | UBP7_HUMAN  | 128 | 0  | 0  | 1  | 0  |
| V-type proton ATPase catalytic subunit A OS=Homo sapiens GN=ATP6V1A PE=1 SV=2           | VATA_HUMAN  | 68  | 0  | 0  | 1  | 0  |
| Lupus La protein OS=Homo sapiens GN=SSB PE=1 SV=2                                       | LA_HUMAN    | 47  | 0  | 0  | 1  | 0  |
| Intraflagellar transport protein 27 homolog OS=Homo sapiens GN=IFT27 PE=1 SV=1          | IFT27_HUMAN | 20  | 0  | 0  | 1  | 0  |
| Aminoacyl tRNA synthase complex-interacting multifunctional protein 2 OS=Homo sapiens G | AIMP2_HUMAN | 35  | 0  | 0  | 1  | 0  |
| Lysine--tRNA ligase OS=Homo sapiens GN=KARS PE=1 SV=3                                   | SYK_HUMAN   | 68  | 0  | 0  | 1  | 0  |
| Early endosome antigen 1 OS=Homo sapiens GN=EEA1 PE=1 SV=2                              | EEA1_HUMAN  | 162 | 0  | 2  | 2  | 2  |
| Integrin alpha-2 OS=Homo sapiens GN=ITGA2 PE=1 SV=1                                     | ITA2_HUMAN  | 129 | 0  | 0  | 2  | 0  |
| Cadherin-1 OS=Homo sapiens GN=CDH1 PE=1 SV=3                                            | CADH1_HUMAN | 97  | 0  | 1  | 2  | 1  |
| Glutamine--tRNA ligase OS=Homo sapiens GN=QARS PE=1 SV=1                                | SYQ_HUMAN   | 88  | 0  | 0  | 2  | 0  |
| Glycine--tRNA ligase OS=Homo sapiens GN=GARS PE=1 SV=3                                  | SYG_HUMAN   | 83  | 0  | 0  | 2  | 0  |
| N-acetylgalactosaminyltransferase 7 OS=Homo sapiens GN=GALNT7 PE=1 SV=1                 | GALT7_HUMAN | 75  | 0  | 0  | 2  | 0  |
| Sec1 family domain-containing protein 1 OS=Homo sapiens GN=SCFD1 PE=1 SV=4              | SCFD1_HUMAN | 72  | 0  | 0  | 2  | 0  |
| Insulin-like growth factor 2 mRNA-binding protein 3 OS=Homo sapiens GN=IGF2BP3 PE=1 SV- | IF2B3_HUMAN | 64  | 0  | 1  | 2  | 1  |
| Glutathione reductase, mitochondrial OS=Homo sapiens GN=GSR PE=1 SV=2                   | GSHR_HUMAN  | 56  | 0  | 0  | 2  | 0  |
| Peptidyl-prolyl cis-trans isomerase FKBP4 OS=Homo sapiens GN=FKBP4 PE=1 SV=3            | FKBP4_HUMAN | 52  | 0  | 0  | 2  | 0  |
| Regulator of chromosome condensation OS=Homo sapiens GN=RCC1 PE=1 SV=1                  | RCC1_HUMAN  | 45  | 0  | 0  | 2  | 0  |
| Prostaglandin E synthase 2 OS=Homo sapiens GN=PTGES2 PE=1 SV=1                          | PGES2_HUMAN | 42  | 0  | 0  | 2  | 0  |
| Fructose-bisphosphate aldolase C OS=Homo sapiens GN=ALDOC PE=1 SV=2                     | ALDOC_HUMAN | 39  | 0  | 0  | 2  | 0  |
| Prostaglandin reductase 1 OS=Homo sapiens GN=PTGR1 PE=1 SV=2                            | PTGR1_HUMAN | 36  | 0  | 0  | 2  | 0  |
| Proteasome subunit beta type-4 OS=Homo sapiens GN=PSMB4 PE=1 SV=4                       | PSB4_HUMAN  | 29  | 0  | 0  | 2  | 0  |
| Chloride intracellular channel protein 1 OS=Homo sapiens GN=CLIC1 PE=1 SV=2             | CLIC1_HUMAN | 27  | 0  | 0  | 2  | 0  |
| Adenylate kinase 2, mitochondrial OS=Homo sapiens GN=AK2 PE=1 SV=2                      | KAD2_HUMAN  | 26  | 0  | 0  | 2  | 0  |
| Peroxioredoxin-6 OS=Homo sapiens GN=PRDX6 PE=1 SV=3                                     | PRDX6_HUMAN | 25  | 0  | 0  | 2  | 0  |
| ADP-ribosylation factor 6 OS=Homo sapiens GN=ARF6 PE=1 SV=2                             | ARF6_HUMAN  | 20  | 0  | 0  | 2  | 0  |
| Superoxide dismutase [Cu-Zn] OS=Homo sapiens GN=SOD1 PE=1 SV=2                          | SODC_HUMAN  | 16  | 0  | 0  | 2  | 0  |
| Lysosomal alpha-glucosidase OS=Homo sapiens GN=GAA PE=1 SV=4                            | LYAG_HUMAN  | 105 | 0  | 0  | 3  | 0  |
| Glycogen phosphorylase, liver form OS=Homo sapiens GN=PYGL PE=1 SV=4                    | PYGL_HUMAN  | 97  | 0  | 0  | 3  | 0  |
| Phosphoglycerate kinase 1 OS=Homo sapiens GN=PGK1 PE=1 SV=3                             | PGK1_HUMAN  | 45  | 0  | 0  | 3  | 0  |
| Proteasome subunit alpha type-4 OS=Homo sapiens GN=PSMA4 PE=1 SV=1                      | PSA4_HUMAN  | 29  | 0  | 0  | 3  | 0  |
| Eukaryotic translation initiation factor 3 subunit I OS=Homo sapiens GN=EIF31 PE=1 SV=1 | EIF31_HUMAN | 37  | 0  | 0  | 3  | 0  |
| 14-3-3 protein epsilon OS=Homo sapiens GN=YWHAE PE=1 SV=1                               | 1433E_HUMAN | 29  | 0  | 0  | 3  | 0  |
| Eukaryotic translation initiation factor 4 gamma 1 OS=Homo sapiens GN=EIF4G1 PE=1 SV=4  | IF4G1_HUMAN | 175 | 0  | 0  | 4  | 0  |
| Nicotinamide phosphoribosyltransferase OS=Homo sapiens GN=NAMPT PE=1 SV=1               | NAMPT_HUMAN | 56  | 0  | 0  | 4  | 0  |
| Triosephosphate isomerase OS=Homo sapiens GN=TP11 PE=1 SV=3                             | TPIS_HUMAN  | 31  | 0  | 0  | 6  | 0  |
| Keratin, type I cytoskeletal 19 OS=Homo sapiens GN=KRT19 PE=1 SV=4                      | K1C19_HUMAN | 44  | 17 | 20 | 26 | 22 |
| Nucleoprotein TPR OS=Homo sapiens GN=TPR PE=1 SV=3                                      | TPR_HUMAN   | 267 | 11 | 13 | 9  | 25 |
| 116 kDa U5 small nuclear ribonucleoprotein component OS=Homo sapiens GN=EFTUD2 PE=1     | U5S1_HUMAN  | 109 | 4  | 6  | 2  | 13 |
| Peroxisomal multifunctional enzyme type 2 OS=Homo sapiens GN=HSD17B4 PE=1 SV=3          | DHB4_HUMAN  | 80  | 4  | 0  | 0  | 4  |
| X-ray repair cross-complementing protein 6 OS=Homo sapiens GN=XRCC6 PE=1 SV=2           | XRCC6_HUMAN | 70  | 1  | 1  | 0  | 3  |
| Calreticulin OS=Homo sapiens GN=CALR PE=1 SV=1                                          | CALR_HUMAN  | 48  | 3  | 0  | 14 | 0  |
| Importin subunit beta-1 OS=Homo sapiens GN=KPNB1 PE=1 SV=2                              | IMB1_HUMAN  | 97  | 3  | 2  | 5  | 2  |
| Stress-70 protein, mitochondrial OS=Homo sapiens GN=HSPA9 PE=1 SV=2                     | GRP75_HUMAN | 74  | 2  | 3  | 3  | 3  |
| Alpha-enolase OS=Homo sapiens GN=ENO1 PE=1 SV=2                                         | ENOA_HUMAN  | 47  | 0  | 0  | 6  | 0  |
| L-lactate dehydrogenase B chain OS=Homo sapiens GN=LDHB PE=1 SV=2                       | LDHB_HUMAN  | 37  | 0  | 0  | 3  | 0  |
| Heterogeneous nuclear ribonucleoprotein D0 OS=Homo sapiens GN=HNRNPD PE=1 SV=1          | HNRPD_HUMAN | 38  | 0  | 3  | 2  | 3  |
| Programmed cell death protein 6 OS=Homo sapiens GN=PDCC6 PE=1 SV=1                      | PDCC6_HUMAN | 22  | 0  | 0  | 0  | 0  |
| Ras-related protein Rab-10 OS=Homo sapiens GN=RAB10 PE=1 SV=1                           | RAB10_HUMAN | 23  | 0  | 1  | 1  | 1  |
| Aldehyde dehydrogenase X, mitochondrial OS=Homo sapiens GN=ALDH1B1 PE=1 SV=3            | AL1B1_HUMAN | 57  | 0  | 0  | 0  | 0  |
| Integrin beta-1 OS=Homo sapiens GN=ITGB1 PE=1 SV=2                                      | ITB1_HUMAN  | 88  | 0  | 0  | 0  | 0  |
| 60S acidic ribosomal protein P0 OS=Homo sapiens GN=RPLP0 PE=1 SV=1                      | RLA0_HUMAN  | 34  | 0  | 0  | 1  | 0  |
| Serum paraoxonase/arylesterase 2 OS=Homo sapiens GN=PON2 PE=1 SV=3                      | PON2_HUMAN  | 39  | 0  | 0  | 0  | 0  |
| ATP-binding cassette sub-family E member 1 OS=Homo sapiens GN=ABCE1 PE=1 SV=1           | ABCE1_HUMAN | 67  | 0  | 0  | 0  | 0  |
| Caldesmon OS=Homo sapiens GN=CALD1 PE=1 SV=3                                            | CALD1_HUMAN | 93  | 0  | 0  | 0  | 0  |
| ATP-dependent RNA helicase DDX24 OS=Homo sapiens GN=DDX24 PE=1 SV=1                     | DDX24_HUMAN | 96  | 0  | 0  | 0  | 0  |
| Disintegrin and metalloproteinase domain-containing protein 10 OS=Homo sapiens GN=ADAI  | ADA10_HUMAN | 84  | 0  | 0  | 0  | 0  |
| Dihydropyrimidinase-related protein 1 OS=Homo sapiens GN=CRMP1 PE=1 SV=1                | DPYL1_HUMAN | 62  | 0  | 0  | 0  | 0  |
| Voltage-gated potassium channel subunit beta-1 OS=Homo sapiens GN=KCNAB1 PE=2 SV=1      | KCAB1_HUMAN | 47  | 0  | 0  | 0  | 0  |

|                                                                                           |              |     |   |    |    |    |
|-------------------------------------------------------------------------------------------|--------------|-----|---|----|----|----|
| Vesicle-associated membrane protein-associated protein A OS=Homo sapiens GN=VAPA PE=1     | VAPA_HUMAN   | 28  | 0 | 0  | 0  | 0  |
| Ras-related protein Rab-13 OS=Homo sapiens GN=RAB13 PE=1 SV=1                             | RAB13_HUMAN  | 23  | 0 | 0  | 0  | 0  |
| Cofilin-2 OS=Homo sapiens GN=CLF2 PE=1 SV=1                                               | COF2_HUMAN   | 19  | 0 | 1  | 0  | 1  |
| 40S ribosomal protein S29 OS=Homo sapiens GN=RPS29 PE=1 SV=2                              | RS29_HUMAN   | 7   | 0 | 0  | 0  | 0  |
| Vigilin OS=Homo sapiens GN=HDLBP PE=1 SV=2                                                | VIGLN_HUMAN  | 141 | 0 | 0  | 0  | 0  |
| Band 4.1-like protein 2 OS=Homo sapiens GN=EPB41L2 PE=1 SV=1                              | E41L2_HUMAN  | 113 | 0 | 0  | 0  | 0  |
| Zinc finger protein 254 OS=Homo sapiens GN=ZNF254 PE=2 SV=3                               | ZN254_HUMAN  | 77  | 0 | 0  | 0  | 0  |
| Ras GTPase-activating protein-binding protein 2 OS=Homo sapiens GN=G3BP2 PE=1 SV=2        | G3BP2_HUMAN  | 54  | 0 | 0  | 0  | 0  |
| Carbonic anhydrase 12 OS=Homo sapiens GN=CA12 PE=1 SV=1                                   | CAH12_HUMAN  | 39  | 0 | 0  | 0  | 0  |
| 40S ribosomal protein S27 OS=Homo sapiens GN=RPS27 PE=1 SV=3                              | RS27_HUMAN   | 9   | 0 | 0  | 0  | 0  |
| Histone-binding protein RBBP4 OS=Homo sapiens GN=RBBP4 PE=1 SV=3                          | RBBP4_HUMAN  | 48  | 0 | 1  | 1  | 1  |
| HLA class I histocompatibility antigen, A-1 alpha chain OS=Homo sapiens GN=HLA-A PE=1 SV= | 1A01_HUMAN   | 41  | 0 | 0  | 1  | 0  |
| Activator of 90 kDa heat shock protein ATPase homolog 1 OS=Homo sapiens GN=AHSA1 PE=1     | AHSA1_HUMAN  | 38  | 0 | 0  | 1  | 0  |
| Enoyl-CoA hydratase, mitochondrial OS=Homo sapiens GN=ECHS1 PE=1 SV=4                     | ECHM_HUMAN   | 31  | 0 | 0  | 1  | 0  |
| Proteasome subunit beta type-5 OS=Homo sapiens GN=PSMB5 PE=1 SV=3                         | PSB5_HUMAN   | 28  | 0 | 0  | 2  | 0  |
| Proteasome subunit alpha type-6 OS=Homo sapiens GN=PSMA6 PE=1 SV=1                        | PSA6_HUMAN   | 27  | 0 | 0  | 2  | 0  |
| Polymerase I and transcript release factor OS=Homo sapiens GN=PTRF PE=1 SV=1              | PTRF_HUMAN   | 43  | 0 | 3  | 0  | 4  |
| 40S ribosomal protein S18 OS=Homo sapiens GN=RPS18 PE=1 SV=3                              | RS18_HUMAN   | 18  | 0 | 0  | 1  | 1  |
| ATP-dependent RNA helicase A OS=Homo sapiens GN=DHX9 PE=1 SV=4                            | DHX9_HUMAN   | 141 | 2 | 10 | 6  | 15 |
| Guanine nucleotide-binding protein G(k) subunit alpha OS=Homo sapiens GN=GNAI3 PE=1 SV    | GNAI3_HUMAN  | 41  | 1 | 1  | 2  | 2  |
| Nuclear pore complex protein Nup133 OS=Homo sapiens GN=NUP133 PE=1 SV=2                   | NU133_HUMAN  | 129 | 0 | 1  | 1  | 3  |
| Methionine--tRNA ligase, cytoplasmic OS=Homo sapiens GN=MARS PE=1 SV=2                    | SYMC_HUMAN   | 101 | 3 | 0  | 6  | 1  |
| Vimentin OS=Homo sapiens GN=VIM PE=1 SV=4                                                 | VIME_HUMAN   | 54  | 0 | 0  | 0  | 1  |
| Prohibitin-2 OS=Homo sapiens GN=PHB2 PE=1 SV=2                                            | PHB2_HUMAN   | 33  | 0 | 2  | 0  | 3  |
| rRNA 2'-O-methyltransferase fibrillarin OS=Homo sapiens GN=FBP1 PE=1 SV=2                 | FBRL_HUMAN   | 34  | 0 | 0  | 0  | 1  |
| Transformer-2 protein homolog beta OS=Homo sapiens GN=TRA2B PE=1 SV=1                     | TRA2B_HUMAN  | 34  | 0 | 0  | 0  | 1  |
| Unconventional myosin-IId OS=Homo sapiens GN=MYO1D PE=1 SV=2                              | MYO1D_HUMAN  | 116 | 0 | 2  | 0  | 4  |
| Extended synaptotagmin-1 OS=Homo sapiens GN=ESYT1 PE=1 SV=1                               | ESYT1_HUMAN  | 123 | 0 | 0  | 0  | 1  |
| Heterogeneous nuclear ribonucleoprotein R OS=Homo sapiens GN=HNRNPR PE=1 SV=1             | HNRPR_HUMAN  | 71  | 0 | 1  | 0  | 4  |
| Glucose-6-phosphate 1-dehydrogenase OS=Homo sapiens GN=G6PD PE=1 SV=4                     | G6PD_HUMAN   | 59  | 3 | 0  | 9  | 1  |
| Filamin-A OS=Homo sapiens GN=FLNA PE=1 SV=4                                               | FLNA_HUMAN   | 281 | 2 | 24 | 14 | 27 |
| 60S ribosomal protein L5 OS=Homo sapiens GN=RPL5 PE=1 SV=3                                | RL5_HUMAN    | 34  | 1 | 1  | 3  | 3  |
| Transportin-1 OS=Homo sapiens GN=TNPO1 PE=1 SV=2                                          | TNPO1_HUMAN  | 102 | 1 | 0  | 2  | 1  |
| Complement component 1 Q subcomponent-binding protein, mitochondrial OS=Homo sapien       | C1QB_P_HUMAN | 31  | 0 | 0  | 0  | 2  |
| DBIRD complex subunit KIAA1967 OS=Homo sapiens GN=KIAA1967 PE=1 SV=2                      | K1967_HUMAN  | 103 | 0 | 0  | 4  | 4  |
| Fascin OS=Homo sapiens GN=FSCN1 PE=1 SV=3                                                 | FSCN1_HUMAN  | 55  | 1 | 2  | 3  | 6  |
| 40S ribosomal protein S3a OS=Homo sapiens GN=RPS3A PE=1 SV=2                              | RS3A_HUMAN   | 30  | 0 | 0  | 3  | 1  |
| Actin, alpha cardiac muscle 1 OS=Homo sapiens GN=ACTC1 PE=1 SV=1                          | ACTC_HUMAN   | 42  | 0 | 0  | 4  | 1  |
| E3 SUMO-protein ligase RanBP2 OS=Homo sapiens GN=RANBP2 PE=1 SV=2                         | RBP2_HUMAN   | 358 | 6 | 6  | 9  | 8  |
| Eukaryotic translation initiation factor 3 subunit L OS=Homo sapiens GN=EIF3L PE=1 SV=1   | EIF3L_HUMAN  | 67  | 0 | 0  | 5  | 2  |
| Nuclear pore complex protein Nup160 OS=Homo sapiens GN=NUP160 PE=1 SV=3                   | NU160_HUMAN  | 162 | 0 | 0  | 0  | 4  |
| Nuclear mitotic apparatus protein 1 OS=Homo sapiens GN=NUMA1 PE=1 SV=2                    | NUMA1_HUMAN  | 238 | 7 | 15 | 9  | 28 |
| Heterogeneous nuclear ribonucleoprotein M OS=Homo sapiens GN=HNRNPM PE=1 SV=3             | HNRPM_HUMAN  | 78  | 2 | 5  | 3  | 7  |
| Heterogeneous nuclear ribonucleoprotein F OS=Homo sapiens GN=HNRNPF PE=1 SV=3             | HNRPF_HUMAN  | 46  | 1 | 1  | 2  | 2  |
| Probable ATP-dependent RNA helicase DDX17 OS=Homo sapiens GN=DDX17 PE=1 SV=2              | DDX17_HUMAN  | 80  | 1 | 3  | 2  | 7  |
| Catenin beta-1 OS=Homo sapiens GN=CTNNB1 PE=1 SV=1                                        | CTNB1_HUMAN  | 85  | 1 | 2  | 2  | 3  |
| 60S ribosomal protein L3 OS=Homo sapiens GN=RPL3 PE=1 SV=2                                | RL3_HUMAN    | 46  | 0 | 0  | 1  | 1  |
| RNA-binding protein FUS OS=Homo sapiens GN=FUS PE=1 SV=1                                  | FUS_HUMAN    | 53  | 0 | 0  | 1  | 1  |
| Non-POU domain-containing octamer-binding protein OS=Homo sapiens GN=NONO PE=1 SV:        | NONO_HUMAN   | 54  | 0 | 1  | 4  | 3  |
| X-ray repair cross-complementing protein 5 OS=Homo sapiens GN=XRCC5 PE=1 SV=3             | XRCC5_HUMAN  | 83  | 0 | 1  | 5  | 3  |
| Long-chain-fatty-acid--CoA ligase 3 OS=Homo sapiens GN=ACSL3 PE=1 SV=3                    | ACSL3_HUMAN  | 80  | 0 | 2  | 1  | 3  |
| Myb-binding protein 1A OS=Homo sapiens GN=MYBBP1A PE=1 SV=2                               | MBB1A_HUMAN  | 149 | 0 | 0  | 0  | 2  |
| Heterogeneous nuclear ribonucleoprotein Q OS=Homo sapiens GN=SYNCRIP PE=1 SV=2            | HNRPQ_HUMAN  | 70  | 0 | 6  | 2  | 13 |
| Arginine--tRNA ligase, cytoplasmic OS=Homo sapiens GN=RARS PE=1 SV=2                      | SYRC_HUMAN   | 75  | 0 | 1  | 1  | 2  |
| Twinfilin-2 OS=Homo sapiens GN=TWf2 PE=1 SV=2                                             | TWF2_HUMAN   | 40  | 0 | 1  | 1  | 3  |
| Flotillin-2 OS=Homo sapiens GN=FLOT2 PE=1 SV=2                                            | FLOT2_HUMAN  | 47  | 0 | 1  | 0  | 4  |
| Double-strand break repair protein MRE11A OS=Homo sapiens GN=MRE11A PE=1 SV=3             | MRE11_HUMAN  | 81  | 0 | 0  | 1  | 1  |
| Neurabin-1 OS=Homo sapiens GN=PPP1R9A PE=1 SV=2                                           | NEB1_HUMAN   | 123 | 0 | 2  | 0  | 8  |
| Neutral alpha-glucosidase AB OS=Homo sapiens GN=GANAB PE=1 SV=3                           | GANAB_HUMAN  | 107 | 8 | 0  | 28 | 1  |
| Transitional endoplasmic reticulum ATPase OS=Homo sapiens GN=VCP PE=1 SV=4                | TERA_HUMAN   | 89  | 5 | 2  | 12 | 4  |
| 26S proteasome non-ATPase regulatory subunit 1 OS=Homo sapiens GN=PSMD1 PE=1 SV=2         | PSMD1_HUMAN  | 106 | 2 | 0  | 3  | 2  |
| Neutrophil gelatinase-associated lipocalin OS=Homo sapiens GN=LCN2 PE=1 SV=2              | NGAL_HUMAN   | 23  | 2 | 0  | 3  | 1  |
| Coatome subunit alpha OS=Homo sapiens GN=COPA PE=1 SV=2                                   | COPA_HUMAN   | 138 | 1 | 0  | 10 | 4  |
| T-complex protein 1 subunit zeta OS=Homo sapiens GN=CCT6A PE=1 SV=3                       | TCPZ_HUMAN   | 58  | 1 | 0  | 5  | 1  |
| Bifunctional glutamate/proline--tRNA ligase OS=Homo sapiens GN=EPRS PE=1 SV=5             | SYEP_HUMAN   | 171 | 1 | 0  | 6  | 7  |
| Splicing factor 3B subunit 2 OS=Homo sapiens GN=SF3B2 PE=1 SV=2                           | SF3B2_HUMAN  | 100 | 1 | 0  | 2  | 5  |
| Keratin, type II cytoskeletal 3 OS=Homo sapiens GN=KRT3 PE=1 SV=3                         | K2C3_HUMAN   | 64  | 1 | 1  | 2  | 3  |
| Splicing factor 3A subunit 1 OS=Homo sapiens GN=SF3A1 PE=1 SV=1                           | SF3A1_HUMAN  | 89  | 1 | 1  | 3  | 3  |
| T-complex protein 1 subunit eta OS=Homo sapiens GN=CCT7 PE=1 SV=2                         | TCPH_HUMAN   | 59  | 0 | 0  | 2  | 1  |
| Isoleucine--tRNA ligase, cytoplasmic OS=Homo sapiens GN=IARS PE=1 SV=2                    | SYIC_HUMAN   | 145 | 0 | 0  | 1  | 2  |
| Reticulon-4 OS=Homo sapiens GN=RTN4 PE=1 SV=2                                             | RTN4_HUMAN   | 130 | 0 | 0  | 1  | 1  |
| Splicing factor U2AF 65 kDa subunit OS=Homo sapiens GN=U2AF2 PE=1 SV=4                    | U2AF2_HUMAN  | 54  | 0 | 0  | 1  | 2  |
| Polypyrimidine tract-binding protein 1 OS=Homo sapiens GN=PTBP1 PE=1 SV=1                 | PTBP1_HUMAN  | 57  | 0 | 2  | 3  | 4  |
| Aspartate--tRNA ligase, cytoplasmic OS=Homo sapiens GN=DARS PE=1 SV=2                     | SYDC_HUMAN   | 57  | 0 | 0  | 3  | 1  |
| Pericentriolar material 1 protein OS=Homo sapiens GN=PCM1 PE=1 SV=4                       | PCM1_HUMAN   | 229 | 0 | 1  | 0  | 3  |
| Pre-mRNA-processing-splicing factor 8 OS=Homo sapiens GN=PRPF8 PE=1 SV=2                  | PRP8_HUMAN   | 274 | 0 | 4  | 1  | 7  |
| E3 ubiquitin-protein ligase UBR4 OS=Homo sapiens GN=UBR4 PE=1 SV=1                        | UBR4_HUMAN   | 574 | 0 | 0  | 0  | 1  |
| Ankyrin-3 OS=Homo sapiens GN=ANK3 PE=1 SV=3                                               | ANK3_HUMAN   | 480 | 0 | 0  | 0  | 1  |
| Laminin subunit alpha-5 OS=Homo sapiens GN=LAMA5 PE=1 SV=8                                | LAMA5_HUMAN  | 400 | 0 | 3  | 0  | 7  |
| Zinc finger homeobox protein 4 OS=Homo sapiens GN=ZFX4 PE=1 SV=1                          | ZFX4_HUMAN   | 394 | 0 | 0  | 0  | 1  |
| Golgin subfamily B member 1 OS=Homo sapiens GN=GOLGB1 PE=1 SV=2                           | GOGB1_HUMAN  | 376 | 0 | 9  | 0  | 18 |

|                                                                                                        |              |     |   |    |    |    |
|--------------------------------------------------------------------------------------------------------|--------------|-----|---|----|----|----|
| Laminin subunit alpha-3 OS=Homo sapiens GN=LAMA3 PE=1 SV=2                                             | LAMA3_HUMAN  | 367 | 0 | 0  | 0  | 1  |
| Cation-independent mannose-6-phosphate receptor OS=Homo sapiens GN=IGF2R PE=1 SV=3                     | MPRI_HUMAN   | 274 | 0 | 0  | 0  | 2  |
| Protein SON OS=Homo sapiens GN=SON PE=1 SV=4                                                           | SON_HUMAN    | 264 | 0 | 0  | 0  | 1  |
| Signal-induced proliferation-associated 1-like protein 1 OS=Homo sapiens GN=SIPA1L1 PE=1 SV=2          | SI1L1_HUMAN  | 200 | 0 | 0  | 0  | 1  |
| Laminin subunit beta-2 OS=Homo sapiens GN=LAMB2 PE=1 SV=2                                              | LAMB2_HUMAN  | 196 | 0 | 0  | 0  | 1  |
| PH domain leucine-rich repeat-containing protein phosphatase 1 OS=Homo sapiens GN=PHLP1                | PHLP1_HUMAN  | 185 | 0 | 0  | 0  | 1  |
| THO complex subunit 2 OS=Homo sapiens GN=THOC2 PE=1 SV=2                                               | THOC2_HUMAN  | 183 | 0 | 0  | 0  | 2  |
| Laminin subunit gamma-1 OS=Homo sapiens GN=LAMC1 PE=1 SV=3                                             | LAMC1_HUMAN  | 178 | 0 | 2  | 0  | 5  |
| Protein scribble homolog OS=Homo sapiens GN=SCRIB PE=1 SV=4                                            | SCRIB_HUMAN  | 175 | 0 | 0  | 0  | 1  |
| Canalicular multispecific organic anion transporter 1 OS=Homo sapiens GN=ABCC2 PE=1 SV=3               | MRP2_HUMAN   | 174 | 0 | 0  | 0  | 3  |
| Structural maintenance of chromosomes protein 1A OS=Homo sapiens GN=SMC1A PE=1 SV=2                    | SMC1A_HUMAN  | 143 | 0 | 0  | 0  | 5  |
| Structural maintenance of chromosomes protein 3 OS=Homo sapiens GN=SMC3 PE=1 SV=2                      | SMC3_HUMAN   | 142 | 0 | 0  | 0  | 2  |
| SWI/SNF complex subunit SMARCC2 OS=Homo sapiens GN=SMARCC2 PE=1 SV=1                                   | SMRC2_HUMAN  | 133 | 0 | 1  | 0  | 2  |
| Coiled-coil domain-containing protein 73 OS=Homo sapiens GN=CCDC73 PE=2 SV=2                           | CCD73_HUMAN  | 124 | 0 | 0  | 0  | 1  |
| Leucine zipper protein 1 OS=Homo sapiens GN=LUZP1 PE=1 SV=2                                            | LUZP1_HUMAN  | 120 | 0 | 0  | 0  | 1  |
| Superkiller viralicidic activity 2-like 2 OS=Homo sapiens GN=SKIV2L2 PE=1 SV=3                         | SK2L2_HUMAN  | 118 | 0 | 1  | 0  | 4  |
| Zinc finger RNA-binding protein OS=Homo sapiens GN=ZFR PE=1 SV=2                                       | ZFR_HUMAN    | 117 | 0 | 0  | 0  | 1  |
| Klotho OS=Homo sapiens GN=KL PE=1 SV=2                                                                 | KLOT_HUMAN   | 116 | 0 | 0  | 0  | 1  |
| Serine/threonine-protein kinase 31 OS=Homo sapiens GN=STK31 PE=2 SV=2                                  | STK31_HUMAN  | 116 | 0 | 0  | 0  | 1  |
| Pre-mRNA-processing factor 40 homolog A OS=Homo sapiens GN=PRPF40A PE=1 SV=2                           | PR40A_HUMAN  | 109 | 0 | 0  | 0  | 2  |
| Probable 2-oxoglutarate dehydrogenase E1 component DHKTD1, mitochondrial OS=Homo sapiens               | DHTK1_HUMAN  | 103 | 0 | 0  | 0  | 1  |
| Scaffold attachment factor B1 OS=Homo sapiens GN=SAFB PE=1 SV=4                                        | SAFB1_HUMAN  | 103 | 0 | 1  | 0  | 6  |
| Serrate RNA effector molecule homolog OS=Homo sapiens GN=SRRT PE=1 SV=1                                | SRRT_HUMAN   | 101 | 0 | 0  | 0  | 1  |
| Cadherin-3 OS=Homo sapiens GN=CDH3 PE=1 SV=2                                                           | CADH3_HUMAN  | 91  | 0 | 0  | 0  | 1  |
| Procollagen-lysine,2-oxoglutarate 5-dioxygenase 1 OS=Homo sapiens GN=PLOD1 PE=1 SV=2                   | PLOD1_HUMAN  | 84  | 0 | 0  | 0  | 1  |
| Ribosomal biogenesis protein LAS1L OS=Homo sapiens GN=LAS1L PE=1 SV=2                                  | LAS1L_HUMAN  | 83  | 0 | 0  | 0  | 1  |
| Peroxisomal acyl-coenzyme A oxidase 1 OS=Homo sapiens GN=ACOX1 PE=1 SV=3                               | ACOX1_HUMAN  | 74  | 0 | 0  | 0  | 1  |
| Doublecortin domain-containing protein 5 OS=Homo sapiens GN=DCDC5 PE=2 SV=2                            | DCDC5_HUMAN  | 73  | 0 | 0  | 0  | 1  |
| Procollagen galactosyltransferase 1 OS=Homo sapiens GN=COLGALT1 PE=1 SV=1                              | GT251_HUMAN  | 72  | 0 | 0  | 0  | 1  |
| Acyl-CoA dehydrogenase family member 9, mitochondrial OS=Homo sapiens GN=ACAD9 PE=1 SV=2               | ACAD9_HUMAN  | 69  | 0 | 0  | 0  | 1  |
| Lamin-B2 OS=Homo sapiens GN=LMNB2 PE=1 SV=3                                                            | LMNB2_HUMAN  | 68  | 0 | 0  | 0  | 1  |
| Insulin-like growth factor 2 mRNA-binding protein 2 OS=Homo sapiens GN=IGF2BP2 PE=1 SV=2               | IF2B2_HUMAN  | 66  | 0 | 1  | 0  | 3  |
| Leucine-rich repeat-containing protein 1 OS=Homo sapiens GN=LRRC1 PE=1 SV=1                            | LRRC1_HUMAN  | 59  | 0 | 0  | 0  | 1  |
| WD40 repeat-containing protein SMU1 OS=Homo sapiens GN=SMU1 PE=1 SV=2                                  | SMU1_HUMAN   | 58  | 0 | 1  | 0  | 2  |
| Histone deacetylase 2 OS=Homo sapiens GN=HDAC2 PE=1 SV=2                                               | HDAC2_HUMAN  | 55  | 0 | 0  | 0  | 1  |
| Pyruvate dehydrogenase protein X component, mitochondrial OS=Homo sapiens GN=PDHX P                    | ODPX_HUMAN   | 54  | 0 | 0  | 0  | 1  |
| Phenylalanine-4-hydroxylase OS=Homo sapiens GN=PAH PE=1 SV=1                                           | PH4H_HUMAN   | 52  | 0 | 0  | 0  | 1  |
| L-2-hydroxyglutarate dehydrogenase, mitochondrial OS=Homo sapiens GN=L2HGDH PE=1 SV=2                  | L2HGDH_HUMAN | 50  | 0 | 0  | 0  | 2  |
| Inositol hexakisphosphate kinase 3 OS=Homo sapiens GN=IP6K3 PE=1 SV=2                                  | IP6K3_HUMAN  | 46  | 0 | 0  | 0  | 1  |
| Neutral cholesterol ester hydrolase 1 OS=Homo sapiens GN=NCEH1 PE=1 SV=3                               | NCEH1_HUMAN  | 46  | 0 | 0  | 0  | 1  |
| 28S ribosomal protein S9, mitochondrial OS=Homo sapiens GN=MRPS9 PE=1 SV=2                             | RT09_HUMAN   | 46  | 0 | 0  | 0  | 1  |
| Pyruvate dehydrogenase E1 component subunit alpha, somatic form, mitochondrial OS=Homo sapiens         | ODPA_HUMAN   | 43  | 0 | 4  | 0  | 6  |
| Pyruvate dehydrogenase E1 component subunit alpha, testis-specific form, mitochondrial OS=Homo sapiens | ODPAT_HUMAN  | 43  | 0 | 1  | 0  | 2  |
| Nucleoporin Nup43 OS=Homo sapiens GN=NUP43 PE=1 SV=1                                                   | NUP43_HUMAN  | 42  | 0 | 0  | 0  | 1  |
| RNA-binding motif protein, X chromosome OS=Homo sapiens GN=RBMX PE=1 SV=3                              | RBMX_HUMAN   | 42  | 0 | 4  | 0  | 7  |
| Mitochondrial import inner membrane translocase subunit TIM50 OS=Homo sapiens GN=TIM50                 | TIM50_HUMAN  | 40  | 0 | 0  | 0  | 1  |
| D-beta-hydroxybutyrate dehydrogenase, mitochondrial OS=Homo sapiens GN=BDH1 PE=1 SV=2                  | BDH_HUMAN    | 38  | 0 | 0  | 0  | 1  |
| Voltage-dependent anion-selective channel protein 2 OS=Homo sapiens GN=VDAC2 PE=1 SV=2                 | VDAC2_HUMAN  | 32  | 0 | 1  | 0  | 2  |
| 39S ribosomal protein L21, mitochondrial OS=Homo sapiens GN=MRPL21 PE=1 SV=2                           | RM21_HUMAN   | 23  | 0 | 0  | 0  | 1  |
| 40S ribosomal protein S12 OS=Homo sapiens GN=RPS12 PE=1 SV=3                                           | RS12_HUMAN   | 15  | 0 | 0  | 0  | 1  |
| Dermcidin OS=Homo sapiens GN=DCD PE=1 SV=2                                                             | DCD_HUMAN    | 11  | 0 | 1  | 0  | 3  |
| U4/U6.U5 tri-snRNP-associated protein 1 OS=Homo sapiens GN=SART1 PE=1 SV=1                             | SNUT1_HUMAN  | 90  | 0 | 0  | 0  | 2  |
| Tight junction protein ZO-1 OS=Homo sapiens GN=TJP1 PE=1 SV=3                                          | ZO1_HUMAN    | 195 | 0 | 0  | 0  | 1  |
| Cohesin subunit SA-2 OS=Homo sapiens GN=STAG2 PE=1 SV=3                                                | STAG2_HUMAN  | 141 | 0 | 0  | 1  | 1  |
| Procollagen-lysine,2-oxoglutarate 5-dioxygenase 3 OS=Homo sapiens GN=PLOD3 PE=1 SV=1                   | PLOD3_HUMAN  | 85  | 0 | 0  | 1  | 1  |
| Gamma-adducin OS=Homo sapiens GN=ADD3 PE=1 SV=1                                                        | ADDG_HUMAN   | 79  | 0 | 0  | 1  | 1  |
| OTU domain-containing protein 5 OS=Homo sapiens GN=OTUD5 PE=1 SV=1                                     | OTUD5_HUMAN  | 61  | 0 | 0  | 1  | 1  |
| Transmembrane emp24 domain-containing protein 4 OS=Homo sapiens GN=TMED4 PE=1 SV=2                     | TMED4_HUMAN  | 26  | 0 | 0  | 1  | 1  |
| Cell division cycle and apoptosis regulator protein 1 OS=Homo sapiens GN=CCAR1 PE=1 SV=2               | CCAR1_HUMAN  | 133 | 0 | 0  | 2  | 1  |
| Protein phosphatase 1 regulatory subunit 12A OS=Homo sapiens GN=PPP1R12A PE=1 SV=1                     | MYPT1_HUMAN  | 115 | 0 | 2  | 2  | 4  |
| T-complex protein 1 subunit theta OS=Homo sapiens GN=CCT8 PE=1 SV=4                                    | TCPQ_HUMAN   | 60  | 0 | 0  | 2  | 1  |
| Leucine--tRNA ligase, cytoplasmic OS=Homo sapiens GN=LARS PE=1 SV=2                                    | SYLC_HUMAN   | 134 | 0 | 0  | 4  | 1  |
| Neuroblast differentiation-associated protein AHNK OS=Homo sapiens GN=AHNAK PE=1 SV=2                  | AHNK_HUMAN   | 629 | 6 | 11 | 13 | 15 |
| Major vault protein OS=Homo sapiens GN=MVP PE=1 SV=4                                                   | MVP_HUMAN    | 99  | 2 | 2  | 7  | 5  |
| Pre-mRNA-processing factor 19 OS=Homo sapiens GN=PRPF19 PE=1 SV=1                                      | PRP19_HUMAN  | 55  | 1 | 1  | 3  | 6  |
| Prolyl 4-hydroxylase subunit alpha-1 OS=Homo sapiens GN=P4HA1 PE=1 SV=2                                | P4HA1_HUMAN  | 61  | 1 | 0  | 2  | 1  |
| Myosin phosphatase Rho-interacting protein OS=Homo sapiens GN=MPRIIP PE=1 SV=3                         | MPRIIP_HUMAN | 117 | 0 | 4  | 0  | 5  |
| DnaJ homolog subfamily A member 1 OS=Homo sapiens GN=DNAJA1 PE=1 SV=2                                  | DNJA1_HUMAN  | 45  | 0 | 0  | 1  | 1  |
| Desmoplakin OS=Homo sapiens GN=DSP PE=1 SV=3                                                           | DESP_HUMAN   | 332 | 0 | 3  | 2  | 7  |

# Remsing Rix et al, Table S4

| Sample     | Protein name                                                                                                                                      | Protein accession | ni         | molecular weight (Da) | probability | unique peptides | unique spectra | total spectra | sequence coverage |
|------------|---------------------------------------------------------------------------------------------------------------------------------------------------|-------------------|------------|-----------------------|-------------|-----------------|----------------|---------------|-------------------|
| c(-)-Tiva1 | Anterior gradient protein 2 homolog OS=Homo sapiens GN=AGR2 PE=1 SV=1                                                                             | AGR2_HUMAN        | 19,980.30  | 20.00%                | 0           | 0               | 0              | 0.00%         |                   |
| c(-)-Tiva1 | Aspartyl/asparaginyl beta-hydroxylase OS=Homo sapiens GN=ASPH PE=1 SV=3                                                                           | ASPH_HUMAN        | 85,862.60  | 100.00%               | 6           | 6               | 6              | 13.70%        |                   |
| c(-)-Tiva1 | Ras GTPase-activating-like protein IQGAP1 OS=Homo sapiens GN=IQGAP1 PE=1 SV=1                                                                     | IQGAP1_HUMAN      | 189,258.60 | 100.00%               | 18          | 18              | 18             | 17.30%        |                   |
| c(-)-Tiva1 | Alpha-actinin-4 OS=Homo sapiens GN=ACTN4 PE=1 SV=2                                                                                                | ACTN4_HUMAN       | 104,857.20 | 100.00%               | 14          | 14              | 14             | 23.70%        |                   |
| c(-)-Tiva1 | Major vault protein OS=Homo sapiens GN=MVP PE=1 SV=4                                                                                              | MVP_HUMAN         | 99,326.00  | 100.00%               | 2           | 2               | 2              | 3.36%         |                   |
| c(-)-Tiva1 | Microtubule-actin cross-linking factor 1, isoforms 1/2/3/5 OS=Homo sapiens GN=MACF1 PE=1 SV=4                                                     | MACF1_HUMAN       | 838,314.20 | 59.80%                | 1           | 1               | 1              | 0.11%         |                   |
| c(-)-Tiva1 | Protein disulfide-isomerase A6 OS=Homo sapiens GN=PDIA6 PE=1 SV=1                                                                                 | PDIA6_HUMAN       | 48,122.30  | 100.00%               | 5           | 5               | 5              | 15.90%        |                   |
| c(-)-Tiva1 | Putative 60S ribosomal protein L13a-like MGC87657 OS=Homo sapiens PE=5 SV=1                                                                       | R13A_X_HUMAN      | 12,135.00  | 60.70%                | 1           | 1               | 1              | 10.80%        |                   |
| c(-)-Tiva1 | Coatomer subunit beta' OS=Homo sapiens GN=COBP2 PE=1 SV=2                                                                                         | COBP2_HUMAN       | 102,489.10 | 100.00%               | 5           | 5               | 6              | 8.61%         |                   |
| c(-)-Tiva1 | Catenin beta-1 OS=Homo sapiens GN=CTNNB1 PE=1 SV=1                                                                                                | CTNNB1_HUMAN      | 85,497.00  | 56.30%                | 1           | 1               | 1              | 1.28%         |                   |
| c(-)-Tiva1 | F-actin-capping protein subunit alpha-2 OS=Homo sapiens GN=CAPZA2 PE=1 SV=3                                                                       | CAZA2_HUMAN       | 32,949.20  | 100.00%               | 3           | 3               | 3              | 19.60%        |                   |
| c(-)-Tiva1 | Nucleophosmin OS=Homo sapiens GN=NPM1 PE=1 SV=2                                                                                                   | NPM_HUMAN         | 32,575.50  | 100.00%               | 7           | 9               | 11             | 40.10%        |                   |
| c(-)-Tiva1 | Desmoplakin OS=Homo sapiens GN=DSP PE=1 SV=3                                                                                                      | DSF_HUMAN         | 331,781.40 | 80.70%                | 0           | 0               | 0              | 0.00%         |                   |
| c(-)-Tiva1 | Heat shock-related 70 kDa protein 2 OS=Homo sapiens GN=HSPA2 PE=1 SV=1                                                                            | HSP72_HUMAN       | 70,023.00  | 100.00%               | 2           | 2               | 2              | 4.07%         |                   |
| c(-)-Tiva1 | Importin-7 OS=Homo sapiens GN=IPO7 PE=1 SV=1                                                                                                      | IPO7_HUMAN        | 119,519.50 | 100.00%               | 2           | 2               | 2              | 2.31%         |                   |
| c(-)-Tiva1 | Elongation factor 1-gamma OS=Homo sapiens GN=EEF1G PE=1 SV=3                                                                                      | EF1G_HUMAN        | 50,118.40  | 85.00%                | 1           | 1               | 1              | 2.29%         |                   |
| c(-)-Tiva1 | Nucleoprotein TPR OS=Homo sapiens GN=TPR PE=1 SV=3                                                                                                | TPR_HUMAN         | 267,289.30 | 100.00%               | 11          | 11              | 12             | 7.83%         |                   |
| c(-)-Tiva1 | 60S ribosomal protein L7 OS=Homo sapiens GN=RPL7 PE=1 SV=1                                                                                        | RL7_HUMAN         | 29,227.70  | 94.80%                | 1           | 1               | 1              | 4.44%         |                   |
| c(-)-Tiva1 | Sperm-specific antigen 2 OS=Homo sapiens GN=SSFA2 PE=1 SV=3                                                                                       | SSFA2_HUMAN       | 138,386.10 | 99.30%                | 1           | 1               | 1              | 1.43%         |                   |
| c(-)-Tiva1 | AP-2 complex subunit beta OS=Homo sapiens GN=AP2B1 PE=1 SV=1                                                                                      | AP2B1_HUMAN       | 104,555.30 | 76.10%                | 1           | 1               | 1              | 1.17%         |                   |
| c(-)-Tiva1 | ADP-ribosylation factor-like protein 1 OS=Homo sapiens GN=ARL1 PE=1 SV=1                                                                          | ARL1_HUMAN        | 20,418.20  | 84.50%                | 1           | 1               | 1              | 6.08%         |                   |
| c(-)-Tiva1 | Protein flightless-1 homolog OS=Homo sapiens GN=FLII PE=1 SV=1                                                                                    | FLII_HUMAN        | 144,755.40 | 100.00%               | 16          | 16              | 17             | 18.40%        |                   |
| c(-)-Tiva1 | Galectin-3-binding protein OS=Homo sapiens GN=LGALS3BP PE=1 SV=1                                                                                  | LG3BP_HUMAN       | 65,332.10  | 100.00%               | 7           | 7               | 7              | 16.60%        |                   |
| c(-)-Tiva1 | F-actin-capping protein subunit beta OS=Homo sapiens GN=CAPZB PE=1 SV=4                                                                           | CAPZB_HUMAN       | 31,351.60  | 100.00%               | 8           | 9               | 9              | 36.80%        |                   |
| c(-)-Tiva1 | Heterogeneous nuclear ribonucleoprotein L OS=Homo sapiens GN=HNRNPL PE=1 SV=2                                                                     | HNRPL_HUMAN       | 64,133.80  | 100.00%               | 1           | 1               | 1              | 2.21%         |                   |
| c(-)-Tiva1 | Catenin alpha-1 OS=Homo sapiens GN=CTNNA1 PE=1 SV=1                                                                                               | CTNA1_HUMAN       | 100,072.90 | 77.00%                | 1           | 1               | 1              | 1.43%         |                   |
| c(-)-Tiva1 | Peptidyl-prolyl cis-trans isomerase B OS=Homo sapiens GN=PP1B PE=1 SV=2                                                                           | PP1B_HUMAN        | 23,743.20  | 100.00%               | 3           | 3               | 3              | 16.20%        |                   |
| c(-)-Tiva1 | Spectrin beta chain, non-erythrocytic 1 OS=Homo sapiens GN=SPTBN1 PE=1 SV=2                                                                       | SPTB2_HUMAN       | 274,613.40 | 100.00%               | 146         | 218             | 256            | 61.94%        |                   |
| c(-)-Tiva1 | E3 SUMO-protein ligase RanBP2 OS=Homo sapiens GN=RANBP2 PE=1 SV=2                                                                                 | RBP2_HUMAN        | 358,198.20 | 100.00%               | 6           | 6               | 6              | 2.64%         |                   |
| c(-)-Tiva1 | Myofelin OS=Homo sapiens GN=MYOF PE=1 SV=1                                                                                                        | MYOF_HUMAN        | 234,715.60 | 97.60%                | 1           | 1               | 1              | 0.63%         |                   |
| c(-)-Tiva1 | 40S ribosomal protein S3 OS=Homo sapiens GN=RPS3 PE=1 SV=2                                                                                        | RS3_HUMAN         | 26,688.60  | 100.00%               | 4           | 4               | 4              | 23.00%        |                   |
| c(-)-Tiva1 | Heat shock 70 kDa protein 1-like OS=Homo sapiens GN=HSPA1L PE=1 SV=2                                                                              | HSP71_HUMAN       | 70,377.10  | 100.00%               | 5           | 5               | 5              | 10.70%        |                   |
| c(-)-Tiva1 | AP-2 complex subunit alpha-1 OS=Homo sapiens GN=AP2A1 PE=1 SV=3                                                                                   | AP2A1_HUMAN       | 107,548.70 | 100.00%               | 3           | 3               | 4              | 3.79%         |                   |
| c(-)-Tiva1 | Collagen alpha 1(VII) chain OS=Homo sapiens GN=COL7A1 PE=1 SV=2                                                                                   | COTA1_HUMAN       | 295,217.50 | 100.00%               | 1           | 1               | 1              | 0.71%         |                   |
| c(-)-Tiva1 | Mucin-1 OS=Homo sapiens GN=MUC1 PE=1 SV=3                                                                                                         | MUC1_HUMAN        | 122,098.60 | 95.00%                | 1           | 1               | 1              | 0.88%         |                   |
| c(-)-Tiva1 | Methionine-tRNA ligase, cytoplasmic OS=Homo sapiens GN=MARS PE=1 SV=2                                                                             | SMC_HUMAN         | 101,117.50 | 100.00%               | 3           | 3               | 4              | 5.33%         |                   |
| c(-)-Tiva1 | Myosin light chain 6B OS=Homo sapiens GN=MYL6B PE=1 SV=1                                                                                          | MYL6B_HUMAN       | 22,764.10  | 100.00%               | 2           | 2               | 2              | 11.50%        |                   |
| c(-)-Tiva1 | ATP synthase subunit alpha, mitochondrial OS=Homo sapiens GN=ATP5A1 PE=1 SV=1                                                                     | ATPA_HUMAN        | 59,752.10  | 100.00%               | 7           | 7               | 8              | 20.30%        |                   |
| c(-)-Tiva1 | Heat shock cognate 71 kDa protein OS=Homo sapiens GN=HSPA8 PE=1 SV=1                                                                              | HSP7C_HUMAN       | 70,899.80  | 100.00%               | 8           | 9               | 9              | 19.00%        |                   |
| c(-)-Tiva1 | Leucine-rich repeat flightless-interacting protein 1 OS=Homo sapiens GN=LRRFIP1 PE=1 SV=2                                                         | LRRF1_HUMAN       | 89,252.60  | 100.00%               | 2           | 2               | 2              | 3.71%         |                   |
| c(-)-Tiva1 | Coronin-1C OS=Homo sapiens GN=CORO1C PE=1 SV=1                                                                                                    | COR1C_HUMAN       | 53,250.30  | 100.00%               | 20          | 27              | 30             | 49.20%        |                   |
| c(-)-Tiva1 | Actin-binding LIM protein 1 OS=Homo sapiens GN=ABLIM1 PE=1 SV=3                                                                                   | ABLM1_HUMAN       | 87,688.00  | 100.00%               | 2           | 2               | 2              | 5.27%         |                   |
| c(-)-Tiva1 | Heterogeneous nuclear ribonucleoprotein M OS=Homo sapiens GN=HNRNPM1 PE=1 SV=4                                                                    | HNRM1_HUMAN       | 49,229.80  | 100.00%               | 5           | 7               | 9              | 17.80%        |                   |
| c(-)-Tiva1 | Peroxiredoxin-4 OS=Homo sapiens GN=PRDX4 PE=1 SV=1                                                                                                | PRDX4_HUMAN       | 30,541.10  | 100.00%               | 2           | 2               | 2              | 16.20%        |                   |
| c(-)-Tiva1 | Nuclear pore complex protein Nup93 OS=Homo sapiens GN=NUP93 PE=1 SV=2                                                                             | NUP93_HUMAN       | 93,491.20  | 100.00%               | 2           | 2               | 2              | 4.03%         |                   |
| c(-)-Tiva1 | Transmembrane 9 superfamily member 4 OS=Homo sapiens GN=TM9SF4 PE=1 SV=2                                                                          | TM9S4_HUMAN       | 74,521.30  | 14.90%                | 0           | 0               | 0              | 0.00%         |                   |
| c(-)-Tiva1 | sp Q13813 SPTA2_HUMAN Spectrin alpha chain, brain OS=Homo sapiens GN=SPTAN1 PE=1 SV=1                                                             | SPTA2_HUMAN       | 0          | 100.00%               | 186         | 265             | 290            | 0.00%         |                   |
| c(-)-Tiva1 | Acyl-CoA dehydrogenase family member 9, mitochondrial OS=Homo sapiens GN=ACAD9 PE=1 SV=1                                                          | ACAD9_HUMAN       | 68,762.80  | 97.20%                | 0           | 0               | 0              | 0.00%         |                   |
| c(-)-Tiva1 | Dihydrolipoylysine-residue acetyltransferase component of pyruvate dehydrogenase complex, mitochondrial OS=Homo sapiens GN=PDH11 PE=1 SV=1        | ODP2_HUMAN        | 68,987.20  | 99.80%                | 1           | 1               | 1              | 2.32%         |                   |
| c(-)-Tiva1 | Nuclear pore complex protein NUP155 OS=Homo sapiens GN=NUP155 PE=1 SV=1                                                                           | NUP155_HUMAN      | 155,203.00 | 100.00%               | 5           | 5               | 5              | 4.74%         |                   |
| c(-)-Tiva1 | Heterogeneous nuclear ribonucleoprotein K OS=Homo sapiens GN=HNRNPK PE=1 SV=1                                                                     | HNRPK_HUMAN       | 50,978.50  | 100.00%               | 2           | 2               | 2              | 6.70%         |                   |
| c(-)-Tiva1 | Heterogeneous nuclear ribonucleoprotein L OS=Homo sapiens GN=HNRNPL PE=1 SV=1                                                                     | HNRPL_HUMAN       | 90,585.20  | 100.00%               | 8           | 8               | 10             | 14.40%        |                   |
| c(-)-Tiva1 | Spectrin beta chain, erythrocytic OS=Homo sapiens GN=SPTB PE=1 SV=5                                                                               | SPTB1_HUMAN       | 24,647.60  | 100.00%               | 3           | 10              | 10             | 1.82%         |                   |
| c(-)-Tiva1 | Keratin, type I cytoskeletal 14 OS=Homo sapiens GN=KRT14 PE=1 SV=4                                                                                | K1C1A_HUMAN       | 51,562.50  | 100.00%               | 3           | 3               | 3              | 7.84%         |                   |
| c(-)-Tiva1 | Ras-related protein Rab-10 OS=Homo sapiens GN=RAB10 PE=1 SV=1                                                                                     | RAB10_HUMAN       | 22,545.10  | 85.30%                | 0           | 0               | 0              | 0.00%         |                   |
| c(-)-Tiva1 | Unconventional myosin-Ib OS=Homo sapiens GN=MYO1B PE=1 SV=3                                                                                       | MYO1B_HUMAN       | 131,998.00 | 100.00%               | 26          | 30              | 30             | 27.40%        |                   |
| c(-)-Tiva1 | Pleckstrin homology domain-containing family G member 3 OS=Homo sapiens GN=PLEKHG3 PE=1 SV=1                                                      | PHKG3_HUMAN       | 134,413.00 | 100.00%               | 3           | 3               | 3              | 4.02%         |                   |
| c(-)-Tiva1 | Coatomer subunit delta OS=Homo sapiens GN=ARCN1 PE=1 SV=1                                                                                         | COPD_HUMAN        | 57,211.20  | 95.00%                | 1           | 1               | 1              | 2.35%         |                   |
| c(-)-Tiva1 | Tropomyosin alpha-1 chain OS=Homo sapiens GN=TPM1 PE=1 SV=2                                                                                       | TPM1_HUMAN        | 32,710.00  | 100.00%               | 3           | 4               | 4              | 12.30%        |                   |
| c(-)-Tiva1 | Mediator of RNA polymerase II transcription subunit 13 OS=Homo sapiens GN=MED13 PE=1 SV=3                                                         | MED13_HUMAN       | 239,297.70 | 74.50%                | 1           | 1               | 1              | 0.78%         |                   |
| c(-)-Tiva1 | 26S proteasome non-ATPase regulatory subunit 1 OS=Homo sapiens GN=PSMD1 PE=1 SV=2                                                                 | PSMD1_HUMAN       | 105,839.20 | 100.00%               | 2           | 2               | 2              | 3.15%         |                   |
| c(-)-Tiva1 | Calnexin OS=Homo sapiens GN=CANX PE=1 SV=2                                                                                                        | CALK_HUMAN        | 42,570.20  | 95.50%                | 1           | 1               | 1              | 1.69%         |                   |
| c(-)-Tiva1 | Glucagon synthase kinase-3 alpha OS=Homo sapiens GN=GSK3A PE=1 SV=2                                                                               | GSK3A_HUMAN       | 50,981.90  | 100.00%               | 7           | 8               | 8              | 21.70%        |                   |
| c(-)-Tiva1 | Pre-mRNA processing factor 19 OS=Homo sapiens GN=PRPF19 PE=1 SV=2                                                                                 | PRP19_HUMAN       | 55,181.30  | 99.80%                | 1           | 1               | 1              | 6.30%         |                   |
| c(-)-Tiva1 | Trifunctional enzyme subunit alpha, mitochondrial OS=Homo sapiens GN=HADHA PE=1 SV=2                                                              | ECHA_HUMAN        | 83,001.90  | 100.00%               | 6           | 6               | 6              | 10.40%        |                   |
| c(-)-Tiva1 | Dihydrolipoylysine-residue succinyltransferase component of 2-oxoglutarate dehydrogenase complex, mitochondrial OS=Homo sapiens GN=PDH2 PE=1 SV=1 | ODO2_HUMAN        | 48,755.20  | 99.90%                | 1           | 1               | 1              | 2.65%         |                   |
| c(-)-Tiva1 | Tropomodulin-3 OS=Homo sapiens GN=TMOD3 PE=1 SV=1                                                                                                 | TMOD3_HUMAN       | 39,596.10  | 100.00%               | 7           | 7               | 8              | 29.50%        |                   |
| c(-)-Tiva1 | Guanine nucleotide-binding protein (G) subunit alpha OS=Homo sapiens GN=GNAI3 PE=1 SV=3                                                           | GNAI3_HUMAN       | 40,533.50  | 79.20%                | 1           | 1               | 1              | 4.24%         |                   |
| c(-)-Tiva1 | Transcription intermediary factor 1-beta OS=Homo sapiens GN=TRIM28 PE=1 SV=5                                                                      | TIF1B_HUMAN       | 88,549.00  | 100.00%               | 2           | 2               | 2              | 4.79%         |                   |
| c(-)-Tiva1 | Transportin-1 OS=Homo sapiens GN=TNPO1 PE=1 SV=2                                                                                                  | TNPO1_HUMAN       | 102,358.80 | 93.30%                | 1           | 1               | 1              | 1.34%         |                   |
| c(-)-Tiva1 | Rab11 family-interacting protein 1 OS=Homo sapiens GN=RAB11FIP1 PE=1 SV=2                                                                         | RFP11_HUMAN       | 137,197.60 | 95.00%                | 1           | 1               | 1              | 0.94%         |                   |
| c(-)-Tiva1 | 26S protease regulatory subunit 8 OS=Homo sapiens GN=PSMCS PE=1 SV=1                                                                              | PRSS_HUMAN        | 45,627.20  | 100.00%               | 1           | 1               | 1              | 2.71%         |                   |
| c(-)-Tiva1 | Spectrin alpha chain, erythrocytic OS=Homo sapiens GN=SPTA1 PE=1 SV=5                                                                             | SPTA1_HUMAN       | 280,019.00 | 99.90%                | 1           | 1               | 1              | 0.50%         |                   |
| c(-)-Tiva1 | Spectrin alpha chain, erythrocytic OS=Homo sapiens GN=SPTA1 PE=1 SV=5                                                                             | SVIL_HUMAN        | 247,747.10 | 100.00%               | 39          | 40              | 41             | 29.30%        |                   |
| c(-)-Tiva1 | Glucosylase 2 subunit beta OS=Homo sapiens GN=PRKCSH PE=1 SV=2                                                                                    | GLU2B_HUMAN       | 59,425.80  | 100.00%               | 2           | 2               | 2              | 4.36%         |                   |
| c(-)-Tiva1 | F-actin-capping protein subunit alpha-1 OS=Homo sapiens GN=CAPZA1 PE=1 SV=3                                                                       | CAZA1_HUMAN       | 32,923.20  | 100.00%               | 4           | 4               | 5              | 24.10%        |                   |
| c(-)-Tiva1 | Unconventional myosin-Ia OS=Homo sapiens GN=MYO1A PE=1 SV=1                                                                                       | MYO1A_HUMAN       | 118,404.40 | 100.00%               | 3           | 3               | 3              | 3.64%         |                   |
| c(-)-Tiva1 | SH3 domain-binding glutamic acid-rich-like protein 2 OS=Homo sapiens GN=SH3BGR12 PE=1 SV=2                                                        | SHL3_HUMAN        | 12,326.30  | 100.00%               | 2           | 2               | 2              | 24.30%        |                   |
| c(-)-Tiva1 | 6-phosphogluconate dehydrogenase, decarboxylating OS=Homo sapiens GN=PGD PE=1 SV=3                                                                | 6PGD_HUMAN        | 53,141.90  | 100.00%               | 2           | 2               | 2              | 5.80%         |                   |
| c(-)-Tiva1 | Redox-regulatory protein FAM213A OS=Homo sapiens GN=FAM213A PE=1 SV=3                                                                             | F213A_HUMAN       | 25,765.50  | 53.90%                | 1           | 1               | 1              | 6.55%         |                   |
| c(-)-Tiva1 | Tuftsin-interacting protein 11 OS=Homo sapiens GN=TFIP11 PE=1 SV=1                                                                                | TFP11_HUMAN       | 96,821.90  | 59.40%                | 1           | 1               | 1              | 3.70%         |                   |
| c(-)-Tiva1 | Small nuclear ribonucleoprotein Sm D3 OS=Homo sapiens GN=SNRPD3 PE=1 SV=1                                                                         | SMD3_HUMAN        | 13,916.60  | 100.00%               | 2           | 2               | 2              | 24.60%        |                   |
| c(-)-Tiva1 | Serine/threonine-protein phosphatase PP1-alpha catalytic subunit OS=Homo sapiens GN=PPP1CA PE=1 SV=1                                              | PP1A_HUMAN        | 37,513.90  | 48.70%                | 1           | 1               | 1              | 2.73%         |                   |
| c(-)-Tiva1 | Interleukin enhancer-binding factor 3 OS=Homo sapiens GN=ILF3 PE=1 SV=3                                                                           | ILF3_HUMAN        | 95,338.90  | 100.00%               | 3           | 3               | 3              | 4.78%         |                   |
| c(-)-Tiva1 | Dolichyl-diphosphooligosaccharide-protein glycosyltransferase subunit 1 OS=Homo sapiens GN=RPNI1 PE=1 SV=1                                        | RPNI1_HUMAN       | 68,571.00  | 100.00%               | 2           | 2               | 2              | 4.78%         |                   |
| c(-)-Tiva1 | Solute carrier family 2, facilitated glucose transporter member 1 OS=Homo sapiens GN=SLC2A1 PE=1 SV=2                                             | GTR1_HUMAN        | 54,085.30  | 100.00%               | 1           | 1               | 1              | 2.03%         |                   |
| c(-)-Tiva1 | Twinfilin-1 OS=Homo sapiens GN=TWIF1 PE=1 SV=3                                                                                                    | TWIF1_HUMAN       | 40,284.20  | 100.00%               | 4           | 4               | 4              | 19.10%        |                   |
| c(-)-Tiva1 | Pre-mRNA branch site protein p14 OS=Homo sapiens GN=SF3B14 PE=1 SV=1                                                                              | PM14_HUMAN        | 14,585.60  | 88.40%                | 1           | 1               | 1              | 11.20%        |                   |
| c(-)-Tiva1 | 26S proteasome non-ATPase regulatory subunit 12 OS=Homo sapiens GN=PSMD12 PE=1 SV=3                                                               | PSD12_HUMAN       | 52,906.20  | 92.90%                | 1           | 1               | 1              | 2.85%         |                   |
| c(-)-Tiva1 | Putative ribosomal RNA methyltransferase NOP2 OS=Homo sapiens GN=NOP2 PE=1 SV=2                                                                   | NOP2_HUMAN        | 89,303.60  | 95.00%                | 1           | 1               | 1              | 1.72%         |                   |
| c(-)-Tiva1 | Putative beta-actin-like protein 3 OS=Homo sapiens GN=POTEK PE=5 SV=1                                                                             | ACTB_M_HUMAN      | 42,017.20  | 100.00%               | 2           | 4               | 6              | 6.40%         |                   |
| c(-)-Tiva1 | Annexin A2 OS=Homo sapiens GN=ANXA2 PE=1 SV=2                                                                                                     | ANXA2_HUMAN       | 38,606.10  | 100.00%               | 6           | 6               | 6              | 25.40%        |                   |
| c(-)-Tiva1 | Cathepsin D OS=Homo sapiens GN=CTSD PE=1 SV=1                                                                                                     | CATD_HUMAN        | 44,553.00  | 100.00%               | 2           | 2               | 2              | 7.04%         |                   |
| c(-)-Tiva1 | Lactate dehydrogenase A chain OS=Homo sapiens GN=LDHA PE=1 SV=2                                                                                   | LDHA_HUMAN        | 36,689.20  | 83.00%                | 1           | 1               | 1              | 3.01%         |                   |
| c(-)-Tiva1 | POTE ankryrin domain family member E OS=Homo sapiens GN=POTEE PE=1 SV=3                                                                           | POTEE_HUMAN       | 121,366.20 | 95.00%                | 1           | 1               | 1              | 2.60%         |                   |
| c(-)-Tiva1 | Protein FAM83H OS=Homo sapiens GN=FAM83H PE=1 SV=3                                                                                                | FA83H_HUMAN       | 127,123.90 | 99.40%                | 1           | 1               | 1              | 1.78%         |                   |
| c(-)-Tiva1 | Importin-5 OS=Homo sapiens GN=IP05 PE=1 SV=4                                                                                                      | IPOS_HUMAN        | 123,632.20 | 48.10%                | 1           | 1               | 1              | 1.28%         |                   |
| c(-)-Tiva1 | DnaI homolog subfamily C member 10 OS=Homo sapiens GN=DNAIC10 PE=1 SV=2                                                                           | DC10_HUMAN        | 91,082.40  | 100.00%               | 7           | 7               | 7              | 10.80%        |                   |
| c(-)-Tiva1 | Kinectin OS=Homo sapiens GN=KTNI1 PE=1 SV=1                                                                                                       | KTNI1_HUMAN       | 156,276.30 | 100.00%               | 2           | 2               | 2              | 1.84%         |                   |
| c(-)-Tiva1 | Putative heat shock protein HSP 90-beta-3 OS=Homo sapiens GN=HSP90AB3P PE=5 SV=1                                                                  | H90B3_HUMAN       | 68,326.50  | 100.00%               | 3           | 3               | 3              | 6.37%         |                   |
| c(-)-Tiva1 | Adseverin OS=Homo sapiens GN=SCIN PE=1 SV=4                                                                                                       | ADSV_HUMAN        | 80,490.20  | 100.00%               | 4           | 4               | 4              | 7.97%         |                   |
| c(-)-Tiva1 | Bifunctional glutamate/proline-tRNA ligase OS=Homo sapiens GN=EPRS PE=1 SV=5                                                                      | SYEP_HUMAN        | 170,593.20 | 78.70%                | 1           | 1               | 1              | 0.79%         |                   |
| c(-)-Tiva1 | 60S ribosomal protein L5 OS=Homo sapiens GN=RPL5 PE=1 SV=3                                                                                        | RL5_HUMAN         | 34,363.50  | 90.30%                | 1           | 1               | 1              | 0.60%         |                   |
| c(-)-Tiva1 | Neuroblast differentiation-associated protein AHNAK OS=Homo sapiens GN=AHNAK PE=1 SV=2                                                            | AHNK_HUMAN        | 629,104.40 | 100.00%               | 6           | 6               | 6              | 1.56%         |                   |
| c(-)-Tiva1 | Thioredoxin-dependent peroxide reductase, mitochondrial OS=Homo sapiens GN=PRDX3 PE=1 SV=3                                                        | PRDX3_HUMAN       | 27,692.70  | 100.00%               | 4           | 4               | 5              | 26.60%        |                   |
| c(-)-Tiva1 | Unconventional myosin-Vc OS=Homo sapiens GN=MYOSC PE=1 SV=2                                                                                       | MYOSC_HUMAN       | 202,816.50 | 100.00%               | 7           | 7               | 7              | 5.91%         |                   |
| c(-)-Tiva1 | 60S ribosomal protein L11 OS=Homo sapiens GN=RPL11 PE=1 SV=2                                                                                      | RL11_HUMAN        | 20,253.20  | 95.00%                | 1           | 1               | 1              | 7.87%         |                   |
| c(-)-Tiva1 | Stress-70 protein, mitochondrial OS=Homo sapiens GN=HSPA9 PE=1 SV=2                                                                               | GRP75_HUMAN       | 73,681.30  | 100.00%               | 2           | 2               | 2              | 4.57%         |                   |
| c(-)-Tiva1 | Erlin-1 OS=Homo sapiens GN=ERLIN1 PE=1 SV=1                                                                                                       | ERLN1_HUMAN       | 38,926.70  | 100.00%               | 2           | 2               | 2              | 6.94%         |                   |
| c(-)-Tiva1 | Coronin-2A OS=Homo sapiens GN=CORO2A PE=2 SV=2                                                                                                    | COR2A_HUMAN       | 59,764.70  | 100.00%               | 8           | 9               | 11             | 17.50%        |                   |
| c(-)-Tiva1 | Isocitrate dehydrogenase [NAD] subunit alpha, mitochondrial OS=Homo sapiens GN=IDH3A PE=1 SV=1                                                    | IDH3A_HUMAN       | 39,592.50  | 64.00%                | 1           | 1               | 1              | 6.28%         |                   |

|            |                                                                                                    |              |            |         |     |     |     |        |
|------------|----------------------------------------------------------------------------------------------------|--------------|------------|---------|-----|-----|-----|--------|
| c(-)-Tiva1 | U5 small nuclear ribonucleoprotein 200 kDa helicase OS=Homo sapiens GN=SNRNP200 PE=1 SV=2          | U520_HUMAN   | 244,513.80 | 100.00% | 6   | 6   | 6   | 3.60%  |
| c(-)-Tiva1 | 10 kDa heat shock protein, mitochondrial OS=Homo sapiens GN=HSP61 PE=1 SV=2                        | CH10_HUMAN   | 10,931.80  | 100.00% | 2   | 2   | 2   | 25.50% |
| c(-)-Tiva1 | Keratin, type I cytoskeletal 13 OS=Homo sapiens GN=KRT13 PE=1 SV=4                                 | K1C13_HUMAN  | 49,589.30  | 100.00% | 3   | 3   | 3   | 8.08%  |
| c(-)-Tiva1 | Actin-related protein 2/3 complex subunit 1B OS=Homo sapiens GN=ARPC1B PE=1 SV=3                   | ARC1B_HUMAN  | 40,949.80  | 100.00% | 2   | 2   | 2   | 9.95%  |
| c(-)-Tiva1 | Very long-chain specific acyl-CoA dehydrogenase, mitochondrial OS=Homo sapiens GN=ACADVL PE=1 SV=1 | ACADV_HUMAN  | 70,391.60  | 95.00%  | 1   | 1   | 1   | 1.83%  |
| c(-)-Tiva1 | Plectin OS=Homo sapiens GN=PLEC PE=1 SV=3                                                          | PLEC_HUMAN   | 531,783.90 | 100.00% | 171 | 200 | 208 | 42.40% |
| c(-)-Tiva1 | Endoplasmic OS=Homo sapiens GN=HSP90B1 PE=1 SV=1                                                   | ENPL_HUMAN   | 92,471.70  | 100.00% | 15  | 16  | 18  | 31.30% |
| c(-)-Tiva1 | Heat shock protein beta-1 OS=Homo sapiens GN=HSPB1 PE=1 SV=2                                       | HSPB1_HUMAN  | 22,782.60  | 34.30%  | 0   | 0   | 0   | 0.00%  |
| c(-)-Tiva1 | Phosphoenolpyruvate carboxykinase [GTP], mitochondrial OS=Homo sapiens GN=PCK2 PE=1 SV=3           | PCKG_M_HUMAN | 70,730.90  | 100.00% | 2   | 2   | 2   | 5.31%  |
| c(-)-Tiva1 | Putative heat shock protein HSP 90-beta 2 OS=Homo sapiens GN=HSP90AB2P PE=1 SV=2                   | H90B2_HUMAN  | 44,350.20  | 85.30%  | 1   | 1   | 1   | 2.36%  |
| c(-)-Tiva1 | Heterogeneous nuclear ribonucleoproteins A2/B1 OS=Homo sapiens GN=HNRNPA2B1 PE=1 SV=2              | ROA2_HUMAN   | 37,430.30  | 99.90%  | 2   | 2   | 3   | 8.50%  |
| c(-)-Tiva1 | Heat shock protein HSP 90-alpha OS=Homo sapiens GN=HSP90AA1 PE=1 SV=5                              | HS90A_HUMAN  | 84,663.20  | 100.00% | 1   | 1   | 1   | 2.05%  |
| c(-)-Tiva1 | Keratin, type II cytoskeletal 79 OS=Homo sapiens GN=KRT79 PE=1 SV=2                                | K2C79_HUMAN  | 57,836.00  | 34.40%  | 0   | 0   | 0   | 0.00%  |
| c(-)-Tiva1 | Elongation factor 1-alpha 1 OS=Homo sapiens GN=EEF1A1 PE=1 SV=1                                    | EF1A1_HUMAN  | 50,141.20  | 100.00% | 4   | 4   | 4   | 12.80% |
| c(-)-Tiva1 | 40S ribosomal protein S28 OS=Homo sapiens GN=RPS28 PE=1 SV=1                                       | RS28_HUMAN   | 7,840.90   | 95.00%  | 1   | 1   | 1   | 17.40% |
| c(-)-Tiva1 | Aconitate hydratase, mitochondrial OS=Homo sapiens GN=ACO2 PE=1 SV=2                               | ACON_HUMAN   | 85,428.00  | 99.80%  | 1   | 1   | 1   | 1.67%  |
| c(-)-Tiva1 | 26S protease regulatory subunit 7 OS=Homo sapiens GN=PSMC2 PE=1 SV=3                               | PR57_HUMAN   | 48,635.60  | 100.00% | 2   | 2   | 2   | 7.39%  |
| c(-)-Tiva1 | Coiled-coil domain-containing protein 91 OS=Homo sapiens GN=CCDC91 PE=1 SV=2                       | CCD91_HUMAN  | 49,971.80  | 58.30%  | 1   | 1   | 1   | 2.72%  |
| c(-)-Tiva1 | Matrin-3 OS=Homo sapiens GN=MATR3 PE=1 SV=2                                                        | MATR3_HUMAN  | 94,626.70  | 100.00% | 2   | 2   | 2   | 4.25%  |
| c(-)-Tiva1 | Unconventional myosin-XVIIa OS=Homo sapiens GN=MYO18A PE=1 SV=3                                    | MY18A_HUMAN  | 233,119.80 | 100.00% | 25  | 26  | 27  | 19.40% |
| c(-)-Tiva1 | RuvB-like 2 OS=Homo sapiens GN=RUVBL2 PE=1 SV=3                                                    | RUVB2_HUMAN  | 51,158.10  | 100.00% | 4   | 4   | 4   | 10.80% |
| c(-)-Tiva1 | Keratin, type II cytoskeletal 4 OS=Homo sapiens GN=KRT4 PE=1 SV=4                                  | K2C4_HUMAN   | 57,286.10  | 100.00% | 12  | 15  | 16  | 32.20% |
| c(-)-Tiva1 | Histone deacetylase 6 OS=Homo sapiens GN=HDAC6 PE=1 SV=2                                           | HDAC6_HUMAN  | 131,418.70 | 100.00% | 11  | 13  | 14  | 20.40% |
| c(-)-Tiva1 | Myosin light chain 1/3, skeletal muscle isoform OS=Homo sapiens GN=MYL1 PE=1 SV=3                  | MYL1_HUMAN   | 21,145.60  | 95.00%  | 1   | 1   | 1   | 8.25%  |
| c(-)-Tiva1 | Protein transport protein Sec16A OS=Homo sapiens GN=SEC16A PE=1 SV=3                               | SC16A_HUMAN  | 233,515.30 | 95.00%  | 1   | 1   | 1   | 0.55%  |
| c(-)-Tiva1 | Caveolin-1 OS=Homo sapiens GN=CAV1 PE=1 SV=4                                                       | CAV1_HUMAN   | 20,472.20  | 100.00% | 2   | 2   | 2   | 25.80% |
| c(-)-Tiva1 | Actin-related protein 2/3 complex subunit 1A OS=Homo sapiens GN=ARPC1A PE=1 SV=2                   | ARC1A_HUMAN  | 41,569.20  | 100.00% | 2   | 2   | 2   | 7.03%  |
| c(-)-Tiva1 | Coproporphyrinogen-III oxidase, mitochondrial OS=Homo sapiens GN=CPOX PE=1 SV=3                    | HEM6_HUMAN   | 50,152.00  | 9.00%   | 0   | 0   | 0   | 0.00%  |
| c(-)-Tiva1 | Alpha-actinin-1 OS=Homo sapiens GN=ACTN1 PE=1 SV=2                                                 | ACTN1_HUMAN  | 103,061.10 | 100.00% | 6   | 6   | 6   | 9.53%  |
| c(-)-Tiva1 | Actin-related protein 2/3 complex subunit 2 OS=Homo sapiens GN=ARPC2 PE=1 SV=1                     | ARPC2_HUMAN  | 34,333.70  | 100.00% | 5   | 5   | 5   | 15.30% |
| c(-)-Tiva1 | Prohibitin OS=Homo sapiens GN=PHB PE=1 SV=1                                                        | PHB_HUMAN    | 29,804.60  | 92.20%  | 1   | 1   | 1   | 3.68%  |
| c(-)-Tiva1 | DnaJ homolog subfamily B member 11 OS=Homo sapiens GN=DNAJB11 PE=1 SV=1                            | DJB11_HUMAN  | 40,514.60  | 95.00%  | 1   | 1   | 1   | 4.47%  |
| c(-)-Tiva1 | Histone deacetylase 1 OS=Homo sapiens GN=HDAC1 PE=1 SV=1                                           | HDAC1_HUMAN  | 55,104.10  | 95.00%  | 1   | 1   | 1   | 2.49%  |
| c(-)-Tiva1 | Aldehyde dehydrogenase, mitochondrial OS=Homo sapiens GN=ALDH2 PE=1 SV=2                           | ALDH2_HUMAN  | 56,381.40  | 49.40%  | 1   | 1   | 1   | 2.71%  |
| c(-)-Tiva1 | Creatine kinase U-type, mitochondrial OS=Homo sapiens GN=CKMT1A PE=1 SV=1                          | KCRU_HUMAN   | 47,038.00  | 95.00%  | 1   | 1   | 1   | 5.04%  |
| c(-)-Tiva1 | Aldo-keto reductase family 1 member B10 OS=Homo sapiens GN=AKR1B10 PE=1 SV=2                       | AK1B1A_HUMAN | 36,020.40  | 28.50%  | 0   | 0   | 0   | 0.00%  |
| c(-)-Tiva1 | Surfeit locus protein 4 OS=Homo sapiens GN=SURF4 PE=1 SV=3                                         | SURF4_HUMAN  | 30,395.40  | 95.00%  | 1   | 1   | 1   | 4.83%  |
| c(-)-Tiva1 | ADP-ribosylation factor 1 OS=Homo sapiens GN=ARF1 PE=1 SV=2                                        | ARF1_HUMAN   | 20,697.60  | 95.00%  | 1   | 1   | 1   | 6.08%  |
| c(-)-Tiva1 | Glypican-1 OS=Homo sapiens GN=GPC1 PE=1 SV=2                                                       | GPC1_HUMAN   | 61,681.30  | 100.00% | 1   | 1   | 1   | 3.41%  |
| c(-)-Tiva1 | Neurabin-1 OS=Homo sapiens GN=PPP1R9A PE=1 SV=2                                                    | NEB1_HUMAN   | 123,343.60 | 93.60%  | 0   | 0   | 0   | 0.00%  |
| c(-)-Tiva1 | Heterogeneous nuclear ribonucleoprotein A3 OS=Homo sapiens GN=HNRNPA3 PE=1 SV=2                    | ROA3_HUMAN   | 39,595.10  | 56.80%  | 1   | 1   | 1   | 3.44%  |
| c(-)-Tiva1 | Ras-related protein Rab-11A OS=Homo sapiens GN=RAB11A PE=1 SV=3                                    | RB11A_HUMAN  | 24,393.90  | 100.00% | 2   | 2   | 2   | 11.10% |
| c(-)-Tiva1 | Pyruvate kinase isozymes M1/M2 OS=Homo sapiens GN=PKM PE=1 SV=4                                    | KPYM_HUMAN   | 57,937.50  | 100.00% | 7   | 8   | 8   | 23.00% |
| c(-)-Tiva1 | Nucleolin OS=Homo sapiens GN=NCL PE=1 SV=3                                                         | NUCL_HUMAN   | 76,615.90  | 100.00% | 9   | 9   | 9   | 18.00% |
| c(-)-Tiva1 | 4F2 cell-surface antigen heavy chain OS=Homo sapiens GN=SLC3A2 PE=1 SV=3                           | 4F2_HUMAN    | 67,996.40  | 98.30%  | 1   | 1   | 1   | 3.02%  |
| c(-)-Tiva1 | Myosin regulatory light chain 12A OS=Homo sapiens GN=MYL12A PE=1 SV=2                              | ML12A_HUMAN  | 19,795.30  | 100.00% | 8   | 10  | 11  | 49.70% |
| c(-)-Tiva1 | GTP-binding nuclear protein Ran OS=Homo sapiens GN=NRN PE=1 SV=3                                   | RAN_HUMAN    | 24,423.10  | 100.00% | 2   | 2   | 2   | 9.72%  |
| c(-)-Tiva1 | Choline-phosphate cytidylyltransferase A OS=Homo sapiens GN=PCYT1A PE=1 SV=2                       | PCY1A_HUMAN  | 41,731.10  | 62.60%  | 1   | 1   | 1   | 6.54%  |
| c(-)-Tiva1 | Inositol 1,4,5-trisphosphate receptor type 3 OS=Homo sapiens GN=ITPR3 PE=1 SV=2                    | ITPR3_HUMAN  | 304,110.30 | 100.00% | 2   | 2   | 2   | 1.46%  |
| c(-)-Tiva1 | 26S protease regulatory subunit 4 OS=Homo sapiens GN=PSMC1 PE=1 SV=1                               | PRS4_HUMAN   | 49,186.40  | 100.00% | 2   | 2   | 2   | 7.50%  |
| c(-)-Tiva1 | Epilakin OS=Homo sapiens GN=EPPK1 PE=1 SV=2                                                        | EPIPL_HUMAN  | 555,615.40 | 100.00% | 11  | 14  | 14  | 3.44%  |
| c(-)-Tiva1 | GMP synthase [glutamine-hydrolyzing] OS=Homo sapiens GN=GMPS PE=1 SV=1                             | GUAA_HUMAN   | 76,716.70  | 22.10%  | 0   | 0   | 0   | 0.00%  |
| c(-)-Tiva1 | Serine/arginine-rich splicing factor 1 OS=Homo sapiens GN=SRSF1 PE=1 SV=2                          | SRSF1_HUMAN  | 27,745.10  | 100.00% | 2   | 2   | 2   | 14.10% |
| c(-)-Tiva1 | Spectrin beta chain, non-erythrocytic 2 OS=Homo sapiens GN=SPTBN2 PE=1 SV=3                        | SPTN2_HUMAN  | 271,325.90 | 100.00% | 39  | 41  | 43  | 23.10% |
| c(-)-Tiva1 | Ras-related protein Rab-1B OS=Homo sapiens GN=RAB1B PE=1 SV=1                                      | RAB1B_HUMAN  | 22,172.00  | 76.70%  | 1   | 1   | 1   | 8.46%  |
| c(-)-Tiva1 | La-related protein 1B OS=Homo sapiens GN=LARP1B PE=1 SV=2                                          | LAR1B_HUMAN  | 105,324.50 | 5.00%   | 0   | 0   | 0   | 0.00%  |
| c(-)-Tiva1 | Keratin, type I cytoskeletal 9 OS=Homo sapiens GN=KRT9 PE=1 SV=3                                   | K1C9_HUMAN   | 62,065.90  | 100.00% | 13  | 14  | 16  | 39.80% |
| c(-)-Tiva1 | Actin-related protein 2/3 complex subunit 3 OS=Homo sapiens GN=ARPC3 PE=1 SV=3                     | ARPC3_HUMAN  | 20,547.80  | 100.00% | 2   | 2   | 2   | 15.20% |
| c(-)-Tiva1 | Heat shock protein HSP 90-beta OS=Homo sapiens GN=HSP90AB1 PE=1 SV=4                               | HS90B_HUMAN  | 83,267.30  | 100.00% | 3   | 3   | 3   | 9.25%  |
| c(-)-Tiva1 | Obscurin-like protein 1 OS=Homo sapiens GN=OBSL1 PE=1 SV=4                                         | OBSL1_HUMAN  | 206,939.70 | 99.00%  | 1   | 1   | 1   | 1.48%  |
| c(-)-Tiva1 | Tubulin alpha-4A chain OS=Homo sapiens GN=TUBAA4 PE=1 SV=1                                         | TBA4A_HUMAN  | 49,924.60  | 100.00% | 1   | 1   | 1   | 4.46%  |
| c(-)-Tiva1 | Heat shock 70 kDa protein 6 OS=Homo sapiens GN=HSPA6 PE=1 SV=2                                     | HSP76_HUMAN  | 71,028.80  | 94.50%  | 1   | 1   | 1   | 1.71%  |
| c(-)-Tiva1 | Tubulin beta chain OS=Homo sapiens GN=TUBB PE=1 SV=2                                               | TBB5_HUMAN   | 49,670.60  | 7.90%   | 0   | 0   | 0   | 0.00%  |
| c(-)-Tiva1 | Histone H100 OS=Homo sapiens GN=H1FOO PE=2 SV=1                                                    | H1FOO_HUMAN  | 35,814.40  | 51.20%  | 1   | 1   | 1   | 2.60%  |
| c(-)-Tiva1 | 14-3-3 protein zeta/delta OS=Homo sapiens GN=YVHAZ PE=1 SV=1                                       | 1433Z_HUMAN  | 27,745.90  | 95.00%  | 1   | 1   | 1   | 5.71%  |
| c(-)-Tiva1 | Peroxiredoxin-1 OS=Homo sapiens GN=PRDX1 PE=1 SV=1                                                 | PRDX1_HUMAN  | 22,110.90  | 100.00% | 6   | 7   | 8   | 32.70% |
| c(-)-Tiva1 | T-complex protein 1 subunit gamma OS=Homo sapiens GN=CTC3 PE=1 SV=4                                | TCGP_HUMAN   | 60,535.40  | 99.90%  | 2   | 2   | 2   | 4.04%  |
| c(-)-Tiva1 | 60S acidic ribosomal protein P0-like OS=Homo sapiens GN=RPLP0P6 PE=5 SV=1                          | RLA0L_HUMAN  | 34,365.10  | 99.90%  | 1   | 1   | 1   | 3.15%  |
| c(-)-Tiva1 | Importin subunit beta-1 OS=Homo sapiens GN=KPMB1 PE=1 SV=2                                         | IMB13_HUMAN  | 97,171.30  | 100.00% | 3   | 3   | 3   | 4.11%  |
| c(-)-Tiva1 | Actin-related protein 2/3 complex subunit 4 OS=Homo sapiens GN=ARPC4 PE=1 SV=3                     | ARPC4_HUMAN  | 19,667.40  | 100.00% | 3   | 3   | 3   | 17.90% |
| c(-)-Tiva1 | Protein disulfide-isomerase OS=Homo sapiens GN=P4HB PE=1 SV=3                                      | PDIA1_HUMAN  | 57,118.10  | 100.00% | 7   | 7   | 7   | 25.00% |
| c(-)-Tiva1 | RuvB-like 1 OS=Homo sapiens GN=RUVBL1 PE=1 SV=1                                                    | RUVB1_HUMAN  | 50,229.40  | 100.00% | 2   | 2   | 2   | 5.92%  |
| c(-)-Tiva1 | Uncharacterized protein C19orf21 OS=Homo sapiens GN=C19orf21 PE=1 SV=1                             | CS021_HUMAN  | 75,355.70  | 95.00%  | 1   | 1   | 1   | 2.95%  |
| c(-)-Tiva1 | Heterogeneous nuclear ribonucleoprotein R OS=Homo sapiens GN=HNRNPR PE=1 SV=1                      | HNRPR_HUMAN  | 70,943.90  | 10.70%  | 0   | 0   | 0   | 0.00%  |
| c(-)-Tiva1 | PAX-interacting protein 1 OS=Homo sapiens GN=PAXIP1 PE=1 SV=2                                      | PAXI1_HUMAN  | 121,339.90 | 95.00%  | 1   | 1   | 1   | 1.78%  |
| c(-)-Tiva1 | 40S ribosomal protein S27-like OS=Homo sapiens GN=RPS27L PE=1 SV=3                                 | RS27L_HUMAN  | 9,477.00   | 74.00%  | 1   | 1   | 1   | 15.50% |
| c(-)-Tiva1 | ERO1-like protein alpha OS=Homo sapiens GN=ERO1L PE=1 SV=2                                         | ERO1A_HUMAN  | 54,394.70  | 100.00% | 6   | 6   | 7   | 23.10% |
| c(-)-Tiva1 | Ankyrin repeat and MYND domain-containing protein 1 OS=Homo sapiens GN=ANKMY1 PE=2 SV=2            | ANKY1_HUMAN  | 105,519.30 | 71.00%  | 1   | 1   | 1   | 2.87%  |
| c(-)-Tiva1 | Ezrin OS=Homo sapiens GN=EZR PE=1 SV=4                                                             | EZRI_HUMAN   | 69,414.70  | 100.00% | 1   | 1   | 1   | 2.56%  |
| c(-)-Tiva1 | 6-phosphofructokinase type C OS=Homo sapiens GN=PFKP PE=1 SV=2                                     | K6PP_HUMAN   | 85,597.40  | 100.00% | 2   | 2   | 2   | 5.36%  |
| c(-)-Tiva1 | 116 kDa U5 small nuclear ribonucleoprotein component OS=Homo sapiens GN=EFTUD2 PE=1 SV=1           | US51_HUMAN   | 109,438.10 | 100.00% | 4   | 4   | 4   | 5.76%  |
| c(-)-Tiva1 | UDP-glucose 6-dehydrogenase OS=Homo sapiens GN=UGDH PE=1 SV=1                                      | UGDH_HUMAN   | 55,025.30  | 73.80%  | 1   | 1   | 1   | 2.02%  |
| c(-)-Tiva1 | 60S ribosomal protein L12 OS=Homo sapiens GN=RPL12 PE=1 SV=1                                       | RL12_HUMAN   | 17,819.10  | 100.00% | 3   | 3   | 3   | 28.50% |
| c(-)-Tiva1 | Actin-related protein 2/3 complex subunit 5-like protein OS=Homo sapiens GN=ARPC5L PE=1 SV=1       | ARPSL_HUMAN  | 16,941.30  | 100.00% | 2   | 2   | 2   | 16.30% |
| c(-)-Tiva1 | CD59 glycoprotein OS=Homo sapiens GN=CD59 PE=1 SV=1                                                | CD59_HUMAN   | 14,177.20  | 100.00% | 1   | 1   | 1   | 9.38%  |
| c(-)-Tiva1 | UDP-glucose:glycoprotein glucosyltransferase 1 OS=Homo sapiens GN=UGGT1 PE=1 SV=3                  | UGGG1_HUMAN  | 177,195.00 | 100.00% | 2   | 2   | 2   | 1.54%  |
| c(-)-Tiva1 | Unconventional myosin-XIX OS=Homo sapiens GN=MYO19 PE=2 SV=2                                       | MYO19_HUMAN  | 109,136.20 | 32.70%  | 0   | 0   | 0   | 0.00%  |
| c(-)-Tiva1 | Casein kinase I isoform alpha-like OS=Homo sapiens GN=CSNK1A1L PE=2 SV=2                           | KCIA1_HUMAN  | 39,087.10  | 95.00%  | 1   | 1   | 1   | 3.56%  |
| c(-)-Tiva1 | Filamin-B OS=Homo sapiens GN=FLNB PE=1 SV=2                                                        | FLNB_HUMAN   | 278,158.80 | 100.00% | 3   | 3   | 3   | 1.81%  |
| c(-)-Tiva1 | Villin-like protein OS=Homo sapiens GN=VILL PE=2 SV=3                                              | VILL_HUMAN   | 95,907.80  | 99.10%  | 1   | 1   | 1   | 2.80%  |
| c(-)-Tiva1 | Keratin, type II cytoskeletal 2 epidermal OS=Homo sapiens GN=KRT2 PE=1 SV=2                        | K22E_HUMAN   | 65,433.90  | 100.00% | 11  | 11  | 11  | 24.30% |
| c(-)-Tiva1 | Keratin, type II cytoskeletal 7 OS=Homo sapiens GN=KRT7 PE=1 SV=5                                  | K2C7_HUMAN   | 51,387.30  | 100.00% | 21  | 23  | 24  | 47.30% |
| c(-)-Tiva1 | Reticulon-4 OS=Homo sapiens GN=RTN4 PE=1 SV=2                                                      | RTN4_HUMAN   | 129,934.60 | 37.40%  | 0   | 0   | 0   | 0.00%  |
| c(-)-Tiva1 | Ribosome-binding protein 1 OS=Homo sapiens GN=RRBP1 PE=1 SV=4                                      | RRBP1_HUMAN  | 152,470.60 | 95.00%  | 1   | 1   | 1   | 0.92%  |
| c(-)-Tiva1 | Protein disulfide-isomerase A3 OS=Homo sapiens GN=PDIA3 PE=1 SV=4                                  | PDIA3_HUMAN  | 56,784.60  | 100.00% | 5   | 5   | 5   | 14.10% |
| c(-)-Tiva1 | Cytoplasmic dynein 1 heavy chain 1 OS=Homo sapiens GN=DYNC1H1 PE=1 SV=5                            | DYHC1_HUMAN  | 532,405.60 | 100.00% | 3   | 3   | 3   | 1.40%  |
| c(-)-Tiva1 | Hepatocyte growth factor receptor OS=Homo sapiens GN=MET PE=1 SV=4                                 | MET_HUMAN    | 155,543.40 | 100.00% | 13  | 14  | 14  | 13.20% |
| c(-)-Tiva1 | Coronin-1B OS=Homo sapiens GN=COR1B PE=1 SV=1                                                      | COR1B_HUMAN  | 54,234.90  | 100.00% | 3   | 3   | 4   | 11.70% |
| c(-)-Tiva1 | Coatomer subunit beta OS=Homo sapiens GN=COPB1 PE=1 SV=3                                           | COPB_HUMAN   | 107,146.00 | 100.00% | 5   | 5   | 5   | 8.60%  |
| c(-)-Tiva1 | 60S ribosomal protein L38 OS=Homo sapiens GN=RPL38 PE=1 SV=2                                       | RL38_HUMAN   | 8,218.50   | 95.00%  | 1   | 1   | 1   | 18.60% |
| c(-)-Tiva1 | Tubulin alpha-1A chain OS=Homo sapiens GN=TUBA1A PE=1 SV=1                                         | TBA1A_HUMAN  | 50,135.70  | 100.00% | 12  | 15  | 16  | 40.80% |
| c(-)-Tiva1 | DNA damage-binding protein 1 OS=Homo sapiens GN=DDB1 PE=1 SV=1                                     | DDB1_HUMAN   | 126,970.20 | 95.00%  | 1   | 1   | 1   | 2.63%  |
| c(-)-Tiva1 | Fructose-bisphosphate aldolase A OS=Homo sapiens GN=ALDOA PE=1 SV=2                                | ALDOA_HUMAN  | 39,420.60  | 87.50%  | 1   | 1   | 1   | 8.24%  |
| c(-)-Tiva1 | T-complex protein 1 subunit zeta OS=Homo sapiens GN=CCTG6 PE=1 SV=3                                | TCPZ_HUMAN   | 58,025.30  | 99.90%  | 1   | 1   | 2   | 4.71%  |
| c(-)-Tiva1 | L-2-hydroxylglutarate dehydrogenase, mitochondrial OS=Homo sapiens GN=L2HGDH PE=1 SV=3             | L2HDH_HUMAN  | 50,317.40  | 25.20%  | 0   | 0   | 0   | 0.00%  |
| c(-)-Tiva1 | Pre-mRNA-processing factor 6 OS=Homo sapiens GN=PRPF6 PE=1 SV=1                                    | PRP6_HUMAN   | 106,927.70 | 99.80%  | 1   | 1   | 1   | 1.06%  |
| c(-)-Tiva1 | Inosine-5'-monophosphate dehydrogenase 2 OS=Homo sapiens GN=IMPDH2 PE=1 SV=2                       | IMDH2_HUMAN  | 55,806.50  | 91.80%  | 1   | 1   | 1   | 2.14%  |
| c(-)-Tiva1 | Tumor suppressor p53-binding protein 1 OS=Homo sapiens GN=TP53BP1 PE=1 SV=2                        | TP53B_HUMAN  | 213,572.20 | 95.00%  | 1   | 1   | 1   | 0.76%  |
| c(-)-Tiva1 | Keratin, type II cytoskeletal 1 OS=Homo sapiens GN=KRT1 PE=1 SV=6                                  | K2C1_HUMAN   | 66,040.30  | 100.00% | 17  | 17  | 19  | 34.90% |
| c(-)-Tiva1 | Ornithine aminotransferase, mitochondrial OS=Homo sapiens GN=OAT PE=1 SV=1                         | OAT_HUMAN    | 48,536.20  | 76.80%  | 1   | 1   | 1   | 3.64%  |
| c(-)-Tiva1 | Voltage-dependent anion-selective channel protein 2 OS=Homo sapiens GN=VDAC2 PE=1 SV=2             | VDAC2_HUMAN  | 31,567.30  | 8.80%   | 0   | 0   | 0   | 0.00%  |
| c(-)-Tiva1 | Dihydrolipoyl dehydrogenase, mitochondrial OS=Homo sapiens GN=DLD PE=1 SV=2                        | DLDH_HUMAN   | 54,177.50  | 93.60%  | 1   | 1   | 1   | 2.75%  |
| c(-)-Tiva1 | Electron transfer flavoprotein subunit alpha, mitochondrial OS=Homo sapiens GN=ETFA PE=1 SV=1      | ETFA_HUMAN   | 35,080.10  | 100.00% | 2   | 2   | 2   | 10.50% |

|            |                                                                                        |                                        |             |            |         |    |     |     |        |
|------------|----------------------------------------------------------------------------------------|----------------------------------------|-------------|------------|---------|----|-----|-----|--------|
| c(-)-Tiva1 | Actin, alpha cardiac muscle 1                                                          | OS=Homo sapiens GN=ACTC1 PE=1 SV=1     | ACTC_HUMAN  | 42,020.10  | 45.40%  | 0  | 0   | 0   | 0.00%  |
| c(-)-Tiva1 | DNA-dependent protein kinase catalytic subunit                                         | OS=Homo sapiens GN=PRKDC PE=1 SV=3     | PRKDC_HUMAN | 469,095.50 | 100.00% | 60 | 62  | 67  | 20.70% |
| c(-)-Tiva1 | Guanine nucleotide-binding protein (G(i)/G(s)/G(t)) subunit beta 1                     | OS=Homo sapiens GN=GNB1 PE=1 SV=3      | GBB1_HUMAN  | 37,377.50  | 100.00% | 3  | 3   | 3   | 12.10% |
| c(-)-Tiva1 | Hypoxia up-regulated protein 1                                                         | OS=Homo sapiens GN=HYOU1 PE=1 SV=1     | HYOU1_HUMAN | 111,336.80 | 100.00% | 7  | 7   | 7   | 10.20% |
| c(-)-Tiva1 | Heterogeneous nuclear ribonucleoprotein Q                                              | OS=Homo sapiens GN=SYNCRIP PE=1 SV=2   | HNRPO_HUMAN | 69,603.50  | 14.30%  | 0  | 0   | 0   | 0.00%  |
| c(-)-Tiva1 | Myosin-14                                                                              | OS=Homo sapiens GN=MYH14 PE=1 SV=2     | MYH14_HUMAN | 227,872.60 | 100.00% | 90 | 127 | 136 | 46.20% |
| c(-)-Tiva1 | Keratin, type I cytoskeletal 10                                                        | OS=Homo sapiens GN=KRT10 PE=1 SV=6     | K1C10_HUMAN | 58,828.80  | 100.00% | 14 | 16  | 16  | 32.20% |
| c(-)-Tiva1 | Spliceosome RNA helicase DDX39B                                                        | OS=Homo sapiens GN=DDX39B PE=1 SV=1    | DX39B_HUMAN | 48,992.00  | 78.90%  | 1  | 1   | 1   | 4.44%  |
| c(-)-Tiva1 | Putative tropomyosin alpha-3 chain-like protein                                        | OS=Homo sapiens PE=5 SV=2              | TPM3L_HUMAN | 26,270.00  | 95.00%  | 1  | 1   | 1   | 6.28%  |
| c(-)-Tiva1 | Ran GTPase-activating protein 1                                                        | OS=Homo sapiens GN=RANGAP1 PE=1 SV=1   | RAGP1_HUMAN | 63,543.30  | 95.00%  | 1  | 1   | 1   | 2.56%  |
| c(-)-Tiva1 | Myosin-10                                                                              | OS=Homo sapiens GN=MYH10 PE=1 SV=3     | MYH10_HUMAN | 229,005.30 | 100.00% | 60 | 75  | 81  | 35.50% |
| c(-)-Tiva1 | Keratin, type II cytoskeletal 6A                                                       | OS=Homo sapiens GN=KRT6A PE=1 SV=3     | K2C6A_HUMAN | 60,046.40  | 100.00% | 3  | 3   | 3   | 6.74%  |
| c(-)-Tiva1 | Clathrin heavy chain 1                                                                 | OS=Homo sapiens GN=CLTC PE=1 SV=5      | CLH1_HUMAN  | 191,618.90 | 100.00% | 45 | 51  | 54  | 35.90% |
| c(-)-Tiva1 | Tubulin beta-3 chain                                                                   | OS=Homo sapiens GN=TUBB3 PE=1 SV=2     | TBB3_HUMAN  | 50,432.70  | 100.00% | 2  | 2   | 3   | 6.00%  |
| c(-)-Tiva1 | Neutral alpha-glucosidase AB                                                           | OS=Homo sapiens GN=GANAB PE=1 SV=3     | GANAB_HUMAN | 106,875.90 | 100.00% | 7  | 8   | 10  | 9.96%  |
| c(-)-Tiva1 | Poly [ADP-ribose] polymerase 1                                                         | OS=Homo sapiens GN=PARP1 PE=1 SV=4     | PARP1_HUMAN | 113,087.80 | 95.00%  | 1  | 1   | 1   | 1.48%  |
| c(-)-Tiva1 | Integrin beta-4                                                                        | OS=Homo sapiens GN=ITGB4 PE=1 SV=5     | ITB4_HUMAN  | 202,166.70 | 100.00% | 5  | 5   | 5   | 3.84%  |
| c(-)-Tiva1 | LIM domain only protein 7                                                              | OS=Homo sapiens GN=LMO7 PE=1 SV=3      | LMO7_HUMAN  | 192,699.40 | 100.00% | 23 | 23  | 25  | 22.10% |
| c(-)-Tiva1 | 40S ribosomal protein SA                                                               | OS=Homo sapiens GN=RPSA PE=1 SV=4      | RSA_HUMAN   | 32,854.10  | 100.00% | 3  | 3   | 3   | 19.30% |
| c(-)-Tiva1 | Filamin-A                                                                              | OS=Homo sapiens GN=FLNA PE=1 SV=4      | FLNA_HUMAN  | 280,729.40 | 100.00% | 2  | 2   | 2   | 1.28%  |
| c(-)-Tiva1 | Heterogeneous nuclear ribonucleoprotein F                                              | OS=Homo sapiens GN=HNRNPF PE=1 SV=3    | HNRPF_HUMAN | 45,671.90  | 95.00%  | 1  | 1   | 1   | 4.10%  |
| c(-)-Tiva1 | Zinc finger protein 185                                                                | OS=Homo sapiens GN=ZNF185 PE=1 SV=3    | ZN185_HUMAN | 73,525.40  | 95.00%  | 1  | 1   | 1   | 4.50%  |
| c(-)-Tiva1 | Protein NipSnap homolog 1                                                              | OS=Homo sapiens GN=NIPSNAP1 PE=1 SV=1  | NIPSL_HUMAN | 33,310.90  | 7.30%   | 0  | 0   | 0   | 0.00%  |
| c(-)-Tiva1 | Neutrophil gelatinase-associated lipocalin                                             | OS=Homo sapiens GN=LCN2 PE=1 SV=2      | NGAL_HUMAN  | 22,588.90  | 100.00% | 2  | 2   | 2   | 18.20% |
| c(-)-Tiva1 | Calreticulin                                                                           | OS=Homo sapiens GN=CALR PE=1 SV=1      | CALR_HUMAN  | 48,142.90  | 100.00% | 3  | 3   | 3   | 13.40% |
| c(-)-Tiva1 | Unconventional myosin-VI                                                               | OS=Homo sapiens GN=MYO6 PE=1 SV=4      | MYO6_HUMAN  | 149,697.10 | 100.00% | 24 | 26  | 26  | 22.60% |
| c(-)-Tiva1 | Protein disulfide-isomerase A4                                                         | OS=Homo sapiens GN=PDIA4 PE=1 SV=2     | PDIA4_HUMAN | 72,934.00  | 72.60%  | 2  | 2   | 2   | 1.55%  |
| c(-)-Tiva1 | WD repeat-containing protein 1                                                         | OS=Homo sapiens GN=WDR1 PE=1 SV=4      | WDR1_HUMAN  | 66,193.20  | 100.00% | 3  | 3   | 3   | 11.70% |
| c(-)-Tiva1 | Putative endoplasmic-like protein                                                      | OS=Homo sapiens GN=HSP90B2P PE=5 SV=1  | ENPLL_HUMAN | 45,859.70  | 100.00% | 2  | 2   | 2   | 4.76%  |
| c(-)-Tiva1 | Keratin, type I cytoskeletal 19                                                        | OS=Homo sapiens GN=KRT19 PE=1 SV=4     | K1C19_HUMAN | 44,107.10  | 100.00% | 16 | 17  | 17  | 50.70% |
| c(-)-Tiva1 | Endoplasmic reticulum resident protein 29                                              | OS=Homo sapiens GN=ERP29 PE=1 SV=4     | ERP29_HUMAN | 28,994.90  | 72.20%  | 1  | 1   | 1   | 4.60%  |
| c(-)-Tiva1 | Nuclear mitotic apparatus protein 1                                                    | OS=Homo sapiens GN=NUMA1 PE=1 SV=2     | NUMA1_HUMAN | 238,259.70 | 100.00% | 7  | 7   | 7   | 4.54%  |
| c(-)-Tiva1 | Transitional endoplasmic reticulum ATPase                                              | OS=Homo sapiens GN=VCP PE=1 SV=4       | TERA_HUMAN  | 89,324.80  | 100.00% | 5  | 5   | 5   | 8.93%  |
| c(-)-Tiva1 | Thioredoxin domain-containing protein 16                                               | OS=Homo sapiens GN=TXNDC16 PE=2 SV=4   | TXD16_HUMAN | 93,575.00  | 36.20%  | 0  | 0   | 0   | 0.00%  |
| c(-)-Tiva1 | Isocorismatase domain-containing protein 2, mitochondrial                              | OS=Homo sapiens GN=ISOC2 PE=1 SV=1     | ISOC2_HUMAN | 22,337.40  | 90.60%  | 1  | 1   | 1   | 11.20% |
| c(-)-Tiva1 | Fatty aldehyde dehydrogenase                                                           | OS=Homo sapiens GN=ALDH3A2 PE=1 SV=1   | AL3A2_HUMAN | 54,849.80  | 100.00% | 2  | 2   | 2   | 5.98%  |
| c(-)-Tiva1 | Prelamin-A/C                                                                           | OS=Homo sapiens GN=LMNA PE=1 SV=1      | LMNA_HUMAN  | 74,140.70  | 100.00% | 16 | 17  | 17  | 30.30% |
| c(-)-Tiva1 | ADP/ATP translocase 2                                                                  | OS=Homo sapiens GN=SLC25A5 PE=1 SV=7   | ADT2_HUMAN  | 32,853.50  | 80.30%  | 1  | 1   | 1   | 4.36%  |
| c(-)-Tiva1 | Actin-related protein 3                                                                | OS=Homo sapiens GN=ACTR3 PE=1 SV=3     | ARP3_HUMAN  | 47,371.90  | 100.00% | 7  | 7   | 7   | 21.30% |
| c(-)-Tiva1 | Putative pre-mRNA-splicing factor ATP-dependent RNA helicase DHX15                     | OS=Homo sapiens GN=DHX15 PE=1 SV=2     | DHX15_HUMAN | 90,935.20  | 95.00%  | 1  | 1   | 1   | 1.51%  |
| c(-)-Tiva1 | Exportin-2                                                                             | OS=Homo sapiens GN=CSE1L PE=1 SV=3     | XPO2_HUMAN  | 110,421.90 | 100.00% | 8  | 8   | 8   | 11.40% |
| c(-)-Tiva1 | Plastin-2                                                                              | OS=Homo sapiens GN=LCP1 PE=1 SV=6      | PLSL_HUMAN  | 70,291.20  | 94.70%  | 1  | 1   | 1   | 2.55%  |
| c(-)-Tiva1 | Agrin                                                                                  | OS=Homo sapiens GN=AGRN PE=1 SV=5      | AGRN_HUMAN  | 217,224.80 | 100.00% | 2  | 2   | 2   | 1.21%  |
| c(-)-Tiva1 | Transferrin receptor protein 1                                                         | OS=Homo sapiens GN=TFRC PE=1 SV=2      | TFR1_HUMAN  | 84,873.60  | 100.00% | 8  | 8   | 8   | 14.90% |
| c(-)-Tiva1 | Nuclear pore complex protein Nup160                                                    | OS=Homo sapiens GN=NUP160 PE=1 SV=3    | NU160_HUMAN | 162,125.00 | 80.00%  | 0  | 0   | 0   | 0.00%  |
| c(-)-Tiva1 | Doublecortin domain-containing protein 5                                               | OS=Homo sapiens GN=DCDC5 PE=2 SV=2     | DCDC5_HUMAN | 72,754.10  | 30.70%  | 0  | 0   | 0   | 0.00%  |
| c(-)-Tiva1 | Complement decay-accelerating factor                                                   | OS=Homo sapiens GN=CD55 PE=1 SV=4      | DAF_HUMAN   | 41,400.10  | 7.20%   | 0  | 0   | 0   | 0.00%  |
| c(-)-Tiva1 | Aldo-keto reductase family 1 member C3                                                 | OS=Homo sapiens GN=AKR1C3 PE=1 SV=4    | AK1C3_HUMAN | 36,854.10  | 100.00% | 1  | 1   | 1   | 6.19%  |
| c(-)-Tiva1 | Junction plakoglobin                                                                   | OS=Homo sapiens GN=JUP PE=1 SV=3       | PLAK_HUMAN  | 81,745.90  | 95.00%  | 1  | 1   | 1   | 2.68%  |
| c(-)-Tiva1 | Tubulin beta-4B chain                                                                  | OS=Homo sapiens GN=TUBB4B PE=1 SV=1    | TBB4B_HUMAN | 49,830.70  | 85.50%  | 1  | 1   | 1   | 2.70%  |
| c(-)-Tiva1 | Pyruvate dehydrogenase E1 component subunit alpha, testis-specific form, mitochondrial | OS=Homo sapiens GN=PDHA2 PE=1 SV=2     | ODPAT_HUMAN | 42,934.10  | 11.90%  | 0  | 0   | 0   | 0.00%  |
| c(-)-Tiva1 | Guanine nucleotide-binding protein (G(i)) subunit alpha-1                              | OS=Homo sapiens GN=GNAI1 PE=1 SV=2     | GNAI1_HUMAN | 40,362.50  | 91.00%  | 1  | 1   | 1   | 3.11%  |
| c(-)-Tiva1 | ATP-dependent RNA helicase A                                                           | OS=Homo sapiens GN=DXH9 PE=1 SV=4      | DXH9_HUMAN  | 140,961.50 | 100.00% | 2  | 2   | 2   | 2.36%  |
| c(-)-Tiva1 | Protein diaphanous homolog 2                                                           | OS=Homo sapiens GN=DIAPH2 PE=1 SV=1    | DIAP2_HUMAN | 125,575.80 | 8.60%   | 0  | 0   | 0   | 0.00%  |
| c(-)-Tiva1 | Heterogeneous nuclear ribonucleoprotein C-like                                         | 1 OS=Homo sapiens GN=HNRNPC1 PE=1 SV=1 | HNRCL_HUMAN | 32,142.70  | 95.00%  | 1  | 1   | 1   | 4.10%  |
| c(-)-Tiva1 | Splicing factor, proline- and glutamine-rich                                           | OS=Homo sapiens GN=SFQ PE=1 SV=2       | SFPQ_HUMAN  | 76,149.50  | 95.00%  | 1  | 1   | 1   | 1.56%  |
| c(-)-Tiva1 | Aldehyde dehydrogenase family 1 member A3                                              | OS=Homo sapiens GN=ALDH1A3 PE=1 SV=2   | AL1A3_HUMAN | 56,109.30  | 99.90%  | 1  | 1   | 1   | 2.73%  |
| c(-)-Tiva1 | Cdc42-interacting protein 4                                                            | OS=Homo sapiens GN=TRIP10 PE=1 SV=3    | CIP4_HUMAN  | 68,353.10  | 59.10%  | 1  | 1   | 1   | 2.33%  |
| c(-)-Tiva1 | Glyceraldehyde 3-phosphate dehydrogenase                                               | OS=Homo sapiens GN=GAPDH PE=1 SV=3     | G3P_HUMAN   | 36,053.40  | 100.00% | 4  | 4   | 4   | 24.80% |
| c(-)-Tiva1 | Actin-related protein 2                                                                | OS=Homo sapiens GN=ACTR2 PE=1 SV=1     | ARP2_HUMAN  | 44,761.70  | 100.00% | 4  | 4   | 4   | 10.70% |
| c(-)-Tiva1 | Eukaryotic initiation factor 4A1                                                       | OS=Homo sapiens GN=EIF4A1 PE=1 SV=1    | IF4A1_HUMAN | 46,155.30  | 100.00% | 2  | 2   | 2   | 5.91%  |
| c(-)-Tiva1 | Actin, cytoplasmic 1                                                                   | OS=Homo sapiens GN=ACTB PE=1 SV=1      | ACTB_HUMAN  | 41,737.80  | 100.00% | 11 | 32  | 75  | 41.90% |
| c(-)-Tiva1 | Pyruvate dehydrogenase E1 component subunit beta, mitochondrial                        | OS=Homo sapiens GN=PDHB PE=1 SV=3      | ODPB_HUMAN  | 39,233.40  | 100.00% | 1  | 1   | 1   | 4.46%  |
| c(-)-Tiva1 | ATP-dependent RNA helicase DDX39A                                                      | OS=Homo sapiens GN=DDX39A PE=1 SV=2    | DX39A_HUMAN | 49,129.80  | 95.00%  | 1  | 1   | 1   | 2.34%  |
| c(-)-Tiva1 | Signal recognition particle receptor subunit alpha                                     | OS=Homo sapiens GN=SRPR PE=1 SV=2      | SRPR_HUMAN  | 69,812.80  | 92.10%  | 1  | 1   | 1   | 2.19%  |
| c(-)-Tiva1 | 60S ribosomal protein L23                                                              | OS=Homo sapiens GN=RPL23 PE=1 SV=1     | RL23_HUMAN  | 14,865.90  | 95.00%  | 1  | 1   | 1   | 14.30% |
| c(-)-Tiva1 | Desmin                                                                                 | OS=Homo sapiens GN=DES PE=1 SV=3       | DESM_HUMAN  | 53,536.60  | 100.00% | 1  | 1   | 1   | 1.91%  |
| c(-)-Tiva1 | Integrator complex subunit 8                                                           | OS=Homo sapiens GN=INTS8 PE=1 SV=1     | INT8_HUMAN  | 113,091.10 | 99.90%  | 1  | 1   | 1   | 2.21%  |
| c(-)-Tiva1 | Minor histocompatibility antigen H13                                                   | OS=Homo sapiens GN=HM13 PE=1 SV=1      | HM13_HUMAN  | 41,490.90  | 95.00%  | 1  | 1   | 1   | 6.37%  |
| c(-)-Tiva1 | 40S ribosomal protein S7                                                               | OS=Homo sapiens GN=RP57 PE=1 SV=1      | RS7_HUMAN   | 22,127.50  | 95.90%  | 0  | 0   | 0   | 0.00%  |
| c(-)-Tiva1 | Aldo-keto reductase family 1 member C2                                                 | OS=Homo sapiens GN=AKR1C2 PE=1 SV=3    | AK1C2_HUMAN | 36,735.90  | 99.90%  | 1  | 1   | 1   | 3.72%  |
| c(-)-Tiva1 | Keratin, type II cytoskeletal 75                                                       | OS=Homo sapiens GN=KRT75 PE=1 SV=2     | K2C75_HUMAN | 59,561.30  | 71.80%  | 1  | 1   | 1   | 1.63%  |
| c(-)-Tiva1 | A-kinase anchor protein 2                                                              | OS=Homo sapiens GN=AKAP2 PE=1 SV=3     | AKAP2_HUMAN | 94,660.90  | 100.00% | 9  | 9   | 10  | 20.30% |
| c(-)-Tiva1 | Estradiol 17-beta-dehydrogenase 12                                                     | OS=Homo sapiens GN=HSD17B12 PE=1 SV=2  | DHB12_HUMAN | 34,325.40  | 99.60%  | 1  | 1   | 1   | 4.81%  |
| c(-)-Tiva1 | Fascin                                                                                 | OS=Homo sapiens GN=FSCN1 PE=1 SV=3     | FSCN1_HUMAN | 54,530.30  | 78.10%  | 1  | 1   | 1   | 4.87%  |
| c(-)-Tiva1 | Enoyl-CoA delta isomerase 1, mitochondrial                                             | OS=Homo sapiens GN=ECI1 PE=1 SV=1      | ECI1_HUMAN  | 32,816.50  | 95.00%  | 1  | 1   | 1   | 4.30%  |
| c(-)-Tiva1 | Lysosomal alpha-glucosidase                                                            | OS=Homo sapiens GN=GAA PE=1 SV=4       | LYAG_HUMAN  | 105,324.40 | 87.10%  | 0  | 0   | 0   | 0.00%  |
| c(-)-Tiva1 | Splicing factor 3B subunit 3                                                           | OS=Homo sapiens GN=SF3B3 PE=1 SV=4     | SF3B3_HUMAN | 135,579.40 | 100.00% | 2  | 2   | 2   | 2.47%  |
| c(-)-Tiva1 | X-ray repair cross-complementing protein 6                                             | OS=Homo sapiens GN=XRCC6 PE=1 SV=2     | XRCC6_HUMAN | 69,846.40  | 78.40%  | 1  | 1   | 1   | 2.30%  |
| c(-)-Tiva1 | 26S protease regulatory subunit 10B                                                    | OS=Homo sapiens GN=PSMC6 PE=1 SV=1     | PRS10_HUMAN | 44,174.90  | 100.00% | 4  | 4   | 4   | 17.50% |
| c(-)-Tiva1 | Actin, aortic smooth muscle                                                            | OS=Homo sapiens GN=ACTA2 PE=1 SV=1     | ACTA_HUMAN  | 42,010.10  | 100.00% | 16 | 34  | 52  | 36.30% |
| c(-)-Tiva1 | NAD(P)H dehydrogenase [quinone] 1                                                      | OS=Homo sapiens GN=NQO1 PE=1 SV=1      | NQO1_HUMAN  | 30,869.00  | 100.00% | 3  | 3   | 3   | 13.10% |
| c(-)-Tiva1 | Keratin, type I cytoskeletal 18                                                        | OS=Homo sapiens GN=KRT18 PE=1 SV=2     | K1C18_HUMAN | 48,059.00  | 100.00% | 18 | 20  | 21  | 45.30% |
| c(-)-Tiva1 | Band 4.1-like protein 1                                                                | OS=Homo sapiens GN=EPB41L1 PE=1 SV=2   | E41L1_HUMAN | 98,505.30  | 40.90%  | 0  | 0   | 0   | 0.00%  |
| c(-)-Tiva1 | Aspartate aminotransferase, mitochondrial                                              | OS=Homo sapiens GN=GOT2 PE=1 SV=3      | AATM_HUMAN  | 47,518.60  | 100.00% | 2  | 2   | 2   | 7.44%  |
| c(-)-Tiva1 | 26S protease regulatory subunit 6B                                                     | OS=Homo sapiens GN=PSMC4 PE=1 SV=2     | PRS6B_HUMAN | 47,367.70  | 100.00% | 2  | 2   | 3   | 12.40% |
| c(-)-Tiva1 | Sarcoplasmic/endoplasmic reticulum calcium ATPase 2                                    | OS=Homo sapiens GN=ATP2A2 PE=1 SV=1    | AT2A2_HUMAN | 114,758.80 | 91.70%  | 1  | 1   | 1   | 1.44%  |
| c(-)-Tiva1 | Ladinin-1                                                                              | OS=Homo sapiens GN=LAD1 PE=1 SV=2      | LAD1_HUMAN  | 57,131.80  | 100.00% | 4  | 4   | 4   | 11.80% |
| c(-)-Tiva1 | Aldehyde dehydrogenase, dimeric NADP-preferring                                        | OS=Homo sapiens GN=ALDH3A1 PE=1 SV=3   | AL3A1_HUMAN | 50,395.70  | 100.00% | 3  | 3   | 3   | 8.83%  |
| c(-)-Tiva1 | Tubulin alpha-1B chain                                                                 | OS=Homo sapiens GN=TUBA1B PE=1 SV=1    | TBA1B_HUMAN | 50,151.70  | 100.00% | 3  | 3   | 3   | 6.21%  |
| c(-)-Tiva1 | LIM domain and actin-binding protein 1                                                 | OS=Homo sapiens GN=LIMA1 PE=1 SV=1     | LIMA1_HUMAN | 85,226.30  | 100.00% | 39 | 51  | 56  | 56.90% |
| c(-)-Tiva1 | Delta(3,5)-Delta(2,4)-dienoyl-CoA isomerase, mitochondrial                             | OS=Homo sapiens GN=ECH1 PE=1 SV=2      | ECH1_HUMAN  | 35,816.20  | 62.50%  | 1  | 1   | 1   | 4.88%  |
| c(-)-Tiva1 | Tubulin beta-1 chain                                                                   | OS=Homo sapiens GN=TUBB1 PE=1 SV=1     | TBB1_HUMAN  | 50,327.00  | 100.00% | 2  | 2   | 2   | 3.99%  |
| c(-)-Tiva1 | ADP/ATP translocase 1                                                                  | OS=Homo sapiens GN=SLC25A4 PE=1 SV=4   | ADT1_HUMAN  | 33,065.40  | 8.90%   | 0  | 0   | 0   | 0.00%  |
| c(-)-Tiva1 | Cell division cycle and apoptosis regulator protein 1                                  | OS=Homo sapiens GN=CCAR1 PE=1 SV=2     | CCAR1_HUMAN | 132,823.70 | 62.60%  | 0  | 0   | 0   | 0.00%  |
| c(-)-Tiva1 | OTU domain-containing protein 5                                                        | OS=Homo sapiens GN=OTUD5 PE=1 SV=1     | OTUD5_HUMAN | 60,624.80  | 23.40%  | 0  | 0   | 0   | 0.00%  |
| c(-)-Tiva1 | Exportin-1                                                                             | OS=Homo sapiens GN=XPO1 PE=1 SV=1      | XPO1_HUMAN  | 123,388.90 | 100.00% | 7  | 7   | 7   | 9.24%  |
| c(-)-Tiva1 | CAD protein                                                                            | OS=Homo sapiens GN=CAD PE=1 SV=3       | PYR1_HUMAN  | 242,982.50 | 95.00%  | 1  | 1   | 1   | 0.54%  |
| c(-)-Tiva1 | Myeloid-associated differentiation marker                                              | OS=Homo sapiens GN=MYADM PE=1 SV=2     | MYADM_HUMAN | 35,274.20  | 100.00% | 2  | 2   | 2   | 10.20% |
| c(-)-Tiva1 | Protein SEC13 homolog                                                                  | OS=Homo sapiens GN=SEC13 PE=1 SV=3     | SEC13_HUMAN | 35,539.60  | 85.70%  | 1  | 1   | 1   | 7.14%  |
| c(-)-Tiva1 | 5'-nucleotidase                                                                        | OS=Homo sapiens GN=NT5E PE=1 SV=1      | NTD_HUMAN   | 63,369.00  | 100.00% | 9  | 10  | 10  | 24.20% |
| c(-)-Tiva1 | Splicing factor 3B subunit 2                                                           | OS=Homo sapiens GN=SF3B2 PE=1 SV=2     | SF3B2_HUMAN | 100,229.40 | 92.30%  | 1  | 1   | 1   | 3.24%  |
| c(-)-Tiva1 | Fliotillin-1                                                                           | OS=Homo sapiens GN=FLT1 PE=1 SV=3      | FLOT1_HUMAN | 47,354.80  | 99.90%  | 1  | 1   | 1   | 4.22%  |
| c(-)-Tiva1 | Guanine nucleotide-binding protein-like 3                                              | OS=Homo sapiens GN=GNL3 PE=1 SV=2      | GNL3_HUMAN  | 61,994.70  | 94.40%  | 1  | 1   | 1   | 2.73%  |
| c(-)-Tiva1 | Mammalian ependymin-related protein 1                                                  | OS=Homo sapiens GN=EPDR1 PE=1 SV=2     | EPDR1_HUMAN | 25,437.50  | 100.00% | 2  | 2   | 2   | 9.82%  |
| c(-)-Tiva1 | POTE ankyrin domain family member J                                                    | OS=Homo sapiens GN=POTEJ PE=3 SV=1     | POTEJ_HUMAN | 117,392.60 | 69.90%  | 1  | 1   | 1   | 2.41%  |
| c(-)-Tiva1 | Keratin, type II cytoskeletal 3                                                        | OS=Homo sapiens GN=KRT3 PE=1 SV=3      | K2C3_HUMAN  | 64,418.90  | 95.00%  | 1  | 1   | 1   | 1.91%  |
| c(-)-Tiva1 | Unconventional myosin-Ie                                                               | OS=Homo sapiens GN=MYO1E PE=1 SV=2     | MYO1E_HUMAN | 127,066.30 | 100.00% | 8  | 8   | 8   | 10.50% |
| c(-)-Tiva1 | Myosin light polypeptide 6                                                             | OS=Homo sapiens GN=MYL6 PE=1 SV=2      | MYL6_HUMAN  | 16,929.80  | 100.00% | 5  | 7   | 7   | 42.4   |

|            |                                                                                                              |              |            |         |    |    |    |        |
|------------|--------------------------------------------------------------------------------------------------------------|--------------|------------|---------|----|----|----|--------|
| c(-)-Tiva1 | Long-chain-fatty-acyl-CoA ligase 3 OS=Homo sapiens GN=ACSL3 PE=1 SV=3                                        | ACSL3_HUMAN  | 80,423.10  | 22.90%  | 0  | 0  | 0  | 0.00%  |
| c(-)-Tiva1 | Histone deacetylase 10 OS=Homo sapiens GN=HDAC10 PE=1 SV=1                                                   | HDAC10_HUMAN | 71,444.80  | 100.00% | 2  | 2  | 2  | 5.83%  |
| c(-)-Tiva1 | Src substrate cortactin OS=Homo sapiens GN=CTTN PE=1 SV=2                                                    | SRC8_HUMAN   | 61,585.50  | 14.40%  | 0  | 0  | 0  | 0.00%  |
| c(-)-Tiva1 | 60S ribosomal protein L10a OS=Homo sapiens GN=RP10A PE=1 SV=2                                                | RL10A_HUMAN  | 24,832.00  | 24.80%  | 0  | 0  | 0  | 0.00%  |
| c(-)-Tiva1 | T-complex protein 1 subunit beta OS=Homo sapiens GN=CTCF PE=1 SV=4                                           | TCPB_HUMAN   | 57,489.90  | 100.00% | 2  | 3  | 3  | 8.22%  |
| c(-)-Tiva1 | V-type proton ATPase 116 kDa subunit a isoform 1 OS=Homo sapiens GN=ATP6V0A1 PE=1 SV=3                       | VPP1_HUMAN   | 96,416.60  | 95.00%  | 1  | 1  | 1  | 2.27%  |
| c(-)-Tiva1 | Glutamate dehydrogenase 1, mitochondrial OS=Homo sapiens GN=GLUD1 PE=1 SV=1                                  | DHE3_HUMAN   | 61,399.70  | 100.00% | 14 | 16 | 18 | 33.00% |
| c(-)-Tiva1 | Aldo-keto reductase family 1 member C1 OS=Homo sapiens GN=AKR1C1 PE=1 SV=1                                   | AK1C1_HUMAN  | 36,789.10  | 100.00% | 3  | 3  | 3  | 14.90% |
| c(-)-Tiva1 | Keratin, type II cytoskeletal 8 OS=Homo sapiens GN=KRT8 PE=1 SV=7                                            | K2C8_HUMAN   | 53,706.20  | 100.00% | 16 | 19 | 19 | 36.60% |
| c(-)-Tiva1 | Nesprin-2 OS=Homo sapiens GN=SYNE2 PE=1 SV=3                                                                 | SYNE2_HUMAN  | 796,453.70 | 82.20%  | 1  | 1  | 1  | 0.35%  |
| c(-)-Tiva1 | Elongation factor Tu, mitochondrial OS=Homo sapiens GN=EFU1M PE=1 SV=2                                       | EFU1M_HUMAN  | 49,542.40  | 100.00% | 8  | 8  | 8  | 19.50% |
| c(-)-Tiva1 | Nuclear pore complex protein Nup205 OS=Homo sapiens GN=NUP205 PE=1 SV=3                                      | NU205_HUMAN  | 227,928.40 | 90.70%  | 1  | 1  | 1  | 0.65%  |
| c(-)-Tiva1 | Tropomyosin alpha-3 chain OS=Homo sapiens GN=TPM3 PE=1 SV=1                                                  | TPM3_HUMAN   | 32,820.20  | 100.00% | 3  | 4  | 4  | 16.20% |
| c(-)-Tiva1 | Isocitrate dehydrogenase [NADP], mitochondrial OS=Homo sapiens GN=IDH2 PE=1 SV=2                             | IDHP_HUMAN   | 50,910.40  | 94.00%  | 1  | 1  | 1  | 2.43%  |
| c(-)-Tiva1 | Fatty acid synthase OS=Homo sapiens GN=FASN PE=1 SV=3                                                        | FAS_HUMAN    | 273,427.10 | 100.00% | 2  | 2  | 3  | 1.27%  |
| c(-)-Tiva1 | NF-kappa-B-activating protein OS=Homo sapiens GN=NKAP PE=1 SV=1                                              | NKAP_HUMAN   | 47,140.40  | 32.40%  | 0  | 0  | 0  | 0.00%  |
| c(-)-Tiva1 | Pyrroline-5-carboxylate reductase 1, mitochondrial OS=Homo sapiens GN=PYCR1 PE=1 SV=2                        | P5CR1_HUMAN  | 33,361.10  | 95.00%  | 1  | 1  | 1  | 4.08%  |
| c(-)-Tiva1 | Ubiquitin-60S ribosomal protein L40 OS=Homo sapiens GN=UBA52 PE=1 SV=2                                       | RL40_HUMAN   | 14,728.90  | 99.90%  | 1  | 1  | 1  | 12.50% |
| c(-)-Tiva1 | X-ray repair cross-complementing protein 5 OS=Homo sapiens GN=XRCC5 PE=1 SV=3                                | XRCC5_HUMAN  | 82,707.10  | 42.70%  | 0  | 0  | 0  | 0.00%  |
| c(-)-Tiva1 | Beta-actin-like protein 2 OS=Homo sapiens GN=ACTBL2 PE=1 SV=2                                                | ACTBL_HUMAN  | 42,004.20  | 100.00% | 2  | 3  | 3  | 3.19%  |
| c(-)-Tiva1 | Polypyrimidine tract-binding protein 1 OS=Homo sapiens GN=PTBP1 PE=1 SV=1                                    | PTBP1_HUMAN  | 57,222.50  | 39.20%  | 0  | 0  | 0  | 0.00%  |
| c(-)-Tiva1 | Tubulin beta-2A chain OS=Homo sapiens GN=TUBB2A PE=1 SV=1                                                    | TBB2A_HUMAN  | 49,907.10  | 100.00% | 9  | 10 | 10 | 28.80% |
| c(-)-Tiva1 | Probable ATP-dependent RNA helicase DDX17 OS=Homo sapiens GN=DDX17 PE=1 SV=2                                 | DDX17_HUMAN  | 80,274.00  | 95.00%  | 1  | 1  | 1  | 2.06%  |
| c(-)-Tiva1 | Myosin-11 OS=Homo sapiens GN=MYH11 PE=1 SV=3                                                                 | MYH11_HUMAN  | 227,344.60 | 100.00% | 11 | 15 | 21 | 5.27%  |
| c(-)-Tiva1 | Serine/threonine-protein kinase ATR OS=Homo sapiens GN=ATR PE=1 SV=3                                         | ATR_HUMAN    | 301,373.40 | 100.00% | 2  | 2  | 2  | 0.87%  |
| c(-)-Tiva1 | Keratin, type I cytoskeletal 17 OS=Homo sapiens GN=KRT17 PE=1 SV=2                                           | K1C17_HUMAN  | 48,106.70  | 100.00% | 2  | 2  | 2  | 5.09%  |
| c(-)-Tiva1 | Tubulin alpha-1C chain OS=Homo sapiens GN=TUBA1C PE=1 SV=1                                                   | TBA1C_HUMAN  | 49,895.50  | 100.00% | 2  | 2  | 2  | 9.13%  |
| c(-)-Tiva1 | Coatomer subunit alpha OS=Homo sapiens GN=COPA PE=1 SV=2                                                     | COPA_HUMAN   | 138,349.30 | 100.00% | 1  | 1  | 1  | 0.82%  |
| c(-)-Tiva1 | Sarcoplasmic/endoplasmic reticulum calcium ATPase 1 OS=Homo sapiens GN=ATP2A1 PE=1 SV=1                      | AT2A1_HUMAN  | 110,254.90 | 91.20%  | 1  | 1  | 1  | 1.50%  |
| c(-)-Tiva1 | Small nuclear ribonucleoprotein E OS=Homo sapiens GN=SMRPE PE=1 SV=1                                         | RUXE_HUMAN   | 10,803.90  | 49.90%  | 1  | 1  | 1  | 12.00% |
| c(-)-Tiva1 | Adenosylhomocysteinase OS=Homo sapiens GN=AHCY PE=1 SV=4                                                     | SAHH_HUMAN   | 47,717.10  | 100.00% | 2  | 2  | 2  | 5.79%  |
| c(-)-Tiva1 | Unconventional myosin-Vb OS=Homo sapiens GN=MYO5B PE=1 SV=3                                                  | MYO5B_HUMAN  | 213,676.50 | 100.00% | 9  | 9  | 9  | 7.90%  |
| c(-)-Tiva1 | 40S ribosomal protein S5 OS=Homo sapiens GN=RP55 PE=1 SV=4                                                   | RS5_HUMAN    | 22,877.00  | 95.00%  | 1  | 1  | 1  | 7.35%  |
| c(-)-Tiva1 | Harmonin OS=Homo sapiens GN=USH1C PE=1 SV=3                                                                  | USH1C_HUMAN  | 62,211.80  | 73.70%  | 1  | 1  | 1  | 2.54%  |
| c(-)-Tiva1 | Heat shock 70 kDa protein 1A/1B OS=Homo sapiens GN=HSPA1A PE=1 SV=5                                          | HSP71_HUMAN  | 70,054.00  | 100.00% | 4  | 4  | 4  | 8.11%  |
| c(-)-Tiva1 | Coatomer subunit gamma-1 OS=Homo sapiens GN=COPG1 PE=1 SV=1                                                  | COPG1_HUMAN  | 97,719.40  | 99.80%  | 1  | 1  | 1  | 1.37%  |
| c(-)-Tiva1 | Gelsolin OS=Homo sapiens GN=GSN PE=1 SV=1                                                                    | GELS_HUMAN   | 85,697.80  | 100.00% | 13 | 16 | 19 | 31.50% |
| c(-)-Tiva1 | Single-stranded DNA-binding protein, mitochondrial OS=Homo sapiens GN=SSBP1 PE=1 SV=1                        | SSBP_HUMAN   | 17,259.70  | 92.90%  | 1  | 1  | 1  | 12.20% |
| c(-)-Tiva1 | Peroxisomal multifunctional enzyme type 2 OS=Homo sapiens GN=HSD17B4 PE=1 SV=3                               | DHB4_HUMAN   | 79,688.50  | 100.00% | 4  | 4  | 4  | 6.79%  |
| c(-)-Tiva1 | ATP synthase subunit beta, mitochondrial OS=Homo sapiens GN=ATP5B PE=1 SV=3                                  | ATPB_HUMAN   | 56,560.60  | 100.00% | 3  | 3  | 3  | 9.83%  |
| c(-)-Tiva1 | L-lactate dehydrogenase A-like 6A OS=Homo sapiens GN=LDHA6A PE=2 SV=1                                        | LDH6A_HUMAN  | 36,508.40  | 78.20%  | 1  | 1  | 1  | 3.61%  |
| c(-)-Tiva1 | Erythrocyte band 7 integral membrane protein OS=Homo sapiens GN=STOM PE=1 SV=3                               | STOM_HUMAN   | 31,732.10  | 100.00% | 2  | 2  | 2  | 10.80% |
| c(-)-Tiva1 | Fragile X mental retardation syndrome-related protein 1 OS=Homo sapiens GN=FXR1 PE=1 SV=3                    | FXR1_HUMAN   | 69,720.90  | 95.00%  | 1  | 1  | 1  | 2.90%  |
| c(-)-Tiva1 | Splicing factor 3B subunit 1 OS=Homo sapiens GN=SF3B1 PE=1 SV=3                                              | SF3B1_HUMAN  | 145,835.30 | 99.80%  | 1  | 1  | 1  | 1.23%  |
| c(-)-Tiva1 | Guanine nucleotide-binding protein subunit beta-2-like 1 OS=Homo sapiens GN=GNB2L1 PE=1 SV=3                 | GBLP_HUMAN   | 35,077.00  | 100.00% | 4  | 4  | 4  | 19.20% |
| c(-)-Tiva1 | Apelin receptor OS=Homo sapiens GN=APLNR PE=1 SV=1                                                           | APJ_HUMAN    | 42,661.10  | 36.70%  | 0  | 0  | 0  | 0.00%  |
| c(-)-Tiva1 | Heterogeneous nuclear ribonucleoproteins C1/C2 OS=Homo sapiens GN=HNRNPC PE=1 SV=4                           | HNRPC_HUMAN  | 33,670.50  | 93.00%  | 1  | 1  | 1  | 3.59%  |
| c(-)-Tiva1 | Periplakin OS=Homo sapiens GN=PPL PE=1 SV=4                                                                  | PEPL_HUMAN   | 204,747.20 | 100.00% | 10 | 10 | 10 | 7.92%  |
| c(-)-Tiva1 | 78 kDa glucose-regulated protein OS=Homo sapiens GN=HSPA5 PE=1 SV=2                                          | GRP78_HUMAN  | 72,334.70  | 100.00% | 22 | 22 | 23 | 37.20% |
| c(-)-Tiva1 | Transketolase OS=Homo sapiens GN=TKT PE=1 SV=3                                                               | TKT_HUMAN    | 67,879.40  | 98.40%  | 1  | 1  | 1  | 2.89%  |
| c(-)-Tiva1 | Heterogeneous nuclear ribonucleoprotein M OS=Homo sapiens GN=HNRNPM PE=1 SV=3                                | HNRPM_HUMAN  | 77,517.30  | 100.00% | 2  | 2  | 2  | 4.66%  |
| c(-)-Tiva1 | Laminin subunit beta-3 OS=Homo sapiens GN=LAMB3 PE=1 SV=1                                                    | LAMB3_HUMAN  | 129,571.00 | 100.00% | 1  | 1  | 2  | 1.71%  |
| c(-)-Tiva1 | 6-phosphofructokinase, liver type OS=Homo sapiens GN=PFKL PE=1 SV=6                                          | K6PL_HUMAN   | 85,019.20  | 90.80%  | 1  | 1  | 1  | 2.31%  |
| c(-)-Tiva1 | Glucose-6-phosphate 1-dehydrogenase OS=Homo sapiens GN=GGPD PE=1 SV=4                                        | GGPD_HUMAN   | 59,258.10  | 100.00% | 3  | 3  | 3  | 8.16%  |
| c(-)-Tiva1 | Far upstream element-binding protein 2 OS=Homo sapiens GN=KHSRP PE=1 SV=4                                    | FUBP2_HUMAN  | 73,115.60  | 100.00% | 2  | 2  | 2  | 3.38%  |
| c(-)-Tiva1 | 40S ribosomal protein S17-like OS=Homo sapiens GN=RP517L PE=2 SV=1                                           | RS17L_HUMAN  | 15,550.50  | 74.60%  | 1  | 1  | 1  | 16.30% |
| c(-)-Tiva1 | 26S proteasome non-ATPase regulatory subunit 3 OS=Homo sapiens GN=PSMD3 PE=1 SV=2                            | PSMD3_HUMAN  | 60,979.60  | 83.60%  | 1  | 1  | 1  | 2.43%  |
| c(-)-Tiva1 | Retinoic acid-induced protein 3 OS=Homo sapiens GN=GRPC5A PE=1 SV=2                                          | RAI3_HUMAN   | 40,252.60  | 100.00% | 2  | 2  | 2  | 14.80% |
| c(-)-Tiva1 | T-complex protein 1 subunit delta OS=Homo sapiens GN=CTCF PE=1 SV=4                                          | TCPD_HUMAN   | 57,926.00  | 16.40%  | 0  | 0  | 0  | 0.00%  |
| c(-)-Tiva1 | AP-2 complex subunit alpha-2 OS=Homo sapiens GN=AP2A2 PE=1 SV=2                                              | AP2A2_HUMAN  | 103,962.80 | 99.30%  | 1  | 1  | 1  | 1.17%  |
| c(-)-Tiva1 | Cofilin-1 OS=Homo sapiens GN=COF1 PE=1 SV=3                                                                  | COF1_HUMAN   | 18,503.20  | 27.90%  | 0  | 0  | 0  | 0.00%  |
| c(-)-Tiva1 | Prolyl 4-hydroxylase subunit alpha-1 OS=Homo sapiens GN=P4HA1 PE=1 SV=2                                      | P4HA1_HUMAN  | 61,051.60  | 99.90%  | 1  | 1  | 1  | 2.62%  |
| c(-)-Tiva1 | Dynamitin-like 120 kDa protein, mitochondrial OS=Homo sapiens GN=OPA1 PE=1 SV=3                              | OPA1_HUMAN   | 111,633.90 | 100.00% | 13 | 14 | 14 | 18.00% |
| c(-)-Tiva1 | Splicing factor 3A subunit 1 OS=Homo sapiens GN=SF3A1 PE=1 SV=1                                              | SF3A1_HUMAN  | 88,886.10  | 95.00%  | 1  | 1  | 1  | 1.89%  |
| c(-)-Tiva1 | Polyadenylate-binding protein 1 OS=Homo sapiens GN=PABPC1 PE=1 SV=2                                          | PABP1_HUMAN  | 70,671.30  | 100.00% | 4  | 4  | 4  | 8.33%  |
| c(-)-Tiva1 | Catenin delta-1 OS=Homo sapiens GN=CTNND1 PE=1 SV=1                                                          | CTND1_HUMAN  | 108,171.90 | 100.00% | 2  | 2  | 2  | 3.93%  |
| c(-)-Tiva1 | Glutathione S-transferase P OS=Homo sapiens GN=GSTP1 PE=1 SV=2                                               | GSTP1_HUMAN  | 23,356.70  | 95.00%  | 1  | 1  | 1  | 9.05%  |
| c(-)-Tiva1 | Leucine-rich repeat flightless-interacting protein 2 OS=Homo sapiens GN=LRRFIP2 PE=1 SV=1                    | LRRF2_HUMAN  | 82,174.50  | 82.10%  | 1  | 1  | 1  | 1.94%  |
| c(-)-Tiva1 | N6-adenosine-methyltransferase 70 kDa subunit OS=Homo sapiens GN=METT13 PE=1 SV=2                            | MTA70_HUMAN  | 64,475.00  | 93.60%  | 1  | 1  | 1  | 3.10%  |
| c(-)-Tiva1 | Heterogeneous nuclear ribonucleoprotein H2 OS=Homo sapiens GN=HNRNP2 PE=1 SV=1                               | HNRH2_HUMAN  | 49,264.10  | 92.90%  | 1  | 1  | 1  | 3.79%  |
| c(-)-Tiva1 | T-complex protein 1 subunit alpha OS=Homo sapiens GN=TCPI1 PE=1 SV=1                                         | TCPI_HUMAN   | 60,345.20  | 95.00%  | 1  | 1  | 1  | 4.14%  |
| c(-)-Tiva1 | Mitogen-activated protein kinase kinase kinase 6 OS=Homo sapiens GN=MAP3K6 PE=1 SV=3                         | M3K6_HUMAN   | 142,598.40 | 85.40%  | 1  | 1  | 1  | 1.40%  |
| c(-)-Tiva1 | Sequestosome-1 OS=Homo sapiens GN=SQSTM1 PE=1 SV=1                                                           | SQSTM_HUMAN  | 47,687.40  | 97.60%  | 1  | 1  | 1  | 3.41%  |
| c(-)-Tiva1 | Drebrin OS=Homo sapiens GN=DBN1 PE=1 SV=4                                                                    | DREB_HUMAN   | 71,428.60  | 100.00% | 20 | 25 | 25 | 46.20% |
| c(-)-Tiva1 | Peptidyl-prolyl cis-trans isomerase A OS=Homo sapiens GN=PPIA PE=1 SV=2                                      | PPIA_HUMAN   | 18,012.90  | 78.30%  | 1  | 1  | 1  | 6.67%  |
| c(-)-Tiva1 | Malate dehydrogenase, mitochondrial OS=Homo sapiens GN=MDH2 PE=1 SV=3                                        | MDHM_HUMAN   | 35,503.70  | 100.00% | 9  | 9  | 9  | 39.30% |
| c(-)-Tiva1 | Leucine-rich PPR motif-containing protein, mitochondrial OS=Homo sapiens GN=LRPPRC PE=1 SV=3                 | LRPRC_HUMAN  | 157,912.20 | 100.00% | 3  | 3  | 3  | 4.09%  |
| c(-)-Tiva1 | Unconventional myosin-Va OS=Homo sapiens GN=MYOSA PE=1 SV=2                                                  | MYOSA_HUMAN  | 215,412.60 | 100.00% | 19 | 19 | 19 | 15.10% |
| c(-)-Tiva1 | Palmitoyl-protein thioesterase 1 OS=Homo sapiens GN=PP1T PE=1 SV=1                                           | PPT1_HUMAN   | 34,194.00  | 100.00% | 2  | 2  | 2  | 10.80% |
| c(-)-Tiva1 | 60 kDa heat shock protein, mitochondrial OS=Homo sapiens GN=HSPD1 PE=1 SV=2                                  | CH60_HUMAN   | 61,055.70  | 100.00% | 10 | 11 | 13 | 28.30% |
| c(-)-Tiva1 | Unconventional myosin-Ic OS=Homo sapiens GN=MYO1C PE=1 SV=4                                                  | MYO1C_HUMAN  | 121,684.90 | 100.00% | 19 | 19 | 19 | 22.50% |
| c(-)-Tiva1 | DnaJ homolog subfamily C member 13 OS=Homo sapiens GN=DNAJC13 PE=1 SV=5                                      | DJC13_HUMAN  | 254,422.90 | 100.00% | 3  | 3  | 3  | 1.96%  |
| c(-)-Tiva1 | AP-1 complex subunit beta-1 OS=Homo sapiens GN=AP1B1 PE=1 SV=2                                               | AP1B1_HUMAN  | 104,639.40 | 99.90%  | 1  | 1  | 1  | 1.26%  |
| c(-)-Tiva1 | Tropomyosin beta chain OS=Homo sapiens GN=TPM2 PE=1 SV=1                                                     | TPM2_HUMAN   | 32,851.70  | 53.50%  | 1  | 1  | 1  | 5.63%  |
| c(-)-Tiva1 | 26S proteasome non-ATPase regulatory subunit 2 OS=Homo sapiens GN=PSMD2 PE=1 SV=3                            | PSMD2_HUMAN  | 100,202.20 | 100.00% | 5  | 5  | 5  | 8.26%  |
| c(-)-Tiva1 | Tubulin beta-8 chain OS=Homo sapiens GN=TUBB8 PE=1 SV=2                                                      | TBB8_HUMAN   | 49,776.30  | 95.00%  | 1  | 2  | 2  | 7.21%  |
| c(-)-Tiva1 | Glycogen synthase kinase-3 beta OS=Homo sapiens GN=GSK3B PE=1 SV=2                                           | GSK3B_HUMAN  | 46,745.30  | 100.00% | 9  | 10 | 11 | 32.90% |
| c(-)-Tiva2 | Aspartyl/asparaginyl beta-hydroxylase OS=Homo sapiens GN=ASPH PE=1 SV=3                                      | ASPH_HUMAN   | 85,862.60  | 100.00% | 8  | 8  | 8  | 15.00% |
| c(-)-Tiva2 | Protein scribble homolog OS=Homo sapiens GN=SCRIB PE=1 SV=4                                                  | SCRIB_HUMAN  | 174,887.30 | 95.90%  | 0  | 0  | 0  | 0.00%  |
| c(-)-Tiva2 | Ras GTPase-activating-like protein IQGAP1 OS=Homo sapiens GN=IQGAP1 PE=1 SV=1                                | IQGA1_HUMAN  | 189,258.60 | 100.00% | 18 | 18 | 18 | 15.60% |
| c(-)-Tiva2 | Alpha-actinin-4 OS=Homo sapiens GN=ACTN4 PE=1 SV=2                                                           | ACTN4_HUMAN  | 104,857.20 | 100.00% | 20 | 21 | 21 | 24.30% |
| c(-)-Tiva2 | Major vault protein OS=Homo sapiens GN=MVP PE=1 SV=4                                                         | MVP_HUMAN    | 99,326.00  | 100.00% | 2  | 2  | 2  | 3.70%  |
| c(-)-Tiva2 | Microtubule-actin cross-linking factor 1, isoforms 1/2/3/5 OS=Homo sapiens GN=MACF1 PE=1 SV=4                | MACF1_HUMAN  | 838,314.20 | 78.60%  | 1  | 1  | 1  | 0.11%  |
| c(-)-Tiva2 | Coatomer subunit beta' OS=Homo sapiens GN=COPB2 PE=1 SV=2                                                    | COPB2_HUMAN  | 102,489.10 | 100.00% | 2  | 2  | 2  | 2.32%  |
| c(-)-Tiva2 | Catenin beta-1 OS=Homo sapiens GN=CTNNB1 PE=1 SV=1                                                           | CTNB1_HUMAN  | 85,497.00  | 100.00% | 2  | 2  | 2  | 3.33%  |
| c(-)-Tiva2 | F-actin-capping protein subunit alpha-2 OS=Homo sapiens GN=CAPZA2 PE=1 SV=3                                  | CAZA2_HUMAN  | 32,949.20  | 100.00% | 6  | 6  | 6  | 39.50% |
| c(-)-Tiva2 | Nucleophosmin OS=Homo sapiens GN=NPM1 PE=1 SV=2                                                              | NPM_HUMAN    | 32,575.50  | 100.00% | 6  | 7  | 8  | 37.10% |
| c(-)-Tiva2 | Desmoplakin OS=Homo sapiens GN=DSP PE=1 SV=3                                                                 | DESP_HUMAN   | 331,781.40 | 100.00% | 3  | 3  | 3  | 1.74%  |
| c(-)-Tiva2 | Importin-7 OS=Homo sapiens GN=IPO7 PE=1 SV=1                                                                 | IPO7_HUMAN   | 119,519.50 | 71.60%  | 1  | 1  | 1  | 1.25%  |
| c(-)-Tiva2 | Nuclear pore complex protein Nup133 OS=Homo sapiens GN=NUP133 PE=1 SV=2                                      | NU133_HUMAN  | 128,984.00 | 99.90%  | 1  | 1  | 1  | 1.38%  |
| c(-)-Tiva2 | Probable ATP-dependent RNA helicase DDX5 OS=Homo sapiens GN=DDX5 PE=1 SV=1                                   | DDX5_HUMAN   | 69,149.70  | 100.00% | 4  | 4  | 4  | 7.49%  |
| c(-)-Tiva2 | Mitochondrial inner membrane protein OS=Homo sapiens GN=IMMT PE=1 SV=1                                       | IMMT_HUMAN   | 83,679.00  | 99.90%  | 1  | 1  | 1  | 2.51%  |
| c(-)-Tiva2 | RNA-binding protein Raly OS=Homo sapiens GN=RALY PE=1 SV=1                                                   | RALY_HUMAN   | 32,463.90  | 100.00% | 3  | 3  | 3  | 10.50% |
| c(-)-Tiva2 | Cyclin-T1 OS=Homo sapiens GN=CCNT1 PE=1 SV=1                                                                 | CCNT1_HUMAN  | 80,684.90  | 81.60%  | 1  | 1  | 1  | 1.65%  |
| c(-)-Tiva2 | 40S ribosomal protein S2 OS=Homo sapiens GN=RP52 PE=1 SV=2                                                   | RS2_HUMAN    | 31,325.20  | 77.90%  | 1  | 1  | 1  | 3.75%  |
| c(-)-Tiva2 | Annexin A1 OS=Homo sapiens GN=ANXA1 PE=1 SV=2                                                                | ANXA1_HUMAN  | 38,715.90  | 95.00%  | 1  | 1  | 1  | 3.18%  |
| c(-)-Tiva2 | 60S ribosomal protein L7 OS=Homo sapiens GN=RP17 PE=1 SV=1                                                   | RL7_HUMAN    | 29,227.70  | 100.00% | 2  | 2  | 2  | 10.10% |
| c(-)-Tiva2 | Sperm-specific antigen 2 OS=Homo sapiens GN=SSFA2 PE=1 SV=3                                                  | SSFA2_HUMAN  | 138,386.10 | 100.00% | 1  | 1  | 1  | 1.11%  |
| c(-)-Tiva2 | AP-2 complex subunit beta OS=Homo sapiens GN=AP2B1 PE=1 SV=1                                                 | AP2B1_HUMAN  | 104,555.30 | 68.50%  | 1  | 1  | 1  | 1.17%  |
| c(-)-Tiva2 | Protein flightless-1 homolog OS=Homo sapiens GN=FLII PE=1 SV=2                                               | FLII_HUMAN   | 144,755.40 | 100.00% | 7  | 7  | 7  | 6.78%  |
| c(-)-Tiva2 | Galectin-3-binding protein OS=Homo sapiens GN=LGALS3BP PE=1 SV=1                                             | LG3BP_HUMAN  | 65,332.10  | 100.00% | 5  | 5  | 5  | 11.60% |
| c(-)-Tiva2 | Probable 2-oxoglutarate dehydrogenase E1 component DHTKD1, mitochondrial OS=Homo sapiens GN=DHTKD1 PE=2 SV=2 | DHTK1_HUMAN  | 103,078.40 | 35.50%  | 0  | 0  | 0  | 0.00%  |
| c(-)-Tiva2 | Zinc finger protein 18 OS=Homo sapiens GN=ZNF18 PE=2 SV=2                                                    | ZNF18_HUMAN  | 62,288.30  | 62.00%  | 1  | 1  | 1  | 2.37%  |

|            |                                                                                                                                                     |              |            |         |     |     |     |        |
|------------|-----------------------------------------------------------------------------------------------------------------------------------------------------|--------------|------------|---------|-----|-----|-----|--------|
| c(-)-Tiva2 | F-actin-capping protein subunit beta OS=Homo sapiens GN=CAPZB PE=1 SV=4                                                                             | CAPZB_HUMAN  | 31,351.60  | 100.00% | 9   | 10  | 10  | 34.70% |
| c(-)-Tiva2 | Heterogeneous nuclear ribonucleoprotein L OS=Homo sapiens GN=HNRNPL PE=1 SV=2                                                                       | HNRPL_HUMAN  | 64,132.80  | 100.00% | 6   | 8   | 9   | 22.40% |
| c(-)-Tiva2 | Catenin alpha-1 OS=Homo sapiens GN=CTNNA1 PE=1 SV=1                                                                                                 | CTNA1_HUMAN  | 100,072.90 | 100.00% | 7   | 7   | 7   | 12.00% |
| c(-)-Tiva2 | Actin-related protein 2/3 complex subunit 4 OS=Homo sapiens GN=ARPC4 PE=1 SV=3                                                                      | ARPC4_HUMAN  | 19,667.40  | 100.00% | 3   | 3   | 4   | 17.90% |
| c(-)-Tiva2 | Spectrin beta chain, non-erythrocytic 1 OS=Homo sapiens GN=SPBTB1 PE=1 SV=2                                                                         | SPBTB1_HUMAN | 274,613.40 | 100.00% | 131 | 197 | 232 | 58.10% |
| c(-)-Tiva2 | E3 SUMO-protein ligase RanBP2 OS=Homo sapiens GN=RANBP2 PE=1 SV=2                                                                                   | RBP2_HUMAN   | 358,198.20 | 100.00% | 6   | 6   | 6   | 2.48%  |
| c(-)-Tiva2 | Tubulin alpha-1B chain OS=Homo sapiens GN=TUBA1B PE=1 SV=1                                                                                          | TBA1B_HUMAN  | 50,151.70  | 95.00%  | 1   | 1   | 1   | 2.88%  |
| c(-)-Tiva2 | Myoferlin OS=Homo sapiens GN=MYOF PE=1 SV=1                                                                                                         | MYOF_HUMAN   | 234,715.60 | 100.00% | 3   | 3   | 3   | 1.80%  |
| c(-)-Tiva2 | Laminin subunit gamma-1 OS=Homo sapiens GN=LAMC1 PE=1 SV=3                                                                                          | LAMC1_HUMAN  | 177,601.30 | 100.00% | 2   | 2   | 2   | 1.93%  |
| c(-)-Tiva2 | 40S ribosomal protein S3 OS=Homo sapiens GN=RP53 PE=1 SV=2                                                                                          | RS3_HUMAN    | 26,688.60  | 100.00% | 5   | 5   | 6   | 24.30% |
| c(-)-Tiva2 | Heat shock 70 kDa protein 1-like OS=Homo sapiens GN=HSPA1L PE=1 SV=2                                                                                | HS71L_HUMAN  | 70,377.10  | 100.00% | 4   | 4   | 4   | 8.58%  |
| c(-)-Tiva2 | AP-2 complex subunit alpha-1 OS=Homo sapiens GN=AP2A1 PE=1 SV=3                                                                                     | AP2A1_HUMAN  | 107,548.70 | 48.60%  | 1   | 1   | 1   | 1.54%  |
| c(-)-Tiva2 | Collagen alpha-1(VII) chain OS=Homo sapiens GN=COL7A1 PE=1 SV=2                                                                                     | COTA1_HUMAN  | 295,217.50 | 100.00% | 5   | 5   | 5   | 2.48%  |
| c(-)-Tiva2 | Mucin-1 OS=Homo sapiens GN=MUC1 PE=1 SV=3                                                                                                           | MUC1_HUMAN   | 122,098.60 | 74.30%  | 1   | 1   | 1   | 0.88%  |
| c(-)-Tiva2 | Methionine-tRNA ligase, cytoplasmic OS=Homo sapiens GN=MARS PE=1 SV=2                                                                               | SYMC_HUMAN   | 101,117.50 | 13.70%  | 0   | 0   | 0   | 0.00%  |
| c(-)-Tiva2 | Trifunctional enzyme subunit beta, mitochondrial OS=Homo sapiens GN=HADHB PE=1 SV=3                                                                 | ECHB_HUMAN   | 51,296.00  | 100.00% | 2   | 2   | 2   | 6.96%  |
| c(-)-Tiva2 | Heat shock cognate 71 kDa protein OS=Homo sapiens GN=HSPA8 PE=1 SV=1                                                                                | HSP7C_HUMAN  | 70,899.80  | 100.00% | 6   | 6   | 6   | 12.70% |
| c(-)-Tiva2 | Scaffold attachment factor B1 OS=Homo sapiens GN=SAFB PE=1 SV=4                                                                                     | SAFB1_HUMAN  | 102,642.80 | 95.00%  | 1   | 1   | 1   | 1.64%  |
| c(-)-Tiva2 | Coronin-1C OS=Homo sapiens GN=CORO1C PE=1 SV=1                                                                                                      | COR1C_HUMAN  | 53,250.30  | 100.00% | 17  | 20  | 20  | 32.90% |
| c(-)-Tiva2 | Actin-binding LIM protein 1 OS=Homo sapiens GN=ABLIM1 PE=1 SV=3                                                                                     | ABLIM1_HUMAN | 87,689.00  | 100.00% | 1   | 1   | 1   | 1.80%  |
| c(-)-Tiva2 | Heterogeneous nuclear ribonucleoprotein H OS=Homo sapiens GN=HNRNPH1 PE=1 SV=4                                                                      | HNRH1_HUMAN  | 49,229.80  | 100.00% | 7   | 8   | 8   | 22.90% |
| c(-)-Tiva2 | sp Q13813 SPTA2_HUMAN Spectrin alpha chain, brain OS=Homo sapiens GN=SPTAN1 PE=1 SV=1                                                               | SPTA2_HUMAN  | 0          | 100.00% | 159 | 215 | 229 | 0.00%  |
| c(-)-Tiva2 | Dihydrolipoyllysine-residue acetyltransferase component of pyruvate dehydrogenase complex, mitochondrial OS=Homo sapiens GN=PDHFB PE=1 SV=1         | ODP2_HUMAN   | 68,997.20  | 100.00% | 4   | 4   | 4   | 8.50%  |
| c(-)-Tiva2 | Nuclear pore complex protein Nup155 OS=Homo sapiens GN=NUP155 PE=1 SV=1                                                                             | NUP155_HUMAN | 155,203.00 | 28.40%  | 0   | 0   | 0   | 0.00%  |
| c(-)-Tiva2 | Histone-binding protein RBBP4 OS=Homo sapiens GN=RBBP4 PE=1 SV=3                                                                                    | RBBP4_HUMAN  | 47,655.80  | 66.20%  | 1   | 1   | 1   | 1.88%  |
| c(-)-Tiva2 | 40S ribosomal protein S19 OS=Homo sapiens GN=RP519 PE=1 SV=2                                                                                        | RS19_HUMAN   | 16,060.50  | 100.00% | 1   | 1   | 1   | 10.30% |
| c(-)-Tiva2 | Heterogeneous nuclear ribonucleoprotein K OS=Homo sapiens GN=HNRNPK PE=1 SV=1                                                                       | HNRPK_HUMAN  | 50,978.50  | 100.00% | 9   | 10  | 11  | 25.10% |
| c(-)-Tiva2 | Heterogeneous nuclear ribonucleoprotein U OS=Homo sapiens GN=HNRNPU PE=1 SV=6                                                                       | HNRPU_HUMAN  | 90,585.20  | 100.00% | 18  | 23  | 29  | 27.60% |
| c(-)-Tiva2 | Spectrin beta chain, erythrocytic OS=Homo sapiens GN=SPTB PE=1 SV=5                                                                                 | SPTB1_HUMAN  | 246,471.60 | 100.00% | 5   | 9   | 9   | 2.53%  |
| c(-)-Tiva2 | Keratin, type I cytoskeletal 14 OS=Homo sapiens GN=KRT14 PE=1 SV=4                                                                                  | K1C14_HUMAN  | 51,562.50  | 100.00% | 2   | 2   | 2   | 4.66%  |
| c(-)-Tiva2 | Ras-related protein Rab-10 OS=Homo sapiens GN=RAB10 PE=1 SV=1                                                                                       | RAB10_HUMAN  | 22,542.10  | 83.30%  | 1   | 1   | 1   | 5.50%  |
| c(-)-Tiva2 | Unconventional myosin-Ib OS=Homo sapiens GN=MYO1B PE=1 SV=3                                                                                         | MYO1B_HUMAN  | 131,990.70 | 100.00% | 23  | 27  | 28  | 24.70% |
| c(-)-Tiva2 | Pleckstrin homology domain-containing family G member 3 OS=Homo sapiens GN=PLEKHG3 PE=1 SV=1                                                        | PKHG3_HUMAN  | 134,413.00 | 100.00% | 3   | 3   | 3   | 4.10%  |
| c(-)-Tiva2 | rRNA 2'-O-methyltransferase fibrillarin OS=Homo sapiens GN=FBP PE=1 SV=2                                                                            | FBRL_HUMAN   | 33,784.10  | 8.80%   | 0   | 0   | 0   | 0.00%  |
| c(-)-Tiva2 | Keratin, type II cuticular Hb3 OS=Homo sapiens GN=KRT83 PE=1 SV=2                                                                                   | KRT83_HUMAN  | 54,194.90  | 83.90%  | 1   | 1   | 1   | 1.62%  |
| c(-)-Tiva2 | Tropomyosin alpha-1 chain OS=Homo sapiens GN=TPM1 PE=1 SV=2                                                                                         | TPM1_HUMAN   | 32,710.00  | 100.00% | 3   | 4   | 4   | 12.30% |
| c(-)-Tiva2 | Inverted formin-2 OS=Homo sapiens GN=INF2 PE=1 SV=2                                                                                                 | INF2_HUMAN   | 135,627.30 | 87.40%  | 1   | 1   | 1   | 0.96%  |
| c(-)-Tiva2 | 26S proteasome non-ATPase regulatory subunit 1 OS=Homo sapiens GN=PSMD1 PE=1 SV=2                                                                   | PSMD1_HUMAN  | 105,839.20 | 52.70%  | 0   | 0   | 0   | 0.00%  |
| c(-)-Tiva2 | NF-kappa-B-activating protein OS=Homo sapiens GN=NKAP PE=1 SV=1                                                                                     | NKAP_HUMAN   | 47,140.40  | 53.60%  | 1   | 1   | 1   | 2.41%  |
| c(-)-Tiva2 | Calnexin OS=Homo sapiens GN=CANX PE=1 SV=2                                                                                                          | CALX_HUMAN   | 67,570.20  | 100.00% | 2   | 2   | 2   | 3.89%  |
| c(-)-Tiva2 | Glycogen synthase kinase-3 alpha OS=Homo sapiens GN=GSK3A PE=1 SV=2                                                                                 | GSK3A_HUMAN  | 50,981.90  | 100.00% | 4   | 6   | 7   | 16.40% |
| c(-)-Tiva2 | Pre-mRNA-processing factor 19 OS=Homo sapiens GN=PRPF19 PE=1 SV=1                                                                                   | PRP19_HUMAN  | 55,181.30  | 100.00% | 1   | 1   | 1   | 2.98%  |
| c(-)-Tiva2 | Trifunctional enzyme subunit alpha, mitochondrial OS=Homo sapiens GN=HADHA PE=1 SV=2                                                                | ECHA_HUMAN   | 83,001.90  | 100.00% | 6   | 6   | 7   | 10.20% |
| c(-)-Tiva2 | Dihydrolipoyllysine-residue succinyltransferase component of 2-oxoglutarate dehydrogenase complex, mitochondrial OS=Homo sapiens GN=PDHFB PE=1 SV=1 | ODO2_HUMAN   | 48,755.20  | 100.00% | 2   | 2   | 2   | 5.74%  |
| c(-)-Tiva2 | Heterogeneous nuclear ribonucleoprotein U-like protein 1 OS=Homo sapiens GN=HNRNPUL1 PE=1 SV=2                                                      | HNRL1_HUMAN  | 95,739.70  | 100.00% | 2   | 2   | 2   | 3.39%  |
| c(-)-Tiva2 | Tropomodulin-3 OS=Homo sapiens GN=TMOD3 PE=1 SV=1                                                                                                   | TMOD3_HUMAN  | 39,596.10  | 100.00% | 9   | 11  | 11  | 38.10% |
| c(-)-Tiva2 | Transcription intermediary factor 1-beta OS=Homo sapiens GN=TRIM28 PE=1 SV=5                                                                        | TIF1B_HUMAN  | 88,549.00  | 99.80%  | 1   | 1   | 1   | 1.08%  |
| c(-)-Tiva2 | Histone deacetylase 6 OS=Homo sapiens GN=HDAC6 PE=1 SV=2                                                                                            | HDAC6_HUMAN  | 131,418.70 | 100.00% | 4   | 4   | 4   | 5.19%  |
| c(-)-Tiva2 | Transportin-1 OS=Homo sapiens GN=TNPO1 PE=1 SV=2                                                                                                    | TNPO1_HUMAN  | 102,358.80 | 37.70%  | 0   | 0   | 0   | 0.00%  |
| c(-)-Tiva2 | Survillin OS=Homo sapiens GN=SVIL PE=1 SV=2                                                                                                         | SVIL_HUMAN   | 247,747.10 | 100.00% | 32  | 36  | 39  | 21.10% |
| c(-)-Tiva2 | F-actin-capping protein subunit alpha-1 OS=Homo sapiens GN=CAPZA1 PE=1 SV=3                                                                         | CAZAI1_HUMAN | 32,923.20  | 100.00% | 5   | 6   | 6   | 29.70% |
| c(-)-Tiva2 | Nucleolar RNA helicase 2 OS=Homo sapiens GN=DDX21 PE=1 SV=5                                                                                         | DDX21_HUMAN  | 87,346.00  | 99.70%  | 1   | 1   | 1   | 1.92%  |
| c(-)-Tiva2 | Unconventional myosin-Ia OS=Homo sapiens GN=MYO1A PE=1 SV=1                                                                                         | MYO1A_HUMAN  | 118,404.40 | 100.00% | 3   | 3   | 3   | 3.64%  |
| c(-)-Tiva2 | SH3 domain-binding glutamic acid-rich-like protein 2 OS=Homo sapiens GN=SH3BGR12 PE=1 SV=2                                                          | SH3L2_HUMAN  | 12,326.30  | 98.80%  | 0   | 0   | 0   | 0.00%  |
| c(-)-Tiva2 | Histone H2A type 1-A OS=Homo sapiens GN=HIST1H2AA PE=1 SV=3                                                                                         | H2A1A_HUMAN  | 14,234.20  | 63.20%  | 1   | 1   | 1   | 6.87%  |
| c(-)-Tiva2 | Coiled-coil domain-containing protein 73 OS=Homo sapiens GN=CCDC73 PE=2 SV=2                                                                        | CCD73_HUMAN  | 124,157.50 | 6.50%   | 0   | 0   | 0   | 0.00%  |
| c(-)-Tiva2 | 60S ribosomal protein L5 OS=Homo sapiens GN=RPL5 PE=1 SV=3                                                                                          | RL5_HUMAN    | 34,363.50  | 99.80%  | 1   | 1   | 1   | 3.37%  |
| c(-)-Tiva2 | 60S ribosomal protein L6 OS=Homo sapiens GN=RPL6 PE=1 SV=3                                                                                          | RL6_HUMAN    | 32,729.30  | 84.60%  | 1   | 1   | 1   | 6.94%  |
| c(-)-Tiva2 | Transketolase-like protein 1 OS=Homo sapiens GN=TKTL1 PE=1 SV=2                                                                                     | TKTL1_HUMAN  | 65,333.90  | 79.20%  | 1   | 1   | 1   | 5.03%  |
| c(-)-Tiva2 | Serine/threonine-protein phosphatase PP1-alpha catalytic subunit OS=Homo sapiens GN=PPP1CA PE=1 SV=1                                                | PP1A_HUMAN   | 37,513.90  | 100.00% | 7   | 7   | 7   | 28.80% |
| c(-)-Tiva2 | Interleukin enhancer-binding factor 3 OS=Homo sapiens GN=ILF3 PE=1 SV=3                                                                             | ILF3_HUMAN   | 95,338.90  | 100.00% | 10  | 11  | 12  | 19.10% |
| c(-)-Tiva2 | Dolichyl-diphosphooligosaccharide--protein glycosyltransferase subunit 1 OS=Homo sapiens GN=RPN1 PE=1 SV=1                                          | RPN1_HUMAN   | 68,571.00  | 99.90%  | 1   | 1   | 1   | 1.81%  |
| c(-)-Tiva2 | Solute carrier family 2, facilitated glucose transporter member 1 OS=Homo sapiens GN=SLC2A1 PE=1 SV=2                                               | GTR1_HUMAN   | 54,085.30  | 100.00% | 2   | 2   | 2   | 5.49%  |
| c(-)-Tiva2 | Basigin OS=Homo sapiens GN=BSG PE=1 SV=2                                                                                                            | BASI_HUMAN   | 42,199.70  | 89.00%  | 1   | 1   | 1   | 4.68%  |
| c(-)-Tiva2 | Erlin-2 OS=Homo sapiens GN=ERLIN2 PE=1 SV=1                                                                                                         | ERLN2_HUMAN  | 37,840.40  | 92.50%  | 1   | 1   | 1   | 3.54%  |
| c(-)-Tiva2 | Twinfilin-1 OS=Homo sapiens GN=TWFI1 PE=1 SV=3                                                                                                      | TWFI1_HUMAN  | 40,284.20  | 100.00% | 2   | 3   | 3   | 9.14%  |
| c(-)-Tiva2 | Pre-mRNA branch site protein p14 OS=Homo sapiens GN=SF3B14 PE=1 SV=1                                                                                | PM14_HUMAN   | 14,585.60  | 95.00%  | 1   | 1   | 1   | 9.60%  |
| c(-)-Tiva2 | Actin-related protein 2/3 complex subunit 3 OS=Homo sapiens GN=ARPC3 PE=1 SV=3                                                                      | ARPC3_HUMAN  | 20,547.80  | 59.10%  | 1   | 1   | 1   | 8.99%  |
| c(-)-Tiva2 | Katanin p60 ATPase-containing subunit A-like 2 OS=Homo sapiens GN=KATNAL2 PE=1 SV=3                                                                 | KATL2_HUMAN  | 61,255.10  | 79.80%  | 1   | 1   | 1   | 2.23%  |
| c(-)-Tiva2 | Ankyrin-3 OS=Homo sapiens GN=ANK3 PE=1 SV=3                                                                                                         | ANK3_HUMAN   | 480,407.20 | 5.50%   | 0   | 0   | 0   | 0.00%  |
| c(-)-Tiva2 | Putative beta-actin-like protein 3 OS=Homo sapiens GN=POTEKP PE=5 SV=1                                                                              | ACTBM_HUMAN  | 42,017.20  | 100.00% | 2   | 3   | 3   | 6.40%  |
| c(-)-Tiva2 | T-complex protein 1 subunit eta OS=Homo sapiens GN=CTCF PE=1 SV=2                                                                                   | TCPH_HUMAN   | 59,367.80  | 49.10%  | 0   | 0   | 0   | 0.00%  |
| c(-)-Tiva2 | Cathepsin D OS=Homo sapiens GN=CTSD PE=1 SV=1                                                                                                       | CATD_HUMAN   | 44,553.00  | 100.00% | 2   | 2   | 2   | 7.04%  |
| c(-)-Tiva2 | Serine/arginine-rich splicing factor 1 OS=Homo sapiens GN=SRSF1 PE=1 SV=2                                                                           | SRSF1_HUMAN  | 27,745.10  | 100.00% | 4   | 4   | 4   | 16.50% |
| c(-)-Tiva2 | Absent in melanoma 1 protein OS=Homo sapiens GN=AIM1 PE=1 SV=3                                                                                      | AIM1_HUMAN   | 188,677.20 | 95.00%  | 1   | 1   | 1   | 0.70%  |
| c(-)-Tiva2 | POTE ankyrin domain family member E OS=Homo sapiens GN=POTEE PE=1 SV=3                                                                              | POTEE_HUMAN  | 121,366.20 | 91.20%  | 1   | 1   | 1   | 2.60%  |
| c(-)-Tiva2 | Protein FAM83H OS=Homo sapiens GN=FAM83H PE=1 SV=3                                                                                                  | FAB3H_HUMAN  | 127,123.90 | 100.00% | 2   | 2   | 2   | 2.88%  |
| c(-)-Tiva2 | Double-stranded RNA-specific adenosine deaminase OS=Homo sapiens GN=ADAR PE=1 SV=4                                                                  | DSRAD_HUMAN  | 136,070.00 | 100.00% | 2   | 2   | 3   | 2.69%  |
| c(-)-Tiva2 | Structural maintenance of chromosomes protein 3 OS=Homo sapiens GN=SMC3 PE=1 SV=2                                                                   | SMC3_HUMAN   | 141,547.10 | 6.70%   | 0   | 0   | 0   | 0.00%  |
| c(-)-Tiva2 | DnaJ homolog subfamily C member 10 OS=Homo sapiens GN=DNAJC10 PE=1 SV=2                                                                             | DIC10_HUMAN  | 91,082.40  | 51.10%  | 1   | 1   | 1   | 1.26%  |
| c(-)-Tiva2 | Caveolin-1 OS=Homo sapiens GN=CAV1 PE=1 SV=4                                                                                                        | CAV1_HUMAN   | 20,472.20  | 100.00% | 4   | 4   | 4   | 30.90% |
| c(-)-Tiva2 | Putative heat shock protein HSP 90-beta-3 OS=Homo sapiens GN=HSP90AB3 PE=5 SV=1                                                                     | H90B3_HUMAN  | 68,326.50  | 79.50%  | 1   | 1   | 1   | 1.84%  |
| c(-)-Tiva2 | Myosin phosphatase Rho-interacting protein OS=Homo sapiens GN=MPRIIP PE=1 SV=3                                                                      | MPRIIP_HUMAN | 116,535.50 | 100.00% | 4   | 4   | 4   | 5.66%  |
| c(-)-Tiva2 | Heterogeneous nuclear ribonucleoprotein A3 OS=Homo sapiens GN=HNRNP3 PE=1 SV=2                                                                      | ROA3_HUMAN   | 39,595.10  | 100.00% | 5   | 5   | 5   | 20.10% |
| c(-)-Tiva2 | Adseverin OS=Homo sapiens GN=SCIN PE=1 SV=4                                                                                                         | ADSV_HUMAN   | 80,490.20  | 100.00% | 1   | 1   | 1   | 2.10%  |
| c(-)-Tiva2 | ELAV-like protein 1 OS=Homo sapiens GN=ELAVL1 PE=1 SV=2                                                                                             | ELAV1_HUMAN  | 36,092.60  | 100.00% | 7   | 7   | 8   | 31.60% |
| c(-)-Tiva2 | Apolipoprotein A-I OS=Homo sapiens GN=APOA1 PE=1 SV=1                                                                                               | APOA1_HUMAN  | 30,778.50  | 94.20%  | 1   | 1   | 1   | 4.12%  |
| c(-)-Tiva2 | 40S ribosomal protein S3a OS=Homo sapiens GN=RP53A PE=1 SV=2                                                                                        | RS3A_HUMAN   | 29,945.30  | 46.90%  | 0   | 0   | 0   | 0.00%  |
| c(-)-Tiva2 | Small nuclear ribonucleoprotein Sm D2 OS=Homo sapiens GN=SNRPD2 PE=1 SV=1                                                                           | SMD2_HUMAN   | 13,527.10  | 90.70%  | 1   | 1   | 1   | 8.47%  |
| c(-)-Tiva2 | Coiled-coil domain-containing protein 164 OS=Homo sapiens GN=CCDC164 PE=2 SV=2                                                                      | CC164_HUMAN  | 87,137.30  | 54.70%  | 1   | 1   | 1   | 3.11%  |
| c(-)-Tiva2 | Synaptosomal-associated protein 23 OS=Homo sapiens GN=SNAP23 PE=1 SV=1                                                                              | SNP23_HUMAN  | 23,354.80  | 100.00% | 2   | 2   | 2   | 14.70% |
| c(-)-Tiva2 | Neuroblast differentiation-associated protein AHNAK OS=Homo sapiens GN=AHNAK PE=1 SV=2                                                              | AHNK_HUMAN   | 629,104.40 | 100.00% | 11  | 11  | 11  | 2.99%  |
| c(-)-Tiva2 | Thioredoxin-dependent peroxide reductase, mitochondrial OS=Homo sapiens GN=PRDX3 PE=1 SV=3                                                          | PRDX3_HUMAN  | 27,692.70  | 100.00% | 4   | 4   | 4   | 26.60% |
| c(-)-Tiva2 | Unconventional myosin-Vc OS=Homo sapiens GN=MYOSC PE=1 SV=2                                                                                         | MYOSC_HUMAN  | 202,816.50 | 100.00% | 3   | 3   | 3   | 2.07%  |
| c(-)-Tiva2 | 60S ribosomal protein L30 OS=Homo sapiens GN=RPL30 PE=1 SV=2                                                                                        | RL30_HUMAN   | 12,784.70  | 99.50%  | 1   | 1   | 1   | 10.40% |
| c(-)-Tiva2 | Twinfilin-2 OS=Homo sapiens GN=TWIF2 PE=1 SV=2                                                                                                      | TWIF2_HUMAN  | 39,548.90  | 87.90%  | 1   | 1   | 1   | 4.87%  |
| c(-)-Tiva2 | 60S ribosomal protein L11 OS=Homo sapiens GN=RPL11 PE=1 SV=2                                                                                        | RL11_HUMAN   | 20,253.20  | 95.00%  | 1   | 1   | 1   | 7.87%  |
| c(-)-Tiva2 | Serrate RNA effector molecule homolog OS=Homo sapiens GN=SRRT PE=1 SV=1                                                                             | SRRT_HUMAN   | 100,669.70 | 21.90%  | 0   | 0   | 0   | 0.00%  |
| c(-)-Tiva2 | Epithelial cell adhesion molecule OS=Homo sapiens GN=EPCAM PE=1 SV=2                                                                                | EPCAM_HUMAN  | 34,932.30  | 100.00% | 2   | 2   | 2   | 8.60%  |
| c(-)-Tiva2 | Stress-70 protein, mitochondrial OS=Homo sapiens GN=HSPA9 PE=1 SV=2                                                                                 | GRP75_HUMAN  | 73,681.30  | 100.00% | 3   | 3   | 5   | 6.63%  |
| c(-)-Tiva2 | Erlin-1 OS=Homo sapiens GN=ERLIN1 PE=1 SV=1                                                                                                         | ERLN1_HUMAN  | 38,926.70  | 82.20%  | 1   | 1   | 1   | 3.47%  |
| c(-)-Tiva2 | U5 small nuclear ribonucleoprotein 200 kDa helicase OS=Homo sapiens GN=SNRNP200 PE=1 SV=2                                                           | US20_HUMAN   | 244,513.80 | 100.00% | 14  | 15  | 16  | 8.75%  |
| c(-)-Tiva2 | 60S ribosomal protein L18 OS=Homo sapiens GN=RL18 PE=1 SV=2                                                                                         | RL18_HUMAN   | 21,635.20  | 100.00% | 2   | 2   | 2   | 12.80% |
| c(-)-Tiva2 | Pyruvate kinase isozymes M1/M2 OS=Homo sapiens GN=PKM PE=1 SV=4                                                                                     | KPYM_HUMAN   | 57,937.50  | 99.80%  | 1   | 1   | 1   | 2.45%  |
| c(-)-Tiva2 | Lamin-B1 OS=Homo sapiens GN=LMBN1 PE=1 SV=2                                                                                                         | LMBN1_HUMAN  | 66,409.60  | 99.90%  | 1   | 1   | 1   | 1.88%  |
| c(-)-Tiva2 | Keratin, type I cytoskeletal 13 OS=Homo sapiens GN=KRT13 PE=1 SV=4                                                                                  | K1C13_HUMAN  | 49,589.30  | 100.00% | 3   | 3   | 3   | 8.52%  |
| c(-)-Tiva2 | Mitochondrial Rho GTPase 2 OS=Homo sapiens GN=RHOT2 PE=1 SV=2                                                                                       | MIRO2_HUMAN  | 68,117.60  | 94.70%  | 1   | 1   | 1   | 3.24%  |
| c(-)-Tiva2 | Actin-related protein 2/3 complex subunit 1B OS=Homo sapiens GN=ARPC1B PE=1 SV=3                                                                    | ARC1B_HUMAN  | 40,949.80  | 100.00% | 3   | 3   | 3   | 14.80% |
| c(-)-Tiva2 | Very long-chain specific acyl-CoA dehydrogenase, mitochondrial OS=Homo sapiens GN=ACADVL PE=1 SV=1                                                  | ACADV_HUMAN  | 70,391.60  | 29.60%  | 0   | 0   | 0   | 0.00%  |
| c(-)-Tiva2 | 40S ribosomal protein S24 OS=Homo sapiens GN=RP524 PE=1 SV=1                                                                                        | RS24_HUMAN   | 15,423.80  | 86.30%  | 1   | 1   | 1   | 11.30% |
| c(-)-Tiva2 | Keratin, type II cuticular Hb2 OS=Homo sapiens GN=KRT82 PE=1 SV=3                                                                                   | KRT82_HUMAN  | 56,653.40  | 100.00% | 1   | 1   | 1   | 1.95%  |
| c(-)-Tiva2 | Plectin OS=Homo sapiens GN=PLEC PE=1 SV=3                                                                                                           | PLEC_HUMAN   | 531,783.90 | 100.00% | 185 | 225 | 232 | 42.50% |
| c(-)-Tiva2 | Nuclear cap-binding protein subunit 1 OS=Homo sapiens GN=NCBP1 PE=1 SV=1                                                                            | NCBP1_HUMAN  | 91,841.10  | 54.10%  | 1   | 1   | 1   | 1.39%  |

|            |                                                                                                     |              |            |         |    |    |    |        |
|------------|-----------------------------------------------------------------------------------------------------|--------------|------------|---------|----|----|----|--------|
| c(-)-Tiva2 | Endoplasmic OS=Homo sapiens GN=HSP90B1 PE=1 SV=1                                                    | ENPL_HUMAN   | 92,471.70  | 100.00% | 2  | 2  | 2  | 4.11%  |
| c(-)-Tiva2 | Elongation factor 1-gamma OS=Homo sapiens GN=EEF1G PE=1 SV=3                                        | EF1G_HUMAN   | 50,119.40  | 100.00% | 2  | 2  | 2  | 5.03%  |
| c(-)-Tiva2 | Ribosome-binding protein 1 OS=Homo sapiens GN=RRBP1 PE=1 SV=4                                       | RRBP1_HUMAN  | 152,470.60 | 99.90%  | 1  | 1  | 1  | 0.92%  |
| c(-)-Tiva2 | Putative heat shock protein HSP 90-beta 2 OS=Homo sapiens GN=HSP90AB2P PE=1 SV=2                    | H90B2_HUMAN  | 44,350.20  | 78.30%  | 1  | 1  | 1  | 2.36%  |
| c(-)-Tiva2 | Heterogeneous nuclear ribonucleoproteins A2/B1 OS=Homo sapiens GN=HNRNPA2B1 PE=1 SV=2               | ROA2_HUMAN   | 37,430.30  | 100.00% | 13 | 16 | 18 | 47.90% |
| c(-)-Tiva2 | 2-oxoglutarate dehydrogenase, mitochondrial OS=Homo sapiens GN=OGDH PE=1 SV=3                       | ODO1_HUMAN   | 115,936.70 | 98.30%  | 1  | 1  | 1  | 2.15%  |
| c(-)-Tiva2 | Keratin, type II cytoskeletal 79 OS=Homo sapiens GN=KRT79 PE=1 SV=2                                 | K2C79_HUMAN  | 57,836.00  | 95.00%  | 1  | 1  | 1  | 1.87%  |
| c(-)-Tiva2 | Elongation factor 1-alpha 1 OS=Homo sapiens GN=EEF1A1 PE=1 SV=1                                     | EF1A1_HUMAN  | 50,141.20  | 100.00% | 3  | 3  | 3  | 10.20% |
| c(-)-Tiva2 | Integrin beta-4 OS=Homo sapiens GN=ITGB4 PE=1 SV=5                                                  | ITB4_HUMAN   | 202,166.70 | 100.00% | 5  | 5  | 5  | 3.68%  |
| c(-)-Tiva2 | SWI/SNF complex subunit SMARCC2 OS=Homo sapiens GN=SMARCC2 PE=1 SV=1                                | SMRC2_HUMAN  | 132,880.40 | 74.10%  | 1  | 1  | 1  | 1.73%  |
| c(-)-Tiva2 | Coiled-coil domain-containing protein 91 OS=Homo sapiens GN=CCDC91 PE=1 SV=2                        | CCD91_HUMAN  | 49,971.80  | 6.80%   | 0  | 0  | 0  | 0.00%  |
| c(-)-Tiva2 | Matrin-3 OS=Homo sapiens GN=MATR3 PE=1 SV=2                                                         | MATR3_HUMAN  | 94,626.70  | 100.00% | 7  | 7  | 7  | 11.60% |
| c(-)-Tiva2 | RuvB-like 2 OS=Homo sapiens GN=RUVBL2 PE=1 SV=3                                                     | RUVB2_HUMAN  | 51,158.10  | 100.00% | 5  | 5  | 5  | 15.60% |
| c(-)-Tiva2 | Keratin, type II cytoskeletal 4 OS=Homo sapiens GN=KRT4 PE=1 SV=4                                   | K2C4_HUMAN   | 57,286.10  | 100.00% | 11 | 11 | 11 | 22.70% |
| c(-)-Tiva2 | Actin-related protein 2/3 complex subunit 1A OS=Homo sapiens GN=ARPC1A PE=1 SV=2                    | ARC1A_HUMAN  | 41,569.20  | 99.80%  | 1  | 1  | 1  | 2.70%  |
| c(-)-Tiva2 | Myosin light chain 1/3, skeletal muscle isoform OS=Homo sapiens GN=MYL1 PE=1 SV=3                   | MYL1_HUMAN   | 21,145.60  | 94.60%  | 1  | 1  | 1  | 8.25%  |
| c(-)-Tiva2 | Neurabin-2 OS=Homo sapiens GN=PPP1R9B PE=1 SV=2                                                     | NEB2_HUMAN   | 89,192.20  | 99.90%  | 1  | 1  | 1  | 2.09%  |
| c(-)-Tiva2 | Isoleucine-tRNA ligase, cytoplasmic OS=Homo sapiens GN=IARS PE=1 SV=2                               | SYIC_HUMAN   | 144,501.80 | 5.50%   | 0  | 0  | 0  | 0.00%  |
| c(-)-Tiva2 | Interleukin enhancer-binding factor 2 OS=Homo sapiens GN=ILF2 PE=1 SV=2                             | ILF2_HUMAN   | 43,062.70  | 100.00% | 4  | 5  | 5  | 14.10% |
| c(-)-Tiva2 | Bifunctional glutamate/proline-tRNA ligase OS=Homo sapiens GN=EPRS PE=1 SV=5                        | SYEP_HUMAN   | 170,593.20 | 62.00%  | 0  | 0  | 0  | 0.00%  |
| c(-)-Tiva2 | Tubulin alpha-1C chain OS=Homo sapiens GN=TUBA1C PE=1 SV=1                                          | TBA1C_HUMAN  | 49,895.50  | 92.20%  | 1  | 1  | 1  | 3.79%  |
| c(-)-Tiva2 | Alpha-actinin-1 OS=Homo sapiens GN=ACTN1 PE=1 SV=2                                                  | ACTN1_HUMAN  | 103,061.10 | 100.00% | 16 | 16 | 16 | 23.50% |
| c(-)-Tiva2 | Actin-related protein 2/3 complex subunit 2 OS=Homo sapiens GN=ARPC2 PE=1 SV=1                      | ARPC2_HUMAN  | 34,333.70  | 100.00% | 1  | 1  | 1  | 4.67%  |
| c(-)-Tiva2 | Prohibitin OS=Homo sapiens GN=PHB PE=1 SV=1                                                         | PHB_HUMAN    | 29,804.60  | 100.00% | 3  | 3  | 3  | 15.40% |
| c(-)-Tiva2 | Beta-actin-like protein 2 OS=Homo sapiens GN=ACTBL2 PE=1 SV=2                                       | ACTBL_HUMAN  | 42,004.20  | 100.00% | 3  | 3  | 3  | 6.12%  |
| c(-)-Tiva2 | Ethanolamine-phosphate phospho-lyase OS=Homo sapiens GN=AGXT2L1 PE=1 SV=1                           | AT2L1_HUMAN  | 55,671.70  | 70.20%  | 1  | 1  | 1  | 3.01%  |
| c(-)-Tiva2 | Pre-mRNA-processing-splicing factor 8 OS=Homo sapiens GN=PRPF8 PE=1 SV=2                            | PRP8_HUMAN   | 273,608.60 | 100.00% | 4  | 4  | 4  | 2.40%  |
| c(-)-Tiva2 | T-complex protein 1 subunit theta OS=Homo sapiens GN=CCT8 PE=1 SV=4                                 | TCPQ_HUMAN   | 59,621.00  | 20.60%  | 0  | 0  | 0  | 0.00%  |
| c(-)-Tiva2 | Histone H4 OS=Homo sapiens GN=HIST1H4A PE=1 SV=2                                                    | H4_HUMAN     | 11,367.70  | 100.00% | 2  | 2  | 2  | 21.40% |
| c(-)-Tiva2 | Desmin OS=Homo sapiens GN=DES PE=1 SV=3                                                             | DESM_HUMAN   | 53,536.60  | 100.00% | 2  | 2  | 2  | 1.91%  |
| c(-)-Tiva2 | Cyclin-dependent kinase 9 OS=Homo sapiens GN=CDK9 PE=1 SV=3                                         | CDK9_HUMAN   | 42,779.10  | 99.80%  | 1  | 1  | 1  | 3.23%  |
| c(-)-Tiva2 | Coronin-2A OS=Homo sapiens GN=CORO2A PE=2 SV=2                                                      | COR2A_HUMAN  | 59,764.70  | 100.00% | 4  | 4  | 4  | 9.71%  |
| c(-)-Tiva2 | Glypican 1 OS=Homo sapiens GN=GPC1 PE=1 SV=2                                                        | GPC1_HUMAN   | 61,681.30  | 100.00% | 1  | 1  | 1  | 3.41%  |
| c(-)-Tiva2 | Ras-related protein Rab-11A OS=Homo sapiens GN=RAB11A PE=1 SV=3                                     | RB11A_HUMAN  | 24,393.90  | 100.00% | 2  | 2  | 2  | 11.10% |
| c(-)-Tiva2 | Stomatin-like protein 2, mitochondrial OS=Homo sapiens GN=STOML2 PE=1 SV=1                          | STML2_HUMAN  | 38,534.50  | 100.00% | 5  | 5  | 5  | 21.30% |
| c(-)-Tiva2 | Small nuclear ribonucleoprotein Sm D1 OS=Homo sapiens GN=SNRPD1 PE=1 SV=1                           | SMD1_HUMAN   | 13,281.90  | 94.40%  | 1  | 1  | 1  | 10.90% |
| c(-)-Tiva2 | Signal-induced proliferation-associated 1-like protein 1 OS=Homo sapiens GN=SIPA1L1 PE=1 SV=4       | S1L1L_HUMAN  | 200,032.20 | 20.10%  | 0  | 0  | 0  | 0.00%  |
| c(-)-Tiva2 | Nucleolin OS=Homo sapiens GN=NCL PE=1 SV=3                                                          | NUCL_HUMAN   | 76,615.90  | 100.00% | 11 | 13 | 14 | 18.50% |
| c(-)-Tiva2 | 4F2 cell-surface antigen heavy chain OS=Homo sapiens GN=SLC3A2 PE=1 SV=3                            | 4F2_HUMAN    | 67,996.40  | 100.00% | 2  | 2  | 2  | 5.24%  |
| c(-)-Tiva2 | Apolipoprotein B-100 OS=Homo sapiens GN=APOB PE=1 SV=2                                              | APOB_HUMAN   | 515,614.80 | 100.00% | 2  | 2  | 2  | 0.57%  |
| c(-)-Tiva2 | Myosin regulatory light chain 12A OS=Homo sapiens GN=MYL12A PE=1 SV=2                               | ML12A_HUMAN  | 19,795.30  | 100.00% | 5  | 6  | 7  | 34.50% |
| c(-)-Tiva2 | Inositol 1,4,5-trisphosphate receptor type 3 OS=Homo sapiens GN=ITPR3 PE=1 SV=2                     | ITPR3_HUMAN  | 304,110.30 | 100.00% | 7  | 7  | 7  | 4.38%  |
| c(-)-Tiva2 | Epilakin OS=Homo sapiens GN=EPPK1 PE=1 SV=2                                                         | EPIPL_HUMAN  | 555,615.40 | 100.00% | 5  | 6  | 6  | 1.38%  |
| c(-)-Tiva2 | THO complex subunit 4 OS=Homo sapiens GN=ALYREF PE=1 SV=3                                           | THOC4_HUMAN  | 26,888.70  | 95.00%  | 1  | 1  | 1  | 7.00%  |
| c(-)-Tiva2 | Cell division cycle 5-like protein OS=Homo sapiens GN=CCD5L PE=1 SV=2                               | CCD5L_HUMAN  | 92,254.20  | 78.90%  | 1  | 1  | 1  | 2.37%  |
| c(-)-Tiva2 | Keratin, type II cuticular Hb1 OS=Homo sapiens GN=KRT81 PE=1 SV=3                                   | KRT81_HUMAN  | 54,927.80  | 100.00% | 3  | 3  | 3  | 5.54%  |
| c(-)-Tiva2 | Pyruvate dehydrogenase protein X component, mitochondrial OS=Homo sapiens GN=PDHX PE=1 SV=3         | ODPX_HUMAN   | 54,123.80  | 87.60%  | 0  | 0  | 0  | 0.00%  |
| c(-)-Tiva2 | Dermcidin OS=Homo sapiens GN=DCD PE=1 SV=2                                                          | DCD_HUMAN    | 11,284.10  | 99.60%  | 1  | 1  | 1  | 10.00% |
| c(-)-Tiva2 | Spectrin beta chain, non-erythrocytic 2 OS=Homo sapiens GN=SPTBN2 PE=1 SV=3                         | SPTN2_HUMAN  | 271,325.90 | 100.00% | 56 | 62 | 67 | 30.90% |
| c(-)-Tiva2 | Keratin, type I cytoskeletal 9 OS=Homo sapiens GN=KRT9 PE=1 SV=3                                    | K1C9_HUMAN   | 62,065.90  | 100.00% | 7  | 7  | 7  | 24.60% |
| c(-)-Tiva2 | 6-phosphofructokinase type C OS=Homo sapiens GN=PFKP PE=1 SV=2                                      | K6PP_HUMAN   | 85,597.40  | 42.40%  | 0  | 0  | 0  | 0.00%  |
| c(-)-Tiva2 | Tubulin alpha-4A chain OS=Homo sapiens GN=TUBAA4 PE=1 SV=1                                          | TBA4A_HUMAN  | 49,924.60  | 95.00%  | 1  | 1  | 1  | 4.46%  |
| c(-)-Tiva2 | Heat shock 70 kDa protein 6 OS=Homo sapiens GN=HSPA6 PE=1 SV=2                                      | HSP76_HUMAN  | 71,028.80  | 66.80%  | 1  | 1  | 1  | 1.71%  |
| c(-)-Tiva2 | Voltage-dependent anion-selective channel protein 3 OS=Homo sapiens GN=VDAC3 PE=1 SV=1              | VDAC3_HUMAN  | 30,659.90  | 99.90%  | 1  | 1  | 1  | 7.07%  |
| c(-)-Tiva2 | Sodium/potassium-transporting ATPase subunit alpha-1 OS=Homo sapiens GN=ATP1A1 PE=1 SV=1            | AT1A1_HUMAN  | 112,899.50 | 100.00% | 6  | 6  | 6  | 7.72%  |
| c(-)-Tiva2 | Tubulin beta chain OS=Homo sapiens GN=TUBB PE=1 SV=2                                                | TBB5_HUMAN   | 49,670.60  | 80.90%  | 1  | 1  | 1  | 3.38%  |
| c(-)-Tiva2 | Heterogeneous nuclear ribonucleoprotein A1 OS=Homo sapiens GN=HNRNPA1 PE=1 SV=5                     | ROA1_HUMAN   | 38,747.00  | 100.00% | 2  | 2  | 2  | 9.14%  |
| c(-)-Tiva2 | Peroxiredoxin-1 OS=Homo sapiens GN=PRDX1 PE=1 SV=1                                                  | PRDX1_HUMAN  | 22,110.90  | 100.00% | 6  | 7  | 7  | 32.70% |
| c(-)-Tiva2 | 60S acidic ribosomal protein P0-like OS=Homo sapiens GN=RPLP0P6 PE=5 SV=1                           | RLA0L_HUMAN  | 34,365.10  | 100.00% | 3  | 3  | 3  | 10.70% |
| c(-)-Tiva2 | Importin subunit beta-1 OS=Homo sapiens GN=KPNB1 PE=1 SV=2                                          | IMB1_HUMAN   | 97,171.30  | 100.00% | 2  | 2  | 2  | 3.08%  |
| c(-)-Tiva2 | Prohibitin-2 OS=Homo sapiens GN=PHB2 PE=1 SV=2                                                      | PHB2_HUMAN   | 33,297.60  | 100.00% | 2  | 2  | 2  | 7.36%  |
| c(-)-Tiva2 | 40S ribosomal protein S16 OS=Homo sapiens GN=RP516 PE=1 SV=2                                        | RS16_HUMAN   | 16,445.90  | 100.00% | 2  | 2  | 2  | 14.40% |
| c(-)-Tiva2 | RuvB-like 1 OS=Homo sapiens GN=RUVBL1 PE=1 SV=1                                                     | RUVB1_HUMAN  | 50,229.40  | 100.00% | 4  | 4  | 4  | 11.40% |
| c(-)-Tiva2 | Uncharacterized protein C19orf21 OS=Homo sapiens GN=C19orf21 PE=1 SV=1                              | CSO21_HUMAN  | 75,355.70  | 100.00% | 10 | 10 | 10 | 24.30% |
| c(-)-Tiva2 | Guanine nucleotide-binding protein (G)(I)(S)(G)(T) subunit beta-2 OS=Homo sapiens GN=GNB2 PE=1 SV=3 | GBB2_HUMAN   | 37,331.80  | 19.00%  | 0  | 0  | 0  | 0.00%  |
| c(-)-Tiva2 | Heterogeneous nuclear ribonucleoprotein R OS=Homo sapiens GN=HNRNPR PE=1 SV=1                       | HNRPR_HUMAN  | 70,943.90  | 100.00% | 1  | 1  | 1  | 2.05%  |
| c(-)-Tiva2 | 40S ribosomal protein S27-like OS=Homo sapiens GN=RP527L PE=1 SV=3                                  | RS27L_HUMAN  | 9,477.00   | 63.60%  | 1  | 1  | 1  | 9.52%  |
| c(-)-Tiva2 | Desmoglein-2 OS=Homo sapiens GN=DSG2 PE=1 SV=2                                                      | DSG2_HUMAN   | 122,294.40 | 100.00% | 3  | 3  | 3  | 4.03%  |
| c(-)-Tiva2 | ERO1-like protein alpha OS=Homo sapiens GN=ERO1L PE=1 SV=2                                          | ERO1A_HUMAN  | 54,394.70  | 100.00% | 2  | 2  | 2  | 5.56%  |
| c(-)-Tiva2 | Heterogeneous nuclear ribonucleoprotein A1-like 2 OS=Homo sapiens GN=HNRNPA1L2 PE=2 SV=2            | RA1L2_HUMAN  | 34,225.40  | 100.00% | 6  | 6  | 6  | 31.20% |
| c(-)-Tiva2 | Sciellin OS=Homo sapiens GN=SCEL PE=1 SV=2                                                          | SCEL_HUMAN   | 77,553.40  | 100.00% | 1  | 1  | 1  | 1.31%  |
| c(-)-Tiva2 | 116 kDa U5 small nuclear ribonucleoprotein component OS=Homo sapiens GN=EFTUD2 PE=1 SV=1            | USS1_HUMAN   | 109,438.10 | 100.00% | 6  | 6  | 6  | 9.47%  |
| c(-)-Tiva2 | Small nuclear ribonucleoprotein Sm D3 OS=Homo sapiens GN=SNRPD3 PE=1 SV=1                           | SMD3_HUMAN   | 13,916.60  | 100.00% | 2  | 2  | 2  | 24.60% |
| c(-)-Tiva2 | Actin-related protein 2/3 complex subunit 5-like protein OS=Homo sapiens GN=ARPC5L PE=1 SV=1        | ARPSL_HUMAN  | 16,941.30  | 100.00% | 2  | 2  | 2  | 16.30% |
| c(-)-Tiva2 | Heterogeneous nuclear ribonucleoprotein A0 OS=Homo sapiens GN=HNRNPA0 PE=1 SV=1                     | ROA0_HUMAN   | 30,840.50  | 90.20%  | 1  | 1  | 1  | 6.56%  |
| c(-)-Tiva2 | CD59 glycoprotein OS=Homo sapiens GN=CD59 PE=1 SV=1                                                 | CD59_HUMAN   | 14,177.20  | 83.00%  | 1  | 1  | 1  | 9.38%  |
| c(-)-Tiva2 | ATP synthase subunit gamma, mitochondrial OS=Homo sapiens GN=ATP5C1 PE=1 SV=1                       | ATPG_HUMAN   | 32,998.00  | 57.20%  | 1  | 1  | 1  | 3.69%  |
| c(-)-Tiva2 | Eukaryotic translation initiation factor 3 subunit C OS=Homo sapiens GN=EIF3C PE=1 SV=1             | EIF3C_HUMAN  | 105,347.20 | 11.10%  | 0  | 0  | 0  | 0.00%  |
| c(-)-Tiva2 | Filamin-B OS=Homo sapiens GN=FLNB PE=1 SV=2                                                         | FLNB_HUMAN   | 278,158.80 | 100.00% | 37 | 37 | 42 | 22.60% |
| c(-)-Tiva2 | Golgin subfamily 8 member 1 OS=Homo sapiens GN=GOLGB1 PE=1 SV=2                                     | GOGB1_HUMAN  | 376,017.80 | 100.00% | 8  | 9  | 9  | 4.02%  |
| c(-)-Tiva2 | Keratin, type II cytoskeletal 2 epidermal OS=Homo sapiens GN=KRT2 PE=1 SV=2                         | K22E_HUMAN   | 65,433.90  | 100.00% | 11 | 11 | 11 | 19.70% |
| c(-)-Tiva2 | Procollagen-lysine,2-oxoglutarate 5-dioxygenase 1 OS=Homo sapiens GN=PLOD1 PE=1 SV=2                | PLOD1_HUMAN  | 83,552.50  | 27.10%  | 0  | 0  | 0  | 0.00%  |
| c(-)-Tiva2 | Villin-like protein OS=Homo sapiens GN=VILL PE=2 SV=3                                               | VILL_HUMAN   | 95,907.80  | 100.00% | 7  | 7  | 8  | 12.00% |
| c(-)-Tiva2 | Keratin, type II cytoskeletal 7 OS=Homo sapiens GN=KRT7 PE=1 SV=5                                   | K2C7_HUMAN   | 51,387.30  | 100.00% | 15 | 15 | 16 | 31.10% |
| c(-)-Tiva2 | Heat shock protein HSP 90-alpha OS=Homo sapiens GN=HSP90AA1 PE=1 SV=5                               | HS90A_HUMAN  | 84,663.20  | 100.00% | 2  | 2  | 2  | 3.96%  |
| c(-)-Tiva2 | Guanine nucleotide-binding protein (G)(k) subunit alpha OS=Homo sapiens GN=GNAI3 PE=1 SV=3          | GNAI3_HUMAN  | 40,533.50  | 100.00% | 1  | 1  | 1  | 2.82%  |
| c(-)-Tiva2 | Cytoplasmic dynein 1 heavy chain 1 OS=Homo sapiens GN=DYNC1H1 PE=1 SV=5                             | DYHC1_HUMAN  | 532,405.60 | 100.00% | 3  | 3  | 3  | 0.84%  |
| c(-)-Tiva2 | Hepatocyte growth factor receptor OS=Homo sapiens GN=MET PE=1 SV=4                                  | MET_HUMAN    | 155,543.40 | 100.00% | 12 | 15 | 16 | 11.70% |
| c(-)-Tiva2 | Coronin-1B OS=Homo sapiens GN=CORO1B PE=1 SV=1                                                      | COR1B_HUMAN  | 54,234.90  | 100.00% | 2  | 2  | 2  | 4.91%  |
| c(-)-Tiva2 | Neurabin-1 OS=Homo sapiens GN=PPP1R9A PE=1 SV=2                                                     | NEB1_HUMAN   | 123,343.60 | 100.00% | 2  | 2  | 2  | 5.74%  |
| c(-)-Tiva2 | Tubulin alpha-1A chain OS=Homo sapiens GN=TUBA1A PE=1 SV=1                                          | TBA1A_HUMAN  | 50,135.70  | 100.00% | 10 | 10 | 10 | 33.30% |
| c(-)-Tiva2 | TAR DNA-binding protein 43 OS=Homo sapiens GN=TARDBP PE=1 SV=1                                      | TADB8P_HUMAN | 44,739.70  | 94.10%  | 1  | 1  | 1  | 4.35%  |
| c(-)-Tiva2 | 40S ribosomal protein S10 OS=Homo sapiens GN=RP510 PE=1 SV=1                                        | RS10_HUMAN   | 18,898.30  | 46.00%  | 0  | 0  | 0  | 0.00%  |
| c(-)-Tiva2 | WD40 repeat-containing protein SMU1 OS=Homo sapiens GN=SMU1 PE=1 SV=2                               | SMU1_HUMAN   | 57,544.80  | 85.90%  | 1  | 1  | 1  | 2.53%  |
| c(-)-Tiva2 | 26S protease regulatory subunit 4 OS=Homo sapiens GN=PSMC1 PE=1 SV=1                                | PRS4_HUMAN   | 49,186.40  | 95.00%  | 1  | 1  | 1  | 2.73%  |
| c(-)-Tiva2 | Actin-related protein 3B OS=Homo sapiens GN=ACTR3B PE=2 SV=1                                        | ARP3B_HUMAN  | 47,608.10  | 50.50%  | 1  | 1  | 1  | 2.15%  |
| c(-)-Tiva2 | L-2-hydroxyglutarate dehydrogenase, mitochondrial OS=Homo sapiens GN=L2HGDH PE=1 SV=3               | L2HDH_HUMAN  | 50,317.40  | 15.30%  | 0  | 0  | 0  | 0.00%  |
| c(-)-Tiva2 | Pre-mRNA-processing factor 6 OS=Homo sapiens GN=PRPF6 PE=1 SV=1                                     | PRPF6_HUMAN  | 106,927.70 | 100.00% | 4  | 4  | 4  | 4.57%  |
| c(-)-Tiva2 | Serum albumin OS=Homo sapiens GN=ALB PE=1 SV=2                                                      | ALBU_HUMAN   | 69,366.90  | 100.00% | 2  | 2  | 2  | 4.43%  |
| c(-)-Tiva2 | 5'-nucleotidase OS=Homo sapiens GN=NT5E PE=1 SV=1                                                   | 5NTD_HUMAN   | 63,369.00  | 100.00% | 5  | 5  | 5  | 13.90% |
| c(-)-Tiva2 | Inosine-5'-monophosphate dehydrogenase 2 OS=Homo sapiens GN=IMPDH2 PE=1 SV=2                        | IMDH2_HUMAN  | 55,806.50  | 73.10%  | 1  | 1  | 1  | 2.14%  |
| c(-)-Tiva2 | Tumor suppressor p53-binding protein 1 OS=Homo sapiens GN=TP53BP1 PE=1 SV=2                         | TP53B_HUMAN  | 213,572.20 | 100.00% | 4  | 4  | 4  | 3.70%  |
| c(-)-Tiva2 | Protein SEC13 homolog OS=Homo sapiens GN=SEC13 PE=1 SV=3                                            | SEC13_HUMAN  | 35,539.60  | 95.00%  | 1  | 1  | 1  | 7.14%  |
| c(-)-Tiva2 | Keratin, type II cytoskeletal 1 OS=Homo sapiens GN=KRT1 PE=1 SV=6                                   | K2C1_HUMAN   | 66,040.30  | 100.00% | 12 | 12 | 12 | 25.20% |
| c(-)-Tiva2 | Estradiol 17-beta-dehydrogenase 8 OS=Homo sapiens GN=HSD17B8 PE=1 SV=2                              | DHB8_HUMAN   | 26,973.20  | 100.00% | 1  | 1  | 1  | 5.75%  |
| c(-)-Tiva2 | Voltage-dependent anion-selective channel protein 2 OS=Homo sapiens GN=VDAC2 PE=1 SV=2              | VDAC2_HUMAN  | 31,567.30  | 100.00% | 1  | 1  | 1  | 6.46%  |
| c(-)-Tiva2 | ATPase family AAA domain-containing protein 3A OS=Homo sapiens GN=ATAD3A PE=1 SV=2                  | ATD3A_HUMAN  | 71,370.20  | 95.00%  | 1  | 1  | 1  | 3.15%  |
| c(-)-Tiva2 | Dihydrolipoyl dehydrogenase, mitochondrial OS=Homo sapiens GN=DLD PE=1 SV=2                         | DLDH_HUMAN   | 54,177.50  | 100.00% | 1  | 1  | 1  | 1.96%  |
| c(-)-Tiva2 | RNA-binding motif protein, X chromosome OS=Homo sapiens GN=RBMX PE=1 SV=3                           | RBMX_HUMAN   | 42,333.70  | 100.00% | 4  | 4  | 5  | 10.50% |
| c(-)-Tiva2 | Guanine nucleotide-binding protein (G)(l) subunit alpha-2 OS=Homo sapiens GN=GNAI2 PE=1 SV=3        | GNAI2_HUMAN  | 40,452.00  | 99.70%  | 1  | 1  | 1  | 5.35%  |
| c(-)-Tiva2 | Serine/arginine-rich splicing factor 3 OS=Homo sapiens GN=SRSF3 PE=1 SV=1                           | SRSF3_HUMAN  | 19,330.00  | 100.00% | 2  | 2  | 2  | 18.30% |
| c(-)-Tiva2 | DNA-dependent protein kinase catalytic subunit OS=Homo sapiens GN=PRKDC PE=1 SV=3                   | PRKDC_HUMAN  | 469,095.50 | 100.00% | 13 | 13 | 13 | 4.09%  |
| c(-)-Tiva2 | Integrin alpha-6 OS=Homo sapiens GN=ITGA6 PE=1 SV=4                                                 | ITA6_HUMAN   | 126,636.10 | 100.00% | 1  | 1  | 1  | 1.06%  |

|            |                                                                                                                           |               |            |         |     |     |     |        |
|------------|---------------------------------------------------------------------------------------------------------------------------|---------------|------------|---------|-----|-----|-----|--------|
| c(-)-Tiva2 | Guanine nucleotide-binding protein G(i)/G(s)/G(t) subunit beta-1 OS=Homo sapiens GN=GNB1 PE=1 SV=3                        | GBB1_HUMAN    | 37,377.50  | 100.00% | 2   | 2   | 2   | 8.53%  |
| c(-)-Tiva2 | 40S ribosomal protein S28 OS=Homo sapiens GN=RP528 PE=1 SV=1                                                              | RS28_HUMAN    | 7,840.90   | 88.80%  | 1   | 1   | 1   | 17.40% |
| c(-)-Tiva2 | Myosin light chain 6B OS=Homo sapiens GN=MYL6B PE=1 SV=1                                                                  | MYL6B_HUMAN   | 22,764.10  | 100.00% | 2   | 3   | 3   | 11.50% |
| c(-)-Tiva2 | Heterogeneous nuclear ribonucleoprotein Q OS=Homo sapiens GN=SYNCRIP PE=1 SV=2                                            | HNRNP_Q_HUMAN | 69,603.50  | 100.00% | 6   | 6   | 6   | 14.30% |
| c(-)-Tiva2 | Pyruvate dehydrogenase E1 component subunit beta, mitochondrial OS=Homo sapiens GN=PDHB PE=1 SV=3                         | ODPB_HUMAN    | 39,233.40  | 100.00% | 6   | 6   | 6   | 24.00% |
| c(-)-Tiva2 | Myosin-14 OS=Homo sapiens GN=MYH14 PE=1 SV=2                                                                              | MYH14_HUMAN   | 227,872.60 | 100.00% | 43  | 49  | 52  | 27.70% |
| c(-)-Tiva2 | Keratin, type I cytoskeletal 10 OS=Homo sapiens GN=KRT10 PE=1 SV=6                                                        | K1C10_HUMAN   | 58,828.80  | 100.00% | 12  | 12  | 13  | 28.40% |
| c(-)-Tiva2 | 40S ribosomal protein S20 OS=Homo sapiens GN=RP520 PE=1 SV=1                                                              | RS20_HUMAN    | 13,373.00  | 85.60%  | 1   | 1   | 1   | 12.60% |
| c(-)-Tiva2 | Putative tropomyosin alpha-3 chain-like protein OS=Homo sapiens PE=5 SV=2                                                 | TPM3L_HUMAN   | 26,270.00  | 99.90%  | 1   | 1   | 1   | 6.28%  |
| c(-)-Tiva2 | Coatomer subunit delta OS=Homo sapiens GN=ARCN1 PE=1 SV=1                                                                 | COPD_HUMAN    | 57,211.20  | 77.40%  | 1   | 1   | 1   | 2.35%  |
| c(-)-Tiva2 | 60S ribosomal protein L24 OS=Homo sapiens GN=RPL24 PE=1 SV=1                                                              | RL24_HUMAN    | 17,779.50  | 49.40%  | 1   | 1   | 1   | 8.28%  |
| c(-)-Tiva2 | Envoplakin OS=Homo sapiens GN=EVPL PE=1 SV=3                                                                              | EVPL_HUMAN    | 231,604.40 | 100.00% | 4   | 4   | 4   | 2.95%  |
| c(-)-Tiva2 | Insulin-like growth factor 2 mRNA-binding protein 3 OS=Homo sapiens GN=IGF2BP3 PE=1 SV=2                                  | IF2B3_HUMAN   | 63,706.00  | 64.50%  | 1   | 1   | 1   | 2.76%  |
| c(-)-Tiva2 | 40S ribosomal protein S8 OS=Homo sapiens GN=RP58 PE=1 SV=2                                                                | RS8_HUMAN     | 24,206.40  | 95.00%  | 1   | 1   | 1   | 6.25%  |
| c(-)-Tiva2 | Keratin, type II cytoskeletal 6A OS=Homo sapiens GN=KRT6A PE=1 SV=3                                                       | K2C6A_HUMAN   | 60,046.40  | 100.00% | 3   | 3   | 3   | 6.74%  |
| c(-)-Tiva2 | Clathrin heavy chain 1 OS=Homo sapiens GN=CLTC PE=1 SV=5                                                                  | CLH1_HUMAN    | 191,618.90 | 100.00% | 36  | 39  | 44  | 28.80% |
| c(-)-Tiva2 | Tubulin beta-3 chain OS=Homo sapiens GN=TUBB3 PE=1 SV=2                                                                   | TBB3_HUMAN    | 50,432.70  | 100.00% | 2   | 2   | 3   | 9.78%  |
| c(-)-Tiva2 | Neutral alpha-glucosidase AB OS=Homo sapiens GN=GANAB PE=1 SV=3                                                           | GANAB_HUMAN   | 106,875.90 | 63.40%  | 0   | 0   | 0   | 0.00%  |
| c(-)-Tiva2 | Transmembrane emp24 domain-containing protein 10 OS=Homo sapiens GN=TMED10 PE=1 SV=2                                      | TMEDA_HUMAN   | 24,977.50  | 92.00%  | 1   | 1   | 1   | 5.02%  |
| c(-)-Tiva2 | ATP-dependent RNA helicase DDX1 OS=Homo sapiens GN=DDX1 PE=1 SV=2                                                         | DDX1_HUMAN    | 82,433.20  | 10.10%  | 0   | 0   | 0   | 0.00%  |
| c(-)-Tiva2 | LIM domain only protein 7 OS=Homo sapiens GN=LMO7 PE=1 SV=3                                                               | LMO7_HUMAN    | 192,699.40 | 100.00% | 19  | 20  | 23  | 17.20% |
| c(-)-Tiva2 | 40S ribosomal protein SA OS=Homo sapiens GN=RP5A PE=1 SV=4                                                                | RSA_HUMAN     | 32,854.10  | 100.00% | 4   | 4   | 5   | 22.00% |
| c(-)-Tiva2 | ATP-binding cassette sub-family A member 5 OS=Homo sapiens GN=ABCA5 PE=2 SV=2                                             | ABCA5_HUMAN   | 186,517.10 | 53.50%  | 1   | 1   | 1   | 1.28%  |
| c(-)-Tiva2 | Filamin-A OS=Homo sapiens GN=FLNA PE=1 SV=4                                                                               | FLNA_HUMAN    | 280,729.40 | 100.00% | 24  | 24  | 24  | 14.70% |
| c(-)-Tiva2 | Cadherin-1 OS=Homo sapiens GN=CDH1 PE=1 SV=3                                                                              | CADH1_HUMAN   | 97,457.60  | 99.90%  | 1   | 1   | 1   | 1.81%  |
| c(-)-Tiva2 | Tyrosine-protein kinase Lyn OS=Homo sapiens GN=LYN PE=1 SV=3                                                              | LYN_HUMAN     | 58,576.30  | 100.00% | 3   | 3   | 3   | 7.81%  |
| c(-)-Tiva2 | 40S ribosomal protein S14 OS=Homo sapiens GN=RP514 PE=1 SV=3                                                              | RS14_HUMAN    | 16,272.90  | 99.90%  | 1   | 1   | 1   | 8.61%  |
| c(-)-Tiva2 | Heterogeneous nuclear ribonucleoprotein F OS=Homo sapiens GN=HNRNPF PE=1 SV=3                                             | HNRNP_F_HUMAN | 45,671.90  | 95.00%  | 1   | 1   | 1   | 4.10%  |
| c(-)-Tiva2 | Zinc finger protein 185 OS=Homo sapiens GN=ZNF185 PE=1 SV=3                                                               | ZN185_HUMAN   | 73,525.40  | 100.00% | 3   | 3   | 3   | 9.43%  |
| c(-)-Tiva2 | Protein NipSnap homolog 1 OS=Homo sapiens GN=NIPSNAP1 PE=1 SV=1                                                           | NIP5L_HUMAN   | 33,310.90  | 100.00% | 2   | 2   | 2   | 8.45%  |
| c(-)-Tiva2 | Keratin, type II cytoskeletal 8 OS=Homo sapiens GN=KRT8 PE=1 SV=7                                                         | K2C8_HUMAN    | 53,706.20  | 100.00% | 22  | 26  | 26  | 38.30% |
| c(-)-Tiva2 | Pyruvate dehydrogenase E1 component subunit alpha, somatic form, mitochondrial OS=Homo sapiens GN=PDHA1 PE=1 SV=2         | ODPA_HUMAN    | 43,296.50  | 100.00% | 4   | 4   | 4   | 10.50% |
| c(-)-Tiva2 | Unconventional myosin-VI OS=Homo sapiens GN=MYO6 PE=1 SV=4                                                                | MYO6_HUMAN    | 149,697.10 | 100.00% | 16  | 16  | 16  | 16.80% |
| c(-)-Tiva2 | WD repeat-containing protein 1 OS=Homo sapiens GN=WDR1 PE=1 SV=4                                                          | WDR1_HUMAN    | 66,193.20  | 100.00% | 3   | 3   | 3   | 7.76%  |
| c(-)-Tiva2 | Keratin, type I cytoskeletal 19 OS=Homo sapiens GN=KRT19 PE=1 SV=4                                                        | K1C19_HUMAN   | 44,107.10  | 100.00% | 17  | 20  | 21  | 45.80% |
| c(-)-Tiva2 | Nuclear mitotic apparatus protein 1 OS=Homo sapiens GN=NUMA1 PE=1 SV=2                                                    | NUMA1_HUMAN   | 238,259.70 | 100.00% | 15  | 15  | 15  | 9.98%  |
| c(-)-Tiva2 | Carbonyl reductase family member 4 OS=Homo sapiens GN=CBR4 PE=1 SV=3                                                      | CBR4_HUMAN    | 25,301.30  | 55.90%  | 1   | 1   | 1   | 5.06%  |
| c(-)-Tiva2 | Superkiller viralidic activity 2-like 2 OS=Homo sapiens GN=SKIV2L2 PE=1 SV=3                                              | SK2L2_HUMAN   | 117,808.30 | 99.60%  | 1   | 1   | 1   | 0.96%  |
| c(-)-Tiva2 | Transitional endoplasmic reticulum ATPase OS=Homo sapiens GN=VCP PE=1 SV=4                                                | TERA_HUMAN    | 89,324.80  | 100.00% | 2   | 2   | 2   | 4.09%  |
| c(-)-Tiva2 | Kinectin OS=Homo sapiens GN=KTN1 PE=1 SV=1                                                                                | KTN1_HUMAN    | 156,276.30 | 100.00% | 8   | 8   | 8   | 7.89%  |
| c(-)-Tiva2 | Fatty aldehyde dehydrogenase OS=Homo sapiens GN=ALDH3A2 PE=1 SV=1                                                         | AL3A2_HUMAN   | 54,849.80  | 100.00% | 2   | 2   | 2   | 4.95%  |
| c(-)-Tiva2 | Insulin-like growth factor 2 mRNA-binding protein 2 OS=Homo sapiens GN=IGF2BP2 PE=1 SV=2                                  | IF2B2_HUMAN   | 66,122.40  | 99.90%  | 1   | 1   | 1   | 2.67%  |
| c(-)-Tiva2 | Interphotoreceptor matrix proteoglycan 1 OS=Homo sapiens GN=IMPG1 PE=1 SV=2                                               | IMPG1_HUMAN   | 89,389.60  | 56.50%  | 1   | 1   | 1   | 1.38%  |
| c(-)-Tiva2 | Polymerase I and transcript release factor OS=Homo sapiens GN=PTRF PE=1 SV=1                                              | PTRF_HUMAN    | 43,476.50  | 100.00% | 2   | 3   | 3   | 8.97%  |
| c(-)-Tiva2 | Prelamin-A/C OS=Homo sapiens GN=LMNA PE=1 SV=1                                                                            | LMNA_HUMAN    | 74,140.70  | 100.00% | 22  | 25  | 25  | 39.60% |
| c(-)-Tiva2 | Laminin subunit alpha-5 OS=Homo sapiens GN=LAMA5 PE=1 SV=8                                                                | LAMA5_HUMAN   | 399,725.10 | 100.00% | 3   | 3   | 4   | 1.16%  |
| c(-)-Tiva2 | ADP/ATP translocase 2 OS=Homo sapiens GN=SLC25A5 PE=1 SV=7                                                                | ADT2_HUMAN    | 32,853.50  | 100.00% | 2   | 2   | 2   | 8.05%  |
| c(-)-Tiva2 | Actin-related protein 3 OS=Homo sapiens GN=ACTR3 PE=1 SV=3                                                                | ARP3_HUMAN    | 47,371.90  | 100.00% | 8   | 8   | 8   | 26.30% |
| c(-)-Tiva2 | Putative pre-mRNA-splicing factor ATP-dependent RNA helicase DHX15 OS=Homo sapiens GN=DXH15 PE=1 SV=2                     | DXH15_HUMAN   | 90,935.20  | 48.20%  | 1   | 1   | 1   | 1.76%  |
| c(-)-Tiva2 | Exportin-2 OS=Homo sapiens GN=CSE1L PE=1 SV=3                                                                             | XPO2_HUMAN    | 110,421.90 | 100.00% | 3   | 3   | 3   | 4.63%  |
| c(-)-Tiva2 | Actin-like protein 6A OS=Homo sapiens GN=ACTL6A PE=1 SV=1                                                                 | ACL6A_HUMAN   | 47,461.10  | 95.00%  | 1   | 1   | 1   | 3.03%  |
| c(-)-Tiva2 | Heterogeneous nuclear ribonucleoprotein D-like OS=Homo sapiens GN=HNRPLD PE=1 SV=3                                        | HNRDL_HUMAN   | 46,438.60  | 100.00% | 4   | 4   | 4   | 11.70% |
| c(-)-Tiva2 | Agrin OS=Homo sapiens GN=AGRN PE=1 SV=5                                                                                   | AGRN_HUMAN    | 217,224.80 | 100.00% | 3   | 3   | 3   | 1.98%  |
| c(-)-Tiva2 | Probable ATP-dependent RNA helicase DDX17 OS=Homo sapiens GN=DDX17 PE=1 SV=2                                              | DDX17_HUMAN   | 80,274.00  | 100.00% | 3   | 3   | 3   | 5.35%  |
| c(-)-Tiva2 | Inositol 1,4,5-trisphosphate receptor type 1 OS=Homo sapiens GN=ITPR1 PE=1 SV=2                                           | ITPR1_HUMAN   | 313,947.70 | 100.00% | 1   | 1   | 1   | 0.36%  |
| c(-)-Tiva2 | Nuclear pore complex protein Nup160 OS=Homo sapiens GN=NUP160 PE=1 SV=3                                                   | NU160_HUMAN   | 162,125.00 | 39.80%  | 0   | 0   | 0   | 0.00%  |
| c(-)-Tiva2 | Doublecortin domain-containing protein 5 OS=Homo sapiens GN=DCDC5 PE=2 SV=2                                               | DCDC5_HUMAN   | 72,754.10  | 28.10%  | 0   | 0   | 0   | 0.00%  |
| c(-)-Tiva2 | Aldo-keto reductase family 1 member C3 OS=Homo sapiens GN=AKR1C3 PE=1 SV=4                                                | AK1C3_HUMAN   | 36,854.10  | 99.90%  | 1   | 1   | 1   | 4.95%  |
| c(-)-Tiva2 | Junction plakoglobin OS=Homo sapiens GN=JUP PE=1 SV=3                                                                     | PLAK_HUMAN    | 81,745.90  | 100.00% | 3   | 3   | 3   | 6.58%  |
| c(-)-Tiva2 | Coproporphyrinogen-III oxidase, mitochondrial OS=Homo sapiens GN=CPOX PE=1 SV=3                                           | HEM6_HUMAN    | 50,152.00  | 93.00%  | 0   | 0   | 0   | 0.00%  |
| c(-)-Tiva2 | Tubulin beta-4B chain OS=Homo sapiens GN=TUBB4B PE=1 SV=1                                                                 | TBB4B_HUMAN   | 49,830.70  | 95.00%  | 1   | 1   | 1   | 2.70%  |
| c(-)-Tiva2 | Pyruvate dehydrogenase E1 component subunit alpha, testis-specific form, mitochondrial OS=Homo sapiens GN=PDHA2 PE=1 SV=2 | ODPAT_HUMAN   | 42,934.10  | 95.00%  | 1   | 1   | 1   | 2.84%  |
| c(-)-Tiva2 | Guanine nucleotide-binding protein G(i) subunit alpha-1 OS=Homo sapiens GN=GNAI1 PE=1 SV=2                                | GNAI1_HUMAN   | 40,362.50  | 99.80%  | 1   | 1   | 1   | 3.11%  |
| c(-)-Tiva2 | ATP-dependent RNA helicase A OS=Homo sapiens GN=DHX9 PE=1 SV=4                                                            | DHX9_HUMAN    | 140,961.50 | 100.00% | 10  | 10  | 10  | 12.20% |
| c(-)-Tiva2 | AP-1 complex subunit beta-1 OS=Homo sapiens GN=APIB1 PE=1 SV=2                                                            | AP1B1_HUMAN   | 104,639.40 | 100.00% | 2   | 2   | 2   | 2.85%  |
| c(-)-Tiva2 | A-kinase anchor protein 8-like OS=Homo sapiens GN=AKAP8L PE=1 SV=3                                                        | AKP8L_HUMAN   | 71,649.80  | 88.20%  | 1   | 1   | 1   | 2.01%  |
| c(-)-Tiva2 | Putative 60S ribosomal protein L13a-like MGC87657 OS=Homo sapiens PE=5 SV=1                                               | L13AX_HUMAN   | 12,135.00  | 84.20%  | 1   | 1   | 1   | 10.80% |
| c(-)-Tiva2 | Heterogeneous nuclear ribonucleoprotein C-like 1 OS=Homo sapiens GN=HNRNPCL1 PE=1 SV=1                                    | HNRCL_HUMAN   | 32,142.70  | 100.00% | 5   | 5   | 5   | 13.30% |
| c(-)-Tiva2 | Splicing factor, proline- and glutamine-rich OS=Homo sapiens GN=SFQPQ PE=1 SV=2                                           | SFPQ_HUMAN    | 76,149.50  | 99.90%  | 2   | 2   | 2   | 2.83%  |
| c(-)-Tiva2 | Glyceraldehyde-3-phosphate dehydrogenase OS=Homo sapiens GN=GAPDH PE=1 SV=3                                               | G3P_HUMAN     | 36,053.40  | 99.80%  | 1   | 1   | 1   | 4.18%  |
| c(-)-Tiva2 | Actin-related protein 2 OS=Homo sapiens GN=ACTR2 PE=1 SV=1                                                                | ARP2_HUMAN    | 44,761.70  | 100.00% | 5   | 5   | 5   | 14.00% |
| c(-)-Tiva2 | Eukaryotic initiation factor 4A-1 OS=Homo sapiens GN=EIF4A1 PE=1 SV=1                                                     | IF4A1_HUMAN   | 46,155.30  | 88.90%  | 1   | 1   | 1   | 3.45%  |
| c(-)-Tiva2 | Actin, cytoplasmic 1 OS=Homo sapiens GN=ACTB PE=1 SV=1                                                                    | ACTB_HUMAN    | 41,737.80  | 100.00% | 11  | 27  | 43  | 42.40% |
| c(-)-Tiva2 | Ig kappa chain C region OS=Homo sapiens GN=IGKC PE=1 SV=1                                                                 | IGKC_HUMAN    | 11,608.60  | 95.00%  | 1   | 1   | 1   | 13.20% |
| c(-)-Tiva2 | U4/U6 small nuclear ribonucleoprotein Prp4 OS=Homo sapiens GN=PRPF4 PE=1 SV=2                                             | PRP4_HUMAN    | 58,450.20  | 89.00%  | 1   | 1   | 1   | 3.07%  |
| c(-)-Tiva2 | Elongation factor 1-delta OS=Homo sapiens GN=EEF1D PE=1 SV=5                                                              | EF1D_HUMAN    | 31,121.90  | 89.60%  | 1   | 1   | 1   | 4.27%  |
| c(-)-Tiva2 | 60S ribosomal protein L23 OS=Homo sapiens GN=RPL23 PE=1 SV=1                                                              | RL23_HUMAN    | 14,865.90  | 94.80%  | 1   | 1   | 1   | 14.30% |
| c(-)-Tiva2 | Gelsolin OS=Homo sapiens GN=GSN PE=1 SV=1                                                                                 | GELS_HUMAN    | 85,697.80  | 100.00% | 8   | 10  | 11  | 18.00% |
| c(-)-Tiva2 | Keratin, type II cytoskeletal 75 OS=Homo sapiens GN=KRT75 PE=1 SV=2                                                       | K2C75_HUMAN   | 59,561.30  | 91.30%  | 1   | 1   | 1   | 1.63%  |
| c(-)-Tiva2 | A-kinase anchor protein 2 OS=Homo sapiens GN=AKAP2 PE=1 SV=3                                                              | AKAP2_HUMAN   | 94,660.90  | 100.00% | 3   | 3   | 3   | 4.54%  |
| c(-)-Tiva2 | Ras-related protein Rab-7a OS=Homo sapiens GN=RAB7A PE=1 SV=1                                                             | RAB7A_HUMAN   | 23,490.00  | 77.00%  | 1   | 1   | 1   | 6.76%  |
| c(-)-Tiva2 | Estradiol 17-beta-dehydrogenase 12 OS=Homo sapiens GN=HSD17B12 PE=1 SV=2                                                  | DHB12_HUMAN   | 34,325.40  | 99.50%  | 1   | 1   | 1   | 4.81%  |
| c(-)-Tiva2 | Fascin OS=Homo sapiens GN=FSCN1 PE=1 SV=3                                                                                 | FSCN1_HUMAN   | 54,530.30  | 100.00% | 2   | 2   | 2   | 8.11%  |
| c(-)-Tiva2 | Disks large-associated protein 5 OS=Homo sapiens GN=DLGAP5 PE=1 SV=2                                                      | DLGP5_HUMAN   | 95,116.60  | 71.90%  | 1   | 1   | 1   | 1.42%  |
| c(-)-Tiva2 | Mitochondrial import inner membrane translocase subunit TIM50 OS=Homo sapiens GN=TIMM50 PE=1 SV=2                         | TIM50_HUMAN   | 39,647.50  | 31.00%  | 0   | 0   | 0   | 0.00%  |
| c(-)-Tiva2 | Unconventional myosin-XVIIIa OS=Homo sapiens GN=MYO18A PE=1 SV=3                                                          | MY18A_HUMAN   | 233,119.80 | 100.00% | 15  | 15  | 16  | 11.70% |
| c(-)-Tiva2 | Splicing factor 3B subunit 3 OS=Homo sapiens GN=SF3B3 PE=1 SV=4                                                           | SF3B3_HUMAN   | 135,579.40 | 100.00% | 8   | 8   | 8   | 9.45%  |
| c(-)-Tiva2 | X-ray repair cross-complementing protein 6 OS=Homo sapiens GN=XRCC6 PE=1 SV=2                                             | XRCC6_HUMAN   | 69,846.40  | 95.00%  | 1   | 1   | 1   | 2.30%  |
| c(-)-Tiva2 | Flotillin-2 OS=Homo sapiens GN=FLOT2 PE=1 SV=2                                                                            | FLOT2_HUMAN   | 47,063.90  | 100.00% | 1   | 1   | 1   | 3.27%  |
| c(-)-Tiva2 | Actin, aortic smooth muscle OS=Homo sapiens GN=ACTA2 PE=1 SV=1                                                            | ACTA_HUMAN    | 42,010.10  | 100.00% | 15  | 31  | 49  | 30.20% |
| c(-)-Tiva2 | Serine/threonine-protein phosphatase 2A 65 kDa regulatory subunit A alpha isoform OS=Homo sapiens GN=PPP2R1A PE=1 SV=2    | 2AAX_HUMAN    | 65,309.70  | 5.00%   | 0   | 0   | 0   | 0.00%  |
| c(-)-Tiva2 | NAD(P)H dehydrogenase [quinone] 1 OS=Homo sapiens GN=NQO1 PE=1 SV=1                                                       | NQO1_HUMAN    | 30,869.00  | 94.70%  | 1   | 1   | 1   | 6.57%  |
| c(-)-Tiva2 | Histone deacetylase 2 OS=Homo sapiens GN=HDAC2 PE=1 SV=2                                                                  | HDAC2_HUMAN   | 55,365.50  | 24.00%  | 0   | 0   | 0   | 0.00%  |
| c(-)-Tiva2 | Keratin, type I cytoskeletal 18 OS=Homo sapiens GN=KRT18 PE=1 SV=2                                                        | K1C18_HUMAN   | 48,059.00  | 100.00% | 14  | 17  | 19  | 36.50% |
| c(-)-Tiva2 | Coatomer subunit beta OS=Homo sapiens GN=COPB1 PE=1 SV=3                                                                  | COPB_HUMAN    | 107,146.00 | 100.00% | 3   | 3   | 3   | 5.56%  |
| c(-)-Tiva2 | Sarcoplasmic/endoplasmic reticulum calcium ATPase 2 OS=Homo sapiens GN=ATP2A2 PE=1 SV=1                                   | AT2A2_HUMAN   | 114,758.80 | 100.00% | 1   | 1   | 1   | 1.44%  |
| c(-)-Tiva2 | Ladinin-1 OS=Homo sapiens GN=LAD1 PE=1 SV=2                                                                               | LAD1_HUMAN    | 57,131.80  | 100.00% | 10  | 10  | 10  | 30.20% |
| c(-)-Tiva2 | Guanine nucleotide-binding protein subunit beta-2-like 1 OS=Homo sapiens GN=GNB2L1 PE=1 SV=3                              | GBL2_HUMAN    | 35,077.00  | 100.00% | 10  | 10  | 10  | 44.80% |
| c(-)-Tiva2 | Myosin-9 OS=Homo sapiens GN=MYH9 PE=1 SV=4                                                                                | MYH9_HUMAN    | 226,537.50 | 100.00% | 113 | 188 | 221 | 54.10% |
| c(-)-Tiva2 | LIM domain and actin-binding protein 1 OS=Homo sapiens GN=LIMA1 PE=1 SV=1                                                 | LIMA1_HUMAN   | 85,226.30  | 100.00% | 38  | 48  | 53  | 58.10% |
| c(-)-Tiva2 | Delta(3,5)-Delta(2,4)-dienoyl-CoA isomerase, mitochondrial OS=Homo sapiens GN=ECH1 PE=1 SV=2                              | ECH1_HUMAN    | 35,816.20  | 67.50%  | 1   | 1   | 1   | 4.88%  |
| c(-)-Tiva2 | Heat shock-related 70 kDa protein 2 OS=Homo sapiens GN=HSPA2 PE=1 SV=1                                                    | HSP72_HUMAN   | 70,023.00  | 100.00% | 4   | 4   | 4   | 5.95%  |
| c(-)-Tiva2 | Tubulin beta-1 chain OS=Homo sapiens GN=TUBB1 PE=1 SV=3                                                                   | TBB1_HUMAN    | 50,327.00  | 100.00% | 2   | 2   | 2   | 3.99%  |
| c(-)-Tiva2 | Putative ribosomal RNA methyltransferase NOP2 OS=Homo sapiens GN=NOP2 PE=1 SV=2                                           | NOP2_HUMAN    | 89,303.60  | 100.00% | 2   | 2   | 2   | 3.57%  |
| c(-)-Tiva2 | ADP/ATP translocase 1 OS=Homo sapiens GN=SLC25A4 PE=1 SV=4                                                                | ADT1_HUMAN    | 33,065.40  | 86.70%  | 1   | 1   | 1   | 4.03%  |
| c(-)-Tiva2 | Exportin-1 OS=Homo sapiens GN=XPO1 PE=1 SV=1                                                                              | XPO1_HUMAN    | 123,388.90 | 100.00% | 3   | 3   | 3   | 4.48%  |
| c(-)-Tiva2 | Small nuclear ribonucleoprotein E OS=Homo sapiens GN=SNRPE PE=1 SV=1                                                      | RUXE_HUMAN    | 10,803.90  | 99.90%  | 1   | 1   | 1   | 12.00% |
| c(-)-Tiva2 | Heterogeneous nuclear ribonucleoprotein A/B OS=Homo sapiens GN=HNRNPAB PE=1 SV=2                                          | ROAA_HUMAN    | 36,225.20  | 99.90%  | 1   | 1   | 1   | 3.92%  |
| c(-)-Tiva2 | Myeloid-associated differentiation marker OS=Homo sapiens GN=MYADM PE=1 SV=2                                              | MYADM_HUMAN   | 35,274.20  | 100.00% | 2   | 2   | 2   | 10.20% |
| c(-)-Tiva2 | Splicing factor 3B subunit 2 OS=Homo sapiens GN=SF3B2 PE=1 SV=2                                                           | SF3B2_HUMAN   | 100,229.40 | 77.80%  | 0   | 0   | 0   | 0.00%  |
| c(-)-Tiva2 | ATP synthase subunit alpha, mitochondrial OS=Homo sapiens GN=ATP5A1 PE=1 SV=1                                             | ATPA_HUMAN    | 59,752.10  | 100.00% | 7   | 7   | 7   | 16.80% |
| c(-)-Tiva2 | Heterogeneous nuclear ribonucleoprotein D0 OS=Homo sapiens GN=HNRNPD PE=1 SV=1                                            | HNRPD_HUMAN   | 38,434.50  | 100.00% | 3   | 3   | 4   | 10.10% |
| c(-)-Tiva2 | Nucleoprotein TPR OS=Homo sapiens GN=TPR PE=1 SV=3                                                                        | TPR_HUMAN     | 267,289.30 | 100.00% | 13  | 13  | 13  | 7.41%  |

|            |                                                          |                             |           |              |            |         |    |     |     |        |
|------------|----------------------------------------------------------|-----------------------------|-----------|--------------|------------|---------|----|-----|-----|--------|
| c(-)-Tiva2 | Histone deacetylase 1                                    | OS=Homo sapiens GN=HDAC1    | PE=1 SV=1 | HDAC1_HUMAN  | 55,104.10  | 100.00% | 2  | 2   | 3   | 7.26%  |
| c(-)-Tiva2 | Keratin, type II cytoskeletal 3                          | OS=Homo sapiens GN=KRT3     | PE=1 SV=3 | K2C3_HUMAN   | 64,418.90  | 95.00%  | 1  | 1   | 1   | 1.91%  |
| c(-)-Tiva2 | Eukaryotic initiation factor 4A-III                      | OS=Homo sapiens GN=EIF4A3   | PE=1 SV=4 | IF4A3_HUMAN  | 46,872.40  | 95.00%  | 1  | 1   | 1   | 3.16%  |
| c(-)-Tiva2 | Unconventional myosin-Ie                                 | OS=Homo sapiens GN=MYO1E    | PE=1 SV=2 | MYO1E_HUMAN  | 127,066.30 | 100.00% | 3  | 3   | 4   | 3.07%  |
| c(-)-Tiva2 | Myosin light polypeptide 6                               | OS=Homo sapiens GN=MYL6     | PE=1 SV=2 | MYL6_HUMAN   | 16,929.80  | 100.00% | 4  | 5   | 5   | 31.80% |
| c(-)-Tiva2 | Tubulin beta-4A chain                                    | OS=Homo sapiens GN=TUBB4A   | PE=1 SV=2 | TBB4A_HUMAN  | 49,585.50  | 94.40%  | 1  | 2   | 2   | 3.38%  |
| c(-)-Tiva2 | Long-chain-fatty-acyl-CoA ligase 3                       | OS=Homo sapiens GN=ACSL3    | PE=1 SV=3 | ACSL3_HUMAN  | 80,423.10  | 100.00% | 2  | 2   | 2   | 4.44%  |
| c(-)-Tiva2 | Histone deacetylase 10                                   | OS=Homo sapiens GN=HDAC10   | PE=1 SV=1 | HDA10_HUMAN  | 71,444.80  | 99.80%  | 1  | 1   | 1   | 2.99%  |
| c(-)-Tiva2 | Dynein light chain 1, cytoplasmic                        | OS=Homo sapiens GN=DNYL1    | PE=1 SV=1 | DYL1_HUMAN   | 10,366.10  | 88.40%  | 1  | 1   | 1   | 24.70% |
| c(-)-Tiva2 | Cytosin-A                                                | OS=Homo sapiens GN=SPECCL1  | PE=1 SV=2 | CYTS_A_HUMAN | 124,605.40 | 100.00% | 4  | 4   | 4   | 3.76%  |
| c(-)-Tiva2 | Src substrate cortactin                                  | OS=Homo sapiens GN=CTTN     | PE=1 SV=2 | SRC8_HUMAN   | 61,585.50  | 100.00% | 9  | 9   | 9   | 22.00% |
| c(-)-Tiva2 | Polyadenylate-binding protein 2                          | OS=Homo sapiens GN=PABPN1   | PE=1 SV=3 | PABP2_HUMAN  | 32,749.50  | 95.00%  | 1  | 1   | 1   | 6.54%  |
| c(-)-Tiva2 | Heterogeneous nuclear ribonucleoprotein U-like protein 2 | OS=Homo sapiens GN=HNRNPUL2 | PE=1 SV=1 | HNRL2_HUMAN  | 85,105.20  | 100.00% | 10 | 10  | 10  | 18.90% |
| c(-)-Tiva2 | 60S ribosomal protein L10a                               | OS=Homo sapiens GN=RPL10A   | PE=1 SV=2 | RL10A_HUMAN  | 24,832.00  | 51.30%  | 1  | 1   | 1   | 3.69%  |
| c(-)-Tiva2 | General transcription factor 3C polypeptide 4            | OS=Homo sapiens GN=GTFC4    | PE=1 SV=2 | TF3C4_HUMAN  | 91,983.00  | 59.20%  | 1  | 1   | 1   | 2.43%  |
| c(-)-Tiva2 | Lysine-tRNA ligase                                       | OS=Homo sapiens GN=KARS     | PE=1 SV=3 | SYK_HUMAN    | 68,050.40  | 90.80%  | 0  | 0   | 0   | 0.00%  |
| c(-)-Tiva2 | Glutamate dehydrogenase 1, mitochondrial                 | OS=Homo sapiens GN=GLUD1    | PE=1 SV=2 | DHE3_HUMAN   | 61,399.70  | 100.00% | 11 | 12  | 13  | 28.00% |
| c(-)-Tiva2 | Serine/arginine-rich splicing factor 7                   | OS=Homo sapiens GN=SRSF7    | PE=1 SV=1 | SRSF7_HUMAN  | 27,367.50  | 96.90%  | 1  | 1   | 1   | 3.78%  |
| c(-)-Tiva2 | Cation-independent mannose-6-phosphate receptor          | OS=Homo sapiens GN=IGF2R    | PE=1 SV=3 | MPRI_HUMAN   | 274,372.70 | 26.20%  | 0  | 0   | 0   | 0.00%  |
| c(-)-Tiva2 | Aldo-keto reductase family 1 member C1                   | OS=Homo sapiens GN=AKR1C1   | PE=1 SV=1 | AK1C1_HUMAN  | 36,789.10  | 100.00% | 2  | 2   | 3   | 9.60%  |
| c(-)-Tiva2 | Nesprin-2                                                | OS=Homo sapiens GN=SYNE2    | PE=1 SV=3 | SYNE2_HUMAN  | 796,453.70 | 100.00% | 13 | 13  | 13  | 2.51%  |
| c(-)-Tiva2 | Elongation factor Tu, mitochondrial                      | OS=Homo sapiens GN=TUFM     | PE=1 SV=2 | EFTU_HUMAN   | 49,542.40  | 100.00% | 6  | 6   | 6   | 19.90% |
| c(-)-Tiva2 | Tropomyosin alpha-3 chain                                | OS=Homo sapiens GN=TPM3     | PE=1 SV=1 | TPM3_HUMAN   | 32,820.20  | 100.00% | 2  | 2   | 2   | 10.90% |
| c(-)-Tiva2 | Fatty acid synthase                                      | OS=Homo sapiens GN=FASN     | PE=1 SV=3 | FAS_HUMAN    | 273,427.10 | 100.00% | 3  | 3   | 4   | 1.75%  |
| c(-)-Tiva2 | Keratin, type I cuticular Ha1                            | OS=Homo sapiens GN=KRT31    | PE=2 SV=3 | K1H1_HUMAN   | 47,236.80  | 99.70%  | 1  | 1   | 1   | 2.16%  |
| c(-)-Tiva2 | Ubiquitin-60S ribosomal protein L40                      | OS=Homo sapiens GN=UBA52    | PE=1 SV=2 | RL40_HUMAN   | 14,728.90  | 100.00% | 1  | 1   | 1   | 12.50% |
| c(-)-Tiva2 | X-ray repair cross-complementing protein 5               | OS=Homo sapiens GN=XRCC5    | PE=1 SV=3 | XRCC5_HUMAN  | 82,707.10  | 100.00% | 1  | 1   | 1   | 1.37%  |
| c(-)-Tiva2 | Polypyrimidine tract-binding protein 1                   | OS=Homo sapiens GN=PTBP1    | PE=1 SV=1 | PTBP1_HUMAN  | 57,222.50  | 100.00% | 2  | 2   | 2   | 4.52%  |
| c(-)-Tiva2 | 60S ribosomal protein L12                                | OS=Homo sapiens GN=RPL12    | PE=1 SV=1 | RL12_HUMAN   | 17,819.10  | 100.00% | 2  | 2   | 2   | 18.80% |
| c(-)-Tiva2 | Tubulin beta-2A chain                                    | OS=Homo sapiens GN=TUBB2A   | PE=1 SV=1 | TBB2A_HUMAN  | 49,907.10  | 100.00% | 5  | 7   | 7   | 13.50% |
| c(-)-Tiva2 | Myosin-11                                                | OS=Homo sapiens GN=MYH11    | PE=1 SV=3 | MYH11_HUMAN  | 227,344.60 | 100.00% | 10 | 11  | 12  | 4.97%  |
| c(-)-Tiva2 | 40S ribosomal protein S4, X isoform                      | OS=Homo sapiens GN=RP54X    | PE=1 SV=2 | RS4X_HUMAN   | 29,599.30  | 100.00% | 2  | 2   | 2   | 9.89%  |
| c(-)-Tiva2 | Keratin, type I cytoskeletal 17                          | OS=Homo sapiens GN=KRT17    | PE=1 SV=2 | K1C17_HUMAN  | 48,106.70  | 100.00% | 5  | 5   | 5   | 9.72%  |
| c(-)-Tiva2 | Coatomer subunit alpha                                   | OS=Homo sapiens GN=COPA     | PE=1 SV=2 | COPA_HUMAN   | 138,349.30 | 28.40%  | 0  | 0   | 0   | 0.00%  |
| c(-)-Tiva2 | Sarcoplasmic/endoplasmic reticulum calcium ATPase 1      | OS=Homo sapiens GN=ATP2A1   | PE=1 SV=1 | AT2A1_HUMAN  | 110,254.90 | 95.00%  | 1  | 1   | 1   | 1.50%  |
| c(-)-Tiva2 | Pericentriolar material 1 protein                        | OS=Homo sapiens GN=PCM1     | PE=1 SV=4 | PCM1_HUMAN   | 228,531.50 | 95.00%  | 1  | 1   | 1   | 0.54%  |
| c(-)-Tiva2 | Unconventional myosin-Vb                                 | OS=Homo sapiens GN=MYO5B    | PE=1 SV=3 | MYO5B_HUMAN  | 213,676.50 | 100.00% | 8  | 8   | 8   | 6.33%  |
| c(-)-Tiva2 | 40S ribosomal protein S5                                 | OS=Homo sapiens GN=RP55     | PE=1 SV=4 | RS5_HUMAN    | 22,877.00  | 87.90%  | 1  | 1   | 1   | 7.35%  |
| c(-)-Tiva2 | Heat shock 70 kDa protein 1A/1B                          | OS=Homo sapiens GN=HSPA1A   | PE=1 SV=5 | HSP71_HUMAN  | 70,054.00  | 100.00% | 3  | 4   | 4   | 6.71%  |
| c(-)-Tiva2 | Cofilin-2                                                | OS=Homo sapiens GN=CFI2     | PE=1 SV=1 | COF2_HUMAN   | 18,737.30  | 80.50%  | 1  | 1   | 1   | 12.00% |
| c(-)-Tiva2 | GMP synthase [glutamine-hydrolyzing]                     | OS=Homo sapiens GN=GMPS     | PE=1 SV=1 | GUAA_HUMAN   | 76,716.70  | 6.20%   | 0  | 0   | 0   | 0.00%  |
| c(-)-Tiva2 | Early endosome antigen 1                                 | OS=Homo sapiens GN=EEA1     | PE=1 SV=2 | EEA1_HUMAN   | 162,468.10 | 99.80%  | 2  | 2   | 2   | 3.12%  |
| c(-)-Tiva2 | Single-stranded DNA-binding protein, mitochondrial       | OS=Homo sapiens GN=SSBP1    | PE=1 SV=1 | SSBP_HUMAN   | 17,259.70  | 95.00%  | 1  | 1   | 1   | 10.10% |
| c(-)-Tiva2 | Cysteine desulfurase, mitochondrial                      | OS=Homo sapiens GN=NFS1     | PE=1 SV=3 | NFS1_HUMAN   | 50,196.10  | 58.70%  | 1  | 1   | 1   | 4.16%  |
| c(-)-Tiva2 | Arginine-tRNA ligase, cytoplasmic                        | OS=Homo sapiens GN=RARS     | PE=1 SV=2 | SYRC_HUMAN   | 75,382.00  | 90.70%  | 1  | 1   | 1   | 2.42%  |
| c(-)-Tiva2 | Erythrocyte band 7 integral membrane protein             | OS=Homo sapiens GN=STOM     | PE=1 SV=3 | STOM_HUMAN   | 31,732.10  | 100.00% | 2  | 2   | 3   | 10.80% |
| c(-)-Tiva2 | Heterogeneous nuclear ribonucleoprotein H3               | OS=Homo sapiens GN=HNRNP3   | PE=1 SV=2 | HNHR3_HUMAN  | 36,927.60  | 100.00% | 3  | 3   | 3   | 12.40% |
| c(-)-Tiva2 | Fragile X mental retardation syndrome-related protein 1  | OS=Homo sapiens GN=FXR1     | PE=1 SV=3 | FXR1_HUMAN   | 69,720.90  | 93.20%  | 1  | 1   | 1   | 2.90%  |
| c(-)-Tiva2 | Splicing factor 3B subunit 1                             | OS=Homo sapiens GN=SF3B1    | PE=1 SV=3 | SF3B1_HUMAN  | 145,835.30 | 100.00% | 2  | 2   | 2   | 1.92%  |
| c(-)-Tiva2 | Heat shock protein HSP 90-beta                           | OS=Homo sapiens GN=HSP90AB1 | PE=1 SV=4 | HS90B_HUMAN  | 83,267.30  | 100.00% | 1  | 1   | 1   | 4.42%  |
| c(-)-Tiva2 | Apelin receptor                                          | OS=Homo sapiens GN=APLNR    | PE=1 SV=1 | APJ_HUMAN    | 42,661.10  | 49.30%  | 1  | 1   | 1   | 2.11%  |
| c(-)-Tiva2 | Heterogeneous nuclear ribonucleoproteins C1/C2           | OS=Homo sapiens GN=HNRNPC   | PE=1 SV=4 | HNRPC_HUMAN  | 33,670.50  | 100.00% | 3  | 4   | 4   | 12.40% |
| c(-)-Tiva2 | Periplakin                                               | OS=Homo sapiens GN=PPL      | PE=1 SV=4 | PEPL_HUMAN   | 204,747.20 | 100.00% | 25 | 25  | 27  | 19.70% |
| c(-)-Tiva2 | 78 kDa glucose-regulated protein                         | OS=Homo sapiens GN=HSPA5    | PE=1 SV=2 | GRP78_HUMAN  | 72,334.70  | 100.00% | 16 | 16  | 16  | 32.10% |
| c(-)-Tiva2 | Heterogeneous nuclear ribonucleoprotein M                | OS=Homo sapiens GN=HNRNPM   | PE=1 SV=3 | HNRP_M_HUMAN | 77,517.30  | 100.00% | 5  | 5   | 5   | 10.10% |
| c(-)-Tiva2 | Myosin-10                                                | OS=Homo sapiens GN=MYH10    | PE=1 SV=3 | MYH10_HUMAN  | 229,005.30 | 100.00% | 38 | 49  | 51  | 23.40% |
| c(-)-Tiva2 | 60S acidic ribosomal protein P1                          | OS=Homo sapiens GN=RPLP1    | PE=1 SV=1 | RLA1_HUMAN   | 11,514.10  | 93.30%  | 1  | 1   | 1   | 14.00% |
| c(-)-Tiva2 | Tumor-associated calcium signal transducer 2             | OS=Homo sapiens GN=TACSTD2  | PE=1 SV=3 | TACD2_HUMAN  | 35,709.80  | 95.00%  | 1  | 1   | 1   | 4.95%  |
| c(-)-Tiva2 | Unconventional myosin-Id                                 | OS=Homo sapiens GN=MYO1D    | PE=1 SV=2 | MYO1D_HUMAN  | 116,206.20 | 100.00% | 2  | 2   | 2   | 2.49%  |
| c(-)-Tiva2 | Glucose-6-phosphate 1-dehydrogenase                      | OS=Homo sapiens GN=GGPD     | PE=1 SV=4 | GGPD_HUMAN   | 59,258.10  | 17.10%  | 0  | 0   | 0   | 0.00%  |
| c(-)-Tiva2 | Far upstream element-binding protein 2                   | OS=Homo sapiens GN=KHRSR    | PE=1 SV=4 | FUBP2_HUMAN  | 73,115.60  | 73.40%  | 1  | 1   | 1   | 1.83%  |
| c(-)-Tiva2 | Eukaryotic translation initiation factor 3 subunit 8     | OS=Homo sapiens GN=EIF3B    | PE=1 SV=3 | EIF3B_HUMAN  | 92,482.80  | 100.00% | 2  | 2   | 2   | 3.19%  |
| c(-)-Tiva2 | Fliotilin-1                                              | OS=Homo sapiens GN=FLT1     | PE=1 SV=3 | FLOT1_HUMAN  | 47,354.80  | 100.00% | 4  | 4   | 4   | 12.60% |
| c(-)-Tiva2 | Retinoic acid-induced protein 3                          | OS=Homo sapiens GN=GPCR5A   | PE=1 SV=2 | RAI3_HUMAN   | 40,252.60  | 78.40%  | 1  | 1   | 1   | 3.64%  |
| c(-)-Tiva2 | AP-2 complex subunit alpha-2                             | OS=Homo sapiens GN=AP2A2    | PE=1 SV=2 | AP2A2_HUMAN  | 103,962.80 | 8.70%   | 0  | 0   | 0   | 0.00%  |
| c(-)-Tiva2 | Cofilin-1                                                | OS=Homo sapiens GN=CFI1     | PE=1 SV=3 | COF1_HUMAN   | 18,503.20  | 80.00%  | 1  | 1   | 1   | 8.43%  |
| c(-)-Tiva2 | Transferrin receptor protein 1                           | OS=Homo sapiens GN=TFRC     | PE=1 SV=2 | TRF1_HUMAN   | 84,873.60  | 100.00% | 8  | 8   | 8   | 13.30% |
| c(-)-Tiva2 | Nuclear pore complex protein Nup85                       | OS=Homo sapiens GN=NUP85    | PE=1 SV=1 | NUP85_HUMAN  | 75,022.60  | 99.30%  | 1  | 1   | 1   | 2.74%  |
| c(-)-Tiva2 | Dynamitin-like 120 kDa protein, mitochondrial            | OS=Homo sapiens GN=OPA1     | PE=1 SV=3 | OPA1_HUMAN   | 111,633.90 | 100.00% | 14 | 14  | 14  | 18.30% |
| c(-)-Tiva2 | Splicing factor 3A subunit 1                             | OS=Homo sapiens GN=SF3A1    | PE=1 SV=1 | SF3A1_HUMAN  | 88,886.10  | 100.00% | 1  | 1   | 1   | 1.64%  |
| c(-)-Tiva2 | Polyadenylate-binding protein 1                          | OS=Homo sapiens GN=PABPC1   | PE=1 SV=2 | PABP1_HUMAN  | 70,671.30  | 100.00% | 5  | 5   | 5   | 9.43%  |
| c(-)-Tiva2 | Catenin delta-1                                          | OS=Homo sapiens GN=CTNND1   | PE=1 SV=1 | CTND1_HUMAN  | 108,171.90 | 100.00% | 6  | 7   | 7   | 10.00% |
| c(-)-Tiva2 | ATP synthase subunit beta, mitochondrial                 | OS=Homo sapiens GN=ATP5B    | PE=1 SV=3 | ATP5B_HUMAN  | 56,560.60  | 100.00% | 5  | 5   | 5   | 14.00% |
| c(-)-Tiva2 | Leucine-rich repeat flightless-interacting protein 2     | OS=Homo sapiens GN=LRRFIP2  | PE=1 SV=1 | LRRF2_HUMAN  | 82,174.50  | 100.00% | 3  | 3   | 3   | 6.24%  |
| c(-)-Tiva2 | N6-adenosine-methyltransferase 70 kDa subunit            | OS=Homo sapiens GN=METT13   | PE=1 SV=2 | MTA70_HUMAN  | 64,475.00  | 95.00%  | 1  | 1   | 1   | 3.10%  |
| c(-)-Tiva2 | Heterogeneous nuclear ribonucleoprotein H2               | OS=Homo sapiens GN=HNRNP2   | PE=1 SV=1 | HNHR2_HUMAN  | 49,264.10  | 41.80%  | 0  | 0   | 0   | 0.00%  |
| c(-)-Tiva2 | T-complex protein 1 subunit alpha                        | OS=Homo sapiens GN=TCAP     | PE=1 SV=1 | TCAP_HUMAN   | 60,345.20  | 61.60%  | 1  | 1   | 1   | 4.14%  |
| c(-)-Tiva2 | Plakophilin-2                                            | OS=Homo sapiens GN=PKP2     | PE=1 SV=2 | PKP2_HUMAN   | 97,416.50  | 100.00% | 2  | 2   | 2   | 5.22%  |
| c(-)-Tiva2 | Sequestosome-1                                           | OS=Homo sapiens GN=SQSTM1   | PE=1 SV=1 | SQSTM_HUMAN  | 47,687.40  | 100.00% | 2  | 2   | 2   | 9.32%  |
| c(-)-Tiva2 | Protein lunapark                                         | OS=Homo sapiens GN=LNP      | PE=1 SV=2 | LNP_HUMAN    | 47,740.90  | 56.80%  | 1  | 1   | 1   | 3.27%  |
| c(-)-Tiva2 | CD109 antigen                                            | OS=Homo sapiens GN=CD109    | PE=1 SV=2 | CD109_HUMAN  | 161,692.20 | 99.60%  | 1  | 1   | 1   | 0.90%  |
| c(-)-Tiva2 | Drebrin                                                  | OS=Homo sapiens GN=DBN1     | PE=1 SV=4 | DREB_HUMAN   | 71,428.60  | 100.00% | 19 | 24  | 24  | 35.00% |
| c(-)-Tiva2 | Unconventional myosin-XIX                                | OS=Homo sapiens GN=MYO19    | PE=2 SV=2 | MYO19_HUMAN  | 109,136.20 | 100.00% | 3  | 3   | 3   | 3.92%  |
| c(-)-Tiva2 | Leucine-rich PPR motif-containing protein, mitochondrial | OS=Homo sapiens GN=LRPPRC   | PE=1 SV=3 | LRPPRC_HUMAN | 157,912.20 | 100.00% | 5  | 5   | 5   | 4.45%  |
| c(-)-Tiva2 | Unconventional myosin-Va                                 | OS=Homo sapiens GN=MYO5A    | PE=1 SV=2 | MYO5A_HUMAN  | 215,412.60 | 100.00% | 10 | 10  | 10  | 7.01%  |
| c(-)-Tiva2 | 60 kDa heat shock protein, mitochondrial                 | OS=Homo sapiens GN=HSPD1    | PE=1 SV=2 | CH60_HUMAN   | 61,055.70  | 100.00% | 6  | 6   | 6   | 14.80% |
| c(-)-Tiva2 | Unconventional myosin-Ic                                 | OS=Homo sapiens GN=MYO1C    | PE=1 SV=4 | MYO1C_HUMAN  | 121,684.90 | 100.00% | 27 | 28  | 30  | 28.70% |
| c(-)-Tiva2 | Non-POU domain-containing octamer-binding protein        | OS=Homo sapiens GN=NONO     | PE=1 SV=4 | NONO_HUMAN   | 54,231.60  | 91.60%  | 1  | 1   | 1   | 2.97%  |
| c(-)-Tiva2 | DnaJ homolog subfamily C member 13                       | OS=Homo sapiens GN=DNAJC13  | PE=1 SV=5 | DJC13_HUMAN  | 254,422.90 | 99.80%  | 1  | 1   | 1   | 0.67%  |
| c(-)-Tiva2 | Protein disulfide-isomerase A6                           | OS=Homo sapiens GN=PDI6     | PE=1 SV=1 | PDI6_HUMAN   | 48,122.30  | 100.00% | 3  | 3   | 3   | 9.55%  |
| c(-)-Tiva2 | Spectrin alpha chain, erythrocytic                       | OS=Homo sapiens GN=SPTA1    | PE=1 SV=5 | SPTA1_HUMAN  | 280,019.00 | 6.20%   | 0  | 0   | 0   | 0.00%  |
| c(-)-Tiva2 | Annexin A2                                               | OS=Homo sapiens GN=ANXA2    | PE=1 SV=2 | ANXA2_HUMAN  | 38,606.10  | 100.00% | 11 | 12  | 13  | 37.20% |
| c(-)-Tiva2 | 26S proteasome non-ATPase regulatory subunit 2           | OS=Homo sapiens GN=PSMD2    | PE=1 SV=3 | PSMD2_HUMAN  | 100,202.20 | 73.30%  | 1  | 1   | 1   | 0.99%  |
| c(-)-Tiva2 | Glycogen synthase kinase-3 beta                          | OS=Homo sapiens GN=GSK3B    | PE=1 SV=2 | GSK3B_HUMAN  | 46,745.30  | 100.00% | 7  | 9   | 10  | 25.70% |
| c(-)-Tiva2 | Protein phosphatase 1 regulatory subunit 12A             | OS=Homo sapiens GN=PPP1R12A | PE=1 SV=1 | MYPT1_HUMAN  | 115,283.40 | 100.00% | 2  | 2   | 2   | 2.33%  |
| (+)-Tiva1  | Unconventional myosin-VI                                 | OS=Homo sapiens GN=MYO6     | PE=1 SV=4 | MYO6_HUMAN   | 149,697.10 | 100.00% | 13 | 14  | 14  | 17.70% |
| (+)-Tiva1  | Prelamin-A/C                                             | OS=Homo sapiens GN=LMNA     | PE=1 SV=1 | LMNA_HUMAN   | 74,140.70  | 100.00% | 14 | 14  | 14  | 28.30% |
| (+)-Tiva1  | Heterogeneous nuclear ribonucleoprotein A1               | OS=Homo sapiens GN=HNRNP1   | PE=1 SV=5 | ROA1_HUMAN   | 38,747.00  | 100.00% | 4  | 4   | 4   | 17.50% |
| (+)-Tiva1  | F-actin-capping protein subunit alpha-2                  | OS=Homo sapiens GN=CAPZA2   | PE=1 SV=3 | CAZA2_HUMAN  | 32,949.20  | 100.00% | 2  | 2   | 2   | 20.60% |
| (+)-Tiva1  | N6-adenosine-methyltransferase 70 kDa subunit            | OS=Homo sapiens GN=METT13   | PE=1 SV=2 | MTA70_HUMAN  | 64,475.00  | 94.30%  | 1  | 1   | 1   | 3.10%  |
| (+)-Tiva1  | DNA replication licensing factor MCM7                    | OS=Homo sapiens GN=MCM7     | PE=1 SV=4 | MCM7_HUMAN   | 81,309.00  | 72.20%  | 1  | 1   | 1   | 3.06%  |
| (+)-Tiva1  | Myosin-14                                                | OS=Homo sapiens GN=MYH14    | PE=1 SV=2 | MYH14_HUMAN  | 227,872.60 | 100.00% | 95 | 117 | 123 | 49.30% |
| (+)-Tiva1  | A-kinase anchor protein 2                                | OS=Homo sapiens GN=AKAP2    | PE=1 SV=3 | AKAP2_HUMAN  | 94,660.90  | 100.00% | 4  | 4   | 4   | 12.00% |
| (+)-Tiva1  | 60S ribosomal protein L5                                 | OS=Homo sapiens GN=RPL5     | PE=1 SV=3 | RL5_HUMAN    | 34,363.50  | 100.00% | 3  | 3   | 3   | 14.80% |
| (+)-Tiva1  | Neutral amino acid transporter B(0)                      | OS=Homo sapiens GN=         |           |              |            |         |    |     |     |        |

|            |                                                                                                       |              |            |         |     |     |     |        |
|------------|-------------------------------------------------------------------------------------------------------|--------------|------------|---------|-----|-----|-----|--------|
| c(+)-Tiva1 | LIM domain and actin-binding protein 1 OS=Homo sapiens GN=LIMA1 PE=1 SV=1                             | LIMA1_HUMAN  | 85,226.30  | 100.00% | 31  | 35  | 35  | 52.70% |
| c(+)-Tiva1 | Elongation factor 2 OS=Homo sapiens GN=EEF2 PE=1 SV=4                                                 | EF2_HUMAN    | 95,340.10  | 100.00% | 7   | 7   | 7   | 14.80% |
| c(+)-Tiva1 | Asparagine synthetase [glutamine-hydrolyzing] OS=Homo sapiens GN=ASNS PE=1 SV=4                       | ASNS_HUMAN   | 64,371.70  | 67.00%  | 1   | 1   | 1   | 3.57%  |
| c(+)-Tiva1 | Junction plakoglobin OS=Homo sapiens GN=JUP PE=1 SV=3                                                 | PLAK_HUMAN   | 81,745.90  | 100.00% | 6   | 7   | 7   | 16.50% |
| c(+)-Tiva1 | Keratin, type II cytoskeletal 8 OS=Homo sapiens GN=KRT8 PE=1 SV=7                                     | K2C8_HUMAN   | 53,706.20  | 100.00% | 25  | 29  | 29  | 52.20% |
| c(+)-Tiva1 | Single-stranded DNA-binding protein, mitochondrial OS=Homo sapiens GN=SSBP1 PE=1 SV=1                 | SSBP_HUMAN   | 17,259.70  | 88.00%  | 1   | 1   | 1   | 10.10% |
| c(+)-Tiva1 | E3 SUMO-protein ligase RanBP2 OS=Homo sapiens GN=RNBP2 PE=1 SV=2                                      | RBP2_HUMAN   | 358,198.20 | 100.00% | 9   | 9   | 9   | 5.02%  |
| c(+)-Tiva1 | Keratin, type I cytoskeletal 19 OS=Homo sapiens GN=KRT19 PE=1 SV=4                                    | K1C19_HUMAN  | 44,107.10  | 100.00% | 23  | 26  | 30  | 59.20% |
| c(+)-Tiva1 | Unconventional myosin-Ic OS=Homo sapiens GN=MYO1C PE=1 SV=4                                           | MYO1C_HUMAN  | 121,684.90 | 100.00% | 17  | 17  | 17  | 24.70% |
| c(+)-Tiva1 | Gelsolin OS=Homo sapiens GN=GSN PE=1 SV=1                                                             | GELS_HUMAN   | 85,697.80  | 100.00% | 15  | 15  | 15  | 39.50% |
| c(+)-Tiva1 | 40S ribosomal protein S3 OS=Homo sapiens GN=RPS3 PE=1 SV=2                                            | RS3_HUMAN    | 26,688.60  | 100.00% | 5   | 6   | 6   | 26.70% |
| c(+)-Tiva1 | Tubulin alpha-1C chain OS=Homo sapiens GN=TUBA1C PE=1 SV=1                                            | TBA1C_HUMAN  | 49,895.50  | 100.00% | 2   | 2   | 2   | 9.13%  |
| c(+)-Tiva1 | Transmembrane emp24 domain-containing protein 4 OS=Homo sapiens GN=TMED4 PE=1 SV=1                    | TMED4_HUMAN  | 25,943.10  | 90.70%  | 1   | 1   | 1   | 7.49%  |
| c(+)-Tiva1 | 60S ribosomal protein L27a OS=Homo sapiens GN=RPL27A PE=1 SV=2                                        | RL27A_HUMAN  | 16,561.40  | 95.50%  | 1   | 1   | 1   | 14.90% |
| c(+)-Tiva1 | Actin-related protein 2/3 complex subunit 3 OS=Homo sapiens GN=ARPC3 PE=1 SV=3                        | ARPC3_HUMAN  | 20,547.80  | 99.80%  | 1   | 1   | 1   | 6.18%  |
| c(+)-Tiva1 | Cathepsin D OS=Homo sapiens GN=CTSD PE=1 SV=1                                                         | CATD_HUMAN   | 44,553.00  | 100.00% | 6   | 6   | 6   | 21.40% |
| c(+)-Tiva1 | NAD(P)H dehydrogenase [quinone] 1 OS=Homo sapiens GN=NQO1 PE=1 SV=1                                   | NQO1_HUMAN   | 30,869.00  | 100.00% | 2   | 2   | 2   | 8.39%  |
| c(+)-Tiva1 | RuvB-like 2 OS=Homo sapiens GN=RUVBL2 PE=1 SV=3                                                       | RUVB2_HUMAN  | 51,158.10  | 100.00% | 3   | 3   | 3   | 9.94%  |
| c(+)-Tiva1 | Katanin p60 ATPase-containing subunit A-like 2 OS=Homo sapiens GN=KATNAL2 PE=1 SV=3                   | KATL2_HUMAN  | 61,255.10  | 47.70%  | 0   | 0   | 0   | 0.00%  |
| c(+)-Tiva1 | Atlastin-3 OS=Homo sapiens GN=ATL3 PE=1 SV=1                                                          | ATLA3_HUMAN  | 60,543.20  | 22.80%  | 0   | 0   | 0   | 0.00%  |
| c(+)-Tiva1 | HLA class I histocompatibility antigen, A-1 alpha chain OS=Homo sapiens GN=HLA-A PE=1 SV=1            | IA01_HUMAN   | 40,845.80  | 56.90%  | 1   | 1   | 1   | 3.56%  |
| c(+)-Tiva1 | 5'-3' exonuclease 2 OS=Homo sapiens GN=XRN2 PE=1 SV=1                                                 | XRN2_HUMAN   | 108,585.70 | 99.60%  | 1   | 1   | 1   | 2.53%  |
| c(+)-Tiva1 | Villin-like protein OS=Homo sapiens GN=VILL PE=2 SV=3                                                 | VILL_HUMAN   | 95,907.80  | 100.00% | 3   | 3   | 3   | 6.43%  |
| c(+)-Tiva1 | Protein unc-45 homolog A OS=Homo sapiens GN=UNC45A PE=1 SV=1                                          | UN45A_HUMAN  | 103,078.90 | 95.50%  | 1   | 1   | 1   | 1.59%  |
| c(+)-Tiva1 | Ras-related protein Rab-7a OS=Homo sapiens GN=RAB7A PE=1 SV=1                                         | RAB7A_HUMAN  | 23,490.00  | 100.00% | 2   | 2   | 2   | 15.50% |
| c(+)-Tiva1 | Protein disulfide-isomerase A3 OS=Homo sapiens GN=PDI A3 PE=1 SV=4                                    | PDI A3_HUMAN | 56,784.60  | 100.00% | 15  | 16  | 16  | 39.00% |
| c(+)-Tiva1 | Golgin subfamily 8 member 1 OS=Homo sapiens GN=GOLGB1 PE=1 SV=2                                       | GOGB1_HUMAN  | 376,017.80 | 97.60%  | 0   | 0   | 0   | 0.00%  |
| c(+)-Tiva1 | L-lactate dehydrogenase A-like 6A OS=Homo sapiens GN=LDHA L6A PE=2 SV=1                               | LDH6A_HUMAN  | 36,508.40  | 95.30%  | 1   | 1   | 1   | 3.61%  |
| c(+)-Tiva1 | Exportin 1 OS=Homo sapiens GN=XPO1 PE=1 SV=1                                                          | XPO1_HUMAN   | 123,388.90 | 100.00% | 6   | 6   | 6   | 8.87%  |
| c(+)-Tiva1 | Phosphoglycerate mutase 1 OS=Homo sapiens GN=PGAM1 PE=1 SV=2                                          | PGAM1_HUMAN  | 28,804.80  | 99.80%  | 1   | 1   | 1   | 8.27%  |
| c(+)-Tiva1 | Tropomyosin alpha-4 chain OS=Homo sapiens GN=TPM4 PE=1 SV=3                                           | TPM4_HUMAN   | 28,522.40  | 95.50%  | 1   | 1   | 1   | 8.06%  |
| c(+)-Tiva1 | DnaJ homolog subfamily A member 1 OS=Homo sapiens GN=DNAJ A1 PE=1 SV=2                                | DNAJ1_HUMAN  | 44,868.60  | 94.20%  | 1   | 1   | 1   | 3.27%  |
| c(+)-Tiva1 | Tropomyosin alpha-3 chain OS=Homo sapiens GN=TPM3 PE=1 SV=1                                           | TPM3_HUMAN   | 32,820.20  | 100.00% | 3   | 5   | 5   | 15.50% |
| c(+)-Tiva1 | Cell division cycle and apoptosis regulator protein 1 OS=Homo sapiens GN=CCAR1 PE=1 SV=2              | CCAR1_HUMAN  | 132,823.70 | 100.00% | 2   | 2   | 2   | 4.61%  |
| c(+)-Tiva1 | 40S ribosomal protein S14 OS=Homo sapiens GN=RPS14 PE=1 SV=3                                          | RS14_HUMAN   | 16,272.90  | 97.80%  | 1   | 1   | 1   | 7.28%  |
| c(+)-Tiva1 | Rab GDP dissociation inhibitor alpha OS=Homo sapiens GN=GD I1 PE=1 SV=2                               | GDIA_HUMAN   | 50,584.10  | 95.50%  | 1   | 1   | 1   | 4.25%  |
| c(+)-Tiva1 | Tubulin beta-4B chain OS=Homo sapiens GN=TUBB4B PE=1 SV=1                                             | TBB4B_HUMAN  | 49,830.70  | 95.50%  | 1   | 1   | 1   | 2.70%  |
| c(+)-Tiva1 | Heterogeneous nuclear ribonucleoprotein A3 OS=Homo sapiens GN=HNRNP A3 PE=1 SV=2                      | ROA3_HUMAN   | 39,595.10  | 100.00% | 2   | 2   | 2   | 11.40% |
| c(+)-Tiva1 | Splicing factor U2AF 65 kDa subunit OS=Homo sapiens GN=U2AF2 PE=1 SV=4                                | U2AF2_HUMAN  | 53,501.20  | 95.50%  | 1   | 1   | 1   | 4.63%  |
| c(+)-Tiva1 | Ataxin-2-like protein OS=Homo sapiens GN=ATXN2L PE=1 SV=2                                             | ATX2L_HUMAN  | 113,372.50 | 83.20%  | 1   | 1   | 1   | 1.95%  |
| c(+)-Tiva1 | Heterogeneous nuclear ribonucleoproteins A2/B1 OS=Homo sapiens GN=HNRNP A2B1 PE=1 SV=2                | ROA2_HUMAN   | 37,430.30  | 100.00% | 4   | 4   | 4   | 18.70% |
| c(+)-Tiva1 | 60S ribosomal protein L22 OS=Homo sapiens GN=RPL22 PE=1 SV=2                                          | RL22_HUMAN   | 14,787.30  | 95.50%  | 1   | 1   | 1   | 20.30% |
| c(+)-Tiva1 | Epithelial cell adhesion molecule OS=Homo sapiens GN=EPCAM PE=1 SV=2                                  | EPCAM_HUMAN  | 34,932.30  | 100.00% | 3   | 3   | 3   | 16.60% |
| c(+)-Tiva1 | Aconitate hydratase, mitochondrial OS=Homo sapiens GN=ACO2 PE=1 SV=2                                  | ACON_HUMAN   | 85,428.00  | 100.00% | 3   | 3   | 3   | 10.80% |
| c(+)-Tiva1 | Actin-related protein 3 OS=Homo sapiens GN=ACTR3 PE=1 SV=3                                            | ARP3_HUMAN   | 47,371.90  | 100.00% | 6   | 7   | 7   | 23.40% |
| c(+)-Tiva1 | Alpha-actinin-1 OS=Homo sapiens GN=ACTN1 PE=1 SV=2                                                    | ACTN1_HUMAN  | 103,061.10 | 100.00% | 17  | 18  | 19  | 25.20% |
| c(+)-Tiva1 | 60S ribosomal protein L4 OS=Homo sapiens GN=RPL4 PE=1 SV=5                                            | RL4_HUMAN    | 47,699.10  | 20.80%  | 0   | 0   | 0   | 0.00%  |
| c(+)-Tiva1 | Coatomer subunit gamma-1 OS=Homo sapiens GN=COPG1 PE=1 SV=1                                           | COPG1_HUMAN  | 97,719.40  | 95.50%  | 1   | 1   | 1   | 1.83%  |
| c(+)-Tiva1 | Actin-related protein 2 OS=Homo sapiens GN=ACTR2 PE=1 SV=1                                            | ARP2_HUMAN   | 44,761.70  | 100.00% | 4   | 4   | 4   | 11.70% |
| c(+)-Tiva1 | Glutamine-tRNA ligase OS=Homo sapiens GN=QARS PE=1 SV=1                                               | SYQ_HUMAN    | 87,799.90  | 100.00% | 2   | 2   | 2   | 3.74%  |
| c(+)-Tiva1 | Protein flightless-1 homolog OS=Homo sapiens GN=FLII PE=1 SV=2                                        | FLII_HUMAN   | 144,755.40 | 100.00% | 10  | 10  | 12  | 16.00% |
| c(+)-Tiva1 | Periplakin OS=Homo sapiens GN=PPL PE=1 SV=4                                                           | PEPL_HUMAN   | 204,747.20 | 100.00% | 14  | 14  | 15  | 11.40% |
| c(+)-Tiva1 | Tubulin beta chain OS=Homo sapiens GN=TUBB PE=1 SV=2                                                  | TBB5_HUMAN   | 49,670.60  | 100.00% | 3   | 3   | 3   | 10.10% |
| c(+)-Tiva1 | Putative pre-mRNA-splicing factor ATP-dependent RNA helicase DHX15 OS=Homo sapiens GN=DXH15 PE=1 SV=2 | DXH15_HUMAN  | 90,935.20  | 95.50%  | 1   | 1   | 1   | 1.76%  |
| c(+)-Tiva1 | Citrate synthase, mitochondrial OS=Homo sapiens GN=CS PE=1 SV=2                                       | CISY_HUMAN   | 51,713.80  | 97.80%  | 1   | 1   | 1   | 8.37%  |
| c(+)-Tiva1 | Nucleolar RNA helicase 2 OS=Homo sapiens GN=DDX21 PE=1 SV=5                                           | DDX21_HUMAN  | 87,346.00  | 60.90%  | 1   | 1   | 1   | 2.81%  |
| c(+)-Tiva1 | Cytoplasmic dynein 1 heavy chain 1 OS=Homo sapiens GN=DYNC1H1 PE=1 SV=5                               | DYHC1_HUMAN  | 532,405.60 | 100.00% | 2   | 2   | 2   | 0.93%  |
| c(+)-Tiva1 | Ras GTPase-activating protein-binding protein 1 OS=Homo sapiens GN=G3BP1 PE=1 SV=1                    | G3BP1_HUMAN  | 52,162.80  | 100.00% | 2   | 2   | 2   | 5.79%  |
| c(+)-Tiva1 | Unconventional myosin-Ie OS=Homo sapiens GN=MYO1E PE=1 SV=2                                           | MYO1E_HUMAN  | 127,066.30 | 100.00% | 3   | 3   | 3   | 4.42%  |
| c(+)-Tiva1 | ATP synthase subunit alpha, mitochondrial OS=Homo sapiens GN=ATP5A1 PE=1 SV=1                         | ATPA_HUMAN   | 59,752.10  | 100.00% | 4   | 4   | 4   | 13.70% |
| c(+)-Tiva1 | Ras GTPase-activating-like protein IQGAP1 OS=Homo sapiens GN=IQGAP1 PE=1 SV=1                         | IQGAI_HUMAN  | 189,258.60 | 100.00% | 23  | 24  | 24  | 23.40% |
| c(+)-Tiva1 | 14-3-3 protein beta/alpha OS=Homo sapiens GN=YWHAB PE=1 SV=3                                          | 1433B_HUMAN  | 28,083.10  | 100.00% | 2   | 2   | 2   | 8.94%  |
| c(+)-Tiva1 | Myosin-9 OS=Homo sapiens GN=MYH9 PE=1 SV=4                                                            | MYH9_HUMAN   | 226,537.50 | 100.00% | 155 | 259 | 365 | 62.10% |
| c(+)-Tiva1 | Band 4.1-like protein 1 OS=Homo sapiens GN=EPB41L1 PE=1 SV=2                                          | E41L1_HUMAN  | 98,505.30  | 98.00%  | 1   | 1   | 1   | 2.61%  |
| c(+)-Tiva1 | Actin-related protein 2/3 complex subunit 4 OS=Homo sapiens GN=ARPC4 PE=1 SV=3                        | ARPC4_HUMAN  | 19,667.40  | 100.00% | 1   | 1   | 1   | 11.30% |
| c(+)-Tiva1 | 40S ribosomal protein SA OS=Homo sapiens GN=RPSA PE=1 SV=4                                            | RSA_HUMAN    | 32,854.10  | 100.00% | 4   | 4   | 4   | 24.40% |
| c(+)-Tiva1 | THO complex subunit 4 OS=Homo sapiens GN=ALYREF PE=1 SV=3                                             | THOCA_HUMAN  | 26,888.70  | 95.50%  | 1   | 1   | 1   | 7.00%  |
| c(+)-Tiva1 | Eukaryotic translation initiation factor 4 gamma 1 OS=Homo sapiens GN=EIF4G1 PE=1 SV=4                | IF4G1_HUMAN  | 175,494.20 | 100.00% | 4   | 4   | 4   | 5.07%  |
| c(+)-Tiva1 | Long-chain-fatty-acyl-CoA ligase 3 OS=Homo sapiens GN=ACSL3 PE=1 SV=3                                 | ACSL3_HUMAN  | 80,423.10  | 99.80%  | 1   | 1   | 1   | 2.36%  |
| c(+)-Tiva1 | Protein disulfide-isomerase A4 OS=Homo sapiens GN=PDI A4 PE=1 SV=2                                    | PDI A4_HUMAN | 72,934.00  | 100.00% | 7   | 7   | 7   | 17.50% |
| c(+)-Tiva1 | Heterogeneous nuclear ribonucleoprotein Q OS=Homo sapiens GN=SYNCRIP PE=1 SV=2                        | HNRPQ_HUMAN  | 69,603.50  | 100.00% | 2   | 2   | 2   | 6.10%  |
| c(+)-Tiva1 | Exportin-2 OS=Homo sapiens GN=CSE1L PE=1 SV=3                                                         | XPO2_HUMAN   | 110,421.90 | 100.00% | 2   | 2   | 2   | 3.40%  |
| c(+)-Tiva1 | Clathrin heavy chain 1 OS=Homo sapiens GN=CLTC PE=1 SV=5                                              | CLH1_HUMAN   | 191,618.90 | 100.00% | 40  | 44  | 44  | 39.20% |
| c(+)-Tiva1 | Polypyrimidine tract-binding protein 1 OS=Homo sapiens GN=PTBP1 PE=1 SV=1                             | PTBP1_HUMAN  | 57,222.50  | 100.00% | 3   | 3   | 3   | 8.85%  |
| c(+)-Tiva1 | Keratin, type I cytoskeletal 10 OS=Homo sapiens GN=KRT10 PE=1 SV=6                                    | K1C10_HUMAN  | 58,828.80  | 100.00% | 8   | 9   | 9   | 23.60% |
| c(+)-Tiva1 | U5 small nuclear ribonucleoprotein 200 kDa helicase OS=Homo sapiens GN=SNRNP200 PE=1 SV=2             | U520_HUMAN   | 244,513.80 | 100.00% | 3   | 3   | 3   | 2.34%  |
| c(+)-Tiva1 | DNA-(apurinic or apyrimidinic site) lyase OS=Homo sapiens GN=APX1 PE=1 SV=2                           | APEX1_HUMAN  | 35,555.70  | 32.40%  | 0   | 0   | 0   | 0.00%  |
| c(+)-Tiva1 | Coatomer subunit beta' OS=Homo sapiens GN=COPB2 PE=1 SV=2                                             | COPB2_HUMAN  | 102,489.10 | 100.00% | 4   | 4   | 5   | 7.84%  |
| c(+)-Tiva1 | Guanine nucleotide-binding protein (Gk) subunit alpha OS=Homo sapiens GN=GNAI3 PE=1 SV=3              | GNAI3_HUMAN  | 40,533.50  | 100.00% | 2   | 2   | 2   | 10.70% |
| c(+)-Tiva1 | Heat shock protein 75 kDa, mitochondrial OS=Homo sapiens GN=TRAP1 PE=1 SV=3                           | TRAP1_HUMAN  | 80,112.90  | 95.50%  | 1   | 1   | 1   | 4.83%  |
| c(+)-Tiva1 | Guanine nucleotide-binding protein (Gi) subunit alpha-2 OS=Homo sapiens GN=GNAI2 PE=1 SV=3            | GNAI2_HUMAN  | 40,452.00  | 100.00% | 2   | 2   | 2   | 11.00% |
| c(+)-Tiva1 | 60S ribosomal protein L23 OS=Homo sapiens GN=RPL23 PE=1 SV=1                                          | RL23_HUMAN   | 14,865.90  | 95.50%  | 1   | 1   | 1   | 14.30% |
| c(+)-Tiva1 | Bromodomain and WD repeat-containing protein 1 OS=Homo sapiens GN=BRWD1 PE=1 SV=4                     | BRWD1_HUMAN  | 262,940.10 | 53.60%  | 1   | 1   | 1   | 0.78%  |
| c(+)-Tiva1 | Glucosidase 2 subunit beta OS=Homo sapiens GN=PRKCSH PE=1 SV=2                                        | GLU2B_HUMAN  | 59,425.80  | 100.00% | 3   | 3   | 3   | 12.70% |
| c(+)-Tiva1 | Putative heat shock protein HSP 90-beta-3 OS=Homo sapiens GN=HSP90AB3P PE=5 SV=1                      | H90B3_HUMAN  | 68,326.50  | 100.00% | 3   | 3   | 3   | 6.37%  |
| c(+)-Tiva1 | Sec1 family domain-containing protein 1 OS=Homo sapiens GN=SCFD1 PE=1 SV=4                            | SCFD1_HUMAN  | 72,382.30  | 100.00% | 2   | 2   | 2   | 7.32%  |
| c(+)-Tiva1 | Beta-actin-like protein 2 OS=Homo sapiens GN=ACTBL2 PE=1 SV=2                                         | ACTBL_HUMAN  | 42,004.20  | 100.00% | 3   | 5   | 6   | 13.30% |
| c(+)-Tiva1 | Putative heat shock protein HSP 90-beta 2 OS=Homo sapiens GN=HSP90AB2P PE=1 SV=2                      | H90B2_HUMAN  | 44,350.20  | 100.00% | 5   | 5   | 5   | 9.45%  |
| c(+)-Tiva1 | Tubulin beta-2A chain OS=Homo sapiens GN=TUBB2A PE=1 SV=1                                             | TBB2A_HUMAN  | 49,907.10  | 100.00% | 7   | 8   | 8   | 29.20% |
| c(+)-Tiva1 | Pleckstrin homology domain-containing family G member 3 OS=Homo sapiens GN=PLEKHG3 PE=1 SV=1          | PKHG3_HUMAN  | 134,413.00 | 84.90%  | 1   | 1   | 1   | 1.31%  |
| c(+)-Tiva1 | Microtubule-actin cross-linking factor 1, isoforms 1/2/3/5 OS=Homo sapiens GN=MACF1 PE=1 SV=4         | MACF1_HUMAN  | 838,314.20 | 72.40%  | 1   | 1   | 1   | 0.11%  |
| c(+)-Tiva1 | Nucleophosmin OS=Homo sapiens GN=NPM1 PE=1 SV=2                                                       | NPM_HUMAN    | 32,575.50  | 100.00% | 6   | 8   | 8   | 31.00% |
| c(+)-Tiva1 | Heterogeneous nuclear ribonucleoprotein U-like protein 1 OS=Homo sapiens GN=HNRNPUL1 PE=1 SV=2        | HNRL1_HUMAN  | 95,739.70  | 100.00% | 2   | 2   | 2   | 3.39%  |
| c(+)-Tiva1 | 6-phosphofructokinase, liver type OS=Homo sapiens GN=PFKL PE=1 SV=6                                   | K6PL_HUMAN   | 85,019.20  | 95.50%  | 1   | 1   | 1   | 3.85%  |
| c(+)-Tiva1 | Splicing factor 3A subunit 1 OS=Homo sapiens GN=SF3A1 PE=1 SV=1                                       | SF3A1_HUMAN  | 88,886.10  | 100.00% | 3   | 3   | 3   | 9.08%  |
| c(+)-Tiva1 | DNA-binding protein A OS=Homo sapiens GN=CSDA PE=1 SV=4                                               | DBPA_HUMAN   | 40,089.40  | 95.50%  | 1   | 1   | 1   | 4.03%  |
| c(+)-Tiva1 | Electron transfer flavoprotein subunit alpha, mitochondrial OS=Homo sapiens GN=ETFA PE=1 SV=1         | ETFA_HUMAN   | 35,080.10  | 100.00% | 2   | 2   | 2   | 11.10% |
| c(+)-Tiva1 | Solute carrier family 2, facilitated glucose transporter member 1 OS=Homo sapiens GN=SLC2A1 PE=1 SV=5 | GTR1_HUMAN   | 54,085.30  | 100.00% | 2   | 2   | 2   | 5.08%  |
| c(+)-Tiva1 | Leucine-tRNA ligase, cytoplasmic OS=Homo sapiens GN=LARS PE=1 SV=2                                    | SVLC_HUMAN   | 134,470.80 | 100.00% | 4   | 4   | 4   | 6.55%  |
| c(+)-Tiva1 | ATP synthase subunit beta, mitochondrial OS=Homo sapiens GN=ATP5B PE=1 SV=3                           | ATPB_HUMAN   | 56,560.60  | 99.90%  | 1   | 1   | 1   | 5.10%  |
| c(+)-Tiva1 | SH3 domain-binding glutamic acid-rich-like protein 2 OS=Homo sapiens GN=SH3BGR L2 PE=1 SV=2           | SH3L2_HUMAN  | 12,326.30  | 91.80%  | 1   | 1   | 1   | 13.10% |
| c(+)-Tiva1 | 40S ribosomal protein S7 OS=Homo sapiens GN=RPS7 PE=1 SV=1                                            | RS7_HUMAN    | 22,127.50  | 95.50%  | 1   | 1   | 1   | 15.50% |
| c(+)-Tiva1 | Clathrin interactor 1 OS=Homo sapiens GN=CLINT1 PE=1 SV=1                                             | EPN4_HUMAN   | 68,260.50  | 95.50%  | 1   | 1   | 1   | 2.24%  |
| c(+)-Tiva1 | Ubiquitin carboxyl-terminal hydrolase 7 OS=Homo sapiens GN=USP7 PE=1 SV=2                             | UBP7_HUMAN   | 128,305.00 | 85.60%  | 1   | 1   | 1   | 2.00%  |
| c(+)-Tiva1 | Histone deacetylase 6 OS=Homo sapiens GN=HDAC6 PE=1 SV=2                                              | HDAC6_HUMAN  | 131,417.70 | 100.00% | 2   | 2   | 2   | 3.79%  |
| c(+)-Tiva1 | Surfeit locus protein 4 OS=Homo sapiens GN=SURF4 PE=1 SV=3                                            | 4SURF4_HUMAN | 30,395.40  | 69.10%  | 1   | 1   | 1   | 4.83%  |
| c(+)-Tiva1 | Coatomer subunit epsilon OS=Homo sapiens GN=COPE PE=1 SV=3                                            | COPE_HUMAN   | 34,482.90  | 100.00% | 2   | 2   | 2   | 10.10% |
| c(+)-Tiva1 | Pro-cathepsin H OS=Homo sapiens GN=CTSH PE=1 SV=4                                                     | CATH_HUMAN   | 37,393.90  | 95.50%  | 1   | 1   | 1   | 11.00% |
| c(+)-Tiva1 | Heat shock protein HSP 90-alpha OS=Homo sapiens GN=HSP90AA1 PE=1 SV=5                                 | HS90A_HUMAN  | 84,663.20  | 100.00% | 8   | 8   | 8   | 19.70% |
| c(+)-Tiva1 | Neutral alpha-glucosidase AB OS=Homo sapiens GN=GANAB PE=1 SV=3                                       | GANAB_HUMAN  | 106,875.90 | 100.00% | 23  | 28  | 28  | 35.60% |
| c(+)-Tiva1 | Pericentriolar material 1 protein OS=Homo sapiens GN=PCM1 PE=1 SV=4                                   | PCM1_HUMAN   | 228,531.50 | 43.60%  | 0   | 0   | 0   | 0.00%  |
| c(+)-Tiva1 | Phosphoglycerate kinase 1 OS=Homo sapiens GN=PGK1 PE=1 SV=3                                           | PGK1_HUMAN   | 44,615.30  | 100.00% | 3   | 3   | 3   | 11.50% |
| c(+)-Tiva1 | Adenosylhomocysteinase OS=Homo sapiens GN=AHCY PE=1 SV=4                                              | SAHH_HUMAN   | 47,717.10  | 100.00% | 5   | 5   | 5   | 15.70% |

|            |                                                                               |                 |             |      |      |             |            |         |     |     |     |        |
|------------|-------------------------------------------------------------------------------|-----------------|-------------|------|------|-------------|------------|---------|-----|-----|-----|--------|
| c(+)-Tiva1 | General transcription factor II-I                                             | OS=Homo sapiens | GN=GTf2I    | PE=1 | SV=2 | GTf2I_HUMAN | 112,417.90 | 100.00% | 3   | 3   | 3   | 6.41%  |
| c(+)-Tiva1 | Fascin                                                                        | OS=Homo sapiens | GN=FSCN1    | PE=1 | SV=3 | FSCN1_HUMAN | 54,530.30  | 100.00% | 3   | 3   | 3   | 11.20% |
| c(+)-Tiva1 | Activator of 90 kDa heat shock protein ATPase homolog 1                       | OS=Homo sapiens | GN=AHSA1    | PE=1 | SV=1 | AHSA1_HUMAN | 38,274.40  | 95.50%  | 1   | 1   | 1   | 6.51%  |
| c(+)-Tiva1 | Serine/threonine-protein phosphatase PGAM5, mitochondrial                     | OS=Homo sapiens | GN=PGAM5    | PE=1 | SV=2 | PGAM5_HUMAN | 32,005.20  | 87.80%  | 1   | 1   | 1   | 6.92%  |
| c(+)-Tiva1 | Aspartyl/asparaginyl beta-hydroxylase                                         | OS=Homo sapiens | GN=ASPH     | PE=1 | SV=3 | ASPH_HUMAN  | 85,862.60  | 100.00% | 5   | 5   | 6   | 11.50% |
| c(+)-Tiva1 | Splicing factor 3B subunit 1                                                  | OS=Homo sapiens | GN=SF3B1    | PE=1 | SV=3 | SF3B1_HUMAN | 145,835.30 | 93.40%  | 0   | 0   | 0   | 0.00%  |
| c(+)-Tiva1 | Mitochondrial-processing peptidase subunit beta                               | OS=Homo sapiens | GN=PMPCB    | PE=1 | SV=2 | MPPB_HUMAN  | 54,367.10  | 93.00%  | 1   | 1   | 1   | 4.70%  |
| c(+)-Tiva1 | Very-long-chain (3R)-3-hydroxyacyl-[acyl-carrier protein] dehydratase 3       | OS=Homo sapiens | GN=PTPLAD1  | PE=1 | SV=2 | HACD3_HUMAN | 43,161.10  | 75.30%  | 1   | 1   | 1   | 5.80%  |
| c(+)-Tiva1 | Calreticulin                                                                  | OS=Homo sapiens | GN=CALR     | PE=1 | SV=1 | CALR_HUMAN  | 48,142.90  | 100.00% | 12  | 14  | 14  | 46.50% |
| c(+)-Tiva1 | Aldehyde dehydrogenase, dimeric NADP-prefering                                | OS=Homo sapiens | GN=ALDH3A1  | PE=1 | SV=3 | AL3A1_HUMAN | 50,395.70  | 100.00% | 10  | 10  | 11  | 28.50% |
| c(+)-Tiva1 | AP-2 complex subunit beta                                                     | OS=Homo sapiens | GN=AP2B1    | PE=1 | SV=1 | AP2B1_HUMAN | 104,555.30 | 93.60%  | 1   | 1   | 1   | 1.17%  |
| c(+)-Tiva1 | Actin-related protein 2/3 complex subunit 5-like protein                      | OS=Homo sapiens | GN=ARPC5L   | PE=1 | SV=1 | ARPSL_HUMAN | 16,941.30  | 90.90%  | 1   | 1   | 1   | 24.80% |
| c(+)-Tiva1 | sp[Q13813] SPTA2_HUMAN Spectrin alpha chain, brain                            | OS=Homo sapiens | GN=SPTAN1   | PE=1 | SV=1 | SPTA2_HUMAN | 0          | 100.00% | 156 | 191 | 202 | 0.00%  |
| c(+)-Tiva1 | Heat shock-related 70 kDa protein 2                                           | OS=Homo sapiens | GN=HSPA2    | PE=1 | SV=1 | HSP72_HUMAN | 70,023.00  | 100.00% | 3   | 3   | 3   | 7.04%  |
| c(+)-Tiva1 | Alpha-actinin-4                                                               | OS=Homo sapiens | GN=ACTN4    | PE=1 | SV=2 | ACTN4_HUMAN | 104,857.20 | 100.00% | 23  | 25  | 25  | 37.20% |
| c(+)-Tiva1 | Prostaglandin H synthase 2                                                    | OS=Homo sapiens | GN=PTGES2   | PE=1 | SV=1 | PGES2_HUMAN | 41,943.60  | 100.00% | 2   | 2   | 2   | 13.30% |
| c(+)-Tiva1 | ATP-dependent RNA helicase DDX1                                               | OS=Homo sapiens | GN=DDX1     | PE=1 | SV=2 | DDX1_HUMAN  | 82,433.20  | 79.90%  | 1   | 1   | 1   | 2.16%  |
| c(+)-Tiva1 | 40S ribosomal protein S4, X isoform                                           | OS=Homo sapiens | GN=RP54X    | PE=1 | SV=2 | RS4X_HUMAN  | 29,599.30  | 100.00% | 1   | 1   | 1   | 6.46%  |
| c(+)-Tiva1 | Insulin-like growth factor 2 mRNA-binding protein 2                           | OS=Homo sapiens | GN=IGF2BP2  | PE=1 | SV=2 | IF2B2_HUMAN | 66,122.40  | 23.20%  | 0   | 0   | 0   | 0.00%  |
| c(+)-Tiva1 | 40S ribosomal protein S18                                                     | OS=Homo sapiens | GN=RP518    | PE=1 | SV=3 | RS18_HUMAN  | 17,719.30  | 100.00% | 1   | 1   | 1   | 7.89%  |
| c(+)-Tiva1 | Ras-related protein Rab-10                                                    | OS=Homo sapiens | GN=RAB10    | PE=1 | SV=1 | RAB10_HUMAN | 22,542.10  | 98.10%  | 1   | 1   | 1   | 6.00%  |
| c(+)-Tiva1 | Putative beta-actin-like protein 3                                            | OS=Homo sapiens | GN=POTEKP   | PE=5 | SV=1 | ACTBM_HUMAN | 42,017.20  | 100.00% | 3   | 5   | 5   | 11.20% |
| c(+)-Tiva1 | ATP-dependent RNA helicase DDX39A                                             | OS=Homo sapiens | GN=DDX39A   | PE=1 | SV=2 | DX39A_HUMAN | 49,129.80  | 100.00% | 2   | 2   | 2   | 10.30% |
| c(+)-Tiva1 | 116 kDa US small nuclear ribonucleoprotein component                          | OS=Homo sapiens | GN=EFTUD2   | PE=1 | SV=1 | USS1_HUMAN  | 109,438.10 | 100.00% | 2   | 2   | 2   | 3.29%  |
| c(+)-Tiva1 | Coronin-2A                                                                    | OS=Homo sapiens | GN=CORO2A   | PE=2 | SV=2 | COR2A_HUMAN | 59,764.70  | 100.00% | 6   | 6   | 6   | 20.20% |
| c(+)-Tiva1 | Dihydrolipoyl dehydrogenase, mitochondrial                                    | OS=Homo sapiens | GN=DLD      | PE=1 | SV=2 | DLDH_HUMAN  | 54,177.50  | 93.30%  | 1   | 1   | 1   | 6.48%  |
| c(+)-Tiva1 | Transportin-1                                                                 | OS=Homo sapiens | GN=TNPO1    | PE=1 | SV=2 | TNPO1_HUMAN | 102,358.80 | 100.00% | 2   | 2   | 2   | 4.34%  |
| c(+)-Tiva1 | Transcription intermediary factor 1-beta                                      | OS=Homo sapiens | GN=TRIM28   | PE=1 | SV=5 | TIF1B_HUMAN | 88,549.00  | 100.00% | 6   | 6   | 6   | 14.60% |
| c(+)-Tiva1 | Coproporphyrinogen-III oxidase, mitochondrial                                 | OS=Homo sapiens | GN=CPOX     | PE=1 | SV=3 | HEM6_HUMAN  | 50,152.00  | 92.30%  | 1   | 1   | 1   | 3.74%  |
| c(+)-Tiva1 | Glycine-tRNA ligase                                                           | OS=Homo sapiens | GN=GARS     | PE=1 | SV=3 | SYG_HUMAN   | 83,167.60  | 100.00% | 2   | 2   | 2   | 5.28%  |
| c(+)-Tiva1 | Eukaryotic translation initiation factor 2 subunit 1                          | OS=Homo sapiens | GN=EIF2S1   | PE=1 | SV=3 | IF2A_HUMAN  | 36,112.70  | 95.50%  | 1   | 1   | 1   | 3.81%  |
| c(+)-Tiva1 | Ribonuclease inhibitor                                                        | OS=Homo sapiens | GN=RNH1     | PE=1 | SV=2 | RINI_HUMAN  | 49,974.40  | 98.80%  | 1   | 1   | 1   | 6.07%  |
| c(+)-Tiva1 | Thioredoxin reductase 1, cytoplasmic                                          | OS=Homo sapiens | GN=TXNRD1   | PE=1 | SV=3 | TRXR1_HUMAN | 70,906.90  | 100.00% | 3   | 3   | 3   | 8.01%  |
| c(+)-Tiva1 | T-complex protein 1 subunit theta                                             | OS=Homo sapiens | GN=CCT8     | PE=1 | SV=4 | TCPO_HUMAN  | 59,621.00  | 100.00% | 2   | 2   | 2   | 4.56%  |
| c(+)-Tiva1 | 26S protease regulatory subunit 10B                                           | OS=Homo sapiens | GN=PSMC6    | PE=1 | SV=1 | PRS10_HUMAN | 44,174.90  | 97.40%  | 1   | 1   | 1   | 7.71%  |
| c(+)-Tiva1 | 40S ribosomal protein S8                                                      | OS=Homo sapiens | GN=RP58     | PE=1 | SV=2 | RS8_HUMAN   | 24,206.40  | 96.40%  | 1   | 1   | 1   | 6.25%  |
| c(+)-Tiva1 | Twintillin-1                                                                  | OS=Homo sapiens | GN=TWIF1    | PE=1 | SV=3 | TWIF1_HUMAN | 40,284.20  | 100.00% | 3   | 3   | 3   | 15.40% |
| c(+)-Tiva1 | T-complex protein 1 subunit delta                                             | OS=Homo sapiens | GN=CCT4     | PE=1 | SV=4 | CPD_HUMAN   | 57,926.00  | 100.00% | 3   | 3   | 3   | 9.46%  |
| c(+)-Tiva1 | Mitotic checkpoint protein BUB3                                               | OS=Homo sapiens | GN=BUB3     | PE=1 | SV=1 | BUB3_HUMAN  | 37,154.70  | 100.00% | 2   | 2   | 2   | 10.10% |
| c(+)-Tiva1 | Heat shock protein HSP 90-beta                                                | OS=Homo sapiens | GN=HSP90AB1 | PE=1 | SV=4 | HS90B_HUMAN | 83,267.30  | 100.00% | 6   | 6   | 6   | 13.10% |
| c(+)-Tiva1 | Interleukin enhancer-binding factor 3                                         | OS=Homo sapiens | GN=ILF3     | PE=1 | SV=3 | ILF3_HUMAN  | 95,338.90  | 100.00% | 5   | 5   | 5   | 10.70% |
| c(+)-Tiva1 | Peroxiredoxin-1                                                               | OS=Homo sapiens | GN=PRDX1    | PE=1 | SV=1 | PRDX1_HUMAN | 22,110.90  | 100.00% | 7   | 10  | 10  | 44.20% |
| c(+)-Tiva1 | Heterogeneous nuclear ribonucleoprotein F                                     | OS=Homo sapiens | GN=HNRNPF   | PE=1 | SV=3 | HNRPF_HUMAN | 45,671.90  | 100.00% | 2   | 2   | 2   | 7.95%  |
| c(+)-Tiva1 | Splicing factor 3B subunit 3                                                  | OS=Homo sapiens | GN=SF3B3    | PE=1 | SV=4 | SF3B3_HUMAN | 135,579.40 | 100.00% | 3   | 3   | 3   | 4.85%  |
| c(+)-Tiva1 | Catenin alpha-1                                                               | OS=Homo sapiens | GN=CTNNA1   | PE=1 | SV=1 | CTNA1_HUMAN | 100,072.90 | 100.00% | 4   | 4   | 4   | 8.17%  |
| c(+)-Tiva1 | Heterogeneous nuclear ribonucleoprotein H                                     | OS=Homo sapiens | GN=HNRNPH1  | PE=1 | SV=4 | HNRH1_HUMAN | 49,229.80  | 100.00% | 5   | 5   | 6   | 17.60% |
| c(+)-Tiva1 | Protein phosphatase 1 regulatory subunit 12A                                  | OS=Homo sapiens | GN=PPP1R12A | PE=1 | SV=1 | MYPT1_HUMAN | 115,283.40 | 100.00% | 2   | 2   | 2   | 3.50%  |
| c(+)-Tiva1 | Hypoxia up-regulated protein 1                                                | OS=Homo sapiens | GN=HYOU1    | PE=1 | SV=1 | HYOU1_HUMAN | 111,336.80 | 100.00% | 9   | 10  | 10  | 16.30% |
| c(+)-Tiva1 | Thioredoxin                                                                   | OS=Homo sapiens | GN=TXN      | PE=1 | SV=3 | THIO_HUMAN  | 11,737.30  | 82.30%  | 1   | 1   | 1   | 26.70% |
| c(+)-Tiva1 | Unconventional myosin-XVIIIA                                                  | OS=Homo sapiens | GN=MYO18A   | PE=1 | SV=3 | MY18A_HUMAN | 233,119.80 | 100.00% | 24  | 24  | 24  | 21.10% |
| c(+)-Tiva1 | Signal recognition particle receptor subunit alpha                            | OS=Homo sapiens | GN=SRPR     | PE=1 | SV=2 | SRPR_HUMAN  | 69,812.80  | 28.20%  | 0   | 0   | 0   | 0.00%  |
| c(+)-Tiva1 | 26S proteasome non-ATPase regulatory subunit 1                                | OS=Homo sapiens | GN=PSMD1    | PE=1 | SV=2 | PSMD1_HUMAN | 105,839.20 | 100.00% | 3   | 3   | 3   | 5.67%  |
| c(+)-Tiva1 | 40S ribosomal protein S19                                                     | OS=Homo sapiens | GN=RP519    | PE=1 | SV=2 | RS19_HUMAN  | 16,060.50  | 97.70%  | 1   | 1   | 1   | 10.30% |
| c(+)-Tiva1 | Integrin beta-4                                                               | OS=Homo sapiens | GN=ITGB4    | PE=1 | SV=5 | ITB4_HUMAN  | 202,166.70 | 99.60%  | 1   | 1   | 1   | 0.99%  |
| c(+)-Tiva1 | Keratin, type I cytoskeletal 13                                               | OS=Homo sapiens | GN=KRT13    | PE=1 | SV=4 | K1C13_HUMAN | 49,589.30  | 100.00% | 3   | 4   | 4   | 9.61%  |
| c(+)-Tiva1 | Elongation factor Tu, mitochondrial                                           | OS=Homo sapiens | GN=EFU      | PE=1 | SV=2 | EFTU_HUMAN  | 49,542.40  | 95.50%  | 1   | 2   | 2   | 7.52%  |
| c(+)-Tiva1 | Adseverin                                                                     | OS=Homo sapiens | GN=SCIN     | PE=1 | SV=4 | ADSV_HUMAN  | 80,490.20  | 100.00% | 2   | 2   | 2   | 5.17%  |
| c(+)-Tiva1 | WD repeat-containing protein 1                                                | OS=Homo sapiens | GN=WDR1     | PE=1 | SV=4 | WDR1_HUMAN  | 66,193.20  | 100.00% | 2   | 2   | 2   | 6.60%  |
| c(+)-Tiva1 | Lupus La protein                                                              | OS=Homo sapiens | GN=SSB      | PE=1 | SV=2 | LA_HUMAN    | 46,839.00  | 99.90%  | 1   | 1   | 1   | 3.92%  |
| c(+)-Tiva1 | ATP-citrate synthase                                                          | OS=Homo sapiens | GN=ACLY     | PE=1 | SV=3 | ACLY_HUMAN  | 120,842.80 | 23.20%  | 0   | 0   | 0   | 0.00%  |
| c(+)-Tiva1 | 60S ribosomal protein L9                                                      | OS=Homo sapiens | GN=RLP9     | PE=1 | SV=1 | RL9_HUMAN   | 21,863.70  | 95.50%  | 1   | 1   | 1   | 9.90%  |
| c(+)-Tiva1 | Protein SEC13 homolog                                                         | OS=Homo sapiens | GN=SEC13    | PE=1 | SV=3 | SEC13_HUMAN | 35,539.60  | 92.30%  | 1   | 1   | 1   | 7.14%  |
| c(+)-Tiva1 | UDP-glucose 6-dehydrogenase                                                   | OS=Homo sapiens | GN=UGDH     | PE=1 | SV=1 | UGDH_HUMAN  | 55,025.30  | 100.00% | 6   | 6   | 6   | 18.40% |
| c(+)-Tiva1 | Reticulocalbin-2                                                              | OS=Homo sapiens | GN=RCN2     | PE=1 | SV=1 | RCN2_HUMAN  | 36,877.60  | 95.50%  | 1   | 1   | 1   | 7.26%  |
| c(+)-Tiva1 | Proteasome subunit alpha type-6                                               | OS=Homo sapiens | GN=PSMA6    | PE=1 | SV=1 | PSA6_HUMAN  | 27,399.50  | 100.00% | 2   | 2   | 2   | 9.76%  |
| c(+)-Tiva1 | General transcription factor 3C polypeptide 5                                 | OS=Homo sapiens | GN=GTf3C5   | PE=1 | SV=2 | TF3C5_HUMAN | 59,572.60  | 83.10%  | 1   | 1   | 1   | 4.82%  |
| c(+)-Tiva1 | OTU domain-containing protein 5                                               | OS=Homo sapiens | GN=OTUD5    | PE=1 | SV=1 | OTUD5_HUMAN | 60,624.80  | 51.60%  | 1   | 1   | 1   | 1.40%  |
| c(+)-Tiva1 | Spliceosome RNA helicase DDX39B                                               | OS=Homo sapiens | GN=DDX39B   | PE=1 | SV=1 | DX39B_HUMAN | 48,992.00  | 100.00% | 3   | 3   | 3   | 13.60% |
| c(+)-Tiva1 | Annexin A2                                                                    | OS=Homo sapiens | GN=ANXA2    | PE=1 | SV=2 | ANXA2_HUMAN | 38,606.10  | 100.00% | 13  | 14  | 14  | 44.20% |
| c(+)-Tiva1 | Gamma-adducin                                                                 | OS=Homo sapiens | GN=ADD3     | PE=1 | SV=1 | ADDG_HUMAN  | 79,156.00  | 95.50%  | 1   | 1   | 1   | 2.27%  |
| c(+)-Tiva1 | Annexin A1                                                                    | OS=Homo sapiens | GN=ANXA1    | PE=1 | SV=2 | ANXA1_HUMAN | 38,715.90  | 79.00%  | 1   | 1   | 1   | 3.18%  |
| c(+)-Tiva1 | Nuclease-sensitive element-binding protein 1                                  | OS=Homo sapiens | GN=YBX1     | PE=1 | SV=3 | YBOX1_HUMAN | 35,923.80  | 95.50%  | 1   | 1   | 1   | 9.26%  |
| c(+)-Tiva1 | Ubiquitin-like modifier-activating enzyme 1                                   | OS=Homo sapiens | GN=UBA1     | PE=1 | SV=3 | UBA1_HUMAN  | 117,850.30 | 100.00% | 3   | 3   | 3   | 4.73%  |
| c(+)-Tiva1 | Plectin                                                                       | OS=Homo sapiens | GN=PLEC     | PE=1 | SV=3 | PLEC_HUMAN  | 531,783.90 | 100.00% | 145 | 163 | 165 | 39.60% |
| c(+)-Tiva1 | ATP-dependent RNA helicase A                                                  | OS=Homo sapiens | GN=DHX9     | PE=1 | SV=4 | DHX9_HUMAN  | 140,961.50 | 100.00% | 6   | 6   | 6   | 7.01%  |
| c(+)-Tiva1 | Keratin, type II cytoskeletal 2 epidermal                                     | OS=Homo sapiens | GN=KRT2     | PE=1 | SV=2 | K22E_HUMAN  | 65,433.90  | 100.00% | 5   | 5   | 5   | 9.39%  |
| c(+)-Tiva1 | Twintillin-2                                                                  | OS=Homo sapiens | GN=TWIF2    | PE=1 | SV=2 | TWIF2_HUMAN | 39,548.90  | 95.50%  | 1   | 1   | 1   | 4.87%  |
| c(+)-Tiva1 | Pre-mRNA-processing factor 19                                                 | OS=Homo sapiens | GN=PRPF19   | PE=1 | SV=1 | PRP19_HUMAN | 55,181.30  | 100.00% | 3   | 3   | 3   | 19.00% |
| c(+)-Tiva1 | Thioredoxin-dependent peroxide reductase, mitochondrial                       | OS=Homo sapiens | GN=PRDX3    | PE=1 | SV=3 | PRDX3_HUMAN | 27,692.70  | 94.70%  | 1   | 1   | 1   | 5.47%  |
| c(+)-Tiva1 | Phosphoenolpyruvate carboxykinase [GTP], mitochondrial                        | OS=Homo sapiens | GN=PCK2     | PE=1 | SV=3 | PCCKM_HUMAN | 70,730.90  | 100.00% | 4   | 4   | 4   | 11.10% |
| c(+)-Tiva1 | Golgi apparatus protein 1                                                     | OS=Homo sapiens | GN=GLG1     | PE=1 | SV=3 | GLG1_HUMAN  | 134,553.90 | 34.50%  | 0   | 0   | 0   | 0.00%  |
| c(+)-Tiva1 | Src substrate cortactin                                                       | OS=Homo sapiens | GN=CTTN     | PE=1 | SV=2 | SRC8_HUMAN  | 61,585.50  | 100.00% | 2   | 2   | 2   | 3.64%  |
| c(+)-Tiva1 | Ran GTPase-activating protein 1                                               | OS=Homo sapiens | GN=RANGAP1  | PE=1 | SV=1 | RAGP1_HUMAN | 63,543.30  | 100.00% | 3   | 3   | 3   | 10.70% |
| c(+)-Tiva1 | Dolichyl-diphosphooligosaccharide--protein glycosyltransferase 48 kDa subunit | OS=Homo sapiens | GN=DDOST    | PE=1 | SV=4 | OST48_HUMAN | 50,802.50  | 14.80%  | 0   | 0   | 0   | 0.00%  |
| c(+)-Tiva1 | Eukaryotic translation initiation factor 3 subunit A                          | OS=Homo sapiens | GN=EIF3A    | PE=1 | SV=1 | EIF3A_HUMAN | 166,574.90 | 100.00% | 3   | 4   | 4   | 3.91%  |
| c(+)-Tiva1 | Sequestosome-1                                                                | OS=Homo sapiens | GN=SQSTM1   | PE=1 | SV=1 | SQSTM_HUMAN | 47,687.40  | 92.70%  | 1   | 1   | 1   | 5.91%  |
| c(+)-Tiva1 | Isocitrate dehydrogenase [NADP], mitochondrial                                | OS=Homo sapiens | GN=IDH2     | PE=1 | SV=2 | IDHP_HUMAN  | 50,910.40  | 95.50%  | 1   | 1   | 1   | 2.88%  |
| c(+)-Tiva1 | Superoxide dismutase [Mn], mitochondrial                                      | OS=Homo sapiens | GN=SOD2     | PE=1 | SV=2 | SODM_HUMAN  | 24,722.60  | 85.80%  | 1   | 1   | 1   | 6.31%  |
| c(+)-Tiva1 | Retinal dehydrogenase 1                                                       | OS=Homo sapiens | GN=ALDH1A1  | PE=1 | SV=2 | AL1A1_HUMAN | 54,862.80  | 93.80%  | 1   | 1   | 1   | 3.39%  |
| c(+)-Tiva1 | 26S proteasome non-ATPase regulatory subunit 2                                | OS=Homo sapiens | GN=PSMD2    | PE=1 | SV=3 | PSMD2_HUMAN | 100,202.20 | 100.00% | 3   | 3   | 3   | 5.73%  |
| c(+)-Tiva1 | Aldo-keto reductase family 1 member C1                                        | OS=Homo sapiens | GN=AKR1C1   | PE=1 | SV=1 | AK1C1_HUMAN | 36,789.10  | 100.00% | 10  | 11  | 11  | 56.00% |
| c(+)-Tiva1 | Heterogeneous nuclear ribonucleoprotein U                                     | OS=Homo sapiens | GN=HNRNPU   | PE=1 | SV=6 | HNRPU_HUMAN | 90,585.20  | 100.00% | 15  | 15  | 19  | 32.20% |
| c(+)-Tiva1 | Enoyl-CoA hydratase, mitochondrial                                            | OS=Homo sapiens | GN=ECHS1    | PE=1 | SV=4 | ECHM_HUMAN  | 31,388.20  | 95.50%  | 1   | 1   | 1   | 6.21%  |
| c(+)-Tiva1 | Keratin, type I cytoskeletal 14                                               | OS=Homo sapiens | GN=KRT14    | PE=1 | SV=4 | K1C14_HUMAN | 51,562.50  | 100.00% | 2   | 2   | 2   | 4.66%  |
| c(+)-Tiva1 | Fatty acid synthase                                                           | OS=Homo sapiens | GN=FASN     | PE=1 | SV=3 | FAS_HUMAN   | 273,427.10 | 100.00% | 3   | 3   | 3   | 2.67%  |
| c(+)-Tiva1 | F-box-like/WD repeat-containing protein TBL1XR1                               | OS=Homo sapiens | GN=TBL1XR1  | PE=1 | SV=1 | TBL1R_HUMAN | 55,594.90  | 95.50%  | 1   | 1   | 1   | 5.45%  |

|            |                                                                                                                                                  |             |            |         |    |    |    |        |
|------------|--------------------------------------------------------------------------------------------------------------------------------------------------|-------------|------------|---------|----|----|----|--------|
| c(+)-Tiva1 | RNA-binding motif protein, X chromosome OS=Homo sapiens GN=RBMX PE=1 SV=3                                                                        | RBMX_HUMAN  | 42,333.70  | 15.00%  | 0  | 0  | 0  | 0.00%  |
| c(+)-Tiva1 | Procollagen-lysine, 2-oxoglutarate 5-dioxygenase 3 OS=Homo sapiens GN=PLOD3 PE=1 SV=1                                                            | PLOD3_HUMAN | 84,786.80  | 96.60%  | 1  | 1  | 1  | 2.30%  |
| c(+)-Tiva1 | Leukocyte elastase inhibitor OS=Homo sapiens GN=SERPINB1 PE=1 SV=1                                                                               | ILEU_HUMAN  | 42,743.80  | 96.70%  | 1  | 1  | 1  | 3.69%  |
| c(+)-Tiva1 | Peroxiredoxin-4 OS=Homo sapiens GN=PRDX4 PE=1 SV=1                                                                                               | PRDX4_HUMAN | 30,541.10  | 100.00% | 4  | 4  | 4  | 26.60% |
| c(+)-Tiva1 | Sister chromatid cohesion protein PD55 homolog A OS=Homo sapiens GN=PD55A PE=1 SV=1                                                              | PD55A_HUMAN | 150,835.50 | 24.30%  | 0  | 0  | 0  | 0.00%  |
| c(+)-Tiva1 | Myosin light chain 1/3, skeletal muscle isoform OS=Homo sapiens GN=MYL1 PE=1 SV=3                                                                | MYL1_HUMAN  | 21,145.60  | 95.50%  | 1  | 1  | 2  | 8.25%  |
| c(+)-Tiva1 | Eukaryotic translation initiation factor 3 subunit C OS=Homo sapiens GN=EIF3C PE=1 SV=1                                                          | EIF3C_HUMAN | 105,347.20 | 100.00% | 5  | 5  | 5  | 10.10% |
| c(+)-Tiva1 | Protein disulfide-isomerase A6 OS=Homo sapiens GN=PDIA6 PE=1 SV=1                                                                                | PDIA6_HUMAN | 48,122.30  | 100.00% | 8  | 9  | 10 | 31.40% |
| c(+)-Tiva1 | Aldehyde dehydrogenase family 1 member A3 OS=Homo sapiens GN=ALDH1A3 PE=1 SV=2                                                                   | AL1A3_HUMAN | 56,109.30  | 29.60%  | 0  | 0  | 0  | 0.00%  |
| c(+)-Tiva1 | Eukaryotic translation initiation factor 3 subunit B OS=Homo sapiens GN=EIF3B PE=1 SV=3                                                          | EIF3B_HUMAN | 92,482.80  | 100.00% | 3  | 3  | 3  | 6.76%  |
| c(+)-Tiva1 | Proteasome subunit beta type-4 OS=Homo sapiens GN=PSMB4 PE=1 SV=4                                                                                | PSB4_HUMAN  | 29,205.00  | 100.00% | 2  | 2  | 2  | 15.20% |
| c(+)-Tiva1 | N-acetylglucosaminyltransferase 7 OS=Homo sapiens GN=GALT7 PE=1 SV=1                                                                             | GALT7_HUMAN | 75,390.60  | 100.00% | 2  | 2  | 2  | 5.48%  |
| c(+)-Tiva1 | Aldo-keto reductase family 1 member C3 OS=Homo sapiens GN=AKR1C3 PE=1 SV=4                                                                       | AK1C3_HUMAN | 36,854.10  | 100.00% | 3  | 3  | 3  | 16.10% |
| c(+)-Tiva1 | Aldo-keto reductase family 1 member C2 OS=Homo sapiens GN=AKR1C2 PE=1 SV=3                                                                       | AK1C2_HUMAN | 36,735.90  | 100.00% | 2  | 2  | 2  | 11.50% |
| c(+)-Tiva1 | Keratin, type I cytoskeletal 17 OS=Homo sapiens GN=KRT17 PE=1 SV=2                                                                               | K1C17_HUMAN | 48,106.70  | 99.70%  | 1  | 1  | 1  | 2.31%  |
| c(+)-Tiva1 | Elongation factor 1-gamma OS=Homo sapiens GN=EEF1G PE=1 SV=3                                                                                     | EF1G_HUMAN  | 50,119.40  | 100.00% | 7  | 7  | 7  | 23.60% |
| c(+)-Tiva1 | Delta(3,5)-Delta(2,4)-dienoyl-CoA isomerase, mitochondrial OS=Homo sapiens GN=ECH1 PE=1 SV=2                                                     | ECH1_HUMAN  | 35,816.20  | 100.00% | 2  | 2  | 2  | 9.45%  |
| c(+)-Tiva1 | Serine/threonine-protein phosphatase PP1-alpha catalytic subunit OS=Homo sapiens GN=PPP1CA PE=1 SV=1                                             | PP1A_HUMAN  | 37,513.90  | 100.00% | 2  | 2  | 2  | 10.00% |
| c(+)-Tiva1 | Transferrin receptor protein OS=Homo sapiens GN=TFRC PE=1 SV=2                                                                                   | TRF1_HUMAN  | 84,873.60  | 100.00% | 2  | 2  | 2  | 4.61%  |
| c(+)-Tiva1 | T-complex protein 1 subunit alpha OS=Homo sapiens GN=TCP1 PE=1 SV=1                                                                              | TCPA_HUMAN  | 60,345.20  | 100.00% | 3  | 3  | 3  | 9.53%  |
| c(+)-Tiva1 | Actin-related protein 2/3 complex subunit 2 OS=Homo sapiens GN=ARPC2 PE=1 SV=1                                                                   | ARPC2_HUMAN | 34,333.70  | 100.00% | 3  | 3  | 3  | 12.30% |
| c(+)-Tiva1 | Casein kinase II subunit alpha OS=Homo sapiens GN=CSNK2A1 PE=1 SV=1                                                                              | CSK21_HUMAN | 45,144.50  | 25.30%  | 0  | 0  | 0  | 0.00%  |
| c(+)-Tiva1 | X-ray repair cross-complementing protein 6 OS=Homo sapiens GN=XRCC6 PE=1 SV=2                                                                    | XRCC6_HUMAN | 69,846.40  | 15.60%  | 0  | 0  | 0  | 0.00%  |
| c(+)-Tiva1 | RNA-binding protein FUS OS=Homo sapiens GN=FUS PE=1 SV=1                                                                                         | FUS_HUMAN   | 53,426.00  | 95.50%  | 1  | 1  | 1  | 6.08%  |
| c(+)-Tiva1 | Tumor-associated calcium signal transducer 2 OS=Homo sapiens GN=TACSTD2 PE=1 SV=3                                                                | TACD2_HUMAN | 35,709.80  | 74.70%  | 1  | 1  | 1  | 3.10%  |
| c(+)-Tiva1 | Elongation factor 1-alpha 1 OS=Homo sapiens GN=EEF1A1 PE=1 SV=1                                                                                  | EF1A1_HUMAN | 50,141.20  | 100.00% | 7  | 7  | 7  | 27.70% |
| c(+)-Tiva1 | Transketolase OS=Homo sapiens GN=TKT PE=1 SV=3                                                                                                   | TKT_HUMAN   | 67,879.40  | 100.00% | 12 | 13 | 13 | 34.70% |
| c(+)-Tiva1 | Cathepsin B OS=Homo sapiens GN=CTSB PE=1 SV=3                                                                                                    | CATB_HUMAN  | 37,821.20  | 95.50%  | 1  | 1  | 1  | 5.31%  |
| c(+)-Tiva1 | Intraflagellar transport protein 27 homolog OS=Homo sapiens GN=IFT27 PE=1 SV=1                                                                   | IFT27_HUMAN | 20,480.50  | 56.30%  | 1  | 1  | 1  | 4.30%  |
| c(+)-Tiva1 | Peptidyl-prolyl cis-trans isomerase FKBP4 OS=Homo sapiens GN=FKBP4 PE=1 SV=3                                                                     | FKBP4_HUMAN | 51,805.90  | 100.00% | 2  | 2  | 2  | 4.79%  |
| c(+)-Tiva1 | Putative endoplasmic-like protein OS=Homo sapiens GN=HSP90B2P PE=5 SV=1                                                                          | ENPLL_HUMAN | 45,859.70  | 100.00% | 2  | 3  | 3  | 4.76%  |
| c(+)-Tiva1 | Hydrolipoyllysine-residue succinyltransferase component of 2-oxoglutarate dehydrogenase complex, mitochondrial OS=Homo sapiens GN=OAO2 PE=1 SV=1 | ODO2_HUMAN  | 48,755.20  | 9.80%   | 0  | 0  | 0  | 0.00%  |
| c(+)-Tiva1 | Early endosome antigen 1 OS=Homo sapiens GN=EEA1 PE=1 SV=2                                                                                       | EEA1_HUMAN  | 162,468.10 | 100.00% | 2  | 2  | 2  | 4.04%  |
| c(+)-Tiva1 | Eukaryotic translation initiation factor 3 subunit H OS=Homo sapiens GN=EIF3H PE=1 SV=1                                                          | EIF3H_HUMAN | 39,930.60  | 95.50%  | 1  | 1  | 1  | 5.68%  |
| c(+)-Tiva1 | Heterogeneous nuclear ribonucleoprotein H2 OS=Homo sapiens GN=HNRNP2 PE=1 SV=1                                                                   | HNRH2_HUMAN | 49,264.10  | 95.50%  | 1  | 1  | 1  | 3.79%  |
| c(+)-Tiva1 | Splicing factor, proline- and glutamine-rich OS=Homo sapiens GN=SFQ1 PE=1 SV=2                                                                   | SFPQ_HUMAN  | 76,149.50  | 100.00% | 7  | 7  | 7  | 15.00% |
| c(+)-Tiva1 | Glycogen synthase kinase-3 beta OS=Homo sapiens GN=GSK3B PE=1 SV=2                                                                               | GSK3B_HUMAN | 46,745.30  | 100.00% | 4  | 4  | 4  | 17.10% |
| c(+)-Tiva1 | V-type proton ATPase catalytic subunit A OS=Homo sapiens GN=ATP6V1A PE=1 SV=2                                                                    | VATA_HUMAN  | 68,305.50  | 94.80%  | 1  | 1  | 1  | 2.76%  |
| c(+)-Tiva1 | Glutathione synthetase OS=Homo sapiens GN=GSS PE=1 SV=1                                                                                          | GSHB_HUMAN  | 52,385.90  | 58.50%  | 1  | 1  | 1  | 4.22%  |
| c(+)-Tiva1 | Zinc finger protein 185 OS=Homo sapiens GN=ZNF185 PE=1 SV=3                                                                                      | ZN185_HUMAN | 73,525.40  | 100.00% | 3  | 3  | 3  | 9.29%  |
| c(+)-Tiva1 | CAD protein OS=Homo sapiens GN=CAD PE=1 SV=3                                                                                                     | PYR1_HUMAN  | 242,982.50 | 95.50%  | 1  | 1  | 1  | 0.99%  |
| c(+)-Tiva1 | Eukaryotic initiation factor 4A1 OS=Homo sapiens GN=EIF4A1 PE=1 SV=1                                                                             | IF4A1_HUMAN | 46,155.30  | 100.00% | 8  | 8  | 8  | 31.30% |
| c(+)-Tiva1 | Epilakin OS=Homo sapiens GN=EPK1 PE=1 SV=2                                                                                                       | EPIPL_HUMAN | 555,615.40 | 100.00% | 6  | 7  | 7  | 2.20%  |
| c(+)-Tiva1 | 40S ribosomal protein S3a OS=Homo sapiens GN=RP53A PE=1 SV=2                                                                                     | RS3A_HUMAN  | 29,945.30  | 100.00% | 3  | 3  | 3  | 16.30% |
| c(+)-Tiva1 | Catenin delta-1 OS=Homo sapiens GN=CTNND1 PE=1 SV=1                                                                                              | CTND1_HUMAN | 108,171.90 | 100.00% | 1  | 1  | 1  | 2.38%  |
| c(+)-Tiva1 | Peroxiredoxin-6 OS=Homo sapiens GN=PRDX6 PE=1 SV=3                                                                                               | PRDX6_HUMAN | 25,036.10  | 100.00% | 2  | 2  | 2  | 15.20% |
| c(+)-Tiva1 | Pre-mRNA-processing factor 6 OS=Homo sapiens GN=PRPF6 PE=1 SV=1                                                                                  | PRPF6_HUMAN | 106,927.70 | 99.10%  | 1  | 1  | 1  | 1.81%  |
| c(+)-Tiva1 | NAD-dependent malic enzyme, mitochondrial OS=Homo sapiens GN=ME2 PE=1 SV=1                                                                       | MAOM_HUMAN  | 65,446.20  | 95.50%  | 1  | 1  | 1  | 5.99%  |
| c(+)-Tiva1 | Polyadenylate-binding protein 1 OS=Homo sapiens GN=PABPC1 PE=1 SV=2                                                                              | PABP1_HUMAN | 70,671.30  | 100.00% | 6  | 6  | 6  | 12.40% |
| c(+)-Tiva1 | Inorganic pyrophosphatase OS=Homo sapiens GN=PPA1 PE=1 SV=2                                                                                      | IPYR_HUMAN  | 32,660.60  | 100.00% | 1  | 1  | 1  | 7.61%  |
| c(+)-Tiva1 | Stromal interaction molecule 1 OS=Homo sapiens GN=STIM1 PE=1 SV=3                                                                                | STIM1_HUMAN | 77,424.10  | 75.80%  | 1  | 1  | 1  | 3.50%  |
| c(+)-Tiva1 | Glucose-6-phosphate 1-dehydrogenase OS=Homo sapiens GN=GGPD PE=1 SV=4                                                                            | GGPD_HUMAN  | 59,258.10  | 100.00% | 9  | 9  | 9  | 28.20% |
| c(+)-Tiva1 | Caveolin-1 OS=Homo sapiens GN=CAV1 PE=1 SV=4                                                                                                     | CAV1_HUMAN  | 20,472.20  | 100.00% | 2  | 2  | 2  | 16.30% |
| c(+)-Tiva1 | Dolichyl-diphosphooligosaccharide--protein glycosyltransferase subunit 2 OS=Homo sapiens GN=RPN2 PE=1 SV=3                                       | RPN2_HUMAN  | 69,284.80  | 100.00% | 2  | 2  | 2  | 5.55%  |
| c(+)-Tiva1 | Aminoacyl tRNA synthase complex-interacting multifunctional protein 2 OS=Homo sapiens GN=AIMP2 PE=1 SV=2                                         | AIMP2_HUMAN | 35,349.30  | 94.10%  | 1  | 1  | 1  | 5.31%  |
| c(+)-Tiva1 | Nucleoprotein TPR OS=Homo sapiens GN=TPR PE=1 SV=3                                                                                               | TPR_HUMAN   | 267,289.30 | 100.00% | 9  | 9  | 9  | 6.60%  |
| c(+)-Tiva1 | 78 kDa glucose-regulated protein OS=Homo sapiens GN=HSPA5 PE=1 SV=2                                                                              | GRP78_HUMAN | 72,334.70  | 100.00% | 30 | 35 | 40 | 46.80% |
| c(+)-Tiva1 | Serum albumin OS=Homo sapiens GN=ALB PE=1 SV=2                                                                                                   | ALBU_HUMAN  | 69,366.90  | 38.40%  | 0  | 0  | 0  | 0.00%  |
| c(+)-Tiva1 | Keratin, type I cytoskeletal 18 OS=Homo sapiens GN=KRT18 PE=1 SV=2                                                                               | K1C18_HUMAN | 48,059.00  | 100.00% | 18 | 21 | 24 | 48.40% |
| c(+)-Tiva1 | 40S ribosomal protein S27 OS=Homo sapiens GN=RP527 PE=1 SV=3                                                                                     | RS27_HUMAN  | 9,460.90   | 16.90%  | 0  | 0  | 0  | 0.00%  |
| c(+)-Tiva1 | Calnexin OS=Homo sapiens GN=CANX PE=1 SV=2                                                                                                       | CALX_HUMAN  | 67,570.20  | 100.00% | 3  | 3  | 3  | 11.80% |
| c(+)-Tiva1 | Cohesin subunit SA-2 OS=Homo sapiens GN=STAG2 PE=1 SV=3                                                                                          | STAG2_HUMAN | 141,331.80 | 95.50%  | 1  | 1  | 1  | 2.11%  |
| c(+)-Tiva1 | Double-strand break repair protein MRE11A OS=Homo sapiens GN=MRE11A PE=1 SV=3                                                                    | MRE11_HUMAN | 80,595.10  | 93.40%  | 1  | 1  | 1  | 3.25%  |
| c(+)-Tiva1 | Malate dehydrogenase, mitochondrial OS=Homo sapiens GN=MDH2 PE=1 SV=3                                                                            | MDHM_HUMAN  | 35,503.70  | 100.00% | 2  | 2  | 2  | 10.70% |
| c(+)-Tiva1 | Drebrin OS=Homo sapiens GN=DBN1 PE=1 SV=4                                                                                                        | DREB_HUMAN  | 71,428.60  | 100.00% | 17 | 20 | 23 | 39.10% |
| c(+)-Tiva1 | Leucine-rich repeat flightless-interacting protein 2 OS=Homo sapiens GN=LRRFIP2 PE=1 SV=1                                                        | LRRF2_HUMAN | 82,174.50  | 100.00% | 2  | 2  | 2  | 3.74%  |
| c(+)-Tiva1 | T-complex protein 1 subunit beta OS=Homo sapiens GN=CT2 PE=1 SV=4                                                                                | TCPB_HUMAN  | 57,489.90  | 100.00% | 4  | 4  | 4  | 14.80% |
| c(+)-Tiva1 | Tubulin alpha-1B chain OS=Homo sapiens GN=TUBA1B PE=1 SV=1                                                                                       | TBA1B_HUMAN | 50,151.70  | 95.50%  | 1  | 1  | 1  | 2.88%  |
| c(+)-Tiva1 | DNA replication licensing factor MCM2 OS=Homo sapiens GN=MCM2 PE=1 SV=4                                                                          | MCM2_HUMAN  | 101,898.10 | 99.90%  | 1  | 1  | 1  | 1.88%  |
| c(+)-Tiva1 | Desmin OS=Homo sapiens GN=DES PE=1 SV=3                                                                                                          | DESM_HUMAN  | 53,536.60  | 100.00% | 2  | 3  | 3  | 1.91%  |
| c(+)-Tiva1 | Tubulin alpha-1A chain OS=Homo sapiens GN=TUBA1A PE=1 SV=1                                                                                       | TBA1A_HUMAN | 50,135.70  | 100.00% | 12 | 13 | 13 | 46.60% |
| c(+)-Tiva1 | Myosin light chain 6B OS=Homo sapiens GN=MYL6B PE=1 SV=1                                                                                         | MYL6B_HUMAN | 22,764.10  | 64.60%  | 0  | 0  | 0  | 0.00%  |
| c(+)-Tiva1 | Niban-like protein 1 OS=Homo sapiens GN=FAM129B PE=1 SV=3                                                                                        | NIBL1_HUMAN | 84,138.60  | 94.20%  | 1  | 1  | 1  | 1.74%  |
| c(+)-Tiva1 | Vinculin OS=Homo sapiens GN=VCL PE=1 SV=4                                                                                                        | VINC_HUMAN  | 123,801.30 | 5.60%   | 0  | 0  | 0  | 0.00%  |
| c(+)-Tiva1 | Regulator of chromosome condensation OS=Homo sapiens GN=RCC1 PE=1 SV=1                                                                           | RCC1_HUMAN  | 44,967.80  | 100.00% | 2  | 2  | 2  | 14.00% |
| c(+)-Tiva1 | Cell division control protein 42 homolog OS=Homo sapiens GN=CD42 PE=1 SV=2                                                                       | CDC42_HUMAN | 21,258.80  | 95.50%  | 1  | 1  | 1  | 11.00% |
| c(+)-Tiva1 | Apelin receptor OS=Homo sapiens GN=APLNR PE=1 SV=1                                                                                               | APJ_HUMAN   | 42,661.10  | 85.00%  | 1  | 1  | 2  | 2.11%  |
| c(+)-Tiva1 | Histone-binding protein RBBP7 OS=Homo sapiens GN=RBBP7 PE=1 SV=1                                                                                 | RBBP7_HUMAN | 47,820.00  | 95.50%  | 1  | 1  | 1  | 7.29%  |
| c(+)-Tiva1 | Filamin-B OS=Homo sapiens GN=FLNB PE=1 SV=2                                                                                                      | FLNB_HUMAN  | 278,158.80 | 100.00% | 8  | 8  | 8  | 5.30%  |
| c(+)-Tiva1 | Heat shock protein beta-1 OS=Homo sapiens GN=HSPB1 PE=1 SV=2                                                                                     | HSPB1_HUMAN | 22,782.60  | 95.50%  | 1  | 1  | 1  | 8.29%  |
| c(+)-Tiva1 | Poly(ADP-ribose) polymerase 1 OS=Homo sapiens GN=PARP1 PE=1 SV=4                                                                                 | PARP1_HUMAN | 113,087.80 | 95.50%  | 1  | 1  | 1  | 1.48%  |
| c(+)-Tiva1 | GTP-binding nuclear protein Ran OS=Homo sapiens GN=GAN PE=1 SV=3                                                                                 | RAN_HUMAN   | 24,423.10  | 100.00% | 3  | 3  | 3  | 20.40% |
| c(+)-Tiva1 | Poly(RC)-binding protein 2 OS=Homo sapiens GN=PCBP2 PE=1 SV=1                                                                                    | PCBP2_HUMAN | 38,580.90  | 95.50%  | 1  | 1  | 1  | 8.49%  |
| c(+)-Tiva1 | 14-3-3 protein theta OS=Homo sapiens GN=YWHAQ PE=1 SV=1                                                                                          | 1433T_HUMAN | 27,765.40  | 95.50%  | 1  | 1  | 1  | 5.71%  |
| c(+)-Tiva1 | 60S ribosomal protein L10 OS=Homo sapiens GN=RPL10 PE=1 SV=4                                                                                     | RL10_HUMAN  | 24,604.60  | 95.50%  | 1  | 1  | 1  | 12.60% |
| c(+)-Tiva1 | Unconventional myosin-Va OS=Homo sapiens GN=MYO5A PE=1 SV=2                                                                                      | MYO5A_HUMAN | 215,412.60 | 100.00% | 1  | 1  | 1  | 1.46%  |
| c(+)-Tiva1 | ERO1-like protein alpha OS=Homo sapiens GN=ERO1L PE=1 SV=2                                                                                       | ERO1A_HUMAN | 54,394.70  | 100.00% | 5  | 5  | 5  | 20.50% |
| c(+)-Tiva1 | Integrin alpha-2 OS=Homo sapiens GN=ITGA2 PE=1 SV=1                                                                                              | ITA2_HUMAN  | 129,297.90 | 100.00% | 2  | 2  | 2  | 3.98%  |
| c(+)-Tiva1 | Ras-related protein Rab-11A OS=Homo sapiens GN=RAB11A PE=1 SV=3                                                                                  | RB11A_HUMAN | 24,393.90  | 87.00%  | 1  | 1  | 1  | 4.17%  |
| c(+)-Tiva1 | Heterogeneous nuclear ribonucleoprotein D0 OS=Homo sapiens GN=HNRNPD PE=1 SV=1                                                                   | HNRPD_HUMAN | 38,434.50  | 100.00% | 2  | 2  | 2  | 9.01%  |
| c(+)-Tiva1 | Pre-mRNA-processing-splicing factor 8 OS=Homo sapiens GN=PRPF8 PE=1 SV=2                                                                         | PRPF8_HUMAN | 273,608.60 | 100.00% | 1  | 1  | 1  | 0.60%  |
| c(+)-Tiva1 | Actin-related protein 2/3 complex subunit 1B OS=Homo sapiens GN=ARPC1B PE=1 SV=3                                                                 | ARC1B_HUMAN | 40,949.80  | 100.00% | 2  | 2  | 2  | 9.68%  |
| c(+)-Tiva1 | Chloride intracellular channel protein 1 OS=Homo sapiens GN=CLIC1 PE=1 SV=4                                                                      | CLIC1_HUMAN | 26,923.30  | 100.00% | 2  | 2  | 2  | 12.40% |
| c(+)-Tiva1 | Guanine nucleotide-binding protein-like 3 OS=Homo sapiens GN=GNL3 PE=1 SV=2                                                                      | GNL3_HUMAN  | 61,994.70  | 100.00% | 1  | 1  | 1  | 4.37%  |
| c(+)-Tiva1 | Actin-related protein 2/3 complex subunit 1A OS=Homo sapiens GN=ARPC1A PE=1 SV=2                                                                 | ARC1A_HUMAN | 41,569.20  | 100.00% | 2  | 2  | 2  | 12.40% |
| c(+)-Tiva1 | 26S proteasome non-ATPase regulatory subunit 3 OS=Homo sapiens GN=PSMD3 PE=1 SV=2                                                                | PSMD3_HUMAN | 60,979.60  | 100.00% | 2  | 2  | 2  | 5.24%  |
| c(+)-Tiva1 | Prolyl 4-hydroxylase subunit alpha-1 OS=Homo sapiens GN=P4HA1 PE=1 SV=2                                                                          | P4HA1_HUMAN | 61,051.60  | 100.00% | 2  | 2  | 2  | 5.24%  |
| c(+)-Tiva1 | Heat shock cognate 71 kDa protein OS=Homo sapiens GN=HSPA8 PE=1 SV=1                                                                             | HSP7C_HUMAN | 70,899.80  | 100.00% | 6  | 8  | 8  | 16.90% |
| c(+)-Tiva1 | Insulin-like growth factor 2 mRNA-binding protein 1 OS=Homo sapiens GN=IGF2BP1 PE=1 SV=2                                                         | IF2B1_HUMAN | 63,480.50  | 73.30%  | 1  | 1  | 1  | 1.73%  |
| c(+)-Tiva1 | Palmitoyl-protein thioesterase 1 OS=Homo sapiens GN=PPT1 PE=1 SV=1                                                                               | PPT1_HUMAN  | 34,194.00  | 100.00% | 2  | 2  | 2  | 10.80% |
| c(+)-Tiva1 | Eukaryotic translation initiation factor 3 subunit F OS=Homo sapiens GN=EIF3F PE=1 SV=1                                                          | EIF3F_HUMAN | 37,563.50  | 95.50%  | 1  | 1  | 1  | 4.76%  |
| c(+)-Tiva1 | 40S ribosomal protein S28 OS=Homo sapiens GN=RP528 PE=1 SV=1                                                                                     | RS28_HUMAN  | 7,840.90   | 18.90%  | 0  | 0  | 0  | 0.00%  |
| c(+)-Tiva1 | 26S proteasome non-ATPase regulatory subunit 13 OS=Homo sapiens GN=PSMD13 PE=1 SV=2                                                              | PSD13_HUMAN | 42,945.90  | 87.70%  | 1  | 1  | 1  | 4.52%  |
| c(+)-Tiva1 | Poly(U)-binding-splicing factor PUF60 OS=Homo sapiens GN=PUF60 PE=1 SV=1                                                                         | PUF60_HUMAN | 59,875.60  | 99.90%  | 1  | 1  | 1  | 3.94%  |
| c(+)-Tiva1 | 26S proteasome non-ATPase regulatory subunit 12 OS=Homo sapiens GN=PSMD12 PE=1 SV=3                                                              | PSD12_HUMAN | 52,906.20  | 100.00% | 2  | 2  | 2  | 5.92%  |
| c(+)-Tiva1 | Hepatocyte growth factor receptor OS=Homo sapiens GN=MET PE=1 SV=4                                                                               | MET_HUMAN   | 155,543.40 | 100.00% | 3  | 3  | 3  | 4.75%  |
| c(+)-Tiva1 | Malate dehydrogenase, cytoplasmic OS=Homo sapiens GN=MDH1 PE=1 SV=4                                                                              | MDHC_HUMAN  | 36,426.90  | 95.50%  | 1  | 1  | 1  | 5.99%  |
| c(+)-Tiva1 | Nucleoporin Nup37 OS=Homo sapiens GN=NUP37 PE=1 SV=1                                                                                             | NUP37_HUMAN | 36,707.20  | 90.30%  | 1  | 1  | 1  | 4.91%  |
| c(+)-Tiva1 | Far upstream element-binding protein 2 OS=Homo sapiens GN=KHSPR PE=1 SV=4                                                                        | FUBP2_HUMAN | 73,115.60  | 100.00% | 2  | 2  | 2  | 4.64%  |
| c(+)-Tiva1 | Fructose-bisphosphate aldolase A OS=Homo sapiens GN=ALDOA PE=1 SV=2                                                                              | ALDOA_HUMAN | 39,420.60  | 100.00% | 5  | 5  | 5  | 25.00% |
| c(+)-Tiva1 | Septin-9 OS=Homo sapiens GN=SEPT9 PE=1 SV=2                                                                                                      | SEPT9_HUMAN | 65,402.30  | 100.00% | 2  | 2  | 2  | 5.12%  |
| c(+)-Tiva1 | UDP-glucose:glycoprotein glucosyltransferase 1 OS=Homo sapiens GN=UGGT1 PE=1 SV=3                                                                | UGGG1_HUMAN | 177,195.00 | 100.00% | 3  | 3  | 3  | 2.96%  |
| c(+)-Tiva1 | Threonine-tRNA ligase, cytoplasmic OS=Homo sapiens GN=TARS PE=1 SV=3                                                                             | SYTC_HUMAN  | 83,437.80  | 64.40%  | 1  | 1  | 1  | 2.77%  |

|            |                                                                                                                                          |              |            |         |     |     |     |        |
|------------|------------------------------------------------------------------------------------------------------------------------------------------|--------------|------------|---------|-----|-----|-----|--------|
| c(-)-Tiva1 | Tubulin beta-2B chain OS=Homo sapiens GN=TUBB2B PE=1 SV=1                                                                                | TBB2B_HUMAN  | 49,953.10  | 95.50%  | 1   | 1   | 3   | 8.76%  |
| c(+)-Tiva1 | 60 kDa heat shock protein, mitochondrial OS=Homo sapiens GN=HSPD1 PE=1 SV=2                                                              | CH60_HUMAN   | 61,055.70  | 100.00% | 8   | 8   | 8   | 23.40% |
| c(+)-Tiva1 | Nuclear pore complex protein Nup155 OS=Homo sapiens GN=NUP155 PE=1 SV=1                                                                  | NU155_HUMAN  | 155,203.00 | 52.70%  | 1   | 1   | 1   | 0.94%  |
| c(+)-Tiva1 | Heterogeneous nuclear ribonucleoprotein A1-like 2 OS=Homo sapiens GN=HNRNPA1L2 PE=2 SV=2                                                 | RA1L2_HUMAN  | 34,225.40  | 41.00%  | 0   | 0   | 0   | 0.00%  |
| c(+)-Tiva1 | Putative tropomyosin alpha-3 chain-like protein OS=Homo sapiens GN=SPTB PE=5 SV=2                                                        | TPM3L1_HUMAN | 26,270.00  | 98.10%  | 1   | 1   | 1   | 6.28%  |
| c(+)-Tiva1 | Tropomodulin-3 OS=Homo sapiens GN=TMOD3 PE=1 SV=1                                                                                        | TMOD3_HUMAN  | 39,596.10  | 100.00% | 3   | 3   | 3   | 15.30% |
| c(+)-Tiva1 | Spectrin beta chain, non-erythrocytic 1 OS=Homo sapiens GN=SPTBN1 PE=1 SV=2                                                              | SPTB1_HUMAN  | 274,613.40 | 100.00% | 130 | 169 | 182 | 62.70% |
| c(+)-Tiva1 | Non-POU domain-containing octamer-binding protein OS=Homo sapiens GN=NONO PE=1 SV=4                                                      | NONO_HUMAN   | 54,231.60  | 100.00% | 4   | 4   | 4   | 14.00% |
| c(+)-Tiva1 | Spectrin beta chain, erythrocytic OS=Homo sapiens GN=SPTB PE=1 SV=5                                                                      | SPTB1_HUMAN  | 246,471.60 | 100.00% | 4   | 6   | 6   | 2.25%  |
| c(+)-Tiva1 | Reticulon-4 OS=Homo sapiens GN=RTNA PE=1 SV=2                                                                                            | RTNA_HUMAN   | 129,934.60 | 95.50%  | 1   | 1   | 1   | 1.17%  |
| c(+)-Tiva1 | Heterogeneous nuclear ribonucleoprotein A/B OS=Homo sapiens GN=HNRNPAB PE=1 SV=2                                                         | ROAA_HUMAN   | 36,225.20  | 89.90%  | 1   | 1   | 1   | 4.52%  |
| c(+)-Tiva1 | T-complex protein 1 subunit zeta OS=Homo sapiens GN=CCTGA PE=1 SV=3                                                                      | TCPZ_HUMAN   | 58,025.30  | 100.00% | 5   | 5   | 5   | 14.70% |
| c(+)-Tiva1 | Putative heat shock protein HSP 90-alpha A5 OS=Homo sapiens GN=HSP90AA5P PE=1 SV=1                                                       | HS905_HUMAN  | 38,738.70  | 93.10%  | 1   | 1   | 1   | 5.39%  |
| c(+)-Tiva1 | Nuclear pore complex protein Nup133 OS=Homo sapiens GN=NUP133 PE=1 SV=2                                                                  | NU133_HUMAN  | 128,984.00 | 99.90%  | 1   | 1   | 1   | 1.38%  |
| c(+)-Tiva1 | Polyadenylate-binding protein 2 OS=Homo sapiens GN=PABPN1 PE=1 SV=3                                                                      | PABP2_HUMAN  | 32,749.50  | 7.90%   | 0   | 0   | 0   | 0.00%  |
| c(+)-Tiva1 | RuvB-like 1 OS=Homo sapiens GN=RUVBL1 PE=1 SV=1                                                                                          | RUVB1_HUMAN  | 50,229.40  | 100.00% | 1   | 1   | 1   | 7.68%  |
| c(+)-Tiva1 | Actin, cytoplasmic 1 OS=Homo sapiens GN=ACTB PE=1 SV=1                                                                                   | ACTB_HUMAN   | 41,737.80  | 100.00% | 14  | 28  | 80  | 48.00% |
| c(+)-Tiva1 | Nucleoside diphosphate kinase B OS=Homo sapiens GN=NME2 PE=1 SV=1                                                                        | NDKB_HUMAN   | 17,298.30  | 74.60%  | 1   | 1   | 1   | 12.50% |
| c(+)-Tiva1 | Dihydrolipoylysine-residue acetyltransferase component of pyruvate dehydrogenase complex, mitochondrial OS=Homo sapiens GN=PDG PE=1 SV=3 | ODP2_HUMAN   | 68,997.20  | 95.40%  | 1   | 1   | 1   | 2.63%  |
| c(+)-Tiva1 | 6-phosphogluconate dehydrogenase, decarboxylating OS=Homo sapiens GN=PGD PE=1 SV=3                                                       | 6PGD_HUMAN   | 53,141.90  | 100.00% | 8   | 8   | 8   | 34.40% |
| c(+)-Tiva1 | Actin, aortic smooth muscle OS=Homo sapiens GN=ACTA2 PE=1 SV=1                                                                           | ACTA_HUMAN   | 42,010.10  | 100.00% | 15  | 28  | 40  | 36.30% |
| c(+)-Tiva1 | Protein diaphanous homolog 2 OS=Homo sapiens GN=DIAPH2 PE=1 SV=1                                                                         | DIAP2_HUMAN  | 125,575.80 | 25.20%  | 0   | 0   | 0   | 0.00%  |
| c(+)-Tiva1 | 60S ribosomal protein L12 OS=Homo sapiens GN=RLI2 PE=1 SV=1                                                                              | RLI2_HUMAN   | 17,819.10  | 100.00% | 2   | 2   | 2   | 18.80% |
| c(+)-Tiva1 | Tubulin beta-1 chain OS=Homo sapiens GN=TUBB1 PE=1 SV=1                                                                                  | TBB1_HUMAN   | 50,327.00  | 100.00% | 2   | 2   | 2   | 3.99%  |
| c(+)-Tiva1 | Thioredoxin domain-containing protein 16 OS=Homo sapiens GN=TXND1C16 PE=2 SV=4                                                           | TXD16_HUMAN  | 93,575.00  | 96.30%  | 0   | 0   | 0   | 0.00%  |
| c(+)-Tiva1 | 60S ribosomal protein L11 OS=Homo sapiens GN=RLI11 PE=1 SV=2                                                                             | RLI11_HUMAN  | 20,253.20  | 91.60%  | 1   | 1   | 1   | 7.87%  |
| c(+)-Tiva1 | Unconventional myosin-Vb OS=Homo sapiens GN=MYOSB PE=1 SV=3                                                                              | MYOSB_HUMAN  | 213,676.50 | 100.00% | 3   | 3   | 3   | 3.68%  |
| c(+)-Tiva1 | Aldo-keto reductase family 1 member B10 OS=Homo sapiens GN=AKR1B10 PE=1 SV=2                                                             | AK1BA_HUMAN  | 36,020.40  | 100.00% | 8   | 8   | 8   | 39.20% |
| c(+)-Tiva1 | Eukaryotic initiation factor 4A-III OS=Homo sapiens GN=EIF4A3 PE=1 SV=4                                                                  | IF4A3_HUMAN  | 46,872.40  | 41.90%  | 0   | 0   | 0   | 0.00%  |
| c(+)-Tiva1 | Glutamate dehydrogenase 1, mitochondrial OS=Homo sapiens GN=GLUD1 PE=1 SV=2                                                              | DHE3_HUMAN   | 61,399.70  | 100.00% | 4   | 4   | 4   | 9.50%  |
| c(+)-Tiva1 | Major vault protein OS=Homo sapiens GN=MVP PE=1 SV=4                                                                                     | MVP_HUMAN    | 99,326.00  | 100.00% | 7   | 7   | 8   | 15.20% |
| c(+)-Tiva1 | 40S ribosomal protein S17-like OS=Homo sapiens GN=RP517L PE=2 SV=1                                                                       | RS17L_HUMAN  | 15,550.50  | 95.50%  | 1   | 1   | 1   | 16.30% |
| c(+)-Tiva1 | Myosin light polypeptide 6 OS=Homo sapiens GN=MYL6 PE=1 SV=2                                                                             | MYL6_HUMAN   | 16,929.80  | 100.00% | 5   | 6   | 6   | 60.30% |
| c(+)-Tiva1 | Insulin-like growth factor 2 mRNA-binding protein 3 OS=Homo sapiens GN=IGF2BP3 PE=1 SV=2                                                 | IF2B3_HUMAN  | 63,706.00  | 99.90%  | 2   | 2   | 2   | 5.18%  |
| c(+)-Tiva1 | Proteasome subunit alpha type-7 OS=Homo sapiens GN=PSMA7 PE=1 SV=1                                                                       | PSA7_HUMAN   | 27,887.20  | 95.50%  | 1   | 1   | 1   | 6.05%  |
| c(+)-Tiva1 | Methionine--tRNA ligase, cytoplasmic OS=Homo sapiens GN=MARS PE=1 SV=2                                                                   | SYMC_HUMAN   | 101,117.50 | 100.00% | 6   | 6   | 6   | 10.60% |
| c(+)-Tiva1 | Tumor suppressor p53-binding protein 1 OS=Homo sapiens GN=TP53BP1 PE=1 SV=2                                                              | TP53B_HUMAN  | 213,572.20 | 100.00% | 1   | 1   | 1   | 1.27%  |
| c(+)-Tiva1 | Importin subunit beta-1 OS=Homo sapiens GN=KPNB1 PE=1 SV=2                                                                               | IMB1_HUMAN   | 97,171.30  | 100.00% | 5   | 5   | 5   | 7.42%  |
| c(+)-Tiva1 | Cofilin-1 OS=Homo sapiens GN=CF1 PE=1 SV=3                                                                                               | COF1_HUMAN   | 18,503.20  | 100.00% | 4   | 6   | 6   | 35.50% |
| c(+)-Tiva1 | Guanine nucleotide-binding protein subunit beta-2-like 1 OS=Homo sapiens GN=GNB2L1 PE=1 SV=3                                             | GBLP_HUMAN   | 35,077.00  | 100.00% | 11  | 11  | 11  | 64.40% |
| c(+)-Tiva1 | LDLR chaperone MESD OS=Homo sapiens GN=MESDC2 PE=1 SV=2                                                                                  | MESD_HUMAN   | 26,077.90  | 95.50%  | 1   | 1   | 1   | 7.26%  |
| c(+)-Tiva1 | Dolichyl-diphosphooligosaccharide--protein glycosyltransferase subunit 1 OS=Homo sapiens GN=RPN1 PE=1 SV=1                               | RPN1_HUMAN   | 68,571.00  | 99.90%  | 1   | 1   | 1   | 4.12%  |
| c(+)-Tiva1 | Proteasome subunit alpha type-4 OS=Homo sapiens GN=PSMA4 PE=1 SV=1                                                                       | PSA4_HUMAN   | 29,484.80  | 100.00% | 2   | 3   | 3   | 17.60% |
| c(+)-Tiva1 | Neutrophil gelatinase-associated lipocalin OS=Homo sapiens GN=LCN2 PE=1 SV=2                                                             | NGAL_HUMAN   | 22,588.90  | 100.00% | 3   | 3   | 3   | 26.80% |
| c(+)-Tiva1 | Myoferlin OS=Homo sapiens GN=MYOF PE=1 SV=1                                                                                              | MYOF_HUMAN   | 234,715.60 | 100.00% | 4   | 4   | 4   | 3.40%  |
| c(+)-Tiva1 | Ladinin-1 OS=Homo sapiens GN=LAD1 PE=1 SV=2                                                                                              | LAD1_HUMAN   | 57,131.80  | 100.00% | 6   | 6   | 6   | 18.80% |
| c(+)-Tiva1 | Catenin beta-1 OS=Homo sapiens GN=CTNNB1 PE=1 SV=1                                                                                       | CTNB1_HUMAN  | 85,497.00  | 100.00% | 1   | 2   | 2   | 4.48%  |
| c(+)-Tiva1 | Nascent polypeptide-associated complex subunit alpha OS=Homo sapiens GN=NACA PE=1 SV=1                                                   | NACA_HUMAN   | 23,383.30  | 100.00% | 2   | 2   | 2   | 13.50% |
| c(+)-Tiva1 | Profilin-1 OS=Homo sapiens GN=PFN1 PE=1 SV=2                                                                                             | PROF1_HUMAN  | 15,054.30  | 85.90%  | 1   | 1   | 1   | 10.00% |
| c(+)-Tiva1 | Bifunctional purine biosynthesis protein PURH OS=Homo sapiens GN=ATIC PE=1 SV=3                                                          | PUR9_HUMAN   | 64,616.50  | 95.20%  | 1   | 1   | 1   | 3.38%  |
| c(+)-Tiva1 | Stress-70 protein, mitochondrial OS=Homo sapiens GN=HSPA9 PE=1 SV=2                                                                      | GRP75_HUMAN  | 73,681.30  | 100.00% | 3   | 3   | 3   | 6.63%  |
| c(+)-Tiva1 | Fructose-bisphosphate aldolase C OS=Homo sapiens GN=ALDOC PE=1 SV=2                                                                      | ALDOC_HUMAN  | 39,456.20  | 100.00% | 2   | 2   | 2   | 7.14%  |
| c(+)-Tiva1 | Keratin, type II cytoskeletal 1 OS=Homo sapiens GN=KRT1 PE=1 SV=6                                                                        | KZC1_HUMAN   | 66,040.30  | 100.00% | 10  | 10  | 11  | 26.40% |
| c(+)-Tiva1 | T-complex protein 1 subunit epsilon OS=Homo sapiens GN=CCT5 PE=1 SV=1                                                                    | TCPE_HUMAN   | 59,672.40  | 100.00% | 2   | 2   | 2   | 8.69%  |
| c(+)-Tiva1 | Peptidyl-prolyl cis-trans isomerase B OS=Homo sapiens GN=PP1B PE=1 SV=2                                                                  | PP1B_HUMAN   | 23,743.20  | 100.00% | 5   | 5   | 5   | 32.40% |
| c(+)-Tiva1 | Glyceraldehyde-3-phosphate dehydrogenase OS=Homo sapiens GN=GAPDH PE=1 SV=3                                                              | G3P_HUMAN    | 36,053.40  | 100.00% | 10  | 10  | 12  | 54.30% |
| c(+)-Tiva1 | POTE ankyrin domain family member E OS=Homo sapiens GN=POTEE PE=1 SV=3                                                                   | POTEE_HUMAN  | 121,366.20 | 100.00% | 2   | 2   | 2   | 2.79%  |
| c(+)-Tiva1 | Lanosterol synthase OS=Homo sapiens GN=LSS PE=1 SV=1                                                                                     | ERG7_HUMAN   | 83,310.00  | 95.50%  | 1   | 1   | 1   | 1.78%  |
| c(+)-Tiva1 | Peptidyl-prolyl cis-trans isomerase A OS=Homo sapiens GN=PP1A PE=1 SV=2                                                                  | PP1A_HUMAN   | 18,012.90  | 100.00% | 3   | 3   | 3   | 33.30% |
| c(+)-Tiva1 | Small nuclear ribonucleoprotein Sm D1 OS=Homo sapiens GN=SNRPD1 PE=1 SV=1                                                                | SMD1_HUMAN   | 13,281.90  | 95.50%  | 1   | 1   | 2   | 17.60% |
| c(+)-Tiva1 | Desmoplakin OS=Homo sapiens GN=DSP PE=1 SV=3                                                                                             | DESP_HUMAN   | 331,781.40 | 100.00% | 2   | 2   | 2   | 1.01%  |
| c(+)-Tiva1 | RNA-binding protein EWS OS=Homo sapiens GN=EWSR1 PE=1 SV=1                                                                               | EWS_HUMAN    | 68,478.40  | 99.80%  | 1   | 1   | 1   | 2.13%  |
| c(+)-Tiva1 | L-lactate dehydrogenase A chain OS=Homo sapiens GN=LDHA PE=1 SV=2                                                                        | LDHA_HUMAN   | 36,689.20  | 100.00% | 2   | 2   | 2   | 7.23%  |
| c(+)-Tiva1 | Proteasome subunit beta type-3 OS=Homo sapiens GN=PSMB3 PE=1 SV=2                                                                        | PSB3_HUMAN   | 22,949.60  | 95.50%  | 1   | 1   | 1   | 8.78%  |
| c(+)-Tiva1 | Proteasome subunit alpha type-7-like OS=Homo sapiens GN=PSMA8 PE=1 SV=3                                                                  | PSA7L_HUMAN  | 28,530.20  | 95.50%  | 1   | 1   | 1   | 5.47%  |
| c(+)-Tiva1 | TOM1-like protein 2 OS=Homo sapiens GN=TOM1L2 PE=1 SV=1                                                                                  | TM1L2_HUMAN  | 55,556.70  | 95.50%  | 1   | 1   | 1   | 4.54%  |
| c(+)-Tiva1 | Arginine--tRNA ligase, cytoplasmic OS=Homo sapiens GN=RARS PE=1 SV=2                                                                     | SYRC_HUMAN   | 75,382.00  | 100.00% | 1   | 1   | 1   | 2.42%  |
| c(+)-Tiva1 | Galectin-1 OS=Homo sapiens GN=LGALS1 PE=1 SV=2                                                                                           | LEG1_HUMAN   | 14,715.80  | 94.10%  | 1   | 1   | 1   | 11.90% |
| c(+)-Tiva1 | Proteasome subunit beta type-5 OS=Homo sapiens GN=PSMB5 PE=1 SV=3                                                                        | PSB5_HUMAN   | 28,481.00  | 100.00% | 2   | 2   | 2   | 9.51%  |
| c(+)-Tiva1 | Keratin, type II cytoskeletal 75 OS=Homo sapiens GN=KRT75 PE=1 SV=2                                                                      | KZC75_HUMAN  | 59,561.30  | 90.30%  | 1   | 1   | 1   | 1.63%  |
| c(+)-Tiva1 | Heat shock 70 kDa protein 1A/1B OS=Homo sapiens GN=HSPA1A PE=1 SV=5                                                                      | HSP71_HUMAN  | 70,054.00  | 100.00% | 7   | 7   | 7   | 18.60% |
| c(+)-Tiva1 | Protein SET OS=Homo sapiens GN=SET PE=1 SV=3                                                                                             | SET_HUMAN    | 33,489.40  | 87.10%  | 1   | 1   | 1   | 4.83%  |
| c(+)-Tiva1 | ADP-ribosylation factor 1 OS=Homo sapiens GN=ARF1 PE=1 SV=2                                                                              | ARF1_HUMAN   | 20,697.60  | 100.00% | 2   | 2   | 2   | 22.70% |
| c(+)-Tiva1 | Actin, alpha cardiac muscle 1 OS=Homo sapiens GN=ACTC1 PE=1 SV=1                                                                         | ACTC_HUMAN   | 42,020.10  | 95.50%  | 1   | 4   | 7   | 7.16%  |
| c(+)-Tiva1 | Glutathione S-transferase P OS=Homo sapiens GN=GSTP1 PE=1 SV=2                                                                           | GSTP1_HUMAN  | 23,356.70  | 100.00% | 6   | 6   | 6   | 56.20% |
| c(+)-Tiva1 | Ephrin type-A receptor 2 OS=Homo sapiens GN=EPHA2 PE=1 SV=2                                                                              | EPHA2_HUMAN  | 108,266.80 | 95.50%  | 1   | 1   | 1   | 1.64%  |
| c(+)-Tiva1 | Tubulin beta-3 chain OS=Homo sapiens GN=TUBB3 PE=1 SV=2                                                                                  | TBB3_HUMAN   | 50,432.70  | 13.80%  | 0   | 0   | 0   | 0.00%  |
| c(+)-Tiva1 | DBIRD complex subunit KIAA1967 OS=Homo sapiens GN=KIAA1967 PE=1 SV=2                                                                     | K1967_HUMAN  | 102,903.10 | 100.00% | 4   | 4   | 4   | 11.60% |
| c(+)-Tiva1 | Protein S100-A10 OS=Homo sapiens GN=S100A10 PE=1 SV=2                                                                                    | S10AA_HUMAN  | 11,203.50  | 91.50%  | 1   | 1   | 1   | 10.30% |
| c(+)-Tiva1 | Lysine--tRNA ligase OS=Homo sapiens GN=KARS PE=1 SV=3                                                                                    | SVK_HUMAN    | 68,050.40  | 74.40%  | 1   | 1   | 1   | 2.35%  |
| c(+)-Tiva1 | Unconventional myosin-Vc OS=Homo sapiens GN=MYOSC PE=1 SV=2                                                                              | MYOSC_HUMAN  | 202,816.50 | 100.00% | 3   | 3   | 3   | 2.58%  |
| c(+)-Tiva1 | 26S protease regulatory subunit 4 OS=Homo sapiens GN=PSMC1 PE=1 SV=1                                                                     | PRS4_HUMAN   | 49,186.40  | 100.00% | 2   | 2   | 2   | 9.32%  |
| c(+)-Tiva1 | Elongation factor 1-delta OS=Homo sapiens GN=EEF1D PE=1 SV=5                                                                             | EF1D_HUMAN   | 31,121.90  | 100.00% | 2   | 2   | 2   | 12.80% |
| c(+)-Tiva1 | Dynammin-like 120 kDa protein, mitochondrial OS=Homo sapiens GN=OPA1 PE=1 SV=3                                                           | OPA1_HUMAN   | 111,633.90 | 100.00% | 6   | 6   | 6   | 8.75%  |
| c(+)-Tiva1 | Radinix OS=Homo sapiens GN=RDX PE=1 SV=1                                                                                                 | RADI_HUMAN   | 68,565.50  | 98.10%  | 1   | 1   | 1   | 2.57%  |
| c(+)-Tiva1 | Alpha-centractin OS=Homo sapiens GN=ACTR1A PE=1 SV=1                                                                                     | ACTZ_HUMAN   | 42,615.20  | 95.50%  | 1   | 1   | 1   | 4.26%  |
| c(+)-Tiva1 | Heat shock 70 kDa protein 1-like OS=Homo sapiens GN=HSPA1L PE=1 SV=2                                                                     | HS71L_HUMAN  | 70,377.10  | 100.00% | 3   | 4   | 4   | 5.93%  |
| c(+)-Tiva1 | Eukaryotic translation initiation factor 3 subunit I OS=Homo sapiens GN=EIF3I PE=1 SV=1                                                  | EIF3I_HUMAN  | 36,502.00  | 100.00% | 3   | 3   | 3   | 16.00% |
| c(+)-Tiva1 | 4F2 cell-surface antigen heavy chain OS=Homo sapiens GN=SLC3A2 PE=1 SV=3                                                                 | 4F2_HUMAN    | 67,996.40  | 100.00% | 4   | 4   | 4   | 11.10% |
| c(+)-Tiva1 | Glucose-6-phosphate isomerase OS=Homo sapiens GN=GPI PE=1 SV=4                                                                           | G6PI_HUMAN   | 63,148.50  | 100.00% | 3   | 3   | 3   | 9.86%  |
| c(+)-Tiva1 | Fatty aldehyde dehydrogenase OS=Homo sapiens GN=ALDH3A2 PE=1 SV=1                                                                        | AL3A2_HUMAN  | 54,849.80  | 75.30%  | 1   | 1   | 1   | 3.51%  |
| c(+)-Tiva1 | Keratin, type II cytoskeletal 3 OS=Homo sapiens GN=KRT3 PE=1 SV=3                                                                        | KZC3_HUMAN   | 64,418.90  | 100.00% | 2   | 2   | 2   | 3.34%  |
| c(+)-Tiva1 | Nuclear mitotic apparatus protein 1 OS=Homo sapiens GN=NUMA1 PE=1 SV=2                                                                   | NUMA1_HUMAN  | 238,259.70 | 100.00% | 9   | 9   | 9   | 7.09%  |
| c(+)-Tiva1 | Histone deacetylase 1 OS=Homo sapiens GN=HDAC1 PE=1 SV=1                                                                                 | HDAC1_HUMAN  | 55,104.10  | 15.60%  | 0   | 0   | 0   | 0.00%  |
| c(+)-Tiva1 | Ezrin OS=Homo sapiens GN=EZR PE=1 SV=4                                                                                                   | EZRI_HUMAN   | 69,414.70  | 100.00% | 11  | 13  | 13  | 26.50% |
| c(+)-Tiva1 | Transitional endoplasmic reticulum ATPase OS=Homo sapiens GN=VCP PE=1 SV=4                                                               | TERA_HUMAN   | 89,324.80  | 100.00% | 11  | 12  | 13  | 19.10% |
| c(+)-Tiva1 | Cadherin-1 OS=Homo sapiens GN=CDH1 PE=1 SV=3                                                                                             | CADH1_HUMAN  | 97,457.60  | 100.00% | 2   | 2   | 2   | 4.54%  |
| c(+)-Tiva1 | Kinesin-like protein KIF1A OS=Homo sapiens GN=KIF1A PE=1 SV=2                                                                            | KIF1A_HUMAN  | 191,066.80 | 19.00%  | 0   | 0   | 0   | 0.00%  |
| c(+)-Tiva1 | Enoyl-CoA delta isomerase 1, mitochondrial OS=Homo sapiens GN=ECI1 PE=1 SV=1                                                             | ECI1_HUMAN   | 32,816.50  | 81.40%  | 1   | 1   | 1   | 4.97%  |
| c(+)-Tiva1 | Keratin, type II cytoskeletal 4 OS=Homo sapiens GN=KRT4 PE=1 SV=4                                                                        | KZC4_HUMAN   | 57,286.10  | 100.00% | 11  | 11  | 11  | 34.50% |
| c(+)-Tiva1 | Ras-related protein Rab-1B OS=Homo sapiens GN=RAB1B PE=1 SV=1                                                                            | RAB1B_HUMAN  | 22,172.00  | 95.50%  | 1   | 1   | 1   | 8.46%  |
| c(+)-Tiva1 | Endoplasmic reticulum protein OS=Homo sapiens GN=HSP90B1 PE=1 SV=1                                                                       | ENPL_HUMAN   | 92,471.70  | 100.00% | 20  | 22  | 23  | 37.40% |
| c(+)-Tiva1 | Tubulin alpha-4A chain OS=Homo sapiens GN=TUBAA4 PE=1 SV=1                                                                               | TBAA4_HUMAN  | 49,924.60  | 100.00% | 2   | 2   | 2   | 11.60% |
| c(+)-Tiva1 | T-complex protein 1 subunit gamma OS=Homo sapiens GN=CCT3 PE=1 SV=4                                                                      | TCPG_HUMAN   | 60,535.40  | 100.00% | 2   | 2   | 2   | 5.87%  |
| c(+)-Tiva1 | 40S ribosomal protein S27-like OS=Homo sapiens GN=RP527L PE=1 SV=3                                                                       | RS27L_HUMAN  | 9,477.00   | 26.40%  | 0   | 0   | 0   | 0.00%  |
| c(+)-Tiva1 | Serine/arginine-rich splicing factor 1 OS=Homo sapiens GN=SRSF1 PE=1 SV=2                                                                | SRSF1_HUMAN  | 27,745.10  | 100.00% | 2   | 2   | 2   | 8.87%  |
| c(+)-Tiva1 | L-lactate dehydrogenase B chain OS=Homo sapiens GN=LDHB PE=1 SV=2                                                                        | LDHB_HUMAN   | 36,638.60  | 100.00% | 3   | 3   | 3   | 13.50% |
| c(+)-Tiva1 | Cleavage stimulation factor subunit 3 OS=Homo sapiens GN=CTSF3 PE=1 SV=1                                                                 | CSTF3_HUMAN  | 82,924.20  | 93.60%  | 1   | 1   | 1   | 1.95%  |
| c(+)-Tiva1 | 40S ribosomal protein S11 OS=Homo sapiens GN=RP511 PE=1 SV=3                                                                             | RS11_HUMAN   | 18,431.30  | 100.00% | 2   | 2   | 2   | 18.40% |
| c(+)-Tiva1 | Aspartate aminotransferase, mitochondrial OS=Homo sapiens GN=GOT2 PE=1 SV=3                                                              | AATM_HUMAN   | 47,518.60  | 99.90%  | 1   | 1   | 1   | 3.49%  |
| c(+)-Tiva1 | 60S ribosomal protein L19 OS=Homo sapiens GN=RLP19 PE=1 SV=1                                                                             | RL19_HUMAN   | 23,467.40  | 44.80%  | 0   | 0   | 0   | 0.00%  |
| c(+)-Tiva1 | Coatomer subunit alpha OS=Homo sapiens GN=COPA PE=1 SV=2                                                                                 | COPA_HUMAN   | 138,349.30 | 100.00% | 10  | 10  | 11  | 15.00% |
| c(+)-Tiva1 | Serpin H1 OS=Homo sapiens GN=SERPINH1 PE=1 SV=2                                                                                          | SERP_HUMAN   | 46,442.00  | 100.00% | 3   | 3   | 3   | 12.20% |

|            |                                                                                   |                                        |              |            |         |    |    |    |        |
|------------|-----------------------------------------------------------------------------------|----------------------------------------|--------------|------------|---------|----|----|----|--------|
| c(+)-Tiva1 | Spectrin beta chain, non-erythrocytic 2                                           | OS=Homo sapiens GN=SPTBN2 PE=1 SV=3    | SPTN2_HUMAN  | 271,325.90 | 100.00% | 13 | 13 | 13 | 9.54%  |
| c(+)-Tiva1 | Proteasome subunit beta type-6                                                    | OS=Homo sapiens GN=PSMB6 PE=1 SV=4     | PSB6_HUMAN   | 25,357.90  | 100.00% | 1  | 1  | 1  | 16.30% |
| c(+)-Tiva1 | Keratin, type I cytoskeletal 9                                                    | OS=Homo sapiens GN=KRT9 PE=1 SV=3      | K1C9_HUMAN   | 62,065.90  | 100.00% | 4  | 4  | 5  | 13.30% |
| c(+)-Tiva1 | 14-3-3 protein zeta/delta                                                         | OS=Homo sapiens GN=YWHAZ PE=1 SV=1     | 1433Z_HUMAN  | 27,745.90  | 100.00% | 3  | 3  | 3  | 18.00% |
| c(+)-Tiva1 | AP-2 complex subunit alpha-1                                                      | OS=Homo sapiens GN=AP2A1 PE=1 SV=3     | AP2A1_HUMAN  | 107,548.70 | 100.00% | 2  | 2  | 2  | 2.87%  |
| c(+)-Tiva1 | Aspartate--tRNA ligase, cytoplasmic                                               | OS=Homo sapiens GN=DARS PE=1 SV=2      | SYDC_HUMAN   | 57,136.70  | 100.00% | 3  | 3  | 3  | 8.58%  |
| c(+)-Tiva1 | 26S protease regulatory subunit 7                                                 | OS=Homo sapiens GN=PSMC2 PE=1 SV=3     | PR57_HUMAN   | 48,635.60  | 100.00% | 2  | 2  | 2  | 7.39%  |
| c(+)-Tiva1 | Alpha-enolase                                                                     | OS=Homo sapiens GN=ENO1 PE=1 SV=2      | ENOA_HUMAN   | 47,170.20  | 100.00% | 6  | 6  | 6  | 24.20% |
| c(+)-Tiva1 | Filamin-A                                                                         | OS=Homo sapiens GN=FLNA PE=1 SV=4      | FLNA_HUMAN   | 280,729.40 | 100.00% | 13 | 14 | 14 | 8.88%  |
| c(+)-Tiva1 | Eukaryotic translation initiation factor 3 subunit L                              | OS=Homo sapiens GN=EIF3L PE=1 SV=1     | EIF3L_HUMAN  | 66,729.30  | 100.00% | 5  | 5  | 5  | 14.50% |
| c(+)-Tiva1 | Supervillin                                                                       | OS=Homo sapiens GN=SVIL PE=1 SV=2      | SVIL_HUMAN   | 247,747.10 | 100.00% | 16 | 16 | 16 | 13.80% |
| c(+)-Tiva1 | 40S ribosomal protein S5                                                          | OS=Homo sapiens GN=RP55 PE=1 SV=4      | RS5_HUMAN    | 22,877.00  | 100.00% | 1  | 1  | 1  | 9.80%  |
| c(+)-Tiva1 | Trifunctional enzyme subunit alpha, mitochondrial                                 | OS=Homo sapiens GN=HADHA PE=1 SV=2     | ECHA_HUMAN   | 83,001.90  | 100.00% | 1  | 1  | 1  | 2.36%  |
| c(+)-Tiva1 | Triosephosphate isomerase                                                         | OS=Homo sapiens GN=TP11 PE=1 SV=3      | TP1S_HUMAN   | 30,790.80  | 100.00% | 6  | 6  | 6  | 36.40% |
| c(+)-Tiva1 | Plastin-2                                                                         | OS=Homo sapiens GN=LCPI PE=1 SV=6      | PLSL_HUMAN   | 70,291.20  | 95.50%  | 1  | 1  | 1  | 2.55%  |
| c(+)-Tiva1 | Epoxide hydrolase 1                                                               | OS=Homo sapiens GN=EPHX1 PE=1 SV=1     | HYEP_HUMAN   | 52,951.10  | 95.50%  | 1  | 1  | 1  | 5.05%  |
| c(+)-Tiva1 | Coronin-1B                                                                        | OS=Homo sapiens GN=COR1B PE=1 SV=1     | COR1B_HUMAN  | 54,234.90  | 96.90%  | 1  | 1  | 1  | 5.93%  |
| c(+)-Tiva1 | DNA polymerase delta catalytic subunit                                            | OS=Homo sapiens GN=POLD1 PE=1 SV=2     | DPD01_HUMAN  | 123,633.50 | 67.10%  | 1  | 1  | 1  | 0.72%  |
| c(+)-Tiva1 | Myosin-11                                                                         | OS=Homo sapiens GN=MYH11 PE=1 SV=3     | MYH11_HUMAN  | 227,344.60 | 100.00% | 11 | 16 | 20 | 4.92%  |
| c(+)-Tiva1 | UPF0556 protein C19orf10                                                          | OS=Homo sapiens GN=C19orf10 PE=1 SV=1  | CS010_HUMAN  | 18,794.90  | 78.80%  | 1  | 1  | 1  | 8.67%  |
| c(+)-Tiva1 | 3-hydroxyacyl-CoA dehydrogenase type-2                                            | OS=Homo sapiens GN=HSD17B10 PE=1 SV=3  | HC02_HUMAN   | 26,923.10  | 95.50%  | 1  | 1  | 1  | 8.81%  |
| c(+)-Tiva1 | DNA replication licensing factor MCM3                                             | OS=Homo sapiens GN=MCM3 PE=1 SV=3      | MCM3_HUMAN   | 90,982.60  | 100.00% | 2  | 2  | 2  | 3.34%  |
| c(+)-Tiva1 | Myosin-10                                                                         | OS=Homo sapiens GN=MYH10 PE=1 SV=3     | MYH10_HUMAN  | 229,005.30 | 100.00% | 65 | 78 | 82 | 37.90% |
| c(+)-Tiva1 | Collagen alpha-1(VII) chain                                                       | OS=Homo sapiens GN=COL7A1 PE=1 SV=2    | CO7A1_HUMAN  | 295,217.50 | 95.50%  | 1  | 1  | 1  | 0.68%  |
| c(+)-Tiva1 | POTE ankyrin domain family member J                                               | OS=Homo sapiens GN=POTEJ PE=3 SV=1     | POTEJ_HUMAN  | 117,392.60 | 97.90%  | 1  | 1  | 1  | 2.70%  |
| c(+)-Tiva1 | Anterior gradient protein 2 homolog                                               | OS=Homo sapiens GN=AGR2 PE=1 SV=1      | AGR2_HUMAN   | 19,980.30  | 100.00% | 4  | 5  | 5  | 34.90% |
| c(+)-Tiva1 | Serine/threonine-protein phosphatase 2A 65 kDa regulatory subunit A alpha isoform | OS=Homo sapiens GN=PPP2R1A PE=1 SV=1   | 2A0A_HUMAN   | 65,309.70  | 95.50%  | 1  | 1  | 1  | 2.89%  |
| c(+)-Tiva1 | Bifunctional glutamate/proline--tRNA ligase                                       | OS=Homo sapiens GN=EPRS PE=1 SV=5      | SYEP_HUMAN   | 170,593.20 | 100.00% | 6  | 6  | 6  | 6.94%  |
| c(+)-Tiva1 | Proliferation-associated protein 2G4                                              | OS=Homo sapiens GN=PA2G4 PE=1 SV=3     | PA2G4_HUMAN  | 43,786.70  | 23.90%  | 0  | 0  | 0  | 0.00%  |
| c(+)-Tiva1 | Transmembrane 9 superfamily member 3                                              | OS=Homo sapiens GN=TM9SF3 PE=1 SV=2    | TM9S3_HUMAN  | 67,890.80  | 78.20%  | 1  | 1  | 1  | 4.41%  |
| c(+)-Tiva1 | Desmoglein-2                                                                      | OS=Homo sapiens GN=DSG2 PE=1 SV=2      | DSG2_HUMAN   | 122,294.40 | 98.60%  | 0  | 0  | 0  | 0.00%  |
| c(+)-Tiva1 | Retinoic acid-induced protein 3                                                   | OS=Homo sapiens GN=GPCR5A PE=1 SV=2    | RAI3_HUMAN   | 40,252.60  | 95.50%  | 1  | 1  | 1  | 9.80%  |
| c(+)-Tiva1 | T-complex protein 1 subunit eta                                                   | OS=Homo sapiens GN=CTCT1 PE=1 SV=2     | TCPH_HUMAN   | 59,367.80  | 100.00% | 2  | 2  | 2  | 6.26%  |
| c(+)-Tiva1 | Erythrocyte band 7 integral membrane protein                                      | OS=Homo sapiens GN=STOM PE=1 SV=3      | STOM_HUMAN   | 31,732.10  | 100.00% | 1  | 1  | 1  | 6.60%  |
| c(+)-Tiva1 | GMP synthase [glutamine-hydrolyzing]                                              | OS=Homo sapiens GN=GMPS PE=1 SV=1      | GUAA_HUMAN   | 76,716.70  | 94.90%  | 1  | 1  | 1  | 3.46%  |
| c(+)-Tiva1 | Keratin, type II cytoskeletal 6A                                                  | OS=Homo sapiens GN=KRT6A PE=1 SV=3     | K2C6A_HUMAN  | 60,046.40  | 100.00% | 2  | 2  | 2  | 6.38%  |
| c(+)-Tiva1 | 14-3-3 protein epsilon                                                            | OS=Homo sapiens GN=YWHAZ PE=1 SV=1     | 1433E_HUMAN  | 29,175.00  | 100.00% | 3  | 3  | 3  | 18.80% |
| c(+)-Tiva1 | X-ray repair cross-complementing protein 5                                        | OS=Homo sapiens GN=XRCC5 PE=1 SV=3     | XRCC5_HUMAN  | 82,707.10  | 100.00% | 4  | 5  | 5  | 10.40% |
| c(+)-Tiva1 | D-3-phosphoglycerate dehydrogenase                                                | OS=Homo sapiens GN=PHGDH PE=1 SV=4     | SERA_HUMAN   | 56,650.60  | 99.90%  | 1  | 1  | 1  | 3.56%  |
| c(+)-Tiva1 | Host cell factor 1                                                                | OS=Homo sapiens GN=HCFC1 PE=1 SV=2     | HCFC1_HUMAN  | 208,724.50 | 99.80%  | 1  | 1  | 1  | 1.33%  |
| c(+)-Tiva1 | Splicing factor 3A subunit 3                                                      | OS=Homo sapiens GN=SF3A3 PE=1 SV=1     | SF3A3_HUMAN  | 58,851.30  | 95.50%  | 1  | 1  | 1  | 6.19%  |
| c(+)-Tiva1 | Cytospin-A                                                                        | OS=Homo sapiens GN=SPECCL1 PE=1 SV=2   | CYTSA_HUMAN  | 124,605.40 | 100.00% | 5  | 5  | 5  | 9.13%  |
| c(+)-Tiva1 | Splicing factor 3A subunit 2                                                      | OS=Homo sapiens GN=SF3A2 PE=1 SV=2     | SF3A2_HUMAN  | 49,254.50  | 95.50%  | 1  | 1  | 1  | 3.66%  |
| c(+)-Tiva1 | Galectin-3                                                                        | OS=Homo sapiens GN=LGALS3 PE=1 SV=5    | LEG3_HUMAN   | 26,152.80  | 87.70%  | 1  | 1  | 1  | 4.40%  |
| c(+)-Tiva1 | DNA damage-binding protein 1                                                      | OS=Homo sapiens GN=DDB1 PE=1 SV=1      | DDB1_HUMAN   | 126,970.20 | 100.00% | 3  | 3  | 3  | 5.96%  |
| c(+)-Tiva1 | Coatamer subunit beta                                                             | OS=Homo sapiens GN=COPB1 PE=1 SV=3     | COPB_HUMAN   | 107,146.00 | 100.00% | 8  | 8  | 8  | 15.00% |
| c(+)-Tiva1 | AP-1 complex subunit beta-1                                                       | OS=Homo sapiens GN=APIB1 PE=1 SV=2     | APIB1_HUMAN  | 104,639.40 | 86.40%  | 1  | 1  | 1  | 1.37%  |
| c(+)-Tiva1 | Pyruvate dehydrogenase E1 component subunit beta, mitochondrial                   | OS=Homo sapiens GN=PDHB PE=1 SV=3      | ODPB_HUMAN   | 39,233.40  | 100.00% | 2  | 2  | 2  | 8.91%  |
| c(+)-Tiva1 | Endoplasmic reticulum resident protein 29                                         | OS=Homo sapiens GN=ERP29 PE=1 SV=4     | ERP29_HUMAN  | 28,994.90  | 100.00% | 2  | 2  | 2  | 11.90% |
| c(+)-Tiva1 | CD59 glycoprotein                                                                 | OS=Homo sapiens GN=CD59 PE=1 SV=1      | CD59_HUMAN   | 14,177.20  | 95.50%  | 1  | 1  | 1  | 9.38%  |
| c(+)-Tiva1 | Superoxide dismutase [Cu-Zn]                                                      | OS=Homo sapiens GN=SOD1 PE=1 SV=2      | SODC_HUMAN   | 15,935.30  | 100.00% | 2  | 2  | 2  | 44.80% |
| c(+)-Tiva1 | Ubiquitin-60S ribosomal protein L40                                               | OS=Homo sapiens GN=UBA52 PE=1 SV=2     | RL40_HUMAN   | 14,728.90  | 100.00% | 3  | 3  | 3  | 29.70% |
| c(+)-Tiva1 | Tropomyosin alpha-1 chain                                                         | OS=Homo sapiens GN=TPM1 PE=1 SV=2      | TPM1_HUMAN   | 32,710.00  | 100.00% | 4  | 4  | 4  | 12.30% |
| c(+)-Tiva1 | Heterogeneous nuclear ribonucleoprotein L                                         | OS=Homo sapiens GN=HNRNPL PE=1 SV=2    | HNRPL_HUMAN  | 64,132.80  | 100.00% | 4  | 4  | 4  | 19.40% |
| c(+)-Tiva1 | AP-2 complex subunit alpha-2                                                      | OS=Homo sapiens GN=AP2A2 PE=1 SV=2     | AP2A2_HUMAN  | 103,962.80 | 95.50%  | 1  | 1  | 1  | 2.98%  |
| c(+)-Tiva1 | Heterogeneous nuclear ribonucleoprotein K                                         | OS=Homo sapiens GN=HNRNPK PE=1 SV=1    | HNRPK_HUMAN  | 50,978.50  | 100.00% | 6  | 7  | 7  | 21.00% |
| c(+)-Tiva1 | 26S protease regulatory subunit 8                                                 | OS=Homo sapiens GN=PSMC5 PE=1 SV=1     | PR58_HUMAN   | 45,627.20  | 99.60%  | 1  | 1  | 1  | 2.71%  |
| c(+)-Tiva1 | Glutathione reductase, mitochondrial                                              | OS=Homo sapiens GN=GSR PE=1 SV=2       | GSHR_HUMAN   | 56,257.40  | 100.00% | 2  | 2  | 2  | 8.62%  |
| c(+)-Tiva1 | Guanine nucleotide-binding protein (G(i)) subunit alpha-1                         | OS=Homo sapiens GN=GNAI1 PE=1 SV=2     | GNAI1_HUMAN  | 40,362.50  | 100.00% | 1  | 1  | 1  | 3.67%  |
| c(+)-Tiva1 | Putative 60S ribosomal protein L13a-like                                          | MGC87657 OS=Homo sapiens PE=5 SV=1     | R13AX_HUMAN  | 12,135.00  | 58.70%  | 1  | 1  | 1  | 10.80% |
| c(+)-Tiva1 | Ribosome-binding protein 1                                                        | OS=Homo sapiens GN=RRBP1 PE=1 SV=4     | RRBP1_HUMAN  | 152,470.60 | 95.50%  | 1  | 1  | 1  | 0.92%  |
| c(+)-Tiva1 | F-actin-capping protein subunit alpha-1                                           | OS=Homo sapiens GN=CAPZA1 PE=1 SV=3    | CAZA1_HUMAN  | 32,923.20  | 100.00% | 4  | 4  | 4  | 31.50% |
| c(+)-Tiva1 | 60S acidic ribosomal protein P0-like                                              | OS=Homo sapiens GN=RLPOP6 PE=5 SV=1    | RLA0L_HUMAN  | 34,365.10  | 99.90%  | 1  | 1  | 1  | 6.94%  |
| c(+)-Tiva1 | Creatine kinase U-type, mitochondrial                                             | OS=Homo sapiens GN=CKMT1A PE=1 SV=1    | KCRU_HUMAN   | 47,038.00  | 100.00% | 3  | 4  | 4  | 17.00% |
| c(+)-Tiva1 | Coronin-1C                                                                        | OS=Homo sapiens GN=COR1C PE=1 SV=1     | CS250_HUMAN  | 53,250.30  | 100.00% | 18 | 24 | 25 | 48.50% |
| c(+)-Tiva1 | Staphylococcal nuclease domain-containing protein 1                               | OS=Homo sapiens GN=SNDI1 PE=1 SV=1     | SNDI1_HUMAN  | 101,998.50 | 100.00% | 3  | 3  | 4  | 7.03%  |
| c(+)-Tiva1 | Pyruvate kinase isozymes M1/M2                                                    | OS=Homo sapiens GN=PKM PE=1 SV=4       | KPYM_HUMAN   | 57,937.50  | 100.00% | 13 | 14 | 14 | 45.00% |
| c(+)-Tiva1 | Probable ATP-dependent RNA helicase DDX17                                         | OS=Homo sapiens GN=DDX17 PE=1 SV=2     | DDX17_HUMAN  | 80,274.00  | 100.00% | 2  | 2  | 2  | 3.57%  |
| c(+)-Tiva1 | DNA replication licensing factor MCM4                                             | OS=Homo sapiens GN=MCM4 PE=1 SV=5      | MCM4_HUMAN   | 96,560.60  | 16.20%  | 0  | 0  | 0  | 0.00%  |
| c(+)-Tiva1 | C-1-tetrahydrofolate synthase, cytoplasmic                                        | OS=Homo sapiens GN=MTHFD1 PE=1 SV=3    | C1TC_HUMAN   | 101,561.50 | 95.50%  | 1  | 1  | 1  | 1.71%  |
| c(+)-Tiva1 | Guanine nucleotide-binding protein (G(i)(S)/G(T)) subunit beta-1                  | OS=Homo sapiens GN=GNB1 PE=1 SV=3      | GBB1_HUMAN   | 37,377.50  | 100.00% | 8  | 8  | 8  | 43.50% |
| c(+)-Tiva1 | LIM domain only protein 7                                                         | OS=Homo sapiens GN=LMO7 PE=1 SV=3      | LMO7_HUMAN   | 192,699.40 | 100.00% | 31 | 33 | 33 | 28.50% |
| c(+)-Tiva1 | Histone H2B type 1-B                                                              | OS=Homo sapiens GN=HIST1H2BB PE=1 SV=2 | H2B1B_HUMAN  | 13,950.80  | 95.50%  | 1  | 1  | 1  | 11.90% |
| c(+)-Tiva1 | Nucleolin                                                                         | OS=Homo sapiens GN=NCL PE=1 SV=3       | NUCL_HUMAN   | 76,615.90  | 100.00% | 14 | 16 | 16 | 21.50% |
| c(+)-Tiva1 | Tubulin-specific chaperone D                                                      | OS=Homo sapiens GN=TBCD PE=1 SV=2      | TBCD_HUMAN   | 132,602.60 | 78.00%  | 1  | 1  | 1  | 1.34%  |
| c(+)-Tiva1 | 5'-nucleotidase                                                                   | OS=Homo sapiens GN=NT5E PE=1 SV=1      | 5NTD_HUMAN   | 63,369.00  | 100.00% | 5  | 5  | 5  | 15.50% |
| c(+)-Tiva1 | Multifunctional protein ADE2                                                      | OS=Homo sapiens GN=PAICS PE=1 SV=3     | PUR6_HUMAN   | 47,080.00  | 95.50%  | 1  | 1  | 1  | 3.53%  |
| c(+)-Tiva1 | Keratin, type II cytoskeletal 7                                                   | OS=Homo sapiens GN=KRT7 PE=1 SV=5      | K2C7_HUMAN   | 51,387.30  | 100.00% | 16 | 21 | 22 | 44.80% |
| c(+)-Tiva1 | Lon protease homolog, mitochondrial                                               | OS=Homo sapiens GN=LNOM1 PE=1 SV=2     | LNOM1_HUMAN  | 106,491.30 | 52.20%  | 1  | 1  | 1  | 3.02%  |
| c(+)-Tiva1 | PDZ and LIM domain protein 1                                                      | OS=Homo sapiens GN=PDILM1 PE=1 SV=4    | PDL1_HUMAN   | 36,071.30  | 94.70%  | 1  | 1  | 1  | 9.42%  |
| c(+)-Tiva1 | Transmembrane 9 superfamily member 4                                              | OS=Homo sapiens GN=TM9SF4 PE=1 SV=2    | TM9S4_HUMAN  | 74,521.30  | 85.50%  | 1  | 1  | 1  | 3.27%  |
| c(+)-Tiva1 | Unconventional myosin-Ib                                                          | OS=Homo sapiens GN=MYO1B PE=1 SV=3     | MYO1B_HUMAN  | 131,990.70 | 100.00% | 24 | 30 | 30 | 28.30% |
| c(+)-Tiva1 | 60S ribosomal protein L3                                                          | OS=Homo sapiens GN=RLP3 PE=1 SV=2      | RL3_HUMAN    | 46,109.50  | 95.50%  | 1  | 1  | 1  | 2.23%  |
| c(+)-Tiva1 | Unconventional myosin-Ia                                                          | OS=Homo sapiens GN=MYO1A PE=1 SV=1     | MYO1A_HUMAN  | 118,404.40 | 99.90%  | 1  | 1  | 1  | 1.63%  |
| c(+)-Tiva1 | DNA-dependent protein kinase catalytic subunit                                    | OS=Homo sapiens GN=PRKDC PE=1 SV=3     | PRKDC_HUMAN  | 469,095.50 | 100.00% | 16 | 16 | 16 | 7.61%  |
| c(+)-Tiva1 | Heat shock 70 kDa protein 4                                                       | OS=Homo sapiens GN=HSPA4 PE=1 SV=4     | HSP74_HUMAN  | 94,331.90  | 73.70%  | 1  | 1  | 1  | 1.79%  |
| c(+)-Tiva1 | 40S ribosomal protein S2                                                          | OS=Homo sapiens GN=RP52 PE=1 SV=2      | RS2_HUMAN    | 31,325.20  | 42.50%  | 0  | 0  | 0  | 0.00%  |
| c(+)-Tiva1 | Isoleucine--tRNA ligase, cytoplasmic                                              | OS=Homo sapiens GN=IARS PE=1 SV=2      | SYIC_HUMAN   | 144,501.80 | 96.70%  | 1  | 1  | 1  | 1.43%  |
| c(+)-Tiva1 | 14-3-3 protein gamma                                                              | OS=Homo sapiens GN=YWHAG PE=1 SV=2     | 1433G_HUMAN  | 28,303.10  | 95.50%  | 1  | 1  | 1  | 5.67%  |
| c(+)-Tiva1 | Sodium/potassium-transporting ATPase subunit alpha-1                              | OS=Homo sapiens GN=ATP1A1 PE=1 SV=1    | AT1A1_HUMAN  | 112,899.50 | 100.00% | 2  | 2  | 2  | 3.23%  |
| c(+)-Tiva1 | Monocarboxylate transporter 1                                                     | OS=Homo sapiens GN=SLC16A1 PE=1 SV=3   | MOT1_HUMAN   | 53,946.00  | 53.20%  | 1  | 1  | 1  | 4.00%  |
| c(+)-Tiva1 | Adenylate kinase 2, mitochondrial                                                 | OS=Homo sapiens GN=AK2 PE=1 SV=2       | KAD2_HUMAN   | 26,479.00  | 100.00% | 2  | 2  | 2  | 12.10% |
| c(+)-Tiva1 | Dipeptidyl peptidase 1                                                            | OS=Homo sapiens GN=CTSC PE=1 SV=2      | CATC_HUMAN   | 51,854.40  | 98.30%  | 1  | 1  | 1  | 4.10%  |
| c(+)-Tiva1 | Protein arginine N-methyltransferase 1                                            | OS=Homo sapiens GN=PRMT1 PE=1 SV=2     | ANM1_HUMAN   | 41,516.10  | 95.50%  | 1  | 1  | 1  | 3.32%  |
| c(+)-Tiva1 | Prostaglandin reductase 1                                                         | OS=Homo sapiens GN=PTGR1 PE=1 SV=2     | PTGR1_HUMAN  | 35,870.50  | 100.00% | 2  | 2  | 2  | 10.60% |
| c(+)-Tiva1 | Heat shock 70 kDa protein 6                                                       | OS=Homo sapiens GN=HSPA6 PE=1 SV=2     | HSP76_HUMAN  | 71,028.80  | 76.90%  | 1  | 2  | 2  | 1.71%  |
| c(+)-Tiva1 | Very long-chain specific acyl-CoA dehydrogenase, mitochondrial                    | OS=Homo sapiens GN=ACADVL PE=1 SV=1    | ACADV_HUMAN  | 70,391.60  | 84.10%  | 1  | 1  | 1  | 3.97%  |
| c(+)-Tiva1 | ADP-ribosylation factor 6                                                         | OS=Homo sapiens GN=ARF6 PE=1 SV=2      | ARF6_HUMAN   | 20,083.00  | 100.00% | 2  | 2  | 2  | 23.40% |
| c(+)-Tiva1 | Basigin                                                                           | OS=Homo sapiens GN=BSG PE=1 SV=2       | BASI_HUMAN   | 42,199.70  | 78.80%  | 1  | 1  | 1  | 2.34%  |
| c(+)-Tiva1 | 26S protease regulatory subunit 6B                                                | OS=Homo sapiens GN=PSMC4 PE=1 SV=2     | PR56B_HUMAN  | 47,367.70  | 100.00% | 2  | 2  | 2  | 12.40% |
| c(+)-Tiva1 | Keratin, type II cytoskeletal 79                                                  | OS=Homo sapiens GN=KRT79 PE=1 SV=2     | K2C79_HUMAN  | 57,836.00  | 92.00%  | 1  | 1  | 1  | 1.87%  |
| c(+)-Tiva1 | Lysosomal alpha-glucosidase                                                       | OS=Homo sapiens GN=GAA PE=1 SV=4       | LYAG_HUMAN   | 105,324.40 | 100.00% | 3  | 3  | 3  | 6.30%  |
| c(+)-Tiva1 | Protein disulfide-isomerase                                                       | OS=Homo sapiens GN=P4HB PE=1 SV=3      | PDI1A1_HUMAN | 57,118.10  | 100.00% | 14 | 15 | 15 | 42.90% |
| c(+)-Tiva1 | Tubulin beta-8 chain                                                              | OS=Homo sapiens GN=TUBB8 PE=1 SV=2     | TBB8_HUMAN   | 49,776.30  | 100.00% | 2  | 2  | 2  | 7.43%  |
| c(+)-Tiva1 | Vacuolar protein sorting-associated protein 35                                    | OS=Homo sapiens GN=VPS35 PE=1 SV=2     | VPS35_HUMAN  | 91,710.00  | 95.40%  | 1  | 1  | 1  | 2.01%  |
| c(+)-Tiva1 | Utrophin                                                                          | OS=Homo sapiens GN=UTRN PE=1 SV=2      | UTRO_HUMAN   | 394,466.40 | 92.80%  | 1  | 1  | 1  | 0.76%  |
| c(+)-Tiva1 | Heterogeneous nuclear ribonucleoprotein M                                         | OS=Homo sapiens GN=HNRNPM PE=1 SV=3    | HNRPM_HUMAN  | 77,517.30  | 100.00% | 3  | 3  | 3  | 6.71%  |
| c(+)-Tiva1 | Glypican-1                                                                        | OS=Homo sapiens GN=GPC1 PE=1 SV=2      | GPC1_HUMAN   | 61,681.30  | 95.50%  | 1  | 1  | 1  | 3.05%  |
| c(+)-Tiva1 | NADP-dependent malic enzyme                                                       | OS=Homo sapiens GN=ME1 PE=1 SV=1       | MAOX_HUMAN   | 64,151.40  | 95.50%  | 1  | 1  | 1  | 3.32%  |

|            |                                                                                |                                       |                           |              |            |         |     |     |     |        |
|------------|--------------------------------------------------------------------------------|---------------------------------------|---------------------------|--------------|------------|---------|-----|-----|-----|--------|
| c(+)-Tiva2 | Eukaryotic translation initiation factor 3 subunit C                           | OS=Homo sapiens GN=EIF3C              | PE=1 SV=1                 | EIF3C_HUMAN  | 105,347.20 | 39.80%  | 0   | 0   | 0   | 0.00%  |
| c(+)-Tiva2 | Unconventional myosin-VI                                                       | OS=Homo sapiens GN=MYO6               | PE=1 SV=4                 | MYO6_HUMAN   | 149,697.10 | 100.00% | 20  | 24  | 25  | 19.90% |
| c(+)-Tiva2 | Prelamin-A/C                                                                   | OS=Homo sapiens GN=LMNA               | PE=1 SV=1                 | LMNA_HUMAN   | 74,140.70  | 100.00% | 21  | 23  | 23  | 40.10% |
| c(+)-Tiva2 | Heterogeneous nuclear ribonucleoprotein A1                                     | OS=Homo sapiens GN=HNRNPA1            | PE=1 SV=5                 | ROA1_HUMAN   | 38,747.00  | 100.00% | 2   | 2   | 2   | 9.14%  |
| c(+)-Tiva2 | RNA-binding protein Raly                                                       | OS=Homo sapiens GN=RALY               | PE=1 SV=1                 | RALY_HUMAN   | 32,463.90  | 100.00% | 2   | 2   | 2   | 6.86%  |
| c(+)-Tiva2 | Heterogeneous nuclear ribonucleoprotein A0                                     | OS=Homo sapiens GN=HNRNPA0            | PE=1 SV=1                 | ROA0_HUMAN   | 30,840.50  | 95.00%  | 1   | 1   | 1   | 6.56%  |
| c(+)-Tiva2 | Procollagen-lysine, 2-oxoglutarate 5-dioxygenase 3                             | OS=Homo sapiens GN=PLOD3              | PE=1 SV=1                 | PLOD3_HUMAN  | 84,786.80  | 51.90%  | 1   | 1   | 1   | 2.17%  |
| c(+)-Tiva2 | Protein transport protein Sec16A                                               | OS=Homo sapiens GN=SEC16A             | PE=1 SV=3                 | SC16A_HUMAN  | 233,515.30 | 95.00%  | 1   | 1   | 1   | 0.69%  |
| c(+)-Tiva2 | Myosin-14                                                                      | OS=Homo sapiens GN=MYH14              | PE=1 SV=2                 | MYH14_HUMAN  | 227,872.60 | 100.00% | 48  | 56  | 58  | 30.20% |
| c(+)-Tiva2 | A-kinase anchor protein 2                                                      | OS=Homo sapiens GN=AKAP2              | PE=1 SV=3                 | AKAP2_HUMAN  | 94,660.90  | 100.00% | 6   | 6   | 6   | 13.50% |
| c(+)-Tiva2 | 60S ribosomal protein L3                                                       | OS=Homo sapiens GN=RPL3               | PE=1 SV=2                 | RL3_HUMAN    | 46,109.50  | 90.60%  | 1   | 1   | 1   | 6.45%  |
| c(+)-Tiva2 | Tubulin alpha-4A chain                                                         | OS=Homo sapiens GN=TUBAA4             | PE=1 SV=1                 | TBA4A_HUMAN  | 49,924.60  | 99.40%  | 1   | 1   | 1   | 4.46%  |
| c(+)-Tiva2 | Glutamate dehydrogenase 1, mitochondrial                                       | OS=Homo sapiens GN=GLUD1              | PE=1 SV=2                 | DHE3_HUMAN   | 61,399.70  | 100.00% | 12  | 13  | 14  | 29.90% |
| c(+)-Tiva2 | Caveolin-1                                                                     | OS=Homo sapiens GN=CAV1               | PE=1 SV=4                 | CAV1_HUMAN   | 20,472.20  | 100.00% | 5   | 5   | 5   | 35.40% |
| c(+)-Tiva2 | Early endosome antigen 1                                                       | OS=Homo sapiens GN=EEA1               | PE=1 SV=2                 | EEA1_HUMAN   | 162,468.10 | 100.00% | 2   | 2   | 2   | 2.06%  |
| c(+)-Tiva2 | Coiled-coil domain-containing protein 91                                       | OS=Homo sapiens GN=CCDC91             | PE=1 SV=2                 | CCD91_HUMAN  | 49,971.80  | 14.10%  | 0   | 0   | 0   | 0.00%  |
| c(+)-Tiva2 | Myosin regulatory light chain 12A                                              | OS=Homo sapiens GN=MYL12A             | PE=1 SV=2                 | ML12A_HUMAN  | 19,795.30  | 100.00% | 5   | 7   | 7   | 39.80% |
| c(+)-Tiva2 | Kinectin                                                                       | OS=Homo sapiens GN=KTN1               | PE=1 SV=1                 | KTN1_HUMAN   | 156,276.30 | 100.00% | 8   | 8   | 8   | 7.59%  |
| c(+)-Tiva2 | LIM domain and actin-binding protein 1                                         | OS=Homo sapiens GN=LIMA1              | PE=1 SV=1                 | LIMA1_HUMAN  | 85,226.30  | 100.00% | 37  | 45  | 51  | 50.20% |
| c(+)-Tiva2 | Voltage-dependent anion-selective channel protein 2                            | OS=Homo sapiens GN=VDAC2              | PE=1 SV=2                 | VDAC2_HUMAN  | 31,567.30  | 99.90%  | 2   | 2   | 2   | 11.60% |
| c(+)-Tiva2 | Actin-related protein 3                                                        | OS=Homo sapiens GN=ACTR3              | PE=1 SV=3                 | ARP3_HUMAN   | 47,371.90  | 100.00% | 8   | 9   | 9   | 28.50% |
| c(+)-Tiva2 | Junction plakoglobin                                                           | OS=Homo sapiens GN=JUP                | PE=1 SV=3                 | PLAK_HUMAN   | 81,745.90  | 100.00% | 3   | 3   | 3   | 5.91%  |
| c(+)-Tiva2 | Keratin, type II cytoskeletal 8                                                | OS=Homo sapiens GN=KRT8               | PE=1 SV=7                 | K2C8_HUMAN   | 53,706.20  | 100.00% | 21  | 26  | 26  | 43.30% |
| c(+)-Tiva2 | E3 SUMO-protein ligase RanBP2                                                  | OS=Homo sapiens GN=RANBP2             | PE=1 SV=2                 | RBP2_HUMAN   | 358,198.20 | 100.00% | 8   | 8   | 8   | 3.54%  |
| c(+)-Tiva2 | 40S ribosomal protein S4, X isoform                                            | OS=Homo sapiens GN=RP54X              | PE=1 SV=2                 | RS4X_HUMAN   | 29,599.30  | 100.00% | 1   | 1   | 1   | 3.42%  |
| c(+)-Tiva2 | Keratin, type I cytoskeletal 19                                                | OS=Homo sapiens GN=KRT19              | PE=1 SV=4                 | K1C19_HUMAN  | 44,107.10  | 100.00% | 18  | 22  | 23  | 48.20% |
| c(+)-Tiva2 | Serine/arginine-rich splicing factor 7                                         | OS=Homo sapiens GN=SRSF7              | PE=1 SV=1                 | SRSF7_HUMAN  | 27,367.50  | 52.00%  | 1   | 1   | 1   | 8.82%  |
| c(+)-Tiva2 | Unconventional myosin-1c                                                       | OS=Homo sapiens GN=MYO1C              | PE=1 SV=4                 | MYO1C_HUMAN  | 121,684.90 | 100.00% | 29  | 32  | 33  | 30.40% |
| c(+)-Tiva2 | Coatamer subunit beta'                                                         | OS=Homo sapiens GN=COPB2              | PE=1 SV=2                 | COPB2_HUMAN  | 102,489.10 | 100.00% | 2   | 2   | 2   | 3.20%  |
| c(+)-Tiva2 | Gelsolin                                                                       | OS=Homo sapiens GN=GSN                | PE=1 SV=1                 | GELS_HUMAN   | 85,697.80  | 100.00% | 5   | 7   | 7   | 12.50% |
| c(+)-Tiva2 | Pyruvate dehydrogenase E1 component subunit alpha, somatic form, mitochondrial | OS=Homo sapiens GN=PDHA1              | PE=1 SV=1                 | ODPA_HUMAN   | 43,296.50  | 100.00% | 6   | 6   | 6   | 22.10% |
| c(+)-Tiva2 | 40S ribosomal protein S3                                                       | OS=Homo sapiens GN=RP53               | PE=1 SV=2                 | RS3_HUMAN    | 26,688.60  | 100.00% | 5   | 5   | 5   | 24.30% |
| c(+)-Tiva2 | Transmembrane emp24 domain-containing protein 4                                | OS=Homo sapiens GN=TMED4              | PE=1 SV=1                 | TMED4_HUMAN  | 25,943.10  | 74.70%  | 1   | 1   | 1   | 7.49%  |
| c(+)-Tiva2 | 60S ribosomal protein L27a                                                     | OS=Homo sapiens GN=RPL27A             | PE=1 SV=2                 | RL27A_HUMAN  | 16,561.40  | 13.00%  | 0   | 0   | 0   | 0.00%  |
| c(+)-Tiva2 | Actin-related protein 2/3 complex subunit 3                                    | OS=Homo sapiens GN=ARPC3              | PE=1 SV=3                 | ARPC3_HUMAN  | 20,547.80  | 95.00%  | 1   | 1   | 1   | 8.99%  |
| c(+)-Tiva2 | RuvB-like 2                                                                    | OS=Homo sapiens GN=RUVBL2             | PE=1 SV=3                 | RUVB2_HUMAN  | 51,158.10  | 100.00% | 4   | 4   | 4   | 12.50% |
| c(+)-Tiva2 | Absent in melanoma 1 protein                                                   | OS=Homo sapiens GN=AIM1               | PE=1 SV=3                 | AIM1_HUMAN   | 188,677.20 | 95.00%  | 1   | 1   | 1   | 0.70%  |
| c(+)-Tiva2 | Pre-mRNA-processing factor 40 homolog A                                        | OS=Homo sapiens GN=PRPF40A            | PE=1 SV=2                 | PR40A_HUMAN  | 108,807.30 | 100.00% | 2   | 2   | 2   | 2.61%  |
| c(+)-Tiva2 | Villin-like protein                                                            | OS=Homo sapiens GN=VILL               | PE=2 SV=3                 | VILL_HUMAN   | 95,907.80  | 100.00% | 6   | 6   | 7   | 11.40% |
| c(+)-Tiva2 | Golgin subfamily B member 1                                                    | OS=Homo sapiens GN=GOLGB1             | PE=1 SV=2                 | G0GB1_HUMAN  | 376,017.80 | 100.00% | 18  | 18  | 18  | 8.87%  |
| c(+)-Tiva2 | Exportin-1                                                                     | OS=Homo sapiens GN=XPO1               | PE=1 SV=1                 | XPO1_HUMAN   | 123,388.90 | 100.00% | 3   | 3   | 3   | 4.39%  |
| c(+)-Tiva2 | Tropomyosin alpha-4 chain                                                      | OS=Homo sapiens GN=TPM4               | PE=1 SV=3                 | TPM4_HUMAN   | 28,522.40  | 9.40%   | 0   | 0   | 0   | 0.00%  |
| c(+)-Tiva2 | Erlin-1                                                                        | OS=Homo sapiens GN=ERLIN1             | PE=1 SV=1                 | ERLN1_HUMAN  | 38,926.70  | 99.90%  | 1   | 1   | 1   | 3.47%  |
| c(+)-Tiva2 | DnaJ homolog subfamily A member 1                                              | OS=Homo sapiens GN=DNAJA1             | PE=1 SV=2                 | DNJA1_HUMAN  | 44,868.60  | 78.00%  | 1   | 1   | 1   | 3.27%  |
| c(+)-Tiva2 | Tropomyosin alpha-3 chain                                                      | OS=Homo sapiens GN=TPM3               | PE=1 SV=1                 | TPM3_HUMAN   | 32,820.20  | 100.00% | 3   | 3   | 3   | 15.50% |
| c(+)-Tiva2 | Cell division cycle and apoptosis regulator protein 1                          | OS=Homo sapiens GN=CCAR1              | PE=1 SV=2                 | CCAR1_HUMAN  | 132,823.70 | 91.70%  | 1   | 1   | 1   | 2.00%  |
| c(+)-Tiva2 | 40S ribosomal protein S14                                                      | OS=Homo sapiens GN=RP514              | PE=1 SV=3                 | RS14_HUMAN   | 16,272.90  | 99.90%  | 1   | 1   | 1   | 8.61%  |
| c(+)-Tiva2 | WD repeat-containing protein 1                                                 | OS=Homo sapiens GN=WDR1               | PE=1 SV=4                 | WDR1_HUMAN   | 66,193.20  | 100.00% | 2   | 2   | 2   | 4.62%  |
| c(+)-Tiva2 | Histone deacetylase 10                                                         | OS=Homo sapiens GN=HDAC10             | PE=1 SV=1                 | HDA10_HUMAN  | 71,444.80  | 100.00% | 2   | 2   | 2   | 5.83%  |
| c(+)-Tiva2 | Tubulin beta-4B chain                                                          | OS=Homo sapiens GN=TUBB4B             | PE=1 SV=1                 | TBB4B_HUMAN  | 49,830.70  | 95.00%  | 1   | 1   | 1   | 2.70%  |
| c(+)-Tiva2 | Heterogeneous nuclear ribonucleoprotein A3                                     | OS=Homo sapiens GN=HNRNPA3            | PE=1 SV=2                 | ROA3_HUMAN   | 39,595.10  | 100.00% | 9   | 10  | 10  | 26.70% |
| c(+)-Tiva2 | AP-2 complex subunit beta                                                      | OS=Homo sapiens GN=AP2B1              | PE=1 SV=1                 | AP2B1_HUMAN  | 104,555.30 | 68.00%  | 1   | 1   | 1   | 1.17%  |
| c(+)-Tiva2 | Splicing factor U2AF 65 kDa subunit                                            | OS=Homo sapiens GN=U2AF2              | PE=1 SV=4                 | U2AF2_HUMAN  | 53,501.20  | 100.00% | 2   | 2   | 2   | 8.42%  |
| c(+)-Tiva2 | Prostaglandin H synthase 2                                                     | OS=Homo sapiens GN=PTGES2             | PE=1 SV=1                 | PGES2_HUMAN  | 41,943.60  | 11.50%  | 0   | 0   | 0   | 0.00%  |
| c(+)-Tiva2 | Heterogeneous nuclear ribonucleoproteins A2/B1                                 | OS=Homo sapiens GN=HNRNPA2B1          | PE=1 SV=2                 | ROA2_HUMAN   | 37,430.30  | 100.00% | 11  | 14  | 16  | 45.90% |
| c(+)-Tiva2 | Splicing factor U2AF 35 kDa subunit                                            | OS=Homo sapiens GN=U2AF1              | PE=1 SV=3                 | U2AF1_HUMAN  | 27,872.20  | 17.00%  | 0   | 0   | 0   | 0.00%  |
| c(+)-Tiva2 | Prolyl 4-hydroxylase subunit alpha-1                                           | OS=Homo sapiens GN=P4HA1              | PE=1 SV=2                 | P4HA1_HUMAN  | 61,051.60  | 79.20%  | 1   | 1   | 1   | 2.62%  |
| c(+)-Tiva2 | Sarcoplasmic/endoplasmic reticulum calcium ATPase 1                            | OS=Homo sapiens GN=ATP2A1             | PE=1 SV=1                 | AT2A1_HUMAN  | 110,254.90 | 95.00%  | 1   | 1   | 1   | 1.50%  |
| c(+)-Tiva2 | Epithelial cell adhesion molecule                                              | OS=Homo sapiens GN=EPCAM              | PE=1 SV=2                 | EPCAM_HUMAN  | 34,932.30  | 95.00%  | 1   | 1   | 1   | 5.10%  |
| c(+)-Tiva2 | Alpha-actinin-1                                                                | OS=Homo sapiens GN=ACTN1              | PE=1 SV=2                 | ACTN1_HUMAN  | 103,061.10 | 100.00% | 9   | 9   | 9   | 12.10% |
| c(+)-Tiva2 | Actin-related protein 2                                                        | OS=Homo sapiens GN=ACTR2              | PE=1 SV=1                 | ARP2_HUMAN   | 44,761.70  | 100.00% | 5   | 5   | 5   | 14.50% |
| c(+)-Tiva2 | T-complex protein 1 subunit theta                                              | OS=Homo sapiens GN=CCT8               | PE=1 SV=4                 | TCPQ_HUMAN   | 59,621.00  | 86.60%  | 1   | 1   | 1   | 1.82%  |
| c(+)-Tiva2 | THO complex subunit 2                                                          | OS=Homo sapiens GN=THOC2              | PE=1 SV=2                 | THOC2_HUMAN  | 182,780.40 | 100.00% | 2   | 2   | 2   | 1.82%  |
| c(+)-Tiva2 | Protein flightless-1 homolog                                                   | OS=Homo sapiens GN=FLII               | PE=1 SV=2                 | FUII_HUMAN   | 144,755.40 | 100.00% | 15  | 15  | 16  | 17.10% |
| c(+)-Tiva2 | Periplakin                                                                     | OS=Homo sapiens GN=PPL                | PE=1 SV=4                 | PEPL_HUMAN   | 204,747.20 | 100.00% | 35  | 36  | 36  | 27.80% |
| c(+)-Tiva2 | Actin-like protein 6A                                                          | OS=Homo sapiens GN=ACTL6A             | PE=1 SV=1                 | ACL6A_HUMAN  | 47,461.10  | 95.00%  | 1   | 1   | 1   | 3.03%  |
| c(+)-Tiva2 | Fragile X mental retardation syndrome-related protein 1                        | OS=Homo sapiens GN=FXR1               | PE=1 SV=3                 | FXR1_HUMAN   | 69,720.90  | 22.00%  | 0   | 0   | 0   | 0.00%  |
| c(+)-Tiva2 | 28S ribosomal protein S9, mitochondrial                                        | OS=Homo sapiens GN=MRPS9              | PE=1 SV=2                 | RT09_HUMAN   | 45,836.00  | 99.90%  | 1   | 1   | 1   | 2.78%  |
| c(+)-Tiva2 | Heterogeneous nuclear ribonucleoprotein U-like                                 | protein 1 OS=Homo sapiens GN=HNRNPUL1 | PE=1 SV=2                 | HNRL1_HUMAN  | 95,739.70  | 100.00% | 2   | 2   | 2   | 3.97%  |
| c(+)-Tiva2 | Tubulin beta chain                                                             | OS=Homo sapiens GN=TUBB               | PE=1 SV=2                 | TBB5_HUMAN   | 49,670.60  | 99.90%  | 1   | 1   | 1   | 3.38%  |
| c(+)-Tiva2 | Putative pre-mRNA-splicing factor ATP-dependent RNA helicase DHX15             | OS=Homo sapiens GN=DXH15              | PE=1 SV=2                 | DXH15_HUMAN  | 90,935.20  | 100.00% | 2   | 2   | 2   | 2.64%  |
| c(+)-Tiva2 | Nucleolar RNA helicase 2                                                       | OS=Homo sapiens GN=DDX21              | PE=1 SV=5                 | DDX21_HUMAN  | 87,346.00  | 99.70%  | 1   | 1   | 1   | 1.92%  |
| c(+)-Tiva2 | Unconventional myosin-1e                                                       | OS=Homo sapiens GN=MYO1E              | PE=1 SV=2                 | MYO1E_HUMAN  | 127,066.30 | 99.90%  | 1   | 1   | 1   | 1.08%  |
| c(+)-Tiva2 | ATP synthase subunit alpha, mitochondrial                                      | OS=Homo sapiens GN=ATP5A1             | PE=1 SV=1                 | ATPA_HUMAN   | 59,752.10  | 100.00% | 7   | 7   | 7   | 15.40% |
| c(+)-Tiva2 | ELAV-like protein 1                                                            | OS=Homo sapiens GN=ELAVL1             | PE=1 SV=2                 | ELAV1_HUMAN  | 36,092.60  | 100.00% | 5   | 5   | 5   | 21.80% |
| c(+)-Tiva2 | Ras GTPase-activating-like protein IQGAP1                                      | OS=Homo sapiens GN=IQGAP1             | PE=1 SV=1                 | IQGA1_HUMAN  | 189,258.60 | 100.00% | 27  | 29  | 30  | 23.40% |
| c(+)-Tiva2 | Band 4.1-like protein 1                                                        | OS=Homo sapiens GN=EPB41L1            | PE=1 SV=2                 | E41L1_HUMAN  | 98,505.30  | 5.40%   | 0   | 0   | 0   | 0.00%  |
| c(+)-Tiva2 | Sperm-specific antigen 2                                                       | OS=Homo sapiens GN=SSFA2              | PE=1 SV=3                 | SSFA2_HUMAN  | 138,386.10 | 100.00% | 6   | 6   | 7   | 7.23%  |
| c(+)-Tiva2 | 40S ribosomal protein S5                                                       | OS=Homo sapiens GN=RP55               | PE=1 SV=4                 | RS5_HUMAN    | 22,777.00  | 95.00%  | 1   | 1   | 1   | 7.35%  |
| c(+)-Tiva2 | Actin-related protein 2/3 complex subunit 4                                    | OS=Homo sapiens GN=ARPC4              | PE=1 SV=3                 | ARPC4_HUMAN  | 19,667.40  | 100.00% | 3   | 3   | 3   | 17.90% |
| c(+)-Tiva2 | 40S ribosomal protein SA                                                       | OS=Homo sapiens GN=RP5A               | PE=1 SV=4                 | RSA_HUMAN    | 32,854.10  | 100.00% | 5   | 5   | 5   | 25.80% |
| c(+)-Tiva2 | U5 small nuclear ribonucleoprotein 200 kDa helicase                            | OS=Homo sapiens GN=SNRNP200           | PE=1 SV=2                 | US20_HUMAN   | 244,513.80 | 100.00% | 14  | 14  | 16  | 9.04%  |
| c(+)-Tiva2 | Putative ribosomal RNA methyltransferase NOP2                                  | OS=Homo sapiens GN=NOP2               | PE=1 SV=2                 | NOP2_HUMAN   | 89,303.60  | 100.00% | 2   | 2   | 2   | 3.57%  |
| c(+)-Tiva2 | Myosin phosphatase Rho-interacting protein                                     | OS=Homo sapiens GN=MPRIIP             | PE=1 SV=3                 | MPRIIP_HUMAN | 116,535.50 | 100.00% | 5   | 5   | 5   | 7.41%  |
| c(+)-Tiva2 | Guanine nucleotide-binding protein subunit beta-2-like 1                       | OS=Homo sapiens GN=GNB2L1             | PE=1 SV=3                 | GBLP_HUMAN   | 35,077.00  | 100.00% | 7   | 7   | 7   | 29.30% |
| c(+)-Tiva2 | Heterogeneous nuclear ribonucleoprotein Q                                      | OS=Homo sapiens GN=SYNCRIP            | PE=1 SV=2                 | HNRPQ_HUMAN  | 69,603.50  | 100.00% | 11  | 13  | 13  | 30.80% |
| c(+)-Tiva2 | Exportin-2                                                                     | OS=Homo sapiens GN=CSE1L              | PE=1 SV=3                 | XPO2_HUMAN   | 110,421.90 | 100.00% | 3   | 3   | 3   | 4.63%  |
| c(+)-Tiva2 | 40S ribosomal protein S16                                                      | OS=Homo sapiens GN=RP516              | PE=1 SV=2                 | RS16_HUMAN   | 16,445.90  | 32.50%  | 0   | 0   | 0   | 0.00%  |
| c(+)-Tiva2 | Clathrin heavy chain 1                                                         | OS=Homo sapiens GN=CLTC               | PE=1 SV=5                 | CLH1_HUMAN   | 191,618.90 | 100.00% | 42  | 52  | 56  | 32.10% |
| c(+)-Tiva2 | Keratin, type I cytoskeletal 10                                                | OS=Homo sapiens GN=KRT10              | PE=1 SV=6                 | K1C10_HUMAN  | 58,828.80  | 100.00% | 11  | 11  | 11  | 20.70% |
| c(+)-Tiva2 | Guanine nucleotide-binding protein G(k) subunit alpha                          | OS=Homo sapiens GN=GNAI3              | PE=1 SV=3                 | GNAI3_HUMAN  | 40,533.50  | 100.00% | 2   | 2   | 2   | 8.19%  |
| c(+)-Tiva2 | Structural maintenance of chromosomes protein 3                                | OS=Homo sapiens GN=SMC3               | PE=1 SV=2                 | SMC3_HUMAN   | 141,547.10 | 100.00% | 2   | 2   | 2   | 2.14%  |
| c(+)-Tiva2 | ADP/ATP translocase 2                                                          | OS=Homo sapiens GN=SLC25A5            | PE=1 SV=7                 | ADT2_HUMAN   | 32,853.50  | 100.00% | 2   | 2   | 2   | 8.05%  |
| c(+)-Tiva2 | Sarcoplasmic/endoplasmic reticulum calcium ATPase 2                            | OS=Homo sapiens GN=ATP2A2             | PE=1 SV=1                 | AT2A2_HUMAN  | 114,758.80 | 100.00% | 2   | 2   | 2   | 2.69%  |
| c(+)-Tiva2 | 60S ribosomal protein L6                                                       | OS=Homo sapiens GN=RPL6               | PE=1 SV=3                 | RL6_HUMAN    | 32,729.30  | 95.00%  | 1   | 1   | 1   | 6.94%  |
| c(+)-Tiva2 | Protein NipSnap homolog 1                                                      | OS=Homo sapiens GN=NIPSNAP1           | PE=1 SV=1                 | NIP51_HUMAN  | 33,310.90  | 100.00% | 2   | 2   | 2   | 8.10%  |
| c(+)-Tiva2 | Nuclear pore complex protein Nup85                                             | OS=Homo sapiens GN=NUP85              | PE=1 SV=1                 | NUP85_HUMAN  | 75,022.60  | 100.00% | 1   | 1   | 1   | 3.96%  |
| c(+)-Tiva2 | 60S ribosomal protein L5                                                       | OS=Homo sapiens GN=RP5L               | PE=1 SV=3                 | RL5_HUMAN    | 34,363.50  | 100.00% | 3   | 3   | 3   | 12.10% |
| c(+)-Tiva2 | Putative heat shock protein HSP 90-beta-3                                      | OS=Homo sapiens GN=HSP90AB3P          | PE=5 SV=1                 | H90B3_HUMAN  | 68,326.50  | 100.00% | 2   | 2   | 2   | 4.52%  |
| c(+)-Tiva2 | sp [Q13813] SPTA2_HUMAN                                                        | Spectrin alpha chain, brain           | OS=Homo sapiens GN=SPTAN1 | PE           | 0          | 100.00% | 183 | 256 | 277 | 0.00%  |
| c(+)-Tiva2 | Beta-actin-like protein 2                                                      | OS=Homo sapiens GN=ACTBL2             | PE=1 SV=2                 | ACTBL_HUMAN  | 42,004.20  | 100.00% | 3   | 3   | 3   | 11.20% |
| c(+)-Tiva2 | Putative heat shock protein HSP 90-beta-2                                      | OS=Homo sapiens GN=HSP90AB2P          | PE=1 SV=2                 | H90B2_HUMAN  | 44,350.20  | 57.70%  | 1   | 1   | 1   | 2.36%  |
| c(+)-Tiva2 | Tubulin beta-2A chain                                                          | OS=Homo sapiens GN=TUBB2A             | PE=1 SV=1                 | TBB2A_HUMAN  | 49,907.10  | 100.00% | 6   | 7   | 8   | 19.10% |
| c(+)-Tiva2 | Pleckstrin homology domain-containing family G member 3                        | OS=Homo sapiens GN=PLEKHG3            | PE=1 SV=1                 | PKHG3_HUMAN  | 134,413.00 | 100.00% |     |     |     |        |

|            |                                                                                                                           |              |            |         |     |     |     |        |
|------------|---------------------------------------------------------------------------------------------------------------------------|--------------|------------|---------|-----|-----|-----|--------|
| c(+)-Tiva2 | Eukaryotic translation initiation factor 3 subunit L OS=Homo sapiens GN=EIF3L PE=1 SV=1                                   | EIF3L_HUMAN  | 66,729.30  | 100.00% | 2   | 2   | 2   | 5.14%  |
| c(+)-Tiva2 | Mucin-1 OS=Homo sapiens GN=MUC1 PE=1 SV=3                                                                                 | MUC1_HUMAN   | 122,098.60 | 95.00%  | 1   | 1   | 1   | 0.88%  |
| c(+)-Tiva2 | Ig kappa chain C region OS=Homo sapiens GN=IGKC PE=1 SV=1                                                                 | IGKC_HUMAN   | 11,608.60  | 95.00%  | 1   | 1   | 1   | 13.20% |
| c(+)-Tiva2 | Catenin beta-1 OS=Homo sapiens GN=CTNNB1 PE=1 SV=1                                                                        | CTNB1_HUMAN  | 85,497.00  | 100.00% | 3   | 3   | 3   | 5.25%  |
| c(+)-Tiva2 | Heat shock protein HSP 90-alpha OS=Homo sapiens GN=HSP90AA1 PE=1 SV=5                                                     | HS90A_HUMAN  | 84,663.20  | 100.00% | 2   | 2   | 2   | 3.96%  |
| c(+)-Tiva2 | Interleukin enhancer-binding factor 2 OS=Homo sapiens GN=ILF2 PE=1 SV=2                                                   | ILF2_HUMAN   | 43,062.70  | 100.00% | 4   | 5   | 5   | 14.40% |
| c(+)-Tiva2 | Neutral alpha-glucosidase AB OS=Homo sapiens GN=GANAB PE=1 SV=3                                                           | GANAB_HUMAN  | 106,875.90 | 95.80%  | 1   | 1   | 1   | 1.80%  |
| c(+)-Tiva2 | Pericentriolar material 1 protein OS=Homo sapiens GN=PCM1 PE=1 SV=4                                                       | PCM1_HUMAN   | 228,531.50 | 100.00% | 3   | 3   | 5   | 2.37%  |
| c(+)-Tiva2 | Probable 2-oxoglutarate dehydrogenase E1 component DHTKD1, mitochondrial OS=Homo sapiens GN=DHTKD1 PE=2 SV=2              | DHTK1_HUMAN  | 103,078.40 | 84.00%  | 1   | 1   | 1   | 1.96%  |
| c(+)-Tiva2 | Agrin OS=Homo sapiens GN=AGRN PE=1 SV=5                                                                                   | AGRN_HUMAN   | 217,224.80 | 100.00% | 4   | 4   | 4   | 1.74%  |
| c(+)-Tiva2 | Tumor-associated calcium signal transducer 2 OS=Homo sapiens GN=TACSTD2 PE=1 SV=3                                         | TACD2_HUMAN  | 35,709.80  | 100.00% | 1   | 1   | 1   | 4.95%  |
| c(+)-Tiva2 | OTU domain-containing protein 5 OS=Homo sapiens GN=OTUD5 PE=1 SV=1                                                        | OTUD5_HUMAN  | 60,624.80  | 58.10%  | 1   | 1   | 1   | 1.40%  |
| c(+)-Tiva2 | Aspartyl/asparaginyl beta-hydroxylase OS=Homo sapiens GN=ASPH PE=1 SV=3                                                   | ASPH_HUMAN   | 85,862.60  | 100.00% | 6   | 6   | 6   | 12.80% |
| c(+)-Tiva2 | Splicing factor 3B subunit 1 OS=Homo sapiens GN=SF3B1 PE=1 SV=3                                                           | SF3B1_HUMAN  | 145,835.30 | 100.00% | 8   | 9   | 9   | 7.82%  |
| c(+)-Tiva2 | Heterogeneous nuclear ribonucleoprotein R OS=Homo sapiens GN=HNRNPR PE=1 SV=1                                             | HNRPR_HUMAN  | 70,943.90  | 100.00% | 4   | 4   | 4   | 7.58%  |
| c(+)-Tiva2 | Sequestosome-1 OS=Homo sapiens GN=SQSTM1 PE=1 SV=1                                                                        | SQSTM_HUMAN  | 47,687.40  | 100.00% | 3   | 3   | 3   | 12.70% |
| c(+)-Tiva2 | Ankyrin-3 OS=Homo sapiens GN=ANK3 PE=1 SV=3                                                                               | ANK3_HUMAN   | 480,407.20 | 98.80%  | 1   | 1   | 1   | 0.30%  |
| c(+)-Tiva2 | PH domain leucine-rich repeat-containing protein phosphatase 1 OS=Homo sapiens GN=PHLPP1 PE=1 SV=3                        | PHLP1_HUMAN  | 184,673.60 | 57.20%  | 1   | 1   | 1   | 0.82%  |
| c(+)-Tiva2 | Vimentin OS=Homo sapiens GN=VIM PE=1 SV=4                                                                                 | VIME_HUMAN   | 53,652.70  | 95.00%  | 1   | 1   | 1   | 4.08%  |
| c(+)-Tiva2 | Actin-related protein 2/3 complex subunit 5-like protein OS=Homo sapiens GN=ARPC5L PE=1 SV=1                              | ARPSL_HUMAN  | 16,941.30  | 88.00%  | 1   | 1   | 1   | 8.50%  |
| c(+)-Tiva2 | Actin-actinin-4 OS=Homo sapiens GN=ACTN4 PE=1 SV=2                                                                        | ACTN4_HUMAN  | 180,857.20 | 100.00% | 19  | 19  | 19  | 31.00% |
| c(+)-Tiva2 | Nesprin-2 OS=Homo sapiens GN=SYNE2 PE=1 SV=3                                                                              | SYNE2_HUMAN  | 796,453.70 | 100.00% | 19  | 19  | 19  | 4.21%  |
| c(+)-Tiva2 | 60S ribosomal protein L7 OS=Homo sapiens GN=RPL7 PE=1 SV=1                                                                | RL7_HUMAN    | 29,227.70  | 100.00% | 2   | 2   | 2   | 10.10% |
| c(+)-Tiva2 | Insulin-like growth factor 2 mRNA-binding protein 2 OS=Homo sapiens GN=IGF2BP2 PE=1 SV=2                                  | IF2B2_HUMAN  | 66,122.40  | 100.00% | 3   | 3   | 3   | 6.84%  |
| c(+)-Tiva2 | Mammalian endopymidin-related protein 1 OS=Homo sapiens GN=EPDR1 PE=1 SV=2                                                | EPDR1_HUMAN  | 25,437.50  | 100.00% | 2   | 2   | 2   | 9.82%  |
| c(+)-Tiva2 | UDP-glucose:glycoprotein glucosyltransferase 1 OS=Homo sapiens GN=UGGT1 PE=1 SV=3                                         | UGGG1_HUMAN  | 177,195.00 | 12.00%  | 0   | 0   | 0   | 0.00%  |
| c(+)-Tiva2 | Elongation factor 1-alpha 1 OS=Homo sapiens GN=EEF1A1 PE=1 SV=1                                                           | EF1A1_HUMAN  | 50,141.20  | 100.00% | 3   | 3   | 3   | 10.20% |
| c(+)-Tiva2 | Leucine-rich repeat-containing protein 1 OS=Homo sapiens GN=LRRC1 PE=1 SV=1                                               | LRRC1_HUMAN  | 59,244.10  | 58.40%  | 1   | 1   | 1   | 2.48%  |
| c(+)-Tiva2 | Small nuclear ribonucleoprotein Sm D3 OS=Homo sapiens GN=SNRPD3 PE=1 SV=1                                                 | SMD3_HUMAN   | 13,916.60  | 95.00%  | 1   | 1   | 1   | 7.94%  |
| c(+)-Tiva2 | Fascin OS=Homo sapiens GN=FSCN1 PE=1 SV=3                                                                                 | FSCN1_HUMAN  | 54,530.30  | 100.00% | 6   | 6   | 6   | 24.30% |
| c(+)-Tiva2 | ATPase family AAA domain-containing protein 3A OS=Homo sapiens GN=ATAD3A PE=1 SV=2                                        | ATD3A_HUMAN  | 71,370.20  | 100.00% | 1   | 1   | 1   | 3.15%  |
| c(+)-Tiva2 | Ras-related protein Rab-10 OS=Homo sapiens GN=RAB10 PE=1 SV=1                                                             | RAB10_HUMAN  | 22,542.10  | 87.60%  | 1   | 1   | 1   | 5.50%  |
| c(+)-Tiva2 | Putative beta-actin-like protein 3 OS=Homo sapiens GN=POTEKP PE=5 SV=1                                                    | ACTBM_HUMAN  | 42,017.20  | 100.00% | 1   | 2   | 2   | 2.93%  |
| c(+)-Tiva2 | Klotho OS=Homo sapiens GN=KL PE=1 SV=2                                                                                    | KLOT_HUMAN   | 116,185.60 | 96.60%  | 1   | 1   | 1   | 2.17%  |
| c(+)-Tiva2 | Coronin-2A OS=Homo sapiens GN=CORO2A PE=2 SV=2                                                                            | COR2A_HUMAN  | 59,764.70  | 100.00% | 8   | 9   | 9   | 17.90% |
| c(+)-Tiva2 | Dihydrolipoyl dehydrogenase, mitochondrial OS=Homo sapiens GN=DLD PE=1 SV=2                                               | DLDH_HUMAN   | 54,177.50  | 100.00% | 2   | 2   | 2   | 4.72%  |
| c(+)-Tiva2 | Transportin-1 OS=Homo sapiens GN=TNPO1 PE=1 SV=2                                                                          | TNPO1_HUMAN  | 102,358.80 | 99.70%  | 1   | 1   | 1   | 1.34%  |
| c(+)-Tiva2 | Transcription intermediary factor 1-beta OS=Homo sapiens GN=TRIM28 PE=1 SV=5                                              | TIF1B_HUMAN  | 88,549.00  | 100.00% | 1   | 1   | 1   | 1.08%  |
| c(+)-Tiva2 | Coproporphyrinogen-III oxidase, mitochondrial OS=Homo sapiens GN=CPOX PE=1 SV=3                                           | HEM6_HUMAN   | 50,152.00  | 11.30%  | 0   | 0   | 0   | 0.00%  |
| c(+)-Tiva2 | F-actin-capping protein subunit alpha-2 OS=Homo sapiens GN=CAPZA2 PE=1 SV=3                                               | CAZA2_HUMAN  | 32,949.20  | 100.00% | 4   | 4   | 4   | 26.90% |
| c(+)-Tiva2 | Heterogeneous nuclear ribonucleoprotein A/B OS=Homo sapiens GN=HNRNPAB PE=1 SV=2                                          | ROAA_HUMAN   | 66,225.20  | 99.80%  | 1   | 1   | 1   | 3.92%  |
| c(+)-Tiva2 | Protein SON OS=Homo sapiens GN=SON PE=1 SV=4                                                                              | SON_HUMAN    | 263,829.40 | 99.90%  | 1   | 1   | 1   | 0.45%  |
| c(+)-Tiva2 | Coiled-coil domain-containing protein 73 OS=Homo sapiens GN=CCDC73 PE=2 SV=2                                              | CCD73_HUMAN  | 124,157.50 | 66.00%  | 1   | 1   | 1   | 1.02%  |
| c(+)-Tiva2 | 40S ribosomal protein S8 OS=Homo sapiens GN=RPS8 PE=1 SV=2                                                                | RS8_HUMAN    | 24,206.40  | 95.00%  | 1   | 1   | 1   | 6.25%  |
| c(+)-Tiva2 | Serrate RNA effector molecule homolog OS=Homo sapiens GN=SRRT PE=1 SV=1                                                   | SRRT_HUMAN   | 100,669.70 | 100.00% | 1   | 1   | 1   | 1.48%  |
| c(+)-Tiva2 | Twinfilin-1 OS=Homo sapiens GN=TWIF1 PE=1 SV=3                                                                            | TWIF1_HUMAN  | 40,284.20  | 100.00% | 3   | 4   | 4   | 12.90% |
| c(+)-Tiva2 | ADP-ribosylation factor-like protein 1 OS=Homo sapiens GN=ARL1 PE=1 SV=1                                                  | ARL1_HUMAN   | 20,418.20  | 95.00%  | 1   | 1   | 1   | 7.73%  |
| c(+)-Tiva2 | Heat shock protein HSP 90-beta OS=Homo sapiens GN=HSP90AB1 PE=1 SV=4                                                      | HS90B_HUMAN  | 83,267.30  | 95.00%  | 1   | 1   | 1   | 2.07%  |
| c(+)-Tiva2 | Interleukin enhancer-binding factor 3 OS=Homo sapiens GN=ILF3 PE=1 SV=3                                                   | ILF3_HUMAN   | 95,338.90  | 100.00% | 13  | 13  | 15  | 25.20% |
| c(+)-Tiva2 | Peroxiredoxin-1 OS=Homo sapiens GN=PRDX1 PE=1 SV=1                                                                        | PRDX1_HUMAN  | 22,110.90  | 100.00% | 6   | 7   | 7   | 32.70% |
| c(+)-Tiva2 | Inosine-5'-monophosphate dehydrogenase 2 OS=Homo sapiens GN=IMPDH2 PE=1 SV=2                                              | IMDH2_HUMAN  | 55,806.50  | 14.10%  | 0   | 0   | 0   | 0.00%  |
| c(+)-Tiva2 | Heterogeneous nuclear ribonucleoprotein D-like OS=Homo sapiens GN=HNRPDL PE=1 SV=3                                        | HNRDL_HUMAN  | 46,438.60  | 100.00% | 2   | 2   | 2   | 5.95%  |
| c(+)-Tiva2 | Catenin alpha-1 OS=Homo sapiens GN=CTNNA1 PE=1 SV=1                                                                       | CTNA1_HUMAN  | 100,072.90 | 100.00% | 4   | 4   | 4   | 6.73%  |
| c(+)-Tiva2 | Heterogeneous nuclear ribonucleoprotein H OS=Homo sapiens GN=HNRNPH1 PE=1 SV=4                                            | HNRH1_HUMAN  | 49,229.80  | 100.00% | 8   | 10  | 12  | 28.70% |
| c(+)-Tiva2 | Protein phosphatase 1 regulatory subunit 12A OS=Homo sapiens GN=PPP1R12A PE=1 SV=1                                        | MYPT1_HUMAN  | 115,283.40 | 100.00% | 4   | 4   | 4   | 5.44%  |
| c(+)-Tiva2 | Heterogeneous nuclear ribonucleoproteins C1/C2 OS=Homo sapiens GN=HNRNPC PE=1 SV=4                                        | HNRPC_HUMAN  | 33,670.50  | 100.00% | 4   | 5   | 5   | 24.80% |
| c(+)-Tiva2 | 26S proteasome non-ATPase regulatory subunit 1 OS=Homo sapiens GN=PSMD1 PE=1 SV=2                                         | PSMD1_HUMAN  | 105,839.20 | 100.00% | 2   | 2   | 2   | 3.25%  |
| c(+)-Tiva2 | Splicing factor 3B subunit 3 OS=Homo sapiens GN=SF3B3 PE=1 SV=4                                                           | SF3B3_HUMAN  | 135,579.40 | 100.00% | 6   | 6   | 6   | 7.23%  |
| c(+)-Tiva2 | Integrin beta-4 OS=Homo sapiens GN=ITGB4 PE=1 SV=5                                                                        | ITB4_HUMAN   | 202,166.70 | 100.00% | 13  | 13  | 13  | 11.30% |
| c(+)-Tiva2 | Keratin, type I cytoskeletal 13 OS=Homo sapiens GN=KRT13 PE=1 SV=4                                                        | K1C13_HUMAN  | 49,589.30  | 100.00% | 2   | 2   | 2   | 6.55%  |
| c(+)-Tiva2 | Neurabin-2 OS=Homo sapiens GN=PPP1R9B PE=1 SV=2                                                                           | NEB2_HUMAN   | 89,192.20  | 99.80%  | 1   | 1   | 1   | 2.09%  |
| c(+)-Tiva2 | 40S ribosomal protein S18 OS=Homo sapiens GN=RPS18 PE=1 SV=3                                                              | RS18_HUMAN   | 17,719.30  | 99.70%  | 1   | 1   | 1   | 5.26%  |
| c(+)-Tiva2 | Flotillin-2 OS=Homo sapiens GN=FLOT2 PE=1 SV=2                                                                            | FLOT2_HUMAN  | 47,063.90  | 100.00% | 4   | 4   | 4   | 11.20% |
| c(+)-Tiva2 | Neurabin-1 OS=Homo sapiens GN=PPP1R9A PE=1 SV=2                                                                           | NEB1_HUMAN   | 123,343.60 | 100.00% | 8   | 8   | 8   | 12.60% |
| c(+)-Tiva2 | Adseverin OS=Homo sapiens GN=SCIN PE=1 SV=4                                                                               | ADSV_HUMAN   | 80,490.20  | 100.00% | 7   | 7   | 7   | 16.10% |
| c(+)-Tiva2 | Flotillin-1 OS=Homo sapiens GN=FLOT1 PE=1 SV=3                                                                            | FLOT1_HUMAN  | 47,354.80  | 100.00% | 3   | 3   | 3   | 10.80% |
| c(+)-Tiva2 | TOM1-like protein 2 OS=Homo sapiens GN=TOM1L2 PE=1 SV=1                                                                   | TM1L2_HUMAN  | 55,556.70  | 42.70%  | 0   | 0   | 0   | 0.00%  |
| c(+)-Tiva2 | Pre-mRNA branch site protein p14 OS=Homo sapiens GN=SF3B14 PE=1 SV=1                                                      | PM14_HUMAN   | 14,585.60  | 100.00% | 2   | 2   | 2   | 20.80% |
| c(+)-Tiva2 | Nuclear cap-binding protein subunit 1 OS=Homo sapiens GN=NCBP1 PE=1 SV=1                                                  | NCBP1_HUMAN  | 91,841.10  | 89.50%  | 1   | 1   | 1   | 1.39%  |
| c(+)-Tiva2 | Cation-independent mannose-6-phosphate receptor OS=Homo sapiens GN=IGF2R PE=1 SV=3                                        | MPRI_HUMAN   | 274,372.70 | 100.00% | 2   | 2   | 2   | 1.73%  |
| c(+)-Tiva2 | Protein scribble homolog OS=Homo sapiens GN=SCRIB PE=1 SV=4                                                               | SCRIB_HUMAN  | 174,887.30 | 100.00% | 1   | 1   | 1   | 0.61%  |
| c(+)-Tiva2 | DBIRD complex subunit KIAA1967 OS=Homo sapiens GN=KIAA1967 PE=1 SV=2                                                      | K1967_HUMAN  | 102,903.10 | 100.00% | 4   | 4   | 6   | 11.70% |
| c(+)-Tiva2 | Laminin subunit gamma-1 OS=Homo sapiens GN=LAMC1 PE=1 SV=3                                                                | LAMC1_HUMAN  | 177,601.30 | 100.00% | 5   | 5   | 5   | 4.72%  |
| c(+)-Tiva2 | Annexin A2 OS=Homo sapiens GN=ANXA2 PE=1 SV=2                                                                             | ANXA2_HUMAN  | 38,606.10  | 100.00% | 9   | 11  | 11  | 31.30% |
| c(+)-Tiva2 | Actin-binding LIM protein 1 OS=Homo sapiens GN=ABLIM1 PE=1 SV=3                                                           | ABLIM1_HUMAN | 87,689.00  | 100.00% | 3   | 3   | 3   | 7.20%  |
| c(+)-Tiva2 | Gamma-adducin OS=Homo sapiens GN=ADD3 PE=1 SV=1                                                                           | ADDG_HUMAN   | 79,156.00  | 92.50%  | 1   | 1   | 1   | 1.56%  |
| c(+)-Tiva2 | Coatomer subunit alpha OS=Homo sapiens GN=COPA PE=1 SV=2                                                                  | COPA_HUMAN   | 138,349.30 | 100.00% | 4   | 4   | 4   | 4.41%  |
| c(+)-Tiva2 | U4/U6 small nuclear ribonucleoprotein Prp4 OS=Homo sapiens GN=PRPF4 PE=1 SV=2                                             | PRP4_HUMAN   | 58,450.20  | 100.00% | 1   | 1   | 1   | 3.07%  |
| c(+)-Tiva2 | Small nuclear ribonucleoprotein Sm D1 OS=Homo sapiens GN=SNRPD1 PE=1 SV=1                                                 | SMD1_HUMAN   | 13,281.90  | 95.00%  | 1   | 1   | 1   | 10.90% |
| c(+)-Tiva2 | Long-chain-fatty-acid-CoA ligase 3 OS=Homo sapiens GN=ACSL3 PE=1 SV=3                                                     | ACSL3_HUMAN  | 80,423.10  | 100.00% | 3   | 3   | 3   | 6.94%  |
| c(+)-Tiva2 | Coronin-1B OS=Homo sapiens GN=CORO1B PE=1 SV=1                                                                            | COR1B_HUMAN  | 54,234.90  | 100.00% | 2   | 2   | 2   | 9.00%  |
| c(+)-Tiva2 | Plectin OS=Homo sapiens GN=PLEC PE=1 SV=3                                                                                 | PLEC_HUMAN   | 531,783.90 | 100.00% | 192 | 236 | 245 | 45.30% |
| c(+)-Tiva2 | ATP-dependent RNA helicase A OS=Homo sapiens GN=DHX9 PE=1 SV=4                                                            | DHX9_HUMAN   | 140,961.50 | 100.00% | 15  | 15  | 15  | 15.70% |
| c(+)-Tiva2 | Keratin, type II cytoskeletal 2 epidermal OS=Homo sapiens GN=KRT2 PE=1 SV=2                                               | K22E_HUMAN   | 65,433.90  | 100.00% | 10  | 10  | 10  | 21.40% |
| c(+)-Tiva2 | Twinfilin-2 OS=Homo sapiens GN=TWIF2 PE=1 SV=2                                                                            | TWIF2_HUMAN  | 39,548.90  | 100.00% | 2   | 3   | 3   | 10.90% |
| c(+)-Tiva2 | Pre-mRNA-processing factor 19 OS=Homo sapiens GN=PRPF19 PE=1 SV=1                                                         | PRP19_HUMAN  | 55,181.30  | 100.00% | 6   | 6   | 6   | 20.60% |
| c(+)-Tiva2 | Thioredoxin-dependent peroxide reductase, mitochondrial OS=Homo sapiens GN=PRDX3 PE=1 SV=3                                | PRDX3_HUMAN  | 27,692.70  | 100.00% | 4   | 4   | 4   | 30.10% |
| c(+)-Tiva2 | E3 ubiquitin-protein ligase UBR4 OS=Homo sapiens GN=UBR4 PE=1 SV=1                                                        | UBR4_HUMAN   | 573,842.50 | 89.20%  | 1   | 1   | 1   | 0.33%  |
| c(+)-Tiva2 | Heterogeneous nuclear ribonucleoprotein H3 OS=Homo sapiens GN=HNRNPH3 PE=1 SV=2                                           | HNRH3_HUMAN  | 36,927.60  | 100.00% | 2   | 2   | 2   | 8.38%  |
| c(+)-Tiva2 | 60S ribosomal protein L24 OS=Homo sapiens GN=RPL24 PE=1 SV=1                                                              | RL24_HUMAN   | 17,779.50  | 95.00%  | 1   | 1   | 1   | 8.28%  |
| c(+)-Tiva2 | Src substrate cortactin OS=Homo sapiens GN=CTTN PE=1 SV=2                                                                 | SRC8_HUMAN   | 61,585.50  | 100.00% | 7   | 7   | 7   | 18.00% |
| c(+)-Tiva2 | Dermcidin OS=Homo sapiens GN=DCD PE=1 SV=2                                                                                | DCD_HUMAN    | 11,284.10  | 100.00% | 3   | 3   | 3   | 22.70% |
| c(+)-Tiva2 | Histone H2A type 1-A OS=Homo sapiens GN=HIST1H2AA PE=1 SV=3                                                               | H2A1A_HUMAN  | 14,234.20  | 48.00%  | 1   | 1   | 1   | 6.87%  |
| c(+)-Tiva2 | 26S proteasome non-ATPase regulatory subunit 2 OS=Homo sapiens GN=PSMD2 PE=1 SV=3                                         | PSMD2_HUMAN  | 100,202.20 | 95.80%  | 1   | 1   | 2   | 3.08%  |
| c(+)-Tiva2 | Elongation factor Tu, mitochondrial OS=Homo sapiens GN=TFUJ PE=1 SV=2                                                     | EFTU_HUMAN   | 49,542.40  | 100.00% | 8   | 8   | 8   | 25.20% |
| c(+)-Tiva2 | Aldo-keto reductase family 1 member C1 OS=Homo sapiens GN=AKR1C1 PE=1 SV=1                                                | AK1C1_HUMAN  | 36,789.10  | 100.00% | 2   | 2   | 2   | 9.60%  |
| c(+)-Tiva2 | Heterogeneous nuclear ribonucleoprotein U OS=Homo sapiens GN=HNRNPU PE=1 SV=6                                             | HNRPU_HUMAN  | 90,585.20  | 100.00% | 19  | 23  | 29  | 27.00% |
| c(+)-Tiva2 | Uncharacterized protein C19orf21 OS=Homo sapiens GN=C19orf21 PE=1 SV=1                                                    | CSO21_HUMAN  | 75,355.70  | 100.00% | 9   | 9   | 9   | 23.60% |
| c(+)-Tiva2 | Keratin, type I cytoskeletal 14 OS=Homo sapiens GN=KRT14 PE=1 SV=4                                                        | K1C14_HUMAN  | 51,562.50  | 100.00% | 2   | 2   | 2   | 4.66%  |
| c(+)-Tiva2 | Fatty acid synthase OS=Homo sapiens GN=FASN PE=1 SV=3                                                                     | FAS_HUMAN    | 273,427.10 | 100.00% | 1   | 1   | 1   | 0.68%  |
| c(+)-Tiva2 | Putative tropomyosin alpha-3 chain-like protein OS=Homo sapiens PE=5 SV=2                                                 | TPM3L_HUMAN  | 26,270.00  | 100.00% | 1   | 1   | 1   | 6.28%  |
| c(+)-Tiva2 | Zinc finger RNA-binding protein OS=Homo sapiens GN=ZFR PE=1 SV=2                                                          | ZFR_HUMAN    | 117,011.80 | 100.00% | 1   | 1   | 1   | 1.12%  |
| c(+)-Tiva2 | Probable ATP-dependent RNA helicase DDX5 OS=Homo sapiens GN=DDX5 PE=1 SV=1                                                | DDX5_HUMAN   | 69,149.70  | 100.00% | 2   | 2   | 2   | 3.58%  |
| c(+)-Tiva2 | Myosin-9 OS=Homo sapiens GN=MYH9 PE=1 SV=4                                                                                | MYH9_HUMAN   | 226,537.50 | 100.00% | 112 | 189 | 231 | 54.00% |
| c(+)-Tiva2 | 60S ribosomal protein L10a OS=Homo sapiens GN=RPL10A PE=1 SV=2                                                            | RL10A_HUMAN  | 24,832.00  | 32.50%  | 0   | 0   | 0   | 0.00%  |
| c(+)-Tiva2 | ERO1-like protein alpha OS=Homo sapiens GN=ERO1L PE=1 SV=2                                                                | ERO1A_HUMAN  | 54,394.70  | 99.80%  | 1   | 1   | 2   | 6.41%  |
| c(+)-Tiva2 | Galectin-3-binding protein OS=Homo sapiens GN=LGALS3BP PE=1 SV=1                                                          | LG3BP_HUMAN  | 65,332.10  | 100.00% | 5   | 5   | 5   | 10.60% |
| c(+)-Tiva2 | 60S ribosomal protein L30 OS=Homo sapiens GN=RPL30 PE=1 SV=2                                                              | RL30_HUMAN   | 12,784.70  | 10.50%  | 0   | 0   | 0   | 0.00%  |
| c(+)-Tiva2 | Pyruvate dehydrogenase E1 component subunit alpha, testis-specific form, mitochondrial OS=Homo sapiens GN=PDHA2 PE=1 SV=2 | ODPAT_HUMAN  | 42,934.10  | 100.00% | 2   | 2   | 2   | 5.15%  |
| c(+)-Tiva2 | La-related protein 1B OS=Homo sapiens GN=LARP1B PE=1 SV=2                                                                 | LAR1B_HUMAN  | 105,324.50 | 12.90%  | 0   | 0   | 0   | 0.00%  |
| c(+)-Tiva2 | Heterogeneous nuclear ribonucleoprotein Cl-like 1 OS=Homo sapiens GN=HNRNPCL1 PE=1 SV=1                                   | HNRC1_HUMAN  | 32,142.70  | 100.00% | 1   | 1   | 1   | 3.41%  |
| c(+)-Tiva2 | 2-oxoglutarate dehydrogenase, mitochondrial OS=Homo sapiens GN=OGDH PE=1 SV=3                                             | ODO1_HUMAN   | 115,936.70 | 95.00%  | 1   | 1   | 2   | 2.15%  |
| c(+)-Tiva2 | DnaJ homolog subfamily C member 10 OS=Homo sapiens GN=DNAC10 PE=1 SV=2                                                    | DJC10_HUMAN  | 91,082.40  | 100.00% | 4   | 4   | 4   | 7.06%  |

|            |                                                                                                                 |                 |            |      |      |              |            |         |     |     |     |        |
|------------|-----------------------------------------------------------------------------------------------------------------|-----------------|------------|------|------|--------------|------------|---------|-----|-----|-----|--------|
| c(+)-Tiva2 | Histone-binding protein RBBP4                                                                                   | OS=Homo sapiens | GN=RBBP4   | PE=1 | SV=3 | RBBP4_HUMAN  | 47,655.80  | 99.90%  | 1   | 1   | 1   | 1.88%  |
| c(+)-Tiva2 | 116 kDa U5 small nuclear ribonucleoprotein component                                                            | OS=Homo sapiens | GN=EFTUD2  | PE=1 | SV=1 | US51_HUMAN   | 109,438.10 | 100.00% | 13  | 13  | 13  | 21.70% |
| c(+)-Tiva2 | Arginine-tRNA ligase, cytoplasmic                                                                               | OS=Homo sapiens | GN=RARS    | PE=1 | SV=2 | SYRC_HUMAN   | 75,382.00  | 100.00% | 2   | 2   | 2   | 3.94%  |
| c(+)-Tiva2 | Peroxisomal acyl-coenzyme A oxidase 1                                                                           | OS=Homo sapiens | GN=ACOX1   | PE=1 | SV=3 | ACOX1_HUMAN  | 74,425.40  | 55.40%  | 1   | 1   | 1   | 1.82%  |
| c(+)-Tiva2 | Glycogen synthase kinase-3 alpha                                                                                | OS=Homo sapiens | GN=GSK3A   | PE=1 | SV=2 | GSK3A_HUMAN  | 50,981.90  | 100.00% | 5   | 5   | 5   | 19.70% |
| c(+)-Tiva2 | Splicing factor 3B subunit 2                                                                                    | OS=Homo sapiens | GN=SF3B2   | PE=1 | SV=2 | SF3B2_HUMAN  | 100,229.40 | 100.00% | 5   | 5   | 5   | 10.80% |
| c(+)-Tiva2 | Myosin light polypeptide 6                                                                                      | OS=Homo sapiens | GN=MYL6    | PE=1 | SV=2 | MYL6_HUMAN   | 16,929.80  | 99.70%  | 1   | 1   | 1   | 19.20% |
| c(+)-Tiva2 | Transmembrane emp24 domain-containing protein 10                                                                | OS=Homo sapiens | GN=TMED10  | PE=1 | SV=2 | TMED10_HUMAN | 24,977.50  | 99.80%  | 1   | 1   | 1   | 5.02%  |
| c(+)-Tiva2 | Superkiller viralidic activity 2-like 2                                                                         | OS=Homo sapiens | GN=SKIV2L2 | PE=1 | SV=3 | SK2L2_HUMAN  | 117,808.30 | 100.00% | 4   | 4   | 4   | 4.61%  |
| c(+)-Tiva2 | Neuroblast differentiation-associated protein AHNK                                                              | OS=Homo sapiens | GN=AHNK    | PE=1 | SV=2 | AHNK_HUMAN   | 629,104.40 | 100.00% | 15  | 15  | 15  | 4.11%  |
| c(+)-Tiva2 | Single-stranded DNA-binding protein, mitochondrial                                                              | OS=Homo sapiens | GN=SSBP1   | PE=1 | SV=1 | SSBP_HUMAN   | 17,259.70  | 100.00% | 2   | 2   | 2   | 22.30% |
| c(+)-Tiva2 | Importin-7                                                                                                      | OS=Homo sapiens | GN=IPO7    | PE=1 | SV=1 | IPO7_HUMAN   | 119,519.50 | 98.80%  | 1   | 1   | 1   | 1.06%  |
| c(+)-Tiva2 | F-actin-capping protein subunit beta                                                                            | OS=Homo sapiens | GN=CAPZB   | PE=1 | SV=4 | CAPZB_HUMAN  | 31,351.60  | 100.00% | 9   | 9   | 9   | 33.20% |
| c(+)-Tiva2 | RNA-binding motif protein, X chromosome                                                                         | OS=Homo sapiens | GN=RBMX    | PE=1 | SV=3 | RBMX_HUMAN   | 42,333.70  | 100.00% | 7   | 7   | 7   | 19.70% |
| c(+)-Tiva2 | Mitochondrial import inner membrane translocase subunit TIM50                                                   | OS=Homo sapiens | GN=TIMM50  | PE=1 | SV=2 | TIM50_HUMAN  | 39,647.50  | 56.60%  | 1   | 1   | 1   | 4.82%  |
| c(+)-Tiva2 | Myosin light chain 1/3, skeletal muscle isoform                                                                 | OS=Homo sapiens | GN=MYL1    | PE=1 | SV=3 | MYL1_HUMAN   | 21,145.60  | 88.80%  | 1   | 1   | 2   | 8.25%  |
| c(+)-Tiva2 | Structural maintenance of chromosomes protein 1A                                                                | OS=Homo sapiens | GN=SMC1A   | PE=1 | SV=2 | SMC1A_HUMAN  | 143,238.30 | 100.00% | 5   | 5   | 5   | 7.06%  |
| c(+)-Tiva2 | Reticulocalbin-2                                                                                                | OS=Homo sapiens | GN=RCN2    | PE=1 | SV=1 | RCN2_HUMAN   | 36,877.60  | 13.40%  | 0   | 0   | 0   | 0.00%  |
| c(+)-Tiva2 | Eukaryotic translation initiation factor 3 subunit 8                                                            | OS=Homo sapiens | GN=EIF3B   | PE=1 | SV=3 | EIF3B_HUMAN  | 92,482.80  | 99.30%  | 1   | 1   | 1   | 2.09%  |
| c(+)-Tiva2 | Methionine-tRNA ligase, cytoplasmic                                                                             | OS=Homo sapiens | GN=MARS    | PE=1 | SV=2 | SYMC_HUMAN   | 101,117.50 | 97.90%  | 1   | 1   | 1   | 1.11%  |
| c(+)-Tiva2 | Keratin, type I cytoskeletal 17                                                                                 | OS=Homo sapiens | GN=KRT17   | PE=1 | SV=2 | KIC17_HUMAN  | 48,106.70  | 100.00% | 2   | 2   | 2   | 4.86%  |
| c(+)-Tiva2 | Envoplakin                                                                                                      | OS=Homo sapiens | GN=EVPL    | PE=1 | SV=3 | EVPL_HUMAN   | 231,604.40 | 100.00% | 3   | 3   | 3   | 2.31%  |
| c(+)-Tiva2 | Serine/threonine-protein phosphatase PP1-alpha catalytic subunit                                                | OS=Homo sapiens | GN=PPP1CA  | PE=1 | SV=1 | PP1A_HUMAN   | 37,513.90  | 100.00% | 2   | 2   | 2   | 6.97%  |
| c(+)-Tiva2 | Inositol hexakisphosphate kinase 3                                                                              | OS=Homo sapiens | GN=IPK3    | PE=1 | SV=2 | IPK3_HUMAN   | 46,416.40  | 99.70%  | 1   | 1   | 1   | 3.17%  |
| c(+)-Tiva2 | Extended synaptotagmin-1                                                                                        | OS=Homo sapiens | GN=ESYT1   | PE=1 | SV=1 | ESYT1_HUMAN  | 122,859.10 | 99.70%  | 1   | 1   | 1   | 1.45%  |
| c(+)-Tiva2 | Leucine-rich repeat flightless-interacting protein 1                                                            | OS=Homo sapiens | GN=LRRFIP1 | PE=1 | SV=2 | LRRF1_HUMAN  | 89,252.60  | 30.50%  | 0   | 0   | 0   | 0.00%  |
| c(+)-Tiva2 | Neutrophil gelatinase-associated lipocalin                                                                      | OS=Homo sapiens | GN=LCN2    | PE=1 | SV=2 | NGAL_HUMAN   | 22,588.90  | 68.50%  | 1   | 1   | 1   | 10.60% |
| c(+)-Tiva2 | T-complex protein 1 subunit alpha                                                                               | OS=Homo sapiens | GN=TCP1    | PE=1 | SV=1 | TCPA_HUMAN   | 60,345.20  | 99.90%  | 1   | 1   | 1   | 3.60%  |
| c(+)-Tiva2 | THO complex subunit 4                                                                                           | OS=Homo sapiens | GN=ALYREF  | PE=1 | SV=3 | THOC4_HUMAN  | 26,888.70  | 95.00%  | 1   | 1   | 1   | 7.00%  |
| c(+)-Tiva2 | RNA-binding protein FUS                                                                                         | OS=Homo sapiens | GN=FUS     | PE=1 | SV=1 | FUS_HUMAN    | 53,426.00  | 71.90%  | 1   | 1   | 1   | 3.23%  |
| c(+)-Tiva2 | Neutral cholesterol ester hydrolase 1                                                                           | OS=Homo sapiens | GN=NCEH1   | PE=1 | SV=3 | NCEH1_HUMAN  | 45,808.60  | 92.90%  | 1   | 1   | 1   | 2.94%  |
| c(+)-Tiva2 | 26S protease regulatory subunit 10B                                                                             | OS=Homo sapiens | GN=PSMC6   | PE=1 | SV=1 | PRS10_HUMAN  | 44,174.90  | 85.00%  | 1   | 1   | 1   | 7.71%  |
| c(+)-Tiva2 | Retinoic acid-induced protein 3                                                                                 | OS=Homo sapiens | GN=GRPCSA  | PE=1 | SV=2 | RAI3_HUMAN   | 40,252.60  | 99.70%  | 1   | 1   | 1   | 3.64%  |
| c(+)-Tiva2 | Dihydrolipoylysine-residue succinyltransferase component of 2-oxoglutarate dehydrogenase complex, mitochondrial | OS=Homo sapiens | GN=PDH     | PE=1 | SV=1 | ODO2_HUMAN   | 48,755.20  | 100.00% | 2   | 2   | 2   | 5.74%  |
| c(+)-Tiva2 | Heterogeneous nuclear ribonucleoprotein H2                                                                      | OS=Homo sapiens | GN=HNRNP2  | PE=1 | SV=1 | HNRH2_HUMAN  | 49,264.10  | 87.10%  | 1   | 1   | 1   | 2.90%  |
| c(+)-Tiva2 | Glycogen synthase kinase-3 beta                                                                                 | OS=Homo sapiens | GN=GSK3B   | PE=1 | SV=2 | GSK3B_HUMAN  | 46,745.30  | 100.00% | 7   | 8   | 8   | 26.00% |
| c(+)-Tiva2 | Zinc finger protein 185                                                                                         | OS=Homo sapiens | GN=ZNF185  | PE=1 | SV=3 | ZN185_HUMAN  | 73,525.40  | 100.00% | 2   | 2   | 2   | 6.39%  |
| c(+)-Tiva2 | Cytoplasmic dynein 1 heavy chain 1                                                                              | OS=Homo sapiens | GN=DYNC1H1 | PE=1 | SV=5 | DYHC1_HUMAN  | 532,405.60 | 100.00% | 3   | 3   | 3   | 1.31%  |
| c(+)-Tiva2 | CAD protein                                                                                                     | OS=Homo sapiens | GN=CAD     | PE=1 | SV=3 | PYR1_HUMAN   | 242,982.50 | 92.40%  | 1   | 1   | 1   | 0.67%  |
| c(+)-Tiva2 | Unconventional myosin-1d                                                                                        | OS=Homo sapiens | GN=MYO1D   | PE=1 | SV=2 | MYO1D_HUMAN  | 116,206.20 | 100.00% | 4   | 4   | 4   | 6.66%  |
| c(+)-Tiva2 | Epilakin                                                                                                        | OS=Homo sapiens | GN=EPPK1   | PE=1 | SV=2 | EPIPL_HUMAN  | 555,615.40 | 100.00% | 7   | 8   | 8   | 1.91%  |
| c(+)-Tiva2 | Double-stranded RNA-specific adenosine deaminase                                                                | OS=Homo sapiens | GN=ADAR    | PE=1 | SV=4 | DSRAD_HUMAN  | 136,070.00 | 80.40%  | 1   | 1   | 1   | 1.47%  |
| c(+)-Tiva2 | Catenin delta-1                                                                                                 | OS=Homo sapiens | GN=CTNND1  | PE=1 | SV=1 | CTND1_HUMAN  | 108,171.90 | 100.00% | 6   | 6   | 6   | 9.50%  |
| c(+)-Tiva2 | Tyrosine-protein kinase Lyn                                                                                     | OS=Homo sapiens | GN=LYN     | PE=1 | SV=3 | LYN_HUMAN    | 58,576.30  | 14.90%  | 0   | 0   | 0   | 0.00%  |
| c(+)-Tiva2 | N6-adenosine-methyltransferase 70 kDa subunit                                                                   | OS=Homo sapiens | GN=METT13  | PE=1 | SV=2 | MTA70_HUMAN  | 64,475.00  | 95.00%  | 1   | 1   | 1   | 3.10%  |
| c(+)-Tiva2 | Zinc finger protein 18                                                                                          | OS=Homo sapiens | GN=ZNF18   | PE=2 | SV=2 | ZN18_HUMAN   | 62,288.30  | 37.70%  | 0   | 0   | 0   | 0.00%  |
| c(+)-Tiva2 | Glucose-6-phosphate 1-dehydrogenase                                                                             | OS=Homo sapiens | GN=G6PD    | PE=1 | SV=4 | G6PD_HUMAN   | 59,258.10  | 99.80%  | 1   | 1   | 1   | 2.14%  |
| c(+)-Tiva2 | Prohibitin-2                                                                                                    | OS=Homo sapiens | GN=PHB2    | PE=1 | SV=2 | PHB2_HUMAN   | 33,297.60  | 100.00% | 3   | 3   | 3   | 13.00% |
| c(+)-Tiva2 | Protein Sec13 homolog                                                                                           | OS=Homo sapiens | GN=TPR     | PE=1 | SV=3 | TPR_HUMAN    | 267,289.30 | 100.00% | 25  | 25  | 27  | 14.90% |
| c(+)-Tiva2 | Aminoacyl tRNA synthase complex-interacting multifunctional protein 1                                           | OS=Homo sapiens | GN=AIMP1   | PE=1 | SV=2 | AIMP1_HUMAN  | 34,353.00  | 10.70%  | 0   | 0   | 0   | 0.00%  |
| c(+)-Tiva2 | Serum albumin                                                                                                   | OS=Homo sapiens | GN=ALB     | PE=1 | SV=2 | ALBU_HUMAN   | 69,366.90  | 7.20%   | 0   | 0   | 0   | 0.00%  |
| c(+)-Tiva2 | Sciellin                                                                                                        | OS=Homo sapiens | GN=SCEL    | PE=1 | SV=2 | SCEL_HUMAN   | 77,553.40  | 99.80%  | 1   | 1   | 1   | 1.45%  |
| c(+)-Tiva2 | Keratin, type I cytoskeletal 18                                                                                 | OS=Homo sapiens | GN=KRT18   | PE=1 | SV=2 | KIC18_HUMAN  | 48,059.00  | 100.00% | 13  | 16  | 18  | 39.50% |
| c(+)-Tiva2 | Calnexin                                                                                                        | OS=Homo sapiens | GN=CANX    | PE=1 | SV=2 | CALX_HUMAN   | 67,570.20  | 83.10%  | 1   | 1   | 1   | 3.55%  |
| c(+)-Tiva2 | NF-kappa-B-activating protein                                                                                   | OS=Homo sapiens | GN=NKAP    | PE=1 | SV=1 | NKAP_HUMAN   | 47,140.40  | 63.40%  | 1   | 1   | 1   | 2.41%  |
| c(+)-Tiva2 | Cofilin-2                                                                                                       | OS=Homo sapiens | GN=CF2     | PE=1 | SV=1 | COF2_HUMAN   | 18,737.30  | 95.00%  | 1   | 1   | 1   | 12.00% |
| c(+)-Tiva2 | Laminin subunit beta-3                                                                                          | OS=Homo sapiens | GN=LAMB3   | PE=1 | SV=1 | LAMB3_HUMAN  | 129,571.00 | 100.00% | 4   | 4   | 5   | 5.55%  |
| c(+)-Tiva2 | Double-strand break repair protein MRE11A                                                                       | OS=Homo sapiens | GN=MRE11A  | PE=1 | SV=3 | MRE11_HUMAN  | 80,595.10  | 85.80%  | 1   | 1   | 1   | 1.84%  |
| c(+)-Tiva2 | 26S protease regulatory subunit 6B                                                                              | OS=Homo sapiens | GN=PSM4    | PE=1 | SV=2 | PRS6B_HUMAN  | 47,367.70  | 78.10%  | 1   | 1   | 1   | 4.78%  |
| c(+)-Tiva2 | Drebrin                                                                                                         | OS=Homo sapiens | GN=DBN1    | PE=1 | SV=4 | DREB_HUMAN   | 71,428.60  | 100.00% | 22  | 29  | 29  | 38.40% |
| c(+)-Tiva2 | Leucine-rich repeat flightless-interacting protein 2                                                            | OS=Homo sapiens | GN=LRRFIP2 | PE=1 | SV=1 | LRRF2_HUMAN  | 82,174.50  | 100.00% | 3   | 3   | 3   | 6.24%  |
| c(+)-Tiva2 | L-2-hydroxyglutarate dehydrogenase, mitochondrial                                                               | OS=Homo sapiens | GN=L2HGDH  | PE=1 | SV=3 | L2HDH_HUMAN  | 50,317.40  | 100.00% | 2   | 2   | 3   | 8.21%  |
| c(+)-Tiva2 | Tubulin alpha-1B chain                                                                                          | OS=Homo sapiens | GN=TUBA1B  | PE=1 | SV=1 | TBA1B_HUMAN  | 50,151.70  | 95.00%  | 1   | 1   | 1   | 2.88%  |
| c(+)-Tiva2 | Unconventional myosin-XIX                                                                                       | OS=Homo sapiens | GN=MYO19   | PE=2 | SV=2 | MYO19_HUMAN  | 109,136.20 | 94.20%  | 1   | 1   | 1   | 1.13%  |
| c(+)-Tiva2 | Desmin                                                                                                          | OS=Homo sapiens | GN=DES     | PE=1 | SV=3 | DESM_HUMAN   | 53,536.60  | 100.00% | 2   | 2   | 2   | 1.91%  |
| c(+)-Tiva2 | Tubulin alpha-1A chain                                                                                          | OS=Homo sapiens | GN=TUBA1A  | PE=1 | SV=1 | TBA1A_HUMAN  | 50,135.70  | 100.00% | 10  | 10  | 10  | 35.00% |
| c(+)-Tiva2 | Myosin light chain 6B                                                                                           | OS=Homo sapiens | GN=MYL6B   | PE=1 | SV=1 | MYL6B_HUMAN  | 22,764.10  | 100.00% | 2   | 2   | 2   | 11.50% |
| c(+)-Tiva2 | Apelin receptor                                                                                                 | OS=Homo sapiens | GN=APLNR   | PE=1 | SV=1 | APJ_HUMAN    | 42,661.10  | 48.90%  | 1   | 1   | 1   | 2.11%  |
| c(+)-Tiva2 | Filamin-B                                                                                                       | OS=Homo sapiens | GN=FLNB    | PE=1 | SV=2 | FLNB_HUMAN   | 278,158.80 | 100.00% | 40  | 40  | 48  | 27.10% |
| c(+)-Tiva2 | Matrin-3                                                                                                        | OS=Homo sapiens | GN=MATR3   | PE=1 | SV=2 | MATR3_HUMAN  | 94,626.70  | 100.00% | 7   | 7   | 7   | 13.00% |
| c(+)-Tiva2 | Laminin subunit alpha-3                                                                                         | OS=Homo sapiens | GN=LAMA3   | PE=1 | SV=2 | LAMA3_HUMAN  | 366,642.50 | 95.00%  | 1   | 1   | 1   | 0.45%  |
| c(+)-Tiva2 | Unconventional myosin-Va                                                                                        | OS=Homo sapiens | GN=MYO5A   | PE=1 | SV=2 | MYO5A_HUMAN  | 215,412.60 | 100.00% | 20  | 20  | 20  | 14.10% |
| c(+)-Tiva2 | Histone deacetylase 1                                                                                           | OS=Homo sapiens | GN=HDAC1   | PE=1 | SV=1 | HDAC1_HUMAN  | 55,104.10  | 96.90%  | 0   | 0   | 0   | 0.00%  |
| c(+)-Tiva2 | Heterogeneous nuclear ribonucleoprotein D0                                                                      | OS=Homo sapiens | GN=HNRNP   | PE=1 | SV=1 | HNRPD_HUMAN  | 38,434.50  | 100.00% | 3   | 3   | 3   | 8.73%  |
| c(+)-Tiva2 | Pre-mRNA-processing-splicing factor 8                                                                           | OS=Homo sapiens | GN=PRPF8   | PE=1 | SV=2 | PRPF8_HUMAN  | 273,608.60 | 100.00% | 7   | 7   | 7   | 4.45%  |
| c(+)-Tiva2 | Guanine nucleotide-binding protein-like 3                                                                       | OS=Homo sapiens | GN=GNL3    | PE=1 | SV=2 | GNL3_HUMAN   | 61,994.70  | 100.00% | 1   | 1   | 1   | 2.73%  |
| c(+)-Tiva2 | Actin-related protein 2/3 complex subunit 1A                                                                    | OS=Homo sapiens | GN=ARPC1A  | PE=1 | SV=2 | ARC1A_HUMAN  | 41,569.20  | 57.50%  | 1   | 1   | 1   | 2.16%  |
| c(+)-Tiva2 | Heat shock cognate 71 kDa protein                                                                               | OS=Homo sapiens | GN=HSPA8   | PE=1 | SV=1 | HSP7C_HUMAN  | 70,899.80  | 100.00% | 7   | 7   | 7   | 15.30% |
| c(+)-Tiva2 | Inverted formin-2                                                                                               | OS=Homo sapiens | GN=INF2    | PE=1 | SV=2 | INF2_HUMAN   | 135,627.30 | 69.80%  | 1   | 1   | 1   | 0.96%  |
| c(+)-Tiva2 | Signal-induced proliferation-associated 3-like protein 1                                                        | OS=Homo sapiens | GN=SIPA1L1 | PE=1 | SV=4 | SI1L1_HUMAN  | 200,032.20 | 51.70%  | 1   | 1   | 1   | 0.61%  |
| c(+)-Tiva2 | Eukaryotic initiation factor 4A-1                                                                               | OS=Homo sapiens | GN=EIF4A1  | PE=1 | SV=1 | IF4A1_HUMAN  | 46,155.30  | 74.60%  | 1   | 1   | 1   | 3.45%  |
| c(+)-Tiva2 | Pyruvate dehydrogenase E1 component subunit beta, mitochondrial                                                 | OS=Homo sapiens | GN=PDHB    | PE=1 | SV=3 | ODPB_HUMAN   | 39,233.40  | 100.00% | 4   | 5   | 5   | 16.40% |
| c(+)-Tiva2 | Protein SEC13 homolog                                                                                           | OS=Homo sapiens | GN=SEC13   | PE=1 | SV=3 | SEC13_HUMAN  | 35,539.60  | 99.80%  | 1   | 1   | 1   | 7.14%  |
| c(+)-Tiva2 | Hepatocyte growth factor receptor                                                                               | OS=Homo sapiens | GN=MET     | PE=1 | SV=4 | MET_HUMAN    | 155,543.40 | 100.00% | 5   | 5   | 5   | 5.11%  |
| c(+)-Tiva2 | Aldo-keto reductase family 1 member C3                                                                          | OS=Homo sapiens | GN=AKR1C3  | PE=1 | SV=4 | AK1C3_HUMAN  | 36,854.10  | 88.50%  | 1   | 1   | 1   | 6.19%  |
| c(+)-Tiva2 | Pyruvate dehydrogenase protein X component, mitochondrial                                                       | OS=Homo sapiens | GN=PDHX    | PE=1 | SV=3 | ODPX_HUMAN   | 54,123.80  | 99.40%  | 1   | 1   | 1   | 3.79%  |
| c(+)-Tiva2 | Complement decay-accelerating factor                                                                            | OS=Homo sapiens | GN=CD55    | PE=1 | SV=4 | DAF_HUMAN    | 41,400.10  | 85.70%  | 0   | 0   | 0   | 0.00%  |
| c(+)-Tiva2 | Acyl-CoA dehydrogenase family member 9, mitochondrial                                                           | OS=Homo sapiens | GN=ACAD9   | PE=1 | SV=1 | ACAD9_HUMAN  | 68,762.80  | 100.00% | 1   | 1   | 1   | 2.42%  |
| c(+)-Tiva2 | 40S ribosomal protein S27                                                                                       | OS=Homo sapiens | GN=RPS27   | PE=1 | SV=3 | RS27_HUMAN   | 9,460.90   | 15.40%  | 0   | 0   | 0   | 0.00%  |
| c(+)-Tiva2 | 60 kDa heat shock protein, mitochondrial                                                                        | OS=Homo sapiens | GN=HSPD1   | PE=1 | SV=2 | CH60_HUMAN   | 61,055.70  | 100.00% | 9   | 9   | 10  | 21.30% |
| c(+)-Tiva2 | Nuclear pore complex protein Nup155                                                                             | OS=Homo sapiens | GN=NUP155  | PE=1 | SV=1 | NU155_HUMAN  | 155,203.00 | 100.00% | 3   | 3   | 3   | 2.88%  |
| c(+)-Tiva2 | Myb-binding protein 1A                                                                                          | OS=Homo sapiens | GN=MYBBP1A | PE=1 | SV=2 | MBB1A_HUMAN  | 148,858.30 | 100.00% | 2   | 2   | 2   | 2.94%  |
| c(+)-Tiva2 | Heterogeneous nuclear ribonucleoprotein A1-like 2                                                               | OS=Homo sapiens | GN=HNRNP   | PE=2 | SV=2 | RA1L2_HUMAN  | 34,225.40  | 100.00% | 7   | 7   | 7   | 30.30% |
| c(+)-Tiva2 | Tropomodulin-3                                                                                                  | OS=Homo sapiens | GN=TMOD3   | PE=1 | SV=1 | TMOD3_HUMAN  | 39,596.10  | 100.00% | 8   | 9   | 9   | 32.10% |
| c(+)-Tiva2 | Spectrin beta chain, non-erythrocytic 1                                                                         | OS=Homo sapiens | GN=SPTB    | PE=1 | SV=2 | SPTB2_HUMAN  | 274,613.40 | 100.00% | 138 | 198 | 234 | 58.50% |
| c(+)-Tiva2 | Non-POU domain-containing octamer-binding protein                                                               | OS=Homo sapiens | GN=NONO    | PE=1 | SV=4 | NONO_HUMAN   | 54,231.60  | 100.00% | 3   | 3   | 4   | 11.70% |
| c(+)-Tiva2 | Inositol 1,4,5-trisphosphate receptor type 3                                                                    | OS=Homo sapiens | GN=ITPR3   |      |      |              |            |         |     |     |     |        |

|            |                                                                                                      |                                        |               |            |         |    |    |    |        |
|------------|------------------------------------------------------------------------------------------------------|----------------------------------------|---------------|------------|---------|----|----|----|--------|
| c(+)-Tiva2 | 60S ribosomal protein L11                                                                            | OS=Homo sapiens GN=RPL11 PE=1 SV=2     | RL11_HUMAN    | 20,253.20  | 95.00%  | 1  | 1  | 1  | 7.87%  |
| c(+)-Tiva2 | Unconventional myosin-Vb                                                                             | OS=Homo sapiens GN=MYO5B PE=1 SV=3     | MYO5B_HUMAN   | 213,676.50 | 100.00% | 16 | 16 | 16 | 12.90% |
| c(+)-Tiva2 | Heterogeneous nuclear ribonucleoprotein F                                                            | OS=Homo sapiens GN=HNRNPF PE=1 SV=3    | HNRPF_HUMAN   | 45,671.90  | 100.00% | 2  | 2  | 2  | 7.95%  |
| c(+)-Tiva2 | Eukaryotic initiation factor 4A-III                                                                  | OS=Homo sapiens GN=EIF4A3 PE=1 SV=4    | IF4A3_HUMAN   | 46,872.40  | 95.00%  | 1  | 1  | 1  | 3.16%  |
| c(+)-Tiva2 | Major vault protein                                                                                  | OS=Homo sapiens GN=MVP PE=1 SV=4       | MVP_HUMAN     | 99,326.00  | 100.00% | 5  | 5  | 5  | 7.61%  |
| c(+)-Tiva2 | DnaJ homolog subfamily C member 13                                                                   | OS=Homo sapiens GN=DNAJC13 PE=1 SV=5   | DJC13_HUMAN   | 254,422.90 | 100.00% | 3  | 3  | 3  | 2.10%  |
| c(+)-Tiva2 | ATP-binding cassette sub-family A member 5                                                           | OS=Homo sapiens GN=ABCA5 PE=2 SV=2     | ABCA5_HUMAN   | 186,517.10 | 9.00%   | 0  | 0  | 0  | 0.00%  |
| c(+)-Tiva2 | Insulin-like growth factor 2 mRNA-binding protein 3                                                  | OS=Homo sapiens GN=IGFBP3 PE=1 SV=2    | IF2B3_HUMAN   | 63,706.00  | 99.80%  | 1  | 1  | 1  | 2.76%  |
| c(+)-Tiva2 | Protein disulfide-isomerase A6                                                                       | OS=Homo sapiens GN=PDIA6 PE=1 SV=1     | PDIA6_HUMAN   | 48,122.30  | 93.60%  | 1  | 1  | 1  | 3.18%  |
| c(+)-Tiva2 | Tumor suppressor p53-binding protein 1                                                               | OS=Homo sapiens GN=TP53BP1 PE=1 SV=2   | TP53B_HUMAN   | 213,572.20 | 100.00% | 7  | 7  | 7  | 6.39%  |
| c(+)-Tiva2 | Serine/arginine-rich splicing factor 3                                                               | OS=Homo sapiens GN=SRSF3 PE=1 SV=1     | SRSF3_HUMAN   | 19,330.00  | 100.00% | 2  | 2  | 2  | 18.30% |
| c(+)-Tiva2 | Importin subunit beta-1                                                                              | OS=Homo sapiens GN=KPMB1 PE=1 SV=2     | IMB1_HUMAN    | 97,171.30  | 100.00% | 2  | 2  | 2  | 3.20%  |
| c(+)-Tiva2 | Dolichyl-diphosphooligosaccharide--protein glycosyltransferase subunit 1                             | OS=Homo sapiens GN=RPNI1 PE=1 SV=1     | RPNI1_HUMAN   | 68,571.00  | 98.90%  | 1  | 1  | 1  | 2.47%  |
| c(+)-Tiva2 | Erythrocyte band 7 integral membrane protein                                                         | OS=Homo sapiens GN=STOM PE=1 SV=3      | STOM_HUMAN    | 31,732.10  | 100.00% | 3  | 3  | 3  | 13.50% |
| c(+)-Tiva2 | Myoferlin                                                                                            | OS=Homo sapiens GN=MYOF PE=1 SV=1      | MYOF_HUMAN    | 234,715.60 | 100.00% | 2  | 2  | 2  | 1.16%  |
| c(+)-Tiva2 | Ladinin-1                                                                                            | OS=Homo sapiens GN=LAD1 PE=1 SV=2      | LAD1_HUMAN    | 57,131.80  | 100.00% | 8  | 8  | 8  | 21.30% |
| c(+)-Tiva2 | Leucine zipper protein 1                                                                             | OS=Homo sapiens GN=LUZP1 PE=1 SV=2     | LUZP1_HUMAN   | 120,277.40 | 73.30%  | 1  | 1  | 1  | 2.23%  |
| c(+)-Tiva2 | Stress-70 protein, mitochondrial                                                                     | OS=Homo sapiens GN=HSPA9 PE=1 SV=2     | GRP75_HUMAN   | 73,681.30  | 100.00% | 3  | 3  | 4  | 6.19%  |
| c(+)-Tiva2 | SWI/SNF complex subunit SMARCC2                                                                      | OS=Homo sapiens GN=SMARCC2 PE=1 SV=1   | SMRC2_HUMAN   | 132,880.40 | 100.00% | 2  | 2  | 2  | 3.54%  |
| c(+)-Tiva2 | Keratin, type II cytoskeletal 1                                                                      | OS=Homo sapiens GN=KRT1 PE=1 SV=6      | K2C1_HUMAN    | 66,040.30  | 100.00% | 7  | 7  | 7  | 12.60% |
| c(+)-Tiva2 | 40S ribosomal protein S29                                                                            | OS=Homo sapiens GN=RP529 PE=1 SV=2     | RS29_HUMAN    | 6,676.90   | 6.40%   | 0  | 0  | 0  | 0.00%  |
| c(+)-Tiva2 | Glyceraldehyde 3-phosphate dehydrogenase                                                             | OS=Homo sapiens GN=GAPDH PE=1 SV=3     | G3P_HUMAN     | 36,053.40  | 100.00% | 4  | 4  | 4  | 24.80% |
| c(+)-Tiva2 | 40S ribosomal protein S28                                                                            | OS=Homo sapiens GN=RP528 PE=1 SV=1     | RS28_HUMAN    | 7,840.90   | 95.00%  | 1  | 1  | 1  | 17.40% |
| c(+)-Tiva2 | POTE ankyrin domain family member E                                                                  | OS=Homo sapiens GN=POTEE PE=1 SV=3     | POTEE_HUMAN   | 121,366.20 | 95.00%  | 1  | 1  | 1  | 2.60%  |
| c(+)-Tiva2 | Desmoplakin                                                                                          | OS=Homo sapiens GN=DSP PE=1 SV=3       | DESP_HUMAN    | 331,781.40 | 100.00% | 7  | 7  | 8  | 3.41%  |
| c(+)-Tiva2 | Scaffold attachment factor B1                                                                        | OS=Homo sapiens GN=SAFB PE=1 SV=4      | SAFB1_HUMAN   | 102,642.80 | 100.00% | 6  | 6  | 6  | 14.20% |
| c(+)-Tiva2 | Polymerase I and transcript release factor                                                           | OS=Homo sapiens GN=PTRF PE=1 SV=1      | PTRF_HUMAN    | 43,475.50  | 100.00% | 3  | 4  | 4  | 12.80% |
| c(+)-Tiva2 | Unconventional myosin-XVIIa                                                                          | OS=Homo sapiens GN=MYO18A PE=1 SV=3    | MY18A_HUMAN   | 233,119.80 | 100.00% | 20 | 21 | 22 | 15.90% |
| c(+)-Tiva2 | Minor histocompatibility antigen H13                                                                 | OS=Homo sapiens GN=HM13 PE=1 SV=1      | HM13_HUMAN    | 41,490.90  | 21.80%  | 0  | 0  | 0  | 0.00%  |
| c(+)-Tiva2 | Cohesin subunit SA-2                                                                                 | OS=Homo sapiens GN=STAG2 PE=1 SV=3     | STAG2_HUMAN   | 141,331.80 | 94.40%  | 1  | 1  | 2  | 2.11%  |
| c(+)-Tiva2 | Keratin, type II cytoskeletal 75                                                                     | OS=Homo sapiens GN=KRT75 PE=1 SV=2     | K2C75_HUMAN   | 59,561.30  | 92.40%  | 1  | 1  | 1  | 1.63%  |
| c(+)-Tiva2 | Heat shock 70 kDa protein 1A/1B                                                                      | OS=Homo sapiens GN=HSPA1A PE=1 SV=5    | HSP71_HUMAN   | 70,054.00  | 100.00% | 3  | 3  | 3  | 6.71%  |
| c(+)-Tiva2 | 40S ribosomal protein S3a                                                                            | OS=Homo sapiens GN=RP53A PE=1 SV=2     | RS3A_HUMAN    | 29,945.30  | 99.90%  | 1  | 1  | 1  | 3.03%  |
| c(+)-Tiva2 | Actin, alpha cardiac muscle 1                                                                        | OS=Homo sapiens GN=ACTC1 PE=1 SV=1     | ACTC_HUMAN    | 42,020.10  | 78.60%  | 1  | 1  | 1  | 7.16%  |
| c(+)-Tiva2 | Tubulin beta-3 chain                                                                                 | OS=Homo sapiens GN=TUBB3 PE=1 SV=2     | TBB3_HUMAN    | 50,432.70  | 99.10%  | 1  | 1  | 2  | 2.67%  |
| c(+)-Tiva2 | Transferrin receptor protein 1                                                                       | OS=Homo sapiens GN=TFRC PE=1 SV=2      | TFR1_HUMAN    | 84,873.60  | 100.00% | 4  | 4  | 4  | 7.37%  |
| c(+)-Tiva2 | Unconventional myosin-Vc                                                                             | OS=Homo sapiens GN=MYO5C PE=1 SV=2     | MYO5C_HUMAN   | 202,816.50 | 100.00% | 6  | 6  | 6  | 4.59%  |
| c(+)-Tiva2 | Dynamins-like 120 kDa protein, mitochondrial                                                         | OS=Homo sapiens GN=OPA1 PE=1 SV=3      | OPA1_HUMAN    | 111,633.90 | 100.00% | 14 | 15 | 15 | 19.80% |
| c(+)-Tiva2 | Heat shock 70 kDa protein 1-like                                                                     | OS=Homo sapiens GN=HSPA1L PE=1 SV=2    | HS71L_HUMAN   | 70,377.10  | 100.00% | 4  | 4  | 4  | 8.58%  |
| c(+)-Tiva2 | Tight junction protein ZO-1                                                                          | OS=Homo sapiens GN=TJP1 PE=1 SV=3      | ZO1_HUMAN     | 195,460.40 | 93.40%  | 1  | 1  | 1  | 0.74%  |
| c(+)-Tiva2 | 4F2 cell-surface antigen heavy chain                                                                 | OS=Homo sapiens GN=SLC3A2 PE=1 SV=3    | 4F2_HUMAN     | 67,996.40  | 95.00%  | 1  | 1  | 1  | 3.33%  |
| c(+)-Tiva2 | Histone deacetylase 2                                                                                | OS=Homo sapiens GN=HDAC2 PE=1 SV=2     | HDAC2_HUMAN   | 55,365.50  | 93.20%  | 1  | 1  | 1  | 3.69%  |
| c(+)-Tiva2 | Nuclear mitotic apparatus protein 1                                                                  | OS=Homo sapiens GN=NUMA1 PE=1 SV=2     | NUMA1_HUMAN   | 238,259.70 | 100.00% | 27 | 28 | 28 | 18.50% |
| c(+)-Tiva2 | Transitional endoplasmic reticulum ATPase                                                            | OS=Homo sapiens GN=VCP PE=1 SV=4       | TERA_HUMAN    | 89,324.80  | 100.00% | 4  | 4  | 4  | 7.57%  |
| c(+)-Tiva2 | Cadherin-1                                                                                           | OS=Homo sapiens GN=CDH1 PE=1 SV=3      | CADH1_HUMAN   | 97,457.60  | 93.00%  | 1  | 2  | 2  | 1.81%  |
| c(+)-Tiva2 | Keratin, type II cytoskeletal 4                                                                      | OS=Homo sapiens GN=KRT4 PE=1 SV=4      | K2C4_HUMAN    | 57,286.10  | 100.00% | 10 | 10 | 10 | 23.40% |
| c(+)-Tiva2 | Keratin, type II cytoskeletal 3                                                                      | OS=Homo sapiens GN=KRT3 PE=1 SV=3      | K2C3_HUMAN    | 64,418.90  | 100.00% | 3  | 3  | 3  | 3.34%  |
| c(+)-Tiva2 | Endoplasmic reticulum protein                                                                        | OS=Homo sapiens GN=HSP90B1 PE=1 SV=1   | ENPL_HUMAN    | 92,471.70  | 95.00%  | 1  | 1  | 1  | 1.74%  |
| c(+)-Tiva2 | CD109 antigen                                                                                        | OS=Homo sapiens GN=CD109 PE=1 SV=2     | CD109_HUMAN   | 161,692.20 | 100.00% | 1  | 1  | 1  | 0.90%  |
| c(+)-Tiva2 | Serine/arginine-rich splicing factor 1                                                               | OS=Homo sapiens GN=SRSF1 PE=1 SV=2     | SRSF1_HUMAN   | 27,745.10  | 100.00% | 4  | 4  | 4  | 22.20% |
| c(+)-Tiva2 | Small nuclear ribonucleoprotein Sm D2                                                                | OS=Homo sapiens GN=SNRPD2 PE=1 SV=1    | SMD2_HUMAN    | 13,527.10  | 78.50%  | 1  | 1  | 1  | 8.47%  |
| c(+)-Tiva2 | Transformer-2 protein homolog beta                                                                   | OS=Homo sapiens GN=TRA2B PE=1 SV=1     | TRA2B_HUMAN   | 33,666.70  | 95.00%  | 1  | 1  | 1  | 4.86%  |
| c(+)-Tiva2 | Splicing factor 3A subunit 1                                                                         | OS=Homo sapiens GN=SF3A1 PE=1 SV=1     | SF3A1_HUMAN   | 88,886.10  | 100.00% | 3  | 3  | 3  | 6.18%  |
| c(+)-Tiva2 | Nuclear pore complex protein Nup160                                                                  | OS=Homo sapiens GN=NUP160 PE=1 SV=3    | NU160_HUMAN   | 162,125.00 | 100.00% | 4  | 4  | 4  | 4.11%  |
| c(+)-Tiva2 | Spectrin beta chain, non-erythrocytic 2                                                              | OS=Homo sapiens GN=SNRPD2 PE=1 SV=1    | SPTN2_HUMAN   | 271,325.90 | 100.00% | 47 | 53 | 56 | 25.10% |
| c(+)-Tiva2 | Fatty aldehyde dehydrogenase                                                                         | OS=Homo sapiens GN=ALDH3A2 PE=1 SV=1   | AL3A2_HUMAN   | 54,849.80  | 99.90%  | 1  | 1  | 1  | 2.68%  |
| c(+)-Tiva2 | Small nuclear ribonucleoprotein E                                                                    | OS=Homo sapiens GN=SNRPE PE=1 SV=1     | RUXE_HUMAN    | 10,803.90  | 78.80%  | 1  | 1  | 1  | 13.00% |
| c(+)-Tiva2 | Heat shock-related 70 kDa protein 2                                                                  | OS=Homo sapiens GN=HSPA2 PE=1 SV=1     | HSP72_HUMAN   | 70,023.00  | 100.00% | 4  | 4  | 4  | 5.79%  |
| c(+)-Tiva2 | Keratin, type I cytoskeletal 9                                                                       | OS=Homo sapiens GN=KRT9 PE=1 SV=3      | K1C9_HUMAN    | 62,065.90  | 100.00% | 6  | 6  | 7  | 16.20% |
| c(+)-Tiva2 | Zinc finger homeobox protein 4                                                                       | OS=Homo sapiens GN=ZFHX4 PE=1 SV=1     | ZFHX4_HUMAN   | 393,728.70 | 73.90%  | 1  | 1  | 1  | 0.79%  |
| c(+)-Tiva2 | Polypyrimidine tract-binding protein 1                                                               | OS=Homo sapiens GN=PTBP1 PE=1 SV=1     | PTBP1_HUMAN   | 57,222.50  | 100.00% | 4  | 4  | 4  | 9.79%  |
| c(+)-Tiva2 | AP-2 complex subunit alpha-1                                                                         | OS=Homo sapiens GN=AP2A1 PE=1 SV=3     | AP2A1_HUMAN   | 107,548.70 | 95.00%  | 1  | 1  | 1  | 1.33%  |
| c(+)-Tiva2 | Aspartate--tRNA ligase, cytoplasmic                                                                  | OS=Homo sapiens GN=DARS PE=1 SV=2      | SYDC_HUMAN    | 57,136.70  | 99.90%  | 1  | 1  | 1  | 2.99%  |
| c(+)-Tiva2 | Elongation factor 1-gamma                                                                            | OS=Homo sapiens GN=EEF1G PE=1 SV=3     | EF1G_HUMAN    | 50,119.40  | 100.00% | 2  | 2  | 2  | 5.26%  |
| c(+)-Tiva2 | Filamin-A                                                                                            | OS=Homo sapiens GN=FLNA PE=1 SV=4      | FLNA_HUMAN    | 280,729.40 | 100.00% | 27 | 27 | 29 | 18.50% |
| c(+)-Tiva2 | Trifunctional enzyme subunit beta, mitochondrial                                                     | OS=Homo sapiens GN=HADHB PE=1 SV=3     | ECHB_HUMAN    | 51,296.00  | 100.00% | 2  | 2  | 2  | 6.96%  |
| c(+)-Tiva2 | Supervillin                                                                                          | OS=Homo sapiens GN=SVIL PE=1 SV=2      | SVIL_HUMAN    | 247,747.10 | 100.00% | 39 | 45 | 47 | 26.10% |
| c(+)-Tiva2 | Integrin alpha-6                                                                                     | OS=Homo sapiens GN=ITGA6 PE=1 SV=4     | ITA6_HUMAN    | 126,636.10 | 95.00%  | 1  | 1  | 1  | 2.74%  |
| c(+)-Tiva2 | Trifunctional enzyme subunit alpha, mitochondrial                                                    | OS=Homo sapiens GN=HADHA PE=1 SV=2     | ECHA_HUMAN    | 83,001.90  | 100.00% | 7  | 7  | 8  | 12.60% |
| c(+)-Tiva2 | Rab11 family-interacting protein 1                                                                   | OS=Homo sapiens GN=RAB11FIP1 PE=1 SV=2 | RFIP1_HUMAN   | 137,197.60 | 76.80%  | 1  | 1  | 1  | 0.94%  |
| c(+)-Tiva2 | Tubulin alpha-1C chain                                                                               | OS=Homo sapiens GN=TUBA1C PE=1 SV=1    | TBA1C_HUMAN   | 49,895.50  | 26.00%  | 0  | 0  | 0  | 0.00%  |
| c(+)-Tiva2 | Myosin-11                                                                                            | OS=Homo sapiens GN=MYH11 PE=1 SV=3     | MYH11_HUMAN   | 227,344.60 | 100.00% | 8  | 10 | 11 | 4.72%  |
| c(+)-Tiva2 | Actin-related protein 2/3 complex subunit 1B                                                         | OS=Homo sapiens GN=ARPC1B PE=1 SV=3    | ARC1B_HUMAN   | 40,949.80  | 100.00% | 4  | 4  | 4  | 17.50% |
| c(+)-Tiva2 | Myosin-10                                                                                            | OS=Homo sapiens GN=MYH10 PE=1 SV=3     | MYH10_HUMAN   | 229,005.30 | 100.00% | 45 | 56 | 57 | 27.20% |
| c(+)-Tiva2 | U4/U6.U5 tri-snRNP-associated protein 1                                                              | OS=Homo sapiens GN=SART1 PE=1 SV=1     | SNUT1_HUMAN   | 90,257.10  | 100.00% | 2  | 2  | 2  | 4.63%  |
| c(+)-Tiva2 | Collagen alpha-1(VII) chain                                                                          | OS=Homo sapiens GN=COL7A1 PE=1 SV=2    | CO7A1_HUMAN   | 295,217.50 | 100.00% | 8  | 8  | 8  | 4.45%  |
| c(+)-Tiva2 | Cadherin-3                                                                                           | OS=Homo sapiens GN=CDH3 PE=1 SV=2      | CADH3_HUMAN   | 91,419.10  | 64.10%  | 1  | 1  | 1  | 1.93%  |
| c(+)-Tiva2 | D-beta-hydroxybutyrate dehydrogenase, mitochondrial                                                  | OS=Homo sapiens GN=BDH1 PE=1 SV=3      | BDH_HUMAN     | 38,157.90  | 92.50%  | 1  | 1  | 1  | 3.21%  |
| c(+)-Tiva2 | 78 kDa glucose-regulated protein                                                                     | OS=Homo sapiens GN=HSPA5 PE=1 SV=2     | GRP78_HUMAN   | 72,334.70  | 100.00% | 20 | 20 | 20 | 39.10% |
| c(+)-Tiva2 | Serine/threonine-protein kinase 31                                                                   | OS=Homo sapiens GN=STK31 PE=2 SV=2     | STK31_HUMAN   | 115,698.20 | 68.60%  | 1  | 1  | 1  | 1.77%  |
| c(+)-Tiva2 | Bifunctional glutamate/proline--tRNA ligase                                                          | OS=Homo sapiens GN=EPRS PE=1 SV=5      | SYEP_HUMAN    | 70,593.20  | 100.00% | 7  | 7  | 7  | 7.47%  |
| c(+)-Tiva2 | Desmoglein-2                                                                                         | OS=Homo sapiens GN=DSG2 PE=1 SV=2      | DSG2_HUMAN    | 122,294.40 | 100.00% | 2  | 2  | 2  | 2.86%  |
| c(+)-Tiva2 | T-complex protein 1 subunit eta                                                                      | OS=Homo sapiens GN=CTCF PE=1 SV=2      | TCPH_HUMAN    | 59,367.80  | 65.60%  | 1  | 1  | 1  | 2.95%  |
| c(+)-Tiva2 | Keratin, type II cytoskeletal 6A                                                                     | OS=Homo sapiens GN=KRT6A PE=1 SV=3     | K2C6A_HUMAN   | 60,046.40  | 100.00% | 6  | 6  | 6  | 13.70% |
| c(+)-Tiva2 | Nucleoporin Nup43                                                                                    | OS=Homo sapiens GN=NUP43 PE=1 SV=1     | NUP43_HUMAN   | 42,150.00  | 99.90%  | 1  | 1  | 1  | 3.68%  |
| c(+)-Tiva2 | X-ray repair cross-complementing protein 5                                                           | OS=Homo sapiens GN=XRCC5 PE=1 SV=3     | XRCC5_HUMAN   | 82,707.10  | 100.00% | 3  | 3  | 3  | 5.87%  |
| c(+)-Tiva2 | Doublecortin domain-containing protein 5                                                             | OS=Homo sapiens GN=DCDC5 PE=2 SV=2     | DCDC5_HUMAN   | 72,754.10  | 69.60%  | 1  | 1  | 1  | 2.16%  |
| c(+)-Tiva2 | Cytosin-A                                                                                            | OS=Homo sapiens GN=SPECCL1 PE=1 SV=2   | CYTA_HUMAN    | 124,605.40 | 100.00% | 4  | 4  | 4  | 5.46%  |
| c(+)-Tiva2 | Coatomer subunit beta                                                                                | OS=Homo sapiens GN=COPB1 PE=1 SV=3     | COPB_HUMAN    | 107,146.00 | 100.00% | 2  | 2  | 2  | 3.78%  |
| c(+)-Tiva2 | CD59 glycoprotein                                                                                    | OS=Homo sapiens GN=CD59 PE=1 SV=1      | CD59_HUMAN    | 14,177.20  | 99.50%  | 1  | 1  | 1  | 9.38%  |
| c(+)-Tiva2 | Ubiquitin-60S ribosomal protein L40                                                                  | OS=Homo sapiens GN=UBA52 PE=1 SV=2     | RL40_HUMAN    | 14,728.90  | 84.60%  | 1  | 1  | 1  | 12.50% |
| c(+)-Tiva2 | Dihydropyridine-residue acetyltransferase component of pyruvate dehydrogenase complex, mitochondrial | OS=Homo sapiens GN=PDH2 PE=1 SV=2      | ODP2_HUMAN    | 68,997.20  | 100.00% | 6  | 6  | 6  | 11.40% |
| c(+)-Tiva2 | Tropomyosin alpha-1 chain                                                                            | OS=Homo sapiens GN=TPM1 PE=1 SV=2      | TPM1_HUMAN    | 32,710.00  | 100.00% | 3  | 3  | 4  | 12.30% |
| c(+)-Tiva2 | Heterogeneous nuclear ribonucleoprotein L                                                            | OS=Homo sapiens GN=HNRNPL PE=1 SV=2    | HNRPL_HUMAN   | 64,132.80  | 100.00% | 8  | 10 | 10 | 25.60% |
| c(+)-Tiva2 | Heterogeneous nuclear ribonucleoprotein K                                                            | OS=Homo sapiens GN=HNRNPK PE=1 SV=1    | HNRPK_HUMAN   | 50,978.50  | 100.00% | 5  | 5  | 5  | 16.40% |
| c(+)-Tiva2 | 26S protease regulatory subunit 8                                                                    | OS=Homo sapiens GN=PSMC8 PE=1 SV=1     | PRS8_HUMAN    | 45,627.20  | 76.70%  | 1  | 1  | 1  | 2.71%  |
| c(+)-Tiva2 | AP-2 complex subunit mu                                                                              | OS=Homo sapiens GN=AP2M1 PE=1 SV=2     | AP2M1_HUMAN   | 49,655.70  | 24.70%  | 0  | 0  | 0  | 0.00%  |
| c(+)-Tiva2 | Guanine nucleotide-binding protein (G) subunit alpha-1                                               | OS=Homo sapiens GN=GNAI1 PE=1 SV=2     | GNAI1_HUMAN   | 40,362.50  | 100.00% | 1  | 1  | 1  | 3.11%  |
| c(+)-Tiva2 | Putative 60S ribosomal protein L13a-like                                                             | MGCR7657 OS=Homo sapiens PE=5 SV=1     | L13AX_HUMAN   | 12,135.00  | 84.30%  | 1  | 1  | 1  | 10.80% |
| c(+)-Tiva2 | Ribosome-binding protein 1                                                                           | OS=Homo sapiens GN=RRBP1 PE=1 SV=4     | RRBP1_HUMAN   | 152,470.60 | 100.00% | 2  | 2  | 2  | 2.13%  |
| c(+)-Tiva2 | Complement component 1 Q subcomponent-binding protein, mitochondrial                                 | OS=Homo sapiens GN=C1QBPE1 PE=1 SV=1   | C1QBPE1_HUMAN | 31,362.60  | 100.00% | 2  | 2  | 3  | 16.70% |
| c(+)-Tiva2 | F-actin-capping protein subunit alpha-1                                                              | OS=Homo sapiens GN=CAPZA1 PE=1 SV=3    | CAZA1_HUMAN   | 32,923.20  | 100.00% | 4  | 4  | 4  | 24.10% |
| c(+)-Tiva2 | 60S acidic ribosomal protein P0-like                                                                 | OS=Homo sapiens GN=RLPOP6 PE=5 SV=1    | RLA0L_HUMAN   | 34,365.10  | 100.00% | 2  | 2  | 3  | 6.94%  |
| c(+)-Tiva2 | Laminin subunit beta-2                                                                               | OS=Homo sapiens GN=LAMB2 PE=1 SV=2     | LAMB2_HUMAN   | 195,975.90 | 92.60%  | 1  | 1  | 1  | 0.61%  |
| c(+)-Tiva2 | Coronin-1C                                                                                           | OS=Homo sapiens GN=CORO1C PE=1 SV=1    | COR1C_HUMAN   | 53,250.30  | 100.00% | 21 | 26 | 27 | 49.60% |
| c(+)-Tiva2 | Procollagen-lysine, 2-oxoglutarate 5-dioxygenase 1                                                   | OS=Homo sapiens GN=PLOD1 PE=1 SV=2     | PLOD1_HUMAN   | 83,552.50  | 92.70%  | 1  | 1  | 1  | 2.06%  |
| c(+)-Tiva2 | Pyruvate kinase isozymes M1/M2                                                                       | OS=Homo sapiens GN=PKM PE=1 SV=4       | KPYM_HUMAN    | 57,937.50  | 100.00% | 3  | 3  | 4  | 10.50% |
| c(+)-Tiva2 | Mitochondrial inner membrane protein                                                                 | OS=Homo sapiens GN=IMMT PE=1 SV=1      | IMMT_HUMAN    | 83,679.00  | 100.00% | 1  | 1  | 1  | 1.19%  |
| c(+)-Tiva2 | Probable ATP-dependent RNA helicase DDX17                                                            | OS=Homo sapiens GN=DDX17 PE=1 SV=2     | DDX17_HUMAN   | 80,274.00  | 100     |    |    |    |        |

|            |                                                                                                    |              |            |         |    |    |    |        |
|------------|----------------------------------------------------------------------------------------------------|--------------|------------|---------|----|----|----|--------|
| c(+)-Tiva2 | Phenylalanine-4-hydroxylase OS=Homo sapiens GN=PAH PE=1 SV=1                                       | PH4H_HUMAN   | 51,864.40  | 52.80%  | 1  | 1  | 1  | 2.43%  |
| c(+)-Tiva2 | LIM domain only protein 7 OS=Homo sapiens GN=LMO7 PE=1 SV=3                                        | LMO7_HUMAN   | 192,699.40 | 100.00% | 31 | 32 | 35 | 25.10% |
| c(+)-Tiva2 | WD40 repeat-containing protein SMU1 OS=Homo sapiens GN=SMU1 PE=1 SV=2                              | SMU1_HUMAN   | 57,544.80  | 100.00% | 2  | 2  | 2  | 5.85%  |
| c(+)-Tiva2 | T-complex protein 1 subunit gamma OS=Homo sapiens GN=CCT3 PE=1 SV=4                                | TCPG_HUMAN   | 60,535.40  | 83.20%  | 1  | 1  | 1  | 2.02%  |
| c(+)-Tiva2 | Nucleolin OS=Homo sapiens GN=NCL PE=1 SV=3                                                         | NUCL_HUMAN   | 76,615.90  | 100.00% | 12 | 16 | 18 | 20.70% |
| c(+)-Tiva2 | 5'-nucleotidase OS=Homo sapiens GN=NT5E PE=1 SV=1                                                  | 5NTD_HUMAN   | 63,369.00  | 100.00% | 3  | 3  | 3  | 7.14%  |
| c(+)-Tiva2 | Keratin, type II cytoskeletal 7 OS=Homo sapiens GN=KRT7 PE=1 SV=5                                  | K2C7_HUMAN   | 51,387.30  | 100.00% | 16 | 22 | 22 | 39.90% |
| c(+)-Tiva2 | DNA-dependent protein kinase catalytic subunit OS=Homo sapiens GN=PRKDC PE=1 SV=3                  | PRKDC_HUMAN  | 469,095.50 | 100.00% | 24 | 24 | 24 | 7.75%  |
| c(+)-Tiva2 | ATP synthase subunit beta, mitochondrial OS=Homo sapiens GN=ATP5B PE=1 SV=3                        | ATPB_HUMAN   | 56,560.60  | 100.00% | 3  | 3  | 3  | 8.13%  |
| c(+)-Tiva2 | Unconventional myosin-Ib OS=Homo sapiens GN=MYO1B PE=1 SV=3                                        | MYO1B_HUMAN  | 131,990.70 | 100.00% | 26 | 32 | 33 | 26.10% |
| c(+)-Tiva2 | 60S ribosomal protein L18 OS=Homo sapiens GN=RPL18 PE=1 SV=2                                       | RL18_HUMAN   | 21,635.20  | 95.00%  | 1  | 1  | 1  | 6.91%  |
| c(+)-Tiva2 | Unconventional myosin-Ia OS=Homo sapiens GN=MYO1A PE=1 SV=1                                        | MYO1A_HUMAN  | 118,404.40 | 100.00% | 2  | 2  | 2  | 2.78%  |
| c(+)-Tiva2 | Heterogeneous nuclear ribonucleoprotein U-like protein 2 OS=Homo sapiens GN=HNRNPUL2 PE=1 SV=1     | HNRL2_HUMAN  | 85,105.20  | 100.00% | 7  | 8  | 8  | 15.70% |
| c(+)-Tiva2 | Isoleucine-tRNA ligase, cytoplasmic OS=Homo sapiens GN=IARS PE=1 SV=2                              | SVIC_HUMAN   | 144,501.80 | 100.00% | 2  | 2  | 2  | 2.77%  |
| c(+)-Tiva2 | Lamin-B2 OS=Homo sapiens GN=LMNB2 PE=1 SV=3                                                        | LMNB2_HUMAN  | 67,689.80  | 88.60%  | 1  | 1  | 1  | 1.67%  |
| c(+)-Tiva2 | Sodium/potassium-transporting ATPase subunit alpha-1 OS=Homo sapiens GN=ATP1A1 PE=1 SV=1           | AT1A1_HUMAN  | 112,899.50 | 100.00% | 6  | 6  | 6  | 8.80%  |
| c(+)-Tiva2 | X-ray repair cross-complementing protein 6 OS=Homo sapiens GN=XRCC6 PE=1 SV=2                      | XRCC6_HUMAN  | 69,846.40  | 100.00% | 3  | 3  | 3  | 6.90%  |
| c(+)-Tiva2 | Lamin-B1 OS=Homo sapiens GN=LMNB1 PE=1 SV=2                                                        | LMNB1_HUMAN  | 66,409.60  | 99.90%  | 1  | 1  | 1  | 2.39%  |
| c(+)-Tiva2 | Actin-related protein 2/3 complex subunit 2 OS=Homo sapiens GN=ARPC2 PE=1 SV=1                     | ARPC2_HUMAN  | 34,333.70  | 100.00% | 5  | 5  | 5  | 20.30% |
| c(+)-Tiva2 | Histone H4 OS=Homo sapiens GN=HIST1H4A PE=1 SV=2                                                   | H4_HUMAN     | 11,367.70  | 100.00% | 2  | 2  | 2  | 19.40% |
| c(+)-Tiva2 | Splicing factor, proline- and glutamine-rich OS=Homo sapiens GN=SFPQ PE=1 SV=2                     | SFPQ_HUMAN   | 76,149.50  | 100.00% | 2  | 2  | 2  | 3.68%  |
| c(+)-Tiva2 | Coatomer subunit delta OS=Homo sapiens GN=ARCN1 PE=1 SV=1                                          | COPD_HUMAN   | 57,211.20  | 77.10%  | 1  | 1  | 1  | 2.35%  |
| c(+)-Tiva2 | Aldehyde dehydrogenase, mitochondrial OS=Homo sapiens GN=ALDH2 PE=1 SV=2                           | ALDH2_HUMAN  | 56,381.40  | 89.90%  | 1  | 1  | 1  | 2.71%  |
| c(+)-Tiva2 | Heat shock 70 kDa protein 6 OS=Homo sapiens GN=HSPA6 PE=1 SV=2                                     | HSP76_HUMAN  | 71,028.80  | 87.20%  | 1  | 1  | 1  | 1.71%  |
| c(+)-Tiva2 | Very long-chain specific acyl-CoA dehydrogenase, mitochondrial OS=Homo sapiens GN=ACADVL PE=1 SV=1 | ACADV_HUMAN  | 70,391.60  | 94.90%  | 0  | 0  | 0  | 0.00%  |
| c(+)-Tiva2 | Basigin OS=Homo sapiens GN=BSG PE=1 SV=2                                                           | BASI_HUMAN   | 42,199.70  | 93.10%  | 0  | 0  | 0  | 0.00%  |
| c(+)-Tiva2 | Keratin, type II cytoskeletal 79 OS=Homo sapiens GN=KRT79 PE=1 SV=2                                | K2C79_HUMAN  | 57,836.00  | 95.00%  | 1  | 1  | 1  | 1.87%  |
| c(+)-Tiva2 | Guanine nucleotide-binding protein G(i) subunit alpha-2 OS=Homo sapiens GN=GNAI2 PE=1 SV=3         | GNAI2_HUMAN  | 40,452.00  | 99.70%  | 1  | 1  | 1  | 5.35%  |
| c(+)-Tiva2 | 60S ribosomal protein L19 OS=Homo sapiens GN=RPL19 PE=1 SV=1                                       | RL19_HUMAN   | 23,467.40  | 9.60%   | 0  | 0  | 0  | 0.00%  |
| c(+)-Tiva2 | Leucine-rich PPR motif-containing protein, mitochondrial OS=Homo sapiens GN=LRPPRC PE=1 SV=3       | LRPRC_HUMAN  | 157,912.20 | 100.00% | 9  | 9  | 9  | 8.03%  |
| c(+)-Tiva2 | Heterogeneous nuclear ribonucleoprotein M OS=Homo sapiens GN=HNRNPM PE=1 SV=3                      | HNRPM_HUMAN  | 77,517.30  | 100.00% | 7  | 7  | 7  | 10.80% |
| c(+)-Tiva2 | Glypican-1 OS=Homo sapiens GN=GPC1 PE=1 SV=2                                                       | GPC1_HUMAN   | 61,681.30  | 100.00% | 1  | 1  | 1  | 3.05%  |
| c(+)-Tiva2 | Protein FAM83H OS=Homo sapiens GN=FAM83H PE=1 SV=3                                                 | FAM83H_HUMAN | 127,123.90 | 100.00% | 4  | 4  | 4  | 7.12%  |
| c(+)-Tiva2 | 40S ribosomal protein S12 OS=Homo sapiens GN=RPS12 PE=1 SV=3                                       | RS12_HUMAN   | 14,514.80  | 91.70%  | 1  | 1  | 1  | 6.82%  |
| c(+)-Tiva2 | Tubulin beta-4A chain OS=Homo sapiens GN=TUBB4A PE=1 SV=2                                          | TBB4A_HUMAN  | 49,585.50  | 100.00% | 3  | 4  | 4  | 13.30% |
